# Supplementary material for: Single-cell transcriptomics defines heterogeneity of epicardial cells and fibroblasts within the infarcted murine heart
Source: eLife. 2021 Jun 21;10:e65921. doi: 10.7554/eLife.65921 (PMC8216715; doi:10.7554/eLife.65921)
Supplement: Figure 1—source data 1. [file elife-65921-fig1-data1.xlsx]

## Sheet: Tabelle1
EpiSC population	No. of cells
1	2879
2	2854
3	1806
4	1710
5	1431
6	735
7	438
8	361
9	253
10	195
11	183
