# Supplementary material for: Single-cell transcriptomics defines heterogeneity of epicardial cells and fibroblasts within the infarcted murine heart
Source: eLife. 2021 Jun 21;10:e65921. doi: 10.7554/eLife.65921 (PMC8216715; doi:10.7554/eLife.65921)
Supplement: Figure 4—figure supplement 1—source data 1. [file elife-65921-fig4-figsupp1-data1.xlsx]

## Sheet: Tabelle1
aCSC population	No. of cells
1	5393
2	5232
3	3105
4	2519
5	1887
6	1213
7	981
8	799
9	626
10	551
11	210
