# Supplementary material for: Single-cell transcriptomics defines heterogeneity of epicardial cells and fibroblasts within the infarcted murine heart
Source: eLife. 2021 Jun 21;10:e65921. doi: 10.7554/eLife.65921 (PMC8216715; doi:10.7554/eLife.65921)
Supplement: Figure 4—figure supplement 4—source data 1. [file elife-65921-fig4-figsupp4-data1.xlsx]

## Sheet: Tabelle1
CSC population	No. of cells
1	5285
2	3888
3	3291
4	2920
5	1906
6	1064
7	1013
8	632
9	354
10	311
11	288
12	108
