# Supplementary material for: Single-cell transcriptomics defines heterogeneity of epicardial cells and fibroblasts within the infarcted murine heart
Source: eLife. 2021 Jun 21;10:e65921. doi: 10.7554/eLife.65921 (PMC8216715; doi:10.7554/eLife.65921)
Supplement: Figure 4—figure supplement 7—source data 1. [file elife-65921-fig4-figsupp7-data1.xlsx]

## Sheet: ClusterA_EpiSC_CSC
gene	log2 fold change EpiSC:CSC	-log10 p-value
Hba-a1	7.50175	15.5107
Hba-a2	7.01236	14.8881
Cxcl5	6.84743	17.2777
Sqle	6.59179	9.58403
Sfn	6.22719	18.8989
Steap1	6.0623	16.3655
Sh2d5	6.04995	5.24882
Hp	5.90734	24.9715
Pclaf	5.70763	8.82054
Spp1	5.67126	14.3003
Uhrf1	5.64016	4.97446
Cenpe	5.61442	3.9534
Rrm2	5.51018	6.80922
Ube2c	5.3825	7.83224
Aurka	5.21522	2.98901
Hs6st2	5.09536	3.96132
Tk1	5.08318	8.52016
Spc25	5.01774	6.49915
Gm15706	4.97393	4.23503
Ccl9	4.94371	9.90747
Cep55	4.94244	2.86412
Ccnb1	4.92675	7.99189
Pf4	4.87039	5.03389
Aox3	4.81623	4.92157
Top2a	4.78251	4.56181
Mxd3	4.76866	2.9967
Kcnn4	4.74007	4.78952
Nuf2	4.73857	3.67017
Tacc3	4.72581	6.04163
Ctla2a	4.65946	9.95178
Stmn2	4.60017	3.11041
Mis18bp1	4.59433	2.86029
Serinc2	4.52861	1.65834
Gjb4	4.52214	13.4902
C330027C09Rik	4.51701	3.94944
Cdkn2a	4.45147	2.32985
Plek2	4.35726	7.9713
Bcat1	4.34155	4.60171
Gpbar1	4.33495	2.58873
Hbb-bs	4.28565	17.001
Tnc	4.25503	7.19764
Cd109	4.23401	6.14616
Plk1	4.20688	4.31685
Tfpi2	4.20613	3.51577
Ung	4.17834	3.43769
Melk	4.15088	2.71291
Wrap53	4.14087	5.1471
Dscc1	4.09587	2.58494
Ube2t	4.08471	2.97367
Clspn	4.07834	2.83739
Ecscr	4.07757	7.14633
Prc1	4.04215	4.20005
Kifc1	4.02858	2.43471
Arhgdig	4.01569	5.71019
Cemip	4.01158	2.31113
Igkc	4.00173	6.73341
Dglucy	3.96984	3.10656
Ccl2	3.93064	15.6625
Dlgap5	3.9211	2.18772
Cenpf	3.89514	3.63494
Cdc25c	3.83273	2.17285
Angptl4	3.81251	24.1024
Slfn2	3.8	15.2439
Dusp9	3.79191	2.44598
Timm23	3.7747	2.31113
Fkbp11	3.74292	24.874
Mcm3	3.73205	7.11349
Cmtm8	3.72558	3.21677
Dtl	3.68659	3.49242
Ada	3.68135	5.69785
Dbf4	3.67733	3.74674
Tulp1	3.67614	2.04594
Hist1h2ap	3.62964	1.32721
Bub1	3.61292	1.77052
Tmem8	3.5942	1.11412
Sprr1a	3.58377	4.38771
Mbnl3	3.56693	1.38657
Gjb3	3.56384	18.9668
Aspm	3.55663	1.64387
Cks2	3.53677	17.1815
Asf1b	3.53427	4.74605
Ccsap	3.52695	1.25577
Exoc3l4	3.50822	6.99637
Kif20b	3.50063	2.89397
Gatm	3.4789	8.2504
Alas2	3.46691	7.15713
Ap5z1	3.46369	2.31487
Cdh2	3.46325	5.47013
BC065403	3.46089	2.03488
Tpx2	3.45808	5.20556
Fgd1	3.44921	4.01874
Prps1l3	3.43306	2.03488
Ckap2l	3.42359	2.73003
Cd24a	3.41381	3.89958
Tinagl1	3.4075	26.9781
Kif2c	3.4065	2.67506
Pbk	3.38991	4.59637
Ttc39a	3.38925	4.08958
Pycr1	3.38863	6.56809
Cenpu	3.37766	2.15803
Kif20a	3.3754	4.84076
Cdk1	3.37517	12.1984
Saa3	3.37468	33.1893
Gm8773	3.37075	7.2958
Acta2	3.36791	30.7131
F2rl1	3.33827	2.54725
Nectin4	3.32496	2.04225
Rhox5	3.3225	1.10373
Gch1	3.30396	7.32438
Insl6	3.29348	3.47302
Nup93	3.2814	10.3932
Cep76	3.27446	1.24873
Dolpp1	3.26415	3.47302
Fam178b	3.25656	1.77052
Robo1	3.25617	1.25225
Depdc1a	3.25408	2.416
Cenpm	3.24804	5.21722
H19	3.24643	3.06823
Oas1a	3.23035	17.0804
Ncapg	3.21919	2.67506
Etnk2	3.21135	2.41973
Lpcat2	3.2047	6.20649
Calca	3.19544	2.54349
Nol10	3.18118	2.93931
Cthrc1	3.18114	27.5392
Ncam1	3.17278	14.9689
Pdss1	3.16407	4.27716
Ect2	3.15854	3.68052
Siah1b	3.14171	3.19756
Ccnb2	3.12729	8.41761
Bub1b	3.12255	2.93931
Lockd	3.12017	6.29441
Aqp5	3.11887	6.09106
Timeless	3.11593	2.10126
Cdca3	3.10777	6.83493
Trac	3.10383	2.54349
Rad51	3.09282	3.75501
Ska1	3.09009	2.28876
Tubb3	3.0867	11.9429
Mcm5	3.07654	5.49708
Cdkl5	3.06913	1.37592
Tmem79	3.05488	3.91802
Nol9	3.04527	3.73503
Myl9	3.04504	11.6851
Gm10053	3.03507	3.32732
Spc24	3.03288	6.16526
Pop1	3.02712	3.45755
Hmmr	3.0233	3.06823
Cdc20	3.00072	8.73822
Tm6sf2	2.98775	3.06441
Tstd3	2.97745	5.62636
Nkrf	2.97735	1.24522
Tmem97	2.97467	10.7248
Raet1e	2.96647	4.66929
Azin2	2.96083	2.15434
Cdca8	2.92944	6.17399
Slc16a3	2.92912	22.7369
Lgi2	2.92537	2.15803
Ptpre	2.9246	0.716628
Mcm2	2.92325	6.34901
Laptm5	2.91897	0.716628
Wfdc18	2.91393	3.61848
Slc51a	2.91117	1.76326
Tesc	2.90829	24.8569
Kif4	2.89886	1.75964
Cenpi	2.8879	1.76326
Wasf1	2.88758	6.66737
Cenpk	2.88189	4.60401
Klhdc8a	2.87987	8.86699
Zfp979	2.8688	1.36178
Wnt11	2.86698	1.32506
Cnnm2	2.86671	0.57865
Idi1	2.86045	9.96539
Urah	2.85708	4.93489
Birc5	2.84787	10.0368
Alg8	2.83967	9.52784
Gm11266	2.83821	1.50279
Ccne2	2.83047	2.13958
Oasl1	2.80482	7.27164
Dhx58os	2.80372	1.36178
Nxf7	2.79159	1.88257
Ckap2	2.78512	3.46528
Hsd17b7	2.7777	2.27761
Ncapg2	2.76678	3.86114
Lbh	2.76595	16.3213
Dnph1	2.75575	4.6544
Glipr2	2.75285	9.67318
H2-Q6	2.75105	9.76214
Cgref1	2.74784	1.45064
Gm14410	2.74674	1.49565
Gap43	2.73896	4.50864
Kalrn	2.73347	2.46394
Pimreg	2.73111	1.81498
Lox	2.72936	19.5935
Hist1h1b	2.71389	1.62586
Neurl1a	2.71191	0.57865
Lrrc40	2.71079	4.30988
Hpx	2.70581	0.833258
Apoa1	2.69961	0.836605
Cdkn3	2.69322	7.02734
Tubb6	2.69097	14.9442
Pstpip1	2.68741	3.2023
Mmab	2.68688	4.38426
Zfp276	2.68545	1.75602
Runx1	2.68331	5.84305
Cnn1	2.67099	1.49922
Spef1	2.6639	1.75602
Gm41307	2.65968	4.42453
Cdk2	2.65944	6.24819
Ccl7	2.65707	13.5006
Dlx4	2.65641	2.33356
Ypel1	2.65429	1.62227
Ubtd1	2.65316	6.28107
Lhx6	2.62224	1.4921
AA986860	2.62206	0.710018
Cyp51	2.61765	9.9844
Gpc1	2.60684	0.439163
Halr1	2.60641	1.24522
Chst1	2.60022	5.46809
Rab42	2.59751	2.27761
Fen1	2.59681	5.13657
Fam83d	2.59549	2.59494
B3gntl1	2.5942	1.75602
Kcnk6	2.59049	1.62586
Plppr2	2.5829	1.23122
Yars2	2.57654	5.39206
S100a4	2.56517	19.4702
Casc1	2.56082	0.710018
Glipr1	2.55991	5.55856
Ncaph	2.55099	2.2702
Ppp1r18os	2.54556	0.71332
Ttk	2.53393	0.979044
Fscn1	2.53307	16.1188
Tspan14	2.52997	2.46736
Nkain1	2.52701	0.846681
Sigirr	2.52551	1.81821
Gm6598	2.51614	0.436046
Sorcs2	2.51564	1.62586
Nusap1	2.51262	1.53953
Fam206a	2.51117	5.48907
Ltc4s	2.50862	1.87893
Nt5dc2	2.49947	7.76842
Slc2a10	2.49465	1.61869
Adgrg2	2.49236	13.3926
Arhgap11a	2.4815	1.88257
Rmdn2	2.47457	4.66196
Smc2	2.47445	7.84292
Cdk17	2.47131	1.62227
Prepl	2.46588	2.29313
Mcts2	2.45666	5.50721
Lypd1	2.45421	0.839958
Nfatc1	2.45231	1.74879
Prr7	2.44812	2.00552
Sfrp4	2.44637	0.975627
Rpf2	2.44491	12.6591
Mvd	2.44101	3.91563
H2-Q7	2.44073	15.5442
1700066B19Rik	2.43922	0.846681
2200002D01Rik	2.43725	22.2856
Ston1	2.42907	1.62227
Ppa1	2.42823	19.5622
Piwil2	2.42794	0.843316
Vav3	2.42056	3.78432
Adamts3	2.41857	1.10373
Oip5	2.4184	2.2739
Cenpl	2.41829	2.2665
Ccna2	2.41727	4.96512
Zbtb3	2.40839	1.4921
Ptprn	2.40651	2.39735
Tfap4	2.40226	2.00552
Plac8	2.39962	11.3355
Chst11	2.39817	4.23346
Serpinb9b	2.39799	2.00918
Rgs4	2.38735	1.04636
Knl1	2.38628	2.68155
Il6	2.38501	4.18364
Slit2	2.3833	3.6306
Slc7a5	2.38074	1.55796
Lyn	2.38032	1.87893
Tnfrsf12a	2.3721	21.7603
Timp1	2.36998	36.7755
Krt14	2.36631	15.5361
Zfp78	2.36294	0.839958
Tm9sf1	2.35226	1.81174
Ubox5	2.35204	1.23471
Gchfr	2.3498	1.23122
Kif15	2.34755	1.20617
Uap1	2.34527	16.2711
Alg3	2.3314	10.015
Pkp3	2.31995	10.4314
Diaph3	2.3158	5.59222
Cxcl10	2.30577	3.58825
Angptl7	2.30442	8.08536
Apoh	2.30183	0.710018
Ociad2	2.30114	9.36718
Gins2	2.30007	7.13643
Etaa1os	2.29816	1.48854
Bbs5	2.28982	3.97559
Rassf7	2.2824	2.66
Shisa4	2.28211	10.5967
Gm39469	2.27548	2.17376
Cyp26a1	2.27457	1.23122
Ulbp1	2.27038	2.79185
Fam111a	2.26644	6.14387
Prmt5	2.26211	8.8752
Tnni1	2.26105	2.9493
Rnf208	2.25755	0.297793
Pak6	2.2544	0.972215
Adora2b	2.24554	9.6423
Gm14327	2.243	0.568999
Ptger3	2.23871	2.8674
Gm10638	2.22123	0.965408
Cenpp	2.2181	1.93958
Ttc9	2.21323	17.1009
Dmkn	2.21068	29.8002
B130006D01Rik	2.20653	0.436046
Tnfrsf11b	2.20235	2.69398
Ddc	2.20149	3.52443
Trip13	2.19763	3.28411
Ttll4	2.19403	1.48854
Tnfrsf23	2.19218	3.3762
Syce2	2.18749	5.21615
Gdpgp1	2.1846	0.836605
Cdc25b	2.18095	2.1359
Micall2	2.18056	0.972215
Rps6kc1	2.17345	1.92326
Mark4	2.17325	1.907
Slc25a13	2.17323	2.41244
Gale	2.16861	10.16
Cdc42bpg	2.16805	1.07008
Gm13205	2.16352	4.03696
Bag2	2.16044	1.94285
Map2k6	2.15837	0.297793
Gm10131	2.15754	2.54349
Ppm1h	2.15705	3.31963
Mvk	2.15609	4.35887
Cenpa	2.15386	7.76423
Aunip	2.15345	2.13222
Slc25a47	2.15221	0.968808
Piga	2.15071	1.48854
Fam78b	2.15069	2.00186
Angptl6	2.15055	2.79185
Hecw2	2.14732	0.436046
Lsm11	2.14716	5.3254
Fn1	2.14441	24.2344
Lrrc29	2.14437	0.436046
Sez6l	2.14417	1.68135
Nov	2.14167	0.807709
Fdps	2.13805	11.4307
Has1	2.13764	13.5444
Slc27a3	2.13104	6.18862
Gm13212	2.12682	2.04823
Tmem37	2.12457	8.03468
Pno1	2.11777	13.7843
Fcer1g	2.11733	1.23122
Thg1l	2.11676	2.2628
Rnf128	2.1165	16.4302
Ppp2r2b	2.11424	1.09339
Pdia5	2.11044	9.11471
Ezh2	2.10893	6.06868
Tnfaip6	2.1076	7.43927
Mdrl	2.10685	1.48854
Mki67	2.10275	3.18606
Tes	2.08458	8.54331
Nmrk1	2.0838	2.53327
Dera	2.08092	10.4821
B4galnt1	2.07817	2.03836
Slc36a1	2.07394	1.22773
Pcyox1l	2.07229	3.42157
Kdelr3	2.07136	13.8837
Top1mt	2.07039	3.00644
Knstrn	2.06177	3.09658
Ccdc68	2.05989	2.61794
Rassf5	2.0577	1.61511
Cox18	2.05413	9.66635
Limd2	2.05338	7.61375
Fap	2.05227	0.703434
Tgfb1	2.05034	7.3081
Lrrfip1	2.05021	9.92718
Ntf5	2.04265	6.19876
Bzw2	2.03979	8.71518
Zswim4	2.03725	1.3159
Hmga1	2.03572	3.3921
Plk2	2.02785	4.68355
Nek4	2.02776	3.46539
Ripk3	2.02762	11.3815
Oas1g	2.02757	3.68921
Eya3	2.0262	2.40621
Amigo3	2.02016	0.568999
Zfp365	2.01761	0.351185
Plaur	2.01715	10.6422
Gm12031	2.01607	0.297793
Haus8	2.01332	2.66434
Fam126a	2.01022	4.82333
Hmgcr	2.0099	4.11317
Msmo1	2.00903	10.2621
Il13ra1	2.00834	17.0264
Tmem47	2.0075	2.00918
Pcdh7	2.00444	2.95192
Lrrn2	2.00192	3.94219
Tmem45a	2.00131	9.33559
Ero1l	1.9956	7.69787
Mlkl	1.9948	6.78819
Guca1a	1.99163	8.94407
Anxa8	1.99114	20.7696
P2rx5	1.98616	0.706722
Uchl1	1.97739	4.7397
Slc35d2	1.97341	3.9532
Lss	1.97238	2.65748
Dhfr	1.96934	4.03979
Chsy1	1.96864	2.13222
Pgam2	1.9664	2.6142
Pwp2	1.96144	2.27974
Appbp2os	1.95924	0.436046
Gpx7	1.95898	25.2877
Racgap1	1.9579	4.84568
Anapc15	1.95602	9.04025
Mad2l1	1.95415	6.52169
Efnb2	1.95336	6.98778
Pgd	1.94654	12.8114
Krt20	1.9452	1.907
Slpi	1.94183	16.3929
Plod2	1.94092	17.553
Agbl2	1.94075	0.294819
Ppm1j	1.94036	0.436046
Stx1a	1.93889	1.09684
Kif22	1.93861	3.04303
Efcab11	1.93403	1.35474
Mllt11	1.92417	4.42776
Klhl5	1.91953	4.51104
Efna4	1.91891	2.98873
C1qtnf12	1.91857	12.8281
Tmem268	1.91758	0.565797
Ehbp1l1	1.91543	8.18161
Epha4	1.91178	3.89472
Oas1c	1.90587	1.55482
Fastkd3	1.90552	2.59875
Mthfd2	1.90513	5.45155
Ddx39	1.90383	15.9484
Tnfrsf4	1.90286	3.86287
2410131K14Rik	1.89927	2.85761
5033406O09Rik	1.89874	3.24328
Wisp1	1.89741	3.75135
Zfp870	1.88862	1.06422
Atad5	1.8874	1.74518
Cdt1	1.88468	2.67986
Chil1	1.88449	10.2115
Map6	1.88326	4.29725
Gnpnat1	1.88094	13.4299
Ifitm10	1.87674	0.706722
Nsdhl	1.87522	7.90969
Elp6	1.87218	4.21787
Vcam1	1.86816	17.9261
Htatip2	1.86638	16.7766
Etv4	1.86305	0.702875
Gnb1l	1.86213	0.839958
Ap5b1	1.86067	0.965408
Dok4	1.86058	1.54541
Actn1	1.85926	18.5214
Ndrg4	1.85913	2.81352
Vcpkmt	1.85913	8.15534
9530053A07Rik	1.85318	1.09684
Lmna	1.85294	26.5024
Zfp790	1.85181	1.22773
E430018J23Rik	1.85091	2.24804
Senp5	1.85068	5.27649
Plpp7	1.84623	0.426746
Mcm6	1.8462	7.83579
Gnai1	1.84287	10.1307
Rrm1	1.84088	11.0742
Chek1	1.83896	1.74158
Nudt22	1.83847	5.50045
Gnaz	1.83672	1.31891
Polr3g	1.83372	1.55168
Bok	1.83348	17.0587
Elovl1	1.83333	23.0966
Cfap45	1.83184	1.78278
Ppfia3	1.8267	1.09339
Cd164l2	1.82318	1.09339
4732471J01Rik	1.82189	0.833258
Mettl4	1.81915	1.87167
Usp13	1.81683	3.61217
Nxn	1.81621	7.56943
Nkain3	1.81616	3.3921
Lrrc4	1.81531	1.66546
Plxna2	1.81519	2.22773
Sgo2a	1.81424	1.93304
Rnd2	1.81157	0.941065
Arf2	1.80943	12.344
Prkg2	1.80577	2.9145
Ica1	1.80502	1.77105
Enpp1	1.80483	2.40621
Ydjc	1.80428	3.55339
Plk4	1.80092	3.37772
Usp18	1.80075	12.5309
Rdh10	1.79792	9.65282
Arl5c	1.79607	0.962012
Fxyd5	1.7951	13.4243
Prpsap2	1.79141	4.96197
Gm43672	1.78799	1.09684
Lgals1	1.77939	28.1946
Gm10561	1.7784	0.710018
Alkbh4	1.77703	1.30069
Ano10	1.77673	5.33832
Hmgb3	1.77601	10.4116
Gsto1	1.76846	9.71547
Srpx	1.76746	6.71012
Arhgap8	1.76418	3.01789
Triqk	1.76324	3.71622
Zfp54	1.76157	1.89405
Cap2	1.76098	1.30069
Mtbp	1.7588	1.53668
Apol7d	1.7587	0.468608
Ccl8	1.75711	1.09684
C430042M11Rik	1.75394	0.294819
Cep78	1.75219	1.53604
Stip1	1.75097	14.3024
Rpl7a-ps5	1.75073	2.18708
Szt2	1.74508	1.78278
Zfp341	1.74487	1.35826
Slurp1	1.74322	8.69314
Eipr1	1.74158	5.0718
Cd55	1.74036	21.186
Creb3l4	1.74016	0.585155
Tpm2	1.73434	20.8569
Otud3	1.73353	2.52646
Smagp	1.73301	2.12119
Myo1b	1.73269	1.88488
Gss	1.73164	6.29787
Nme1	1.73139	25.6475
Cotl1	1.72988	5.31946
Gm10282	1.72792	0.941065
Gls2	1.72322	0.432938
Slc40a1	1.72306	0.703434
Tbc1d31	1.72198	1.30677
Cd44	1.71953	11.1253
Me2	1.71804	7.16418
Sox8	1.71491	1.35826
Emilin2	1.71322	6.15999
Prr11	1.71284	1.35122
Cdca7	1.71135	3.71894
Fam3c	1.70994	10.7428
Slc7a6	1.70757	3.26549
Cdca4	1.70266	4.31296
Gm17586	1.70229	1.18519
Enah	1.6998	2.49433
Shq1	1.69901	2.57646
Chac1	1.69688	3.43724
Pdxp	1.69455	1.09684
Slc25a30	1.69431	2.1986
Gjb5	1.69168	17.1946
Taco1	1.69153	1.76998
Ran	1.69007	24.8853
Arhgef19	1.68785	1.96081
Adamts4	1.68718	1.22077
Ehd4	1.68526	11.0729
Zfp960	1.68289	0.965408
Sccpdh	1.68281	4.99795
Lgals7	1.68019	19.2232
Zdhhc2	1.67958	1.61511
Ccdc159	1.67812	0.696876
Il1r1	1.67725	5.74882
Gm14403	1.6762	3.6881
Ranbp1	1.67412	23.3566
Fstl1	1.67333	25.7495
Cyp4f16	1.67147	7.43581
Stmn4	1.67035	0.821558
Gm10366	1.67024	0.962012
Mpzl3	1.66945	0.958623
Pold2	1.66822	7.49022
Zfp456	1.66786	1.48499
Gm15445	1.666	0.432938
Akap12	1.66546	6.11273
Gm14005	1.66359	7.77178
Ap5s1	1.65987	5.64267
Als2cl	1.65959	2.01216
Xrcc6	1.65708	6.41864
Ywhah	1.65703	26.4917
Serpine1	1.65457	5.40194
Gdf6	1.65367	3.12315
Dsp	1.65213	1.79993
Gse1	1.65118	1.74638
Nxnl2	1.64517	10.1911
Mustn1	1.64501	5.88614
Ugdh	1.64464	19.8472
Tead3	1.6443	2.40284
Dusp18	1.63918	2.43559
Rpe	1.63911	7.68226
Lrrc2	1.63586	2.86413
Dynlt1c	1.63517	1.61637
Zfp772	1.62935	0.962012
Gm10369	1.62888	1.67816
Lypd8	1.62621	3.20956
Ralgps1	1.62598	0.938212
Casp1	1.62478	1.8435
Focad	1.6244	1.41353
Tm7sf2	1.62435	2.52477
Rgs19	1.62392	8.90146
Bmper	1.62289	5.40151
Nfkbie	1.62269	2.89226
Adam12	1.62197	5.73555
Stxbp6	1.62187	5.64468
Hsd11b2	1.62135	1.09339
Nme4	1.62018	2.55384
Neil2	1.61902	1.09339
1110008F13Rik	1.61344	26.3683
Rbl1	1.61322	2.32342
Carns1	1.61182	1.35122
Ttf2	1.61126	1.96842
Umps	1.60867	6.69475
Paqr6	1.6054	1.05547
Trps1	1.59553	3.53834
Nek6	1.5946	8.47747
Eno3	1.58952	3.89522
Best1	1.58927	3.52692
Nop2	1.58916	3.76445
Ldha	1.58825	26.8411
Hmgcs1	1.58775	7.10481
C1qtnf6	1.58493	8.733
Reep1	1.5826	2.95648
Tubd1	1.58228	2.68117
Stn1	1.58106	6.61684
Dnajb3	1.57982	2.80246
Zfp566	1.57945	1.74518
Acap1	1.57925	0.291856
Jmjd7	1.57732	1.35122
Pgm1	1.57732	8.06475
Ppat	1.57611	2.91144
Gab3	1.57514	0.151439
Prrx2	1.57434	2.47533
Tyms	1.57418	9.64479
Agmat	1.57379	6.59096
Gen1	1.57241	1.35122
Cxcl1	1.57231	10.3351
Pitpna	1.56824	13.126
Cd28	1.5681	1.35122
Rtn1	1.56738	11.7956
A630072M18Rik	1.56692	1.6528
Hirip3	1.56626	3.54998
Nrarp	1.56558	0.471103
Ddx55	1.56444	4.28253
Gm973	1.56323	0.151439
Atpaf1	1.55865	5.88224
Kcnj15	1.55837	0.582556
Arhgap42	1.55813	1.85829
Tsfm	1.55801	11.2373
Dhx58	1.5562	4.75417
Fam189b	1.55487	3.76254
Dhcr24	1.5525	4.85867
Ttll7	1.55194	3.72414
Mfsd13a	1.55061	1.99247
Tmem17	1.5488	2.08203
Amot	1.54853	1.22425
Ctsh	1.54774	6.70134
Mis18a	1.54726	4.44376
Aplf	1.54661	4.28779
Tdg	1.54595	8.40507
Scml4	1.54459	0.154208
Gm10273	1.54257	2.65624
Tnfaip2	1.54234	2.4464
Nudt1	1.54118	6.04465
Gadd45g	1.53642	5.87031
Gusb	1.53333	8.94034
Pih1d2	1.53251	1.89729
Tgif1	1.53151	6.16226
Cenpn	1.53118	2.53327
Anxa2	1.52682	35.7594
1810062G17Rik	1.52637	1.74158
Optn	1.52486	2.93422
Kif23	1.52174	2.51627
Wdr62	1.52095	1.28256
Cks1b	1.5196	11.5333
Cystm1	1.51764	18.5267
Eef1e1	1.51682	12.2226
Clcn5	1.51649	4.2992
Nedd1	1.51507	4.28615
Lrrc59	1.51469	12.0841
Lamc2	1.51442	5.431
Dffa	1.51358	1.27778
Capn7	1.5103	5.69742
Ubtd2	1.50977	4.12088
Kcns3	1.50887	0.946782
Xpnpep1	1.50711	15.4976
Slc6a8	1.50691	3.78377
Nipsnap3b	1.50395	15.4381
Zfp330	1.50393	8.34389
Qtrt1	1.50269	4.55929
Tpd52	1.50045	13.0189
Tbxa2r	1.49948	1.78278
Chac2	1.49934	2.93808
Fbn2	1.499	1.48144
Tagln2	1.49517	23.5048
Gsr	1.49457	18.6621
Ptcd1	1.49421	1.74638
Dhx29	1.49259	4.09905
Gm16062	1.4918	2.31535
Palld	1.49137	7.95429
Fntb	1.48952	2.96202
Itga2b	1.48825	7.09383
Cep57l1	1.48786	3.45842
Stambpl1	1.48649	1.48144
Setd1a	1.48576	1.48574
Rabggta	1.48563	4.45412
Slc38a4	1.48439	2.15384
Bora	1.48202	2.31225
Ak2	1.48082	12.5675
D11Wsu47e	1.47954	2.84311
Prg4	1.47816	9.04515
Kpna2	1.47647	3.9218
Rad18	1.47644	1.28868
Fhl2	1.47571	5.77321
Wnt6	1.47345	0.294819
Vasp	1.47332	14.0742
Trim47	1.47282	11.7882
Atad3a	1.47119	5.77644
Zbtb43	1.47109	2.84923
C330018D20Rik	1.46922	4.40242
Rangap1	1.46654	7.01442
Maip1	1.4654	7.4826
Abhd5	1.4642	6.33569
Impdh1	1.46276	3.61299
Hmgn5	1.46263	4.65073
Irf7	1.46226	19.9968
Scx	1.46185	1.61153
Zfp27	1.46159	1.08996
Fam83g	1.46107	1.39253
Gm21814	1.46093	1.35474
Slc16a9	1.45805	0.713563
Ubqln4	1.45788	2.96766
Fam234a	1.45571	7.71401
Nckap5	1.45487	1.0613
Rabep2	1.45263	4.15959
Jpt2	1.45091	7.84165
Zbp1	1.4501	14.7914
Tfdp1	1.4499	7.62604
Pmvk	1.44986	5.70811
Myo1h	1.44949	1.48144
Mirg	1.44913	1.22425
Timp3	1.44883	22.647
Slc37a1	1.44547	1.04965
Gla	1.44426	2.35269
Mlf1	1.44308	1.98343
Fam45a	1.44215	7.74917
Eno1b	1.44214	3.37593
Ubxn2b	1.44167	3.51256
Igsf9	1.44123	1.18012
Tuba1c	1.44067	6.15066
Folr1	1.44025	14.5234
Sh3kbp1	1.43925	5.48
Zfp39	1.43904	0.962012
Tgfbi	1.43779	4.18858
Ncf2	1.43757	1.08996
Dnaaf2	1.43709	1.61153
Postn	1.43656	12.8763
P2rx4	1.436	5.3666
Golph3l	1.43442	5.06339
Susd4	1.43408	1.35122
Rexo2	1.43344	26.4509
2510017J16Rik	1.43334	0.00607953
Trim30a	1.43299	7.99754
Pus10	1.43227	2.8674
Arf6	1.43153	13.4496
Nrm	1.43146	4.00532
Chtf18	1.4314	1.22077
Nop16	1.43138	6.73605
Fam241a	1.43087	2.64377
Fut11	1.43001	6.95635
Cox10	1.42961	3.20334
Sec23a	1.4293	8.37855
Cyb5r1	1.42509	3.2315
Stx11	1.42443	5.19817
Brms1l	1.42163	4.44481
Ube2v2	1.42086	12.5799
Myo1e	1.4204	1.95519
Ints9	1.42039	3.81298
Drc3	1.42027	0.565797
Col8a2	1.41982	0.696876
Sh3bp5	1.4171	8.73941
Srm	1.41533	9.49498
Polg2	1.41518	1.15878
Bpnt1	1.41309	5.36231
Arid5a	1.41288	2.53587
Nudcd2	1.41273	13.1134
Praf2	1.40957	12.6558
Fam72a	1.40942	1.04384
Serpinh1	1.4094	36.5166
Aasdhppt	1.40595	9.67395
Srp19	1.40537	13.997
Tctn3	1.40085	1.85516
Zfp946	1.39996	1.71299
Fmn1	1.39807	1.95519
Slc39a11	1.39763	4.77003
Gm1976	1.39701	1.5298
Fbxo36	1.39571	3.04953
40787	1.3948	5.26893
Mrap	1.39432	2.28109
Srprb	1.394	7.36784
Rabepk	1.3928	7.44535
Osbpl3	1.3897	3.22777
Inhbb	1.38934	0.70018
Spon2	1.38923	15.5915
Uchl3	1.38899	12.2492
Slc35f6	1.38869	3.44154
Alg9	1.38865	4.05158
Ly6a	1.38763	12.1642
Comtd1	1.38758	5.90417
Nhej1	1.38748	3.43283
Ints14	1.38733	6.32132
Mest	1.38659	2.8095
Gbp4	1.38219	1.61924
Iqck	1.38119	0.582556
Wdr75	1.37973	4.96411
Cc2d1a	1.37897	3.59314
Mum1l1	1.37879	3.60397
Krt7	1.37822	12.4537
Zfp595	1.37547	1.28557
Rarb	1.37502	1.09339
Grin2d	1.37478	0.958623
Fam122b	1.37379	1.70772
Gipc2	1.37368	4.23544
Snap23	1.37275	10.1883
Plxna3	1.3727	0.700152
Maged2	1.37241	20.8607
Sparc	1.37137	29.5316
Eef1akmt4	1.37134	7.50072
Prelid3b	1.36871	9.30862
Exoc6b	1.36826	5.02884
Wnt4	1.36198	10.0146
Slc39a10	1.36149	4.79423
Nnat	1.36014	3.77658
Map1b	1.35912	10.3607
Ckap4	1.35862	15.1104
Rab32	1.35654	4.83518
Fbxo5	1.35471	1.61063
Gm47689	1.35459	1.08996
Zfp287	1.35418	0.958623
Ubl4a	1.35331	12.5824
2700049A03Rik	1.3522	2.52691
Nfyb	1.35135	7.18824
Gars	1.35058	11.433
Prdx1	1.35041	38.5065
Abcb1a	1.35037	2.2929
Apol10b	1.34929	1.05156
1700102H20Rik	1.34814	0.565797
Pip5k1b	1.34783	0.829918
Acer3	1.34473	5.90943
Pdlim7	1.34324	12.9644
Ap3s2	1.34273	8.42791
Mrps22	1.34265	4.22044
Eif6	1.34231	18.6007
Yaf2	1.34037	12.281
Slx4ip	1.34033	1.74158
Cd320	1.33968	3.86534
Car2	1.33906	2.06723
Hrh1	1.33891	0.826583
Mrgprf	1.33866	5.81278
Il4ra	1.33719	6.67028
Cstb	1.33712	24.0489
Ephx4	1.33628	0.833258
Acot6	1.33477	1.74158
Taf13	1.33453	8.88837
Gbp9	1.33358	3.75512
Ammecr1	1.33287	7.68807
Slc25a5	1.3325	20.7319
Myl4	1.33239	2.59573
Sema3a	1.33222	0.935364
Gipc1	1.3318	10.5488
Alcam	1.33029	1.92448
Ssr2	1.32974	22.9849
Washc5	1.3284	4.38902
Fbxl21	1.32794	0.294819
Ptrh1	1.32775	4.97973
Gmnn	1.32737	7.0359
Siah2	1.32665	3.01606
Selenoh	1.32624	9.17402
Noc2l	1.32382	5.76706
Col5a3	1.32174	4.49126
Gcat	1.31966	4.06993
Zfp930	1.31931	1.68681
Elk3	1.31879	2.2481
Pfn1	1.31657	37.7784
Donson	1.31645	3.17918
Spata5	1.31633	2.26305
Rnf121	1.31587	6.63312
A130051J06Rik	1.31522	2.4243
Atad2b	1.31509	3.14523
Gm14325	1.31413	1.59635
Dhcr7	1.31389	2.70925
Shcbp1	1.31384	3.50795
Lyrm1	1.31349	3.58549
Pmf1	1.31123	4.3122
Cdc42se1	1.31028	8.15356
Tnfaip8l3	1.30998	0.565797
Gins1	1.30943	1.50828
6330418K02Rik	1.30928	3.75867
Apobec3	1.30768	6.78867
Cnp	1.30641	5.16851
Zfp593	1.3045	5.63822
Nufip1	1.30397	4.44365
Map3k11	1.30362	3.08798
Misp	1.30245	0.958623
Plpp2	1.30231	5.96168
Cyp1b1	1.30148	1.38145
Spats2	1.30092	4.30271
Tnfaip3	1.30051	2.27305
Fbxo17	1.29993	3.19281
Acot4	1.29833	1.74158
Eef1akmt1	1.29802	7.09688
St3gal1	1.29737	10.6118
B4galt6	1.29678	7.77208
Tmem177	1.29503	2.44764
Slc6a9	1.29479	1.17031
Mfsd4b3	1.29444	0.962012
Bysl	1.29412	5.85732
Mgarp	1.29388	1.22425
Nudt17	1.29281	5.08726
Ptn	1.29113	7.12053
Tmem199	1.29111	4.68165
Helb	1.29089	1.49699
Yrdc	1.29079	5.70869
Mob3a	1.29065	3.48944
H2afz	1.28988	16.7329
Pla2g4a	1.28779	6.77334
Slc20a2	1.28722	3.6272
Cdr2l	1.28687	6.82899
Gm10320	1.28655	2.09147
Dclre1c	1.2829	0.694804
Hist1h2ak	1.28268	1.41968
Wars2	1.28137	2.9466
Smcr8	1.27906	1.15552
Psmc3ip	1.27723	1.91614
Hmox1	1.27704	4.27619
Hspd1	1.2762	12.4997
Ube2g2	1.276	7.62336
Ctxn1	1.27558	8.47261
Mrpl36	1.27475	10.1853
Mtfmt	1.27465	3.60857
Nespas	1.27395	1.08996
Gm5141	1.27325	1.22425
Cst9	1.27197	5.48175
Dpysl3	1.27182	5.53384
Ntmt1	1.27182	9.38862
Mb21d1	1.27138	1.08996
Setdb2	1.27089	2.60171
Rsad2	1.27015	5.39055
Trmt10a	1.26966	3.04217
Ube2w	1.26897	10.9944
Eif1ax	1.26727	15.0213
Gm6563	1.26597	3.3804
Mad1l1	1.26568	2.75522
Gpr39	1.26545	6.31011
Itga6	1.26387	7.25593
Arpc5	1.26333	21.1728
Fgd6	1.26083	0.696876
Enoph1	1.26012	4.12621
S100a3	1.2601	3.53965
Col27a1	1.25873	1.57646
Fam136a	1.25853	12.0756
Pphln1	1.25738	3.80501
Eif2b1	1.25737	6.28722
Ap3s1	1.25586	18.5611
Acot7	1.25522	10.6332
Mis12	1.25461	3.8982
Dcakd	1.25446	8.25826
Sh3bgrl3	1.25347	20.9798
Avil	1.25252	0.0112911
Gys1	1.25047	2.05078
Thoc6	1.25039	5.92272
Mrgbp	1.24987	4.38611
Wnk4	1.24976	1.51737
Coq4	1.2496	4.42541
Txnl4a	1.24878	11.3839
Slc35c1	1.24597	4.74817
Mtap	1.24568	6.91486
M1ap	1.24532	0.562602
Iqcc	1.24306	3.94495
Gtpbp8	1.2419	4.34184
Col12a1	1.24187	2.55935
AI429214	1.24007	0.696876
Vmp1	1.23749	11.1983
B230208H11Rik	1.23738	0.565797
Mmp3	1.23731	2.3493
Pqlc2	1.23636	2.89986
Eif2s1	1.23628	13.132
Topbp1	1.23476	4.55399
Gm10031	1.23291	1.04095
Mlx	1.23273	5.43478
Dynlt1a	1.23197	5.33913
Slc16a6	1.23111	2.13402
BC022687	1.23074	5.40065
Chaf1b	1.22957	3.8958
Gm9484	1.22937	0.151439
Pdk3	1.22798	6.41743
Etohd2	1.22775	0.344131
Mrm3	1.22692	2.59185
Gfod2	1.22632	3.07551
Cdc25a	1.22579	2.9466
Epcam	1.22402	0.344131
Rfc4	1.22399	4.36869
Casp7	1.22365	4.09866
Dph5	1.22315	4.5269
Hfe	1.22144	4.36127
Acp5	1.22076	12.0933
Pfkfb2	1.22004	0.696876
Btbd19	1.21986	1.88437
Npat	1.21954	1.58307
Ccdc167	1.21941	7.03504
Col4a1	1.21866	11.4068
Gm49336	1.21541	3.65035
Eloc	1.21515	17.4807
Pi4k2b	1.21439	4.29747
Hif1an	1.21425	2.55723
Krt8	1.21387	16.1216
Wdr5b	1.21301	1.3982
Nupr1	1.21151	7.09805
Dnah1	1.21106	0.696876
Bdh2	1.20911	2.67868
Ifit1	1.20815	8.49561
Pole	1.20672	1.48144
AI427809	1.20661	2.40791
2610524H06Rik	1.20574	7.60669
Dtymk	1.20552	9.89577
Zbtb41	1.20522	2.03435
Unc5b	1.20507	4.95725
Creg1	1.20491	20.1081
Paqr3	1.2046	0.559415
Npl	1.2042	1.143
Map4k1	1.20416	0.00853496
Zwint	1.20407	10.4177
Slc26a2	1.20384	2.36389
Aldh1a3	1.20363	1.40739
Hmgn2	1.20302	10.1008
Tpd52l1	1.20217	1.79002
Shpk	1.20214	0.562602
Tenm3	1.20192	1.58307
Eno1	1.2013	18.3811
Zfp174	1.20008	0.426746
Dpp3	1.19955	10.6032
Uchl5	1.19945	6.78699
Arl6ip6	1.19808	4.78053
Msc	1.19697	0.151439
Prr13	1.19629	21.2974
Zfp973	1.19604	0.231653
Leprotl1	1.19594	12.9705
Setdb1	1.19314	2.11966
Gm9949	1.19292	0.297793
Snai2	1.1929	1.05256
Tkfc	1.19289	6.36356
Lgals3	1.19224	13.0571
Sh3glb2	1.19125	11.1293
Mylpf	1.19078	1.88759
Mios	1.18957	2.4369
Shkbp1	1.18901	5.73947
Dcaf1	1.18887	2.24347
Brix1	1.18754	8.11062
Prmt1	1.1851	13.1873
Msn	1.18375	9.45449
Nudt10	1.18247	1.03602
Gm26771	1.18149	0.426746
4930522L14Rik	1.18118	2.24347
Scin	1.18038	2.81215
Tmem33	1.1782	10.9919
Cpn1	1.17766	5.78122
Ptrhd1	1.17605	6.7264
Zfp605	1.17594	1.57929
Gpn2	1.17592	3.27508
Dnmt1	1.17549	3.69145
Nolc1	1.17478	6.5245
Calcb	1.17388	1.65885
Veph1	1.17346	0.196423
Sec13	1.17307	12.2988
Lgals9	1.17305	14.1803
0610010F05Rik	1.17035	4.74793
Ttll5	1.16976	2.14116
Pcna	1.1692	5.14308
4930579G24Rik	1.16902	0.569629
Erh	1.1681	14.3107
Sco1	1.16693	3.05042
Tmem183a	1.16679	6.40436
9130023H24Rik	1.16601	0.962012
Ifitm6	1.16587	0.151439
Ftsj3	1.16546	4.66305
Jpt1	1.16537	20.2115
Sdc1	1.1647	8.21175
Apool	1.16274	5.67566
Pycard	1.16182	7.66241
Loxl2	1.16168	13.778
Tmem101	1.15879	4.40787
Usp37	1.15847	2.12506
Gm42517	1.15746	0.00853496
Nhp2	1.15708	8.94289
Gfpt2	1.15681	8.16938
Tmem167	1.15618	18.7166
Adamts9	1.15595	3.43798
38596	1.15477	0.565797
Kctd5	1.15474	7.23402
Tgfbr1	1.15429	5.0092
Ufm1	1.15365	11.2936
Recql	1.15204	2.29994
Dgkh	1.15095	0.696876
Serpinb1a	1.15056	16.0652
Scaf4	1.14974	1.50512
Tmem29	1.14925	5.70315
Hes6	1.14914	7.00825
Rai14	1.14739	5.02403
Snrpd1	1.14703	10.9605
Cdk2ap1	1.14566	6.39012
Parp3	1.14562	6.95794
2310030G06Rik	1.1456	7.51151
Dynlrb2	1.14552	0.565797
Rrad	1.14552	2.90572
Gng12	1.14502	14.4652
Gm13305	1.14487	2.08111
Cmas	1.14427	13.4985
Nqo1	1.14385	2.36702
Phldb2	1.1434	5.92282
Zfp511	1.1434	5.50684
Tpra1	1.1433	3.8203
Cct3	1.14273	11.8417
Cox11	1.14253	5.18738
Gm26615	1.14253	0.693608
Zfp14	1.14182	0.958623
Scyl3	1.14012	1.69487
Mief2	1.13971	0.562734
Fzr1	1.13842	7.01031
Ap2m1	1.13822	21.532
Zdhhc12	1.13649	7.7049
Snx7	1.13623	8.89983
Smurf1	1.13611	1.70565
Rtp4	1.13607	13.2633
Nxph4	1.13567	0.288901
H2-Q10	1.13558	0.426746
Oas2	1.1349	2.1099
Dclk1	1.13444	6.12247
Cda	1.13418	1.42585
Pgm3	1.13409	7.11746
Lca5l	1.13404	1.61153
Itgb8	1.13364	5.1518
Isg15	1.13305	14.958
Platr25	1.13273	1.42276
Ddit4l	1.13211	7.33359
Lrrc20	1.13139	1.97887
Dock3	1.13094	1.64334
Fam185a	1.13063	0.696876
Asap2	1.13038	2.34261
Zfp706	1.12983	16.7485
Clic1	1.12974	26.7154
Oxsr1	1.12931	3.66657
Col5a2	1.12866	10.9962
Gba	1.12806	8.28721
Tex30	1.12688	4.24433
3110040N11Rik	1.12594	5.203
Cdc42se2	1.12428	6.02729
Tpm4	1.12415	20.6146
Arhgap45	1.12411	5.40534
Psat1	1.12337	5.07358
Acbd3	1.12307	6.13989
Haus4	1.12086	2.74184
Zc4h2	1.11979	1.2722
Utp4	1.11886	4.07883
Ciapin1	1.11886	5.55735
Psmd14	1.11878	10.8647
Abracl	1.11797	16.0238
Mak16	1.11701	4.74997
Mrpl45	1.1169	6.60957
Radil	1.11685	0.288901
Msantd3	1.11676	2.69481
Cdkl3	1.11575	1.02572
Got1	1.11536	7.54403
Zfp52	1.11529	1.24533
Ppif	1.11516	2.68443
Stx18	1.11454	6.00685
Ifi44	1.11393	7.12111
Cyp7b1	1.11363	2.65283
Dynll1	1.11362	26.5821
Uhrf1bp1	1.11342	0.684106
Fam96b	1.11304	10.2163
Pggt1b	1.11262	2.6047
Cd276	1.11249	1.51737
Lap3	1.11134	5.51058
Rnh1	1.11123	16.0726
Elp2	1.11073	5.9564
Ropn1l	1.11002	0.60598
Apex1	1.10935	8.51406
Syn3	1.10924	0.826583
Samd4	1.1089	4.38225
Arpc1b	1.10839	28.2356
Tspan6	1.10689	5.63066
Car5b	1.10629	1.88115
Yipf5	1.10625	9.65052
Faim	1.10466	7.22738
Inafm2	1.10447	1.16142
Mkl1	1.10429	1.26221
Aen	1.10427	7.92898
Nop58	1.10392	8.17682
Pole4	1.10372	8.48796
Ccdc97	1.10337	2.55179
Aco1	1.10287	5.30658
Rsph3a	1.10259	1.45754
2610020C07Rik	1.10255	0.700152
Tpm1	1.10202	18.5967
Panx1	1.10133	5.3976
Smyd5	1.10089	3.82805
Fkbp10	1.10005	8.8994
Ak6	1.10004	7.73706
Pgam5	1.09977	4.44976
Capg	1.0997	9.69742
Ddx19b	1.09882	0.840614
Olfml3	1.09771	8.56844
Cryzl2	1.09669	2.94399
Rom1	1.09662	2.43091
Lzic	1.0965	4.10792
Commd2	1.09548	9.00556
Prim2	1.09516	1.70993
Abcf2	1.09494	6.70872
Rfc5	1.09491	4.92388
Pomc	1.09456	2.13402
Upp1	1.09428	0.291856
Mks1	1.09357	1.3649
Card14	1.09346	0.00853496
Dynlt1f	1.09344	5.10646
Pdia6	1.09339	21.4182
Anln	1.09327	2.56937
Tap1	1.09227	4.44028
Bop1	1.0921	4.99782
F8a	1.09157	3.05557
Akap1	1.09067	1.89757
Rcan1	1.0904	3.19212
Pold1	1.0898	3.60179
Akr1c13	1.08846	3.50004
Pmaip1	1.08831	3.37452
Yars	1.08813	4.59241
Anp32a	1.08793	20.1819
Noc4l	1.08743	4.6397
Gm43848	1.08718	0.562602
Nubp1	1.08686	7.9346
2810408A11Rik	1.08629	1.51427
Bax	1.08594	11.9248
Gm10076	1.08455	14.3806
Slc25a32	1.08441	1.56988
Capn2	1.08392	10.8398
Fam43a	1.08292	0.693608
Ppp2r5b	1.0824	8.90559
Mycn	1.08229	1.86619
Sec61b	1.0808	20.9279
Tbcd	1.08036	3.99142
Lypla1	1.08008	8.07609
Rcc2	1.07525	3.9661
Lmf1	1.07511	4.56885
Ctps	1.07507	5.63439
Ap1s1	1.0743	10.715
Peg3	1.07369	4.45723
Gnl3	1.07364	5.92474
Lmo4	1.07352	12.5884
Kiss1r	1.07338	0.151439
Syncrip	1.07335	8.6042
Zfp551	1.07309	0.816005
Taldo1	1.07276	14.9439
Tmem88	1.0727	2.7095
1810062O18Rik	1.07151	0.429838
Cops7b	1.07113	1.90511
Nfxl1	1.0706	2.15259
Agk	1.07056	4.02689
Pola1	1.07054	1.46724
Polr1b	1.07033	1.67498
Akap10	1.07002	2.42819
Nup85	1.06991	3.41642
Aoc3	1.06946	0.426746
Txnrd1	1.06924	5.20797
Slc15a4	1.06855	1.79077
H2-T22	1.06693	10.1285
Wee1	1.06624	1.74222
Mdp1	1.06609	7.25437
Lsm2	1.06595	7.51051
Eda2r	1.06579	1.78866
Incenp	1.06455	1.64626
Cox5a	1.06356	17.7674
Srsf7	1.06286	9.40848
Zwilch	1.06181	0.932519
Phykpl	1.06109	2.87972
Rab33a	1.06077	0.793965
Prdx2	1.06064	23.9783
Immp2l	1.06025	2.49764
Pole2	1.05961	2.06608
Dut	1.05867	6.24692
Apbb1ip	1.05866	2.52126
Gas2	1.0579	0.429838
Cenpw	1.05683	4.38988
H2afx	1.05675	5.59103
Ube2l3	1.05627	15.0855
Gda	1.05371	7.2687
Ptcd2	1.05321	4.05409
Rpp40	1.05271	2.9466
Galnt10	1.05244	1.7805
Impa2	1.05219	4.79423
Tldc1	1.05197	1.47174
Ckmt1	1.05135	4.56503
Hhipl1	1.05036	0.693608
Cib1	1.0495	10.1381
Ccdc127	1.0485	5.28002
Hsd17b12	1.04842	8.76875
Tyw3	1.04827	1.39515
Uprt	1.04805	1.22077
Qsox1	1.04794	6.04841
Armc9	1.04784	2.2179
Efna2	1.04708	5.29282
Ispd	1.04657	0.918357
Dram1	1.04611	2.12408
Traf5	1.04588	4.85258
4932422M17Rik	1.04539	0.426746
Tmem69	1.04476	1.14025
Aimp2	1.04381	6.72772
Ldlrad4	1.04377	3.81808
Spaca1	1.04376	1.15847
Ppic	1.04298	14.9762
Bzw1	1.04269	15.1385
Slc30a7	1.04265	5.35613
Unc13b	1.04224	3.54087
Psmd1	1.04206	10.0861
Bid	1.042	3.00719
Thumpd3	1.03704	6.21493
Cyp20a1	1.03673	5.64996
N4bp3	1.03667	1.79172
Zfp157	1.03659	1.8105
Gldc	1.03653	0.151439
Psmb2	1.03602	21.6065
2410004B18Rik	1.03502	6.67359
Rras2	1.03476	10.0076
Neto2	1.03295	0.461153
Nol8	1.0329	2.64116
2610021A01Rik	1.03244	0.915536
Aplp1	1.03167	11.0491
Fam173b	1.03138	5.12543
Coq2	1.03122	5.86194
Med8	1.03104	13.4471
Efhd2	1.03095	6.30952
Slc41a3	1.02954	2.59936
Actr3	1.02884	11.2417
Uggt1	1.02753	4.37553
Ddx56	1.02692	6.27771
Mblac1	1.0262	1.59897
Pdhx	1.02596	2.48646
Proca1	1.0256	0.693608
Ostc	1.02532	18.018
Gar1	1.02498	5.42024
Med7	1.02466	6.53067
Zbed5	1.02445	1.88982
Gnl2	1.0244	7.24229
Eif2b3	1.02402	4.39292
Zeb2os	1.02191	1.46895
Arf4	1.02179	22.4645
Tmem189	1.0205	2.72933
Nfil3	1.02001	3.8597
Gpt2	1.01977	1.04713
Poc1a	1.01964	1.23193
Idh1	1.01961	9.37851
Camk1d	1.0193	0.693608
Naa20	1.01897	10.448
Ppp1r18	1.0188	6.38882
Hspa5	1.01862	20.5979
Tcirg1	1.01809	4.87836
Nol3	1.01809	3.14456
Dus1l	1.01792	4.69644
Rrp1b	1.01735	3.09405
Ofd1	1.01666	2.56682
Riox2	1.01644	3.73152
Cd63	1.0141	21.207
Zfp677	1.01385	1.36216
Ric8b	1.01291	1.5935
Cep41	1.01262	1.59066
Slk	1.0124	6.25682
Pvt1	1.0122	0.962012
Mmp14	1.01188	9.24968
Paqr4	1.01137	1.24729
Pola2	1.01119	3.07336
Adrb1	1.01096	0.742111
Mettl21a	1.01084	3.39764
Syt12	1.01019	1.08996
Ruvbl1	1.00901	6.68958
AC146911.1	1.00866	0.151439
Nemp1	1.00755	1.36295
Dars	1.00691	7.86906
Fdft1	1.00676	5.44334
Snrpa1	1.00655	7.57005
Gm42726	1.00654	1.22077
Taf4b	1.00625	0.826583
Actl6a	1.00568	5.43096
Hist1h2ae	1.00519	2.23075
Irak2	1.00424	1.23739
Gfer	1.00359	5.60667
Mettl16	1.00326	5.70735
Zc3hc1	1.0032	3.92877
Hsp90b1	1.00286	15.3309
Cd9	1.00131	15.4107
Nelfe	1.00074	6.09209
Gas7	1.0004	2.83308
Wdr4	1.00017	3.58425
Pbdc1	0.999816	7.53174
Ptpn18	0.999791	1.04003
Sri	0.999697	17.7595
Hspb2	0.998965	5.54463
Rab19	0.998908	2.08743
Cenpq	0.9985	2.13546
Zfp64	0.998321	3.31105
Pfdn4	0.997868	7.62528
Map2k5	0.997793	5.2499
Zfp738	0.997057	2.26797
Ell2	0.99676	2.44948
Psmb3	0.995879	14.9295
Ssna1	0.995526	8.85518
K230015D01Rik	0.99551	1.22077
Pcdh11x	0.995463	0.288901
Dap	0.995356	10.5786
Mapk6	0.994398	4.58849
Zfp354b	0.99382	0.14868
Snx15	0.993802	4.33444
Zfp7	0.993541	1.64019
Mrpl57	0.993475	8.54721
Tnfsf9	0.992147	1.27354
Rita1	0.991515	2.88048
Faf1	0.991354	7.16149
Ly96	0.991351	5.44777
Clu	0.990878	2.55569
Nudt14	0.989223	5.82954
Vamp3	0.989054	9.98212
Hmgn3	0.988965	10.182
Heatr3	0.988907	1.97896
Tmem19	0.988379	5.17738
Slbp	0.98815	5.24496
Marcks	0.987873	8.71922
Nars2	0.986467	1.96843
Rhbdd1	0.98643	1.64413
Stoml2	0.985561	9.03245
Csdc2	0.984553	1.26221
Ccdc62	0.98455	0.926842
Gca	0.98447	2.7205
Lxn	0.984252	8.07933
Cops5	0.984131	7.96662
Npas3	0.983979	0.820598
Cisd2	0.983221	9.31457
Mrps28	0.981852	8.25157
Psmd7	0.981679	12.0142
Rfc2	0.981628	8.45365
Eif5a	0.980881	20.1945
Tmem267	0.980079	2.8707
Plod1	0.979074	6.25974
Pde3b	0.978626	2.91646
Traf2	0.977946	6.64453
Rasef	0.977926	0.426746
Rab27b	0.977904	5.3617
Psmd5	0.977687	6.69106
Gmps	0.976708	9.24387
Rab11a	0.976267	16.2777
Psmb8	0.976215	10.1721
Ddx59	0.976176	1.90229
Xrcc5	0.976137	5.75553
Eif4e	0.975921	7.58823
Glmn	0.975764	2.78191
Gpr135	0.975704	0.681443
Slc18b1	0.975535	1.77793
Serf1	0.975355	7.53608
Gspt1	0.975229	10.3504
Opa3	0.975184	3.43871
Nr2c2ap	0.975126	4.30881
Nme6	0.974601	3.91958
AW209491	0.973422	4.09531
Fam69c	0.972502	0.196423
Hes1	0.972152	9.63348
Trit1	0.971873	2.66168
Lgmn	0.971432	8.9809
1700007K13Rik	0.970154	0.458678
Tspan12	0.970012	0.705307
D930048N14Rik	0.969783	0.426746
Map3k8	0.969618	2.94475
Mrps10	0.96926	7.6212
Morf4l2	0.968423	16.3215
Avpi1	0.968334	6.48617
Zfp53	0.967567	2.8457
Specc1	0.967315	3.63332
Tlcd2	0.967269	3.92137
Smyd4	0.967219	2.03383
Zfpl1	0.967136	7.02089
Psmd6	0.966888	9.45522
Pdk4	0.96682	0.151439
Nim1k	0.966212	1.15257
Eif3b	0.965442	9.90485
Hax1	0.96488	6.05632
Dhrs13	0.964842	3.0674
Cbfb	0.96317	5.10448
Aars	0.962669	7.33332
Mettl1	0.961845	4.69821
Pycr2	0.96145	7.73314
Rnf26	0.961178	4.32018
Hacd2	0.960796	5.72331
Riiad1	0.95948	2.31422
Cmpk1	0.959269	9.37959
Ccdc138	0.958943	1.52669
Fancb	0.958851	0.826583
Tubg2	0.958821	0.693608
Wdr1	0.958582	11.7036
Fam96a	0.957315	10.576
Thyn1	0.957029	4.62571
Ythdc2	0.956799	2.09576
Acly	0.956561	4.20389
Dctpp1	0.9564	5.39546
Mrps25	0.956191	6.24881
Scd2	0.955822	4.49821
Pgs1	0.955635	4.7304
Snrnp40	0.955512	6.44081
Scamp3	0.955268	8.85048
Pde7a	0.954314	1.55413
Rasgrf2	0.953223	1.35122
Cstf1	0.95294	2.38469
Ube2s	0.952828	9.16137
Rpap3	0.952415	8.84925
Rabif	0.952069	5.69999
Lekr1	0.951885	1.04239
Ints4	0.950546	3.51152
Rab15	0.950255	0.423662
Pipox	0.949764	0.288901
Txnl4b	0.948988	1.51427
Cstf3	0.94858	2.3486
Gm48933	0.947557	0.958623
Erg28	0.946778	6.23792
Poll	0.946583	1.02058
Spire2	0.946255	4.7679
Manf	0.946234	12.5274
Fam118b	0.946223	3.58717
Arl16	0.945104	4.03627
Tbcb	0.944365	11.6116
Rars2	0.944225	6.09678
Acy3	0.943608	2.60646
Taf2	0.94322	3.0825
Srgap1	0.943117	1.49136
Tmem51	0.942865	3.73902
Rhoc	0.94278	13.9741
Uba2	0.942613	7.68516
Thy1	0.942412	4.73924
Orc6	0.941443	4.53309
Gmppb	0.941256	8.5591
Lrp11	0.94086	1.01036
Pdgfc	0.93927	0.958623
Nmd3	0.938582	5.90284
Mrpl54	0.938271	10.5299
Ube2m	0.938062	7.28681
Ppih	0.937497	4.11816
Dcun1d5	0.936713	11.8893
Cmtm7	0.936643	10.5177
Eif4a1	0.936529	20.6711
Fam35a	0.935758	1.65741
Stam	0.935608	1.99392
Plekhg1	0.935431	0.288901
Gm15234	0.935221	0.44883
Sdf2l1	0.935074	8.90385
Higd1a	0.934506	11.7381
Prdx4	0.934083	12.3273
Katnb1	0.933397	2.94358
Nupl2	0.933216	1.45269
Ruvbl2	0.932701	4.05355
Tmem185b	0.932596	4.13502
Edem1	0.932574	5.72867
Crcp	0.932489	3.40635
Dxo	0.931869	4.42013
Klhl20	0.931673	1.1536
Marcksl1	0.931566	8.15613
Ncapd3	0.931105	2.12124
Zbtb11	0.930519	1.18349
AI606181	0.929535	0.227284
Ube2i	0.928695	13.8966
Nt5m	0.928667	3.52519
Gm26637	0.928554	0.288901
Oma1	0.928011	3.61809
Plekhf1	0.927953	4.68843
C2cd2l	0.927907	1.48144
Nfe2l3	0.927787	5.16554
Ddias	0.926869	0.958623
Wdr70	0.926197	4.49718
Reep4	0.925788	2.90874
Snx3	0.925228	15.5141
Fbxo30	0.925194	1.86926
Ccdc25	0.924959	6.49902
Rpgr	0.924912	1.27654
Tmem191c	0.924406	0.696876
Mtx2	0.923815	10.8395
Wfdc1	0.92368	7.23982
Emp3	0.923432	20.0362
Gtf2e2	0.923055	7.80791
Zfp607a	0.923053	0.693608
Pigw	0.922789	1.79562
Haus6	0.921471	1.68681
Naa50	0.921097	5.57411
Mrpl39	0.920782	4.65495
Rundc3a	0.920558	0.912719
Sfrp2	0.919638	8.32312
Tfg	0.91916	9.57914
Zmat3	0.918981	3.60594
Utp6	0.91756	2.93644
Psmc4	0.917186	12.9556
Mrpl37	0.917155	4.79976
Scara3	0.915547	2.23801
Gm8186	0.915068	5.9838
Pck2	0.9148	4.18681
Brd3os	0.914562	1.12711
Med27	0.914332	4.03594
Zfp948	0.913805	3.68874
Ube2e3	0.913747	9.68676
Gm20707	0.913733	0.696876
Tmem110	0.913167	3.81259
Mad2l1bp	0.912484	3.31912
Copz1	0.91156	9.95741
Tmem62	0.910845	4.06591
Cbr4	0.910481	2.9515
Cpne8	0.910456	7.5373
Tmed2	0.910313	18.7057
Gm16230	0.910247	0.151439
Snrnp25	0.909258	3.37918
Uck2	0.909035	5.07079
4930524J08Rik	0.907851	0.958623
Spcs1	0.907793	19.5794
Cldn34c1	0.907201	1.48541
Unc13d	0.907153	0.693608
Mtmr14	0.906185	2.63223
Hacd1	0.90588	7.76756
Metrnl	0.905359	7.84522
Tspan15	0.905223	5.2887
Man1c1	0.905147	4.16444
Nasp	0.905105	6.87119
Gas2l3	0.904951	1.08996
Efemp2	0.903687	9.68522
Gtf2ird1	0.90301	3.4392
Slc16a11	0.902743	1.40133
Col4a2	0.902342	5.89696
Vdac3	0.902142	14.8419
Edc4	0.901162	2.41794
Hat1	0.900781	3.20083
Tax1bp3	0.899578	14.7571
Mre11a	0.89888	4.15807
Prmt7	0.897861	4.12225
Ccnd1	0.897089	6.2495
Smim3	0.896392	5.01815
Tmem238	0.895683	6.94221
Gm5547	0.895517	0.423662
Ufsp1	0.895399	1.93857
Pou4f1	0.89518	0.196423
Ccpg1os	0.895062	3.34024
Hbs1l	0.894774	5.77971
Pin1	0.894469	11.4
Iffo2	0.893951	0.693608
Prep	0.893944	3.12771
Mcm7	0.893671	3.52917
Tipin	0.892993	4.87117
Mrpl16	0.892908	6.14619
Dpy30	0.892763	7.43935
Bet1	0.892444	8.59495
Pex14	0.892328	4.14456
Pdia4	0.892192	12.2
Hccs	0.891962	3.88619
Abcg2	0.891849	6.02865
Tarbp2	0.891529	4.23728
Syngr2	0.890253	13.3641
Tcf19	0.890211	1.85271
Srp54c	0.890159	0.562602
Krtcap3	0.889124	5.14825
Strip2	0.888792	0.562602
Serpinb8	0.888613	2.42711
Bcl3	0.888474	6.10439
Hspa2	0.888422	5.95864
Hars	0.887906	8.52986
Abhd13	0.887307	3.02198
Tor1a	0.88716	5.26501
Sec11a	0.886387	13.3332
Txnl1	0.886199	9.14842
Tmem104	0.885532	1.68179
Gm13431	0.885273	5.40505
Clic5	0.884949	0.826583
Prpf4	0.884358	1.99392
Kras	0.883828	6.89593
Ak1	0.883747	7.49213
Pafah1b3	0.883291	6.12515
Col1a1	0.883092	13.8279
Glo1	0.883091	9.62101
Serp1	0.882699	11.9823
Abi3	0.882482	0.288901
Ppp1r7	0.882334	6.34669
Sec22a	0.88225	5.61562
Pgk1	0.882098	8.11395
Hspa9	0.882017	7.88009
Slc44a3	0.881861	0.564492
Prdm16	0.881785	0.151439
Kcne1l	0.881409	0.288901
1700003F12Rik	0.880016	0.288901
Miga2	0.879138	2.09294
Mgat2	0.877908	11.1319
Aldh18a1	0.877729	3.58173
Hook1	0.877387	0.953157
Gemin2	0.875229	3.04747
Gspt2	0.874846	0.918357
Polr3k	0.87355	7.91085
Snx6	0.873235	10.2193
Gm16118	0.87282	0.426746
Fbxo42	0.870918	1.25975
Orc2	0.870107	3.1177
Mrpl20	0.869947	8.96222
Cnih4	0.869528	12.0876
Lefty2	0.868863	1.45855
Runx2	0.868081	0.562602
Tspan32	0.867848	1.02315
Arfgap3	0.867574	2.14151
Cd3eap	0.867564	5.07079
Bcap31	0.867333	11.1892
Atp6v1d	0.866614	7.90975
Txn1	0.866602	14.8818
Gpr137b	0.865659	2.48855
Rusc1	0.865238	2.98293
Farsa	0.865042	5.7146
Nab1	0.864775	6.03416
Upk1b	0.863858	14.7907
Sema3b	0.863656	1.91127
Trim46	0.863597	0.426746
Itm2a	0.863039	3.54038
Atp2b4	0.862639	3.64394
Ccdc136	0.862609	2.76497
Ccm2	0.860964	5.76135
Gm20498	0.860457	1.03059
Lrrc42	0.860278	5.4186
Pop4	0.860141	4.52023
Mrps18c	0.859761	9.14298
Ube2n	0.859633	12.5256
Ubfd1	0.859006	6.48349
Gm28557	0.858722	0.565797
Foxred1	0.858402	1.67677
Gk	0.858264	1.01291
Slc35b2	0.858125	8.2445
Bak1	0.857275	6.75814
Tsen15	0.857254	4.15164
Prss16	0.857041	1.08996
Tmed1	0.856776	8.8285
Nol11	0.856327	3.31669
Vma21	0.85616	6.16999
Itgb4	0.855717	1.18404
Dhx35	0.854703	0.826583
Vps29	0.854318	13.34
Nradd	0.853433	4.67146
Phlpp1	0.853362	0.813185
Psme3	0.853047	5.5906
Tuba4a	0.852299	2.93293
Gclm	0.852298	6.49581
Nup37	0.85185	3.46067
Crybg1	0.851564	1.04636
Hnrnpk	0.851499	18.2321
Rnf113a2	0.851468	3.02045
Mtmr2	0.851276	3.59596
Msl3l2	0.851219	2.56242
Fam20c	0.850973	3.28975
Ppm1d	0.85047	1.6614
Tspan17	0.849901	5.63262
Mcu	0.849878	4.79085
Fam212a	0.84924	1.76695
Nif3l1	0.848589	4.59494
Acads	0.848482	5.89671
Cdk4	0.848245	10.1797
Fpgt	0.84805	1.44576
Mad2l2	0.8472	3.18217
Abtb2	0.846318	0.426746
Cdc34	0.845946	5.29214
Itga5	0.845755	2.54077
Mydgf	0.844715	12.408
Baz1a	0.844484	4.1634
Tor1aip2	0.843946	5.23275
Trp53rkb	0.842932	2.43422
Mars	0.842406	3.98261
Aspscr1	0.842004	7.4823
Mrto4	0.841759	4.92348
0610009B22Rik	0.840403	6.31874
Prim1	0.839868	2.09488
Psmd2	0.839578	8.91273
Alg13	0.839145	2.0282
Psma7	0.839054	19.0811
Nup107	0.838021	1.66007
Tmem192	0.837505	5.52893
Thbs1	0.83742	5.77649
Iigp1	0.836757	5.40344
Timm8a1	0.836498	3.71144
Exosc3	0.836389	4.44567
Ttc21b	0.836316	1.89994
Hspa14	0.836313	4.96414
Zfp275	0.836173	1.91392
Strap	0.835127	6.13596
Fbxo27	0.83488	0.151439
Bdh1	0.834522	1.33262
Nsun2	0.83447	5.10303
Stt3a	0.834346	14.267
Tspo	0.834196	22.3251
Nat2	0.83363	1.94373
Prkrip1	0.833536	4.1303
Rpap2	0.833225	2.2585
Tm2d1	0.832499	7.33091
Psme2b	0.832018	2.91244
Eif2ak3	0.831524	1.57779
Mpnd	0.831325	4.90908
Hdac10	0.831132	1.77173
Casp8	0.830574	6.30195
Psma1	0.830266	12.3148
Trim59	0.830212	4.30947
Pdcd10	0.829562	7.31637
Selenos	0.829524	10.7722
0610040B10Rik	0.829512	0.788497
Armc6	0.829163	2.62156
Enpp3	0.828964	0.922613
Metap2	0.828407	8.71592
Hif1a	0.827851	5.71835
Zswim7	0.827483	3.70074
Pctp	0.827377	0.964887
Brf2	0.825532	1.16097
Ppil1	0.825144	3.82512
Tro	0.824255	1.22077
Utp23	0.823851	2.61462
Ccdc58	0.823846	5.0395
Cela1	0.823714	6.22027
Mrpl15	0.823352	6.55685
Pycrl	0.823293	4.45919
Timm10	0.82322	5.10562
Cdk5rap3	0.823141	6.19159
Hyal2	0.822577	3.81685
Srgn	0.822418	1.54628
Col5a1	0.822161	6.4449
Dennd2d	0.821871	0.564492
Pigx	0.821864	7.40914
Ddx28	0.821836	1.95368
Dcaf13	0.821433	5.68451
Timm17a	0.821154	7.49732
Cfap69	0.820791	1.66235
Siah1a	0.820511	3.81426
4833420G17Rik	0.820371	3.0687
Mapkapk3	0.81942	6.79288
S100a6	0.818374	15.6885
AI413582	0.817887	3.41896
A230072E10Rik	0.81765	0.423662
Tmem158	0.81719	1.45885
Gm47547	0.816718	2.36948
Psma4	0.816575	12.4258
Nfkb2	0.815548	4.35878
Ldlr	0.814983	3.87937
Immt	0.814948	6.5598
Ywhaq	0.814571	16.1008
Nifk	0.814498	4.47999
Ddx1	0.813955	7.1923
Gpd2	0.812947	5.27144
Ccdc9	0.812921	4.45916
Tti2	0.81281	2.68259
Smn1	0.812665	5.01857
Nop9	0.812241	4.57189
Necap2	0.811426	5.93848
Bag1	0.81093	12.4663
Fam114a1	0.810765	5.60606
Imp4	0.810543	4.41271
Pxylp1	0.80966	1.55413
Rars	0.809413	6.45774
Arpc2	0.8094	22.5234
Grk5	0.809296	1.99746
Acvr2a	0.809128	1.01802
Lman1	0.808767	9.9906
Sh3rf1	0.808733	2.22412
Cfl1	0.8084	16.5672
Prelid1	0.808078	8.98956
Hspe1	0.807784	9.42464
Bst2	0.80721	11.0148
Mansc1	0.806991	2.64965
Cacybp	0.806907	10.5495
Tradd	0.80687	6.76015
Lsm6	0.806855	6.70731
Tbc1d22a	0.806766	1.55151
Memo1	0.80618	4.40181
Pcgf5	0.805733	4.8756
Cpt2	0.805685	5.22245
1700086O06Rik	0.805507	1.45226
Nnmt	0.805437	10.2648
Hunk	0.805211	0.429838
Pnpt1	0.804522	2.53303
Glb1	0.804397	5.67944
Skil	0.804315	7.00244
Snx9	0.8043	4.63157
Btc	0.803616	1.89931
Adal	0.803237	1.23193
Surf4	0.803179	8.59681
Zfp758	0.803078	0.731324
Cops8	0.802606	7.32204
P4hb	0.802563	8.52673
Zc3h14	0.801984	5.65454
E130311K13Rik	0.801551	3.0877
2310040G24Rik	0.801132	0.718472
Hspa4l	0.800906	3.2281
Anapc10	0.800705	5.94506
Tomm5	0.800645	8.07559
Sec61a2	0.799786	2.60665
Tkt	0.799738	6.08989
Ipo9	0.798766	2.73945
Slc38a6	0.798493	0.634997
Creb3	0.798129	8.04632
Uba5	0.79778	6.8559
Adipor1	0.797707	6.86868
Meg3	0.797086	7.35683
Stk17b	0.796973	1.70465
Actg1	0.796053	17.3318
Gorab	0.795926	2.94673
Colgalt1	0.795204	5.61645
Plekha8	0.794985	1.65741
Ctsb	0.794851	16.6509
Tm9sf3	0.794626	9.4679
Bud31	0.794551	8.71169
Abhd10	0.794448	3.16239
Asah1	0.79343	7.14731
Erlin2	0.79263	3.7773
Minos1	0.791356	13.56
Serpina3m	0.791278	0.288901
Sfmbt1	0.791262	1.88574
Ebp	0.791184	7.12443
Lyplal1	0.791136	2.89014
Scpep1	0.790566	4.80821
Gmppa	0.790556	6.41276
Stoml1	0.790155	3.4913
Gemin5	0.790134	1.6654
Zfp647	0.789667	0.456208
Calm1	0.78913	19.0191
Slc1a2	0.788952	0.423662
Timm22	0.788646	5.21592
Pus1	0.788591	3.76343
H1fx	0.788198	1.98341
Adam9	0.788072	4.32392
Fkbp1b	0.788033	1.61063
Ccdc114	0.78753	1.1288
Lor	0.786943	0.285957
Fpgs	0.786516	3.85455
Haus2	0.78648	2.96139
Gm26890	0.786042	1.02829
Mgst2	0.785969	1.46616
Zfp959	0.785965	1.04923
Lins1	0.785779	0.791409
Atp6v0d1	0.785586	7.27741
Slc41a2	0.785293	1.16628
Rnf115	0.78465	5.91551
Cisd1	0.784506	5.09542
Cldn3	0.78357	6.56442
Eif1a	0.783394	8.83649
Lactb	0.783357	2.5025
Ankrd37	0.783046	0.311236
Fam69a	0.782818	2.48301
Sft2d1	0.782523	5.03334
Grk6	0.782239	2.14753
Smpd4	0.782165	1.76695
Banf1	0.782083	5.70621
Tmtc4	0.781622	4.52352
Mcfd2	0.781311	6.68601
Blvra	0.781285	5.3454
Orc4	0.781039	5.84843
Dnaja1	0.780708	14.6669
B4galt3	0.780555	3.98466
Prpf38a	0.779795	4.36138
Cyb5r3	0.779622	13.6479
2610002M06Rik	0.778937	3.69668
D030056L22Rik	0.77892	4.09473
Tppp3	0.778806	2.69946
Mtch2	0.778678	10.8969
Abhd11	0.778646	5.60631
Kctd14	0.778532	1.14963
Casp3	0.778435	3.8786
Stap2	0.778039	5.27764
Eif3a	0.77739	8.89975
Pigs	0.777359	4.58676
Alms1	0.777332	0.594654
Rap1a	0.776319	11.4649
Med12	0.776144	1.11889
Gabpb1	0.775862	2.85923
Kti12	0.775825	2.66556
Uap1l1	0.775746	5.49418
Glrx5	0.775373	5.31109
Mrpl3	0.774978	6.15945
Gstp1	0.774796	8.01428
Tsen2	0.774704	3.70887
Ppp1r13l	0.774377	3.82672
Cdv3	0.774333	7.07269
Mcm4	0.774332	2.91656
Znhit1	0.774318	8.04355
Ghitm	0.773671	9.7595
Cycs	0.773406	10.5162
Sil1	0.773297	6.12759
Hira	0.772831	1.58213
Gpt	0.77232	2.16906
Eya4	0.77171	0.14868
Lsm7	0.771581	6.4058
Iars	0.771477	3.10776
2600006K01Rik	0.770885	0.918357
Lrrc17	0.770744	2.4104
Psmd8	0.770407	9.21852
Nudcd1	0.770371	6.63011
Trp53	0.77025	7.77962
Bud13	0.770109	1.74308
Hilpda	0.769483	3.2213
Mvb12a	0.769101	6.01223
[truncated: 10,763 more rows]
