# Supplementary material for: Single-cell transcriptomics defines heterogeneity of epicardial cells and fibroblasts within the infarcted murine heart
Source: eLife. 2021 Jun 21;10:e65921. doi: 10.7554/eLife.65921 (PMC8216715; doi:10.7554/eLife.65921)
Supplement: Supplementary file 2. [file elife-65921-supp2.xlsx]

## Sheet: (A) EpiSC
EpiSC	p_val	avg_logFC	pct.1	pct.2	p_val_adj	cluster	gene
	0	2.17499	0.892	0.661	0	1	Saa3
	0	1.84942	0.985	0.831	0	1	Clu
	0	1.57378	0.903	0.542	0	1	Trf
	0	1.33939	0.901	0.508	0	1	Dmkn
	0	1.27619	0.705	0.087	0	1	Gatm
	0	1.23835	0.776	0.17	0	1	Nkain4
	0	1.22559	0.735	0.231	0	1	Slpi
	0	1.19308	0.992	0.752	0	1	S100a1
	0	1.17203	0.918	0.155	0	1	Wt1
	0	1.09541	0.819	0.286	0	1	Lgals7
	0	1.07505	0.773	0.116	0	1	Wnt4
	0	1.07276	0.8	0.363	0	1	Ldhb
	0	1.03806	0.747	0.083	0	1	Cxadr
	0	1.02001	0.877	0.267	0	1	Slc9a3r1
	0	0.977045	0.811	0.169	0	1	Ptgs1
	0	0.94804	0.968	0.793	0	1	Hspb1
	0	0.905687	1	1	0	1	Fth1
	0	0.900201	0.548	0.142	0	1	Upk1b
	0	0.878323	0.585	0.214	0	1	Krt19
	0	0.875232	0.934	0.759	0	1	Tsc22d1
	0	0.856295	0.858	0.448	0	1	Smim1
	0	0.849702	0.549	0.085	0	1	Tesc
	0	0.830047	0.76	0.242	0	1	Flrt2
	0	0.818575	0.835	0.259	0	1	Nectin2
	0	0.810997	0.742	0.234	0	1	Atp1b1
	0	0.796098	0.759	0.239	0	1	Isyna1
	0	0.780163	0.544	0.129	0	1	Upk3b
	0	0.77457	0.736	0.209	0	1	Ezr
	0	0.772454	0.877	0.512	0	1	Arhgdib
	0	0.743803	0.689	0.09	0	1	F11r
	0	0.741682	0.757	0.265	0	1	Rpp25
	0	0.732941	0.654	0.121	0	1	Aplp1
	0	0.713093	0.908	0.705	0	1	Lgmn
	0	0.705879	0.628	0.09	0	1	Gpm6a
	0	0.703872	0.678	0.113	0	1	Maf
	0	0.701231	0.375	0.037	0	1	Aqp5
	0	0.688703	0.686	0.263	0	1	Cotl1
	0	0.683246	0.86	0.565	0	1	Sdc4
	0	0.677349	0.918	0.721	0	1	Timp3
	0	0.672939	0.988	0.865	0	1	Cebpb
	0	0.671159	0.591	0.078	0	1	Frmd4b
	0	0.659813	0.787	0.317	0	1	Plscr1
	0	0.659425	0.709	0.256	0	1	Sbsn
	0	0.639284	0.525	0.114	0	1	Krt8
	0	0.637927	0.549	0.081	0	1	Tmem108
	0	0.632274	0.507	0.064	0	1	Lrrn4
	0	0.627927	0.697	0.258	0	1	Dab2
	0	0.627098	0.965	0.835	0	1	Mgst1
	0	0.626162	0.697	0.245	0	1	Gjb5
	0	0.624891	0.989	0.961	0	1	Zfp706
	0	0.610692	0.704	0.23	0	1	Cdh11
	0	0.598424	0.445	0.046	0	1	Npl
	0	0.596127	0.52	0.093	0	1	Gjb3
	0	0.584999	0.702	0.367	0	1	Soat1
	0	0.562577	0.474	0.074	0	1	Smpd3
	0	0.552095	0.985	0.877	0	1	Tmem176b
	0	0.544339	0.998	0.984	0	1	Fn1
	0	0.543796	0.345	0.066	0	1	Cldn3
	0	0.540659	0.417	0.029	0	1	Ptger3
	0	0.537176	0.673	0.236	0	1	Slit3
	0	0.535315	0.881	0.607	0	1	Gata6
	0	0.527395	0.453	0.044	0	1	Nfe2l3
	0	0.526753	0.436	0.092	0	1	Tspan13
	0	0.52644	0.554	0.078	0	1	Myrf
	0	0.513461	0.991	0.958	0	1	Ptgis
	0	0.497666	0.534	0.086	0	1	Fcor
	0	0.492294	0.984	0.921	0	1	Anp32a
	0	0.48106	0.999	0.988	0	1	Cstb
	0	0.480514	0.662	0.258	0	1	Skap2
	0	0.479712	0.61	0.252	0	1	Rpap3
	0	0.472749	0.534	0.165	0	1	Ttc9
	0	0.464571	0.533	0.074	0	1	Stxbp2
	0	0.448403	0.569	0.219	0	1	Gm20186
	0	0.447523	0.446	0.095	0	1	Tinagl1
	0	0.446487	0.613	0.212	0	1	Aldh1a2
	0	0.443535	1	0.997	0	1	Npc2
	0	0.439308	0.514	0.174	0	1	Mapkapk3
	0	0.439241	0.54	0.182	0	1	Plscr2
	0	0.437936	0.483	0.139	0	1	Zfp503
	0	0.431974	0.395	0.066	0	1	Nxnl2
	0	0.426357	0.497	0.109	0	1	Folr1
	0	0.426081	0.464	0.076	0	1	Esam
	0	0.415097	0.582	0.204	0	1	Efna5
	0	0.403168	0.448	0.054	0	1	Stk26
	0	0.40291	0.547	0.194	0	1	Ociad2
	0	0.388137	0.405	0.073	0	1	Tmem151a
	0	0.387357	0.423	0.107	0	1	Celf4
	0	0.376285	0.381	0.057	0	1	Pkhd1l1
	0	0.371015	0.391	0.076	0	1	Tmem37
	0	0.367042	0.352	0.034	0	1	Plek2
	0	0.366393	0.455	0.119	0	1	Ildr2
	0	0.364382	0.375	0.062	0	1	Lsr
	0	0.36415	0.445	0.107	0	1	Ucp2
	0	0.362567	0.378	0.058	0	1	Adamts9
	0	0.359068	0.44	0.108	0	1	Zfp395
	0	0.3519	0.407	0.088	0	1	Spint2
	0	0.342482	0.485	0.137	0	1	Slc38a1
	0	0.329897	0.326	0.052	0	1	Rnf128
	0	0.303703	0.303	0.032	0	1	Aox3
	0	0.303571	0.312	0.044	0	1	Cela1
	0	0.289281	1	1	0	1	Prdx1
	0	0.283562	0.26	0.029	0	1	Fam110c
	0	0.269442	0.339	0.069	0	1	2310030G06Rik
	0	0.258241	0.274	0.031	0	1	Gata5
	9.28376e-307	0.363272	0.315	0.061	1.61482e-302	1	Hoxa5
	1.11999e-304	0.490406	0.98	0.891	1.94812e-300	1	Hmgn2
	1.73773e-303	0.406123	0.992	0.979	3.02261e-299	1	Snrpg
	1.20792e-300	0.42702	0.552	0.214	2.10105e-296	1	Acsl4
	1.85356e-300	0.485606	0.768	0.41	3.22409e-296	1	Ifi204
	3.69118e-298	0.416857	0.464	0.142	6.42044e-294	1	Gpc3
	3.72875e-296	0.333711	0.404	0.107	6.48579e-292	1	Tmeff2
	1.64115e-291	0.425674	0.594	0.249	2.85462e-287	1	Syne2
	9.81401e-290	0.428534	0.612	0.262	1.70705e-285	1	Arhgap29
	1.19971e-286	0.334235	0.421	0.121	2.08677e-282	1	C2
	1.74779e-285	0.386011	0.485	0.164	3.0401e-281	1	Steap4
	3.05868e-284	0.289567	1	1	5.32026e-280	1	Ndufa4
	7.88552e-281	0.274521	0.283	0.052	1.37161e-276	1	Arl4d
	1.78283e-280	0.45326	0.965	0.793	3.10105e-276	1	Gm12840
	1.30552e-278	0.513209	0.615	0.264	2.27082e-274	1	Serpinb6b
	2.40563e-278	0.46639	0.958	0.81	4.18436e-274	1	Tmem176a
	4.8486e-277	0.473887	0.428	0.132	8.43365e-273	1	Cfb
	3.47933e-276	0.322988	0.325	0.075	6.05194e-272	1	Csf1r
	1.00774e-271	0.496214	0.916	0.772	1.75287e-267	1	Marcksl1
	3.74942e-271	0.41406	0.625	0.287	6.52174e-267	1	Acp5
	5.83735e-271	0.518747	0.757	0.414	1.01535e-266	1	C1s1
	5.03481e-270	0.386128	0.623	0.28	8.75754e-266	1	Cd2ap
	1.69933e-269	0.31283	0.406	0.12	2.95581e-265	1	Acot1
	1.73266e-269	0.391562	0.441	0.142	3.01379e-265	1	Wnt5a
	4.79814e-269	0.780833	0.893	0.745	8.34588e-265	1	Spon2
	1.55079e-266	0.492312	0.774	0.47	2.69744e-262	1	Cav1
	2.74577e-266	0.410002	0.371	0.098	4.776e-262	1	Rspo1
	9.24787e-266	0.523638	0.841	0.611	1.60857e-261	1	Pdpn
	1.20402e-265	0.373157	0.458	0.156	2.09428e-261	1	2200002D01Rik
	1.00637e-254	0.597517	0.974	0.853	1.75049e-250	1	Cryab
	1.42891e-254	0.438993	0.793	0.493	2.48544e-250	1	Rbpms
	1.36276e-253	0.343273	0.545	0.225	2.37038e-249	1	Ptprf
	2.60235e-247	0.419672	0.71	0.396	4.52653e-243	1	Fam136a
	1.52944e-246	0.346763	0.419	0.14	2.66031e-242	1	Pappa
	6.13077e-246	0.305429	0.383	0.115	1.06639e-241	1	Usp53
	6.01797e-238	0.311558	0.363	0.109	1.04677e-233	1	Tuba4a
	5.76684e-237	0.296667	1	0.998	1.00308e-232	1	Pabpc1
	3.80074e-235	0.304168	0.465	0.171	6.61101e-231	1	Oas1a
	5.21283e-234	0.358297	0.505	0.205	9.0672e-230	1	Tgm2
	8.10209e-234	0.39202	0.818	0.561	1.40928e-229	1	Pigyl
	2.76826e-233	0.33898	0.354	0.107	4.81512e-229	1	Eno3
	3.69811e-233	0.42493	0.637	0.329	6.43249e-229	1	Ncoa4
	3.18845e-229	0.289379	0.476	0.181	5.54599e-225	1	Tfdp2
	4.66741e-227	0.362625	0.987	0.963	8.1185e-223	1	1810037I17Rik
	1.04808e-225	0.29948	0.506	0.202	1.82302e-221	1	Hspb2
	3.63583e-225	0.312345	0.395	0.134	6.32416e-221	1	Tkfc
	2.80409e-222	0.273004	0.366	0.113	4.87744e-218	1	Cdh3
	2.45788e-221	0.343737	0.544	0.238	4.27524e-217	1	Cpz
	1.19537e-220	0.348214	0.505	0.213	2.07922e-216	1	Apol9a
	1.02901e-218	0.303554	0.458	0.178	1.78986e-214	1	Spsb1
	1.45229e-217	0.341241	0.958	0.864	2.52612e-213	1	Aprt
	1.65451e-217	0.35595	0.321	0.089	2.87786e-213	1	Cldn15
	4.79564e-215	0.33847	0.511	0.223	8.34153e-211	1	Rbbp8
	1.3191e-212	0.394868	0.964	0.894	2.29444e-208	1	Nnmt
	2.41817e-210	0.395532	0.728	0.439	4.20616e-206	1	Ppfibp1
	4.15388e-210	0.280616	0.377	0.124	7.22525e-206	1	Bicd1
	1.10068e-209	0.510181	0.874	0.709	1.91452e-205	1	Creg1
	5.50359e-209	0.379109	0.605	0.298	9.57295e-205	1	Zbp1
	2.88061e-208	0.287188	0.436	0.163	5.01053e-204	1	Tst
	3.29282e-208	0.334554	0.535	0.24	5.72753e-204	1	Tiparp
	3.56592e-204	0.319697	0.564	0.269	6.20257e-200	1	Ilvbl
	7.97665e-203	0.3845	0.697	0.387	1.38746e-198	1	Oasl2
	9.99131e-203	0.305897	0.317	0.092	1.73789e-198	1	Anxa8
	9.66659e-202	0.333703	0.593	0.295	1.68141e-197	1	Efnb1
	1.53798e-201	0.30304	0.498	0.219	2.67516e-197	1	Gpr39
	1.75806e-201	0.389245	0.796	0.56	3.05796e-197	1	Syngr2
	5.95092e-200	0.428302	0.978	0.941	1.0351e-195	1	Prr13
	7.47196e-200	0.388952	0.736	0.463	1.29967e-195	1	Rras2
	1.77589e-198	0.280179	0.466	0.197	3.08897e-194	1	Pelp1
	3.85043e-198	0.358582	0.315	0.096	6.69743e-194	1	Cldn10
	3.79031e-197	0.357995	0.582	0.282	6.59287e-193	1	Adgrd1
	1.29511e-195	0.950663	0.471	0.209	2.25272e-191	1	Serpinb2
	2.90172e-195	0.257025	1	1	5.04725e-191	1	H3f3b
	3.59147e-195	0.341432	0.955	0.902	6.24701e-191	1	Ap2s1
	8.02374e-195	0.330064	0.53	0.248	1.39565e-190	1	Slc9a3r2
	1.34229e-190	0.539776	0.617	0.356	2.33477e-186	1	Ncam1
	2.04336e-189	0.347766	0.256	0.066	3.55422e-185	1	Ifitm1
	1.64362e-187	0.274247	0.409	0.156	2.85891e-183	1	Ifi47
	3.39481e-187	0.298159	0.326	0.106	5.90494e-183	1	Sugct
	4.47566e-181	0.324038	0.517	0.24	7.78496e-177	1	Emilin2
	1.98157e-180	0.335672	0.688	0.4	3.44674e-176	1	Meis2
	2.36706e-180	0.310041	0.461	0.2	4.11726e-176	1	Kiz
	3.39641e-180	0.422522	0.756	0.519	5.90772e-176	1	Irf7
	9.17718e-180	0.348702	0.872	0.715	1.59628e-175	1	Psme1
	2.44369e-178	0.477511	0.395	0.154	4.25056e-174	1	Has1
	9.41545e-178	0.276718	0.505	0.235	1.63772e-173	1	Sap30
	2.21423e-176	0.286952	0.483	0.219	3.85143e-172	1	Cd82
	6.88152e-176	0.291261	0.273	0.076	1.19697e-171	1	Hpgd
	5.55285e-175	0.260857	0.453	0.197	9.65862e-171	1	Ddr1
	1.3683e-174	0.32152	0.618	0.335	2.38002e-170	1	Pycard
	9.81692e-174	0.263689	0.451	0.199	1.70756e-169	1	Zdhhc12
	2.45984e-173	0.339545	0.53	0.271	4.27864e-169	1	Fzd1
	2.1898e-172	0.354776	0.657	0.381	3.80894e-168	1	Rrm1
	3.6479e-172	0.308144	0.644	0.368	6.34516e-168	1	Pafah1b3
	4.99532e-172	0.26949	0.487	0.224	8.68886e-168	1	Tnfaip8
	1.44728e-170	0.354393	0.75	0.502	2.5174e-166	1	Arid5b
	1.65386e-165	0.356072	0.552	0.289	2.87672e-161	1	Gda
	6.7822e-165	0.302814	0.942	0.887	1.1797e-160	1	Vamp8
	1.82165e-163	0.405708	0.602	0.341	3.16858e-159	1	Lgals3
	2.35447e-162	0.266077	1	0.996	4.09536e-158	1	Clic1
	1.07811e-158	0.250151	0.381	0.156	1.87526e-154	1	Apol9b
	1.90869e-158	0.282203	0.505	0.248	3.31998e-154	1	Rnf213
	1.41205e-157	0.318958	0.452	0.215	2.45612e-153	1	Naaa
	3.46441e-155	0.277298	0.462	0.221	6.02599e-151	1	Meis1
	4.20799e-154	0.254384	0.429	0.193	7.31938e-150	1	Tlcd2
	4.85414e-153	0.308944	0.406	0.178	8.44329e-149	1	Adgrg2
	5.30146e-151	0.274248	0.577	0.318	9.22136e-147	1	Nradd
	7.87773e-149	0.320679	0.673	0.409	1.37025e-144	1	Steap1
	4.7083e-148	0.32033	0.609	0.344	8.18962e-144	1	Mndal
	5.53761e-147	0.280029	0.373	0.158	9.63213e-143	1	Abcb1b
	6.09213e-145	0.300666	0.626	0.373	1.05966e-140	1	Nxn
	9.35988e-145	0.277186	0.496	0.253	1.62806e-140	1	Mmp19
	1.59642e-144	0.25659	0.503	0.256	2.77682e-140	1	St3gal1
	4.10429e-143	0.272328	0.613	0.358	7.139e-139	1	Lpcat3
	4.36966e-143	0.483148	0.786	0.628	7.6006e-139	1	Tmem33
	1.60217e-142	0.374679	0.587	0.347	2.78682e-138	1	Laptm4b
	6.2232e-142	0.453656	0.431	0.207	1.08246e-137	1	Igfbp3
	8.85974e-142	0.305188	0.754	0.534	1.54106e-137	1	Echs1
	4.40468e-141	0.261035	0.576	0.321	7.66151e-137	1	Mitd1
	5.41382e-141	0.267207	0.935	0.849	9.41681e-137	1	Timm8b
	4.60046e-139	0.252769	0.4	0.178	8.00205e-135	1	Icam1
	2.33433e-137	0.370484	0.559	0.331	4.06034e-133	1	Avpi1
	2.64579e-137	0.260577	0.399	0.18	4.60209e-133	1	Dusp6
	2.94406e-137	0.30322	0.899	0.81	5.1209e-133	1	P3h4
	7.55549e-137	0.252476	0.507	0.267	1.3142e-132	1	Ano6
	4.59456e-136	0.291162	0.823	0.617	7.99177e-132	1	C3
	3.92031e-135	0.457147	0.819	0.677	6.81899e-131	1	Serpinb1a
	6.14429e-135	0.325971	0.779	0.58	1.06874e-130	1	Psmb8
	1.03353e-133	0.381138	0.937	0.888	1.79773e-129	1	Fscn1
	1.63699e-131	0.304302	0.573	0.333	2.84738e-127	1	Stat1
	4.3682e-131	0.317631	1	1	7.59805e-127	1	Lgals1
	1.21215e-130	0.325505	0.738	0.537	2.10842e-126	1	Gsr
	5.08663e-129	0.263052	0.409	0.195	8.84768e-125	1	Capn6
	6.51363e-128	0.255887	0.97	0.94	1.13298e-123	1	Psme2
	6.5115e-127	0.264481	0.646	0.408	1.13261e-122	1	Gm8186
	6.50845e-126	0.356367	0.649	0.406	1.13208e-121	1	Gas7
	2.29295e-124	0.899956	0.393	0.21	3.98835e-120	1	Enpp2
	3.65807e-122	0.268919	0.592	0.349	6.36284e-118	1	Plaur
	1.52968e-121	0.292879	0.476	0.25	2.66073e-117	1	Rdh10
	1.54735e-119	0.988593	0.334	0.154	2.69146e-115	1	Angptl7
	1.55533e-119	0.277711	0.59	0.352	2.70534e-115	1	Cxcl16
	6.47297e-119	0.435452	0.801	0.683	1.12591e-114	1	Mdk
	8.67269e-117	0.297424	0.834	0.713	1.50853e-112	1	Cd151
	1.83879e-108	0.257035	0.817	0.674	3.19839e-104	1	Rab5c
	4.37547e-108	0.278224	0.579	0.368	7.61068e-104	1	Glb1
	5.56613e-105	0.272387	0.838	0.732	9.68173e-101	1	Isg15
	7.12916e-105	0.26471	0.992	0.983	1.24005e-100	1	Nme1
	8.50782e-105	0.276156	0.999	0.992	1.47985e-100	1	S100a10
	4.98465e-103	0.283306	0.637	0.413	8.6703e-99	1	C1ra
	1.23329e-101	0.266002	0.861	0.751	2.14519e-97	1	Atp1a1
	6.13538e-101	0.259341	0.544	0.337	1.06719e-96	1	Il1r1
	4.97078e-100	0.301104	0.742	0.557	8.64617e-96	1	Rtp4
	1.41004e-95	0.303041	0.719	0.534	2.45262e-91	1	Tmem119
	3.22455e-94	0.262824	0.702	0.508	5.60878e-90	1	Ppp1r12a
	9.60748e-94	0.254173	0.705	0.514	1.67113e-89	1	Zfand5
	6.07003e-92	0.27126	0.696	0.51	1.05582e-87	1	Grb10
	7.13254e-91	0.461966	0.356	0.192	1.24063e-86	1	Fabp4
	1.2277e-88	0.295716	0.596	0.408	2.13545e-84	1	Rgs10
	2.52386e-87	0.256623	0.893	0.843	4.39e-83	1	Plod2
	1.13408e-85	0.313876	0.688	0.521	1.97261e-81	1	Gfpt2
	2.3557e-83	0.250365	0.443	0.264	4.0975e-79	1	Cyp1b1
	8.47986e-83	0.509194	0.631	0.482	1.47499e-78	1	Fabp5
	1.39191e-78	0.320982	0.794	0.694	2.42109e-74	1	Ier3
	1.4806e-76	0.416708	0.578	0.407	2.57535e-72	1	S100a4
	3.19611e-69	0.419399	0.684	0.571	5.55931e-65	1	Ccl2
	4.27076e-50	0.267461	0.513	0.366	7.42856e-46	1	Cavin2
	9.07257e-46	0.395207	0.603	0.503	1.57808e-41	1	Osr1
	9.42018e-43	0.2639	0.727	0.621	1.63855e-38	1	Acaa2
	1.51666e-42	0.330395	0.851	0.841	2.63809e-38	1	H2-K1
	8.50986e-39	0.330387	0.783	0.744	1.4802e-34	1	Btg2
	1.46613e-29	0.331621	0.713	0.657	2.55019e-25	1	Hmgb2
	4.34334e-13	0.388709	0.925	0.923	7.5548e-09	1	Mgp
	7.1496e-05	0.261475	0.854	0.917	1	1	Tm4sf1
	0	1.41567	0.994	0.934	0	2	Acta2
	0	1.17399	0.89	0.67	0	2	Tagln
	0	1.09894	0.883	0.575	0	2	Myl9
	0	1.09335	0.717	0.324	0	2	Ccl9
	0	0.99976	0.997	0.903	0	2	Cthrc1
	0	0.84573	0.709	0.249	0	2	Ddah1
	0	0.817016	0.996	0.929	0	2	Tpm2
	0	0.803836	0.813	0.354	0	2	Glipr1
	0	0.755751	0.95	0.833	0	2	Lrrc59
	0	0.748534	0.935	0.73	0	2	Cnn2
	0	0.718468	0.993	0.98	0	2	Eno1
	0	0.709937	0.837	0.41	0	2	Nt5dc2
	0	0.70274	0.998	0.983	0	2	Mif
	0	0.693461	0.973	0.87	0	2	Fkbp11
	0	0.687372	0.589	0.104	0	2	Col11a1
	0	0.679317	0.814	0.46	0	2	Tmem97
	0	0.653017	0.817	0.382	0	2	Loxl3
	0	0.645768	0.934	0.776	0	2	Csrp1
	0	0.635672	0.994	0.955	0	2	Kdelr2
	0	0.629756	0.978	0.919	0	2	Pgk1
	0	0.619572	0.998	0.995	0	2	Ldha
	0	0.619279	0.917	0.826	0	2	Srm
	0	0.590732	0.779	0.339	0	2	Wisp1
	0	0.577681	0.984	0.936	0	2	Ckap4
	0	0.571359	0.997	0.99	0	2	Slc25a5
	0	0.570668	0.742	0.301	0	2	Bcat1
	0	0.562157	0.909	0.692	0	2	P4ha2
	0	0.56144	1	1	0	2	Serpinh1
	0	0.547697	0.989	0.907	0	2	Kdelr3
	0	0.546972	0.953	0.794	0	2	Fkbp10
	0	0.545387	0.672	0.241	0	2	P4ha3
	0	0.52858	0.993	0.961	0	2	Lman1
	0	0.520658	0.996	0.96	0	2	Rcn1
	0	0.515763	0.999	0.998	0	2	Gapdh
	0	0.510606	0.999	0.999	0	2	Eif5a
	0	0.509033	0.999	0.995	0	2	Pkm
	0	0.50603	0.974	0.848	0	2	Lox
	0	0.504996	0.999	0.99	0	2	Ssr2
	0	0.504264	0.955	0.866	0	2	Actn1
	0	0.49117	1	1	0	2	Rps2
	0	0.479614	0.92	0.69	0	2	Glipr2
	0	0.478672	0.934	0.823	0	2	Ppa1
	0	0.477719	0.596	0.219	0	2	Asns
	0	0.47287	0.999	0.994	0	2	Tpm4
	0	0.469378	0.889	0.615	0	2	P3h1
	0	0.467678	1	1	0	2	Col1a1
	0	0.44711	1	1	0	2	Eef1g
	0	0.438265	0.991	0.951	0	2	Serp1
	0	0.436738	0.973	0.924	0	2	Prelid1
	0	0.433402	0.979	0.909	0	2	Sec13
	0	0.424958	0.994	0.978	0	2	Maged1
	0	0.413404	0.999	0.988	0	2	Rrbp1
	0	0.409312	1	0.997	0	2	Aldoa
	0	0.405751	0.981	0.921	0	2	Surf4
	0	0.397705	0.999	0.994	0	2	Ostc
	0	0.395758	1	0.997	0	2	Sec61b
	0	0.391514	0.538	0.164	0	2	Pxylp1
	0	0.390761	1	1	0	2	Rpsa
	0	0.383312	1	0.999	0	2	Rpl5
	0	0.380769	1	0.997	0	2	Rack1
	0	0.379849	1	1	0	2	Cfl1
	0	0.374363	0.993	0.965	0	2	Sar1a
	0	0.366163	0.502	0.135	0	2	Hs6st2
	0	0.345315	1	0.998	0	2	Rpl12
	0	0.343569	0.999	0.993	0	2	Tmem258
	0	0.341348	1	1	0	2	Cd63
	0	0.340136	1	1	0	2	Rpl3
	0	0.338234	1	1	0	2	Rplp0
	0	0.336989	1	1	0	2	Sec61g
	0	0.330777	1	1	0	2	Ybx1
	0	0.311813	1	1	0	2	Rpl4
	0	0.311585	1	1	0	2	Rpl27a
	0	0.306863	1	1	0	2	Rpl19
	0	0.296741	1	1	0	2	Rpl14
	0	0.284929	1	1	0	2	Rps27a
	0	0.27052	1	1	0	2	Rps11
	0	0.269079	1	1	0	2	Rpl32
	0	0.26501	1	1	0	2	Rps23
	0	0.259948	1	1	0	2	Rps18
	5.02008e-308	0.341492	1	0.999	8.73192e-304	2	Pdia6
	2.49308e-306	0.34625	1	1	4.33647e-302	2	Rps10
	1.33952e-305	0.353102	1	1	2.32997e-301	2	Rpl29
	1.08656e-304	0.452663	0.951	0.866	1.88996e-300	2	Ssr1
	4.5164e-302	0.72157	0.499	0.182	7.85583e-298	2	Ddit4l
	1.716e-301	0.26488	1	1	2.98481e-297	2	Rpl21
	1.09895e-299	0.455388	0.999	0.997	1.91151e-295	2	Npm1
	4.21153e-299	0.30598	1	0.996	7.32554e-295	2	Tmed9
	4.71311e-299	0.589352	0.988	0.913	8.19799e-295	2	Csrp2
	7.72253e-299	0.418477	0.833	0.476	1.34326e-294	2	Pdia5
	4.86676e-297	0.434813	0.728	0.373	8.46523e-293	2	Srprb
	1.27744e-295	0.431647	0.995	0.973	2.22199e-291	2	Tpm1
	3.3663e-293	0.403926	0.999	0.994	5.85534e-289	2	Rcn3
	1.67893e-290	0.434491	1	0.999	2.92033e-286	2	Hspa5
	2.06749e-290	0.296594	1	0.999	3.59619e-286	2	Rpl27
	2.6789e-290	0.288003	1	1	4.65968e-286	2	Rps17
	2.81692e-287	0.503859	0.982	0.935	4.89976e-283	2	Maged2
	1.50579e-286	0.257656	1	1	2.61916e-282	2	Rps3
	3.4752e-285	0.364911	0.995	0.989	6.04477e-281	2	Rbm3
	4.86296e-285	0.371894	0.637	0.271	8.45864e-281	2	Col12a1
	1.55371e-283	0.413888	0.997	0.994	2.70253e-279	2	Calr
	5.43426e-283	0.444222	0.612	0.269	9.45234e-279	2	Mthfd2
	2.19074e-282	0.503667	0.992	0.988	3.81057e-278	2	Manf
	2.94785e-280	0.448931	0.819	0.484	5.12748e-276	2	Tspan6
	8.18949e-279	0.396931	0.971	0.917	1.42448e-274	2	Eif4ebp1
	3.17521e-277	0.541545	0.426	0.133	5.52296e-273	2	Cnn1
	6.16498e-277	0.358711	0.593	0.247	1.07234e-272	2	Haus7
	7.48535e-276	0.4715	0.727	0.394	1.302e-271	2	Steap1
	8.93635e-276	0.378432	0.974	0.907	1.55439e-271	2	Rpn1
	1.21038e-275	0.342157	0.993	0.957	2.10534e-271	2	Arl1
	4.30958e-275	1.06911	0.816	0.656	7.49608e-271	2	Ptn
	9.21844e-275	0.298531	1	0.999	1.60346e-270	2	Rpl30
	1.40655e-274	0.26654	1	1	2.44655e-270	2	Lgals1
	3.14756e-269	0.507723	0.897	0.768	5.47487e-265	2	Creb3l1
	5.97669e-269	0.292806	1	0.999	1.03958e-264	2	Rpl22
	3.57199e-268	0.383786	0.741	0.385	6.21312e-264	2	Mpzl1
	6.95455e-268	0.503482	0.501	0.187	1.20967e-263	2	Ada
	3.28548e-267	0.422047	0.689	0.35	5.71477e-263	2	Dok1
	3.53344e-267	0.32493	1	0.998	6.14606e-263	2	Atp5b
	5.37309e-266	0.394443	1	1	9.34595e-262	2	Actg1
	6.39302e-264	0.464813	0.999	0.99	1.112e-259	2	Timp1
	7.04431e-264	0.261915	1	1	1.22529e-259	2	Rps8
	5.47007e-262	0.435705	0.993	0.98	9.51464e-258	2	Hspe1
	8.23003e-262	0.419954	0.881	0.677	1.43153e-257	2	Gars
	4.81496e-261	0.432255	0.977	0.948	8.37514e-257	2	Pgam1
	4.28825e-256	0.258858	1	1	7.45899e-252	2	Rps25
	1.41668e-254	0.327475	0.991	0.979	2.46417e-250	2	Tceal8
	1.61963e-254	0.504465	0.943	0.884	2.81718e-250	2	Tubb6
	3.75252e-254	0.373997	1	1	6.52713e-250	2	Col1a2
	7.18705e-254	0.36227	0.955	0.859	1.25012e-249	2	Yif1b
	9.49181e-254	0.277883	1	0.999	1.65101e-249	2	Tmed2
	2.86557e-253	0.377425	0.963	0.881	4.98438e-249	2	Vmp1
	4.28154e-251	0.251333	1	1	7.44731e-247	2	Rps15a
	1.73322e-250	0.427312	0.904	0.748	3.01477e-246	2	P4ha1
	3.93488e-250	0.297972	1	1	6.84434e-246	2	Rpl8
	4.01334e-250	0.311846	0.999	0.998	6.98081e-246	2	Rps12
	6.7036e-250	0.270192	1	0.999	1.16602e-245	2	Rps21
	6.88113e-250	0.269206	1	1	1.1969e-245	2	Rpl11
	2.95284e-244	0.27069	0.999	0.987	5.13617e-240	2	Tmem167
	6.52959e-244	0.284586	1	1	1.13576e-239	2	Rpl18
	8.5354e-243	0.373157	0.628	0.286	1.48465e-238	2	Enpp1
	3.46484e-242	0.420795	0.742	0.426	6.02674e-238	2	Pfkl
	4.61257e-242	0.351569	0.986	0.958	8.0231e-238	2	P4hb
	1.37355e-240	0.346846	0.972	0.921	2.38914e-236	2	Mydgf
	5.85438e-240	0.307907	0.516	0.206	1.01831e-235	2	Impdh1
	3.29424e-238	0.385751	0.749	0.423	5.73e-234	2	Gmppb
	5.65955e-238	0.27756	1	0.997	9.84422e-234	2	Ost4
	1.50146e-237	0.382598	0.957	0.883	2.61164e-233	2	Fscn1
	1.30095e-236	0.371451	0.913	0.777	2.26287e-232	2	Mlec
	9.92058e-235	0.32395	0.587	0.265	1.72559e-230	2	Nek6
	3.3697e-234	0.34223	0.638	0.308	5.86126e-230	2	Ctps
	5.89457e-234	0.338282	0.953	0.833	1.0253e-229	2	Yipf5
	3.92051e-233	0.256222	1	1	6.81933e-229	2	Rps13
	5.58007e-231	0.318078	0.478	0.182	9.70597e-227	2	Nexn
	2.24921e-227	0.260588	0.999	0.999	3.91228e-223	2	Rpl10
	1.42515e-226	0.323942	0.987	0.945	2.4789e-222	2	Txndc5
	1.63269e-226	0.442211	0.888	0.698	2.83991e-222	2	Emilin1
	6.19384e-226	0.286829	0.997	0.983	1.07736e-221	2	Reep5
	7.59165e-224	0.395275	0.996	0.994	1.32049e-219	2	Tubb5
	8.7141e-224	0.408711	0.965	0.929	1.51573e-219	2	Tpi1
	1.13124e-223	0.333981	0.994	0.973	1.96768e-219	2	Cnn3
	7.58698e-223	0.25764	0.393	0.13	1.31968e-218	2	Prr7
	3.57597e-222	0.271025	0.997	0.994	6.22005e-218	2	Morf4l2
	4.82921e-222	0.54799	0.699	0.393	8.39993e-218	2	Gadd45g
	2.5321e-220	0.42228	0.764	0.447	4.40433e-216	2	Fhl2
	1.61104e-218	0.336543	0.501	0.209	2.80224e-214	2	Snai1
	5.38207e-218	0.292055	1	0.999	9.36157e-214	2	Rps27l
	1.70828e-217	0.370918	0.842	0.6	2.97139e-213	2	Slc35b1
	1.69418e-216	0.437166	0.965	0.93	2.94685e-212	2	Cycs
	8.33105e-216	0.350339	0.98	0.955	1.4491e-211	2	Snrpf
	1.76024e-215	0.30708	0.999	1	3.06175e-211	2	Eif4a1
	4.18302e-215	0.306054	1	0.999	7.27594e-211	2	Hsp90b1
	6.61075e-215	0.317062	0.556	0.248	1.14987e-210	2	Slc38a4
	1.6505e-211	0.276007	0.997	0.992	2.87088e-207	2	Arf1
	1.789e-206	0.330111	0.956	0.901	3.11179e-202	2	Erp29
	5.09958e-206	0.333856	0.565	0.268	8.87021e-202	2	Shmt2
	8.67468e-206	0.373081	0.952	0.901	1.50887e-201	2	Tcp1
	2.6058e-205	0.452941	0.989	0.986	4.53253e-201	2	Ran
	2.62892e-204	0.370469	0.869	0.7	4.57275e-200	2	Galk1
	5.80404e-204	0.62685	0.754	0.544	1.00955e-199	2	Slc16a3
	6.62216e-204	0.365328	0.998	0.996	1.15186e-199	2	Tagln2
	8.1595e-204	0.314244	0.962	0.885	1.41926e-199	2	Copb2
	1.03176e-203	0.385922	0.992	0.99	1.79465e-199	2	Ranbp1
	6.16858e-203	0.300686	0.988	0.979	1.07296e-198	2	Rpl36al
	4.41683e-202	0.359655	0.879	0.7	7.68263e-198	2	Siva1
	1.23144e-201	0.327082	0.931	0.815	2.14196e-197	2	Praf2
	3.0794e-201	0.374355	0.966	0.93	5.3563e-197	2	Prmt1
	4.25884e-201	0.383484	0.896	0.695	7.40782e-197	2	Ctsh
	6.734e-201	0.286677	0.589	0.285	1.17131e-196	2	Gmds
	1.32129e-200	0.325055	0.987	0.982	2.29826e-196	2	Eef1d
	2.95911e-200	0.389046	0.922	0.82	5.14707e-196	2	Prdx6
	4.05847e-199	0.40976	0.95	0.9	7.0593e-195	2	Hnrnpa1
	1.53719e-196	0.358097	0.625	0.329	2.67379e-192	2	Nolc1
	1.83574e-196	0.252134	0.448	0.173	3.19309e-192	2	Fbn2
	2.97768e-196	0.34482	0.849	0.629	5.17938e-192	2	Dnajc25
	3.88043e-196	0.328812	0.966	0.915	6.74961e-192	2	Erh
	5.02501e-196	0.337119	0.884	0.677	8.7405e-192	2	Pofut2
	6.24229e-196	0.261532	0.448	0.179	1.08578e-191	2	Scmh1
	7.22191e-196	0.335813	0.998	0.992	1.25618e-191	2	Tuba1a
	4.57537e-193	0.307325	0.986	0.959	7.9584e-189	2	Pebp1
	5.476e-193	0.306969	0.598	0.302	9.52496e-189	2	Mtap
	7.63156e-193	0.289063	0.441	0.179	1.32743e-188	2	Rrp1b
	5.59715e-192	0.324041	0.991	0.983	9.73568e-188	2	Nme1
	6.15861e-192	0.335612	0.771	0.481	1.07123e-187	2	Gpr180
	9.90137e-192	0.312156	0.921	0.795	1.72224e-187	2	Copz1
	4.42788e-191	0.353622	0.91	0.822	7.70186e-187	2	Pdap1
	1.0723e-189	0.286832	0.995	0.972	1.86516e-185	2	Copz2
	2.33592e-189	0.324455	0.897	0.765	4.0631e-185	2	Nans
	2.76999e-189	0.315811	0.693	0.365	4.81813e-185	2	Fam198b
	6.25017e-188	0.327452	0.622	0.327	1.08716e-183	2	Cdh2
	1.31654e-186	0.325561	0.912	0.801	2.29e-182	2	Dnajb11
	3.70074e-186	0.280664	0.996	0.988	6.43707e-182	2	Eef1b2
	9.0012e-186	0.495396	0.922	0.895	1.56567e-181	2	Hspd1
	5.25849e-185	0.315669	0.915	0.804	9.14662e-181	2	Nudcd2
	7.62685e-185	0.304198	0.725	0.415	1.32661e-180	2	Plod3
	1.45988e-183	0.40914	0.866	0.726	2.53931e-179	2	Tspan4
	6.39029e-183	0.307282	0.77	0.477	1.11153e-178	2	Prrc1
	7.44742e-182	0.294788	0.98	0.948	1.2954e-177	2	Cdk4
	7.57211e-182	0.418632	0.699	0.431	1.31709e-177	2	Nop56
	1.77482e-180	0.339679	0.841	0.615	3.08712e-176	2	Sec61a1
	7.27781e-180	0.278978	0.992	0.978	1.2659e-175	2	Rpn2
	4.15095e-179	0.435142	0.885	0.797	7.22016e-175	2	Nhp2
	4.29876e-179	0.279853	0.5	0.231	7.47726e-175	2	Wdr75
	6.42921e-179	0.344086	0.662	0.362	1.1183e-174	2	Tuba1c
	6.4986e-179	0.268958	0.996	0.992	1.13037e-174	2	Rpl13a
	1.19061e-178	0.462192	0.613	0.331	2.07095e-174	2	Tubb3
	1.04416e-177	0.27507	0.999	0.998	1.81622e-173	2	Rpl7a
	1.69112e-177	0.317585	0.695	0.415	2.94154e-173	2	Tars
	1.37853e-176	0.321626	0.804	0.555	2.39782e-172	2	March5
	3.78022e-176	0.256693	0.485	0.215	6.57531e-172	2	Tln2
	1.15473e-175	0.387426	0.63	0.353	2.00855e-171	2	Phgdh
	1.44317e-175	0.369909	0.703	0.402	2.51025e-171	2	Lrrc17
	7.01101e-175	0.356202	0.519	0.248	1.2195e-170	2	Sgk1
	8.32133e-175	0.284162	0.973	0.912	1.44741e-170	2	Stt3a
	1.0063e-174	0.313082	0.993	0.986	1.75036e-170	2	Serbp1
	1.24599e-173	0.256293	0.993	0.984	2.16728e-169	2	Atp5a1
	1.79791e-173	0.320941	0.66	0.373	3.12729e-169	2	2310022B05Rik
	2.42358e-173	0.379627	0.975	0.939	4.21557e-169	2	Higd1a
	2.02649e-172	0.40071	0.694	0.435	3.52487e-168	2	Lyar
	6.88824e-172	0.303046	0.91	0.803	1.19814e-167	2	Gorasp2
	9.92747e-171	0.306937	0.874	0.692	1.72678e-166	2	Cdc16
	1.16236e-169	0.329936	0.704	0.43	2.02181e-165	2	Spcs3
	1.6793e-169	0.311935	0.437	0.185	2.92097e-165	2	Ltbp2
	1.71123e-169	0.25264	0.526	0.253	2.97652e-165	2	Dusp12
	1.75878e-169	0.296038	0.636	0.353	3.05922e-165	2	Bzw2
	2.32161e-169	0.292813	0.987	0.953	4.03821e-165	2	Prdx4
	4.6917e-169	0.291412	0.696	0.412	8.16074e-165	2	Trim27
	6.69653e-169	0.314262	0.741	0.465	1.16479e-164	2	Snhg6
	1.27416e-167	0.507076	0.81	0.645	2.21627e-163	2	Cxcl12
	1.28237e-167	0.484669	0.364	0.138	2.23055e-163	2	Ptx3
	1.54159e-167	0.353802	0.819	0.622	2.68144e-163	2	Ak2
	2.38868e-167	0.30601	0.954	0.909	4.15486e-163	2	Actr3
	1.35327e-165	0.272455	0.975	0.928	2.35388e-161	2	Dap
	3.28801e-165	0.262523	0.518	0.253	5.71917e-161	2	Agpat5
	4.81206e-165	0.292419	0.723	0.442	8.3701e-161	2	Lap3
	2.2215e-164	0.300578	0.681	0.388	3.86408e-160	2	Phldb2
	7.43617e-162	0.282986	0.924	0.817	1.29345e-157	2	Copg1
	8.11547e-162	0.29786	0.592	0.321	1.41161e-157	2	Ptpn1
	2.41214e-161	0.299288	0.566	0.293	4.19568e-157	2	Ecscr
	6.21474e-161	0.563588	0.591	0.347	1.08099e-156	2	AC160336.1
	1.08742e-160	0.288417	0.707	0.428	1.89146e-156	2	Nudt5
	3.54596e-160	0.327172	0.993	0.98	6.16785e-156	2	Lmna
	2.6688e-158	0.255181	0.558	0.288	4.64211e-154	2	Alg3
	4.56654e-158	0.279505	0.621	0.343	7.94304e-154	2	Nudt4
	5.75005e-158	0.336413	0.712	0.456	1.00016e-153	2	Tomm40
	1.04118e-157	0.310262	0.915	0.813	1.81104e-153	2	Wdr1
	3.21286e-157	0.284462	0.986	0.975	5.58845e-153	2	Eloc
	3.84538e-157	0.33171	0.475	0.222	6.68865e-153	2	Cdca3
	4.02029e-157	0.299697	0.738	0.469	6.9929e-153	2	Rbmxl1
	1.38556e-155	0.394316	0.764	0.583	2.41004e-151	2	Ddx39
	1.39918e-155	0.29685	0.947	0.882	2.43374e-151	2	H13
	1.75179e-155	0.484696	0.683	0.436	3.04706e-151	2	Thbs2
	2.92566e-155	0.320168	0.612	0.353	5.0889e-151	2	Mrto4
	3.59643e-155	0.311979	0.806	0.555	6.25563e-151	2	Foxp1
	1.26386e-154	0.284336	0.755	0.485	2.19837e-150	2	Tmem214
	2.31463e-154	0.32142	0.876	0.695	4.02606e-150	2	Tgfb1i1
	3.01658e-152	0.275857	0.583	0.318	5.24704e-148	2	Pno1
	3.47003e-152	0.451559	0.285	0.095	6.03577e-148	2	Ankrd1
	9.35311e-152	0.35601	0.947	0.894	1.62688e-147	2	Fam162a
	1.11658e-151	0.275194	0.896	0.638	1.94218e-147	2	Col8a1
	2.68299e-151	0.252779	0.989	0.968	4.6668e-147	2	Selenos
	1.05788e-150	0.266921	0.627	0.352	1.84008e-146	2	Gsto1
	1.07744e-149	0.528682	0.309	0.113	1.87409e-145	2	Actg2
	1.37724e-149	0.668669	0.743	0.623	2.39558e-145	2	Plac8
	1.45302e-149	0.273	0.539	0.286	2.52738e-145	2	Mak16
	1.20841e-148	0.300895	0.737	0.473	2.10191e-144	2	Tmem70
	7.19617e-148	0.279371	0.966	0.937	1.2517e-143	2	Cct8
	1.21649e-147	0.258848	0.633	0.363	2.11596e-143	2	Slc31a1
	1.92156e-147	0.254472	0.554	0.294	3.34237e-143	2	Wdr77
	5.42958e-147	0.353191	0.798	0.596	9.44421e-143	2	Creld2
	6.29275e-147	0.285741	0.599	0.344	1.09456e-142	2	Yrdc
	1.06202e-146	0.354052	0.71	0.467	1.84729e-142	2	Nop58
	1.36005e-146	0.373841	0.79	0.601	2.36567e-142	2	Pa2g4
	2.03357e-146	0.259093	0.691	0.412	3.53719e-142	2	Pabpc4
	2.28623e-146	0.258215	0.65	0.379	3.97667e-142	2	Nubp1
	4.32998e-146	0.274866	0.473	0.228	7.53157e-142	2	Runx1
	6.54613e-146	0.351826	1	1	1.13863e-141	2	Actb
	2.13232e-145	0.279744	0.643	0.374	3.70896e-141	2	Limd2
	3.47024e-145	0.263377	0.551	0.296	6.03614e-141	2	Rnf126
	4.72079e-145	0.283114	0.674	0.395	8.21134e-141	2	Sdc1
	1.46385e-144	0.271212	0.729	0.449	2.54623e-140	2	Tfpi
	2.47039e-143	0.281814	0.694	0.431	4.29699e-139	2	Nsun2
	6.43394e-143	0.279037	0.738	0.477	1.11912e-138	2	Golt1b
	6.44732e-143	0.268018	0.945	0.909	1.12145e-138	2	Lman2
	6.13548e-142	0.315761	0.95	0.917	1.0672e-137	2	Cct7
	6.15508e-142	0.253236	0.652	0.384	1.07062e-137	2	Tmem248
	4.83073e-141	0.261162	0.762	0.494	8.40257e-137	2	Sh3gl1
	3.42342e-140	0.26245	0.669	0.405	5.95469e-136	2	Lsm12
	3.58572e-140	0.296279	0.996	0.995	6.23701e-136	2	Hmgb1
	2.6191e-139	0.2732	0.611	0.355	4.55567e-135	2	Mrps18b
	7.36011e-139	0.290347	0.453	0.218	1.28022e-134	2	Rbp4
	7.18812e-138	0.262233	0.949	0.903	1.2503e-133	2	Eif3i
	7.66726e-138	0.319202	0.617	0.374	1.33364e-133	2	Timm8a1
	8.28766e-138	0.317733	0.954	0.921	1.44155e-133	2	Nap1l1
	9.24421e-138	0.322555	0.704	0.459	1.60794e-133	2	Gnl3
	1.14669e-137	0.28289	0.612	0.365	1.99454e-133	2	Ruvbl2
	3.79498e-137	0.294215	0.725	0.475	6.60099e-133	2	Stip1
	1.53385e-136	0.308266	0.579	0.322	2.66798e-132	2	Itga5
	6.12531e-136	0.263562	0.703	0.441	1.06544e-131	2	Rars
	6.97071e-135	0.251846	0.754	0.49	1.21249e-130	2	Smco4
	2.48292e-134	0.282197	0.495	0.245	4.31879e-130	2	Ccnb2
	7.39861e-134	0.283953	0.876	0.724	1.28691e-129	2	Prrx1
	1.64441e-133	0.301464	0.439	0.211	2.86029e-129	2	Tacc3
	1.69236e-133	0.259749	0.467	0.232	2.94369e-129	2	Il4ra
	2.10348e-133	0.3093	0.555	0.313	3.6588e-129	2	Hmgb3
	6.7674e-133	0.25462	0.619	0.365	1.17712e-128	2	Thyn1
	7.86243e-133	0.296884	0.875	0.746	1.36759e-128	2	Cct2
	1.6088e-132	0.256252	0.914	0.816	2.79834e-128	2	Tfg
	1.55034e-131	0.368237	0.856	0.786	2.69666e-127	2	Selenoh
	3.02057e-131	0.420593	0.96	0.949	5.25398e-127	2	Ube2s
	2.22821e-130	0.29351	0.89	0.802	3.87574e-126	2	Idh2
	3.75599e-130	0.317152	0.794	0.625	6.53316e-126	2	Hif1a
	7.27109e-130	0.325278	0.893	0.833	1.26473e-125	2	Lsm5
	1.07764e-129	0.299678	0.911	0.841	1.87444e-125	2	Cct3
	1.87886e-128	0.252309	0.665	0.41	3.2681e-124	2	Qsox1
	1.34188e-127	0.253901	0.781	0.552	2.33407e-123	2	Gcsh
	1.78981e-127	0.264889	0.802	0.601	3.1132e-123	2	Ufsp2
	9.37317e-126	0.321478	0.424	0.206	1.63037e-121	2	Rrm2
	7.20424e-125	0.263703	0.716	0.458	1.25311e-120	2	Basp1
	8.66957e-125	0.274384	0.753	0.516	1.50799e-120	2	Tmem263
	1.36131e-124	0.461618	0.554	0.334	2.36786e-120	2	Pclaf
	2.22025e-124	0.276445	0.906	0.831	3.8619e-120	2	Eif2s1
	3.382e-124	0.304718	0.944	0.918	5.88264e-120	2	Set
	8.20932e-124	0.259404	0.861	0.696	1.42793e-119	2	Slc39a7
	9.50357e-124	0.256089	0.921	0.846	1.65305e-119	2	Psmb7
	1.86798e-123	0.372713	0.84	0.718	3.24916e-119	2	Palld
	1.80523e-121	0.301242	0.667	0.398	3.14002e-117	2	Srpx2
	5.39646e-121	0.257134	0.809	0.596	9.3866e-117	2	Sec23a
	1.92274e-120	0.316571	0.903	0.867	3.34442e-116	2	Srsf7
	3.05426e-120	0.298616	0.961	0.951	5.31259e-116	2	Anp32b
	1.86292e-119	0.560338	0.679	0.483	3.24036e-115	2	Serpine1
	2.0587e-119	0.26659	0.69	0.454	3.5809e-115	2	Tmem123
	4.68229e-119	0.258602	0.656	0.414	8.14437e-115	2	Gar1
	1.56491e-118	0.291067	0.694	0.457	2.72201e-114	2	Alyref
	8.67054e-118	0.267485	0.834	0.672	1.50815e-113	2	Strap
	2.88796e-116	0.325981	0.97	0.965	5.02332e-112	2	Tuba1b
	5.72588e-115	0.254466	0.963	0.946	9.95959e-111	2	Cct5
	8.16929e-115	0.275284	0.836	0.683	1.42097e-110	2	Hacd1
	5.38701e-112	0.265965	0.773	0.587	9.37016e-108	2	Brix1
	5.51723e-112	0.4841	0.334	0.15	9.59667e-108	2	H19
	6.64707e-112	0.254139	0.63	0.397	1.15619e-107	2	Eef1e1
	7.51364e-112	0.250932	0.876	0.746	1.30692e-107	2	Magoh
	1.07238e-111	0.301624	0.779	0.61	1.8653e-107	2	Fkbp4
	4.31225e-111	0.269454	0.827	0.647	7.50074e-107	2	2011-09-01
	6.12647e-111	0.296864	0.634	0.409	1.06564e-106	2	Filip1l
	6.93682e-111	0.298484	0.733	0.541	1.20659e-106	2	Tyms
	7.07175e-111	1.28511	0.608	0.466	1.23006e-106	2	Spp1
	1.08932e-110	0.261805	0.952	0.935	1.89476e-106	2	Tomm20
	2.67068e-110	0.279759	0.561	0.332	4.64539e-106	2	Cited2
	3.17503e-110	0.33124	0.987	0.986	5.52265e-106	2	H2afz
	4.42416e-110	0.33754	0.79	0.624	7.69538e-106	2	Ccnd2
	2.41854e-109	0.27527	0.367	0.174	4.2068e-105	2	Ccna2
	3.35423e-109	0.330945	0.611	0.382	5.83434e-105	2	Fam46a
	1.15556e-107	0.250525	0.866	0.724	2.00999e-103	2	C1qtnf6
	3.02226e-107	0.252039	0.548	0.326	5.25691e-103	2	Nasp
	5.85084e-107	0.299411	0.618	0.385	1.01769e-102	2	Tgfbi
	4.5273e-106	0.377871	0.972	0.838	7.87479e-102	2	Postn
	4.83775e-105	0.271936	0.881	0.771	8.41479e-101	2	Tmem45a
	4.92669e-105	0.256563	0.798	0.612	8.56948e-101	2	Vasp
	9.22593e-104	0.283799	0.79	0.647	1.60476e-99	2	Snrpa1
	2.23599e-102	0.361531	0.944	0.938	3.88927e-98	2	Ncl
	4.48062e-102	0.260313	0.914	0.868	7.79359e-98	2	Phb2
	1.94035e-101	0.259091	0.686	0.464	3.37505e-97	2	Ppid
	9.91629e-101	0.301778	0.826	0.725	1.72484e-96	2	C1qbp
	1.52387e-99	0.305592	0.614	0.401	2.65062e-95	2	H2afx
	1.96133e-99	0.344417	0.49	0.289	3.41155e-95	2	Cenpa
	1.92028e-98	0.296736	0.395	0.205	3.34013e-94	2	Ccnb1
	2.48116e-98	0.332231	0.955	0.922	4.31573e-94	2	Id3
	1.2011e-97	0.255121	0.948	0.871	2.0892e-93	2	Dpysl3
	1.96969e-97	0.258349	0.838	0.718	3.42607e-93	2	Npm3
	3.33902e-94	0.253781	0.859	0.777	5.80788e-90	2	Eif4e
	2.29106e-93	0.418025	0.561	0.387	3.98507e-89	2	Birc5
	7.8714e-93	0.653875	0.677	0.562	1.36915e-88	2	Cxcl1
	2.44159e-92	0.296551	0.878	0.809	4.24691e-88	2	Mmp14
	4.54704e-92	0.280515	0.896	0.855	7.90912e-88	2	G3bp1
	1.67757e-88	0.337572	0.414	0.23	2.91797e-84	2	Cdc20
	1.08619e-87	0.274608	0.757	0.611	1.88932e-83	2	Dut
	2.46677e-87	0.340815	0.394	0.217	4.29071e-83	2	Ass1
	7.77047e-87	0.30213	0.559	0.352	1.35159e-82	2	Vegfd
	1.14834e-83	0.250011	0.78	0.643	1.99742e-79	2	Ebna1bp2
	3.17626e-83	0.280214	0.296	0.141	5.52478e-79	2	Plk1
	4.19249e-81	1.18906	0.635	0.567	7.29241e-77	2	Cxcl5
	4.4598e-81	0.339366	0.534	0.347	7.75738e-77	2	Cdk1
	6.56698e-77	0.30525	0.295	0.148	1.14226e-72	2	Rflnb
	1.15468e-71	0.327466	0.602	0.429	2.00845e-67	2	Wisp2
	1.63702e-71	0.312897	0.567	0.393	2.84743e-67	2	Cks2
	5.37982e-70	0.300114	0.857	0.837	9.35766e-66	2	Cks1b
	9.61971e-66	0.270314	0.725	0.583	1.67325e-61	2	Dclk1
	4.28981e-62	0.257057	0.621	0.448	7.46169e-58	2	Ccng1
	4.75495e-57	0.264079	0.385	0.234	8.27076e-53	2	Ube2c
	3.16105e-39	0.258932	0.606	0.501	5.49832e-35	2	Ndufa4l2
	1.66889e-38	0.300882	0.721	0.689	2.90286e-34	2	Angptl4
	1.74203e-26	0.316842	0.683	0.666	3.03009e-22	2	Hmgb2
	7.58573e-26	0.451985	0.766	0.771	1.31946e-21	2	Mt2
	7.30846e-17	0.255416	0.656	0.637	1.27123e-12	2	Il33
	9.56656e-17	0.614595	0.615	0.61	1.66401e-12	2	Hp
	4.04033e-12	0.552914	0.642	0.665	7.02775e-08	2	Ccl7
	0	1.84408	1	0.954	0	3	Gsn
	0	1.56364	0.997	0.606	0	3	Pi16
	0	1.39596	0.912	0.33	0	3	Smoc2
	0	1.2943	0.888	0.239	0	3	Sparcl1
	0	1.26326	0.965	0.553	0	3	Gstm1
	0	1.13112	0.928	0.576	0	3	Ckb
	0	1.11035	0.979	0.649	0	3	Col8a1
	0	1.08036	0.926	0.42	0	3	Ltbp4
	0	1.06143	0.861	0.38	0	3	Islr
	0	1.04091	0.778	0.185	0	3	Abca8a
	0	1.02009	0.996	0.71	0	3	Pmp22
	0	1.01019	1	0.924	0	3	Mfap5
	0	1.00497	0.637	0.169	0	3	G0s2
	0	0.996626	0.868	0.355	0	3	Prelp
	0	0.980291	0.996	0.689	0	3	Cd34
	0	0.968369	0.984	0.642	0	3	Aspn
	0	0.968064	0.633	0.256	0	3	Meox1
	0	0.962987	0.945	0.588	0	3	Tcf4
	0	0.954352	0.639	0.114	0	3	Pcsk6
	0	0.924478	0.9	0.559	0	3	Ifngr1
	0	0.919186	0.67	0.201	0	3	Pla1a
	0	0.91185	0.812	0.286	0	3	Qpct
	0	0.909003	0.857	0.437	0	3	Col15a1
	0	0.907091	0.856	0.432	0	3	Clec3b
	0	0.90663	0.935	0.467	0	3	Serpine2
	0	0.863464	0.98	0.697	0	3	Emp1
	0	0.851815	0.848	0.513	0	3	Adamts5
	0	0.828157	0.846	0.451	0	3	Pcolce2
	0	0.820908	0.822	0.328	0	3	Entpd2
	0	0.814604	0.512	0.077	0	3	Ackr4
	0	0.807698	0.834	0.4	0	3	Tcf21
	0	0.807541	0.976	0.665	0	3	Htra3
	0	0.796256	0.758	0.339	0	3	Tnxb
	0	0.788758	0.798	0.374	0	3	Lpl
	0	0.77946	0.957	0.563	0	3	Cygb
	0	0.770528	0.943	0.632	0	3	Lamc1
	0	0.767676	1	0.999	0	3	Dcn
	0	0.760676	0.68	0.195	0	3	Ace
	0	0.754011	0.854	0.432	0	3	Dpep1
	0	0.753465	0.99	0.836	0	3	Ugp2
	0	0.747491	0.789	0.374	0	3	Ms4a4d
	0	0.745794	0.847	0.466	0	3	Col4a1
	0	0.738355	0.999	0.991	0	3	Pcolce
	0	0.730143	0.696	0.243	0	3	Lama2
	0	0.729193	0.566	0.129	0	3	Vwa1
	0	0.720313	0.963	0.609	0	3	Pdlim2
	0	0.717367	0.786	0.416	0	3	Lpar1
	0	0.712353	0.999	0.859	0	3	Crip2
	0	0.691501	0.896	0.575	0	3	Cpq
	0	0.681977	0.504	0.142	0	3	Adamtsl2
	0	0.679001	0.988	0.749	0	3	Zbtb20
	0	0.678753	0.964	0.697	0	3	Cd302
	0	0.661804	0.323	0.048	0	3	Hsd11b1
	0	0.648568	0.604	0.223	0	3	Spry1
	0	0.640366	0.997	0.873	0	3	Sdc2
	0	0.629828	0.939	0.566	0	3	Fxyd1
	0	0.62532	0.998	0.948	0	3	Gpx3
	0	0.623736	0.377	0.075	0	3	Efhd1
	0	0.620014	0.999	0.902	0	3	Cd9
	0	0.613271	0.993	0.743	0	3	Rarres2
	0	0.60415	0.458	0.089	0	3	6030408B16Rik
	0	0.602936	0.987	0.812	0	3	Oaf
	0	0.567514	1	0.991	0	3	Igfbp7
	0	0.534297	1	0.979	0	3	2007-09-01
	0	0.509811	1	0.998	0	3	Itm2b
	0	0.479731	1	1	0	3	Cd81
	0	0.430346	0.343	0.056	0	3	Cmklr1
	0	0.418245	0.351	0.053	0	3	Tmem204
	0	0.415377	0.323	0.046	0	3	Hmcn2
	5.31868e-306	0.638053	0.999	0.967	9.25131e-302	3	Fbln2
	1.31827e-304	0.782462	0.968	0.671	2.29299e-300	3	Pam
	1.64443e-303	0.563765	1	0.996	2.86031e-299	3	Bgn
	1.08412e-302	0.43779	0.999	1	1.88571e-298	3	Anxa5
	6.64615e-299	0.828683	0.655	0.303	1.15603e-294	3	Selenbp1
	7.6854e-299	0.881267	0.621	0.269	1.3368e-294	3	Ccnd1
	7.00992e-292	0.356256	0.307	0.05	1.21931e-287	3	Abca8b
	6.09933e-283	0.618355	0.953	0.761	1.06092e-278	3	Axl
	2.53797e-281	0.545291	0.987	0.826	4.41454e-277	3	Rnase4
	5.5025e-280	0.813929	0.999	0.812	9.57105e-276	3	Ifi27l2a
	7.36846e-277	0.661432	0.748	0.401	1.28167e-272	3	Ramp2
	5.10036e-273	0.649906	0.758	0.409	8.87157e-269	3	Srpx2
	1.95347e-267	0.566811	0.998	0.838	3.39787e-263	3	Serping1
	1.70406e-264	0.534136	0.914	0.571	2.96404e-260	3	Itm2a
	8.49166e-263	0.586565	0.953	0.648	1.47704e-258	3	Ogn
	1.8272e-261	0.565701	1	0.904	3.17823e-257	3	Lum
	1.84264e-260	0.539405	0.476	0.152	3.20509e-256	3	1500009L16Rik
	9.57829e-259	0.59114	0.83	0.489	1.66605e-254	3	Plpp3
	2.66505e-258	0.657743	0.627	0.288	4.63559e-254	3	Camk2n1
	5.89384e-256	0.435381	0.999	0.977	1.02517e-251	3	Lamp1
	5.37997e-253	0.617767	0.783	0.441	9.35791e-249	3	Fbln5
	1.0608e-250	0.421751	1	0.978	1.84515e-246	3	Cyb5a
	1.37072e-244	0.508875	0.997	0.908	2.38423e-240	3	S100a16
	4.88519e-244	0.821714	0.382	0.104	8.49731e-240	3	Cst6
	1.0542e-242	0.628503	0.825	0.603	1.83368e-238	3	Aldh2
	3.57466e-242	0.522799	0.346	0.084	6.21776e-238	3	Kcnk2
	1.44357e-240	0.469725	0.996	0.921	2.51094e-236	3	Lhfp
	1.00378e-236	0.507819	0.534	0.213	1.74598e-232	3	Rora
	6.6178e-234	0.690645	0.653	0.328	1.1511e-229	3	Fibin
	2.43112e-233	0.509403	0.967	0.708	4.22869e-229	3	Mmp2
	6.59514e-233	0.494157	0.968	0.791	1.14716e-228	3	Sptbn1
	7.03532e-223	0.494131	0.924	0.684	1.22372e-218	3	Nid1
	8.85015e-213	0.478025	0.911	0.659	1.5394e-208	3	Slc43a3
	1.15366e-211	0.503833	0.936	0.635	2.00667e-207	3	Gpm6b
	3.24076e-211	0.481454	0.868	0.667	5.63698e-207	3	Tprgl
	3.20916e-209	0.547314	0.97	0.678	5.58202e-205	3	Ebf1
	7.97447e-209	0.521197	0.462	0.168	1.38708e-204	3	Ppp1r14a
	1.53581e-203	0.469104	0.833	0.625	2.67138e-199	3	Sgce
	3.49457e-202	0.527367	0.992	0.895	6.07846e-198	3	Fbn1
	1.40672e-198	0.321485	1	1	2.44685e-194	3	Myl12a
	1.29393e-197	0.443813	0.98	0.86	2.25066e-193	3	Aes
	2.28138e-196	0.351331	0.273	0.06	3.96823e-192	3	Gsta3
	5.91765e-195	0.445342	0.389	0.124	1.02932e-190	3	Bmp4
	1.97698e-193	0.520297	0.691	0.424	3.43875e-189	3	Slc29a1
	1.45027e-190	0.441483	0.997	0.877	2.5226e-186	3	Col6a1
	2.71616e-189	0.512525	0.607	0.304	4.72449e-185	3	C1qtnf2
	8.30618e-188	0.279724	1	0.997	1.44478e-183	3	Cst3
	1.91082e-187	0.605284	0.684	0.468	3.32367e-183	3	Lamb1
	3.39944e-184	0.372487	1	0.969	5.91299e-180	3	Loxl1
	3.29893e-183	0.490745	0.463	0.193	5.73816e-179	3	Jup
	1.40114e-180	0.55861	0.678	0.409	2.43715e-176	3	Cp
	1.98298e-177	0.506622	0.639	0.373	3.4492e-173	3	Zeb1
	4.70682e-175	0.355461	0.323	0.089	8.18704e-171	3	Scara5
	1.31545e-174	0.419926	1	0.993	2.28809e-170	3	Tuba1a
	1.3206e-174	0.460533	0.869	0.69	2.29705e-170	3	Lrp1
	2.24876e-174	0.455031	0.789	0.576	3.9115e-170	3	Gng11
	4.66051e-173	0.332456	0.289	0.076	8.10648e-169	3	Abca6
	8.86381e-173	0.410774	0.917	0.764	1.54177e-168	3	Degs1
	9.35988e-172	0.440065	0.93	0.741	1.62806e-167	3	Ddah2
	7.43898e-169	0.52837	0.533	0.265	1.29394e-164	3	Tsc22d3
	7.44748e-167	0.377629	0.987	0.784	1.29541e-162	3	Igfbp4
	5.39548e-164	0.381967	0.331	0.103	9.3849e-160	3	Heyl
	3.78962e-163	0.250132	0.253	0.06	6.59166e-159	3	Col4a4
	6.52803e-163	0.447883	0.312	0.094	1.13548e-158	3	Pgf
	7.65316e-163	0.530622	0.984	0.884	1.33119e-158	3	Anxa3
	5.91786e-162	0.394955	0.975	0.799	1.02935e-157	3	Ahnak
	1.08623e-161	0.346522	0.989	0.917	1.88939e-157	3	Tmem50a
	1.25381e-161	0.371596	0.987	0.841	2.18087e-157	3	Myl12b
	1.70142e-158	0.552738	0.62	0.354	2.95945e-154	3	Crispld2
	2.06165e-158	0.382838	0.883	0.663	3.58604e-154	3	Itgb5
	3.11968e-158	0.479483	0.768	0.58	5.42637e-154	3	Mxra7
	3.69794e-157	0.278229	1	0.992	6.4322e-153	3	Capns1
	5.26e-157	0.384816	0.984	0.868	9.14924e-153	3	S100a13
	6.75982e-157	0.420131	0.965	0.836	1.1758e-152	3	Mtch1
	5.81648e-154	0.253265	1	0.999	1.01172e-149	3	mt-Nd1
	2.01175e-153	0.378422	0.916	0.692	3.49924e-149	3	Fcgrt
	3.62419e-153	0.347257	0.95	0.713	6.30391e-149	3	Cfh
	6.58243e-153	0.329117	0.321	0.101	1.14495e-148	3	Lims2
	7.19554e-152	0.267001	0.266	0.071	1.25159e-147	3	Tek
	1.01918e-151	0.371623	0.993	0.873	1.77277e-147	3	Mxra8
	1.09729e-151	0.373731	1	0.968	1.90863e-147	3	Ccdc80
	4.24064e-151	0.489381	0.729	0.503	7.37617e-147	3	Fhl1
	8.17309e-151	0.387416	0.934	0.745	1.42163e-146	3	Uap1
	1.59911e-149	0.472993	0.664	0.411	2.7815e-145	3	Plxdc2
	7.183e-146	0.289484	1	0.988	1.24941e-141	3	Selenom
	3.75132e-144	0.34047	0.681	0.369	6.52504e-140	3	Fxyd6
	3.39119e-143	0.399364	0.953	0.766	5.89863e-139	3	Lsp1
	2.32045e-141	0.400806	0.988	0.847	4.03618e-137	3	Col6a2
	7.34631e-140	0.346023	1	0.993	1.27782e-135	3	Fstl1
	7.74376e-140	0.40197	0.823	0.543	1.34695e-135	3	Tppp3
	3.61718e-138	0.325269	0.998	0.75	6.29172e-134	3	Dpt
	3.76034e-135	0.306256	0.999	0.993	6.54073e-131	3	Tspo
	1.23086e-133	0.404268	0.886	0.735	2.14097e-129	3	Hspg2
	2.99469e-133	0.335663	0.983	0.894	5.20897e-129	3	Rap1a
	5.79305e-133	0.391181	0.437	0.198	1.00764e-128	3	Tbx20
	1.04263e-132	0.480183	0.988	0.887	1.81355e-128	3	Ier2
	1.67993e-132	0.643162	0.576	0.34	2.92208e-128	3	Ackr3
	3.6908e-132	0.253724	1	0.992	6.41977e-128	3	Tmem59
	1.14554e-131	0.415458	0.277	0.087	1.99255e-127	3	Htra4
	1.17746e-128	0.314116	0.916	0.668	2.04807e-124	3	Sod3
	6.73195e-128	0.619652	0.639	0.41	1.17096e-123	3	Ctgf
	4.78691e-127	0.310134	1	0.948	8.32635e-123	3	Serpinf1
	1.55384e-126	0.364482	0.881	0.694	2.70275e-122	3	Myadm
	5.66803e-125	0.318447	0.999	0.981	9.85898e-121	3	Rhoa
	1.23369e-124	0.252608	0.273	0.084	2.14589e-120	3	1700019D03Rik
	1.45915e-123	0.301238	1	0.988	2.53804e-119	3	Cavin3
	1.3307e-122	0.300423	0.958	0.797	2.31461e-118	3	Plpp1
	2.71038e-121	0.337683	0.88	0.659	4.71443e-117	3	Ypel3
	5.39412e-121	0.320306	0.371	0.151	9.38253e-117	3	Svep1
	1.98452e-120	0.488318	0.717	0.576	3.45188e-116	3	Dpysl2
	2.90558e-120	0.346605	0.429	0.199	5.05396e-116	3	Scn7a
	1.56093e-119	0.407817	0.689	0.524	2.71508e-115	3	Fgfr1
	2.56314e-119	0.397135	0.282	0.098	4.45833e-115	3	Stc2
	3.70562e-119	0.275406	0.295	0.104	6.44555e-115	3	Tril
	6.09787e-119	0.386212	0.788	0.626	1.06066e-114	3	Vcan
	1.53056e-117	0.400055	0.702	0.558	2.66226e-113	3	Tpst1
	9.4605e-116	0.340171	0.361	0.154	1.64556e-111	3	Nr1d1
	1.70752e-115	0.460839	0.621	0.453	2.97007e-111	3	Lama4
	4.06972e-115	0.374647	0.512	0.291	7.07887e-111	3	Naalad2
	2.35757e-114	0.376547	0.86	0.734	4.10075e-110	3	Nfic
	4.65046e-112	0.369064	0.465	0.236	8.08901e-108	3	Ecm2
	6.37562e-112	0.323793	0.976	0.752	1.10897e-107	3	Ly6a
	7.66395e-112	0.430614	0.518	0.311	1.33307e-107	3	Eng
	5.32834e-110	0.253336	1	0.995	9.26812e-106	3	Anxa1
	2.42775e-107	0.441933	0.981	0.789	4.22283e-103	3	Cyr61
	3.75592e-107	0.400965	0.542	0.331	6.53305e-103	3	Col4a2
	5.75541e-107	0.325351	0.932	0.769	1.0011e-102	3	Phlda3
	1.29102e-104	0.327292	0.88	0.782	2.24561e-100	3	Drap1
	1.0656e-103	0.309316	0.483	0.25	1.85351e-99	3	Itih5
	3.62049e-101	0.401836	0.594	0.418	6.29748e-97	3	Nav1
	9.36494e-100	0.314477	0.891	0.715	1.62894e-95	3	Emilin1
	1.98187e-99	0.262254	0.961	0.771	3.44726e-95	3	Adamts2
	4.81022e-99	0.560331	0.402	0.193	8.36689e-95	3	Cilp
	7.44986e-99	0.276315	0.333	0.14	1.29583e-94	3	Ablim1
	1.65386e-97	0.285479	0.999	0.984	2.87673e-93	3	Jund
	5.21226e-97	0.300981	0.353	0.166	9.0662e-93	3	Fam20c
	1.43716e-96	0.392518	0.655	0.458	2.4998e-92	3	Aldh1a1
	9.46019e-96	0.402195	0.529	0.345	1.64551e-91	3	Lysmd2
	1.981e-95	0.272836	0.973	0.898	3.44575e-91	3	Rsu1
	4.41579e-94	0.256288	0.994	0.965	7.68083e-90	3	mt-Nd2
	1.10372e-93	0.336649	0.502	0.289	1.91982e-89	3	C1qtnf7
	1.57678e-93	0.258374	0.981	0.837	2.74265e-89	3	Olfml3
	2.09438e-92	0.385445	0.984	0.895	3.64297e-88	3	Jun
	2.67225e-92	0.398744	0.498	0.322	4.64811e-88	3	Ubl3
	4.73628e-91	0.288285	0.909	0.715	8.23829e-87	3	Pmepa1
	8.91548e-91	0.269642	0.992	0.92	1.55076e-86	3	Smim14
	1.01318e-90	0.275105	0.979	0.874	1.76232e-86	3	Marcks
	1.69137e-90	0.375466	0.711	0.553	2.94197e-86	3	Nbl1
	2.91222e-89	0.262678	0.935	0.838	5.06552e-85	3	Rab18
	8.06944e-89	0.322275	0.808	0.703	1.4036e-84	3	Asah1
	1.99261e-88	0.259969	0.903	0.787	3.46595e-84	3	Sptssa
	4.62712e-88	0.258461	0.986	0.924	8.0484e-84	3	Tspan3
	1.00124e-87	0.370746	0.768	0.57	1.74155e-83	3	Klf4
	1.36096e-87	0.276745	0.927	0.832	2.36726e-83	3	Rab7
	1.09289e-85	0.358498	0.978	0.828	1.90098e-81	3	Klf2
	5.16557e-85	0.268947	0.908	0.82	8.985e-81	3	Smim7
	6.02751e-84	0.261246	0.912	0.785	1.04842e-79	3	Cox20
	2.6017e-83	0.25818	0.95	0.859	4.52539e-79	3	Tm2d2
	2.96601e-83	0.28887	0.745	0.581	5.15907e-79	3	Matn2
	3.30249e-83	0.36532	0.425	0.254	5.74436e-79	3	Gm14005
	6.69859e-83	0.432071	0.523	0.368	1.16515e-78	3	F2r
	8.71297e-82	0.336858	0.605	0.478	1.51553e-77	3	Rab28
	3.68619e-81	0.289353	0.817	0.693	6.41176e-77	3	Celf2
	4.8425e-81	0.260797	0.987	0.924	8.42304e-77	3	Kif5b
	1.18875e-78	0.263955	0.991	0.942	2.06771e-74	3	Cd47
	6.90421e-78	0.403197	0.619	0.44	1.20092e-73	3	Cd55
	1.62806e-77	0.290444	0.778	0.667	2.83185e-73	3	Cltb
	4.04078e-77	0.334413	0.732	0.616	7.02853e-73	3	Gstm2
	9.40711e-77	0.262772	0.818	0.718	1.63627e-72	3	Smim11
	2.81042e-75	0.250315	0.832	0.675	4.88844e-71	3	Nfix
	4.29417e-75	0.319662	0.449	0.279	7.46929e-71	3	Adcy7
	7.92336e-75	0.315588	0.627	0.502	1.37819e-70	3	Ginm1
	1.30448e-74	0.327272	0.673	0.576	2.26901e-70	3	Ppp1r2
	1.45373e-74	0.25307	0.967	0.873	2.52861e-70	3	Ilk
	3.58087e-72	0.330451	0.404	0.241	6.22857e-68	3	Rab23
	8.76135e-72	0.253688	0.996	0.942	1.52395e-67	3	Ecm1
	4.24923e-71	0.262328	0.842	0.725	7.39112e-67	3	Eif1b
	1.276e-70	0.318895	0.629	0.507	2.21947e-66	3	Sntb2
	5.80405e-70	0.256632	0.34	0.175	1.00956e-65	3	B3gnt8
	6.96822e-70	0.316617	0.434	0.27	1.21205e-65	3	Pqlc3
	1.30392e-69	0.29052	0.813	0.704	2.26803e-65	3	Dbn1
	2.19438e-69	0.337538	0.698	0.609	3.81691e-65	3	Ptp4a1
	2.87931e-69	0.266237	0.996	0.972	5.00826e-65	3	Uqcc2
	1.14895e-67	0.353304	0.464	0.312	1.99849e-63	3	Tmem64
	1.26007e-65	0.288431	0.688	0.592	2.19176e-61	3	Ggh
	1.55849e-65	0.342585	0.299	0.148	2.71083e-61	3	Dbp
	1.13148e-64	0.285938	0.73	0.655	1.96809e-60	3	Spop
	2.51693e-64	0.266291	0.814	0.723	4.37795e-60	3	Bcl7c
	4.0144e-64	0.303743	0.435	0.28	6.98265e-60	3	Pink1
	7.5088e-64	0.405343	0.355	0.198	1.30608e-59	3	Bhlhe41
	2.18219e-63	0.250623	0.869	0.687	3.79569e-59	3	Nfia
	2.9876e-62	0.288503	0.427	0.27	5.19664e-58	3	Acvrl1
	9.59349e-62	0.303323	0.671	0.602	1.66869e-57	3	Pea15a
	2.11585e-60	0.258291	0.7	0.6	3.68031e-56	3	Slc1a5
	1.13584e-59	0.251796	0.381	0.222	1.97569e-55	3	Ebf2
	8.61639e-56	0.311473	0.483	0.349	1.49874e-51	3	Arap1
	7.29638e-55	0.255498	0.391	0.248	1.26913e-50	3	Eps15
	1.42851e-53	0.36476	0.494	0.374	2.48476e-49	3	Angptl2
	2.36845e-51	0.287522	0.614	0.545	4.11969e-47	3	Smim10l1
	5.81544e-51	0.291623	0.45	0.323	1.01154e-46	3	Arhgef40
	2.06213e-50	0.264492	0.722	0.671	3.58687e-46	3	Tusc3
	4.13164e-49	0.270529	0.378	0.248	7.18657e-45	3	Rgmb
	7.97037e-49	0.289885	0.597	0.512	1.38637e-44	3	Ndn
	3.76858e-48	0.289723	0.536	0.451	6.55507e-44	3	Pon2
	3.17401e-47	0.272101	0.622	0.531	5.52088e-43	3	Medag
	3.25018e-46	0.298655	0.994	0.956	5.65336e-42	3	Junb
	8.79658e-46	0.279785	0.589	0.489	1.53008e-41	3	Vamp5
	5.54829e-45	0.250494	0.759	0.619	9.6507e-41	3	Hes1
	3.10309e-44	0.284575	0.528	0.428	5.39751e-40	3	Klf13
	3.26507e-44	0.264295	0.396	0.273	5.67926e-40	3	Cyth3
	3.32404e-44	0.284007	0.583	0.521	5.78184e-40	3	Tmod3
	3.79625e-44	0.268407	0.66	0.611	6.60319e-40	3	Ccnd3
	5.11207e-44	0.255699	0.795	0.662	8.89194e-40	3	Cebpd
	1.59453e-43	0.263701	0.561	0.481	2.77353e-39	3	Atp6ap2
	5.24321e-43	0.278327	0.972	0.85	9.12004e-39	3	Postn
	4.27694e-41	0.267297	0.311	0.195	7.43931e-37	3	Zfp385a
	2.09834e-40	0.35772	0.453	0.33	3.64985e-36	3	Ly6c1
	8.70018e-40	0.250349	0.468	0.359	1.51331e-35	3	Ghr
	7.08475e-39	0.273539	0.429	0.312	1.23232e-34	3	Creb5
	9.18128e-35	0.287482	0.507	0.422	1.59699e-30	3	Ifi205
	2.64787e-34	0.285969	0.337	0.226	4.6057e-30	3	Lrrn4cl
	5.7488e-34	0.257202	0.39	0.278	9.99947e-30	3	Sox9
	2.13992e-33	0.251798	0.478	0.398	3.72217e-29	3	Ddr2
	2.54394e-32	0.255133	0.566	0.532	4.42494e-28	3	Rnf11
	3.23988e-32	0.267744	0.46	0.38	5.63545e-28	3	Creb3l2
	9.7406e-32	0.257376	0.354	0.252	1.69428e-27	3	Gm26532
	5.12039e-27	0.256015	0.515	0.456	8.9064e-23	3	Bhlhe40
	6.21744e-27	0.284652	0.491	0.443	1.08146e-22	3	Vgll3
	6.88704e-27	0.282286	0.311	0.211	1.19793e-22	3	Sema3c
	9.81907e-26	0.295679	0.263	0.172	1.70793e-21	3	Crlf1
	2.82583e-24	0.280962	0.432	0.36	4.91524e-20	3	Thy1
	8.64004e-23	0.2913	0.346	0.257	1.50285e-18	3	Tmem100
	2.03574e-20	0.292173	0.291	0.209	3.54096e-16	3	Adm
	0	1.35293	0.849	0.468	0	4	Cd44
	0	0.85993	0.72	0.308	0	4	Aqp1
	0	0.60112	1	1	0	4	Crip1
	0	0.580618	1	0.999	0	4	S100a6
	0	0.509253	0.332	0.052	0	4	AA467197
	1.16465e-291	0.414728	0.375	0.076	2.0258e-287	4	Cd80
	1.29773e-287	0.52034	1	1	2.25727e-283	4	Col1a2
	4.03673e-283	0.524612	1	1	7.02149e-279	4	Col3a1
	1.35682e-276	0.650533	0.755	0.369	2.36006e-272	4	Col5a3
	6.76046e-273	1.21904	0.872	0.6	1.17591e-268	4	Tnfaip6
	2.50783e-269	0.67549	0.426	0.11	4.36212e-265	4	Nov
	1.86674e-264	0.523038	1	1	3.24701e-260	4	Col1a1
	1.29832e-261	0.630067	1	0.991	2.2583e-257	4	Timp1
	1.04728e-256	1.04132	0.606	0.248	1.82164e-252	4	Crabp2
	1.81141e-255	0.966319	0.938	0.761	3.15077e-251	4	Ly6a
	1.06793e-249	0.530421	0.987	0.872	1.85756e-245	4	Col5a1
	1.52831e-236	0.539053	0.95	0.785	2.65834e-232	4	Loxl2
	1.79007e-235	0.39583	1	1	3.11365e-231	4	Tmsb4x
	3.70351e-230	0.660673	0.44	0.135	6.44188e-226	4	Stmn4
	2.99945e-227	0.435257	1	1	5.21724e-223	4	Anxa2
	1.48725e-220	0.431593	1	0.993	2.58693e-216	4	Fstl1
	4.3372e-216	0.584429	0.89	0.634	7.54412e-212	4	Col14a1
	3.62207e-212	0.451202	0.999	0.993	6.30022e-208	4	Sh3bgrl3
	3.7014e-212	0.552427	0.944	0.685	6.43821e-208	4	Ebf1
	1.00548e-204	0.267221	0.281	0.058	1.74893e-200	4	Adgrf5
	4.82126e-201	0.724705	0.973	0.911	8.38609e-197	4	Ugdh
	2.07843e-198	0.47471	0.995	0.913	3.61523e-194	4	Cthrc1
	7.27359e-198	0.528206	0.916	0.733	1.26517e-193	4	Prrx1
	7.85223e-198	0.477472	1	0.992	1.36582e-193	4	S100a10
	7.04721e-196	0.592321	0.761	0.43	1.22579e-191	4	Tnc
	3.46491e-194	0.446428	0.992	0.944	6.02687e-190	4	Serpinb6a
	1.11345e-190	0.420235	0.997	0.956	1.93673e-186	4	Col5a2
	1.96124e-190	0.612396	0.806	0.533	3.41138e-186	4	Cd248
	9.87062e-190	0.609253	0.935	0.775	1.7169e-185	4	Fxyd5
	4.65669e-182	0.467339	0.931	0.711	8.09985e-178	4	P4ha2
	5.66687e-179	0.678612	0.625	0.305	9.85695e-175	4	Ly6c1
	9.63061e-176	0.636363	0.906	0.679	1.67515e-171	4	Serpinb1a
	4.27668e-175	0.357269	1	0.997	7.43886e-171	4	Txn1
	2.89626e-169	0.762344	0.824	0.546	5.03776e-165	4	Tppp3
	2.09825e-166	0.402516	1	0.986	3.64969e-162	4	Fn1
	1.78185e-165	0.379678	1	1	3.09934e-161	4	Vim
	3.74152e-165	0.410141	0.554	0.258	6.50801e-161	4	Rai14
	4.58233e-159	0.30578	1	0.998	7.9705e-155	4	Sec61b
	3.26213e-158	0.374492	0.585	0.281	5.67414e-154	4	Enah
	6.75428e-156	0.282202	1	1	1.17484e-151	4	S100a11
	4.96189e-155	0.512107	0.861	0.693	8.63071e-151	4	Atp2b1
	4.59387e-154	0.433502	0.743	0.413	7.99058e-150	4	Glipr1
	7.23422e-152	0.425971	0.786	0.507	1.25832e-147	4	Medag
	4.17846e-147	0.271382	0.37	0.13	7.26801e-143	4	Lgi3
	1.63305e-145	0.268957	1	1	2.84053e-141	4	Calm1
	1.87258e-144	0.296494	1	1	3.25717e-140	4	Rpl41
	3.22412e-141	0.502242	0.643	0.365	5.60803e-137	4	Gja1
	3.0691e-140	0.378141	0.679	0.402	5.3384e-136	4	Ext1
	4.62073e-136	0.34252	0.456	0.196	8.0373e-132	4	Ank2
	1.52641e-135	0.286186	0.999	0.997	2.65503e-131	4	Atox1
	3.57826e-134	0.29069	0.436	0.181	6.22403e-130	4	Ndrg4
	1.85628e-131	0.308896	0.416	0.172	3.22881e-127	4	Tnfrsf23
	8.78591e-125	0.387602	0.919	0.712	1.52822e-120	4	Ctsh
	1.00035e-124	0.493099	0.672	0.422	1.74e-120	4	Scd2
	2.22278e-122	0.412213	0.951	0.838	3.8663e-118	4	Capg
	2.85984e-120	0.463545	0.624	0.37	4.97441e-116	4	Pdlim4
	1.06693e-119	0.411648	0.986	0.979	1.85581e-115	4	Rtn4
	1.70237e-119	0.28178	1	1	2.9611e-115	4	Rpl38
	3.93226e-116	0.318866	0.525	0.268	6.83978e-112	4	Flnb
	6.65981e-116	0.495859	0.671	0.412	1.15841e-111	4	S100a4
	2.10709e-115	0.309879	0.975	0.926	3.66508e-111	4	Calu
	2.14892e-115	0.354978	0.632	0.373	3.73783e-111	4	Lasp1
	3.4361e-115	0.35625	0.873	0.698	5.97675e-111	4	Myadm
	4.38988e-115	0.375325	0.897	0.718	7.63576e-111	4	Glipr2
	8.83902e-115	0.382345	0.841	0.647	1.53746e-110	4	Cavin1
	1.08435e-113	0.339131	0.968	0.876	1.88612e-109	4	Dpysl3
	2.61689e-112	0.448513	0.816	0.608	4.55182e-108	4	Col6a3
	9.96263e-112	0.294112	0.987	0.896	1.7329e-107	4	Fbn1
	8.21521e-110	0.301965	0.4	0.174	1.42895e-105	4	Ttyh2
	3.51689e-109	0.325792	0.975	0.845	6.11728e-105	4	Igfbp6
	5.16543e-109	0.426466	0.563	0.322	8.98476e-105	4	Ecscr
	5.5493e-109	0.697052	0.814	0.654	9.65246e-105	4	Prss23
	7.94086e-107	0.299968	0.639	0.362	1.38123e-102	4	Bcat1
	1.4684e-106	0.43752	0.897	0.78	2.55413e-102	4	Klf6
	2.73902e-106	0.367501	0.942	0.833	4.76425e-102	4	Ppa1
	3.70868e-104	0.309547	0.551	0.314	6.45088e-100	4	2009-09-01
	6.62245e-104	0.273127	0.45	0.212	1.15191e-99	4	Lrrc32
	1.4043e-103	0.338659	0.643	0.403	2.44264e-99	4	Ywhag
	2.64703e-102	0.342863	0.951	0.869	4.60424e-98	4	Bmp1
	3.66997e-102	0.30738	0.554	0.31	6.38355e-98	4	Smad1
	3.6827e-101	0.32929	0.91	0.821	6.40569e-97	4	Wls
	1.28196e-100	0.33228	0.64	0.396	2.22984e-96	4	Vcl
	6.1374e-99	0.334734	0.988	0.941	1.06754e-94	4	Higd1a
	6.87397e-99	0.250957	0.991	0.937	1.19566e-94	4	Tpm2
	9.49969e-99	0.337647	0.685	0.452	1.65238e-94	4	Aig1
	2.96933e-98	0.321365	0.945	0.805	5.16486e-94	4	Ahnak
	7.07819e-98	0.37959	0.649	0.437	1.23118e-93	4	Agpat4
	2.1003e-95	0.280069	0.413	0.197	3.65327e-91	4	Cgref1
	4.97176e-93	0.380518	0.536	0.311	8.64788e-89	4	Scara3
	5.40134e-93	0.334167	0.648	0.416	9.39508e-89	4	Tubb2b
	1.1225e-92	0.323726	0.957	0.758	1.95247e-88	4	Dpt
	1.20759e-92	0.352022	0.643	0.396	2.10048e-88	4	Hk2
	1.61965e-92	0.291599	1	0.999	2.81722e-88	4	Rps27l
	1.93817e-92	0.259501	0.446	0.224	3.37125e-88	4	Dcbld2
	9.91775e-91	0.368456	0.629	0.378	1.72509e-86	4	Ccl9
	1.68456e-90	0.315165	0.807	0.615	2.93012e-86	4	Iqgap1
	4.91952e-90	0.341797	0.588	0.363	8.55702e-86	4	Acly
	5.07271e-90	0.364426	0.993	0.981	8.82348e-86	4	Lmna
	6.82699e-90	0.305737	0.775	0.585	1.18749e-85	4	Mcub
	5.77451e-89	0.621384	0.634	0.412	1.00442e-84	4	Cdkn1a
	2.67315e-88	0.331795	0.916	0.816	4.64967e-84	4	Cox17
	5.31394e-87	0.422755	0.763	0.595	9.24306e-83	4	Rhob
	8.497e-87	0.333833	0.973	0.913	1.47797e-82	4	S100a16
	2.01196e-86	0.395319	0.44	0.227	3.4996e-82	4	Mustn1
	1.16127e-84	0.308794	0.447	0.239	2.01991e-80	4	Adora2b
	1.19756e-84	0.442366	0.93	0.822	2.08303e-80	4	Oaf
	2.73706e-82	0.317629	0.659	0.444	4.76085e-78	4	BC005537
	1.1092e-81	0.263419	0.65	0.405	1.92935e-77	4	Fam198b
	9.02342e-81	0.723917	0.622	0.449	1.56953e-76	4	Fdps
	2.13093e-80	0.266095	0.996	0.995	3.70655e-76	4	Usmg5
	2.80322e-80	0.286846	0.844	0.727	4.87591e-76	4	Mtpn
	4.70269e-80	0.415319	0.6	0.37	8.17985e-76	4	Lgals3
	6.04067e-79	0.277285	0.993	0.986	1.05071e-74	4	Rhoc
	6.6968e-79	0.347322	0.998	0.993	1.16484e-74	4	Emp3
	1.18202e-78	0.320913	0.63	0.415	2.05601e-74	4	Tgfb2
	5.72083e-78	0.594834	0.462	0.262	9.95081e-74	4	Inhba
	5.03393e-77	0.326507	0.975	0.865	8.75603e-73	4	Crip2
	5.8571e-76	0.69349	0.504	0.311	1.01878e-71	4	Des
	9.35072e-75	0.273761	0.526	0.317	1.62646e-70	4	B4galt5
	4.56868e-74	0.357317	0.556	0.352	7.94677e-70	4	Itga5
	6.62924e-73	0.321122	0.586	0.395	1.15309e-68	4	Plec
	2.53697e-72	0.262676	0.816	0.623	4.4128e-68	4	Vcan
	1.2297e-71	0.27337	0.396	0.208	2.13895e-67	4	Rcan1
	4.03866e-71	0.277497	0.583	0.377	7.02484e-67	4	Vasn
	4.48813e-71	0.291918	0.949	0.901	7.80665e-67	4	Rap1a
	6.52557e-71	0.258428	0.596	0.386	1.13506e-66	4	Ptprs
	2.13203e-70	0.260394	0.882	0.776	3.70845e-66	4	Flna
	3.54301e-70	0.442631	0.686	0.499	6.16272e-66	4	Rras2
	4.36752e-69	0.253216	0.631	0.418	7.59686e-65	4	Sulf1
	8.72803e-69	0.300812	0.965	0.931	1.51815e-64	4	Psmd8
	2.06364e-67	0.471264	0.711	0.552	3.58949e-63	4	Thbs1
	4.03839e-67	0.454693	0.48	0.3	7.02438e-63	4	Hmgcs1
	5.92555e-66	0.29607	0.625	0.439	1.03069e-61	4	Hnrnpa0
	1.86759e-65	0.255866	0.934	0.85	3.24848e-61	4	Msn
	2.36948e-65	0.36222	0.848	0.732	4.12148e-61	4	Heg1
	4.38507e-65	0.259661	0.504	0.301	7.6274e-61	4	Creb5
	1.31122e-64	0.29118	0.931	0.883	2.28074e-60	4	Marcks
	1.65255e-64	0.294085	0.959	0.88	2.87444e-60	4	Sdc2
	2.37812e-63	0.324299	0.439	0.264	4.13651e-59	4	Cyp51
	5.32174e-63	0.350366	0.324	0.167	9.25664e-59	4	Idi1
	1.83161e-62	0.267824	0.801	0.644	3.18591e-58	4	Clic4
	2.57265e-62	0.273383	0.622	0.432	4.47486e-58	4	Sdc1
	4.18708e-60	0.33899	0.695	0.498	7.28301e-56	4	Ndufa4l2
	1.59834e-59	0.252105	0.485	0.299	2.78015e-55	4	Pdgfa
	1.7506e-57	0.288081	0.335	0.18	3.04499e-53	4	Sqle
	1.42172e-56	0.340537	0.55	0.37	2.47295e-52	4	Tubb3
	9.18378e-54	0.441984	0.668	0.505	1.59743e-49	4	Serpine1
	1.08041e-48	0.303268	0.86	0.792	1.87926e-44	4	Rhoj
	5.87174e-47	0.40472	0.861	0.758	1.02133e-42	4	Uap1
	1.99685e-46	0.258871	0.392	0.243	3.47331e-42	4	Pmvk
	6.11617e-42	0.300946	0.36	0.219	1.06385e-37	4	Mmp3
	6.02634e-40	0.262831	0.676	0.517	1.04822e-35	4	Cav1
	8.5788e-36	0.361464	0.389	0.263	1.4922e-31	4	Msmo1
	1.02269e-34	0.260508	0.756	0.645	1.77887e-30	4	Ccl7
	1.76428e-30	0.272733	0.885	0.825	3.06878e-26	4	Nfkbia
	6.45875e-29	0.50559	0.375	0.251	1.12343e-24	4	Serpinb2
	3.16976e-25	0.405799	0.679	0.584	5.51348e-21	4	Ccl2
	7.78322e-20	0.250488	0.821	0.761	1.35381e-15	4	Vcam1
	8.53928e-20	0.292483	0.956	0.911	1.48532e-15	4	Nupr1
	1.44611e-14	0.382945	0.577	0.485	2.51537e-10	4	Spp1
	0	1.86775	0.97	0.72	0	5	Apoe
	0	1.66594	0.969	0.431	0	5	Clec3b
	0	1.58686	0.983	0.621	0	5	Pi16
	0	1.48792	0.998	0.715	0	5	Cfh
	0	1.41355	0.912	0.439	0	5	Dpep1
	0	1.40761	1	0.956	0	5	Gsn
	0	1.29541	1	0.75	0	5	Fbln1
	0	1.27475	1	0.843	0	5	Serping1
	0	1.2611	0.345	0.028	0	5	Inmt
	0	1.22506	0.999	0.672	0	5	Htra3
	0	1.09928	0.913	0.49	0	5	Plpp3
	0	1.04099	0.997	0.68	0	5	Selenop
	0	0.971435	0.88	0.393	0	5	Islr
	0	0.95553	0.98	0.564	0	5	Gstm1
	0	0.945499	1	0.999	0	5	Dcn
	0	0.899164	0.993	0.702	0	5	Cd302
	0	0.89321	0.841	0.465	0	5	Pcolce2
	0	0.886743	1	0.758	0	5	Dpt
	0	0.881023	0.975	0.66	0	5	Slc43a3
	0	0.864707	0.999	0.907	0	5	Lum
	0	0.843434	1	0.997	0	5	Cst3
	0	0.842277	0.79	0.348	0	5	Entpd2
	0	0.806708	0.774	0.351	0	5	Tnxb
	0	0.785687	0.976	0.574	0	5	Cygb
	0	0.727753	0.999	0.755	0	5	Zbtb20
	0	0.726359	0.74	0.319	0	5	Smpdl3a
	0	0.719549	1	0.998	0	5	Itm2b
	0	0.708397	0.966	0.575	0	5	Fxyd1
	0	0.700228	0.996	0.75	0	5	Rarres2
	0	0.672042	0.975	0.692	0	5	Fcgrt
	5.20341e-307	0.676777	0.972	0.655	9.05081e-303	5	Ypel3
	2.50839e-304	0.733037	0.745	0.312	4.36309e-300	5	Qpct
	5.98658e-300	0.783498	0.997	0.789	1.04131e-295	5	Igfbp4
	2.92981e-299	0.676106	0.53	0.155	5.09611e-295	5	Pid1
	2.04798e-289	1.05336	0.613	0.226	3.56226e-285	5	Tmem100
	5.92969e-285	0.682679	0.955	0.621	1.03141e-280	5	Pdlim2
	4.43074e-284	0.693689	0.857	0.445	7.70683e-280	5	Ltbp4
	5.25716e-280	0.709979	0.989	0.72	9.1443e-276	5	Pmp22
	8.64092e-276	0.829907	0.99	0.793	1.503e-271	5	Mfap4
	1.6348e-275	0.6956	0.99	0.714	2.84356e-271	5	Mmp2
	2.098e-274	0.619256	0.994	0.83	3.64927e-270	5	Rnase4
	2.15214e-268	0.870494	0.834	0.445	3.74343e-264	5	Eln
	4.26361e-265	0.646859	1	0.969	7.41612e-261	5	Ccdc80
	2.01097e-263	0.581453	1	0.992	3.49788e-259	5	Igfbp7
	4.50171e-262	1.04737	0.82	0.495	7.83027e-258	5	Id2
	1.32432e-259	0.455953	0.321	0.057	2.30353e-255	5	Lmo2
	1.34486e-255	0.608988	0.942	0.687	2.33924e-251	5	Lrp1
	3.84423e-255	0.684101	0.388	0.089	6.68665e-251	5	Scara5
	7.2201e-255	0.956329	0.948	0.628	1.25586e-250	5	C3
	1.37325e-254	0.840726	0.945	0.622	2.38864e-250	5	Igf1
	2.43091e-251	0.598566	0.999	0.943	4.22832e-247	5	Ecm1
	9.8154e-248	0.818327	0.795	0.419	1.70729e-243	5	Tcf21
	4.31933e-244	0.538825	0.341	0.068	7.51304e-240	5	Ccl19
	6.24272e-242	0.633591	0.658	0.295	1.08586e-237	5	Gstt1
	1.30186e-240	0.726496	0.957	0.676	2.26446e-236	5	Gas1
	4.27124e-233	0.862223	0.988	0.958	7.4294e-229	5	Junb
	1.7001e-231	0.72479	0.719	0.401	2.95716e-227	5	Glul
	4.00383e-230	0.689652	0.805	0.449	6.96426e-226	5	Fbln5
	2.64353e-229	0.689764	0.97	0.656	4.59815e-225	5	Ogn
	4.83323e-226	0.676691	0.785	0.501	8.40692e-222	5	Olfml2b
	1.01096e-224	0.624135	0.983	0.7	1.75847e-220	5	Cd34
	1.14969e-220	0.514793	0.376	0.096	1.99977e-216	5	Vit
	5.77142e-219	0.617092	0.386	0.102	1.00388e-214	5	Fmo2
	2.85219e-218	0.662109	0.948	0.689	4.9611e-214	5	Nid1
	9.43744e-214	0.514794	0.451	0.14	1.64155e-209	5	Atp1a2
	4.56455e-209	0.697874	0.998	0.927	7.93958e-205	5	Mfap5
	4.00153e-207	0.626905	1	0.914	6.96026e-203	5	Mgp
	6.73875e-207	0.942205	0.709	0.36	1.17214e-202	5	Gas6
	2.23891e-201	0.543711	0.885	0.587	3.89435e-197	5	Cpq
	4.18823e-201	1.02868	0.812	0.545	7.285e-197	5	Nbl1
	2.16038e-200	0.539443	0.59	0.228	3.75777e-196	5	Abca8a
	2.89661e-200	0.786536	0.494	0.188	5.03837e-196	5	Fgl2
	5.38049e-197	0.515405	0.983	0.795	9.35883e-193	5	Sptbn1
	2.81752e-196	0.596613	0.738	0.372	4.9008e-192	5	Fxyd6
	6.31422e-196	0.432548	1	0.98	1.09829e-191	5	Ctsl
	5.31489e-193	0.607057	0.73	0.414	9.24472e-189	5	Ramp2
	1.21892e-192	0.556941	0.565	0.25	2.12019e-188	5	Ar
	1.26151e-191	0.879763	0.645	0.339	2.19428e-187	5	Ackr3
	4.59072e-185	0.486453	0.508	0.196	7.98509e-181	5	Scn7a
	5.35071e-180	0.592433	0.967	0.784	9.30702e-176	5	Il11ra1
	7.71184e-180	0.51279	0.954	0.671	1.3414e-175	5	Sod3
	6.08035e-179	0.301568	0.252	0.049	1.05762e-174	5	Aspa
	1.6686e-178	0.661419	0.988	0.89	2.90237e-174	5	Fos
	1.93968e-176	0.296637	0.263	0.055	3.37388e-172	5	Cyp27a1
	3.86049e-175	0.470402	1	0.984	6.71493e-171	5	Jund
	9.57723e-172	0.380409	1	0.979	1.66586e-167	5	Cyb5a
	1.504e-171	0.509285	0.937	0.633	2.61605e-167	5	Col14a1
	1.92989e-170	0.549094	0.607	0.302	3.35686e-166	5	Camk2n1
	3.98166e-165	0.5068	0.906	0.647	6.9257e-161	5	Lamc1
	4.26176e-161	0.451257	0.4	0.138	7.41291e-157	5	Ablim1
	1.18182e-159	0.262922	1	1	2.05566e-155	5	Ftl1
	2.88274e-156	0.50695	0.966	0.853	5.01424e-152	5	Egr1
	1.01074e-154	0.664455	0.971	0.892	1.75809e-150	5	Ier2
	2.50859e-154	0.469384	1	0.95	4.36344e-150	5	Serpinf1
	1.31601e-153	0.564812	0.758	0.551	2.28907e-149	5	Gstm5
	2.59871e-152	0.43637	0.978	0.799	4.52019e-148	5	Fuca1
	1.93822e-148	0.352428	0.313	0.091	3.37134e-144	5	Ntn1
	1.8613e-147	0.407188	1	0.944	3.23755e-143	5	Timp2
	1.26997e-146	0.482386	0.799	0.591	2.20898e-142	5	Slc1a5
	1.7693e-146	0.47654	0.623	0.294	3.07752e-142	5	Sparcl1
	3.33344e-146	0.324855	1	1	5.79819e-142	5	Cd81
	2.61117e-143	0.521067	0.691	0.473	4.54187e-139	5	Sulf2
	1.57885e-142	0.325344	0.992	0.848	2.74625e-138	5	Mgst1
	3.58737e-142	0.446139	0.984	0.804	6.23987e-138	5	Ahnak
	3.83657e-141	0.436809	0.939	0.755	6.67333e-137	5	Nfib
	5.25713e-141	0.372264	0.994	0.922	9.14426e-137	5	Smim14
	3.06503e-140	0.559272	0.76	0.496	5.33132e-136	5	Osr1
	3.03229e-137	0.527063	0.687	0.377	5.27437e-133	5	Smoc2
	7.55279e-137	0.416649	0.945	0.775	1.31373e-132	5	Eif4a2
	3.72289e-136	0.415599	0.958	0.744	6.4756e-132	5	Ddah2
	8.90894e-134	0.426313	0.9	0.687	1.54962e-129	5	Celf2
	6.91015e-132	0.592324	0.408	0.168	1.20195e-127	5	Thbd
	1.72481e-131	0.400854	0.961	0.79	3.00013e-127	5	Rsrp1
	5.46332e-131	0.334601	0.283	0.083	9.50289e-127	5	Omd
	1.68827e-130	0.43132	0.985	0.759	2.93657e-126	5	Ly6a
	2.36305e-130	0.414474	0.974	0.775	4.11028e-126	5	Adamts2
	7.32171e-130	0.475599	0.762	0.565	1.27354e-125	5	Hexb
	3.23324e-129	0.395835	0.88	0.672	5.6239e-125	5	Tprgl
	3.43153e-128	0.488886	0.986	0.907	5.9688e-124	5	Cd9
	4.91424e-128	0.492579	0.563	0.288	8.54783e-124	5	Itgbl1
	6.01171e-127	0.536757	0.836	0.568	1.04568e-122	5	Klf4
	7.0386e-127	0.639224	0.962	0.813	1.22429e-122	5	Dusp1
	2.00055e-125	0.453109	0.788	0.576	3.47975e-121	5	Pdgfra
	1.17894e-123	0.396325	0.828	0.632	2.05065e-119	5	Sgce
	3.95561e-123	0.693265	0.449	0.209	6.88039e-119	5	C4b
	6.39222e-122	0.369627	0.992	0.908	1.11186e-117	5	Nupr1
	2.337e-121	0.447244	0.952	0.683	4.06498e-117	5	Pam
	7.13242e-119	0.459279	0.963	0.688	1.24061e-114	5	Ebf1
	7.11036e-118	0.459669	0.916	0.687	1.23678e-113	5	Nfia
	1.0501e-117	0.417756	0.58	0.324	1.82655e-113	5	Selenbp1
	1.20821e-117	0.38247	0.883	0.673	2.10156e-113	5	Nfix
	1.53573e-116	0.340577	0.973	0.834	2.67125e-112	5	Atraid
	1.98079e-115	0.363079	1	0.971	3.44539e-111	5	Psap
	6.04444e-114	0.508232	0.567	0.317	1.05137e-109	5	Cdkn1c
	1.8357e-113	0.393228	0.539	0.278	3.19302e-109	5	Lama2
	1.06245e-112	0.299062	0.999	0.977	1.84803e-108	5	Lamp1
	2.26232e-112	0.441973	0.486	0.245	3.93509e-108	5	Abi3bp
	2.39406e-111	0.445028	0.747	0.557	4.16423e-107	5	Klf9
	2.57803e-111	0.357374	0.975	0.765	4.48423e-107	5	Mfap2
	1.1702e-109	0.313139	0.991	0.919	2.03545e-105	5	Tmem50a
	3.07929e-108	0.334383	0.945	0.743	5.35612e-104	5	Sat1
	3.16891e-107	0.456994	0.973	0.843	5.512e-103	5	Ugp2
	2.60498e-105	0.269463	1	0.995	4.5311e-101	5	Pfdn5
	7.7651e-105	0.407143	0.452	0.226	1.35066e-100	5	Anpep
	8.34222e-105	0.276882	1	0.925	1.45105e-100	5	H2-D1
	1.25547e-104	0.420601	0.477	0.242	2.18376e-100	5	Ecm2
	1.36258e-104	0.42674	0.84	0.55	2.37007e-100	5	Tppp3
	5.88399e-104	0.399335	0.765	0.61	1.02346e-99	5	Dhrs7
	6.99574e-104	0.546779	0.641	0.441	1.21684e-99	5	C1ra
	2.74084e-103	0.347613	0.893	0.669	4.76742e-99	5	Itgb5
	1.82466e-102	0.33451	0.992	0.845	3.17381e-98	5	Myl12b
	8.4319e-102	0.337748	0.973	0.828	1.46664e-97	5	Lamp2
	9.40507e-102	0.575601	0.991	0.95	1.63592e-97	5	Gpx3
	4.34873e-101	0.259096	1	1	7.56417e-97	5	Malat1
	1.55616e-100	0.60136	0.695	0.46	2.70678e-96	5	Sfrp1
	3.95148e-99	0.379132	0.958	0.803	6.8732e-95	5	Plpp1
	4.94487e-98	0.256587	1	0.992	8.6011e-94	5	Tmem59
	3.59625e-97	0.374237	0.478	0.236	6.25531e-93	5	Ace
	1.54046e-96	0.310443	0.996	0.924	2.67948e-92	5	Lhfp
	2.81608e-96	0.454628	0.945	0.824	4.89828e-92	5	Plat
	2.93728e-94	0.420201	0.358	0.162	5.1091e-90	5	Kazald1
	4.51943e-92	0.385403	0.43	0.221	7.8611e-88	5	Ebf2
	7.60641e-92	0.518182	0.986	0.897	1.32306e-87	5	Jun
	1.08517e-91	0.414839	0.625	0.408	1.88755e-87	5	Ms4a4d
	9.09447e-90	0.751599	0.398	0.198	1.58189e-85	5	Adm
	4.45566e-89	0.35857	0.929	0.778	7.75018e-85	5	Bicc1
	2.19692e-88	0.372896	0.653	0.445	3.82132e-84	5	Lpar1
	8.86284e-88	0.368101	0.503	0.268	1.5416e-83	5	Pdlim3
	5.57512e-87	0.458133	0.908	0.714	9.69737e-83	5	Cpxm1
	1.89071e-85	0.500522	0.349	0.161	3.28871e-81	5	Svep1
	1.18584e-84	0.409498	0.548	0.363	2.06264e-80	5	Lamb2
	1.30361e-84	0.374466	0.76	0.616	2.26751e-80	5	Gstm2
	5.60072e-84	0.366907	0.539	0.323	9.74189e-80	5	C1qtnf2
	1.4647e-83	0.276257	0.995	0.953	2.5477e-79	5	Rabac1
	3.22825e-82	0.312202	0.342	0.158	5.61521e-78	5	3632451O06Rik
	1.54134e-81	0.282614	0.929	0.758	2.68101e-77	5	Serinc3
	1.9145e-81	0.503264	0.333	0.155	3.33007e-77	5	Fst
	2.54516e-81	0.273181	0.254	0.093	4.42705e-77	5	1700019D03Rik
	1.19167e-79	0.461842	0.742	0.592	2.07279e-75	5	Srpx
	1.25723e-79	0.284684	0.994	0.882	2.18683e-75	5	Col6a1
	1.76683e-79	0.420373	0.871	0.658	3.07322e-75	5	Phlda1
	7.77658e-79	0.334745	0.767	0.617	1.35266e-74	5	Aldh2
	3.30191e-77	0.460326	0.658	0.47	5.74335e-73	5	C1s1
	4.06319e-76	0.295084	0.317	0.143	7.06751e-72	5	Ctsf
	2.3784e-75	0.30392	0.973	0.895	4.13699e-71	5	Sdcbp
	5.44294e-75	0.526789	0.597	0.442	9.46744e-71	5	Nr4a1
	4.38858e-74	0.428583	0.587	0.405	7.63349e-70	5	Gxylt2
	2.12522e-72	0.266765	0.29	0.125	3.69661e-68	5	Cped1
	4.45777e-72	0.351296	0.588	0.388	7.75384e-68	5	Pdgfrl
	4.87705e-72	0.405101	0.848	0.616	8.48315e-68	5	Il33
	6.26592e-72	0.384866	0.556	0.392	1.08989e-67	5	Zeb1
	3.3759e-71	0.404765	0.535	0.377	5.87203e-67	5	Snx18
	7.63313e-71	0.256778	0.996	0.945	1.32771e-66	5	Serpinb6a
	1.61466e-70	0.343235	0.637	0.505	2.80853e-66	5	Ginm1
	4.28021e-70	0.332628	0.432	0.253	7.445e-66	5	Sqor
	7.06076e-70	0.263558	0.989	0.929	1.22815e-65	5	Cox7a2l
	9.97352e-70	0.395828	0.85	0.66	1.73479e-65	5	Cebpd
	1.05456e-68	0.502299	0.598	0.413	1.83431e-64	5	Lpl
	1.57994e-68	0.345243	0.409	0.229	2.74814e-64	5	Bace2
	2.21414e-68	0.43074	0.389	0.217	3.85128e-64	5	Txnip
	2.14217e-67	0.329113	0.419	0.238	3.72609e-63	5	Foxp2
	7.81738e-67	0.279268	0.293	0.131	1.35975e-62	5	Lbp
	1.9137e-66	0.271838	0.916	0.762	3.32869e-62	5	Map1lc3a
	1.9595e-66	0.299541	0.931	0.824	3.40835e-62	5	Sdf4
	7.05704e-66	0.383452	0.99	0.921	1.2275e-61	5	Id3
	1.85827e-65	0.319552	0.924	0.725	3.23228e-61	5	Heg1
	3.95425e-65	0.358596	0.48	0.299	6.87803e-61	5	C1qtnf7
	7.84693e-65	0.257411	0.963	0.844	1.36489e-60	5	Bnip3l
	2.08351e-63	0.263301	0.943	0.743	3.62406e-59	5	Timp3
	2.66809e-63	0.358137	0.841	0.684	4.64087e-59	5	Htra1
	1.08662e-61	0.254794	0.89	0.753	1.89007e-57	5	Pigp
	7.47478e-60	0.286576	0.92	0.775	1.30016e-55	5	Hexa
	1.36061e-59	0.290879	0.712	0.592	2.36664e-55	5	Ggh
	4.78875e-59	0.338458	0.454	0.294	8.32956e-55	5	Tcp11l2
	2.73419e-58	0.334939	0.601	0.469	4.75584e-54	5	Add3
	4.80644e-58	0.339226	0.714	0.541	8.36032e-54	5	Adamts5
	1.90493e-55	0.253519	0.878	0.652	3.31343e-51	5	Gpm6b
	3.70655e-55	0.453851	0.967	0.834	6.44717e-51	5	Klf2
	2.35831e-54	0.337394	0.433	0.289	4.10204e-50	5	Svil
	3.9015e-54	0.419035	0.565	0.432	6.78627e-50	5	Cp
	1.53695e-53	0.264907	0.916	0.772	2.67338e-49	5	Axl
	8.43724e-53	0.316062	0.563	0.434	1.46757e-48	5	Rbms3
	1.52712e-52	0.346144	0.537	0.373	2.65627e-48	5	Crispld2
	2.57038e-52	0.353106	0.602	0.448	4.47092e-48	5	Cd55
	5.09043e-52	0.265565	0.897	0.723	8.8543e-48	5	Pmepa1
	1.08836e-51	0.315358	0.646	0.531	1.89309e-47	5	Medag
	1.16672e-50	0.700866	0.358	0.206	2.0294e-46	5	Cilp
	1.4047e-50	0.402136	0.507	0.367	2.44334e-46	5	Akap12
	2.14583e-50	0.312767	0.402	0.25	3.73246e-46	5	Steap3
	9.93282e-50	0.331326	0.98	0.899	1.72771e-45	5	Fbn1
	1.63262e-49	0.337897	0.359	0.208	2.83978e-45	5	Sema3c
	2.3251e-49	0.311798	0.535	0.396	4.04429e-45	5	Ndrg2
	4.10533e-49	0.297197	0.578	0.447	7.14081e-45	5	Slc29a1
	4.82383e-49	0.316556	0.397	0.238	8.39057e-45	5	Serpina3n
	2.98834e-47	0.282526	0.655	0.52	5.19791e-43	5	Fhl1
	1.43108e-45	0.339388	0.438	0.318	2.48922e-41	5	Slc16a2
	1.26523e-42	0.291797	0.426	0.287	2.20075e-38	5	Tsc22d3
	1.87276e-42	0.340566	0.498	0.398	3.25748e-38	5	Ddr2
	3.32692e-42	0.430021	0.577	0.473	5.78685e-38	5	Fosb
	4.51084e-42	0.269093	0.372	0.238	7.84615e-38	5	Ltbp1
	5.09879e-41	0.314254	0.7	0.592	8.86884e-37	5	Matn2
	7.35923e-41	0.268678	0.636	0.536	1.28006e-36	5	Fgfr1
	2.38883e-38	0.476934	0.459	0.333	4.15513e-34	5	Ly6c1
	1.26893e-37	0.252423	0.412	0.288	2.20719e-33	5	Pink1
	2.0592e-36	0.270959	0.6	0.529	3.58178e-32	5	Herpud1
	6.17122e-36	0.258659	0.597	0.515	1.07342e-31	5	Sntb2
	7.59036e-36	0.307936	0.553	0.433	1.32027e-31	5	Plxdc2
	8.25391e-36	0.295224	0.382	0.257	1.43568e-31	5	Tshz2
	3.14781e-33	0.279327	0.482	0.4	5.4753e-29	5	Bmyc
	1.49745e-32	0.259426	0.416	0.315	2.60467e-28	5	Tnfsf12
	2.69714e-32	0.314224	0.861	0.739	4.69141e-28	5	Btg2
	2.58239e-28	0.260101	0.322	0.214	4.49181e-24	5	Pamr1
	3.13097e-28	0.253269	0.553	0.509	5.446e-24	5	Pttg1
	1.7729e-26	0.268903	0.472	0.407	3.08378e-22	5	Thbs3
	7.90296e-25	0.406033	0.423	0.351	1.37464e-20	5	Bambi
	8.89461e-25	0.29684	0.926	0.802	1.54713e-20	5	Cyr61
	2.18411e-23	0.253643	0.407	0.33	3.79905e-19	5	Man1a
	1.21868e-20	0.419257	0.548	0.457	2.11977e-16	5	Wisp2
	1.44643e-16	0.333009	0.945	0.852	2.51592e-12	5	Igfbp6
	1.48609e-16	0.271711	0.375	0.297	2.58491e-12	5	Efemp1
	1.6268e-14	0.267844	0.496	0.461	2.82966e-10	5	Zfp36
	8.64176e-12	0.253499	0.421	0.39	1.50315e-07	5	Ppp1r15a
	1.0948e-11	0.3612	0.428	0.394	1.9043e-07	5	Vegfd
	7.26819e-11	0.254741	0.265	0.208	1.26423e-06	5	Gpc3
	0.00282552	0.55667	0.406	0.406	1	5	Hbb-bs
	0	1.6768	1	0.804	0	6	Mfap4
	0	1.47217	0.923	0.257	0	6	Pdlim3
	0	1.03491	1	1	0	6	Col3a1
	1.31136e-294	0.409059	0.376	0.042	2.28098e-290	6	Art4
	9.6776e-283	1.14148	0.997	0.765	1.68332e-278	6	Fbln1
	2.55867e-278	1.41684	0.99	0.699	4.45055e-274	6	Selenop
	6.70207e-274	1.02387	0.826	0.297	1.16576e-269	6	Gucy1a1
	4.24752e-272	1.00606	0.9	0.397	7.38813e-268	6	Gxylt2
	8.47484e-272	1.31901	0.945	0.459	1.47411e-267	6	Sfrp1
	1.56132e-264	1.0899	0.915	0.383	2.71577e-260	6	Fxyd6
	8.08682e-263	0.694068	1	1	1.40662e-258	6	Sparc
	1.46499e-259	0.895489	0.841	0.287	2.5482e-255	6	Itgbl1
	3.69699e-246	1.01145	1	0.997	6.43055e-242	6	Cst3
	3.48511e-244	0.98398	0.992	0.776	6.062e-240	6	Mfap2
	3.67606e-239	0.982516	0.868	0.383	6.39413e-235	6	Pdgfrl
	4.88232e-233	2.01189	0.883	0.465	8.49231e-229	6	Eln
	4.1703e-231	0.85089	0.985	0.786	7.25382e-227	6	Adamts2
	1.61273e-229	0.866393	0.999	0.913	2.80518e-225	6	Lum
	3.04617e-221	0.670251	0.679	0.195	5.29851e-217	6	Fgl2
	1.06626e-215	0.757013	0.837	0.338	1.85465e-211	6	Smpdl3a
	1.9219e-213	0.416838	0.359	0.055	3.34295e-209	6	Fbln7
	1.10095e-212	0.769741	1	1	1.91499e-208	6	Col1a1
	1.27377e-211	0.77389	0.977	0.673	2.21559e-207	6	Ypel3
	1.50027e-208	0.788442	1	0.992	2.60957e-204	6	Igfbp7
	6.02885e-208	1.15407	0.996	0.86	1.04866e-203	6	Postn
	3.27559e-206	0.809205	0.999	0.772	5.69755e-202	6	Dpt
	1.38184e-202	0.680794	0.665	0.21	2.40358e-198	6	Gucy1b1
	5.33562e-194	1.00691	0.964	0.639	9.28078e-190	6	Igf1
	4.13352e-193	0.74225	0.964	0.649	7.18984e-189	6	Col14a1
	6.42237e-184	0.616467	1	1	1.11711e-179	6	Col1a2
	7.43284e-181	0.5734	1	0.981	1.29287e-176	6	Ctsl
	8.03671e-177	0.702788	0.948	0.744	1.3979e-172	6	C1qtnf6
	2.26339e-174	0.689624	0.924	0.466	3.93693e-170	6	Dpep1
	2.71198e-174	0.471287	0.438	0.098	4.71721e-170	6	Kcne4
	9.11052e-174	0.861189	0.999	0.919	1.58468e-169	6	Mgp
	3.84664e-173	0.685952	0.996	0.852	6.69085e-169	6	Serping1
	5.16844e-173	0.673567	0.915	0.567	8.98999e-169	6	Hexb
	1.08822e-172	0.755453	0.827	0.373	1.89286e-168	6	Gas6
	2.74043e-172	0.698051	0.974	0.659	4.76671e-168	6	Gpm6b
	2.21956e-171	0.760051	0.975	0.735	3.86071e-167	6	Apoe
	2.18337e-167	0.64431	0.999	0.924	3.79776e-163	6	Mmp23
	9.49387e-166	0.738826	0.794	0.376	1.65136e-161	6	Tgfb3
	2.05257e-163	0.615001	0.99	0.855	3.57024e-159	6	Grn
	2.41412e-163	0.698956	0.966	0.598	4.19912e-159	6	Cygb
	2.39856e-162	0.699634	0.967	0.811	4.17206e-158	6	Plpp1
	5.07246e-162	0.667285	1	0.997	8.82304e-158	6	Bgn
	6.84056e-162	0.582066	0.992	0.732	1.18985e-157	6	Cfh
	1.08453e-160	0.733712	0.863	0.468	1.88644e-156	6	Thbs2
	2.54693e-159	0.646912	0.999	0.926	4.43013e-155	6	Csrp2
	4.01912e-158	0.714681	0.819	0.413	6.99086e-154	6	Dhrs3
	6.31625e-158	0.672079	0.953	0.729	1.09865e-153	6	Pmepa1
	3.86403e-157	0.535402	1	0.959	6.7211e-153	6	Col5a2
	1.10315e-156	0.575405	1	0.972	1.91882e-152	6	Loxl1
	5.55381e-156	0.504253	1	0.978	9.66031e-152	6	Ppic
	5.34398e-150	0.557003	1	0.985	9.29532e-146	6	Rbp1
	2.15542e-146	0.337226	1	1	3.74914e-142	6	Rps27
	4.29963e-146	0.341097	1	1	7.47877e-142	6	Rpl18a
	3.51554e-144	0.772841	0.957	0.675	6.11494e-140	6	Ogn
	5.18068e-144	0.704528	0.975	0.851	9.01127e-140	6	Ctsd
	2.28805e-142	0.665348	0.891	0.586	3.97983e-138	6	Matn2
	2.30493e-139	0.665226	0.997	0.925	4.0092e-135	6	Id3
	3.0224e-139	0.6069	0.951	0.722	5.25717e-135	6	Cpxm1
	2.55065e-137	0.458674	0.359	0.082	4.43661e-133	6	Kcnj15
	2.21553e-136	0.535989	0.592	0.216	3.8537e-132	6	Mn1
	1.97098e-135	0.53797	0.738	0.336	3.42832e-131	6	Gpc6
	6.26275e-132	0.363286	0.39	0.095	1.08934e-127	6	Spon1
	3.03749e-131	0.541312	0.955	0.71	5.2834e-127	6	Fcgrt
	1.6815e-129	0.746426	0.845	0.513	2.92479e-125	6	Id2
	4.81265e-128	0.580098	0.979	0.73	8.37112e-124	6	Mmp2
	1.08381e-127	0.718389	0.595	0.236	1.88517e-123	6	Serpina3n
	1.1408e-127	0.5847	0.82	0.478	1.98431e-123	6	Sulf2
	1.15717e-127	0.506496	0.974	0.794	2.01279e-123	6	Il11ra1
	1.78817e-125	0.576043	0.718	0.325	3.11034e-121	6	C1qtnf2
	2.24131e-124	0.545731	0.941	0.782	3.89854e-120	6	Hexa
	2.50587e-124	0.732635	0.909	0.681	4.3587e-120	6	Itgb5
	1.43178e-123	0.771201	0.566	0.202	2.49044e-119	6	Cilp
	1.86818e-119	0.509647	0.968	0.837	3.24952e-115	6	Lamp2
	3.82416e-119	1.25841	0.766	0.449	6.65174e-115	6	Wisp2
	1.11242e-118	0.428975	0.995	0.974	1.93495e-114	6	Map1lc3b
	2.96997e-117	0.326427	0.319	0.074	5.16596e-113	6	Ephx2
	2.73079e-116	0.60535	0.966	0.693	4.74994e-112	6	Htra3
	5.48345e-114	0.437044	1	0.999	9.53792e-110	6	Dcn
	5.65994e-113	0.456487	0.971	0.721	9.8449e-109	6	Cd302
	3.07368e-111	0.443502	0.582	0.232	5.34635e-107	6	Anpep
	5.13049e-111	0.65934	0.845	0.468	8.92398e-107	6	Fbln5
	3.9809e-109	0.399495	1	0.998	6.92437e-105	6	Itm2b
	2.96061e-108	0.321228	0.455	0.145	5.14969e-104	6	Ctsf
	1.27588e-107	0.744311	0.996	0.919	2.21926e-103	6	Cthrc1
	1.38936e-107	0.426757	1	0.952	2.41665e-103	6	Serpinf1
	4.79467e-107	0.514401	0.791	0.479	8.33984e-103	6	Pld3
	1.26062e-104	0.563064	0.938	0.694	2.19272e-100	6	Gas1
	1.0455e-102	0.257296	0.291	0.068	1.81854e-98	6	Epha7
	1.08022e-100	0.316204	1	0.999	1.87894e-96	6	Gabarap
	5.97611e-100	0.552446	0.595	0.27	1.03949e-95	6	Nedd9
	6.27881e-100	0.561879	0.953	0.786	1.09214e-95	6	Tmem45a
	1.14479e-98	0.828138	0.687	0.381	1.99125e-94	6	Vegfd
	2.75982e-97	0.483085	0.946	0.784	4.80044e-93	6	Eif4a2
	1.01696e-96	1.4039	0.896	0.742	1.7689e-92	6	Sfrp2
	4.46219e-96	0.451574	0.985	0.854	7.76154e-92	6	Myl12b
	1.98223e-95	0.581068	0.898	0.698	3.44789e-91	6	Mdk
	3.22692e-95	0.371038	0.577	0.239	5.61291e-91	6	Foxp2
	3.43979e-95	0.267741	1	1	5.98317e-91	6	Tpt1
	9.07269e-94	0.411256	0.982	0.933	1.5781e-89	6	Cox7a2l
	2.63339e-93	0.584927	0.949	0.675	4.58052e-89	6	Aspn
	1.32572e-92	0.304414	1	0.997	2.30595e-88	6	Uqcrh
	1.3744e-90	0.469978	0.633	0.311	2.39063e-86	6	Tcn2
	2.74514e-90	0.442822	0.898	0.685	4.7749e-86	6	Nfix
	1.56321e-89	0.412035	0.668	0.315	2.71904e-85	6	Gstt1
	9.6016e-88	0.413559	0.942	0.811	1.6701e-83	6	Fuca1
	5.51664e-87	0.426265	0.849	0.518	9.59564e-83	6	Plpp3
	8.64183e-87	0.543926	0.984	0.896	1.50316e-82	6	Fos
	1.28711e-85	0.459957	0.74	0.377	2.2388e-81	6	Entpd2
	1.57481e-85	0.820921	0.875	0.681	2.73922e-81	6	Ptn
	2.04719e-85	0.46725	0.525	0.224	3.56089e-81	6	Clec11a
	3.29675e-85	0.321058	0.824	0.425	5.73436e-81	6	Islr
	6.33227e-85	0.394129	0.929	0.6	1.10143e-80	6	Fxyd1
	4.2472e-83	0.459525	0.974	0.87	7.38758e-79	6	Lox
	5.4508e-83	0.336384	1	0.979	9.48112e-79	6	Lamp1
	5.6076e-83	0.417966	0.992	0.883	9.75386e-79	6	Mxra8
	2.34984e-82	0.374778	0.975	0.771	4.08731e-78	6	Zbtb20
	6.0548e-81	0.38762	0.956	0.843	1.05317e-76	6	Atraid
	1.59373e-79	0.406171	0.629	0.3	2.77213e-75	6	C1qtnf7
	1.66796e-79	0.450487	0.968	0.81	2.90126e-75	6	Zfp36l1
	3.56399e-79	0.371113	0.981	0.941	6.1992e-75	6	1810058I24Rik
	4.99116e-79	0.418008	0.956	0.854	8.68162e-75	6	Eva1b
	2.6172e-78	0.527663	0.912	0.701	4.55235e-74	6	Nfia
	2.65073e-78	0.426521	0.907	0.707	4.61068e-74	6	Nid1
	1.12776e-77	0.432928	0.749	0.429	1.96162e-73	6	Plxdc2
	1.96691e-77	0.367414	0.999	0.971	3.42124e-73	6	Ccdc80
	2.65113e-76	0.398009	0.985	0.929	4.61138e-72	6	Lhfp
	1.04603e-75	0.429988	0.788	0.496	1.81947e-71	6	Ahnak2
	2.64288e-75	0.252361	0.301	0.087	4.59703e-71	6	Ccl19
	3.94593e-75	0.488287	1	0.952	6.86356e-71	6	Gpx3
	5.73044e-75	0.442396	0.802	0.584	9.96752e-71	6	Ctsa
	2.48734e-74	0.292882	0.422	0.164	4.32649e-70	6	Dpp7
	6.06508e-74	0.356449	0.984	0.923	1.05496e-69	6	Snhg18
	8.05081e-74	0.422829	0.909	0.643	1.40036e-69	6	Pdlim2
	2.27704e-73	0.537938	0.993	0.952	3.96069e-69	6	Meg3
	2.67183e-73	0.46472	0.791	0.546	4.64737e-69	6	Ctsk
	4.07155e-73	0.407302	0.724	0.432	7.08206e-69	6	Tcea3
	4.39971e-71	0.395235	0.646	0.361	7.65285e-67	6	Gaa
	5.55246e-71	0.347871	0.772	0.445	9.65794e-67	6	C1ra
	5.92328e-70	0.375827	0.886	0.7	1.0303e-65	6	Celf2
	1.61291e-69	0.273754	0.739	0.392	2.8055e-65	6	Smoc2
	1.87375e-69	0.366871	0.497	0.22	3.2592e-65	6	C4b
	7.81786e-69	0.392025	0.761	0.51	1.35984e-64	6	Scpep1
	8.48996e-69	0.403843	0.806	0.577	1.47674e-64	6	Chpf
	1.08297e-68	0.472547	0.755	0.443	1.88373e-64	6	Tcf21
	1.14055e-67	0.316935	0.996	0.991	1.98388e-63	6	Eif3f
	2.76835e-67	0.292876	0.5	0.215	4.81527e-63	6	Scn7a
	2.62294e-66	0.398244	0.912	0.769	4.56235e-62	6	Serinc3
	4.57274e-66	0.314904	0.511	0.234	7.95382e-62	6	Bace2
	6.24059e-66	0.323321	0.533	0.251	1.08549e-61	6	Steap3
	7.09565e-66	0.254769	1	0.995	1.23422e-61	6	Pfdn5
	3.218e-65	0.284125	1	0.993	5.59739e-61	6	Tmem59
	3.22251e-65	0.326186	0.989	0.95	5.60523e-61	6	Ctsz
	5.20353e-65	0.402708	0.713	0.455	9.05101e-61	6	Ssbp2
	8.13154e-65	0.391274	0.89	0.752	1.4144e-60	6	Mfge8
	1.85253e-64	0.604563	0.826	0.607	3.2223e-60	6	Itm2a
	2.71974e-63	0.610824	0.974	0.926	4.73071e-59	6	Mt1
	5.68658e-63	0.286536	1	0.973	9.89124e-59	6	Psap
	6.10391e-63	0.273945	0.349	0.126	1.06171e-58	6	Hmgcs2
	7.14614e-63	0.386657	0.865	0.651	1.243e-58	6	C3
	7.70167e-63	0.371971	0.912	0.788	1.33963e-58	6	Bicc1
	3.21243e-62	0.558729	0.948	0.823	5.58771e-58	6	Dusp1
	5.43808e-62	0.35618	0.534	0.256	9.459e-58	6	Abi3bp
	8.54873e-62	0.592917	0.415	0.179	1.48697e-57	6	Adamtsl2
	1.29587e-61	0.282846	0.993	0.986	2.25403e-57	6	Rtraf
	1.37569e-61	0.288535	0.986	0.966	2.39287e-57	6	Cnpy2
	2.12398e-61	0.424001	0.475	0.222	3.69446e-57	6	Frzb
	3.19269e-61	0.402318	0.934	0.849	5.55337e-57	6	Mtch1
	3.20722e-61	0.255911	0.321	0.115	5.57864e-57	6	Gng8
	3.27001e-61	0.432794	0.499	0.241	5.68785e-57	6	1500015O10Rik
	1.36162e-60	0.333535	0.897	0.785	2.36839e-56	6	Serf1
	2.60654e-60	0.516787	0.951	0.808	4.53382e-56	6	Cyr61
	2.78678e-60	0.345333	0.65	0.368	4.84733e-56	6	Lamb2
	8.35962e-60	0.377498	0.729	0.476	1.45407e-55	6	Clmp
	1.89762e-59	0.343649	0.782	0.518	3.30071e-55	6	Olfml2b
	6.9135e-59	0.394306	0.663	0.375	1.20253e-54	6	Crispld2
	1.84748e-58	0.385068	0.971	0.803	3.2135e-54	6	Igfbp4
	3.29588e-58	0.304829	1	0.994	5.73285e-54	6	Fstl1
	1.69559e-57	0.29643	0.473	0.225	2.94931e-53	6	Smad7
	4.92649e-57	0.341303	0.968	0.85	8.56913e-53	6	Olfml3
	5.21652e-57	0.32476	0.916	0.759	9.07362e-53	6	Ddah2
	1.29317e-56	0.442855	0.898	0.702	2.24934e-52	6	Pam
	6.22055e-56	0.339261	0.997	0.996	1.082e-51	6	Eef2
	1.68538e-55	0.317512	0.593	0.328	2.93155e-51	6	Ltbp3
	3.06606e-55	0.319812	0.578	0.322	5.33311e-51	6	Man2b1
	7.89914e-55	0.386483	0.438	0.207	1.37398e-50	6	Gem
	1.02908e-53	0.351647	0.949	0.861	1.78998e-49	6	Egr1
	1.38907e-53	0.336242	0.808	0.593	2.41614e-49	6	Ggh
	2.3611e-53	0.281602	0.974	0.928	4.10689e-49	6	Ergic3
	8.38857e-53	0.340718	0.511	0.272	1.45911e-48	6	Uap1l1
	1.21701e-52	0.283622	0.771	0.474	2.11686e-48	6	C1s1
	2.06772e-52	0.383595	0.618	0.382	3.5966e-48	6	Cpne8
	3.66174e-52	0.352233	0.88	0.684	6.36923e-48	6	Slc43a3
	4.49423e-52	0.335165	0.577	0.336	7.81726e-48	6	Cercam
	8.60914e-52	0.354604	0.978	0.961	1.49747e-47	6	Junb
	2.0947e-51	0.322693	0.525	0.278	3.64351e-47	6	Acvrl1
	2.29672e-51	0.356887	0.801	0.595	3.99491e-47	6	Mxra7
	3.68318e-51	0.262286	1	0.993	6.40652e-47	6	Ctsb
	1.20068e-49	0.283323	0.989	0.957	2.08847e-45	6	Nedd4
	3.73422e-49	0.317473	1	0.996	6.49529e-45	6	B2m
	4.15295e-49	0.554712	0.824	0.749	7.22364e-45	6	Btg2
	5.40848e-49	0.264475	0.477	0.24	9.40751e-45	6	Adamts10
	9.64049e-49	0.261771	0.975	0.882	1.67687e-44	6	Col5a1
	2.22726e-48	0.328853	0.834	0.667	3.8741e-44	6	Socs2
	2.32039e-48	0.314462	0.269	0.1	4.03609e-44	6	Clca3a1
	2.3852e-48	0.442102	0.489	0.266	4.14882e-44	6	Nr4a2
	3.65689e-48	0.35604	0.817	0.684	6.3608e-44	6	Oxct1
	4.62547e-48	0.319449	0.831	0.696	8.04554e-44	6	Erlec1
	7.11947e-48	0.261092	0.449	0.221	1.23836e-43	6	Rin2
	1.07718e-47	0.28132	0.956	0.874	1.87365e-43	6	Bri3
	1.64378e-47	0.303841	0.657	0.397	2.8592e-43	6	Ndrg2
	2.16524e-47	0.326753	0.556	0.32	3.76622e-43	6	Tmem64
	2.24751e-47	0.407085	0.902	0.782	3.90932e-43	6	H1f0
	5.01031e-47	0.255846	0.549	0.307	8.71493e-43	6	Dkk3
	5.5081e-47	0.26652	0.545	0.298	9.5808e-43	6	Tcp11l2
	6.02973e-47	0.255865	0.562	0.292	1.04881e-42	6	Lama2
	6.45135e-47	0.330997	0.944	0.926	1.12215e-42	6	Efemp2
	7.43871e-47	0.291685	0.334	0.141	1.29389e-42	6	Rasl11b
	3.13489e-46	0.273709	0.526	0.29	5.45282e-42	6	Tmem150a
	5.60889e-46	0.362221	0.576	0.338	9.7561e-42	6	Ngf
	1.22696e-45	0.405368	0.834	0.717	2.13417e-41	6	Lbh
	2.01039e-45	0.296779	0.609	0.361	3.49688e-41	6	Ghr
	3.98083e-45	0.280622	0.772	0.587	6.92425e-41	6	Cpe
	5.06939e-45	0.310514	0.61	0.385	8.8177e-41	6	Col16a1
	2.19705e-44	0.272974	0.559	0.318	3.82155e-40	6	Slc16a2
	7.39256e-44	0.287341	0.486	0.272	1.28586e-39	6	Nfat5
	1.01625e-42	0.359738	0.889	0.691	1.76766e-38	6	Sod3
	2.4949e-42	0.252724	0.842	0.607	4.33963e-38	6	Cpq
	4.17696e-42	0.300772	0.692	0.48	7.2654e-38	6	Atp6ap2
	7.11979e-42	0.301429	0.87	0.775	1.23842e-37	6	Nop53
	1.40181e-41	0.253565	0.902	0.768	2.4383e-37	6	Nfib
	4.56216e-41	0.391259	0.673	0.445	7.93542e-37	6	Srpx2
	4.7109e-41	0.268258	0.479	0.263	8.19414e-37	6	Pdgfrb
	1.26423e-40	0.281385	0.835	0.745	2.199e-36	6	Use1
	1.91718e-40	0.267294	0.871	0.773	3.33475e-36	6	Glmp
	4.86548e-40	0.291227	0.658	0.436	8.46302e-36	6	Rbms3
	1.15093e-39	0.284932	0.484	0.274	2.00192e-35	6	4931406P16Rik
	2.24472e-39	0.290414	0.724	0.512	3.90447e-35	6	Sntb2
	3.84786e-39	0.358086	0.474	0.277	6.69296e-35	6	Gadd45b
	4.79076e-39	0.284934	0.729	0.512	8.33305e-35	6	Ndufa4l2
	7.40457e-39	0.254036	0.93	0.887	1.28795e-34	6	Atp6v0b
	9.75862e-39	0.26244	0.626	0.392	1.69741e-34	6	Cxcl16
	1.58805e-38	0.275309	0.826	0.687	2.76226e-34	6	Tprgl
	2.1576e-38	0.251385	0.374	0.183	3.75292e-34	6	Slc1a3
	2.47031e-38	0.25411	0.701	0.451	4.29686e-34	6	Cd55
	2.56006e-38	0.412348	0.644	0.43	4.45298e-34	6	Ctgf
	3.1655e-38	0.288407	0.839	0.736	5.50608e-34	6	Eif1b
	5.56545e-38	0.27076	0.797	0.622	9.68054e-34	6	Gstm2
	2.80627e-37	0.28534	0.97	0.946	4.88123e-33	6	Aebp1
	3.55172e-37	0.29478	0.598	0.382	6.17786e-33	6	Snx18
	3.70245e-37	0.273009	0.547	0.332	6.44004e-33	6	Antxr1
	7.36961e-37	0.313878	0.633	0.423	1.28187e-32	6	Pde1a
	1.02806e-36	0.252711	0.758	0.563	1.7882e-32	6	Gstm5
	3.79875e-36	0.300271	0.624	0.424	6.60755e-32	6	Skil
	5.0799e-36	0.250259	0.6	0.38	8.83597e-32	6	Grina
	1.02542e-35	0.404386	0.838	0.731	1.78361e-31	6	Emp1
	1.71132e-35	0.31222	0.65	0.448	2.97667e-31	6	Nr4a1
	2.13485e-35	0.264086	0.466	0.262	3.71336e-31	6	Slfn5
	3.09024e-35	0.277847	0.253	0.108	5.37516e-31	6	Emb
	4.62016e-35	0.266856	0.938	0.853	8.0363e-31	6	Ugp2
	1.9224e-34	0.25293	0.941	0.893	3.34382e-30	6	Rps27rt
	8.05647e-34	0.325957	0.893	0.787	1.40134e-29	6	Lsp1
	8.11446e-34	0.307813	0.86	0.773	1.41143e-29	6	Lgals3bp
	8.94808e-34	0.259333	0.566	0.359	1.55643e-29	6	Nrip1
	1.34056e-33	0.286813	0.786	0.671	2.33177e-29	6	Golga7
	1.0364e-32	0.287751	0.555	0.356	1.80272e-28	6	Arap1
	8.34493e-32	0.328836	0.39	0.21	1.45152e-27	6	Adm
	1.00876e-31	0.263539	0.584	0.386	1.75463e-27	6	Fas
	2.84551e-31	0.25125	0.505	0.312	4.94948e-27	6	Naalad2
	3.13491e-31	0.26688	0.538	0.35	5.45287e-27	6	Kank2
	3.70589e-31	0.256659	0.569	0.386	6.44603e-27	6	Lipa
	6.74592e-31	0.289307	0.739	0.557	1.17339e-26	6	Fndc1
	4.89951e-30	0.280459	0.721	0.566	8.52221e-26	6	Nbl1
	6.42511e-30	0.320001	0.397	0.231	1.11758e-25	6	Ltbp2
	3.15032e-29	0.301555	0.386	0.215	5.47967e-25	6	Tst
	8.3709e-29	0.264859	0.684	0.522	1.45604e-24	6	P3h3
	1.2859e-28	0.272238	0.475	0.297	2.2367e-24	6	Cpz
	2.21275e-28	0.588414	0.486	0.343	3.84885e-24	6	Ddah1
	4.0556e-27	0.264534	0.615	0.444	7.05432e-23	6	Il6st
	9.84794e-27	0.262646	0.5	0.327	1.71295e-22	6	P4ha3
	1.90274e-26	0.263277	0.573	0.406	3.30963e-22	6	Picalm
	1.33527e-24	0.251428	0.584	0.421	2.32257e-20	6	Klf7
	1.67316e-24	0.259922	0.714	0.597	2.9103e-20	6	Yipf3
	1.96026e-23	0.267911	0.577	0.423	3.40967e-19	6	Raph1
	3.79312e-23	0.393643	0.522	0.363	6.59775e-19	6	Spry2
	5.78173e-23	0.288921	0.646	0.475	1.00567e-18	6	Fosb
	1.20987e-21	0.261792	0.635	0.495	2.10445e-17	6	Vamp5
	2.25593e-21	0.298703	0.609	0.456	3.92396e-17	6	Zfp36
	6.48258e-21	0.577578	0.446	0.325	1.12758e-16	6	Plk2
	7.87489e-21	0.252065	0.946	0.89	1.36976e-16	6	Cebpb
	8.29559e-21	0.266378	0.544	0.388	1.44294e-16	6	Pim1
	2.6268e-20	0.280713	0.784	0.698	4.56905e-16	6	B4galt1
	1.62479e-19	0.36762	0.753	0.641	2.82617e-15	6	Slc39a1
	5.33566e-19	0.271167	0.74	0.636	9.28086e-15	6	Il33
	4.04403e-18	0.292273	0.51	0.366	7.03419e-14	6	Fibin
	7.05243e-17	0.388299	0.701	0.635	1.2267e-12	6	Hes1
	1.39905e-16	0.27185	0.857	0.855	2.4335e-12	6	Comt
	5.70638e-16	0.29878	0.75	0.677	9.92567e-12	6	Cebpd
	8.39051e-15	0.256972	0.791	0.768	1.45945e-10	6	Mt2
	2.71293e-13	0.296297	0.288	0.185	4.71887e-09	6	H19
	4.2639e-12	0.257674	0.724	0.685	7.41662e-08	6	2011-09-01
	2.04948e-10	0.300971	0.609	0.521	3.56487e-06	6	Osr1
	3.35829e-10	0.283915	0.342	0.252	5.84141e-06	6	Ada
	1.1064e-08	0.373624	0.626	0.585	0.000192448	6	Cxcl1
	2.49773e-07	0.632481	0.305	0.234	0.00434455	6	Mmp3
	0.00124187	0.341318	0.442	0.404	1	6	Hbb-bs
	0	2.95448	1	0.207	0	7	Msln
	0	2.56561	0.961	0.08	0	7	Krt7
	0	2.53458	0.984	0.099	0	7	Krt18
	0	2.42435	0.984	0.273	0	7	Krt19
	0	2.25778	0.977	0.179	0	7	Krt8
	0	2.24979	0.993	0.207	0	7	Upk1b
	0	2.2431	0.986	0.195	0	7	Upk3b
	0	2.04974	0.788	0.06	0	7	Myl7
	0	2.02781	0.781	0.063	0	7	Krt14
	0	1.93566	1	0.282	0	7	Nkain4
	0	1.88702	0.993	0.304	0	7	Ezr
	0	1.84731	0.943	0.186	0	7	Cystm1
	0	1.78084	0.993	0.183	0	7	Gpm6a
	0	1.68134	0.874	0.093	0	7	Hpgd
	0	1.45012	0.938	0.137	0	7	Smpd3
	0	1.39854	0.888	0.115	0	7	Cldn15
	0	1.35758	0.76	0.024	0	7	Tm4sf5
	0	1.35181	0.836	0.075	0	7	Slc39a8
	0	1.3261	0.947	0.132	0	7	Spint2
	0	1.27745	0.838	0.135	0	7	Rspo1
	0	1.27129	0.639	0.05	0	7	Chil1
	0	1.24195	0.906	0.137	0	7	Lrrn4
	0	1.22772	0.893	0.106	0	7	Lsr
	0	1.21816	0.776	0.13	0	7	Bcam
	0	1.20377	0.731	0.065	0	7	Prr15
	0	1.18415	0.893	0.138	0	7	Esam
	0	1.16231	0.756	0.106	0	7	Cldn3
	0	1.13023	0.884	0.103	0	7	Pkhd1l1
	0	1.12232	0.811	0.042	0	7	Tspan8
	0	1.09852	0.781	0.12	0	7	Anxa8
	0	1.08322	0.895	0.201	0	7	F11r
	0	1.03319	0.817	0.16	0	7	Ucp2
	0	1.02482	0.763	0.054	0	7	Il18r1
	0	1.01248	0.329	0.016	0	7	Slurp1
	0	0.993786	0.301	0.008	0	7	Cst9
	0	0.967037	0.822	0.124	0	7	Tmem151a
	0	0.929781	0.406	0.012	0	7	Ckmt1
	0	0.916829	0.671	0.028	0	7	Prr15l
	0	0.900812	0.669	0.067	0	7	Gsta4
	0	0.850084	0.607	0.014	0	7	Myo5b
	0	0.838586	0.532	0.007	0	7	Chst4
	0	0.83286	0.68	0.093	0	7	Rnf128
	0	0.815835	0.413	0.013	0	7	Clic3
	0	0.800427	0.582	0.032	0	7	Tspan15
	0	0.769802	0.721	0.087	0	7	Dpp4
	0	0.766507	0.594	0.014	0	7	Muc16
	0	0.751428	0.648	0.054	0	7	6820408C15Rik
	0	0.742107	0.532	0.024	0	7	Lgals2
	0	0.723476	0.527	0.01	0	7	Unc45b
	0	0.713809	0.562	0.031	0	7	Perp
	0	0.680475	0.507	0.048	0	7	Shisa8
	0	0.6778	0.555	0.04	0	7	Prss12
	0	0.661119	0.386	0.014	0	7	Cpn1
	0	0.65067	0.573	0.066	0	7	Espn
	0	0.623222	0.582	0.059	0	7	Palmd
	0	0.612626	0.568	0.067	0	7	Cyp2s1
	0	0.610309	0.495	0.049	0	7	Mapk13
	0	0.603372	0.548	0.017	0	7	Lmo7
	0	0.597415	0.363	0.011	0	7	Plet1
	0	0.577045	0.591	0.063	0	7	Bnc1
	0	0.538574	0.5	0.031	0	7	Il17re
	0	0.526569	0.356	0.008	0	7	Bst1
	0	0.518803	0.258	0.004	0	7	AU021092
	0	0.486564	0.422	0.035	0	7	Ano1
	0	0.473282	0.445	0.026	0	7	Mpzl2
	0	0.451972	0.256	0.001	0	7	Slc26a3
	0	0.408997	0.388	0.017	0	7	Ppm1n
	0	0.384931	0.308	0.002	0	7	Slc23a3
	0	0.384732	0.299	0.011	0	7	Nkx2-9
	0	0.372209	0.295	0.002	0	7	Smim22
	0	0.357174	0.301	0.009	0	7	Agmat
	0	0.336154	0.345	0.018	0	7	Lama5
	0	0.313477	0.306	0.015	0	7	Vtcn1
	0	0.287512	0.263	0.008	0	7	Krtcap3
	9.67658e-299	1.69473	0.995	0.383	1.68314e-294	7	Slc9a3r1
	1.9079e-298	1.07248	0.813	0.166	3.31861e-294	7	C2
	7.51011e-297	0.500389	0.397	0.032	1.30631e-292	7	Ppfibp2
	4.54938e-295	0.776852	0.744	0.133	7.91319e-291	7	Il18
	4.83519e-290	2.3399	0.986	0.385	8.41034e-286	7	Lgals7
	2.0416e-287	0.461431	0.457	0.045	3.55116e-283	7	Sytl1
	1.66211e-285	0.683516	0.712	0.122	2.89107e-281	7	Stk26
	4.69302e-285	1.46926	0.945	0.283	8.16303e-281	7	Efemp1
	3.24374e-283	1.62939	0.97	0.381	5.64217e-279	7	Laptm4b
	5.1736e-283	0.596733	0.557	0.071	8.99896e-279	7	Ppl
	1.16513e-282	0.929686	0.811	0.175	2.02663e-278	7	Folr1
	1.52484e-281	0.403966	0.397	0.034	2.65231e-277	7	Rhpn2
	4.37568e-281	0.254775	0.267	0.013	7.61105e-277	7	Gm26873
	2.23144e-280	0.476783	0.427	0.04	3.88137e-276	7	Crym
	8.23247e-278	0.398668	0.445	0.044	1.43196e-273	7	Shtn1
	2.17656e-274	0.336733	0.37	0.029	3.7859e-270	7	Sox6
	4.88117e-270	0.443567	0.368	0.03	8.4903e-266	7	H2-Q6
	5.73898e-262	0.313153	0.306	0.02	9.98238e-258	7	Ccdc92
	1.24383e-261	1.15019	0.854	0.219	2.16352e-257	7	Aplp1
	2.45163e-260	0.637235	0.639	0.107	4.26436e-256	7	Arhgap18
	6.3948e-254	1.1249	0.911	0.303	1.11231e-249	7	Alad
	2.69704e-253	0.576529	0.541	0.075	4.69124e-249	7	Chchd10
	4.82191e-253	1.14132	0.945	0.291	8.38724e-249	7	Ptgs1
	1.30879e-252	0.403797	0.438	0.047	2.2765e-248	7	Spata13
	1.91967e-252	1.08314	0.945	0.336	3.33908e-248	7	Cd2ap
	7.55508e-252	0.438872	0.445	0.049	1.31413e-247	7	Adam33
	8.27917e-249	0.474272	0.397	0.039	1.44008e-244	7	Pkp3
	5.0088e-248	0.462289	0.518	0.068	8.7123e-244	7	Cracr2b
	1.99639e-247	0.623838	0.571	0.087	3.47252e-243	7	Egln3
	1.83315e-242	0.565152	0.596	0.096	3.18859e-238	7	Plxna4
	8.8072e-242	0.582891	0.521	0.073	1.53192e-237	7	Slco2a1
	3.27933e-240	0.384612	0.42	0.045	5.70407e-236	7	Stap2
	4.82019e-239	0.539483	0.459	0.056	8.38423e-235	7	Itga6
	4.35766e-237	0.40075	0.406	0.043	7.57972e-233	7	Bicdl1
	5.9751e-236	0.359863	0.313	0.024	1.03931e-231	7	Fam84a
	7.07616e-236	1.35079	0.991	0.524	1.23083e-231	7	Smim1
	2.5713e-233	0.997982	0.886	0.263	4.47251e-229	7	Cd200
	7.14821e-232	0.423996	0.493	0.066	1.24336e-227	7	Mbp
	1.77369e-229	1.69733	0.989	0.583	3.08516e-225	7	Cpe
	8.43637e-229	0.367396	0.304	0.024	1.46742e-224	7	Itga7
	1.60705e-228	0.855956	0.868	0.257	2.79531e-224	7	Cd82
	5.69319e-228	1.11789	0.947	0.327	9.90273e-224	7	Atp1b1
	1.26961e-227	1.22759	0.854	0.278	2.20836e-223	7	Gm20186
	1.85197e-223	0.713909	0.71	0.156	3.22132e-219	7	Usp53
	2.40828e-223	2.03534	0.991	0.583	4.18895e-219	7	Dmkn
	2.88729e-222	0.411083	0.413	0.048	5.02216e-218	7	Lrrc1
	3.15901e-222	0.309103	0.308	0.025	5.49478e-218	7	Epb41l4a
	2.73679e-221	0.736431	0.776	0.196	4.76038e-217	7	Slc38a1
	2.11376e-219	1.09513	0.525	0.084	3.67668e-215	7	Sfn
	8.08219e-218	0.720636	0.852	0.21	1.40582e-213	7	Cxadr
	9.57098e-217	0.673893	0.683	0.151	1.66478e-212	7	Golm1
	3.3454e-215	0.927322	0.95	0.304	5.819e-211	7	Wt1
	3.80134e-215	0.734197	0.753	0.174	6.61206e-211	7	Frmd4b
	1.9593e-213	0.950947	0.902	0.328	3.40801e-209	7	Tmem98
	4.71901e-213	1.574	0.998	0.838	8.20824e-209	7	H2-K1
	6.79813e-213	0.287757	0.253	0.017	1.18247e-208	7	Ifi27l2b
	7.11786e-211	0.437227	0.482	0.07	1.23808e-206	7	Cobll1
	4.54226e-210	0.880924	0.742	0.17	7.90081e-206	7	Tesc
	9.62214e-208	0.570511	0.589	0.109	1.67367e-203	7	Rtn1
	2.62443e-205	0.569715	0.655	0.139	4.56493e-201	7	Zfp579
	2.96674e-204	1.01237	0.735	0.18	5.16034e-200	7	Cfb
	1.44691e-200	0.772321	0.6	0.123	2.51675e-196	7	H2-Q7
	1.94338e-200	0.656336	0.671	0.152	3.38032e-196	7	Cdh3
	6.4966e-198	0.307685	0.253	0.019	1.13002e-193	7	Lrp2
	7.02593e-196	0.607558	0.34	0.037	1.22209e-191	7	Gng13
	5.36738e-195	0.604119	0.379	0.046	9.33603e-191	7	Trem2
	1.16061e-194	0.74203	0.76	0.213	2.01876e-190	7	Daglb
	1.74333e-193	1.35741	0.998	0.859	3.03235e-189	7	Mgst1
	6.61759e-192	1.22737	0.998	0.913	1.15106e-187	7	Ly6e
	1.3421e-190	0.869658	0.744	0.206	2.33446e-186	7	2200002D01Rik
	5.62827e-190	0.594371	0.703	0.167	9.78981e-186	7	Myrf
	9.62883e-190	0.789642	0.696	0.168	1.67484e-185	7	Tmem108
	2.38503e-188	0.382944	0.445	0.066	4.14852e-184	7	Prkcz
	2.00882e-187	0.404081	0.463	0.072	3.49413e-183	7	Rab11fip1
	7.90988e-187	0.669182	0.678	0.163	1.37585e-182	7	Bicd1
	3.85913e-186	0.518423	0.537	0.099	6.71256e-182	7	Rab6b
	1.02824e-184	1.32614	0.998	0.931	1.78852e-180	7	H2-D1
	1.77767e-183	0.367204	0.279	0.025	3.09208e-179	7	Gipc2
	4.9485e-183	0.30769	0.308	0.032	8.60741e-179	7	Fam84b
	9.43192e-183	1.10417	0.984	0.738	1.64059e-178	7	Creg1
	8.56496e-182	0.847352	0.854	0.283	1.48979e-177	7	Aldh1a2
	1.03643e-181	0.957438	0.895	0.357	1.80276e-177	7	Rpp25
	1.79023e-181	0.601013	0.564	0.117	3.11393e-177	7	Slc16a1
	2.17991e-180	1.16909	1	1	3.79174e-176	7	Crip1
	9.42346e-179	0.876788	0.89	0.338	1.63912e-174	7	Dab2
	3.28472e-178	0.258011	0.258	0.022	5.71345e-174	7	Slc39a4
	2.01023e-177	0.415386	0.454	0.072	3.4966e-173	7	Gata5
	4.96708e-177	0.530089	0.589	0.12	8.63974e-173	7	Nfe2l3
	1.95404e-175	1.37008	0.562	0.117	3.39885e-171	7	Igfbp5
	2.04427e-175	0.711198	0.751	0.206	3.5558e-171	7	Sema3c
	1.18062e-174	0.899459	0.639	0.157	2.05358e-170	7	Tinagl1
	5.55114e-174	0.461625	0.566	0.114	9.65565e-170	7	2310030G06Rik
	4.57436e-173	0.326337	0.313	0.035	7.95663e-169	7	Zdbf2
	1.09734e-171	1.03903	0.998	0.799	1.90872e-167	7	S100a1
	2.68967e-169	0.329041	0.253	0.023	4.67841e-165	7	Kdr
	6.21721e-169	0.708501	0.82	0.27	1.08142e-164	7	Efna5
	7.79182e-169	0.777888	0.436	0.072	1.35531e-164	7	Gjb4
	1.28183e-167	0.409113	0.434	0.07	2.22961e-163	7	Rbm47
	1.33502e-167	0.870824	0.781	0.255	2.32213e-163	7	Tgm2
	1.34338e-166	0.925065	0.708	0.197	2.33668e-162	7	Gpc3
	7.76362e-166	0.884321	0.979	0.697	1.3504e-161	7	Tapbp
	8.59327e-165	0.404746	0.276	0.028	1.49471e-160	7	Serpinb5
	1.0425e-164	0.747126	0.993	0.896	1.81333e-160	7	Vamp8
	6.92965e-164	0.332336	0.324	0.039	1.20534e-159	7	Dsg2
	1.50365e-162	0.574139	0.571	0.126	2.61544e-158	7	Sema3d
	5.27478e-162	0.752717	0.845	0.308	9.17495e-158	7	Syne2
	7.10097e-162	1.19918	1	0.858	1.23514e-157	7	Igfbp6
	8.34344e-162	0.408321	0.463	0.082	1.45126e-157	7	Rab27b
	9.33677e-161	0.572939	0.571	0.13	1.62404e-156	7	1190002N15Rik
	1.45446e-158	0.485711	0.648	0.161	2.5299e-154	7	Stxbp2
	2.96361e-158	1.16338	0.943	0.634	5.15491e-154	7	Acaa2
	3.47945e-158	0.624547	0.767	0.249	6.05215e-154	7	Tpd52
	5.9727e-158	0.949324	0.877	0.34	1.03889e-153	7	Sbsn
	8.77795e-158	0.516316	0.573	0.134	1.52684e-153	7	Eml2
	1.4765e-155	0.949806	0.808	0.319	2.56823e-151	7	Arhgef12
	3.22298e-155	0.858699	0.984	0.731	5.60605e-151	7	Cd151
	4.34816e-150	0.903118	0.966	0.731	7.56319e-146	7	Aplp2
	1.923e-149	0.841207	1	0.965	3.34487e-145	7	Ptgis
	1.01877e-148	0.778417	0.831	0.319	1.77205e-144	7	Cdh11
	1.13554e-148	0.466553	0.511	0.108	1.97516e-144	7	Slc4a4
	6.35546e-148	0.444365	0.308	0.04	1.10547e-143	7	Nnat
	2.04406e-147	0.934358	0.995	0.947	3.55543e-143	7	Prr13
	2.41706e-147	0.582171	0.671	0.183	4.20424e-143	7	Hs3st1
	9.17819e-147	0.537592	0.557	0.133	1.59645e-142	7	Cryl1
	1.44139e-143	0.411993	0.441	0.083	2.50715e-139	7	Tpbgl
	4.23695e-143	0.422539	0.445	0.086	7.36975e-139	7	Arhgef5
	2.83605e-142	1.12572	0.868	0.383	4.93302e-138	7	Lgals3
	3.42783e-141	0.538552	0.605	0.162	5.96236e-137	7	Slc31a2
	4.18494e-141	0.314026	0.361	0.057	7.27929e-137	7	Myo18a
	5.74481e-141	0.840121	0.836	0.336	9.99253e-137	7	Gbp2
	1.47642e-140	0.763821	0.982	0.805	2.56809e-136	7	Iscu
	2.49453e-140	0.353769	0.388	0.066	4.33899e-136	7	Pawr
	2.24797e-139	0.372216	0.326	0.047	3.91011e-135	7	Slc6a4
	3.74858e-138	0.468626	0.484	0.104	6.52027e-134	7	Net1
	9.04149e-138	1.44262	0.97	0.653	1.57268e-133	7	C3
	1.33335e-137	0.316459	0.368	0.06	2.31923e-133	7	Met
	2.04707e-137	0.468515	0.422	0.077	3.56067e-133	7	Hdc
	7.46962e-136	0.589239	0.712	0.238	1.29927e-131	7	Ddr1
	1.7966e-135	0.547573	0.345	0.053	3.12501e-131	7	Calcb
	8.90687e-135	0.40854	0.447	0.088	1.54926e-130	7	Limch1
	9.64743e-134	1.05857	0.639	0.193	1.67807e-129	7	Has1
	3.55961e-133	0.80577	0.897	0.441	6.19158e-129	7	Oasl2
	6.38143e-133	0.492217	0.607	0.162	1.10999e-128	7	Smtnl2
	7.61985e-133	0.409173	0.429	0.085	1.3254e-128	7	Parvb
	3.07991e-132	0.841616	1	0.898	5.3572e-128	7	Tmem176b
	5.04213e-132	0.449366	0.566	0.145	8.77029e-128	7	Plekhb2
	1.08375e-130	0.258395	0.292	0.04	1.88507e-126	7	Crb2
	2.21061e-130	0.437887	0.537	0.131	3.84513e-126	7	Zcchc3
	6.22689e-130	1.99346	0.79	0.329	1.0831e-125	7	Slpi
	1.0537e-129	0.870522	0.991	0.826	1.83281e-125	7	Gm12840
	7.58479e-129	0.904051	0.959	0.611	1.3193e-124	7	Trf
	1.59103e-128	0.84436	0.911	0.517	2.76743e-124	7	Card19
	1.78051e-128	0.650104	0.708	0.243	3.09702e-124	7	Kiz
	2.64286e-128	0.728398	0.968	0.754	4.59699e-124	7	Dync1i2
	2.64847e-128	1.20137	0.979	0.9	4.60675e-124	7	Tm4sf1
	3.95211e-128	0.639365	1	0.967	6.8743e-124	7	1810037I17Rik
	7.85424e-128	0.740016	0.943	0.547	1.36617e-123	7	Rbpms
	1.61835e-127	0.470205	0.628	0.179	2.81496e-123	7	Ildr2
	4.16161e-127	1.20199	0.774	0.342	7.2387e-123	7	C1qtnf12
	4.39451e-127	0.398722	0.295	0.042	7.64381e-123	7	Fam180a
	6.27532e-127	0.359602	0.361	0.063	1.09153e-122	7	Bcar3
	9.10969e-127	0.674006	0.804	0.324	1.58454e-122	7	Arhgap29
	4.83526e-126	0.37689	0.445	0.092	8.41045e-122	7	Arl4d
	1.02117e-125	0.359309	0.406	0.078	1.77622e-121	7	Dusp5
	4.60357e-125	0.479956	0.534	0.135	8.00745e-121	7	Il18bp
	3.33672e-124	0.694152	0.975	0.743	5.80389e-120	7	Psme1
	7.19405e-124	0.868989	0.943	0.653	1.25133e-119	7	Pdpn
	4.50538e-122	0.697036	0.82	0.34	7.83667e-118	7	Isyna1
	4.6024e-122	0.579165	0.747	0.281	8.00542e-118	7	Ptprf
	8.11327e-122	0.305975	0.384	0.072	1.41122e-117	7	Plekhg5
	1.17697e-121	0.298095	0.338	0.056	2.04722e-117	7	Slc7a4
	1.30089e-121	0.823201	0.938	0.559	2.26278e-117	7	Irf7
	1.93646e-121	0.756938	0.795	0.327	3.36828e-117	7	Serpinb6b
	2.20143e-121	0.564107	0.703	0.247	3.82917e-117	7	Tmem238
	1.53057e-120	0.641873	0.785	0.325	2.66227e-116	7	Gabarapl1
	3.14477e-120	0.78306	0.829	0.39	5.47001e-116	7	Cxcl16
	3.92233e-120	0.680088	0.986	0.937	6.82249e-116	7	Cyb5r3
	5.31811e-119	0.720855	0.945	0.582	9.25032e-115	7	Arhgdib
	1.88387e-118	0.842336	1	0.996	3.27681e-114	7	B2m
	1.96136e-118	0.507627	0.559	0.16	3.41159e-114	7	Mmd
	5.74365e-118	0.808546	1	1	9.99051e-114	7	Fth1
	1.24479e-117	0.890326	0.945	0.62	2.16518e-113	7	Sdc4
	2.46817e-117	0.697508	0.676	0.234	4.29314e-113	7	Bace2
	6.57866e-117	0.763816	0.995	0.876	1.14429e-112	7	Cryab
	2.20947e-116	0.305245	0.384	0.074	3.84315e-112	7	Mtss1
	3.57193e-116	0.398155	0.511	0.126	6.21302e-112	7	Nxnl2
	1.77218e-115	0.382857	0.42	0.09	3.08252e-111	7	St3gal6
	2.27929e-115	0.415883	0.546	0.149	3.9646e-111	7	Zbtb7c
	2.95658e-115	0.665021	0.605	0.192	5.14268e-111	7	Abcb1b
	4.01978e-115	0.661025	0.482	0.119	6.99201e-111	7	Wfdc1
	7.49697e-115	0.575492	1	0.98	1.30402e-110	7	Cyb5a
[truncated: 1,711 more rows]

## Sheet: (B) aCSC
aCSC	p_val	avg_logFC	pct.1	pct.2	p_val_adj	cluster	gene
	0	1.59563	0.987	0.802	0	1	Sfrp2
	0	1.42131	0.978	0.686	0	1	Wisp2
	0	1.33155	0.957	0.767	0	1	Eln
	0	1.05032	0.726	0.329	0	1	Vegfd
	0	0.949029	0.996	0.843	0	1	Sfrp1
	0	0.881524	0.901	0.512	0	1	Pdlim3
	0	0.746718	0.88	0.577	0	1	1500015O10Rik
	0	0.70669	0.813	0.445	0	1	Adamtsl2
	0	0.691991	1	0.978	0	1	Mfap4
	0	0.678934	1	1	0	1	Cst3
	0	0.65994	0.876	0.565	0	1	Id2
	0	0.613479	0.446	0.122	0	1	Matn4
	0	0.60067	0.993	0.932	0	1	Cthrc1
	0	0.599283	0.539	0.253	0	1	Ada
	0	0.590974	0.969	0.827	0	1	Tmem45a
	0	0.585299	0.705	0.369	0	1	Comp
	0	0.584615	0.978	0.837	0	1	Fbln5
	0	0.514263	0.934	0.742	0	1	Gxylt2
	0	0.500118	0.703	0.363	0	1	Gucy1a1
	0	0.493345	0.988	0.878	0	1	Lox
	0	0.491373	0.997	0.967	0	1	Id3
	0	0.490614	0.96	0.794	0	1	Sod3
	0	0.489628	0.829	0.55	0	1	Nedd9
	0	0.484511	0.951	0.772	0	1	Lbh
	0	0.47953	0.827	0.592	0	1	Frzb
	0	0.45908	0.931	0.727	0	1	Gas6
	0	0.454596	0.506	0.16	0	1	Grb14
	0	0.450874	0.999	0.989	0	1	Fn1
	0	0.448924	0.997	0.946	0	1	Adamts2
	0	0.446156	0.961	0.809	0	1	Timp3
	0	0.438214	0.868	0.639	0	1	Tcf21
	0	0.433614	0.984	0.852	0	1	Fxyd6
	0	0.432661	0.979	0.86	0	1	Col14a1
	0	0.41504	1	1	0	1	Col3a1
	0	0.407786	0.997	0.923	0	1	Ogn
	0	0.393283	0.953	0.774	0	1	Pdgfrl
	0	0.38387	0.979	0.888	0	1	Fbln1
	0	0.379906	0.604	0.306	0	1	Gng8
	0	0.376486	0.618	0.348	0	1	Gucy1b1
	0	0.37628	0.995	0.968	0	1	Mmp23
	0	0.369819	0.985	0.897	0	1	Itgb5
	0	0.361279	0.829	0.598	0	1	C1qtnf2
	0	0.357001	0.593	0.313	0	1	Col8a2
	0	0.350724	0.966	0.89	0	1	Il11ra1
	0	0.350637	0.367	0.099	0	1	Gm26771
	0	0.346936	0.974	0.888	0	1	Pmepa1
	0	0.297184	0.407	0.165	0	1	Kcne4
	0	0.267335	1	0.997	0	1	Loxl1
	7.09467e-306	0.411862	0.538	0.278	1.27583e-301	1	Rgs4
	1.10214e-300	0.360156	0.898	0.691	1.98197e-296	1	Itgbl1
	6.96757e-300	0.291752	0.499	0.246	1.25298e-295	1	Pcdh9
	7.62221e-293	0.287036	0.457	0.217	1.3707e-288	1	Fam13c
	1.07142e-288	0.35375	0.631	0.384	1.92673e-284	1	Fas
	5.00061e-284	0.319241	0.695	0.446	8.99259e-280	1	4931406P16Rik
	8.03774e-272	0.307185	0.89	0.696	1.44543e-267	1	Thbs2
	5.10434e-269	0.256014	0.377	0.16	9.17914e-265	1	Ephx2
	1.55177e-267	0.337173	0.891	0.723	2.79055e-263	1	Matn2
	9.36243e-260	0.251789	0.382	0.165	1.68365e-255	1	Epha7
	6.9039e-252	0.266142	0.926	0.676	1.24153e-247	1	Ddah1
	3.07638e-251	0.303397	0.759	0.526	5.53225e-247	1	Smpdl3a
	2.33563e-247	0.289751	0.552	0.322	4.20017e-243	1	Itsn1
	9.20282e-247	0.32377	0.913	0.789	1.65494e-242	1	2011-09-01
	2.74962e-245	0.364319	0.926	0.754	4.94465e-241	1	Ctgf
	3.27282e-245	0.309677	0.51	0.286	5.88552e-241	1	Fbxl7
	5.5035e-244	0.292066	0.428	0.206	9.89694e-240	1	Stc2
	4.3945e-235	0.415433	0.72	0.509	7.90264e-231	1	Cd200
	2.61918e-233	0.311994	1	0.979	4.71008e-229	1	Postn
	1.45452e-232	0.293448	0.732	0.493	2.61566e-228	1	P4ha3
	2.84121e-227	0.296368	0.798	0.618	5.10936e-223	1	Ssbp2
	1.66616e-225	0.306946	0.947	0.857	2.99626e-221	1	Actn1
	4.28193e-224	0.251368	0.462	0.246	7.70019e-220	1	Nbea
	1.02362e-222	0.319171	0.792	0.622	1.84078e-218	1	Picalm
	5.48008e-221	0.305999	0.938	0.895	9.85482e-217	1	Comt
	7.55397e-218	0.292885	0.259	0.096	1.35843e-213	1	Nov
	3.80557e-217	0.347143	0.844	0.702	6.84356e-213	1	Dclk1
	5.11547e-217	0.388011	0.962	0.875	9.19914e-213	1	Ptn
	9.40678e-212	0.28593	0.872	0.699	1.69162e-207	1	Tgfb3
	1.39756e-210	0.328693	0.846	0.694	2.51323e-206	1	Fam198b
	2.17124e-210	0.285413	0.688	0.48	3.90454e-206	1	Phldb2
	1.38133e-209	0.257649	0.973	0.88	2.48405e-205	1	Ypel3
	2.03096e-208	0.29533	0.959	0.899	3.65227e-204	1	Mfap2
	3.39122e-205	0.269116	0.589	0.378	6.09843e-201	1	Sh3bp5
	6.24018e-197	0.252968	0.577	0.362	1.12217e-192	1	Adarb1
	6.81448e-190	0.276494	0.71	0.526	1.22545e-185	1	2310022B05Rik
	1.01307e-189	0.258311	0.754	0.558	1.8218e-185	1	Gpc6
	1.80659e-185	0.272903	0.427	0.236	3.24878e-181	1	Tmem158
	4.48018e-179	0.270571	0.984	0.949	8.05671e-175	1	Marcks
	6.48213e-174	0.263864	0.651	0.457	1.16568e-169	1	Mn1
	1.52127e-163	0.437965	0.614	0.433	2.73571e-159	1	Serpina3n
	1.61447e-156	0.611493	0.577	0.385	2.90329e-152	1	Wfdc18
	1.18149e-155	0.253297	0.958	0.905	2.12468e-151	1	Hcfc1r1
	2.26239e-155	0.288865	0.331	0.17	4.06846e-151	1	Lmcd1
	3.67935e-130	0.280446	0.985	0.912	6.61657e-126	1	Pam
	4.36331e-105	0.264186	0.745	0.61	7.84655e-101	1	Fhl2
	1.17112e-50	0.345878	0.466	0.362	2.10602e-46	1	Osr1
	0	1.53628	0.66	0.24	0	2	Thbs4
	0	1.24191	0.957	0.668	0	2	Cilp
	0	0.914477	0.944	0.673	0	2	Ddah1
	0	0.881753	0.732	0.35	0	2	Crlf1
	0	0.845711	0.848	0.526	0	2	Rflnb
	0	0.797205	0.381	0.156	0	2	Mest
	0	0.791115	0.981	0.758	0	2	Col15a1
	0	0.756603	0.982	0.866	0	2	Oaf
	0	0.73764	0.759	0.487	0	2	Tnc
	0	0.733503	0.942	0.673	0	2	Meox1
	0	0.707512	0.478	0.151	0	2	Scx
	0	0.706832	0.595	0.297	0	2	Fmod
	0	0.700208	0.772	0.545	0	2	Thbs1
	0	0.657327	1	0.979	0	2	Postn
	0	0.616315	0.868	0.683	0	2	Tspan6
	0	0.615144	1	0.974	0	2	Mfap5
	0	0.610208	0.895	0.627	0	2	Ltbp2
	0	0.603061	1	0.902	0	2	Col8a1
	0	0.579811	0.888	0.717	0	2	Fibin
	0	0.577776	0.805	0.44	0	2	Enpp1
	0	0.571636	0.71	0.387	0	2	Rnf149
	0	0.551858	0.972	0.843	0	2	Col4a1
	0	0.530228	0.996	0.918	0	2	Aspn
	0	0.521044	0.925	0.744	0	2	Col4a2
	0	0.519629	0.662	0.318	0	2	Nkd2
	0	0.517042	0.654	0.393	0	2	Col12a1
	0	0.507738	0.962	0.809	0	2	Vamp5
	0	0.506548	0.669	0.398	0	2	Bhlhe41
	0	0.466571	0.997	0.926	0	2	Emp1
	0	0.45207	1	0.992	0	2	Col5a2
	0	0.447926	0.938	0.752	0	2	Ctgf
	0	0.433678	0.672	0.403	0	2	Tgfb1
	0	0.403165	1	0.997	0	2	Rbp1
	0	0.388907	0.597	0.295	0	2	Gm15867
	0	0.387238	0.656	0.363	0	2	Ttll5
	0	0.345042	0.326	0.098	0	2	Aqp2
	0	0.332135	0.996	0.976	0	2	Cnn3
	0	0.326341	0.996	0.978	0	2	Col6a1
	0	0.274509	1	0.984	0	2	Serpinf1
	3.08749e-307	0.727485	0.482	0.242	5.55224e-303	2	Spp1
	1.17431e-303	0.494153	0.778	0.571	2.11176e-299	2	Ccnd2
	1.33791e-298	0.250799	1	1	2.40596e-294	2	Myl12a
	9.18032e-297	0.467711	0.869	0.695	1.6509e-292	2	Palld
	6.50675e-294	0.381853	0.657	0.397	1.17011e-289	2	Runx1
	7.63038e-294	0.340428	0.437	0.197	1.37217e-289	2	Dusp6
	5.80909e-293	0.409217	0.765	0.51	1.04465e-288	2	Wisp1
	5.0245e-292	0.491928	0.575	0.311	9.03555e-288	2	Cst6
	3.70837e-290	0.34798	0.809	0.599	6.66876e-286	2	Creb3l2
	7.35875e-290	0.517953	0.993	0.981	1.32332e-285	2	Timp1
	1.55918e-283	0.361628	0.788	0.559	2.80388e-279	2	Ecm2
	3.72732e-283	0.459188	0.98	0.936	6.70284e-279	2	Cthrc1
	8.79294e-283	0.337789	0.816	0.586	1.58123e-278	2	F2r
	1.69298e-281	0.302624	1	1	3.04448e-277	2	Igfbp7
	1.02229e-277	0.349803	0.722	0.463	1.83838e-273	2	Rasl11b
	1.68429e-274	0.277321	0.996	0.99	3.02886e-270	2	Sh3bgrl3
	1.35115e-273	0.611551	0.93	0.81	2.42977e-269	2	Serpine2
	3.77875e-271	0.388569	0.585	0.327	6.79533e-267	2	Ass1
	6.86286e-271	0.527654	0.924	0.8	1.23415e-266	2	Tagln
	1.95534e-267	0.297866	0.983	0.963	3.5163e-263	2	Sub1
	1.22587e-266	0.273868	0.399	0.177	2.20449e-262	2	Ank
	4.67867e-264	0.391014	0.899	0.781	8.41366e-260	2	Lmo4
	1.07329e-258	0.351325	0.83	0.634	1.9301e-254	2	Loxl3
	1.57876e-256	0.332162	0.993	0.964	2.83909e-252	2	Col6a2
	6.95565e-254	0.34987	0.889	0.764	1.25083e-249	2	Plod2
	2.22514e-252	0.333394	0.323	0.13	4.00146e-248	2	Slc20a1
	2.89294e-252	0.276701	0.952	0.841	5.20238e-248	2	Serf1
	2.47098e-244	0.321395	0.649	0.42	4.44355e-240	2	Mical2
	8.76066e-233	0.341888	0.974	0.883	1.57543e-228	2	Lox
	3.39515e-232	0.313322	0.348	0.152	6.10549e-228	2	Col9a2
	2.90883e-231	0.345519	0.68	0.455	5.23096e-227	2	Nrep
	1.02232e-213	0.306348	0.956	0.829	1.83843e-209	2	Srpx2
	1.95354e-212	0.269316	0.868	0.713	3.51305e-208	2	Pld3
	1.04043e-209	0.272873	0.479	0.265	1.871e-205	2	Kctd12
	1.57208e-209	0.267698	0.967	0.896	2.82707e-205	2	Emilin1
	3.80758e-208	0.293994	0.913	0.815	6.84717e-204	2	Pls3
	1.21667e-199	0.299818	0.799	0.615	2.18794e-195	2	Sox4
	9.02935e-194	0.263132	0.986	0.967	1.62375e-189	2	Sh3glb1
	4.2409e-191	0.258082	0.925	0.815	7.62641e-187	2	Golga7
	1.03902e-187	0.27566	0.341	0.16	1.86847e-183	2	Egr2
	9.13601e-187	0.285771	0.864	0.69	1.64293e-182	2	Fam198b
	1.25041e-184	0.271071	0.713	0.517	2.24861e-180	2	Dok1
	1.81909e-184	0.288532	0.931	0.782	3.27128e-180	2	Pdgfrl
	4.05809e-175	0.280832	0.454	0.261	7.29767e-171	2	Pamr1
	8.35902e-173	0.753173	0.377	0.203	1.5032e-168	2	C1qtnf3
	7.2364e-170	0.338028	0.969	0.92	1.30132e-165	2	Lsp1
	6.03833e-169	0.362237	0.885	0.784	1.08587e-164	2	Col6a3
	1.28579e-164	0.309829	0.996	0.99	2.31224e-160	2	Fn1
	7.43302e-152	0.250477	0.814	0.66	1.33668e-147	2	Col16a1
	1.33018e-149	0.271092	0.989	0.976	2.39206e-145	2	Ctsd
	1.33534e-147	0.279286	0.686	0.501	2.40135e-143	2	Clec11a
	2.13152e-139	0.259868	1	1	3.83312e-135	2	Tmsb4x
	3.00402e-134	0.258867	0.695	0.519	5.40213e-130	2	Cd200
	9.907e-131	0.568824	0.563	0.391	1.78157e-126	2	Wfdc18
	4.81425e-121	0.266132	0.808	0.696	8.65747e-117	2	Pdlim1
	3.56566e-118	0.362266	0.999	0.998	6.41214e-114	2	Mgp
	1.34239e-63	0.253588	0.586	0.465	2.41402e-59	2	Serpine1
	2.09014e-29	0.353543	0.339	0.271	3.7587e-25	2	Cdkn1a
	0	1.12474	0.963	0.932	0	3	Acta2
	0	0.901447	0.963	0.884	0	3	Tpm2
	0	0.879684	0.69	0.21	0	3	Glipr1
	0	0.821464	0.878	0.666	0	3	Myl9
	0	0.817938	0.611	0.226	0	3	Ddit4l
	0	0.762193	0.69	0.264	0	3	Col11a1
	0	0.72961	0.889	0.719	0	3	Thbs2
	0	0.697018	1	1	0	3	Col1a1
	0	0.623134	0.871	0.642	0	3	Cxcl12
	0	0.596057	0.812	0.472	0	3	P4ha2
	0	0.592624	1	1	0	3	Col1a2
	0	0.584273	0.954	0.838	0	3	Mmp14
	0	0.55793	0.997	0.99	0	3	Csrp2
	0	0.503947	0.69	0.383	0	3	Nt5dc2
	0	0.484636	0.849	0.524	0	3	Wisp1
	0	0.428727	0.737	0.407	0	3	Cdh2
	0	0.345289	0.38	0.095	0	3	Ctsc
	0	0.321405	1	1	0	3	Rpl41
	0	0.300963	1	1	0	3	Cd63
	0	0.285873	0.379	0.111	0	3	Slc38a4
	1.0364e-301	0.512175	0.666	0.361	1.86376e-297	3	Ncam1
	3.09437e-301	0.609842	0.983	0.957	5.56461e-297	3	Mif
	4.64082e-286	0.782024	0.944	0.888	8.34559e-282	3	Ptn
	5.72264e-284	0.852558	0.663	0.386	1.0291e-279	3	Plac8
	7.97472e-275	0.526759	0.308	0.092	1.43409e-270	3	Cnn1
	2.2743e-265	0.293302	0.448	0.179	4.08988e-261	3	Hs6st2
	1.79365e-264	0.320219	1	1	3.22551e-260	3	Sparc
	1.08806e-262	0.416413	0.997	0.993	1.95666e-258	3	Npm1
	7.67842e-262	0.262913	1	1	1.38081e-257	3	Sec61g
	1.01311e-251	0.290203	0.33	0.109	1.82187e-247	3	Steap1
	4.48547e-250	0.330321	0.984	0.958	8.06622e-246	3	Rcn1
	3.60019e-245	0.364063	0.931	0.778	6.47422e-241	3	Vmp1
	7.5901e-245	0.507722	0.908	0.788	1.36493e-240	3	Cnn2
	2.77233e-243	0.433946	0.915	0.707	4.98548e-239	3	Palld
	1.6526e-241	0.325395	0.545	0.261	2.97187e-237	3	Kif26b
	4.14752e-240	0.541371	0.854	0.69	7.45849e-236	3	Fkbp11
	1.02051e-239	0.413423	0.738	0.469	1.83519e-235	3	Lrrc17
	5.69442e-236	0.259388	1	1	1.02403e-231	3	Serpinh1
	8.02729e-228	0.279277	0.459	0.202	1.44355e-223	3	Azin2
	3.38506e-224	0.34204	0.999	0.997	6.08735e-220	3	Sec61b
	3.15145e-222	0.379562	0.784	0.538	5.66726e-218	3	Slc38a2
	4.89697e-222	0.362206	0.346	0.129	8.80622e-218	3	Asns
	7.53687e-220	0.253077	0.303	0.101	1.35536e-215	3	Plagl1
	5.90435e-217	0.442236	0.373	0.15	1.06178e-212	3	Des
	4.19537e-215	0.328258	0.789	0.542	7.54453e-211	3	Pdia5
	1.58207e-211	0.522057	0.954	0.915	2.84504e-207	3	Tpm1
	1.40306e-210	0.321081	0.795	0.512	2.52312e-206	3	P4ha3
	3.08365e-209	0.342345	0.566	0.309	5.54532e-205	3	Nxn
	7.15093e-207	0.303766	1	1	1.28595e-202	3	Rpl27a
	8.94191e-204	0.341965	0.989	0.959	1.60802e-199	3	Col5a1
	4.92699e-201	0.899508	0.579	0.346	8.86021e-197	3	H19
	4.19861e-200	0.307793	0.996	0.995	7.55036e-196	3	Rrbp1
	1.73386e-199	0.422356	0.753	0.526	3.118e-195	3	Creb3l1
	3.12051e-199	0.353083	0.986	0.978	5.61162e-195	3	Eef1b2
	1.11763e-198	0.360653	0.396	0.174	2.00984e-194	3	Hk2
	1.17421e-197	0.348656	0.971	0.933	2.11159e-193	3	Maged2
	5.09988e-196	0.30056	0.998	0.998	9.17111e-192	3	Rcn3
	8.92859e-196	0.663568	0.908	0.816	1.60563e-191	3	Tagln
	9.32675e-195	0.379256	0.767	0.547	1.67723e-190	3	Hif1a
	1.58054e-189	0.303775	0.623	0.367	2.84228e-185	3	Limd2
	1.07281e-188	0.391708	0.859	0.722	1.92924e-184	3	Fkbp10
	1.3072e-185	0.414993	1	1	2.35075e-181	3	Actg1
	2.49137e-185	0.318055	0.994	0.989	4.48024e-181	3	Ssr2
	2.06227e-184	0.343196	1	1	3.70857e-180	3	Rpsa
	1.11849e-183	0.314711	0.947	0.876	2.01137e-179	3	Bmp1
	1.1636e-183	0.403066	0.957	0.916	2.0925e-179	3	Kdelr2
	5.80883e-183	0.341361	0.993	0.99	1.0446e-178	3	Rack1
	5.83828e-179	0.263125	0.986	0.966	1.0499e-174	3	Maged1
	9.01611e-176	0.265518	1	1	1.62137e-171	3	Rps27a
	3.01551e-175	0.287627	0.997	0.995	5.42279e-171	3	Rpl5
	5.71093e-173	0.322815	0.92	0.84	1.027e-168	3	Abracl
	2.66243e-170	0.316574	0.998	0.998	4.78785e-166	3	Eef1g
	7.85348e-170	0.293426	1	1	1.41229e-165	3	Rpl10a
	1.9935e-169	0.277864	0.423	0.199	3.58491e-165	3	Cpz
	4.15288e-166	0.280233	0.441	0.226	7.46812e-162	3	Bcat1
	1.54821e-164	0.284583	1	1	2.78415e-160	3	Col3a1
	3.47361e-164	0.348667	0.775	0.586	6.24659e-160	3	Prrx1
	4.56079e-161	0.338925	0.996	0.994	8.20167e-157	3	Rpl12
	9.4937e-157	0.346913	0.837	0.666	1.70725e-152	3	Tmem176a
	6.33834e-156	0.798789	0.507	0.288	1.13982e-151	3	Hp
	7.18638e-150	0.350563	0.775	0.592	1.29233e-145	3	Ctsh
	7.81663e-150	0.307767	0.956	0.933	1.40567e-145	3	P4hb
	9.23959e-150	0.286258	0.846	0.654	1.66156e-145	3	Foxp1
	8.31715e-146	0.297283	0.989	0.985	1.49567e-141	3	Cald1
	2.43965e-145	0.302572	0.664	0.424	4.38722e-141	3	Runx1
	3.4338e-145	0.26774	0.998	0.998	6.17501e-141	3	Rps27l
	3.71815e-143	0.300135	0.72	0.51	6.68634e-139	3	Tcea3
	1.75947e-141	0.262223	0.457	0.248	3.16405e-137	3	Tuba1c
	1.0609e-139	0.30897	0.821	0.669	1.90782e-135	3	Wdr1
	1.06765e-139	0.265821	0.655	0.435	1.91995e-135	3	Sdc1
	7.14334e-139	0.252091	0.998	0.991	1.28459e-134	3	Fn1
	1.02881e-138	0.395547	0.441	0.245	1.85011e-134	3	Slc16a3
	1.57598e-138	0.265013	0.928	0.84	2.83408e-134	3	Tmem176b
	1.35545e-137	0.266748	1	0.999	2.43751e-133	3	Rps26
	1.39428e-136	0.329857	0.999	0.999	2.50733e-132	3	Rps12
	2.12008e-135	0.266425	0.563	0.343	3.81254e-131	3	Mpp6
	4.12506e-135	0.341269	0.736	0.562	7.41809e-131	3	Gars
	6.75763e-135	0.324523	1	1	1.21523e-130	3	Rps2
	1.70581e-134	0.274887	1	0.998	3.06755e-130	3	Rpl29
	3.65601e-134	0.306439	0.688	0.496	6.57461e-130	3	Hacd1
	4.93364e-133	0.289583	0.999	0.996	8.87216e-129	3	Rps10
	3.6662e-132	0.260587	0.718	0.5	6.59293e-128	3	Phldb2
	5.63287e-132	0.259687	0.986	0.982	1.01296e-127	3	Rpl13a
	1.01548e-131	0.668784	0.337	0.166	1.82614e-127	3	Ccl9
	2.33684e-130	0.279753	1	1	4.20235e-126	3	Rps20
	2.44492e-130	0.27852	0.84	0.68	4.3967e-126	3	Siva1
	5.88585e-129	0.257937	1	1	1.05845e-124	3	Rps17
	4.85731e-127	0.482608	0.939	0.912	8.73489e-123	3	Meg3
	1.05847e-126	0.264012	0.673	0.475	1.90344e-122	3	Ak2
	9.03424e-125	0.285999	0.978	0.966	1.62463e-120	3	Gm10076
	1.62487e-123	0.286765	0.748	0.57	2.92201e-119	3	Snhg6
	9.38297e-123	0.275784	0.476	0.276	1.68734e-118	3	Gm12840
	2.87637e-118	0.253219	0.999	0.998	5.17258e-114	3	Rps21
	8.26096e-118	0.305608	0.898	0.811	1.48557e-113	3	Eif4ebp1
	3.9171e-116	0.43044	0.759	0.637	7.04412e-112	3	Lrrc59
	5.15346e-115	0.328501	0.953	0.928	9.26746e-111	3	Ckap4
	1.3039e-114	0.254588	0.545	0.343	2.3448e-110	3	Ecscr
	4.70603e-113	0.420116	0.826	0.746	8.46285e-109	3	Csrp1
	3.32827e-111	0.318038	0.688	0.519	5.98523e-107	3	Filip1l
	8.05939e-111	0.417165	0.977	0.98	1.44932e-106	3	Gapdh
	1.30421e-110	0.292384	0.973	0.963	2.34535e-106	3	Hspe1
	1.01626e-107	0.25321	0.765	0.606	1.82753e-103	3	Vasp
	1.25789e-106	0.279348	0.801	0.653	2.26206e-102	3	Lpp
	2.4039e-106	0.307689	0.902	0.864	4.32293e-102	3	Prelid1
	5.18189e-106	0.359361	0.863	0.801	9.31859e-102	3	Mdk
	3.55178e-100	0.299718	0.811	0.704	6.38716e-96	3	Prdx6
	1.03415e-98	0.424622	0.917	0.895	1.85972e-94	3	Eno1
	9.9222e-98	0.441492	0.837	0.772	1.78431e-93	3	Pgk1
	6.02495e-97	0.280685	0.607	0.425	1.08347e-92	3	Gadd45b
	3.86528e-96	0.270629	0.738	0.598	6.95093e-92	3	Sulf2
	5.4593e-95	0.420096	0.987	0.983	9.81745e-91	3	Timp1
	1.10406e-94	0.266037	0.641	0.465	1.98543e-90	3	Basp1
	2.25814e-94	0.436876	0.585	0.422	4.06082e-90	3	Gucy1a1
	1.88924e-93	0.328853	0.501	0.342	3.39743e-89	3	Tmem97
	8.05146e-92	0.287778	0.434	0.267	1.44789e-87	3	Inhba
	2.93882e-91	0.284075	0.613	0.44	5.28488e-87	3	Ccng1
	5.34615e-91	0.349667	0.654	0.505	9.61398e-87	3	Dhrs3
	6.99744e-88	0.362487	0.919	0.897	1.25835e-83	3	Mt1
	2.84543e-86	0.263728	0.969	0.959	5.11694e-82	3	Rbm3
	5.35456e-86	0.30831	0.727	0.591	9.6291e-82	3	Ppa1
	6.91993e-86	0.255387	0.593	0.417	1.24441e-81	3	Fam46a
	5.12782e-80	0.501009	0.721	0.61	9.22136e-76	3	Mt2
	1.17868e-77	0.272874	0.843	0.781	2.11962e-73	3	Flna
	1.65418e-76	0.363027	0.735	0.632	2.97471e-72	3	Srm
	2.00196e-76	0.339912	0.842	0.785	3.60012e-72	3	Tpi1
	1.02136e-75	0.87877	0.272	0.148	1.83671e-71	3	Cxcl5
	3.78045e-75	0.293262	0.563	0.402	6.79838e-71	3	Il33
	9.40296e-73	0.279456	0.588	0.425	1.69093e-68	3	Gadd45g
	2.65431e-67	0.36885	0.649	0.529	4.77324e-63	3	Isg15
	1.1187e-65	0.251879	0.883	0.847	2.01176e-61	3	Hnrnpa1
	2.9888e-65	0.293556	0.381	0.25	5.37476e-61	3	Tubb3
	5.89237e-65	0.69659	0.367	0.248	1.05962e-60	3	Cxcl1
	5.89574e-64	0.342285	0.965	0.965	1.06023e-59	3	Pkm
	1.14698e-63	0.263106	0.82	0.751	2.06262e-59	3	Fscn1
	1.63615e-63	0.256113	0.728	0.607	2.94228e-59	3	Nhp2
	2.57171e-62	0.266879	0.447	0.311	4.62471e-58	3	Tgfbi
	5.735e-60	0.26942	0.967	0.963	1.03133e-55	3	Slc25a5
	1.76218e-58	0.294706	0.707	0.581	3.16894e-54	3	Thbs1
	5.28291e-57	0.282743	0.497	0.368	9.50026e-53	3	Phgdh
	2.10186e-55	0.298802	0.529	0.403	3.77977e-51	3	Btg2
	8.10161e-52	0.277288	0.887	0.875	1.45691e-47	3	Bst2
	3.13158e-50	0.317762	0.981	0.984	5.63151e-46	3	Ldha
	1.79783e-39	0.306435	0.739	0.663	3.23304e-35	3	Hspd1
	1.02814e-34	0.269265	0.908	0.91	1.8489e-30	3	Nme1
	1.69607e-32	0.312931	0.371	0.273	3.05005e-28	3	Cdkn1a
	3.45502e-31	0.314637	0.579	0.502	6.21317e-27	3	Ier3
	1.92734e-21	0.78037	0.369	0.287	3.46594e-17	3	Spp1
	1.67201e-20	0.31931	0.43	0.359	3.00678e-16	3	AC160336.1
	1.45567e-10	0.264831	0.534	0.486	2.61773e-06	3	Serpine1
	7.25902e-09	0.422039	0.797	0.889	0.000130539	3	Itm2a
	0	1.71703	0.996	0.769	0	4	Pi16
	0	1.26168	1	0.993	0	4	Gsn
	0	1.07251	0.949	0.706	0	4	Smoc2
	0	1.03794	0.957	0.548	0	4	Gstm1
	0	1.0355	0.967	0.618	0	4	Sparcl1
	0	1.02488	0.814	0.382	0	4	Tppp3
	0	0.975604	0.866	0.465	0	4	Clec3b
	0	0.974438	0.997	0.824	0	4	Cd34
	0	0.943859	0.988	0.816	0	4	Ckb
	0	0.924813	0.684	0.233	0	4	Ccnd1
	0	0.884293	0.859	0.322	0	4	Tnxb
	0	0.874701	0.557	0.157	0	4	Ackr3
	0	0.868951	0.983	0.764	0	4	Htra3
	0	0.848728	0.999	0.868	0	4	Pmp22
	0	0.830556	0.908	0.614	0	4	Ly6a
	0	0.818789	0.743	0.272	0	4	Pla1a
	0	0.815823	0.998	0.858	0	4	Crip2
	0	0.778078	1	0.939	0	4	S100a10
	0	0.769556	0.995	0.908	0	4	Ifi27l2a
	0	0.759074	0.991	0.844	0	4	Ltbp4
	0	0.75325	0.848	0.473	0	4	Abca8a
	0	0.750487	0.825	0.478	0	4	Adamts5
	0	0.727356	0.792	0.478	0	4	Klf4
	0	0.721087	0.983	0.888	0	4	Cd9
	0	0.713661	0.68	0.216	0	4	Vwa1
	0	0.711142	0.954	0.809	0	4	Ugp2
	0	0.710227	0.806	0.446	0	4	Camk2n1
	0	0.70436	0.613	0.237	0	4	Ackr4
	0	0.702976	0.951	0.66	0	4	Entpd2
	0	0.702028	0.742	0.366	0	4	Pcsk6
	0	0.69557	0.85	0.634	0	4	Uap1
	0	0.690823	1	0.999	0	4	Crip1
	0	0.682284	0.96	0.785	0	4	Axl
	0	0.676328	0.985	0.839	0	4	Lamc1
	0	0.676013	0.898	0.647	0	4	Pcolce2
	0	0.653364	0.559	0.196	0	4	Kcnk2
	0	0.647064	0.713	0.395	0	4	Selenbp1
	0	0.630844	0.366	0.05	0	4	Efhd1
	0	0.618513	0.853	0.598	0	4	Crispld2
	0	0.611927	0.865	0.591	0	4	Ace
	0	0.61151	0.956	0.807	0	4	Islr
	0	0.602567	0.963	0.715	0	4	Prelp
	0	0.601097	1	1	0	4	S100a6
	0	0.598103	0.99	0.868	0	4	Cygb
	0	0.597383	0.896	0.648	0	4	Igfbp6
	0	0.589463	0.871	0.647	0	4	Vcan
	0	0.584202	0.859	0.573	0	4	Ramp2
	0	0.581422	0.902	0.686	0	4	Fxyd5
	0	0.570121	0.938	0.755	0	4	Ifngr1
	0	0.562556	0.778	0.442	0	4	Qpct
	0	0.560975	0.39	0.11	0	4	Pgf
	0	0.560273	0.939	0.76	0	4	Aldh2
	0	0.542365	0.864	0.603	0	4	Lama2
	0	0.541072	0.819	0.505	0	4	Ms4a4d
	0	0.531246	0.981	0.872	0	4	Ahnak
	0	0.511959	1	1	0	4	Dcn
	0	0.50264	0.99	0.909	0	4	Sptbn1
	0	0.496393	0.978	0.876	0	4	Tcf4
	0	0.480536	0.397	0.069	0	4	Hmcn2
	0	0.469982	0.478	0.121	0	4	Col4a4
	0	0.465381	0.995	0.898	0	4	Rarres2
	0	0.463911	0.972	0.872	0	4	Aes
	0	0.462242	0.377	0.095	0	4	Scara5
	0	0.453438	1	0.991	0	4	Tuba1a
	0	0.45226	0.991	0.925	0	4	Sdc2
	0	0.443005	1	1	0	4	Anxa5
	0	0.430992	0.995	0.929	0	4	Zbtb20
	0	0.416744	1	0.979	0	4	Rhoa
	0	0.413026	0.999	0.98	0	4	Tspo
	0	0.377343	1	0.999	0	4	mt-Nd1
	0	0.261013	0.259	0.046	0	4	Col4a3
	2.628e-306	0.464833	0.995	0.938	4.72593e-302	4	S100a16
	4.7282e-301	0.533394	0.863	0.647	8.50271e-297	4	Fhl1
	1.11143e-295	0.27628	0.269	0.058	1.99868e-291	4	1700019D03Rik
	5.08662e-293	0.370826	0.397	0.125	9.14726e-289	4	Lims2
	4.1149e-290	0.714562	0.822	0.609	7.39982e-286	4	Nbl1
	4.9067e-290	0.366867	0.416	0.137	8.82372e-286	4	Scml4
	3.54824e-289	0.415008	0.988	0.886	6.38079e-285	4	Fxyd1
	4.17565e-287	0.453434	0.932	0.737	7.50907e-283	4	Slc43a3
	3.39558e-285	0.510836	0.881	0.704	6.10628e-281	4	Dpysl2
	2.28447e-280	0.388425	0.47	0.176	4.10816e-276	4	Ablim1
	5.16554e-279	0.429027	0.988	0.931	9.28918e-275	4	Serpinb6a
	1.52142e-277	0.354137	0.328	0.089	2.73597e-273	4	Gsta3
	4.34293e-276	0.34493	0.998	0.973	7.80988e-272	4	Cyb5a
	1.33238e-275	0.355699	0.417	0.142	2.39601e-271	4	Abca8b
	5.13807e-272	0.379497	0.991	0.93	9.23979e-268	4	Rnase4
	2.05661e-271	0.471407	0.483	0.184	3.6984e-267	4	6030408B16Rik
	1.07686e-270	0.405605	1	0.989	1.93651e-266	4	Emp3
	3.9101e-267	0.251633	1	0.999	7.03153e-263	4	Itm2b
	4.65834e-265	0.356899	0.447	0.165	8.3771e-261	4	Cmklr1
	1.46678e-264	0.41262	0.94	0.838	2.63772e-260	4	Rap1a
	5.40908e-264	0.608404	0.404	0.141	9.72715e-260	4	Hsd11b1
	2.11689e-258	0.501515	0.68	0.398	3.8068e-254	4	Jup
	6.26932e-257	0.351576	1	0.998	1.12741e-252	4	Pcolce
	7.69714e-254	0.445249	0.975	0.789	1.38418e-249	4	Col15a1
	8.46465e-249	0.433246	0.884	0.633	1.5222e-244	4	Dpep1
	9.63672e-244	0.314358	0.345	0.11	1.73297e-239	4	Abca6
	7.46253e-242	0.409121	0.92	0.769	1.34199e-237	4	Cpq
	2.5776e-237	0.310737	1	0.995	4.63529e-233	4	Arpc1b
	6.44031e-236	0.307139	0.395	0.14	1.15816e-231	4	Plekha6
	5.05745e-232	0.384531	0.968	0.875	9.09481e-228	4	Ddah2
	2.24387e-231	0.386301	0.934	0.8	4.03515e-227	4	Myadm
	4.53791e-228	0.300116	1	0.992	8.16052e-224	4	Fkbp1a
	3.88429e-227	0.412001	0.832	0.626	6.98513e-223	4	Lpar1
	1.14092e-225	0.359012	0.975	0.889	2.05171e-221	4	Cd47
	5.73535e-225	0.31727	0.984	0.881	1.03139e-220	4	Oaf
	1.79318e-221	0.549382	0.685	0.414	3.22467e-217	4	G0s2
	7.02185e-221	0.422203	0.551	0.271	1.26274e-216	4	Bmp4
	2.04074e-218	0.37943	0.998	0.99	3.66987e-214	4	Fbln2
	1.30668e-217	0.37573	0.965	0.853	2.3498e-213	4	Lrp1
	2.75032e-213	0.328246	0.999	0.988	4.9459e-209	4	mt-Nd2
	7.39995e-213	0.448799	0.885	0.665	1.33073e-208	4	Plpp3
	3.87571e-209	0.333045	0.977	0.882	6.9697e-205	4	Cd302
	9.57041e-209	0.358228	0.967	0.904	1.72105e-204	4	S100a13
	1.01885e-208	0.535792	0.703	0.452	1.8322e-204	4	Cd55
	3.09307e-206	0.606204	0.483	0.228	5.56227e-202	4	Ly6c1
	2.92995e-201	0.678097	0.36	0.138	5.26892e-197	4	Tmem100
	6.13346e-201	0.377375	0.941	0.854	1.10298e-196	4	Nfic
	8.67885e-198	0.359863	0.343	0.124	1.56072e-193	4	Lrrn4cl
	1.82522e-194	0.402039	0.565	0.315	3.28229e-190	4	Rgmb
	7.55939e-193	0.266099	0.334	0.119	1.3594e-188	4	Prex2
	2.59264e-192	0.262518	0.304	0.102	4.66234e-188	4	D630003M21Rik
	1.01385e-191	0.416377	0.452	0.213	1.8232e-187	4	Zfp385a
	5.8376e-189	0.410721	0.646	0.4	1.04978e-184	4	Tsc22d3
	1.07302e-186	0.382181	0.49	0.243	1.92961e-182	4	Tmem204
	1.72356e-183	0.390305	0.665	0.433	3.09948e-179	4	Rora
	1.83599e-182	0.416869	0.642	0.408	3.30165e-178	4	Cdc42ep2
	4.88906e-182	0.347467	0.969	0.876	8.792e-178	4	Nid1
	1.427e-181	0.358763	0.936	0.803	2.56618e-177	4	Capg
	4.20407e-181	0.413631	0.799	0.632	7.56017e-177	4	Medag
	5.39745e-180	0.329337	0.998	0.967	9.70624e-176	4	Col6a2
	2.09837e-177	0.367166	0.958	0.885	3.77349e-173	4	Hspg2
	6.56502e-175	0.412124	0.32	0.121	1.18059e-170	4	Sema3c
	1.31593e-174	0.306659	1	0.975	2.36643e-170	4	Anxa1
	2.76068e-174	0.261928	1	0.996	4.96453e-170	4	mt-Nd4
	7.56352e-168	0.410925	0.62	0.394	1.36015e-163	4	Bhlhe40
	3.75925e-166	0.30363	0.278	0.096	6.76025e-162	4	Hs3st1
	1.47021e-165	0.293405	0.998	0.985	2.64389e-161	4	Jund
	3.15922e-165	0.27514	0.287	0.1	5.68122e-161	4	Emilin2
	7.80077e-163	0.461524	0.578	0.356	1.40281e-158	4	Ppp1r14a
	6.41744e-162	0.271522	1	0.98	1.15405e-157	4	Col6a1
	1.59273e-160	0.361593	1	0.978	2.8642e-156	4	Mfap5
	8.54562e-160	0.38968	0.672	0.462	1.53676e-155	4	Akap12
	1.8639e-159	0.291078	0.983	0.941	3.35185e-155	4	Smim14
	6.03362e-157	0.384728	0.531	0.3	1.08503e-152	4	Creb5
	7.36043e-156	0.285386	0.415	0.196	1.32363e-151	4	Slco3a1
	1.67306e-154	0.327181	0.804	0.64	3.00866e-150	4	Ppp1r2
	2.57784e-154	0.26906	0.99	0.925	4.63574e-150	4	Igfbp4
	1.85274e-153	0.420027	0.842	0.738	3.33179e-149	4	Lamb1
	3.27026e-151	0.369238	0.631	0.431	5.88091e-147	4	Ubl3
	3.09694e-149	0.31302	0.535	0.308	5.56923e-145	4	Fyn
	1.49515e-147	0.421258	0.887	0.717	2.68873e-143	4	Meox1
	3.10361e-147	0.366779	0.942	0.839	5.58123e-143	4	Cfh
	3.41583e-147	0.315988	0.546	0.312	6.14269e-143	4	1500009L16Rik
	6.35829e-147	0.273748	0.986	0.935	1.14341e-142	4	Ptgis
	3.12091e-145	0.38951	0.838	0.714	5.61234e-141	4	Ppp1r14b
	2.9841e-144	0.300123	0.774	0.6	5.3663e-140	4	Cd151
	5.94554e-144	0.287266	0.887	0.777	1.06919e-139	4	Degs1
	9.87966e-142	0.262064	0.999	0.98	1.77666e-137	4	Tagln2
	2.62483e-140	0.367583	0.815	0.699	4.72024e-136	4	Ptp4a1
	3.39999e-139	0.329017	0.86	0.697	6.1142e-135	4	Loxl2
	1.18492e-137	0.393758	0.931	0.827	2.13084e-133	4	Ebf1
	1.82323e-137	0.25881	0.341	0.147	3.27871e-133	4	Nrxn2
	4.66678e-137	0.409093	0.737	0.571	8.39228e-133	4	Angptl2
	4.95619e-133	0.345451	0.697	0.531	8.91272e-129	4	Zeb1
	9.14345e-130	0.314255	0.528	0.309	1.64427e-125	4	Gas7
	9.15133e-129	0.340726	0.804	0.666	1.64568e-124	4	Rhob
	9.49654e-129	0.316469	0.809	0.709	1.70776e-124	4	Cltb
	8.25049e-128	0.325123	0.771	0.639	1.48369e-123	4	Ybx3
	3.2468e-127	0.312102	0.625	0.406	5.83872e-123	4	Itih5
	1.20278e-126	0.344799	0.747	0.616	2.16296e-122	4	Carhsp1
	8.83878e-125	0.316204	0.766	0.629	1.58948e-120	4	Tpst1
	8.71929e-123	0.344871	0.729	0.578	1.56799e-118	4	Eng
	7.41734e-122	0.299633	0.853	0.674	1.33386e-117	4	Tcf21
	5.77966e-121	0.270855	0.895	0.801	1.03936e-116	4	Tprgl
	9.52758e-120	0.311265	0.79	0.638	1.71334e-115	4	Nav1
	4.72955e-119	0.295904	0.838	0.726	8.50515e-115	4	Vat1
	3.37043e-118	0.302473	0.339	0.158	6.06104e-114	4	Thbd
	5.21834e-118	0.281284	0.991	0.921	9.38413e-114	4	Pam
	1.79883e-117	0.325244	0.48	0.291	3.23483e-113	4	Gm14005
	5.19143e-117	0.298343	0.511	0.311	9.33575e-113	4	Nr1d1
	5.45751e-116	0.276402	0.904	0.793	9.81423e-112	4	Rhoj
	3.98513e-112	0.323046	0.876	0.742	7.16646e-108	4	Fibin
	1.97955e-111	0.275413	0.742	0.589	3.55982e-107	4	Pdgfra
	1.77176e-110	0.310828	0.75	0.63	3.18615e-106	4	Ccnd3
	4.76211e-110	0.270759	0.854	0.689	8.56369e-106	4	Ier2
	2.60348e-109	0.267254	0.882	0.774	4.68183e-105	4	Gng11
	4.60566e-109	0.3067	0.734	0.56	8.28235e-105	4	Cp
	1.67537e-108	0.390126	0.565	0.388	3.01281e-104	4	Atf5
	3.83275e-108	0.316273	0.279	0.126	6.89244e-104	4	Htra4
	6.11148e-108	0.263665	0.836	0.723	1.09903e-103	4	Ehd2
	2.06557e-105	0.42665	0.938	0.823	3.71452e-101	4	Klf2
	6.49494e-104	0.557464	0.61	0.481	1.16799e-99	4	Cd248
	3.74805e-103	0.254723	0.847	0.74	6.74011e-99	4	Bcl7c
	3.81016e-103	0.333395	0.676	0.522	6.85181e-99	4	Spry1
	7.72601e-103	0.278369	0.462	0.277	1.38937e-98	4	Fam20c
	2.42962e-102	0.305587	0.403	0.219	4.36918e-98	4	Apod
	3.57695e-102	0.261151	0.414	0.228	6.43242e-98	4	Lbp
	9.63649e-102	0.302218	0.782	0.677	1.73293e-97	4	Lama4
	2.75209e-98	0.286247	0.553	0.378	4.94907e-94	4	Tmbim1
	1.46053e-97	0.42841	0.507	0.333	2.62647e-93	4	Dbp
	7.06448e-97	0.295988	0.515	0.335	1.27041e-92	4	Col5a3
	8.1969e-97	0.360333	0.685	0.514	1.47405e-92	4	Adamtsl2
	1.27068e-96	0.281467	0.526	0.354	2.28507e-92	4	Pqlc3
	2.90263e-93	0.267008	0.796	0.687	5.2198e-89	4	Slc29a1
	4.24632e-93	0.301451	0.745	0.632	7.63615e-89	4	Mat2a
	3.10108e-92	0.252369	0.94	0.846	5.57668e-88	4	Jun
	3.25602e-89	0.261545	0.566	0.387	5.85529e-85	4	Ar
	7.52867e-89	0.281002	0.99	0.975	1.35388e-84	4	Ecm1
	1.83142e-87	0.306346	0.743	0.631	3.29345e-83	4	Aldh1a1
	3.51808e-87	0.278843	0.675	0.558	6.32656e-83	4	Tmod3
	1.48381e-83	0.257276	0.749	0.659	2.66833e-79	4	Tusc3
	2.21641e-82	0.301627	0.733	0.628	3.98577e-78	4	F2r
	7.94659e-81	0.262045	0.821	0.752	1.42904e-76	4	Dbn1
	3.16209e-78	0.27994	0.737	0.618	5.68639e-74	4	Plat
	5.87974e-77	0.478508	0.501	0.356	1.05735e-72	4	Cst6
	2.36043e-74	0.303694	0.603	0.481	4.24477e-70	4	Tmem64
	2.70898e-67	0.26793	0.677	0.584	4.87156e-63	4	Klf3
	9.82482e-66	0.312842	0.549	0.425	1.7668e-61	4	Heyl
	5.33934e-63	0.254195	0.613	0.501	9.60173e-59	4	Arap1
	2.04475e-54	0.321002	0.921	0.885	3.67708e-50	4	Anxa3
	1.97343e-28	0.274598	0.459	0.384	3.54883e-24	4	Thy1
	2.66607e-25	0.310112	0.525	0.479	4.7944e-21	4	Gfpt2
	8.94573e-12	0.254672	0.682	0.697	1.60871e-07	4	Ugdh
	0	1.93938	1	0.994	0	5	Gsn
	0	1.86831	0.999	0.878	0	5	Apoe
	0	1.38893	0.392	0.029	0	5	Inmt
	0	1.36655	0.943	0.47	0	5	Clec3b
	0	1.35452	0.981	0.632	0	5	Dpep1
	0	1.30133	0.977	0.559	0	5	Gstm1
	0	1.29904	0.998	0.837	0	5	Cfh
	0	1.23737	0.994	0.858	0	5	Junb
	0	1.20665	0.995	0.799	0	5	Fos
	0	1.0926	0.994	0.77	0	5	Htra3
	0	1.04502	0.975	0.679	0	5	C3
	0	0.991867	0.881	0.337	0	5	Tnxb
	0	0.974291	1	0.971	0	5	Serping1
	0	0.958194	0.996	0.902	0	5	Fbln1
	0	0.94613	0.958	0.685	0	5	Ier2
	0	0.941276	0.785	0.369	0	5	Glul
	0	0.881699	1	1	0	5	Dcn
	0	0.855714	0.883	0.481	0	5	Abca8a
	0	0.85235	0.966	0.686	0	5	Egr1
	0	0.842201	0.998	0.906	0	5	Selenop
	0	0.794717	0.402	0.045	0	5	Penk
	0	0.785236	0.962	0.682	0	5	Mgst1
	0	0.740734	0.975	0.739	0	5	Slc43a3
	0	0.720507	0.677	0.292	0	5	Atp1a2
	0	0.718823	0.968	0.629	0	5	Sparcl1
	0	0.709803	0.972	0.664	0	5	Plpp3
	0	0.708469	0.999	0.984	0	5	Gpx3
	0	0.692057	0.946	0.67	0	5	Entpd2
	0	0.676831	0.87	0.581	0	5	Ramp2
	0	0.674194	0.998	0.926	0	5	Igfbp4
	0	0.670643	0.813	0.515	0	5	Ms4a4d
	0	0.664536	0.806	0.55	0	5	Klf9
	0	0.654792	1	1	0	5	Fth1
	0	0.651367	0.437	0.098	0	5	Scara5
	0	0.643529	0.441	0.103	0	5	Fmo2
	0	0.637955	1	1	0	5	Itm2b
	0	0.632166	0.839	0.585	0	5	Pdgfra
	0	0.630148	0.437	0.059	0	5	Vit
	0	0.623865	0.998	0.871	0	5	Cygb
	0	0.612003	0.996	0.883	0	5	Cd302
	0	0.595516	0.496	0.127	0	5	Enpp2
	0	0.577242	0.998	0.9	0	5	Rarres2
	0	0.576393	0.999	0.931	0	5	Zbtb20
	0	0.55922	0.996	0.932	0	5	Rnase4
	0	0.554347	0.999	0.936	0	5	Dpt
	0	0.521269	1	0.993	0	5	Ccdc80
	0	0.501529	0.356	0.075	0	5	Ccl19
	0	0.488099	0.37	0.053	0	5	Lsamp
	0	0.484333	0.999	0.973	0	5	Cyb5a
	9.13763e-307	0.67813	0.895	0.602	1.64322e-302	5	Crispld2
	3.95573e-303	0.895317	0.745	0.39	7.1136e-299	5	Btg2
	1.74562e-298	0.4785	0.415	0.122	3.13915e-294	5	Cyp27a1
	4.80151e-290	0.604505	0.815	0.531	8.63455e-286	5	C1ra
	9.73955e-285	0.754793	0.892	0.629	1.75146e-280	5	Lpl
	2.95227e-276	0.310159	0.254	0.047	5.30907e-272	5	Col6a6
	1.11953e-275	0.606021	0.825	0.538	2.01325e-271	5	C1s1
	2.1116e-263	0.596517	0.753	0.462	3.79729e-259	5	Camk2n1
	1.02318e-260	0.795341	0.711	0.42	1.83998e-256	5	G0s2
	5.30301e-256	0.781849	0.906	0.641	9.5364e-252	5	Dusp1
	5.71229e-255	0.461171	0.995	0.888	1.02724e-250	5	Fxyd1
	1.521e-250	0.518616	0.998	0.975	2.73522e-246	5	Ecm1
	6.1089e-248	0.291846	1	1	1.09856e-243	5	Ftl1
	1.75717e-247	0.829064	0.592	0.306	3.15992e-243	5	Fgl2
	1.80064e-247	0.466037	1	0.981	3.23809e-243	5	Lum
	2.23848e-247	0.593735	0.975	0.779	4.02546e-243	5	Gas1
	1.60978e-246	0.556401	0.496	0.192	2.89486e-242	5	6030408B16Rik
	8.07926e-242	0.639165	0.682	0.408	1.45289e-237	5	Selenbp1
	6.58412e-239	0.579612	0.658	0.385	1.18402e-234	5	Ar
	1.64668e-238	0.589345	0.807	0.558	2.96122e-234	5	Cp
	1.04503e-237	0.476979	0.95	0.771	1.87927e-233	5	Cpq
	1.49183e-236	0.499178	0.935	0.766	2.68276e-232	5	Aldh2
	1.25102e-235	0.701017	0.981	0.845	2.2497e-231	5	Jun
	1.02518e-234	0.377007	1	0.999	1.84358e-230	5	mt-Nd1
	1.0585e-230	0.481467	0.924	0.622	1.90351e-226	5	Ly6a
	1.15071e-230	0.381695	0.318	0.088	2.06933e-226	5	Ggt5
	2.19051e-230	0.649461	0.849	0.657	3.9392e-226	5	Srpx
	4.68712e-230	0.650763	0.935	0.71	8.42884e-226	5	Cebpd
	2.81165e-228	0.483808	0.973	0.856	5.05619e-224	5	Lrp1
	4.28567e-225	0.560613	0.253	0.057	7.70691e-221	5	Myoc
	5.94041e-225	0.450798	0.999	0.985	1.06826e-220	5	Jund
	2.45779e-220	0.555186	0.951	0.713	4.41985e-216	5	Smoc2
	6.9241e-218	0.658859	0.528	0.247	1.24516e-213	5	Nr4a1
	3.29444e-217	0.540394	0.462	0.178	5.92439e-213	5	Ackr3
	6.07298e-216	0.442567	0.98	0.876	1.0921e-211	5	Nfib
	4.82955e-209	0.570041	0.859	0.658	8.68497e-205	5	Pcolce2
	1.62546e-208	0.543788	1	0.998	2.92307e-204	5	Mgp
	5.10451e-204	0.55515	0.724	0.404	9.17944e-200	5	Tppp3
	2.21641e-202	0.885669	0.518	0.261	3.98578e-198	5	C4b
	3.01077e-202	0.500659	0.515	0.244	5.41428e-198	5	Spon1
	3.92101e-199	0.704595	0.399	0.149	7.05116e-195	5	Hsd11b1
	6.5926e-198	0.356809	0.297	0.086	1.18555e-193	5	Ifi207
	3.86989e-195	0.309287	0.279	0.077	6.95922e-191	5	Aspa
	5.92085e-193	0.558874	0.773	0.489	1.06475e-188	5	Klf4
	2.21102e-189	0.510756	0.568	0.311	3.97608e-185	5	Pid1
	8.72019e-182	0.686813	0.551	0.3	1.56815e-177	5	Zfp36
	1.89609e-180	0.448566	0.43	0.183	3.40974e-176	5	AW112010
	8.91387e-180	0.488051	0.279	0.083	1.60298e-175	5	Nmb
	1.19609e-175	0.490078	0.757	0.526	2.15093e-171	5	Htra1
	1.6297e-174	0.463984	0.391	0.151	2.93069e-170	5	Efemp1
	5.38145e-174	0.396685	0.306	0.098	9.67747e-170	5	Gsta3
	2.51618e-173	0.481227	0.984	0.877	4.52485e-169	5	Nid1
	4.1656e-169	0.543277	0.672	0.455	7.491e-165	5	Txnip
	4.63824e-169	0.290023	1	0.997	8.34094e-165	5	mt-Nd4
	2.05864e-166	0.385824	0.988	0.83	3.70206e-162	5	Cd34
	9.96216e-165	0.369848	0.988	0.849	1.79149e-160	5	Ltbp4
	1.93e-162	0.359892	0.998	0.936	3.47072e-158	5	Mmp2
	5.95337e-162	0.342013	0.994	0.916	1.07059e-157	5	Fcgrt
	7.63913e-162	0.443841	0.888	0.676	1.37375e-157	5	Tcf21
	8.55341e-162	0.469945	0.984	0.778	1.53816e-157	5	Pi16
	3.62384e-158	0.371906	0.93	0.796	6.51675e-154	5	Celf2
	3.95569e-158	0.459318	0.671	0.462	7.11352e-154	5	Qpct
	6.80594e-153	0.461736	0.626	0.416	1.22391e-148	5	Scn7a
	1.74327e-151	0.583376	0.478	0.26	3.13493e-147	5	Ifi205
	7.26661e-150	0.684009	0.483	0.244	1.30675e-145	5	Cxcl1
	4.85677e-148	0.640648	0.643	0.433	8.73394e-144	5	Phlda1
	2.62203e-146	0.352163	0.954	0.866	4.71519e-142	5	Rsrp1
	5.57146e-146	0.443046	0.485	0.248	1.00191e-141	5	Vwa1
	4.77242e-145	0.337167	0.993	0.894	8.58225e-141	5	Ypel3
	1.08488e-144	0.40321	0.365	0.144	1.95094e-140	5	Tmem100
	4.35753e-144	0.517581	0.606	0.411	7.83615e-140	5	Tsc22d3
	5.77563e-142	0.451581	0.919	0.719	1.03863e-137	5	Cpxm1
	3.53706e-141	0.50645	0.71	0.5	6.36069e-137	5	Adamts5
	1.51139e-138	0.310629	0.99	0.873	2.71794e-134	5	Pmp22
	7.36655e-138	0.347421	0.966	0.831	1.32473e-133	5	Bicc1
	1.47702e-133	0.376827	0.803	0.659	2.65613e-129	5	Pnrc1
	5.45802e-133	0.424601	0.669	0.498	9.81516e-129	5	Gstt1
	1.09191e-130	0.453393	0.259	0.089	1.96358e-126	5	Rbp4
	7.52619e-130	0.373057	0.377	0.172	1.35343e-125	5	Podn
	8.04363e-129	0.364032	0.971	0.81	1.44649e-124	5	Islr
	2.43512e-127	0.386071	0.972	0.845	4.37907e-123	5	Lamc1
	1.04697e-122	0.293627	0.343	0.145	1.88277e-118	5	Col4a4
	2.87128e-122	0.284739	1	0.989	5.16342e-118	5	mt-Nd2
	6.55281e-122	0.254531	0.999	0.993	1.17839e-117	5	Ctsl
	9.73835e-121	0.333868	0.383	0.182	1.75125e-116	5	Xdh
	1.06055e-108	0.357629	0.301	0.127	1.90719e-104	5	Pgf
	9.45545e-106	0.333112	0.788	0.63	1.70037e-101	5	Aldh1a1
	1.20881e-104	0.387623	0.91	0.741	2.1738e-100	5	Cebpb
	2.62312e-101	0.285683	0.287	0.122	4.71715e-97	5	Abca6
	5.72925e-101	0.279768	0.991	0.932	1.03029e-96	5	Serpinb6a
	7.38177e-101	0.338697	0.377	0.193	1.32746e-96	5	Ablim1
	6.00817e-100	0.271474	0.296	0.129	1.08045e-95	5	Prex2
	2.75595e-99	0.425587	0.475	0.298	4.95603e-95	5	Ngf
	3.80228e-99	0.285217	0.988	0.892	6.83763e-95	5	Mt1
	5.65975e-99	0.305927	0.317	0.149	1.01779e-94	5	Flt3l
	9.20794e-99	0.30092	0.285	0.122	1.65586e-94	5	Steap4
	7.82097e-97	0.277208	0.945	0.836	1.40644e-92	5	Nop53
	2.76621e-96	0.544282	0.547	0.401	4.97448e-92	5	Fosb
	3.63119e-96	0.455898	0.987	0.861	6.52997e-92	5	Igf1
	2.73872e-94	0.33278	0.714	0.57	4.92504e-90	5	Smpdl3a
	9.82356e-94	0.571797	0.934	0.761	1.76657e-89	5	Gas6
	1.29287e-93	0.252919	0.99	0.912	2.32497e-89	5	Sptbn1
	2.92166e-93	0.349941	0.643	0.461	5.25402e-89	5	Serpina3n
	3.70419e-93	0.337524	0.98	0.902	6.66125e-89	5	Il11ra1
	1.46115e-91	0.544448	0.78	0.626	2.62759e-87	5	Id2
	4.04389e-91	0.297961	0.419	0.234	7.27213e-87	5	Tshz2
	1.73168e-90	0.323295	0.741	0.647	3.11408e-86	5	Slc1a5
	6.51282e-86	0.260887	0.945	0.811	1.1712e-81	5	Nfia
	3.90027e-85	0.340702	0.714	0.613	7.01386e-81	5	Ndrg2
	8.83162e-85	0.274926	0.924	0.775	1.58819e-80	5	Sat1
	8.20595e-84	0.300987	0.763	0.608	1.47568e-79	5	Ace
	2.84218e-83	0.371403	0.39	0.226	5.11109e-79	5	Gem
	1.45664e-81	0.541041	0.371	0.209	2.61948e-77	5	Adm
	3.03701e-81	0.285368	0.363	0.201	5.46145e-77	5	Tgfbr3
	3.57197e-81	0.290593	0.753	0.621	6.42347e-77	5	Lama2
	6.60586e-80	0.319682	0.4	0.235	1.18793e-75	5	Lbp
	8.83791e-80	0.314693	0.714	0.638	1.58932e-75	5	Tpst1
	2.83866e-76	0.305342	0.854	0.657	5.10476e-72	5	Cxcl12
	1.19748e-75	0.294545	0.743	0.651	2.15343e-71	5	Ppp1r2
	2.77175e-75	0.879053	0.256	0.122	4.98444e-71	5	Igfbp3
	3.24523e-75	0.390335	0.383	0.226	5.83589e-71	5	F3
	8.19604e-75	0.40082	0.525	0.41	1.47389e-70	5	Slc16a2
	1.19715e-73	0.353548	0.529	0.401	2.15283e-69	5	Zfp36l2
	1.30734e-72	0.26196	0.916	0.795	2.351e-68	5	Rhoj
	4.06334e-72	0.258376	0.993	0.931	7.30711e-68	5	Olfml3
	1.85411e-70	0.272519	0.532	0.373	3.33424e-66	5	Osr1
	2.0376e-63	0.252592	0.448	0.291	3.66421e-59	5	Cdkn1c
	1.15682e-61	0.279963	0.626	0.49	2.08031e-57	5	Trf
	2.30819e-60	0.353571	0.426	0.295	4.15081e-56	5	Kazald1
	9.46709e-58	0.330773	0.474	0.363	1.70247e-53	5	Por
	7.98459e-56	0.261462	0.685	0.618	1.43587e-51	5	Herpud1
	6.23379e-55	0.251855	0.765	0.663	1.12102e-50	5	Fhl1
	1.04327e-54	0.252201	0.256	0.137	1.87611e-50	5	S1pr3
	2.16908e-53	0.267449	0.324	0.196	3.90066e-49	5	2004-09-01
	3.71059e-51	0.253158	0.645	0.609	6.67276e-47	5	Dhrs7
	4.83631e-51	0.346814	0.766	0.641	8.69713e-47	5	Hes1
	4.94469e-50	0.284444	0.535	0.46	8.89203e-46	5	Tnfsf12
	1.78733e-47	0.286515	0.445	0.344	3.21416e-43	5	Man1a
	2.7978e-47	0.370169	0.461	0.343	5.03129e-43	5	Dbp
	4.56751e-44	0.325709	0.497	0.4	8.21375e-40	5	Pcsk6
	8.76251e-44	0.290856	0.964	0.824	1.57576e-39	5	Klf2
	2.03937e-42	0.264651	0.593	0.546	3.6674e-38	5	Zeb1
	5.78721e-42	0.275631	0.775	0.727	1.04071e-37	5	Gstm5
	1.40914e-39	0.252627	0.52	0.447	2.53406e-35	5	Pink1
	2.11375e-38	1.17136	0.291	0.199	3.80116e-34	5	Cxcl14
	2.73206e-34	0.319467	0.376	0.295	4.91306e-30	5	Ppp1r15a
	1.55674e-32	0.337137	0.272	0.18	2.79949e-28	5	Tst
	1.20077e-31	0.383693	0.42	0.345	2.15934e-27	5	Socs3
	1.24469e-20	0.280234	0.309	0.233	2.23833e-16	5	Apod
	5.50932e-16	0.286017	0.297	0.242	9.9074e-12	5	Adamts1
	0	3.55466	0.818	0.211	0	6	Saa3
	0	3.06779	0.993	0.348	0	6	Clu
	0	2.94382	0.899	0.112	0	6	Lgals7
	0	2.89311	0.875	0.098	0	6	Dmkn
	0	2.67726	0.692	0.077	0	6	Msln
	0	2.63539	0.916	0.059	0	6	Nkain4
	0	2.62053	0.718	0.066	0	6	Krt19
	0	2.55259	0.731	0.047	0	6	Upk3b
	0	2.07055	0.685	0.034	0	6	Upk1b
	0	1.97907	0.939	0.09	0	6	Slc9a3r1
	0	1.85744	0.86	0.173	0	6	Ezr
	0	1.8416	0.921	0.478	0	6	Trf
	0	1.83499	0.589	0.04	0	6	Slpi
	0	1.81856	0.974	0.265	0	6	Gm12840
	0	1.79747	0.81	0.022	0	6	Gpm6a
	0	1.75726	0.988	0.744	0	6	Hspb1
	0	1.73293	0.583	0.019	0	6	Krt8
	0	1.6917	0.468	0.025	0	6	Krt7
	0	1.66117	0.993	0.538	0	6	S100a1
	0	1.62969	0.955	0.689	0	6	C3
	0	1.62011	0.966	0.888	0	6	H2-K1
	0	1.60063	0.552	0.015	0	6	Krt18
	0	1.55024	0.886	0.367	0	6	Spon2
	0	1.54745	0.937	0.66	0	6	Igfbp6
	0	1.53932	0.774	0.009	0	6	Lrrn4
	0	1.51763	0.908	0.05	0	6	Ptgs1
	0	1.43157	0.952	0.047	0	6	Wt1
	0	1.41412	0.683	0.142	0	6	Efemp1
	0	1.41078	0.85	0.16	0	6	Atp1b1
	0	1.39279	0.741	0.04	0	6	Rspo1
	0	1.39024	0.647	0.062	0	6	Cldn15
	0	1.37353	0.969	0.69	0	6	Mgst1
	0	1.37036	0.808	0.039	0	6	Wnt4
	0	1.34544	0.818	0.132	0	6	Sbsn
	0	1.30783	0.82	0.015	0	6	Cxadr
	0	1.30401	0.859	0.217	0	6	Cav1
	0	1.29362	0.937	0.405	0	6	Arhgdib
	0	1.25179	0.791	0.102	0	6	C2
	0	1.23864	0.459	0.03	0	6	Hpgd
	0	1.22917	0.695	0.087	0	6	H2-Q7
	0	1.22368	0.988	0.873	0	6	Ly6e
	0	1.2206	0.678	0.025	0	6	Smpd3
	0	1.21623	0.581	0.015	0	6	Tesc
	0	1.21405	0.908	0.525	0	6	Smim1
	0	1.20692	0.868	0.487	0	6	Acaa2
	0	1.18301	0.341	0.015	0	6	Myl7
	0	1.17493	1	1	0	6	Fth1
	0	1.17478	0.566	0.011	0	6	Cldn3
	0	1.16548	0.762	0.205	0	6	Serpinb1a
	0	1.15608	0.72	0.134	0	6	Gm20186
	0	1.1523	0.735	0.081	0	6	Serpinb6b
	0	1.13865	0.908	0.391	0	6	Sdc4
	0	1.12743	0.836	0.193	0	6	Flrt2
	0	1.12264	0.696	0.048	0	6	Tmem151a
	0	1.11692	0.667	0.144	0	6	Lgals3
	0	1.10896	0.8	0.174	0	6	Tgm2
	0	1.10048	0.998	0.844	0	6	Tmem176b
	0	1.09145	0.847	0.32	0	6	Ldhb
	0	1.07736	0.716	0.075	0	6	Aplp1
	0	1.06685	0.884	0.23	0	6	Isyna1
	0	1.06518	0.887	0.355	0	6	Irf7
	0	1.06273	0.647	0.045	0	6	Spint2
	0	1.06253	0.63	0.009	0	6	Pkhd1l1
	0	1.05923	0.543	0.086	0	6	Aqp1
	0	1.05548	0.73	0.046	0	6	Frmd4b
	0	1.05124	0.643	0.021	0	6	Esam
	0	1.0504	0.629	0.01	0	6	Lsr
	0	1.04884	0.768	0.085	0	6	Gjb5
	0	1.04346	0.763	0.022	0	6	F11r
	0	1.03762	0.702	0.15	0	6	Ucp2
	0	1.03416	0.908	0.542	0	6	C1s1
	0	1.03222	0.688	0.085	0	6	Cfb
	0	1.02451	0.916	0.342	0	6	Mpp6
	0	1.02062	0.988	0.672	0	6	Tmem176a
	0	1.01045	0.768	0.059	0	6	Maf
	0	1.00817	0.479	0.038	0	6	Has1
	0	1.00771	0.805	0.166	0	6	Rpp25
	0	1.00075	0.863	0.341	0	6	Oasl2
	0	0.964681	0.984	0.742	0	6	Cebpb
	0	0.963634	0.258	0.008	0	6	Krt14
	0	0.960065	0.688	0.143	0	6	Gpc3
	0	0.954862	0.999	1	0	6	B2m
	0	0.943829	0.501	0.123	0	6	Bcam
	0	0.938024	0.405	0.028	0	6	Chil1
	0	0.937916	0.894	0.524	0	6	Pdpn
	0	0.932312	0.812	0.343	0	6	Ncoa4
	0	0.931978	0.807	0.322	0	6	Cd2ap
	0	0.911164	0.953	0.719	0	6	Tsc22d1
	0	0.905559	0.772	0.052	0	6	Myrf
	0	0.9044	0.897	0.604	0	6	Cd151
	0	0.903135	0.999	0.938	0	6	Ptgis
	0	0.895105	0.641	0.219	0	6	Cavin2
	0	0.89169	0.777	0.276	0	6	Gbp2
	0	0.890685	0.849	0.233	0	6	Ifi204
	0	0.88726	0.378	0.013	0	6	Gng13
	0	0.886673	0.9	0.431	0	6	Rbpms
	0	0.880411	0.498	0.042	0	6	Anxa8
	0	0.879899	0.851	0.217	0	6	Nectin2
	0	0.876576	0.435	0.018	0	6	Gatm
	0	0.86528	0.504	0.015	0	6	Gsta4
	0	0.863197	0.392	0.022	0	6	Lcn2
	0	0.855353	0.444	0.048	0	6	Slc39a8
	0	0.849635	0.315	0.006	0	6	Tm4sf5
	0	0.848568	0.765	0.238	0	6	Syne2
	0	0.847773	0.881	0.363	0	6	Cdh11
	0	0.84249	0.725	0.151	0	6	Zbp1
	0	0.832056	0.532	0.088	0	6	Abcb1b
	0	0.817909	0.915	0.505	0	6	Psmb8
	0	0.797041	0.465	0.034	0	6	Cldn10
	0	0.787364	0.8	0.34	0	6	Dab2
	0	0.78545	1	0.99	0	6	Npc2
	0	0.77802	0.411	0.017	0	6	Trem2
	0	0.776266	0.549	0.033	0	6	Tmem108
	0	0.768354	0.688	0.144	0	6	Cd82
	0	0.766409	0.662	0.03	0	6	Slc38a1
	0	0.764165	0.75	0.194	0	6	Adgrd1
	0	0.761039	0.674	0.108	0	6	Mapkapk3
	0	0.751846	0.5	0.04	0	6	Tinagl1
	0	0.749928	0.59	0.094	0	6	Folr1
	0	0.749565	0.959	0.697	0	6	Psme1
	0	0.748151	0.587	0.041	0	6	Il18
	0	0.741763	0.832	0.352	0	6	Aldh1a2
	0	0.741293	0.416	0.019	0	6	Prr15
	0	0.73489	0.702	0.094	0	6	Ildr2
	0	0.733298	0.78	0.344	0	6	Arhgap29
	0	0.731352	0.794	0.313	0	6	Gsr
	0	0.727049	0.669	0.169	0	6	Gda
	0	0.725959	0.738	0.214	0	6	Acp5
	0	0.717931	0.635	0.091	0	6	Bicd1
	0	0.717535	0.918	0.546	0	6	Gata6
	0	0.71678	0.464	0.102	0	6	Wfdc1
	0	0.71169	0.707	0.12	0	6	Pdlim4
	0	0.709324	0.41	0.006	0	6	Il18r1
	0	0.692418	0.383	0.005	0	6	Muc16
	0	0.686273	0.697	0.194	0	6	Slit3
	0	0.682159	0.647	0.194	0	6	Kiz
	0	0.680445	0.614	0.03	0	6	Stk26
	0	0.667752	0.654	0.082	0	6	Fcor
	0	0.66751	0.846	0.348	0	6	Plscr1
	0	0.664925	0.378	0.005	0	6	Tspan8
	0	0.664061	0.603	0.183	0	6	Gja1
	0	0.659923	0.639	0.13	0	6	Apol9a
	0	0.653431	0.653	0.199	0	6	Hspb8
	0	0.651977	0.639	0.02	0	6	Stxbp2
	0	0.650776	0.506	0.006	0	6	Nfe2l3
	0	0.649701	1	0.999	0	6	Ifitm3
	0	0.646109	0.69	0.223	0	6	Rpap3
	0	0.644764	0.589	0.179	0	6	Daglb
	0	0.638596	0.847	0.368	0	6	Meis2
	0	0.634282	0.556	0.059	0	6	Celf4
	0	0.633875	0.336	0.022	0	6	Aqp5
	0	0.63369	0.477	0.017	0	6	Gjb3
	0	0.632646	0.675	0.205	0	6	Cpz
	0	0.63115	0.487	0.021	0	6	Arl4d
	0	0.626534	0.612	0.165	0	6	Rbbp8
	0	0.620055	0.622	0.163	0	6	Tst
	0	0.617076	0.708	0.178	0	6	Skap2
	0	0.609092	0.462	0.012	0	6	Cyp2s1
	0	0.602561	0.731	0.262	0	6	Ptprf
	0	0.595408	0.437	0.032	0	6	Dpp4
	0	0.584126	0.511	0.123	0	6	Sema3c
	0	0.574998	0.418	0.017	0	6	H2-Q6
	0	0.571357	0.505	0.121	0	6	Rdh10
	0	0.570246	0.422	0.017	0	6	Cela1
	0	0.569336	0.641	0.177	0	6	Ddr1
	0	0.568478	0.326	0.005	0	6	Myo5b
	0	0.567922	0.38	0.01	0	6	Hdc
	0	0.558673	0.298	0.005	0	6	Prr15l
	0	0.552802	0.552	0.085	0	6	Ifi44
	0	0.551926	0.607	0.165	0	6	H2-Q4
	0	0.547663	0.477	0.03	0	6	Ppl
	0	0.543205	0.477	0.005	0	6	Bnc1
	0	0.539018	0.472	0.031	0	6	Tmem37
	0	0.538082	0.554	0.115	0	6	Ifi47
	0	0.53393	0.371	0.017	0	6	Slco2a1
	0	0.532058	0.511	0.107	0	6	Wnt5a
	0	0.526569	0.319	0.046	0	6	Atf3
	0	0.526456	0.404	0.017	0	6	Palmd
	0	0.525686	0.478	0.1	0	6	1190002N15Rik
	0	0.525075	0.42	0.026	0	6	Egln3
	0	0.523861	0.306	0.005	0	6	Lgals2
	0	0.523369	0.513	0.097	0	6	Usp53
	0	0.520751	0.413	0.067	0	6	Slc16a1
	0	0.52025	0.519	0.056	0	6	Il18bp
	0	0.517907	0.537	0.119	0	6	Plxna4
	0	0.512693	0.521	0.129	0	6	Cryl1
	0	0.511847	0.424	0.037	0	6	Net1
	0	0.511378	0.391	0.025	0	6	Hoxa5
	0	0.509447	0.457	0.044	0	6	Slc4a4
	0	0.507896	0.604	0.176	0	6	Xdh
	0	0.505859	0.462	0.079	0	6	Arhgap18
	0	0.504629	0.578	0.161	0	6	Acsl4
	0	0.501457	0.487	0.079	0	6	Slfn2
	0	0.499719	0.454	0.003	0	6	Gata5
	0	0.49884	0.516	0.09	0	6	Apol9b
	0	0.495787	0.303	0.022	0	6	Fgf1
	0	0.49458	0.556	0.125	0	6	Ces2g
	0	0.488587	0.378	0.004	0	6	6820408C15Rik
	0	0.488108	0.542	0.116	0	6	Tspan5
	0	0.484255	0.407	0.031	0	6	Tpbgl
	0	0.484127	0.407	0.012	0	6	Parvb
	0	0.484026	0.412	0.028	0	6	Adam33
	0	0.483637	0.521	0.096	0	6	Adamtsl1
	0	0.483315	0.35	0.02	0	6	Prss12
	0	0.480082	0.445	0.007	0	6	Mbp
	0	0.478577	0.328	0.025	0	6	Npl
	0	0.47731	0.454	0.033	0	6	Cracr2b
	0	0.475552	0.44	0.055	0	6	Rtn1
	0	0.474679	0.493	0.116	0	6	Steap4
	0	0.47343	0.423	0.059	0	6	Espn
	0	0.465344	0.378	0.01	0	6	Fras1
	0	0.463199	0.407	0.019	0	6	Nxnl2
	0	0.462657	0.336	0.005	0	6	Rnf128
	0	0.452879	0.298	0.018	0	6	Col6a5
	0	0.452135	0.284	0.007	0	6	Shisa8
	0	0.445316	0.388	0.039	0	6	Tuba4a
	0	0.444585	0.414	0.048	0	6	Fam213a
	0	0.437053	0.494	0.101	0	6	Cmbl
	0	0.437002	0.357	0.03	0	6	Csf1r
	0	0.436837	0.396	0.006	0	6	Sytl1
	0	0.431022	0.341	0.009	0	6	Mapk13
	0	0.426543	0.503	0.1	0	6	Zfp395
	0	0.425722	0.458	0.03	0	6	2310030G06Rik
	0	0.423147	0.357	0.003	0	6	Il17re
	0	0.420454	0.345	0.003	0	6	Ano1
	0	0.419072	0.425	0.055	0	6	Npr1
	0	0.41806	0.368	0.004	0	6	Fam110c
	0	0.411633	0.309	0.007	0	6	Ptger3
	0	0.410907	0.305	0.025	0	6	Tspan13
	0	0.409138	0.538	0.131	0	6	Zdhhc12
	0	0.407736	0.379	0.025	0	6	Dusp5
	0	0.402387	0.304	0.026	0	6	Nrgn
	0	0.400892	0.442	0.068	0	6	Plekhb2
	0	0.395575	0.404	0.038	0	6	Cobll1
	0	0.39537	0.415	0.027	0	6	Arap2
	0	0.395212	0.44	0.045	0	6	Ptpn13
	0	0.395089	0.448	0.055	0	6	Ptk2b
	0	0.394623	0.369	0.015	0	6	Tnfsf13os
	0	0.388955	0.327	0.003	0	6	Zdbf2
	0	0.387028	0.373	0.006	0	6	Rab11fip1
	0	0.384297	0.372	0.043	0	6	Tmeff2
	0	0.381735	0.426	0.048	0	6	Khk
	0	0.378545	0.397	0.076	0	6	AI661453
	0	0.37337	0.306	0.002	0	6	Slc6a4
	0	0.367816	0.286	0.01	0	6	Tspan15
	0	0.36772	0.415	0.072	0	6	Ociad2
	0	0.364661	0.33	0.005	0	6	Rbm47
	0	0.358308	0.4	0.069	0	6	Enpp5
	0	0.35693	0.378	0.029	0	6	Baiap2l1
	0	0.355359	0.413	0.08	0	6	Ddx60
	0	0.353492	0.253	0.017	0	6	Crym
	0	0.353387	0.409	0.056	0	6	Tmc4
	0	0.350833	0.437	0.081	0	6	Oas1a
	0	0.350744	0.365	0.043	0	6	Mtss1
	0	0.349083	0.367	0.03	0	6	Prkcz
	0	0.347536	0.3	0.036	0	6	Chchd10
	0	0.341585	0.322	0.005	0	6	Cadm4
	0	0.340677	0.354	0.037	0	6	Adamts9
	0	0.334391	0.259	0.009	0	6	Perp
	0	0.331214	0.318	0.006	0	6	Stap2
	0	0.328311	0.351	0.037	0	6	Sdsl
	0	0.328026	0.375	0.059	0	6	Arhgap28
	0	0.327307	0.284	0.031	0	6	Cd14
	0	0.323538	0.383	0.056	0	6	Arhgef5
	0	0.323005	0.304	0.005	0	6	Rhpn2
	0	0.322278	0.354	0.041	0	6	Pnpla7
	0	0.303551	0.318	0.049	0	6	Cgnl1
	0	0.303463	0.314	0.004	0	6	Met
	0	0.303404	0.315	0.039	0	6	Rasl10a
	0	0.301075	0.317	0.031	0	6	Lrrc1
	0	0.298789	0.296	0.026	0	6	Spata13
	0	0.296795	0.304	0.031	0	6	Gcnt2
	0	0.294408	0.326	0.036	0	6	Afap1l2
	0	0.288823	0.347	0.053	0	6	Hotairm1
	0	0.288705	0.293	0.021	0	6	Sox6
	0	0.286444	0.251	0.01	0	6	Gprc5a
	0	0.277852	0.284	0.003	0	6	Crb2
	0	0.276143	0.276	0.019	0	6	Atp6v0e2
	0	0.275945	0.302	0.017	0	6	Sema3f
	0	0.272257	0.303	0.039	0	6	Shtn1
	0	0.267817	0.263	0.022	0	6	Tmem88
	0	0.263222	0.257	0.022	0	6	Pawr
	0	0.256261	0.256	0.004	0	6	Gm13431
	1.05705e-306	1.3014	0.775	0.409	1.90089e-302	6	Laptm4b
	1.21044e-306	0.336905	0.419	0.085	2.17673e-302	6	Enpp4
	1.48403e-306	0.397799	0.505	0.125	2.66874e-302	6	Zbtb7c
	2.6813e-303	0.743698	0.874	0.504	4.82177e-299	6	Syngr2
	1.44483e-301	0.257171	0.266	0.035	2.59824e-297	6	Adam23
	1.80275e-301	0.484732	0.453	0.102	3.24188e-297	6	Emilin2
	2.99832e-297	0.468013	0.515	0.132	5.39187e-293	6	Ttc9
	7.74041e-293	0.430003	0.512	0.137	1.39196e-288	6	Tkfc
	1.72762e-290	0.732481	0.909	0.525	3.10678e-286	6	Htra1
	1.10683e-282	0.655997	0.979	0.795	1.99041e-278	6	Vamp8
	3.81812e-282	0.577538	0.507	0.143	6.86612e-278	6	2200002D01Rik
	6.72136e-279	0.766661	0.463	0.114	1.2087e-274	6	Igfbp3
	2.52674e-276	0.794366	0.657	0.231	4.54384e-272	6	Ifit1
	7.44452e-276	0.500652	0.596	0.19	1.33875e-271	6	Gbp3
	1.21167e-272	0.613609	0.969	0.737	2.17895e-268	6	Gpi1
	2.50574e-272	0.405007	0.303	0.049	4.50608e-268	6	Rsad2
	3.19136e-272	0.612358	0.772	0.359	5.73902e-268	6	Rras2
	3.25903e-271	1.22552	0.975	0.971	5.86072e-267	6	H2-D1
	5.30419e-269	0.426912	0.519	0.149	9.53853e-265	6	Zfp579
	8.09824e-269	0.516333	0.378	0.082	1.45631e-264	6	Sugct
	9.78056e-268	0.865356	0.967	0.892	1.75884e-263	6	Prr13
	3.64484e-265	0.542281	0.732	0.321	6.55452e-261	6	Ilvbl
	3.64267e-263	0.494964	0.563	0.175	6.55061e-259	6	Igtp
	1.90389e-262	0.451702	0.571	0.181	3.42376e-258	6	Tiparp
	7.46735e-262	0.728761	0.777	0.393	1.34285e-257	6	Tmem98
	2.19684e-260	0.539528	0.999	0.974	3.95058e-256	6	Atpif1
	7.58784e-260	0.430834	0.568	0.18	1.36452e-255	6	Gsdme
	5.35239e-258	1.69571	0.486	0.147	9.62521e-254	6	Igfbp5
	8.78874e-258	0.879394	0.809	0.398	1.58048e-253	6	Btg2
	6.06508e-257	0.259487	0.308	0.054	1.09068e-252	6	Map3k1
	1.84193e-256	0.358815	0.413	0.099	3.31235e-252	6	Zcchc3
	4.69638e-255	0.526195	0.998	0.984	8.44551e-251	6	Clic1
	1.18141e-253	0.541392	0.689	0.285	2.12452e-249	6	Efna5
	2.95371e-251	0.47436	0.615	0.212	5.31167e-247	6	Rnf213
	1.13923e-250	0.602745	0.932	0.64	2.04869e-246	6	Atp1a1
	1.78292e-247	0.832902	0.851	0.538	3.20622e-243	6	C1ra
	2.04558e-244	0.565367	0.965	0.741	3.67857e-240	6	Aprt
	4.15653e-244	0.392809	0.462	0.129	7.47468e-240	6	B4galt6
	8.57411e-244	1.22626	0.778	0.439	1.54188e-239	6	Fabp5
	9.40064e-244	0.511592	0.599	0.216	1.69052e-239	6	Psmb9
	5.41949e-242	0.779272	0.916	0.666	9.74586e-238	6	Lgmn
	6.48251e-242	0.820415	0.984	0.944	1.16575e-237	6	S100a10
	1.79207e-240	0.663197	0.666	0.286	3.22268e-236	6	Avpi1
	4.97287e-240	0.570476	0.971	0.834	8.94271e-236	6	Psme2
	1.55788e-239	0.256716	0.303	0.057	2.80154e-235	6	Slc16a4
	1.75742e-239	0.416982	0.453	0.122	3.16037e-235	6	Zfp503
	5.9318e-239	0.461032	0.599	0.214	1.06672e-234	6	Spsb1
	6.79877e-239	0.421929	0.552	0.184	1.22262e-234	6	Pelp1
	1.00731e-238	0.640278	0.77	0.364	1.81144e-234	6	Rtp4
	2.4742e-236	0.54602	0.798	0.386	4.44936e-232	6	Xaf1
	6.57155e-233	0.923187	0.837	0.494	1.18176e-228	6	Ier3
	4.66368e-232	0.308872	0.312	0.063	8.3867e-228	6	Bicdl1
	3.68348e-230	0.348713	0.407	0.1	6.624e-226	6	Hs3st1
	7.39378e-227	0.463146	0.639	0.252	1.32962e-222	6	St3gal1
	1.95662e-223	0.597892	0.873	0.552	3.51859e-219	6	Nfe2l2
	4.1319e-223	0.388446	0.464	0.131	7.4304e-219	6	Lrrn4cl
	7.19037e-223	0.505249	0.484	0.155	1.29304e-218	6	Golm1
	7.6996e-223	0.559812	0.955	0.825	1.38462e-218	6	Anp32a
	6.3324e-222	0.297012	0.279	0.051	1.13875e-217	6	Hmcn1
	9.93018e-222	0.768042	0.859	0.528	1.78574e-217	6	Isg15
	1.49395e-219	0.635868	0.995	0.965	2.68656e-215	6	Cstb
	3.05711e-219	0.340802	0.44	0.124	5.49761e-215	6	Pim3
	5.35256e-219	0.326541	0.416	0.112	9.62552e-215	6	Dnase2a
	1.23731e-218	0.908725	0.284	0.056	2.22506e-214	6	Cd74
	8.62139e-217	0.479145	1	0.991	1.55038e-212	6	Ctsb
	2.72838e-216	0.33841	0.386	0.099	4.90644e-212	6	Eml2
	2.23057e-214	0.466812	0.509	0.171	4.01123e-210	6	Sema3d
	1.73104e-212	0.461924	0.661	0.286	3.11294e-208	6	Fam136a
	2.99679e-211	0.674009	0.797	0.471	5.38912e-207	6	H2-T23
	1.62752e-210	0.614887	0.615	0.26	2.92677e-206	6	Pltp
	2.43685e-209	0.502746	0.87	0.56	4.38219e-205	6	Pigyl
	1.28281e-207	0.442283	0.647	0.275	2.30687e-203	6	Ormdl2
	2.21915e-205	0.872961	0.48	0.159	3.99069e-201	6	Prg4
	2.81828e-205	0.312802	0.435	0.126	5.06811e-201	6	Aldh6a1
	5.6646e-205	0.370072	0.426	0.123	1.01866e-200	6	Steap1
	1.03349e-204	0.40433	0.534	0.185	1.85852e-200	6	Capn6
	5.74142e-204	0.426178	0.475	0.152	1.03248e-199	6	Nrxn2
	2.11601e-200	0.530236	0.725	0.352	3.80521e-196	6	Por
	3.27056e-200	0.440346	0.703	0.324	5.88145e-196	6	Pafah1b3
	3.67139e-200	0.508167	0.752	0.384	6.60227e-196	6	Ube2l6
	1.46566e-199	0.255216	0.333	0.078	2.63569e-195	6	Dusp14
	1.82063e-199	0.514476	0.846	0.507	3.27404e-195	6	Psmb10
	4.30087e-197	0.380289	0.481	0.16	7.73426e-193	6	Mras
	5.90523e-195	0.625825	0.907	0.68	1.06194e-190	6	Cavin1
	6.54391e-195	0.371659	0.453	0.141	1.17679e-190	6	Plaur
	1.56556e-194	0.506411	0.97	0.902	2.81534e-190	6	1810037I17Rik
	2.5855e-192	0.286036	0.322	0.077	4.6495e-188	6	Irf5
	4.97223e-191	0.49083	0.709	0.332	8.94157e-187	6	Stat1
	5.01963e-191	0.599705	0.398	0.118	9.02679e-187	6	Rasl11a
	1.24412e-190	0.549277	0.932	0.757	2.2373e-186	6	P3h4
	7.09681e-190	0.402613	0.619	0.259	1.27622e-185	6	Mitd1
	1.1013e-189	0.294867	0.366	0.097	1.98046e-185	6	Etfbkmt
	1.13078e-189	0.337918	0.47	0.153	2.03349e-185	6	Cdon
	2.7967e-189	0.41715	0.675	0.309	5.0293e-185	6	Il10rb
	4.19073e-188	0.474439	0.99	0.961	7.53619e-184	6	Snrpg
	2.54631e-187	0.338313	0.403	0.115	4.57903e-183	6	Gm4951
	8.59722e-186	1.08125	0.791	0.506	1.54604e-181	6	Cpe
	2.45335e-184	0.502562	0.795	0.462	4.41185e-180	6	Ifnar2
	2.55199e-183	0.415265	0.617	0.265	4.58924e-179	6	Crls1
	1.21169e-182	0.536509	0.998	0.994	2.17899e-178	6	Ctsl
	9.89623e-182	0.40805	1	0.993	1.77964e-177	6	Npm1
	2.0713e-180	0.606486	0.934	0.772	3.72483e-176	6	Jpt1
	5.01426e-179	0.272243	0.273	0.059	9.01714e-175	6	Tcim
	2.97238e-177	0.452785	0.983	0.87	5.34523e-173	6	Bst2
	3.22713e-177	0.312538	0.387	0.114	5.80335e-173	6	Bcl3
	1.09207e-174	0.399211	0.554	0.218	1.96388e-170	6	Gbp7
	1.09567e-174	0.312628	0.392	0.117	1.97035e-170	6	Herc6
	1.2383e-174	0.463176	0.533	0.214	2.22684e-170	6	Naaa
	1.44048e-174	0.441896	0.53	0.197	2.59042e-170	6	Iigp1
	5.27088e-174	0.2907	0.398	0.12	9.47862e-170	6	C1rl
	7.79895e-174	0.387564	0.57	0.234	1.40249e-169	6	Fosl2
	1.0447e-173	0.439927	0.661	0.311	1.87868e-169	6	Efnb1
	7.03746e-172	0.574862	0.762	0.405	1.26555e-167	6	Il33
	1.18687e-170	0.686162	0.668	0.351	2.13434e-166	6	Cotl1
	1.9914e-170	0.263501	0.38	0.111	3.58114e-166	6	Ttll12
	2.44558e-170	0.533848	0.847	0.58	4.39789e-166	6	H2-T22
	3.80306e-170	0.368517	0.41	0.133	6.83905e-166	6	Rab6b
	5.11533e-170	0.373269	0.998	0.999	9.1989e-166	6	Hspa8
	2.10506e-169	0.362936	0.598	0.257	3.78553e-165	6	Gsdmd
	2.6488e-169	1.38987	0.841	0.613	4.76334e-165	6	Mt2
	2.82081e-169	0.385258	0.663	0.32	5.07267e-165	6	Lpcat3
	5.92887e-169	0.454657	0.832	0.545	1.06619e-164	6	Echs1
	6.18776e-169	0.369477	1	1	1.11274e-164	6	Ptma
	8.10569e-169	0.326174	0.469	0.165	1.45765e-164	6	Sap30
	1.66008e-168	0.253663	0.327	0.086	2.98532e-164	6	Gm13056
	7.79994e-168	0.516806	0.955	0.784	1.40266e-163	6	Tpi1
	1.19492e-167	0.262414	0.381	0.113	2.14883e-163	6	Nod1
	1.60209e-167	0.784718	0.702	0.405	2.88104e-163	6	Arhgef12
	6.96902e-167	0.309602	0.45	0.153	1.25324e-162	6	Oxnad1
	8.03292e-167	0.328504	0.516	0.195	1.44456e-162	6	Clcn3
	1.90283e-166	0.579473	0.599	0.265	3.42186e-162	6	C4b
	5.88455e-165	0.401206	0.444	0.156	1.05822e-160	6	Mmd
	1.27742e-163	0.339315	0.541	0.216	2.29718e-159	6	Tfdp2
	2.32401e-163	0.308056	0.462	0.162	4.17927e-159	6	Casp4
	2.14991e-162	0.260708	0.352	0.101	3.86619e-158	6	Aifm2
	2.30894e-162	0.491736	0.735	0.408	4.15217e-158	6	Mndal
	2.43228e-162	0.260633	0.317	0.084	4.37396e-158	6	Csrnp1
	4.05626e-162	0.277201	0.285	0.07	7.29438e-158	6	Eno3
	5.90544e-162	0.505769	0.993	0.953	1.06198e-157	6	Aebp1
	9.09252e-162	0.32325	0.406	0.131	1.63511e-157	6	Acot1
	2.16615e-160	0.699283	0.907	0.825	3.89539e-156	6	Hist1h2bc
	1.89571e-159	0.467312	0.77	0.411	3.40905e-155	6	Stmn1
	3.30947e-159	0.2803	0.454	0.158	5.95142e-155	6	Akr1b10
	1.31882e-158	0.319895	0.497	0.187	2.37163e-154	6	Tlcd2
	2.62905e-158	0.284707	0.389	0.124	4.72783e-154	6	Dtx2
	3.69374e-158	0.316462	0.372	0.113	6.64246e-154	6	Adora2b
	1.21136e-157	0.330528	0.546	0.223	2.17839e-153	6	Eps8
	3.64123e-156	0.45972	0.502	0.204	6.54803e-152	6	Mgll
	2.95104e-155	0.337236	0.554	0.23	5.30685e-151	6	Snta1
	4.77832e-155	0.738739	0.432	0.162	8.59285e-151	6	Cystm1
	1.06621e-154	0.472403	0.445	0.163	1.91736e-150	6	Thbd
	1.3618e-154	0.318954	0.477	0.178	2.44893e-150	6	Flnc
	4.2419e-153	0.432615	0.696	0.371	7.62822e-149	6	Mcub
	7.07544e-153	0.331789	0.5	0.196	1.27238e-148	6	Gpr39
	5.16201e-151	0.405753	0.894	0.636	9.28284e-147	6	Cfl2
	6.61477e-151	0.499101	0.944	0.833	1.18953e-146	6	Lgals3bp
	1.23377e-150	0.593783	0.896	0.798	2.21869e-146	6	Tapbp
	2.30397e-149	0.37049	0.606	0.278	4.14323e-145	6	Rhou
	2.51468e-149	1.21593	0.968	0.896	4.52215e-145	6	Mt1
	4.45803e-149	0.603045	0.622	0.304	8.01687e-145	6	Zfp36
	2.16451e-148	0.298084	0.434	0.155	3.89243e-144	6	Selenoi
	3.90866e-148	0.309321	0.464	0.175	7.02894e-144	6	Zbtb8a
	1.54982e-147	0.31357	0.999	0.982	2.78704e-143	6	Uqcr11
	4.8523e-147	0.439334	0.582	0.253	8.72589e-143	6	Nr4a1
	9.43091e-147	0.347843	0.477	0.182	1.69596e-142	6	Trim30a
	2.61059e-146	0.250598	0.361	0.112	4.69462e-142	6	Irgm2
	2.72171e-146	0.376255	0.698	0.378	4.89445e-142	6	Scamp2
	6.49356e-146	0.263802	0.374	0.12	1.16774e-141	6	Ephb6
	1.17394e-145	0.389809	0.466	0.187	2.1111e-141	6	Slc31a2
	7.02209e-145	0.302504	0.444	0.165	1.26278e-140	6	B4galt4
	1.06892e-144	0.291223	0.432	0.156	1.92224e-140	6	Ggct
	1.45468e-144	0.361844	0.995	0.975	2.61596e-140	6	Psma7
	5.9981e-144	0.656194	0.541	0.266	1.07864e-139	6	Alad
	1.89511e-143	0.636475	0.889	0.724	3.40798e-139	6	Creg1
	2.975e-143	0.388247	0.665	0.347	5.34994e-139	6	Ninj1
	8.29233e-143	0.262331	0.35	0.109	1.49121e-138	6	Pkdcc
	2.82463e-142	0.412542	0.674	0.353	5.07953e-138	6	Phf11d
	2.99895e-142	0.272557	0.441	0.161	5.393e-138	6	Frrs1
	8.0423e-142	0.488104	0.633	0.336	1.44625e-137	6	Man1a
	9.53554e-142	0.338379	0.995	0.959	1.71478e-137	6	Atp5g2
	1.13244e-141	0.341642	0.606	0.289	2.03646e-137	6	Anxa11
	1.37519e-140	0.405538	0.908	0.672	2.473e-136	6	Tnfrsf1a
	2.63026e-140	0.334896	1	0.998	4.73e-136	6	Hsp90ab1
	6.92714e-139	0.474031	0.794	0.516	1.24571e-134	6	Grina
	9.34837e-139	0.316195	0.286	0.078	1.68112e-134	6	Fam180a
	1.17737e-138	0.365368	0.518	0.227	2.11727e-134	6	Tmem238
	9.25915e-137	0.338038	0.516	0.217	1.66507e-132	6	B4galt5
	1.67021e-136	0.440541	0.974	0.92	3.00355e-132	6	Hsp90aa1
	3.61596e-136	0.46028	0.716	0.427	6.50259e-132	6	Slc48a1
	8.61437e-136	0.336724	0.516	0.223	1.54912e-131	6	Meis1
	5.79617e-135	0.40892	0.73	0.429	1.04233e-130	6	Twsg1
	1.82787e-134	0.452423	0.976	0.91	3.28706e-130	6	Cyb5r3
	2.06105e-134	0.42908	0.918	0.756	3.70639e-130	6	Vdac1
	3.33356e-132	0.987968	0.385	0.145	5.99473e-128	6	Enpp2
	4.30028e-132	0.261615	0.371	0.126	7.7332e-128	6	Sema5a
	1.5727e-131	0.341391	0.993	0.958	2.82818e-127	6	Gpx1
	5.76723e-129	0.281467	0.462	0.183	1.03712e-124	6	Parp9
	1.55419e-128	0.262167	0.42	0.158	2.7949e-124	6	Aldh9a1
	1.31494e-127	0.270936	0.413	0.155	2.36467e-123	6	Plekhg3
	2.71328e-127	0.30552	0.494	0.211	4.8793e-123	6	Rnf114
	6.4644e-127	0.422182	0.722	0.438	1.16249e-122	6	Dhrs4
	1.75867e-126	0.34932	0.449	0.183	3.16262e-122	6	Nid2
	1.8041e-126	0.257081	0.296	0.088	3.24431e-122	6	Ptges
	3.30142e-125	0.384364	0.966	0.849	5.93694e-121	6	Ap2s1
	4.0375e-125	0.359843	0.44	0.18	7.26063e-121	6	Cdh3
	4.10295e-125	0.322479	0.349	0.119	7.37833e-121	6	Adgrg2
	5.51715e-125	0.333645	0.478	0.207	9.92149e-121	6	Fah
	1.12533e-124	0.404438	0.72	0.418	2.02368e-120	6	Cdc42ep2
	2.09067e-124	0.259513	0.425	0.164	3.75965e-120	6	Mindy1
	2.67859e-124	0.291418	0.477	0.197	4.81691e-120	6	Samd9l
	1.54359e-123	0.405991	0.687	0.397	2.77583e-119	6	Gm2a
	2.45076e-123	0.416803	0.998	0.995	4.4072e-119	6	Capns1
	1.14005e-122	0.2799	0.998	0.998	2.05014e-118	6	Chchd2
	4.60493e-122	0.367094	0.573	0.272	8.28105e-118	6	Rrm1
	9.90906e-122	0.299167	0.435	0.176	1.78195e-117	6	Tpd52
	1.50075e-121	0.395066	0.815	0.543	2.69881e-117	6	Creb3l1
	2.36209e-120	0.45081	0.754	0.493	4.24775e-116	6	Ppp1r12a
	2.85512e-120	0.426335	0.997	0.99	5.13436e-116	6	Emp3
	6.36774e-120	0.417738	0.801	0.554	1.14511e-115	6	Lgals9
	1.00591e-119	0.30451	1	0.992	1.80892e-115	6	Prdx2
	1.5346e-118	0.258011	0.444	0.179	2.75968e-114	6	Echdc2
	4.23857e-118	0.331803	0.982	0.922	7.62222e-114	6	Chmp4b
	8.74425e-118	0.706469	0.639	0.372	1.57248e-113	6	Osr1
	9.8783e-118	0.305854	0.995	0.965	1.77641e-113	6	Slc25a3
	3.6222e-117	0.508748	0.851	0.676	6.5138e-113	6	Tmem119
	1.3413e-116	0.362024	0.862	0.654	2.41206e-112	6	Rab5c
	5.57275e-116	0.310316	0.434	0.173	1.00215e-111	6	Usp18
	9.51582e-116	0.548178	0.984	0.992	1.71123e-111	6	Timp2
	1.52628e-114	0.323391	0.674	0.378	2.74471e-110	6	Sptlc2
	1.59364e-114	0.391573	0.955	0.881	2.86584e-110	6	Nnmt
	5.14044e-114	0.35924	0.646	0.37	9.24404e-110	6	Adam10
	1.64483e-113	0.271682	0.572	0.269	2.9579e-109	6	Hspb2
	6.73729e-113	0.349669	0.775	0.485	1.21157e-108	6	Sfxn1
	1.21208e-112	0.367145	0.587	0.309	2.17968e-108	6	Hacd4
	1.60259e-112	1.04122	0.34	0.125	2.88193e-108	6	Angptl7
	7.97062e-112	0.280988	0.495	0.222	1.43336e-107	6	Tap1
	9.5971e-112	0.270973	0.376	0.144	1.72585e-107	6	Exoc6b
	3.04914e-111	0.449091	0.768	0.509	5.48327e-107	6	Metrnl
	3.93407e-111	0.801484	0.566	0.295	7.07464e-107	6	S100a4
	4.9724e-111	0.286754	0.518	0.244	8.94187e-107	6	Pcyox1
	5.03766e-111	0.258223	0.389	0.15	9.05922e-107	6	Epb41l3
	7.79202e-111	0.313252	0.596	0.309	1.40124e-106	6	Ube2h
	9.53108e-111	0.322924	0.591	0.307	1.71397e-106	6	Pts
	1.90735e-110	0.387311	0.8	0.536	3.42999e-106	6	Arid5b
	2.61128e-110	0.311452	0.612	0.324	4.69587e-106	6	Naglu
	5.92811e-110	0.330631	0.76	0.478	1.06605e-105	6	Tbl1x
	1.24768e-109	0.616815	0.792	0.602	2.24371e-105	6	Nfkbia
	1.68064e-108	0.595607	0.407	0.167	3.02229e-104	6	Des
	2.27135e-108	0.279576	0.498	0.23	4.08457e-104	6	Usp25
	4.38335e-108	0.399328	0.986	0.964	7.88258e-104	6	Pkm
	6.35075e-108	0.29471	0.508	0.232	1.14205e-103	6	Icam1
	1.96823e-107	0.300142	0.618	0.332	3.53947e-103	6	Pef1
	3.30458e-107	0.301977	0.602	0.32	5.94263e-103	6	Exosc7
	3.97055e-107	0.327953	0.627	0.348	7.14025e-103	6	Bbx
	4.8203e-107	0.377572	0.804	0.524	8.66835e-103	6	Tcea3
	1.19847e-106	0.27377	0.369	0.138	2.15521e-102	6	Gmnn
	1.40678e-106	0.257757	0.421	0.173	2.52981e-102	6	Ifih1
	1.82783e-105	0.382632	0.483	0.227	3.28699e-101	6	Cd44
	2.85773e-105	0.3157	0.454	0.204	5.13905e-101	6	Mmp19
	5.7505e-105	0.328323	0.886	0.679	1.03411e-100	6	Cnih4
	1.09671e-104	0.317919	0.746	0.474	1.97221e-100	6	Hadh
	1.4234e-104	0.260493	0.457	0.187	2.5597e-100	6	Ackr3
	1.54639e-104	0.298999	0.405	0.163	2.78087e-100	6	Cox6b2
	2.80856e-104	0.28339	1	0.995	5.05064e-100	6	Pabpc1
	5.516e-104	0.254008	0.396	0.162	9.91942e-100	6	Sorbs3
	7.82849e-104	0.367382	0.535	0.269	1.4078e-99	6	Pim1
	3.37473e-102	0.263842	0.427	0.183	6.06878e-98	6	Flnb
	1.98743e-101	0.451118	0.879	0.76	3.57399e-97	6	Dync1i2
	3.15429e-101	0.348409	0.435	0.19	5.67236e-97	6	AW112010
	4.39495e-101	0.386584	0.843	0.661	7.90343e-97	6	Pnrc1
	2.71133e-100	0.518343	0.692	0.472	4.87578e-96	6	Gfpt2
	2.96721e-100	0.540161	0.389	0.161	5.33594e-96	6	Ccl2
	5.38682e-100	0.262237	1	1	9.68713e-96	6	Rpl38
	7.18964e-100	0.312923	0.762	0.499	1.29291e-95	6	Aldh7a1
	9.22055e-100	0.481848	0.667	0.418	1.65813e-95	6	Gabarapl1
	2.08884e-99	0.261417	0.459	0.206	3.75636e-95	6	Ctxn1
	3.23309e-99	0.317265	0.636	0.353	5.81407e-95	6	Sp100
	1.13991e-98	0.329125	0.704	0.425	2.04991e-94	6	Pycard
	2.16032e-98	0.286827	0.543	0.276	3.8849e-94	6	Zcchc11
	2.7987e-98	0.25998	0.512	0.25	5.0329e-94	6	Dhx32
	3.47489e-98	0.397253	0.63	0.368	6.24889e-94	6	Sdf2l1
	4.21168e-98	0.27177	0.58	0.3	7.57387e-94	6	Ssbp3
	1.38939e-97	0.253179	1	0.998	2.49854e-93	6	Ndufa4
	3.15189e-97	0.426562	0.755	0.532	5.66804e-93	6	Rgs10
	4.77896e-97	0.352944	0.824	0.598	8.59401e-93	6	Pgrmc1
	1.38123e-96	0.367175	0.998	0.979	2.48387e-92	6	Gapdh
	2.94797e-96	0.38388	0.798	0.58	5.30134e-92	6	Ppfibp1
	1.92652e-95	0.303007	0.538	0.277	3.46446e-91	6	Klf10
	1.00339e-94	0.277738	0.552	0.284	1.8044e-90	6	Irf9
	1.8594e-94	0.255188	0.335	0.126	3.34376e-90	6	Mustn1
	2.01549e-94	0.318839	0.78	0.514	3.62445e-90	6	Pold4
	1.0545e-92	0.378068	0.994	0.986	1.89631e-88	6	Dbi
	1.33457e-92	0.365056	0.58	0.331	2.39996e-88	6	Nxn
	6.1241e-92	0.257264	0.517	0.256	1.1013e-87	6	Eif2ak2
	2.81084e-91	0.312654	0.636	0.378	5.05473e-87	6	Akt2
	3.5027e-91	0.424114	0.73	0.52	6.2989e-87	6	Cxcl16
	1.40293e-90	0.279549	0.382	0.167	2.52288e-86	6	Crim1
	1.33042e-89	0.471969	0.968	0.915	2.39249e-85	6	Ifi27l2a
	1.35885e-89	0.331471	0.815	0.588	2.44361e-85	6	Pbx1
	2.63331e-89	0.305514	0.627	0.369	4.73548e-85	6	Hpcal1
	2.82845e-89	0.277154	0.514	0.268	5.08641e-85	6	Suclg2
	1.86555e-88	0.338118	0.739	0.493	3.35481e-84	6	Mast4
	2.47234e-88	0.300708	0.621	0.358	4.44602e-84	6	Zmiz1
	5.43155e-88	0.636405	0.533	0.291	9.76755e-84	6	Cdkn1c
	9.03832e-88	0.444278	0.708	0.467	1.62536e-83	6	Cd55
	2.2513e-87	0.362641	0.907	0.762	4.04852e-83	6	Hmgn2
	6.36399e-87	0.450547	0.881	0.815	1.14444e-82	6	Iscu
	7.84932e-87	0.266505	0.565	0.31	1.41154e-82	6	Spsb2
	9.13437e-87	0.400953	0.706	0.502	1.64263e-82	6	Card19
	1.64251e-86	0.269821	0.54	0.286	2.95372e-82	6	Samhd1
	5.52503e-86	0.262605	0.354	0.149	9.93566e-82	6	Nkd1
	9.36224e-86	0.278895	0.575	0.319	1.68361e-81	6	Tnfaip8
	2.54628e-85	0.509439	0.894	0.811	4.57897e-81	6	Fos
	2.9891e-85	0.655626	0.443	0.226	5.3753e-81	6	Fabp4
	5.18607e-85	0.300504	0.595	0.332	9.32612e-81	6	Irgm1
	5.47915e-85	0.299257	0.838	0.62	9.85316e-81	6	Rrp1
	5.83779e-85	0.355276	0.595	0.337	1.04981e-80	6	Socs3
	8.89639e-85	0.288242	0.636	0.389	1.59984e-80	6	Arid4b
	1.07454e-84	0.318177	0.83	0.619	1.93235e-80	6	Carhsp1
	1.74702e-84	0.301608	0.756	0.511	3.14167e-80	6	Lrp10
	4.15573e-84	0.312073	0.718	0.478	7.47325e-80	6	Gm8186
	4.19727e-84	0.370657	0.822	0.607	7.54794e-80	6	B4galt1
	5.46151e-84	0.732239	0.359	0.155	9.82144e-80	6	Cxcl5
	6.41386e-84	0.381076	0.487	0.259	1.1534e-79	6	Slc16a3
	8.55173e-84	0.382637	0.768	0.585	1.53786e-79	6	Klf3
	1.45085e-83	0.285592	0.972	0.933	2.60907e-79	6	Dnaja1
	2.24769e-83	0.314962	0.35	0.146	4.04202e-79	6	Ifit3b
	3.15699e-83	0.329385	0.296	0.115	5.67721e-79	6	Fabp3
	3.34767e-83	0.252808	0.524	0.277	6.02011e-79	6	2510002D24Rik
	1.82227e-82	0.336788	0.864	0.688	3.277e-78	6	Zfand6
	9.54984e-82	0.284297	0.935	0.846	1.71735e-77	6	Etfb
	1.07041e-81	0.30251	0.787	0.564	1.92492e-77	6	G3bp2
	1.27996e-81	0.365371	0.799	0.547	2.30175e-77	6	Angptl4
	3.889e-81	0.250869	0.565	0.31	6.99359e-77	6	Atp9a
	1.2637e-80	0.32004	0.532	0.297	2.27251e-76	6	Sil1
	1.89836e-80	0.504931	0.864	0.785	3.41383e-76	6	Aplp2
	4.42216e-80	0.251801	0.538	0.292	7.95237e-76	6	Nab2
	1.5858e-79	0.414868	0.806	0.636	2.85175e-75	6	Clic4
	2.38874e-79	0.255667	0.451	0.226	4.29568e-75	6	Tob1
	4.0743e-79	0.390108	0.88	0.744	7.32682e-75	6	Heg1
	5.47317e-79	0.277094	0.979	0.939	9.84241e-75	6	Tbrg1
	1.80382e-78	0.34232	0.808	0.603	3.24381e-74	6	Psip1
	6.3085e-77	0.459948	0.522	0.302	1.13446e-72	6	Ifit3
	9.2459e-77	0.355273	0.598	0.367	1.66269e-72	6	Soat1
	9.98365e-77	0.263578	0.43	0.214	1.79536e-72	6	Cyp2d22
	1.10341e-76	0.472517	0.96	0.918	1.98427e-72	6	Tpm1
	2.35706e-76	0.266131	0.514	0.286	4.2387e-72	6	Agtrap
	6.28845e-76	0.305201	0.736	0.51	1.13085e-71	6	Ehd1
	9.69119e-76	0.253743	0.535	0.299	1.74277e-71	6	Ano6
	1.1064e-74	0.300411	0.55	0.323	1.98964e-70	6	Fzd1
	3.32452e-74	0.263673	0.904	0.751	5.97848e-70	6	Lamtor4
	4.65346e-74	0.270738	0.631	0.396	8.36832e-70	6	Mif4gd
	5.96105e-74	0.821556	0.999	1	1.07197e-69	6	Crip1
	2.03613e-73	0.280721	0.947	0.878	3.66157e-69	6	Rnh1
	2.52158e-73	0.25751	0.321	0.138	4.53456e-69	6	Slc38a4
	3.06995e-73	0.261529	0.924	0.805	5.5207e-69	6	Eif3m
	7.9361e-73	0.259919	0.96	0.895	1.42715e-68	6	Cd47
	2.39021e-72	0.250099	0.557	0.317	4.29832e-68	6	Plce1
	6.56632e-72	0.295934	0.681	0.467	1.18082e-67	6	Glb1
	7.77857e-72	0.646727	0.617	0.413	1.39882e-67	6	Plac8
	1.35783e-71	0.250688	0.615	0.376	2.44179e-67	6	Vwa5a
	1.92937e-70	0.452029	0.763	0.582	3.46959e-66	6	Tubb4b
	1.97434e-70	0.284692	0.655	0.433	3.55046e-66	6	Man2b1
	3.31681e-70	0.37615	0.768	0.583	5.96462e-66	6	Sod2
	3.44375e-70	0.267416	0.823	0.625	6.1929e-66	6	Atp6v1e1
	1.40024e-69	0.355243	0.794	0.623	2.51806e-65	6	Nbl1
	1.70172e-69	0.330615	0.794	0.597	3.0602e-65	6	Gstp1
	5.89096e-69	0.357976	0.606	0.373	1.05937e-64	6	Bok
	3.71697e-68	0.282927	0.991	0.975	6.68422e-64	6	Cyb5a
	1.20912e-67	0.329523	0.728	0.537	2.17435e-63	6	Emp2
	1.32608e-67	0.285384	0.81	0.63	2.38469e-63	6	Zfyve21
	3.80558e-67	0.282734	0.718	0.499	6.84357e-63	6	Pbxip1
	4.74849e-67	0.385197	0.675	0.49	8.5392e-63	6	Gltp
	4.98927e-67	0.254068	0.686	0.456	8.9722e-63	6	Mvp
	5.21316e-67	0.268482	0.77	0.557	9.37483e-63	6	Stat3
	3.27545e-66	0.690996	0.515	0.307	5.89025e-62	6	Hp
	2.02164e-65	0.294925	0.367	0.179	3.63551e-61	6	Podn
	8.57414e-65	0.399542	0.592	0.381	1.54189e-60	6	Hist1h1c
	9.50993e-65	0.286775	0.378	0.18	1.71017e-60	6	Ccl7
	1.30221e-64	0.292593	0.75	0.535	2.34177e-60	6	Grb10
	5.51881e-64	0.258149	0.411	0.218	9.92448e-60	6	Cers4
	9.42391e-64	0.342322	0.994	0.999	1.6947e-59	6	Anxa2
	1.84495e-63	0.299063	0.849	0.686	3.31778e-59	6	Ppp3ca
	6.72354e-63	0.264307	0.925	0.843	1.20909e-58	6	Arl6ip5
	9.03111e-63	0.258455	0.772	0.577	1.62406e-58	6	Rbbp4
	1.08296e-62	0.282356	0.592	0.364	1.94749e-58	6	Plscr2
	1.35069e-62	0.358706	0.823	0.686	2.42895e-58	6	Elovl1
	3.30054e-62	0.29325	0.986	0.977	5.93535e-58	6	Anxa1
	1.35211e-61	0.301199	0.87	0.731	2.4315e-57	6	Cmtm7
	1.4774e-60	0.26066	0.697	0.498	2.65681e-56	6	Stx7
	2.97423e-60	0.272063	0.822	0.656	5.34856e-56	6	Plp2
	3.09099e-60	0.295239	0.974	0.949	5.55853e-56	6	Mdh2
	7.41215e-60	0.335062	0.68	0.485	1.33293e-55	6	Add3
	9.72292e-60	0.269552	0.876	0.733	1.74847e-55	6	Akr1b3
	2.51819e-58	0.263945	0.595	0.388	4.52846e-54	6	Tmem120a
	3.02747e-58	0.341105	0.83	0.688	5.44429e-54	6	Ugdh
	1.69058e-57	0.267149	0.81	0.636	3.04017e-53	6	Pnp
	1.01229e-56	0.71182	0.707	0.569	1.82041e-52	6	Gm42418
	1.24637e-56	0.277628	0.646	0.434	2.24134e-52	6	Ifi203
	3.90965e-56	0.26638	0.439	0.25	7.03072e-52	6	Nfkbiz
	7.86306e-56	0.315856	0.951	0.925	1.41401e-51	6	Zfp706
	4.68426e-55	0.256908	0.596	0.395	8.42371e-51	6	2810474O19Rik
	5.3754e-55	0.274848	0.563	0.362	9.66658e-51	6	Ier5
	1.70787e-52	0.274531	0.769	0.619	3.07126e-48	6	Ctnna1
	2.04184e-52	0.39994	0.683	0.503	3.67184e-48	6	Klf4
	1.10002e-51	0.27425	0.756	0.562	1.97817e-47	6	Slc38a2
	2.58227e-51	0.291542	0.496	0.313	4.6437e-47	6	Tbx18
	7.33687e-51	0.250964	0.843	0.709	1.31939e-46	6	Ywhaz
	9.75875e-51	0.534602	0.997	0.998	1.75492e-46	6	Mgp
	1.03788e-49	0.256063	0.954	0.91	1.86642e-45	6	Bri3
	2.71139e-49	0.282049	0.993	0.986	4.87588e-45	6	Cald1
	5.48708e-49	0.558707	0.283	0.142	9.86742e-45	6	Tnfrsf11b
	2.35584e-48	0.311307	0.838	0.751	4.23651e-44	6	Taldo1
	4.44336e-48	0.301889	0.802	0.65	7.9905e-44	6	Sox4
	1.55838e-47	0.289539	0.683	0.517	2.80243e-43	6	Tmem33
	3.83967e-47	0.267136	0.594	0.422	6.90487e-43	6	Sh3glb2
	3.11042e-46	0.299836	0.405	0.241	5.59347e-42	6	Tshz2
	5.56849e-46	0.253118	0.427	0.26	1.00138e-41	6	Arf2
	6.42381e-46	0.367093	0.713	0.572	1.15519e-41	6	Neat1
	1.94117e-45	0.256766	0.299	0.154	3.4908e-41	6	Nr4a2
	2.56692e-44	0.313228	0.981	0.961	4.61609e-40	6	H2afz
	3.44309e-41	0.262716	0.435	0.255	6.1917e-37	6	Cxcl1
	1.06736e-37	0.339032	0.931	0.921	1.91943e-33	6	Cryab
	1.12285e-37	0.275073	0.865	0.791	2.01923e-33	6	Gas1
	6.25234e-37	0.262266	0.833	0.712	1.12436e-32	6	Prdx6
	7.2007e-33	0.327982	0.671	0.503	1.2949e-28	6	Hmgb2
	2.3993e-32	0.29919	0.974	0.984	4.31466e-28	6	Timp1
	1.41926e-30	0.252373	0.754	0.637	2.55226e-26	6	Aldh1a1
	6.26616e-29	0.307063	0.409	0.284	1.12684e-24	6	Peg3
	3.35439e-28	0.450741	0.504	0.397	6.0322e-24	6	Ncam1
	2.29977e-27	0.391581	0.847	0.835	4.13567e-23	6	Klf2
	3.80301e-25	0.439525	0.769	0.734	6.83896e-21	6	Cpxm1
	7.58379e-25	0.327223	0.782	0.703	1.36379e-20	6	Ier2
	3.82923e-24	0.316783	0.566	0.468	6.88611e-20	6	Txnip
	5.58228e-20	0.275477	0.891	0.843	1.00386e-15	6	Timp3
	1.84079e-18	0.279839	0.697	0.644	3.3103e-14	6	Ly6a
	1.187e-16	0.386072	0.699	0.661	2.13457e-12	6	Dusp1
	1.10012e-15	0.528815	0.51	0.454	1.97835e-11	6	C1qtnf12
	2.10908e-15	0.730477	0.843	0.912	3.79276e-11	6	Rarres2
	1.92659e-13	0.312342	0.565	0.515	3.46459e-09	6	Prnp
	6.2305e-09	0.258729	0.532	0.682	0.000112043	6	Cxcl12
	3.17336e-08	0.579857	0.641	0.66	0.000570665	6	Uap1
	2.96694e-06	0.300768	0.829	0.949	0.0533545	6	Tm4sf1
	1.06804e-05	0.297656	0.461	0.449	0.192065	6	Bace2
	0	1.6047	0.794	0.145	0	7	Cenpa
	0	1.57521	0.963	0.406	0	7	Stmn1
	0	1.30208	0.825	0.11	0	7	Ccnb2
	0	1.30043	0.995	0.96	0	7	H2afz
	0	1.25103	0.954	0.574	0	7	Selenoh
	0	1.21882	0.992	0.76	0	7	Hmgn2
	0	1.09929	0.851	0.213	0	7	Lockd
	0	0.976503	1	0.992	0	7	Hmgb1
	0	0.897045	0.674	0.106	0	7	Cdca3
	0	0.859685	0.601	0.069	0	7	Kif20a
	0	0.853155	0.634	0.153	0	7	Birc5
	0	0.83784	0.614	0.094	0	7	Cdkn3
	0	0.836988	0.99	0.917	0	7	H2afv
	0	0.813321	0.998	0.935	0	7	Ran
	0	0.811163	0.507	0.083	0	7	Tpx2
	0	0.722977	0.547	0.079	0	7	Knstrn
	0	0.663494	0.585	0.106	0	7	Tacc3
	0	0.612973	0.404	0.056	0	7	Hmmr
	0	0.606553	0.518	0.065	0	7	Nuf2
	0	0.592793	0.607	0.106	0	7	Cenpm
	0	0.584685	0.633	0.135	0	7	Spc24
	0	0.574418	0.521	0.071	0	7	Cenpf
	0	0.54037	0.629	0.122	0	7	Pclaf
	0	0.489928	0.366	0.054	0	7	Kif23
	0	0.473176	0.445	0.075	0	7	Mki67
	1.55052e-306	0.404706	0.372	0.057	2.78831e-302	7	Ckap2l
	1.18665e-298	0.600809	0.469	0.096	2.13396e-294	7	Racgap1
	3.76591e-293	0.639589	0.475	0.1	6.77224e-289	7	Cdca8
	6.35528e-283	0.63011	0.996	0.957	1.14287e-278	7	Hnrnpa2b1
	1.35243e-275	0.53255	0.348	0.056	2.43207e-271	7	Cenpe
	9.37331e-275	0.621828	1	1	1.6856e-270	7	Dynll1
	5.25117e-274	0.648721	0.996	0.965	9.44318e-270	7	Gpx7
	9.81655e-264	0.443581	0.43	0.089	1.76531e-259	7	Diaph3
	7.05426e-260	0.376252	0.336	0.056	1.26857e-255	7	C330027C09Rik
	2.97621e-259	0.500421	0.507	0.126	5.35213e-255	7	Mad2l1
	4.33624e-258	0.487427	0.426	0.09	7.79786e-254	7	Anln
	8.09122e-256	0.480127	1	1	1.45504e-251	7	Lgals1
	5.65669e-250	0.509451	1	0.999	1.01724e-245	7	Cfl1
	3.77946e-249	0.555062	0.389	0.078	6.7966e-245	7	Ckap2
	5.64883e-249	0.613689	0.677	0.243	1.01583e-244	7	Hmgb3
	3.02386e-245	0.50698	1	1	5.4378e-241	7	Ppia
	5.99584e-241	0.533933	0.394	0.081	1.07823e-236	7	Ccnb1
	1.81797e-240	0.9383	0.462	0.115	3.26926e-236	7	Cdc20
	6.39332e-238	0.605653	0.991	0.931	1.14971e-233	7	Calm3
	6.42258e-238	0.519757	0.545	0.158	1.15497e-233	7	Cenpw
	1.48017e-237	0.469212	0.999	0.995	2.66179e-233	7	Hmgn1
	2.89468e-231	1.19167	0.71	0.315	5.2055e-227	7	Cks2
	4.50773e-228	0.413301	1	1	8.10625e-224	7	Ybx1
	1.21397e-216	0.602235	0.997	0.97	2.18307e-212	7	Lmna
	5.61627e-216	0.338572	1	1	1.00997e-211	7	Oaz1
	1.21712e-213	0.466647	1	1	2.18875e-209	7	Ptma
	4.49173e-211	0.627721	0.995	0.966	8.07747e-207	7	Ptms
	1.30139e-208	0.555632	0.741	0.326	2.34029e-204	7	Ddx39
	2.07718e-206	0.491659	1	0.994	3.7354e-202	7	Eif5a
	7.79639e-206	0.588461	0.761	0.366	1.40202e-201	7	Anp32e
	6.25945e-205	0.672461	0.956	0.836	1.12564e-200	7	Hdgf
	2.26422e-197	0.37289	1	1	4.07174e-193	7	Pfn1
	3.38475e-195	0.576782	0.98	0.846	6.08679e-191	7	Hnrnpa1
	2.5666e-192	0.686221	0.89	0.616	4.61552e-188	7	Nucks1
	1.4772e-190	0.376108	0.44	0.121	2.65644e-186	7	Hist1h4i
	3.92744e-189	0.584751	0.92	0.698	7.06271e-185	7	Lsm5
	4.96997e-188	0.500688	0.999	0.984	8.9375e-184	7	2007-09-01
	4.52037e-185	0.524111	0.997	0.959	8.12898e-181	7	Rbm3
	1.52864e-181	0.391844	1	0.999	2.74896e-177	7	Calm1
	1.13561e-180	0.332151	0.312	0.064	2.04217e-176	7	Plk1
	1.02059e-179	0.523248	0.358	0.084	1.83533e-175	7	Ccna2
	1.01555e-177	0.473558	1	0.991	1.82627e-173	7	Tpm4
	2.86119e-176	0.394635	1	0.995	5.14528e-172	7	Hnrnpk
	1.12613e-170	0.445921	0.998	0.991	2.02513e-166	7	Atp5b
	2.13008e-170	0.432055	0.997	0.982	3.83052e-166	7	Cox7a2
	3.32907e-170	0.39383	0.998	0.99	5.98667e-166	7	Ywhae
	2.19725e-169	0.539951	0.942	0.75	3.95131e-165	7	Hmgn3
	7.47011e-169	0.441463	1	0.982	1.34335e-164	7	Txn1
	2.66607e-167	0.288646	0.28	0.057	4.79439e-163	7	Bub1b
	9.17053e-158	0.356419	1	0.997	1.64914e-153	7	Tmed2
	2.50482e-157	0.597479	0.775	0.467	4.50442e-153	7	Ccdc34
	9.23488e-156	0.302082	1	1	1.66071e-151	7	Prdx1
	1.2266e-155	0.253473	0.273	0.057	2.20579e-151	7	Shcbp1
	7.95271e-154	0.532612	0.795	0.479	1.43014e-149	7	Rnaseh2c
	1.47878e-153	0.584499	0.988	0.926	2.6593e-149	7	Tuba1b
	1.65126e-153	0.369516	1	0.997	2.96946e-149	7	Eif4a1
	2.37065e-152	0.453063	0.994	0.962	4.26314e-148	7	Slc25a5
	7.77384e-150	0.411524	0.988	0.92	1.39797e-145	7	Snrpf
	1.16341e-149	0.378623	0.997	0.991	2.09216e-145	7	Morf4l2
	8.2143e-148	0.392845	0.271	0.059	1.47718e-143	7	Pimreg
	6.83332e-145	0.38355	0.997	0.964	1.22884e-140	7	Ywhaq
	2.0187e-142	0.398243	0.533	0.21	3.63023e-138	7	Hmgn5
	1.47198e-140	0.390564	0.99	0.943	2.64707e-136	7	Psma4
	3.3065e-140	0.467813	0.883	0.664	5.94608e-136	7	Dazap1
	1.35608e-138	0.506136	0.998	0.981	2.43865e-134	7	Tagln2
	1.84054e-138	0.466805	0.95	0.799	3.30984e-134	7	Fkbp2
	4.74256e-138	0.509407	0.924	0.77	8.52855e-134	7	Srsf2
	4.50793e-137	0.479813	1	0.999	8.10661e-133	7	Calm2
	8.43842e-134	0.512436	1	1	1.51748e-129	7	Actb
	1.22645e-131	0.39182	0.993	0.944	2.20552e-127	7	Prdx4
	1.27943e-131	0.426076	0.97	0.877	2.30081e-127	7	Hnrnpa3
	9.77188e-131	0.463709	0.663	0.348	1.75728e-126	7	Rdm1
	1.77406e-130	0.289712	0.999	1	3.19029e-126	7	Elob
	5.04244e-129	0.368564	0.992	0.973	9.06782e-125	7	Psma3
	1.32552e-128	0.363396	0.323	0.093	2.38369e-124	7	Acp6
	2.18697e-128	0.534609	0.927	0.768	3.93282e-124	7	Srsf3
	4.42272e-126	0.428176	0.962	0.888	7.95338e-122	7	Anp32b
	1.11247e-125	0.369726	0.483	0.185	2.00056e-121	7	Rangap1
	4.09677e-125	0.461867	0.907	0.758	7.36723e-121	7	Vdac1
	1.42625e-124	0.433788	0.903	0.712	2.56482e-120	7	Lsm6
	2.56868e-122	0.311338	1	0.997	4.61926e-118	7	Uqcrb
	3.24119e-122	0.358497	0.996	0.988	5.82864e-118	7	Hint1
	6.43133e-122	0.305063	1	0.994	1.15655e-117	7	Swi5
	3.13237e-119	0.480987	0.637	0.325	5.63294e-115	7	1500009L16Rik
	8.85587e-119	0.385282	0.999	0.98	1.59255e-114	7	Rhoa
	1.28119e-117	0.414542	0.958	0.844	2.30396e-113	7	Sh3bgrl
	2.88655e-117	0.39491	0.997	0.982	5.19088e-113	7	Tspo
	3.22593e-117	0.382937	0.616	0.305	5.80119e-113	7	Ptgr1
	4.28947e-117	0.426983	0.906	0.694	7.71375e-113	7	Banf1
	1.96917e-115	0.363265	0.977	0.945	3.54117e-111	7	Vcp
	3.83415e-115	0.407166	0.908	0.734	6.89496e-111	7	Cwc15
	3.83561e-115	0.281615	0.33	0.101	6.89758e-111	7	Gm11837
	4.81342e-114	0.389826	1	1	8.65597e-110	7	Vim
	1.28788e-113	0.729866	0.917	0.84	2.31599e-109	7	Ube2s
	1.79673e-113	0.658604	0.676	0.379	3.23106e-109	7	Hist1h1c
	2.38188e-113	0.33045	0.997	0.993	4.28334e-109	7	Fkbp1a
	6.98473e-112	0.35033	0.982	0.927	1.25606e-107	7	Ndufb8
	1.13324e-111	0.314089	0.999	0.993	2.03791e-107	7	Cdc42
	3.72161e-111	0.326358	0.995	0.974	6.69256e-107	7	Serbp1
	8.55897e-111	0.288039	0.287	0.08	1.53916e-106	7	Kif22
	9.96457e-111	0.389196	0.952	0.841	1.79193e-106	7	Anapc5
	2.19838e-108	0.401328	0.838	0.598	3.95335e-104	7	Npm3
	5.44194e-108	0.410539	1	1	9.78623e-104	7	Actg1
	6.29807e-108	0.391451	0.955	0.851	1.13258e-103	7	Hnrnpu
	1.94701e-107	0.341039	0.988	0.95	3.50131e-103	7	Ranbp1
	2.76113e-107	0.364777	1	1	4.96533e-103	7	S100a11
	3.85096e-107	0.384815	0.929	0.811	6.92518e-103	7	Lsm4
	7.39687e-107	0.337616	0.996	0.986	1.33018e-102	7	Gnb2
	1.44752e-106	0.635481	0.929	0.825	2.60307e-102	7	Hist1h2bc
	2.38504e-106	0.348913	1	0.995	4.28902e-102	7	Hsp90b1
	6.14982e-105	0.381317	0.85	0.626	1.10592e-100	7	Cacybp
	6.43982e-103	0.397704	0.766	0.496	1.15807e-98	7	Sae1
	1.58992e-102	0.276305	1	1	2.85915e-98	7	Anxa5
	3.97646e-102	0.378685	0.911	0.748	7.15086e-98	7	Commd1
	2.64994e-101	0.388551	0.924	0.785	4.76539e-97	7	Pdap1
	5.22293e-101	0.452346	0.839	0.635	9.3924e-97	7	Sfpq
	8.46528e-101	0.319793	0.989	0.95	1.52231e-96	7	Cox5a
	2.25313e-100	0.39579	0.944	0.826	4.05181e-96	7	Msn
	3.5067e-100	0.321486	0.985	0.949	6.3061e-96	7	Snx3
	7.928e-100	0.45912	0.652	0.363	1.42569e-95	7	Tmpo
	2.13106e-99	0.330799	0.965	0.916	3.83229e-95	7	Ndufa5
	4.71564e-99	0.373237	0.752	0.465	8.48013e-95	7	Snrpa1
	6.6422e-99	0.372453	0.905	0.727	1.19447e-94	7	Hnrnpm
	3.07178e-98	0.317868	0.998	0.984	5.52398e-94	7	Clic1
	6.09143e-97	0.364497	0.971	0.901	1.09542e-92	7	Tpm3
	4.76593e-96	0.391408	0.849	0.641	8.57057e-92	7	Psmc1
	1.01676e-95	0.269805	0.438	0.177	1.82845e-91	7	Pmf1
	1.52364e-95	0.271952	1	0.998	2.73996e-91	7	Rps27l
	3.92987e-93	0.69988	0.98	0.915	7.06708e-89	7	Ifi27l2a
	2.47155e-92	0.287503	0.996	0.984	4.44459e-88	7	Ppp1ca
	9.88692e-92	0.266321	1	1	1.77796e-87	7	Myl12a
	5.03354e-91	0.322643	0.99	0.968	9.05182e-87	7	Rac1
	6.48017e-91	0.271812	0.999	0.992	1.16533e-86	7	Tmed9
	7.06667e-91	0.409859	0.996	0.979	1.2708e-86	7	Gapdh
	2.72281e-89	0.337844	0.927	0.797	4.89644e-85	7	Bzw1
	1.75408e-88	0.311197	0.945	0.858	3.15437e-84	7	Psmc3
	8.27776e-88	0.364121	0.952	0.87	1.48859e-83	7	Pgam1
	1.15254e-87	0.287348	0.991	0.967	2.07261e-83	7	Ap2m1
	1.17072e-87	0.312616	0.984	0.943	2.10531e-83	7	Snrpb
	3.1921e-87	0.320809	0.995	0.975	5.74035e-83	7	Mrfap1
	5.53363e-87	0.419697	0.801	0.603	9.95113e-83	7	Hp1bp3
	7.26867e-87	0.294128	0.998	0.99	1.30713e-82	7	Emp3
	1.70881e-86	0.30005	0.988	0.949	3.07294e-82	7	Psmb3
	4.22187e-86	0.343077	0.93	0.774	7.59218e-82	7	Pgk1
	1.26747e-85	0.333073	0.919	0.802	2.27928e-81	7	Cct7
	1.47983e-85	0.318952	0.985	0.953	2.66118e-81	7	Hnrnpf
	2.3982e-85	0.361716	0.897	0.776	4.31268e-81	7	Jpt1
	4.08953e-84	0.310082	0.987	0.963	7.3542e-80	7	Gdi2
	5.80175e-84	0.306674	0.971	0.909	1.04333e-79	7	Mlf2
	6.05063e-84	0.367391	0.967	0.921	1.08809e-79	7	Hsp90aa1
	1.4624e-82	0.290711	0.981	0.906	2.62983e-78	7	Nme1
	5.32584e-81	0.25155	0.999	0.997	9.57745e-77	7	Arf4
	1.99372e-80	0.36228	0.911	0.788	3.58531e-76	7	Tpi1
	8.82505e-80	0.368901	0.95	0.854	1.58701e-75	7	Actr3
	2.70028e-79	0.321842	0.931	0.849	4.85591e-75	7	Hnrnpc
	4.54728e-79	0.324692	0.94	0.802	8.17738e-75	7	Cycs
	9.46564e-79	0.250245	0.996	0.993	1.70221e-74	7	Tma7
	4.61063e-78	0.278971	0.985	0.942	8.2913e-74	7	Psma2
	1.10651e-77	0.443011	0.588	0.35	1.98984e-73	7	Rad21
	1.35167e-77	0.300421	0.993	0.983	2.43071e-73	7	Ldha
	5.76787e-77	0.278725	0.491	0.243	1.03724e-72	7	Ppih
	2.07507e-76	0.396845	0.955	0.854	3.73159e-72	7	Cbx3
	2.17473e-76	0.378509	0.6	0.366	3.91082e-72	7	Rnf26
	3.02072e-76	0.270238	0.994	0.982	5.43216e-72	7	Arf1
	8.92361e-76	0.368474	0.835	0.669	1.60473e-71	7	Spop
	1.13821e-75	0.315325	0.982	0.953	2.04685e-71	7	Eif4g2
	1.7819e-75	0.257849	0.997	0.979	3.20439e-71	7	Atp5f1
	3.27146e-75	0.328774	0.687	0.443	5.88306e-71	7	Srsf1
	1.7672e-74	0.311643	0.899	0.756	3.17795e-70	7	Erh
	5.68041e-74	0.346085	0.841	0.64	1.02151e-69	7	Srsf7
	1.10095e-73	0.295551	0.954	0.874	1.97983e-69	7	Ube2n
	2.45686e-73	0.264104	0.986	0.923	4.41818e-69	7	Vdac3
	3.49721e-73	0.313098	0.947	0.852	6.28903e-69	7	Mdh1
	3.70258e-73	0.613747	0.602	0.362	6.65834e-69	7	Cst6
	9.72872e-73	0.250605	0.998	0.984	1.74952e-68	7	Atp5o.1
	1.29143e-72	0.274182	0.991	0.962	2.32237e-68	7	Arl1
	1.50097e-72	0.315069	0.991	0.971	2.6992e-68	7	Sh3glb1
	2.04462e-72	0.306434	0.894	0.745	3.67683e-68	7	Psmc6
	2.19745e-72	0.268181	0.34	0.14	3.95168e-68	7	Sms
	2.91932e-72	0.30829	0.927	0.825	5.24982e-68	7	Cct8
	7.57067e-72	0.294699	0.988	0.953	1.36143e-67	7	Cnbp
	3.95398e-71	0.330841	0.765	0.55	7.11045e-67	7	Snrpa
	6.91945e-71	0.346669	0.975	0.929	1.24432e-66	7	Ckap4
	1.46366e-70	0.321002	0.916	0.813	2.63211e-66	7	Raly
	3.52593e-70	0.278297	0.985	0.958	6.34067e-66	7	Atp5a1
	4.60807e-70	0.295205	0.954	0.875	8.2867e-66	7	Psmd7
	4.67676e-70	0.312196	0.884	0.748	8.41022e-66	7	Snrpc
	3.36763e-69	0.335477	0.823	0.636	6.056e-65	7	Nudt21
	8.81614e-69	0.321508	0.884	0.744	1.58541e-64	7	Cox20
	3.29768e-68	0.252736	0.997	0.991	5.93022e-64	7	2010107E04Rik
	7.06026e-68	0.30032	0.919	0.818	1.26965e-63	7	Snrpd3
	8.9e-68	0.31385	0.547	0.317	1.60049e-63	7	Cby1
	2.31487e-67	0.31658	0.821	0.628	4.16282e-63	7	Strap
	2.65139e-67	0.280246	0.953	0.877	4.768e-63	7	Mrps14
	2.95378e-67	0.251223	0.988	0.965	5.31178e-63	7	Psmb6
	3.22227e-67	0.36152	0.402	0.193	5.79461e-63	7	Lmnb1
	7.187e-67	0.262029	0.998	0.979	1.29244e-62	7	Itgb1
	7.2301e-67	0.268237	0.543	0.301	1.30019e-62	7	Srrt
	8.62859e-67	0.305031	0.455	0.229	1.55168e-62	7	H1fx
	1.16809e-66	0.273371	1	1	2.10058e-62	7	S100a6
	2.10647e-66	0.290281	0.996	0.977	3.78806e-62	7	Anxa1
	4.64123e-66	0.398109	0.707	0.501	8.34633e-62	7	Smc4
	6.10479e-66	0.332946	0.726	0.521	1.09782e-61	7	Fubp1
	8.13572e-66	0.312646	0.854	0.712	1.46305e-61	7	Ewsr1
	2.21028e-65	0.262333	0.474	0.246	3.97476e-61	7	Anapc15
	5.62163e-65	0.296582	0.618	0.379	1.01094e-60	7	Acsl5
	1.52296e-64	0.261431	0.976	0.947	2.73874e-60	7	Ndufs5
	1.72243e-64	0.313947	0.861	0.71	3.09744e-60	7	G3bp1
	2.10303e-64	0.303147	0.597	0.369	3.78188e-60	7	Lmf2
	5.35767e-64	0.285557	0.871	0.704	9.63469e-60	7	Snrpd1
	6.65014e-64	0.262035	0.971	0.911	1.19589e-59	7	Eloc
	7.26338e-64	0.287456	0.927	0.834	1.30617e-59	7	Set
	4.88927e-63	0.449969	0.74	0.574	8.79238e-59	7	Cks1b
	5.03386e-63	0.280802	0.95	0.873	9.05239e-59	7	Cct5
	1.03256e-62	0.317784	0.996	0.94	1.85686e-58	7	Emp1
	1.82405e-62	0.253203	0.989	0.962	3.28019e-58	7	Snrpg
	2.12367e-62	0.290473	0.908	0.795	3.819e-58	7	Txnl1
	2.7301e-61	0.317018	0.873	0.708	4.90953e-57	7	Loxl2
	8.92755e-61	0.33096	0.999	0.992	1.60544e-56	7	Tuba1a
	2.04567e-60	0.251124	0.983	0.95	3.67872e-56	7	Prkar1a
	4.01628e-60	0.311217	0.827	0.685	7.22248e-56	7	Elavl1
	6.39253e-60	0.285245	0.9	0.785	1.14957e-55	7	Degs1
	1.6992e-59	0.302783	0.767	0.567	3.05567e-55	7	Arl2bp
	3.97849e-59	0.292508	0.824	0.66	7.15451e-55	7	Cbx1
	5.46931e-59	0.301601	0.613	0.397	9.83546e-55	7	Ncaph2
	2.08149e-58	0.638956	0.739	0.585	3.74314e-54	7	Tubb4b
	3.86641e-58	0.262593	0.944	0.862	6.95297e-54	7	Psma1
	4.32286e-58	0.281897	0.82	0.647	7.7738e-54	7	Magoh
	5.70181e-58	0.250458	0.963	0.897	1.02536e-53	7	C1d
	5.8715e-58	0.407726	0.496	0.274	1.05587e-53	7	Ccnd1
	7.21891e-58	0.285033	0.886	0.768	1.29818e-53	7	Psmb7
	8.89637e-58	0.286164	0.772	0.573	1.59984e-53	7	Psmd14
	2.21555e-57	0.279261	0.909	0.789	3.98423e-53	7	Tcp1
	4.80386e-57	0.308594	0.784	0.619	8.63879e-53	7	Dtymk
	7.05017e-57	0.288443	0.824	0.646	1.26783e-52	7	Lrrc59
	8.45789e-57	0.297961	0.897	0.8	1.52098e-52	7	Ppp1cc
	1.56781e-56	0.264564	0.919	0.846	2.81939e-52	7	Ndufv2
	3.16086e-56	0.270206	0.552	0.332	5.68417e-52	7	Mpp1
	8.09691e-56	0.276519	0.809	0.626	1.45607e-51	7	Psmd12
	1.56657e-55	0.262283	0.913	0.824	2.81715e-51	7	Rbbp7
	1.84728e-55	0.636291	0.663	0.505	3.32196e-51	7	Hmgb2
	2.3405e-55	0.265838	0.615	0.391	4.20893e-51	7	Tmem237
	2.45445e-55	0.282029	0.68	0.474	4.41383e-51	7	Pih1d1
	2.70016e-55	0.250453	0.93	0.846	4.85569e-51	7	Rap1a
	4.9942e-55	0.263434	0.904	0.807	8.98106e-51	7	Ube2l3
	7.04594e-55	0.257028	0.879	0.75	1.26707e-50	7	Taldo1
	1.04522e-54	0.326714	0.914	0.832	1.87962e-50	7	Ckb
	1.94642e-54	0.271044	0.838	0.668	3.50025e-50	7	Psmd6
	6.4916e-54	0.285319	0.647	0.419	1.16738e-49	7	Jup
	9.71356e-54	0.296454	0.817	0.666	1.74679e-49	7	Nudcd2
	1.26917e-53	0.271507	0.808	0.645	2.28234e-49	7	Ccdc124
	2.04013e-53	0.288704	0.782	0.602	3.66876e-49	7	Ubl4a
	3.02058e-53	0.296	0.909	0.781	5.43191e-49	7	Gng11
	3.6132e-53	0.250504	0.862	0.71	6.49761e-49	7	Cct3
	5.85139e-53	0.262044	0.89	0.76	1.05226e-48	7	Prmt1
	9.67008e-53	0.38507	0.943	0.871	1.73897e-48	7	H1f0
	1.2266e-52	0.277985	0.948	0.889	2.2058e-48	7	Ncl
	1.81756e-52	0.277487	0.897	0.818	3.26853e-48	7	Ssb
	2.4329e-52	0.292068	0.734	0.548	4.37508e-48	7	Hnrnph1
	2.45314e-52	0.274736	0.881	0.769	4.41148e-48	7	Ddx39b
	2.59259e-52	0.288057	0.368	0.183	4.66225e-48	7	Smc2
	2.88123e-52	0.43204	0.82	0.706	5.18132e-48	7	Tubb6
	3.79949e-52	0.258089	0.948	0.891	6.83262e-48	7	Eny2
	4.32934e-52	0.296412	0.698	0.51	7.78545e-48	7	Lsm2
	4.34891e-52	0.263676	0.94	0.881	7.82065e-48	7	Nap1l1
	1.21912e-51	0.271772	0.924	0.86	2.19235e-47	7	Sdcbp
	1.68128e-51	0.269424	0.781	0.599	3.02344e-47	7	Naa50
	1.69616e-51	0.256864	0.979	0.91	3.05021e-47	7	Emilin1
	1.75822e-51	0.305028	0.96	0.896	3.16181e-47	7	Cd9
	2.15945e-51	0.264352	0.938	0.87	3.88333e-47	7	Psmb5
	2.16394e-51	0.274786	0.413	0.208	3.8914e-47	7	6030408B16Rik
	2.92964e-51	0.25447	0.88	0.766	5.26837e-47	7	U2af1
	4.40331e-51	0.277497	0.739	0.554	7.91847e-47	7	Idh3g
	5.47853e-51	0.271561	0.768	0.579	9.85204e-47	7	Selenot
	6.52918e-51	0.255589	0.57	0.354	1.17414e-46	7	Tmem97
	6.64494e-51	0.285401	0.778	0.61	1.19496e-46	7	Zfp207
	1.30449e-50	0.261105	0.691	0.493	2.34586e-46	7	Ilf2
	2.21794e-50	0.29773	0.797	0.635	3.98852e-46	7	Hnrnpdl
	2.60388e-50	0.250678	1	0.998	4.68255e-46	7	Hsp90ab1
	2.9271e-50	0.269705	0.797	0.629	5.2638e-46	7	Dnaja2
	3.68613e-50	0.274328	0.508	0.298	6.62877e-46	7	Tril
	5.18925e-50	0.263218	0.85	0.73	9.33184e-46	7	Nudc
	8.17566e-50	0.267443	0.622	0.419	1.47023e-45	7	Ptpa
	1.05772e-49	0.253895	0.78	0.615	1.9021e-45	7	Adrm1
	2.73348e-49	0.272723	0.715	0.53	4.91562e-45	7	Hnrnph2
	6.56557e-49	0.2531	0.891	0.819	1.18069e-44	7	Nptn
	6.87166e-49	0.286193	0.607	0.418	1.23573e-44	7	Necap2
	7.71334e-49	0.254057	0.801	0.635	1.38709e-44	7	Psmd13
	2.30065e-48	0.262438	0.678	0.477	4.13725e-44	7	Acot7
	3.12268e-48	0.282141	0.76	0.593	5.61552e-44	7	Txndc12
	3.36105e-48	0.291049	0.942	0.871	6.04418e-44	7	Crip2
	1.4644e-47	0.255857	0.956	0.905	2.63342e-43	7	Arhgdia
	2.28074e-47	0.261335	0.953	0.917	4.10145e-43	7	Fundc2
	2.28288e-47	0.259523	0.952	0.909	4.10531e-43	7	Gnb1
	1.50177e-46	0.300913	0.645	0.467	2.70063e-42	7	Vbp1
	2.3584e-46	0.260384	0.651	0.453	4.24111e-42	7	Alyref
	3.29543e-46	0.267457	0.687	0.497	5.92618e-42	7	Vps36
	1.4612e-45	0.260887	0.782	0.63	2.62767e-41	7	Pcnp
	1.65358e-45	0.255054	0.724	0.54	2.97364e-41	7	Syncrip
	3.35526e-45	0.264067	0.744	0.574	6.03377e-41	7	Dek
	4.2675e-45	0.252115	0.644	0.455	7.67425e-41	7	Prpsap1
	8.63076e-45	0.347711	0.872	0.73	1.55207e-40	7	Meox1
	2.38792e-44	0.259046	0.866	0.747	4.29419e-40	7	Psmd2
	3.09107e-44	0.25523	0.689	0.503	5.55867e-40	7	Mesd
	1.26576e-43	0.268418	0.861	0.758	2.27622e-39	7	Tax1bp1
	1.41017e-43	0.250284	0.853	0.744	2.53591e-39	7	Psmc5
	1.61924e-43	0.250508	0.75	0.571	2.91188e-39	7	Dnajc10
	3.29903e-41	0.257734	0.807	0.668	5.93265e-37	7	Snx7
	6.21002e-41	0.253829	0.473	0.29	1.11675e-36	7	Nde1
	9.06836e-41	0.254598	0.934	0.856	1.63076e-36	7	Mxra7
	3.65272e-38	0.280375	0.742	0.586	6.56868e-34	7	Odc1
	5.2438e-38	0.250228	0.845	0.739	9.42992e-34	7	Oxct1
	5.66046e-38	0.265198	0.519	0.348	1.01792e-33	7	H2afx
	4.11386e-37	0.291946	0.434	0.267	7.39795e-33	7	Hmgcs1
	6.1595e-36	0.322204	0.557	0.379	1.10766e-31	7	Ass1
	3.09891e-32	0.307104	0.544	0.37	5.57277e-28	7	Aldh1a2
	6.13957e-32	0.268959	0.481	0.317	1.10408e-27	7	Fdps
	1.98414e-27	0.395699	0.579	0.438	3.56808e-23	7	G0s2
	1.68903e-26	0.28401	0.495	0.346	3.03737e-22	7	Dbp
	1.3289e-25	0.264102	0.398	0.27	2.38976e-21	7	Reep4
	2.37442e-24	0.262612	0.584	0.449	4.26992e-20	7	Nudt4
	1.28907e-23	0.256713	0.703	0.584	2.31814e-19	7	Angptl2
	1.9996e-21	0.284255	0.966	0.935	3.59588e-17	7	Acta2
	2.97823e-19	0.27319	0.462	0.332	5.35575e-15	7	Thbs4
	8.00891e-19	0.314077	0.407	0.293	1.44024e-14	7	Spp1
	0	2.3407	0.969	0.29	0	8	Ifit3
	0	2.0361	0.994	0.529	0	8	Isg15
	0	1.99818	0.906	0.23	0	8	Ifit1
	0	1.68335	0.88	0.191	0	8	Iigp1
	0	1.63368	0.829	0.132	0	8	Ifit3b
	0	1.18133	0.937	0.365	0	8	Rtp4
	0	1.13796	0.462	0.048	0	8	Rsad2
	0	1.13082	0.917	0.364	0	8	Irf7
	0	1.10163	0.756	0.166	0	8	Usp18
	0	1.05907	0.894	0.351	0	8	Phf11d
	0	0.990735	0.924	0.349	0	8	Oasl2
	0	0.985815	0.761	0.175	0	8	Igtp
	0	0.946414	0.865	0.333	0	8	Stat1
	0	0.848467	0.692	0.11	0	8	Gm4951
	0	0.847616	0.7	0.18	0	8	Trim30a
	0	0.764139	0.572	0.093	0	8	Ifi44
	0	0.57064	0.395	0.052	0	8	Cmpk2
	0	0.521231	0.429	0.042	0	8	F830016B08Rik
	5.03024e-302	1.00821	0.9	0.428	9.04587e-298	8	Ifi203
	1.92959e-300	0.794526	0.717	0.219	3.46999e-296	8	Gbp7
	4.34286e-296	0.80944	0.895	0.39	7.80977e-292	8	Xaf1
	1.62829e-293	0.715464	0.688	0.195	2.92815e-289	8	Gbp3
	7.18346e-293	0.742729	0.553	0.123	1.2918e-288	8	Ifi47
	3.03535e-278	0.700103	0.702	0.217	5.45846e-274	8	Rnf213
	3.04192e-265	0.939362	0.87	0.409	5.47029e-261	8	Mndal
	2.75435e-260	0.949612	0.8	0.329	4.95316e-256	8	Irgm1
	4.83092e-254	0.410937	0.429	0.081	8.68744e-250	8	Slfn8
	1.92692e-252	0.507737	0.397	0.071	3.46517e-248	8	Phf11b
	4.14411e-252	0.782371	0.82	0.352	7.45234e-248	8	Sp100
	3.27725e-241	0.762824	0.882	0.46	5.89348e-237	8	Ifi35
	5.31032e-235	0.404624	0.294	0.041	9.54956e-231	8	Oasl1
	2.03084e-233	0.403827	0.457	0.098	3.65207e-229	8	Dhx58
	1.07522e-228	0.980419	0.992	0.872	1.93357e-224	8	Bst2
	8.68248e-228	0.703509	0.723	0.285	1.56137e-223	8	Tor3a
	3.90991e-221	0.666646	0.667	0.235	7.03119e-217	8	Sp110
	1.98316e-211	0.445775	0.467	0.112	3.56632e-207	8	Irgm2
	1.46934e-202	0.586835	0.563	0.173	2.64231e-198	8	Ifih1
	2.88229e-202	0.435494	0.474	0.119	5.18322e-198	8	Herc6
	4.38335e-199	0.497778	0.588	0.184	7.88258e-195	8	Stat2
	1.07892e-197	0.569525	0.681	0.255	1.94022e-193	8	Eif2ak2
	5.16774e-196	0.975911	0.697	0.288	9.29315e-192	8	Gbp2
	7.84991e-194	0.422909	0.401	0.089	1.41165e-189	8	Oas1a
	2.59624e-193	0.596287	0.558	0.168	4.66882e-189	8	Zbp1
	1.03748e-191	0.561487	0.635	0.222	1.8657e-187	8	Tap1
	7.09746e-181	0.480621	0.569	0.184	1.27634e-176	8	Parp9
	4.1637e-180	0.363795	0.387	0.087	7.48759e-176	8	Ddx60
	4.24562e-171	0.404695	0.479	0.136	7.6349e-167	8	Dtx3l
	1.50938e-170	0.420381	0.438	0.117	2.71431e-166	8	Parp14
	6.70277e-169	0.606372	1	0.999	1.20536e-164	8	Ifitm3
	2.78513e-164	0.351462	0.36	0.083	5.0085e-160	8	Trim30d
	5.47393e-162	0.743107	0.864	0.515	9.84377e-158	8	Psmb8
	2.14739e-157	0.476058	0.625	0.241	3.86165e-153	8	Ddx58
	1.78037e-147	0.481184	0.549	0.2	3.20164e-143	8	Samd9l
	3.17268e-146	0.595072	0.79	0.423	5.70544e-142	8	Slfn5
	1.46522e-143	0.673912	0.736	0.363	2.63491e-139	8	Plscr2
	2.27592e-140	0.597502	0.667	0.316	4.09279e-136	8	Ifi211
	2.9571e-139	0.730115	0.846	0.585	5.31775e-135	8	H2-T22
	6.28239e-126	0.740278	0.977	0.876	1.12976e-121	8	Ly6e
	1.06401e-125	0.297057	0.314	0.076	1.9134e-121	8	Slfn9
	5.09536e-117	0.569642	0.844	0.557	9.16299e-113	8	Lgals9
	3.0897e-115	0.441048	0.551	0.225	5.5562e-111	8	Psmb9
	7.02298e-113	0.541018	0.584	0.254	1.26294e-108	8	Ifi204
	7.34129e-112	0.506705	0.721	0.393	1.32018e-107	8	Ube2l6
	1.30878e-111	0.275589	0.307	0.081	2.35358e-107	8	Tlr3
	1.29015e-105	0.533437	0.633	0.329	2.32008e-101	8	Isg20
	1.49752e-101	0.489348	0.593	0.289	2.693e-97	8	Samhd1
	2.74175e-100	0.329643	0.421	0.147	4.9305e-96	8	Apol9a
	3.81988e-100	0.407641	0.514	0.224	6.8693e-96	8	Parp12
	2.62631e-96	0.457297	0.811	0.545	4.72289e-92	8	Tor1aip2
	1.18813e-92	0.37288	0.996	0.966	2.13662e-88	8	Shisa5
	1.86475e-90	0.285737	0.385	0.137	3.35337e-86	8	Trim25
	7.94537e-90	0.524696	0.293	0.089	1.42882e-85	8	Ifit2
	3.95981e-89	0.457457	0.955	0.834	7.12093e-85	8	Lgals3bp
	1.3254e-88	0.351849	0.458	0.188	2.38346e-84	8	Sp140
	7.45615e-82	0.407546	0.554	0.268	1.34084e-77	8	Ifi205
	1.48145e-81	0.352005	0.437	0.18	2.6641e-77	8	H2-Q4
	2.32733e-81	0.353323	0.418	0.172	4.18523e-77	8	Aftph
	4.23163e-80	0.41933	0.804	0.571	7.60974e-76	8	Tor1aip1
	7.17326e-74	0.500729	0.753	0.517	1.28997e-69	8	Psmb10
	8.57417e-74	0.265305	0.294	0.097	1.54189e-69	8	Ifi207
	2.07473e-71	0.453637	0.821	0.639	3.73099e-67	8	Pnp
	2.21718e-69	0.389561	0.509	0.267	3.98716e-65	8	Daxx
	1.30655e-68	0.347519	0.551	0.296	2.34957e-64	8	Nmi
	2.02436e-67	0.282115	0.558	0.289	3.6404e-63	8	Irf9
	3.88728e-67	0.348379	0.7	0.435	6.9905e-63	8	Ogfr
	2.35997e-66	0.294782	0.527	0.266	4.24394e-62	8	Trim12a
	4.32331e-63	0.355293	0.563	0.314	7.77461e-59	8	Trafd1
	8.22818e-63	0.296645	0.27	0.094	1.47967e-58	8	Slfn2
	1.55524e-59	0.310443	0.507	0.27	2.79679e-55	8	Mitd1
	3.53259e-57	0.697285	0.826	0.64	6.35266e-53	8	Ly6a
	2.01027e-56	0.258307	0.406	0.191	3.61507e-52	8	Mlkl
	5.12574e-56	0.375243	0.712	0.48	9.21762e-52	8	H2-T23
	2.2269e-54	0.373586	0.572	0.347	4.00464e-50	8	Zc3hav1
	1.69217e-52	0.29682	0.526	0.299	3.04303e-48	8	Tap2
	9.67416e-47	0.264187	1	1	1.7397e-42	8	B2m
	4.22365e-46	0.467193	0.434	0.232	7.59539e-42	8	Apod
	2.74647e-45	0.291968	0.922	0.838	4.93897e-41	8	Psme2
	1.63497e-44	0.353152	0.423	0.227	2.94018e-40	8	Socs1
	1.00829e-43	0.365083	0.642	0.434	1.81321e-39	8	Fam46a
	6.22157e-42	0.283087	0.379	0.192	1.11883e-37	8	Xdh
	4.46407e-39	0.274479	0.746	0.556	8.02774e-35	8	Dok1
	7.71104e-39	0.254869	0.941	0.89	1.38668e-34	8	H2-K1
	3.77432e-38	0.522273	0.965	0.916	6.78735e-34	8	Ifi27l2a
	3.58674e-34	0.250154	0.835	0.706	6.45003e-30	8	Psme1
	4.57936e-34	0.275354	0.936	0.897	8.23507e-30	8	Cd47
	5.2368e-34	0.839504	0.569	0.419	9.41734e-30	8	Plac8
	7.03595e-34	0.281939	0.67	0.508	1.26528e-29	8	Aida
	1.15576e-33	0.261502	0.607	0.427	2.0784e-29	8	Gnb4
	4.00761e-32	0.293775	0.966	0.876	7.20688e-28	8	Sfrp1
	1.28427e-30	0.373288	0.886	0.751	2.3095e-26	8	Wisp2
	1.37333e-30	0.258163	0.831	0.674	2.46966e-26	8	Loxl3
	3.51773e-29	0.318344	0.809	0.684	6.32593e-25	8	Vcam1
	6.79766e-29	0.25067	0.658	0.5	1.22242e-24	8	Lysmd2
	1.30905e-28	0.29425	0.703	0.534	2.35407e-24	8	Ms4a4d
	1.63231e-26	0.367787	0.92	0.843	2.93539e-22	8	Sfrp2
	8.0459e-24	0.261557	0.798	0.644	1.44689e-19	8	1500015O10Rik
	2.99557e-15	0.273816	0.544	0.437	5.38694e-11	8	Pycard
	3.42113e-15	0.35453	0.308	0.199	6.15221e-11	8	AW112010
	0	1.72598	0.853	0.239	0	9	Ly6c1
	0	1.29569	0.8	0.144	0	9	Tmem100
	0	1.15171	0.831	0.258	0	9	Scara3
	0	1.13217	0.458	0.035	0	9	Sfrp4
	0	1.10311	0.794	0.234	0	9	Tshz2
	0	0.880006	0.733	0.135	0	9	Pdlim4
	0	0.795525	0.671	0.134	0	9	Lrrn4cl
	0	0.744379	0.653	0.08	0	9	Wt1
	0	0.724376	0.677	0.105	0	9	Emilin2
	0	0.724235	0.457	0.033	0	9	Gdf10
	0	0.690472	0.519	0.062	0	9	Sned1
	0	0.640731	0.556	0.03	0	9	Hoxa5
	0	0.627122	0.556	0.089	0	9	Lgi2
	0	0.623871	0.575	0.083	0	9	Maf
	0	0.506529	0.476	0.045	0	9	Gngt2
	0	0.460754	0.409	0.005	0	9	Gsc
	0	0.390337	0.371	0.012	0	9	Hoxc4
	0	0.386663	0.267	0.018	0	9	Ntrk2
	5.42678e-307	1.73241	0.994	0.637	9.75897e-303	9	Ly6a
[truncated: 1,376 more rows]

## Sheet: (C) CSC
CSC	p_val	avg_logFC	pct.1	pct.2	p_val_adj	cluster	gene
	0	0.93554	0.615	0.239	0	1	Inmt
	0	0.721307	0.981	0.862	0	1	Apoe
	0	0.610208	0.992	0.856	0	1	Dpep1
	0	0.604084	0.899	0.663	0	1	C3
	0	0.594965	0.943	0.831	0	1	Cebpd
	0	0.547175	0.989	0.926	0	1	Junb
	0	0.545581	0.942	0.768	0	1	Lpl
	0	0.502472	0.72	0.425	0	1	Ifi205
	0	0.492531	0.999	0.972	0	1	Gpx3
	0	0.487468	0.602	0.317	0	1	Penk
	0	0.421649	0.727	0.464	0	1	Enpp2
	0	0.351626	0.994	0.929	0	1	Fbln1
	0	0.349197	0.96	0.837	0	1	Mgst1
	0	0.288874	1	0.989	0	1	Serping1
	2.53263e-301	0.35185	0.964	0.878	4.20645e-297	1	Egr1
	3.29594e-290	0.556293	0.935	0.827	5.47423e-286	1	Fos
	2.25804e-278	0.380016	0.755	0.506	3.75037e-274	1	Hsd11b1
	2.62627e-274	0.413435	0.498	0.254	4.36197e-270	1	Nmb
	1.99815e-260	0.272296	0.44	0.208	3.31872e-256	1	Ggt5
	1.14723e-247	0.266874	0.996	0.967	1.90543e-243	1	Igfbp4
	4.76134e-226	0.430697	0.669	0.47	7.90811e-222	1	Zfp36
	1.03943e-225	0.332936	0.849	0.693	1.72638e-221	1	Glul
	4.08917e-221	0.499983	0.746	0.572	6.79171e-217	1	Btg2
	5.10797e-217	0.376765	0.885	0.731	8.48383e-213	1	G0s2
	3.76414e-205	0.571913	0.51	0.311	6.25186e-201	1	Adm
	7.25798e-202	0.294008	0.693	0.493	1.20548e-197	1	C1s1
	1.6115e-200	0.916872	0.514	0.33	2.67655e-196	1	Cxcl14
	9.91882e-191	0.267476	0.731	0.547	1.64742e-186	1	C1ra
	2.2079e-186	0.31588	0.588	0.388	3.6671e-182	1	Srpx
	1.01026e-183	0.267941	0.731	0.543	1.67794e-179	1	Atp1a2
	4.48408e-177	0.351244	0.941	0.883	7.44761e-173	1	Ier2
	6.76711e-170	0.388082	0.465	0.282	1.12395e-165	1	Socs3
	4.41971e-146	0.296464	0.544	0.367	7.3407e-142	1	Osr1
	2.34591e-116	0.382284	0.416	0.265	3.89632e-112	1	Cxcl1
	7.79264e-108	0.321482	0.774	0.688	1.29428e-103	1	Cebpb
	1.47876e-95	0.288354	0.503	0.371	2.45608e-91	1	Trf
	2.13632e-91	0.343487	0.811	0.737	3.54821e-87	1	Mt1
	2.69079e-86	0.260011	0.489	0.354	4.46914e-82	1	Fosb
	1.63805e-72	0.250818	0.9	0.856	2.72064e-68	1	Jun
	0	0.761045	0.86	0.503	0	2	Hsd11b1
	0	0.715704	0.996	0.876	0	2	Smoc2
	0	0.561241	0.828	0.466	0	2	Gsta3
	0	0.465582	0.778	0.483	0	2	Prss23
	0	0.464744	0.809	0.494	0	2	Ndufa4l2
	0	0.460833	0.995	0.91	0	2	Sparcl1
	0	0.459973	0.902	0.65	0	2	Lamb1
	0	0.439341	0.943	0.766	0	2	Col4a1
	0	0.435422	0.818	0.551	0	2	Angptl2
	0	0.431349	0.735	0.416	0	2	Heyl
	0	0.427377	0.851	0.585	0	2	Spry1
	0	0.412259	0.914	0.73	0	2	Hspg2
	0	0.409573	0.968	0.839	0	2	Crispld2
	0	0.388406	0.998	0.963	0	2	Htra3
	0	0.382637	0.965	0.844	0	2	Col15a1
	0	0.36851	0.978	0.889	0	2	Tcf4
	2.29487e-294	0.367579	0.597	0.313	3.81155e-290	2	Col5a3
	5.12008e-278	0.358847	0.653	0.376	8.50394e-274	2	Bmp4
	1.90796e-270	0.441128	0.919	0.736	3.16893e-266	2	G0s2
	4.82409e-259	0.397942	0.716	0.463	8.01233e-255	2	Ppp1r14a
	4.49726e-256	0.337814	0.932	0.808	7.4695e-252	2	Ifngr1
	4.57654e-249	0.343907	0.795	0.55	7.60117e-245	2	Col6a3
	1.91493e-229	0.276657	0.965	0.858	3.18051e-225	2	Prelp
	9.28507e-228	0.281293	0.985	0.947	1.54216e-223	2	Lhfp
	4.10683e-219	0.262258	0.459	0.222	6.82104e-215	2	D630003M21Rik
	3.06543e-216	0.270447	0.774	0.484	5.09138e-212	2	Pla1a
	4.44671e-210	0.296526	0.413	0.192	7.38555e-206	2	Msc
	2.42817e-208	0.293385	0.628	0.389	4.03295e-204	2	Jup
	3.95534e-206	0.265936	0.986	0.948	6.56943e-202	2	Col6a1
	5.51668e-200	0.289476	0.935	0.822	9.16265e-196	2	Oaf
	5.20074e-196	0.281438	0.932	0.772	8.63791e-192	2	Ms4a4d
	1.50346e-190	0.272377	0.96	0.902	2.49709e-186	2	Col6a2
	5.25013e-190	0.258771	0.586	0.344	8.71994e-186	2	Tmem204
	5.89321e-183	0.255032	0.997	0.982	9.78803e-179	2	Tuba1a
	7.78488e-179	0.287956	0.72	0.502	1.29299e-174	2	Col4a2
	8.94397e-173	0.280391	0.893	0.767	1.4855e-168	2	Rhoj
	1.66307e-168	0.308002	0.934	0.784	2.76219e-164	2	Lpl
	2.20596e-167	0.308166	0.529	0.312	3.66387e-163	2	Ccnd1
	9.60204e-162	0.267995	0.811	0.637	1.5948e-157	2	Plxdc2
	2.99865e-158	0.250717	0.48	0.271	4.98046e-154	2	2004-09-01
	2.01509e-154	0.256423	0.915	0.794	3.34686e-150	2	Gpm6b
	2.16308e-153	0.268184	0.815	0.661	3.59266e-149	2	Mfge8
	2.59515e-137	0.261935	0.841	0.687	4.31029e-133	2	Aldh1a1
	1.9433e-127	0.257211	0.848	0.708	3.22763e-123	2	Marcks
	9.8843e-88	0.251084	0.79	0.662	1.64168e-83	2	Hes1
	2.16657e-78	0.261524	0.677	0.543	3.59846e-74	2	Spon2
	0	1.26774	0.752	0.255	0	3	Cilp
	0	0.907722	0.963	0.685	0	3	Col8a1
	0	0.759357	0.821	0.426	0	3	Meox1
	0	0.710101	0.858	0.551	0	3	Fibin
	0	0.704719	0.922	0.691	0	3	Mfap4
	0	0.633419	0.941	0.762	0	3	Ckb
	0	0.631628	0.995	0.888	0	3	Cd9
	0	0.624157	0.677	0.343	0	3	Ctgf
	0	0.609461	0.378	0.095	0	3	Crlf1
	0	0.6071	0.405	0.118	0	3	Cst6
	0	0.594492	0.91	0.674	0	3	Aspn
	0	0.547162	0.998	0.974	0	3	Mfap5
	0	0.459779	1	0.996	0	3	Bgn
	0	0.430674	0.94	0.771	0	3	Emp1
	4.64535e-303	0.492907	0.999	0.995	7.71546e-299	3	Crip1
	1.41869e-297	0.473333	0.66	0.36	2.3563e-293	3	Adamtsl2
	7.43865e-294	0.471954	0.818	0.561	1.23549e-289	3	Fxyd5
	6.21779e-290	0.485756	0.65	0.363	1.03271e-285	3	Postn
	2.23326e-289	0.429648	0.885	0.678	3.70922e-285	3	Fxyd6
	3.67985e-285	0.406945	0.985	0.913	6.11187e-281	3	Fbln2
	1.16566e-281	0.328071	0.336	0.103	1.93604e-277	3	Ltbp2
	3.80642e-273	0.383412	0.668	0.379	6.32208e-269	3	F2r
	1.04181e-265	0.324209	1	0.999	1.73035e-261	3	Igfbp7
	1.2205e-263	0.415639	0.544	0.269	2.02713e-259	3	Tgfb1
	2.11377e-257	0.389723	0.988	0.934	3.51077e-253	3	Fstl1
	3.2892e-243	0.390409	0.308	0.098	5.46302e-239	3	Prg4
	1.01794e-237	0.3178	0.992	0.975	1.6907e-233	3	Serpinf1
	1.06915e-235	0.282182	1	0.999	1.77576e-231	3	Vim
	6.16676e-234	0.31209	0.992	0.919	1.02424e-229	3	Pi16
	1.78314e-223	0.391532	0.82	0.612	2.96162e-219	3	Pmepa1
	1.29584e-221	0.504181	0.944	0.831	2.15226e-217	3	Pam
	1.66532e-218	0.275397	1	0.999	2.76593e-214	3	Tmsb4x
	2.80211e-218	0.377668	0.69	0.436	4.65402e-214	3	Vcan
	3.52908e-217	0.374565	0.836	0.644	5.86146e-213	3	Capg
	5.28828e-211	0.300626	0.596	0.333	8.78331e-207	3	Adcy7
	1.57146e-209	0.444847	0.786	0.551	2.61004e-205	3	Nbl1
	1.60948e-208	0.381073	0.951	0.837	2.67318e-204	3	Igfbp6
	2.27091e-208	0.363869	0.531	0.279	3.77175e-204	3	Ackr4
	1.62916e-196	0.331328	0.765	0.54	2.70588e-192	3	Cyb5r3
	8.86392e-195	0.292333	0.337	0.133	1.47221e-190	3	Ass1
	1.40916e-190	0.328015	0.937	0.834	2.34047e-186	3	Tagln2
	2.80138e-186	0.356139	0.877	0.73	4.65281e-182	3	Sh3bgrl3
	1.42193e-179	0.314603	0.608	0.365	2.36168e-175	3	Bhlhe40
	3.61636e-171	0.283677	0.998	0.987	6.00641e-167	3	Ccdc80
	7.55122e-169	0.267949	0.551	0.313	1.25418e-164	3	Lbp
	1.1261e-167	0.300318	0.982	0.935	1.87034e-163	3	Pmp22
	1.1806e-167	0.282331	0.675	0.422	1.96086e-163	3	Itgbl1
	1.50049e-160	0.298945	0.974	0.922	2.49216e-156	3	Rbp1
	1.57253e-160	0.304117	0.581	0.347	2.61181e-156	3	Tgfbi
	2.22345e-155	0.279384	0.724	0.515	3.69293e-151	3	Dpysl3
	2.61118e-153	0.28541	0.926	0.824	4.33691e-149	3	Lmna
	9.94194e-148	0.256701	0.993	0.975	1.65126e-143	3	S100a10
	5.04754e-147	0.262274	0.984	0.946	8.38345e-143	3	Tspo
	1.46337e-143	0.391084	0.329	0.149	2.43052e-139	3	Angptl7
	3.66338e-126	0.254757	0.912	0.801	6.08451e-122	3	Ptgis
	1.65011e-116	0.272929	0.943	0.882	2.74067e-112	3	Islr
	7.20423e-112	0.255081	0.987	0.965	1.19655e-107	3	Anxa2
	1.80756e-109	0.254747	0.9	0.792	3.00217e-105	3	Sod3
	8.51281e-108	0.263115	0.999	0.999	1.41389e-103	3	Cst3
	1.25866e-102	0.251354	0.545	0.363	2.0905e-98	3	Kcnk2
	6.61712e-100	0.290431	0.395	0.23	1.09904e-95	3	Bhlhe41
	4.85571e-96	0.291757	0.804	0.692	8.06486e-92	3	Ugp2
	5.04317e-79	0.413231	0.54	0.369	8.37619e-75	3	Timp1
	1.57381e-65	0.255392	0.787	0.673	2.61395e-61	3	Tppp3
	0	1.18631	0.998	0.92	0	4	Pi16
	0	0.967205	0.882	0.359	0	4	Cd248
	0	0.952628	0.862	0.412	0	4	Gfpt2
	0	0.94579	0.992	0.755	0	4	Ly6a
	0	0.912117	0.782	0.204	0	4	Efhd1
	0	0.900733	0.734	0.253	0	4	Ly6c1
	0	0.898712	0.955	0.559	0	4	Ackr3
	0	0.843088	0.727	0.268	0	4	Tmem100
	0	0.750758	0.995	0.927	0	4	Ifi27l2a
	0	0.748827	0.992	0.839	0	4	Axl
	0	0.73754	0.721	0.283	0	4	Efemp1
	0	0.710268	0.892	0.48	0	4	Pla1a
	0	0.689515	0.946	0.672	0	4	Pcsk6
	0	0.665238	0.891	0.605	0	4	Uap1
	0	0.662261	0.9	0.644	0	4	Klf4
	0	0.658995	0.839	0.471	0	4	Cd55
	0	0.655468	0.817	0.501	0	4	Anxa3
	0	0.642751	0.918	0.635	0	4	Jpt1
	0	0.631477	0.664	0.204	0	4	Lrrn4cl
	0	0.629221	0.984	0.811	0	4	Pcolce2
	0	0.625757	0.963	0.749	0	4	Adamts5
	0	0.624563	0.84	0.483	0	4	Ppp1r14b
	0	0.618216	0.869	0.486	0	4	Scara5
	0	0.613914	0.956	0.808	0	4	Ebf1
	0	0.612239	0.999	0.91	0	4	Clec3b
	0	0.604684	1	0.944	0	4	Cd34
	0	0.596205	0.577	0.21	0	4	Thy1
	0	0.59609	1	0.974	0	4	Mfap5
	0	0.591242	0.779	0.395	0	4	Zfp385a
	0	0.588325	0.929	0.723	0	4	Fbn1
	0	0.578007	0.561	0.169	0	4	Sema3c
	0	0.564608	0.95	0.733	0	4	Uqcc2
	0	0.530456	0.746	0.454	0	4	Ugdh
	0	0.525205	0.512	0.137	0	4	Basp1
	0	0.516995	0.608	0.191	0	4	Emilin2
	0	0.480412	0.721	0.332	0	4	Lims2
	0	0.479346	0.998	0.976	0	4	Timp2
	0	0.464702	0.982	0.882	0	4	Serpinb6a
	0	0.453504	0.77	0.45	0	4	Dbn1
	0	0.452627	0.463	0.152	0	4	Mustn1
	0	0.439655	0.987	0.897	0	4	Anxa1
	0	0.396549	0.437	0.101	0	4	Limch1
	0	0.391286	0.499	0.164	0	4	Adgrd1
	0	0.376477	0.282	0.047	0	4	Stmn4
	0	0.376384	0.283	0.061	0	4	Dact2
	0	0.358355	1	0.999	0	4	S100a6
	0	0.350369	0.418	0.134	0	4	Ret
	0	0.347713	0.345	0.065	0	4	Cadm3
	0	0.328113	0.395	0.115	0	4	Adamtsl3
	0	0.291511	0.277	0.035	0	4	Dpp4
	0	0.273976	0.257	0.051	0	4	Car8
	5.79205e-298	0.325417	0.484	0.188	9.62001e-294	4	1700019D03Rik
	7.05681e-292	0.443195	0.999	0.994	1.17207e-287	4	Actg1
	7.83674e-292	0.47606	0.826	0.549	1.3016e-287	4	Nbl1
	6.57781e-283	0.43659	0.999	0.995	1.09251e-278	4	Crip1
	2.22646e-281	0.386167	0.965	0.837	3.69792e-277	4	Tnxb
	1.19916e-276	0.521577	0.949	0.84	1.99169e-272	4	Igfbp6
	6.27524e-266	0.374447	0.616	0.314	1.04225e-261	4	Creb5
	3.5794e-264	0.382593	0.75	0.47	5.94502e-260	4	Carhsp1
	4.33349e-260	0.387177	0.99	0.913	7.1975e-256	4	Fbln2
	1.93517e-258	0.358213	0.982	0.859	3.21413e-254	4	Lamc1
	3.48589e-258	0.384818	0.991	0.959	5.78971e-254	4	Emp3
	3.2564e-239	0.365165	0.541	0.267	5.40855e-235	4	Metrnl
	2.03322e-233	0.298408	0.994	0.964	3.37697e-229	4	Anxa2
	8.71967e-228	0.378776	0.771	0.528	1.44825e-223	4	Zyx
	9.49817e-227	0.372879	0.795	0.554	1.57755e-222	4	Ahnak2
	4.94576e-226	0.28902	0.999	0.985	8.21441e-222	4	Dpt
	1.28755e-223	0.391566	0.965	0.879	2.13848e-219	4	Islr
	1.32748e-223	0.46412	0.482	0.227	2.20482e-219	4	Htra4
	2.43678e-220	0.394031	0.665	0.382	4.04726e-216	4	Pgf
	1.92201e-218	0.336771	0.995	0.975	3.19227e-214	4	S100a10
	3.03659e-218	0.346247	0.863	0.645	5.04347e-214	4	Qpct
	1.88859e-215	0.316794	0.984	0.931	3.13675e-211	4	Cavin3
	7.60174e-211	0.312278	0.377	0.15	1.26257e-206	4	D630033O11Rik
	1.61971e-209	0.329758	0.988	0.946	2.69017e-205	4	Crip2
	3.69953e-208	0.339053	0.988	0.939	6.14455e-204	4	Ecm1
	2.03435e-207	0.307062	0.512	0.255	3.37885e-203	4	Tshz1
	6.84926e-204	0.329688	0.949	0.826	1.13759e-199	4	Oaf
	1.01448e-203	0.352799	0.862	0.667	1.68494e-199	4	Fhl1
	1.51105e-203	0.300113	0.994	0.934	2.50971e-199	4	Fstl1
	8.06197e-201	0.288473	0.508	0.254	1.33901e-196	4	Slco3a1
	7.60528e-191	0.335323	0.56	0.307	1.26316e-186	4	Thbd
	8.59011e-189	0.332617	0.933	0.812	1.42673e-184	4	Ramp2
	1.70041e-188	0.28658	0.959	0.848	2.82421e-184	4	Ddah2
	2.18385e-188	0.371679	0.946	0.836	3.62715e-184	4	Plpp3
	4.32248e-186	0.437541	0.572	0.313	7.1792e-182	4	Myoc
	4.78478e-180	0.287596	0.604	0.36	7.94704e-176	4	Triobp
	1.41972e-179	0.291237	0.974	0.909	2.35801e-175	4	Gapdh
	1.98185e-179	0.362564	0.861	0.685	3.29165e-175	4	Ugp2
	2.19367e-176	0.300807	0.622	0.37	3.64346e-172	4	Loxl2
	1.03023e-175	0.389362	0.869	0.662	1.7111e-171	4	Tppp3
	4.83133e-175	0.297362	0.998	0.994	8.02436e-171	4	S100a11
	5.31538e-175	0.352564	0.903	0.746	8.82831e-171	4	Selenbp1
	1.84614e-173	0.302947	0.632	0.391	3.06625e-169	4	Ablim1
	1.22308e-172	0.306611	0.713	0.492	2.03142e-168	4	Ccnd3
	9.87694e-171	0.325785	0.559	0.318	1.64046e-166	4	Hs3st1
	3.69758e-168	0.303274	0.953	0.87	6.14132e-164	4	Ahnak
	9.47062e-159	0.292629	0.687	0.467	1.57297e-154	4	Trip10
	2.64577e-158	0.28586	0.907	0.794	4.39437e-154	4	S100a13
	5.31611e-157	0.300958	0.862	0.688	8.82953e-153	4	Lsp1
	1.23419e-156	0.332965	0.534	0.303	2.04986e-152	4	Ces1d
	5.76832e-156	0.301063	0.596	0.367	9.5806e-152	4	Gas7
	4.08197e-154	0.321104	0.697	0.483	6.77974e-150	4	Tubb6
	4.61576e-154	0.283533	0.793	0.588	7.66632e-150	4	Vat1
	5.85616e-152	0.252732	0.986	0.946	9.72649e-148	4	Tspo
	1.08624e-150	0.279407	0.857	0.696	1.80413e-146	4	Rap1a
	3.0015e-150	0.259963	0.521	0.3	4.98518e-146	4	Tek
	2.41351e-143	0.268503	0.547	0.323	4.00861e-139	4	Fndc1
	2.42574e-142	0.259627	0.637	0.415	4.02892e-138	4	Man1a
	2.78661e-141	0.257259	0.945	0.862	4.62828e-137	4	Cd47
	1.05256e-136	0.294889	0.922	0.826	1.7482e-132	4	Rhoc
	4.17971e-136	0.269939	0.981	0.951	6.94209e-132	4	Calm1
	1.25673e-127	0.290675	0.686	0.498	2.08731e-123	4	Klf3
	8.90774e-123	0.265105	0.956	0.861	1.47949e-118	4	Nid1
	5.13362e-119	0.25389	0.765	0.592	8.52643e-115	4	Cavin1
	1.95141e-115	0.259852	0.79	0.626	3.2411e-111	4	Ybx3
	1.30771e-108	0.255558	0.928	0.815	2.17198e-104	4	Camk2n1
	1.82151e-64	0.267149	0.861	0.754	3.02535e-60	4	Klf2
	0	1.77287	0.478	0.097	0	5	Igfbp3
	0	1.19567	0.992	0.882	0	5	Apoe
	0	1.00164	0.793	0.265	0	5	Fgl2
	0	0.798502	0.964	0.772	0	5	Timp3
	0	0.633735	0.525	0.181	0	5	Cdc42ep3
	0	0.588686	0.63	0.22	0	5	Pdlim3
	0	0.581528	0.997	0.94	0	5	Fbln1
	0	0.557087	0.578	0.166	0	5	Cpe
	0	0.515653	1	1	0	5	Gsn
	6.69568e-302	0.406462	0.491	0.154	1.11209e-297	5	Dkk3
	4.19996e-265	0.655374	0.998	0.977	6.97572e-261	5	Mgp
	5.0393e-253	0.435374	0.561	0.226	8.36978e-249	5	Vit
	1.0366e-220	0.428343	0.997	0.961	1.72169e-216	5	Cfh
	4.1428e-220	0.709201	0.818	0.613	6.88077e-216	5	Gstm5
	2.58955e-203	0.394019	0.597	0.287	4.30098e-199	5	Olfml2b
	2.6359e-202	0.517228	0.453	0.18	4.37796e-198	5	Id1
	1.59575e-161	0.343524	1	0.999	2.65038e-157	5	Cst3
	1.02054e-151	0.580363	0.881	0.744	1.69502e-147	5	Id3
	2.00477e-141	0.288782	0.364	0.148	3.32972e-137	5	Gng8
	2.26786e-130	0.329706	0.607	0.359	3.7667e-126	5	Kazald1
	2.06795e-129	0.418927	0.63	0.416	3.43465e-125	5	Tbx20
	5.37001e-126	0.3002	0.287	0.104	8.91906e-122	5	Fst
	6.42895e-117	0.400421	0.703	0.516	1.06778e-112	5	Csrp1
	9.45129e-110	0.28788	0.339	0.147	1.56976e-105	5	Ccl19
	1.95181e-103	0.366286	0.705	0.498	3.24176e-99	5	Nr4a1
	6.0228e-103	0.461781	0.711	0.512	1.00033e-98	5	Id2
	1.26447e-102	0.287143	0.529	0.315	2.10016e-98	5	Slc16a2
	1.13311e-100	0.351225	0.378	0.183	1.88198e-96	5	Myl9
	7.7704e-96	0.326882	0.98	0.938	1.29059e-91	5	Junb
	1.6653e-94	0.331956	0.91	0.82	2.7659e-90	5	Tcf21
	4.45098e-86	0.271783	0.97	0.893	7.39263e-82	5	Egr1
	1.62706e-84	0.269717	0.639	0.44	2.70239e-80	5	Pdgfrl
	3.68648e-83	0.335111	0.938	0.846	6.12287e-79	5	Fos
	9.91116e-82	0.287894	0.882	0.784	1.64614e-77	5	Il11ra1
	1.10064e-75	0.382085	0.407	0.231	1.82805e-71	5	Gadd45g
	1.17677e-67	0.304207	0.833	0.709	1.9545e-63	5	Gas6
	1.51323e-64	0.268083	0.94	0.901	2.51332e-60	5	Dbi
	1.18992e-61	0.270376	0.944	0.893	1.97633e-57	5	Ier2
	3.74241e-60	0.329085	0.789	0.676	6.21576e-56	5	Tm4sf1
	2.90027e-55	0.297862	0.647	0.508	4.81705e-51	5	Zfp36
	3.83707e-54	0.279582	0.523	0.367	6.373e-50	5	Fmo2
	5.69014e-53	0.278449	0.386	0.235	9.45075e-49	5	Tmem176b
	2.10747e-41	0.274987	0.72	0.605	3.50029e-37	5	Btg2
	4.10136e-22	0.306122	0.429	0.341	6.81195e-18	5	Myoc
	4.13331e-20	0.295682	0.476	0.397	6.86501e-16	5	Trf
	0	0.897304	0.585	0.045	0	6	Gdf10
	0	0.887132	1	0.999	0	6	Cst3
	0	0.686365	0.477	0.091	0	6	Rbp4
	0	0.436336	0.287	0.017	0	6	Ccdc3
	0	0.339765	0.297	0.015	0	6	Tspan11
	1.0827e-239	1.14949	0.616	0.227	1.79825e-235	6	Gadd45g
	8.83377e-239	0.341763	0.352	0.07	1.4672e-234	6	C7
	1.28405e-236	0.395317	0.425	0.1	2.13267e-232	6	Gpc3
	1.80318e-231	0.670623	0.961	0.784	2.9949e-227	6	Il11ra1
	8.82668e-230	0.488087	0.471	0.129	1.46602e-225	6	Steap4
	1.21463e-225	0.52908	0.998	0.958	2.01739e-221	6	Cygb
	1.02932e-219	0.555363	1	0.962	1.7096e-215	6	Cfh
	1.67036e-212	0.407725	0.464	0.131	2.7743e-208	6	Meox2
	2.87273e-210	0.808978	0.477	0.143	4.77131e-206	6	C4b
	2.54431e-203	0.374936	0.323	0.067	4.22584e-199	6	Kcne4
	1.05863e-196	0.497657	0.708	0.292	1.75828e-192	6	Fgl2
	7.43152e-196	1.18765	0.685	0.315	1.2343e-191	6	Inmt
	2.77893e-185	0.82752	0.711	0.373	4.61552e-181	6	F3
	1.53937e-184	0.504635	0.999	0.977	2.55675e-180	6	Serpinf1
	1.3894e-175	0.846339	0.927	0.717	2.30766e-171	6	Mfap4
	7.31694e-175	0.295026	0.365	0.094	1.21527e-170	6	Fgf7
	3.98212e-173	0.378984	0.537	0.185	6.6139e-169	6	Cpe
	3.27945e-169	0.860646	0.926	0.71	5.44684e-165	6	Gas6
	7.95036e-157	0.477574	0.488	0.18	1.32047e-152	6	Sult5a1
	1.75262e-154	0.394445	0.999	0.991	2.91093e-150	6	Serping1
	1.65474e-152	0.565911	0.913	0.664	2.74836e-148	6	Igf1
	2.64664e-150	0.399658	0.49	0.18	4.3958e-146	6	Cd200
	1.17442e-149	0.393833	1	0.999	1.9506e-145	6	Igfbp7
	1.36497e-145	0.482158	0.603	0.287	2.26709e-141	6	Flt3l
	1.28688e-141	0.706503	0.728	0.443	2.13738e-137	6	Cxcl12
	3.20427e-139	0.520758	0.577	0.26	5.32197e-135	6	Il33
	2.43162e-136	0.302614	1	1	4.03868e-132	6	Fth1
	4.02783e-136	0.296249	1	0.994	6.68982e-132	6	Col1a2
	9.77017e-129	0.623211	0.797	0.516	1.62273e-124	6	Id2
	1.31248e-126	0.687391	0.869	0.659	2.1799e-122	6	Phlda1
	2.28459e-124	0.393826	0.994	0.97	3.79448e-120	6	Selenop
	6.97327e-124	0.334636	0.451	0.174	1.15819e-119	6	Nr2f2
	5.15594e-120	0.429153	0.667	0.369	8.56349e-116	6	Podn
	6.89978e-120	0.440481	0.548	0.255	1.14598e-115	6	Serpina3n
	7.35183e-119	0.329702	0.999	0.996	1.22106e-114	6	Col3a1
	7.79541e-119	0.369133	0.386	0.136	1.29474e-114	6	Clec11a
	4.81249e-117	0.365188	0.584	0.283	7.99306e-113	6	Lsamp
	3.08792e-115	0.459841	0.748	0.446	5.12873e-111	6	Itgbl1
	5.41538e-109	0.490247	0.648	0.367	8.9944e-105	6	Fmo2
	1.869e-108	0.492809	1	0.977	3.10422e-104	6	Mgp
	8.70117e-101	0.343673	0.341	0.119	1.44518e-96	6	Prg4
	4.49808e-98	0.417963	0.779	0.53	7.47086e-94	6	C1s1
	6.6728e-97	0.430504	0.747	0.52	1.10829e-92	6	Pid1
	3.79758e-96	0.397814	0.65	0.369	6.3074e-92	6	Tgfbi
	7.50275e-91	0.397431	0.856	0.692	1.24613e-86	6	Matn2
	1.17958e-89	0.527487	0.591	0.319	1.95916e-85	6	Cilp
	1.31089e-82	0.365963	0.256	0.083	2.17726e-78	6	Comp
	3.32147e-82	0.531821	0.383	0.166	5.51663e-78	6	Angptl7
	1.1543e-80	0.461294	0.733	0.505	1.91718e-76	6	Nr4a1
	3.73858e-79	0.473694	0.652	0.427	6.20941e-75	6	Srpx
	6.66337e-79	0.317855	0.98	0.928	1.10672e-74	6	Cd302
	2.2138e-78	0.407448	0.643	0.399	3.6769e-74	6	Osr1
	2.25162e-72	0.387891	0.926	0.747	3.73971e-68	6	Id3
	1.31068e-71	0.329938	0.353	0.154	2.1769e-67	6	Ccl19
	5.78063e-71	0.427826	0.513	0.277	9.60105e-67	6	Apod
	8.00853e-71	0.382122	0.874	0.725	1.33014e-66	6	Glul
	4.71994e-70	0.321401	0.647	0.415	7.83934e-66	6	Gxylt2
	1.7293e-65	0.282978	0.992	0.943	2.87219e-61	6	Fbln1
	2.85586e-64	0.281051	0.401	0.201	4.7433e-60	6	Fblim1
	8.99729e-63	0.299657	0.864	0.725	1.49436e-58	6	Adamts2
	6.9126e-62	0.323489	0.388	0.192	1.14811e-57	6	Fhl2
	1.11534e-61	0.259135	0.523	0.306	1.85246e-57	6	Bace2
	3.80657e-61	0.678005	0.283	0.118	6.32234e-57	6	Mmp3
	9.1695e-61	0.286947	0.658	0.444	1.52296e-56	6	Nrp1
	1.59827e-58	0.369894	0.805	0.647	2.65457e-54	6	Sfrp1
	1.93886e-58	0.410955	0.844	0.702	3.22026e-54	6	Cebpb
	2.75947e-57	0.332715	0.587	0.381	4.5832e-53	6	Kcnk2
	4.96517e-57	0.310352	0.756	0.585	8.24665e-53	6	C1ra
	1.46105e-55	0.263207	0.93	0.82	2.42666e-51	6	Nfib
	9.45873e-52	0.264983	1	0.999	1.571e-47	6	Sparc
	3.86777e-51	0.348891	0.596	0.397	6.42397e-47	6	Adamtsl2
	8.66925e-51	0.390124	0.585	0.411	1.43988e-46	6	Errfi1
	8.70073e-51	0.262846	0.784	0.599	1.4451e-46	6	Gstm2
	5.98377e-49	0.300543	0.552	0.37	9.93845e-45	6	Cxcl16
	8.10273e-49	0.34234	0.578	0.378	1.34578e-44	6	Penk
	1.33047e-47	0.27653	0.871	0.737	2.20978e-43	6	Plpp1
	2.03183e-47	0.508147	0.288	0.136	3.37467e-43	6	Ccl11
	2.46796e-44	0.785955	0.581	0.436	4.09904e-40	6	Wisp2
	3.90944e-42	0.423	0.558	0.386	6.49319e-38	6	Ctgf
	2.99222e-41	0.359833	0.935	0.888	4.96978e-37	6	Dpep1
	1.66301e-38	0.316973	0.928	0.85	2.7621e-34	6	Fos
	7.50948e-37	0.270891	0.513	0.322	1.24725e-32	6	Tmem100
	3.02114e-36	0.261502	0.829	0.73	5.01782e-32	6	Zfp36l1
	3.7446e-36	0.31371	0.985	0.979	6.21941e-32	6	Gpx3
	1.55253e-34	0.279516	0.396	0.241	2.5786e-30	6	Tmem176b
	1.90496e-32	0.300056	0.977	0.94	3.16396e-28	6	Junb
	1.05057e-29	0.287765	0.736	0.609	1.74489e-25	6	Btg2
	3.30072e-28	0.406306	0.828	0.752	5.48216e-24	6	Mt1
	8.14263e-28	0.368743	0.803	0.726	1.35241e-23	6	Cyr61
	3.78997e-16	0.283711	0.457	0.359	6.29476e-12	6	Mt2
	4.34468e-06	0.264327	0.716	0.677	0.0721608	6	Eln
	0	2.83328	0.996	0.378	0	7	Postn
	0	2.67977	0.924	0.108	0	7	Cthrc1
	0	2.43843	0.895	0.2	0	7	Ptn
	0	2.25948	0.979	0.337	0	7	Fn1
	0	2.22499	1	0.991	0	7	Col1a1
	0	2.09619	0.802	0.275	0	7	Sfrp2
	0	1.96923	1	0.996	0	7	Col3a1
	0	1.91632	1	0.994	0	7	Col1a2
	0	1.73654	0.694	0.047	0	7	Ddah1
	0	1.59691	0.972	0.468	0	7	Csrp2
	0	1.53154	0.939	0.368	0	7	Timp1
	0	1.52072	1	0.999	0	7	Sparc
	0	1.41272	0.997	0.663	0	7	Col5a2
	0	1.367	0.906	0.137	0	7	Lox
	0	1.32698	0.99	0.714	0	7	Mfap4
	0	1.26022	0.527	0.087	0	7	Tagln
	0	1.21816	0.346	0.05	0	7	Thbs4
	0	1.15288	0.617	0.03	0	7	Tnc
	0	1.1496	0.902	0.471	0	7	Mfap2
	0	1.10295	0.797	0.255	0	7	Mdk
	0	1.07134	0.736	0.057	0	7	Palld
	0	1.03641	0.941	0.324	0	7	C1qtnf6
	0	1.03181	0.975	0.581	0	7	Col5a1
	0	0.987624	0.928	0.422	0	7	Col14a1
	0	0.979699	1	0.939	0	7	Fstl1
	0	0.954519	0.806	0.204	0	7	Actn1
	0	0.936815	0.989	0.638	0	7	Ppic
	0	0.895931	0.758	0.077	0	7	Marcksl1
	0	0.886965	0.594	0.063	0	7	1500015O10Rik
	0	0.873811	0.27	0.027	0	7	Plac8
	0	0.834852	0.687	0.112	0	7	Ltbp2
	0	0.832216	0.837	0.332	0	7	Tgfb3
	0	0.793194	0.719	0.225	0	7	Tmem176b
	0	0.775449	1	0.995	0	7	Serpinh1
	0	0.762978	0.621	0.159	0	7	Gucy1a1
	0	0.732575	0.764	0.277	0	7	Tpm2
	0	0.705988	0.806	0.235	0	7	Col16a1
	0	0.693739	0.989	0.832	0	7	Pabpc1
	0	0.687582	0.861	0.333	0	7	Serf1
	0	0.668766	0.668	0.149	0	7	Nrep
	0	0.663356	1	1	0	7	Rpl41
	0	0.573277	0.461	0.013	0	7	Wisp1
	0	0.567601	1	0.999	0	7	Serf2
	0	0.567267	0.369	0.034	0	7	Fmod
	0	0.553426	0.543	0.014	0	7	P4ha3
	0	0.550397	0.646	0.117	0	7	Tcea3
	0	0.541723	1	1	0	7	Rplp0
	0	0.535934	0.603	0.145	0	7	Fkbp11
	0	0.533686	0.999	1	0	7	Rpl15
	0	0.52593	0.562	0.084	0	7	Ttll5
	0	0.50531	0.451	0.03	0	7	Col8a2
	0	0.493796	0.611	0.122	0	7	Synpo
	0	0.479893	0.491	0.023	0	7	Cdh2
	0	0.470903	0.528	0.083	0	7	Phldb2
	0	0.447477	0.386	0.018	0	7	Runx1
	0	0.443397	0.432	0.028	0	7	Fbn2
	0	0.422244	0.391	0.055	0	7	Nr4a2
	0	0.413524	0.387	0.035	0	7	Col12a1
	0	0.388849	0.41	0.051	0	7	Nt5dc2
	0	0.381614	0.39	0.032	0	7	Cpz
	0	0.376214	0.358	0.05	0	7	Ncam1
	0	0.310945	0.406	0.066	0	7	Pdzrn3
	0	0.305094	0.354	0.045	0	7	Rai14
	0	0.284176	0.29	0.024	0	7	Ecscr
	0	0.255021	0.269	0.025	0	7	Piezo2
	0	0.252926	0.273	0.01	0	7	Adam12
	1.00563e-307	0.617254	0.998	0.998	1.67026e-303	7	Rpl39
	1.96104e-306	0.760564	0.97	0.72	3.25709e-302	7	Adamts2
	4.29107e-306	1.30424	0.785	0.31	7.12703e-302	7	Cilp
	2.67036e-303	0.863095	0.701	0.234	4.4352e-299	7	Pdlim3
	9.50511e-303	0.603905	0.556	0.138	1.5787e-298	7	Gadd45b
	1.73072e-302	0.669878	0.984	0.831	2.87455e-298	7	Eef1b2
	6.2976e-299	0.312227	0.364	0.057	1.04597e-294	7	Pdgfa
	8.52003e-288	0.388332	0.523	0.123	1.41509e-283	7	Pdia5
	2.03025e-282	1.05998	0.5	0.12	3.37205e-278	7	Acta2
	3.50162e-281	0.547884	0.999	0.973	5.81584e-277	7	Ppib
	3.18642e-280	0.293341	0.369	0.062	5.29232e-276	7	Cdh11
	7.51213e-280	0.343053	0.432	0.086	1.24769e-275	7	Dnm3os
	9.89314e-280	0.523661	0.656	0.208	1.64315e-275	7	Plod2
	1.07413e-275	0.477593	0.999	1	1.78402e-271	7	Rplp1
	1.29291e-274	0.33307	0.425	0.085	2.1474e-270	7	Pycr1
	7.32411e-271	0.552478	0.533	0.14	1.21646e-266	7	Rasl11b
	4.03162e-268	0.372403	0.452	0.098	6.69612e-264	7	Mpp6
	7.24146e-267	0.758094	0.819	0.407	1.20273e-262	7	Gxylt2
	1.05674e-263	0.671458	0.536	0.14	1.75513e-259	7	Tmem176a
	2.76663e-261	0.397631	0.999	1	4.5951e-257	7	Rps7
	4.3268e-261	0.382713	0.28	0.039	7.18639e-257	7	Ada
	7.41783e-259	0.315985	0.435	0.093	1.23203e-254	7	Cryzl2
	1.76663e-258	0.393933	0.526	0.136	2.9342e-254	7	Tns3
	4.4513e-255	0.25299	0.254	0.032	7.39317e-251	7	Fbln7
	6.88271e-253	0.415107	0.542	0.149	1.14315e-248	7	4931406P16Rik
	8.98974e-249	0.675158	0.974	0.74	1.49311e-244	7	Fbn1
	3.93673e-246	0.701845	0.731	0.309	6.53852e-242	7	Lbh
	8.4923e-245	0.361036	0.46	0.109	1.41049e-240	7	Lhfpl2
	1.24002e-243	0.386761	0.582	0.164	2.05955e-239	7	Dkk3
	3.64663e-241	0.903934	0.965	0.698	6.05668e-237	7	Aspn
	3.7541e-241	0.738012	0.462	0.118	6.23519e-237	7	Rflnb
	1.55955e-239	0.487388	0.499	0.131	2.59025e-235	7	Clec11a
	1.68497e-239	1.0152	0.895	0.643	2.79857e-235	7	Sfrp1
	1.88995e-239	0.587678	0.934	0.678	3.13903e-235	7	Ssr2
	3.6711e-239	0.430848	0.517	0.143	6.09732e-235	7	Enpp1
	8.46386e-238	0.608663	0.912	0.62	1.40576e-233	7	1810058I24Rik
	2.05706e-237	0.285098	0.397	0.083	3.41658e-233	7	Neo1
	1.01283e-236	0.488467	1	0.999	1.68221e-232	7	Lgals1
	2.53382e-233	0.583166	0.988	0.921	4.20842e-229	7	Rcn3
	3.00728e-233	0.469309	0.998	0.995	4.9948e-229	7	Rpsa
	3.35295e-230	0.495043	0.999	0.997	5.56891e-226	7	Bgn
	1.68471e-227	0.337054	0.429	0.101	2.79814e-223	7	Gm15867
	2.72639e-227	0.30196	0.408	0.091	4.52827e-223	7	Gsto1
	4.57886e-227	0.388938	1	1	7.60503e-223	7	Rps8
	1.28653e-224	0.611746	0.854	0.5	2.1368e-220	7	Ckap4
	3.69454e-224	0.569444	0.655	0.246	6.13626e-220	7	Sox4
	9.07114e-224	0.498869	0.996	0.959	1.50663e-219	7	Rpl12
	7.01943e-221	0.470158	0.995	0.983	1.16586e-216	7	Sec61g
	1.70326e-219	0.665741	0.986	0.927	2.82895e-215	7	Rbp1
	5.11094e-218	0.397819	0.998	0.999	8.48876e-214	7	Rpl23
	1.22828e-216	0.48097	0.997	0.991	2.04005e-212	7	Rps12
	7.88801e-215	0.312658	0.435	0.107	1.31012e-210	7	Sdc1
	1.82934e-213	0.391018	0.999	0.997	3.03836e-209	7	Rpl10a
	1.84928e-212	0.411749	0.999	0.997	3.07147e-208	7	Rps20
	4.47189e-212	0.660481	0.789	0.408	7.42736e-208	7	Mmp14
	4.85585e-212	0.610841	0.874	0.542	8.06508e-208	7	Gm10076
	5.84195e-211	0.434638	0.997	0.985	9.7029e-207	7	Rpl29
	3.62577e-209	0.266678	0.352	0.074	6.02204e-205	7	Vstm4
	2.00901e-207	0.565234	0.879	0.576	3.33677e-203	7	Efemp2
	1.40837e-206	0.566453	0.981	0.857	2.33916e-202	7	Npm1
	6.30037e-205	0.609275	0.729	0.335	1.04643e-200	7	Fndc1
	1.1653e-204	0.456458	0.598	0.215	1.93545e-200	7	Dok1
	8.31875e-204	0.489953	0.612	0.231	1.38166e-199	7	Loxl3
	3.81861e-203	0.365525	0.996	1	6.34234e-199	7	Rps15a
	6.58389e-203	0.291366	0.999	1	1.09352e-198	7	Rpl37a
	1.65232e-201	0.275554	0.368	0.083	2.74434e-197	7	Limd2
	1.86632e-201	0.617066	0.826	0.443	3.09977e-197	7	Itgbl1
	2.15835e-201	0.398893	0.999	1	3.58481e-197	7	Tpt1
	9.21508e-201	0.62118	0.593	0.22	1.53053e-196	7	Tspan6
	1.72424e-200	0.598114	0.964	0.83	2.8638e-196	7	Ctsd
	1.77571e-200	0.541225	0.954	0.73	2.94928e-196	7	Snhg18
	1.97732e-200	0.390556	0.619	0.223	3.28413e-196	7	Cercam
	5.74292e-199	0.514155	0.911	0.603	9.53841e-195	7	P4hb
	3.26062e-198	0.318655	0.999	1	5.41556e-194	7	Rpl32
	3.51411e-197	0.76815	0.956	0.746	5.83659e-193	7	Id3
	1.11692e-195	0.323393	0.326	0.068	1.8551e-191	7	Kcne4
	4.06128e-193	0.343291	0.999	1	6.74538e-189	7	Rps3a1
	1.61931e-192	0.445774	0.995	0.953	2.68952e-188	7	Loxl1
	7.93936e-191	0.384546	0.509	0.16	1.31865e-186	7	Gucy1b1
	8.22646e-191	0.527841	0.888	0.583	1.36633e-186	7	Gpx7
	2.34943e-190	0.581572	0.917	0.715	3.90217e-186	7	Mmp23
	1.30214e-188	0.459086	0.994	0.937	2.16273e-184	7	Rpl13a
	2.01525e-188	0.423012	0.519	0.17	3.34714e-184	7	Col27a1
	3.64853e-188	0.464736	0.999	0.998	6.05985e-184	7	Tmsb10
	2.74505e-187	0.419338	0.525	0.175	4.55926e-183	7	Hif1a
	7.32573e-187	0.391322	0.994	0.976	1.21673e-182	7	Bsg
	1.00649e-185	0.425019	1	0.999	1.67168e-181	7	Igfbp7
	6.26772e-185	0.520315	0.821	0.471	1.04101e-180	7	Chpf
	1.20098e-183	0.387759	0.283	0.056	1.9947e-179	7	Plk2
	2.87384e-182	0.384608	0.577	0.211	4.77317e-178	7	Pxdn
	3.56414e-179	0.250513	0.274	0.052	5.91968e-175	7	Plscr2
	5.66106e-179	0.617633	0.977	0.909	9.40245e-175	7	Col6a2
	9.55849e-179	0.478314	0.732	0.374	1.58757e-174	7	Pld3
	1.95803e-178	0.629533	0.781	0.442	3.25209e-174	7	Pdgfrl
	8.88173e-177	0.404908	0.999	0.989	1.47517e-172	7	Rps26
	2.03047e-175	0.26604	0.291	0.06	3.3724e-171	7	Foxc2
	2.15536e-175	0.471807	0.53	0.184	3.57984e-171	7	Myl9
	2.2025e-175	0.331589	0.998	0.999	3.65813e-171	7	Rpl31
	7.29456e-174	0.495672	0.728	0.37	1.21155e-169	7	Ctsk
	8.1109e-173	0.497098	0.873	0.592	1.34714e-168	7	Maged1
	8.76294e-173	0.38481	0.998	0.986	1.45544e-168	7	Rps10
	1.83315e-172	0.366166	0.995	0.98	3.04468e-168	7	Gabarap
	2.28283e-172	0.423567	0.991	0.938	3.79156e-168	7	Rack1
	3.11698e-172	0.344537	0.441	0.132	5.17698e-168	7	Tyms
	6.78314e-171	0.357238	0.997	0.996	1.12661e-166	7	Rpl28
	1.67543e-167	0.325864	0.998	0.999	2.78272e-163	7	Rps24
	2.40594e-167	0.300341	0.998	1	3.99603e-163	7	Rps27a
	3.06295e-166	0.489393	0.959	0.841	5.08725e-162	7	Rrbp1
	6.73172e-164	0.448572	0.85	0.544	1.11807e-159	7	Erp29
	5.17699e-163	0.561964	0.881	0.625	8.59846e-159	7	Aebp1
	2.08469e-162	0.444989	0.969	0.821	3.46246e-158	7	Vkorc1
	7.08493e-162	0.295211	1	1	1.17674e-157	7	Eef1a1
	8.50566e-160	0.482136	0.968	0.837	1.41271e-155	7	Sec61b
	1.37577e-158	0.433195	0.932	0.729	2.28502e-154	7	Gpx8
	2.38648e-158	0.707629	0.531	0.202	3.96371e-154	7	Gm12840
	3.36506e-158	0.494538	0.936	0.744	5.58904e-154	7	Sh3bgrl3
	4.04221e-155	0.473569	0.973	0.902	6.71371e-151	7	Npc2
	1.13287e-153	0.288467	0.439	0.138	1.88158e-149	7	Gm1673
	1.55572e-153	0.497947	0.824	0.534	2.5839e-149	7	Dpysl3
	2.74561e-153	0.314923	0.997	0.998	4.56018e-149	7	Rps17
	8.86688e-153	0.265052	0.261	0.054	1.4727e-148	7	Stmn1
	4.65686e-152	0.277199	0.445	0.142	7.73458e-148	7	Ctnnbip1
	6.43121e-152	0.398084	0.983	0.882	1.06816e-147	7	Tmed3
	6.89095e-152	0.42455	0.646	0.293	1.14452e-147	7	Fscn1
	1.51232e-150	0.348122	0.995	0.976	2.51181e-146	7	Rpl22
	4.29332e-150	0.306858	0.422	0.13	7.13078e-146	7	Tubb2b
	5.72392e-150	0.384549	0.998	0.96	9.50685e-146	7	Eef1g
	8.54625e-149	0.365123	0.991	0.967	1.41945e-144	7	Rpl27
	9.20594e-149	0.480753	0.829	0.524	1.52902e-144	7	Bmp1
	1.68259e-146	0.390222	0.644	0.293	2.79461e-142	7	Foxp1
	1.95157e-146	0.901417	0.9	0.819	3.24136e-142	7	Meg3
	2.43901e-146	0.706275	0.712	0.379	4.05096e-142	7	Ctgf
	4.75027e-146	0.27582	0.346	0.093	7.88972e-142	7	Cav1
	9.16459e-146	0.260397	0.407	0.124	1.52215e-141	7	Rab31
	9.45326e-146	0.334947	0.428	0.138	1.57009e-141	7	Mical2
	5.13515e-144	0.297713	0.998	0.999	8.52897e-140	7	Rpl7
	1.51286e-143	0.538105	0.896	0.701	2.51271e-139	7	Fxyd6
	1.7041e-143	0.350515	0.59	0.249	2.83034e-139	7	Snhg6
	1.25106e-142	0.261671	0.999	1	2.07789e-138	7	Rps29
	3.06837e-141	0.257562	0.417	0.131	5.09625e-137	7	Plce1
	3.72067e-141	0.577589	0.373	0.112	6.17966e-137	7	Serpine1
	7.85518e-141	0.442626	0.943	0.815	1.30467e-136	7	Tceal9
	9.2756e-141	0.312145	0.333	0.092	1.54058e-136	7	Nkd2
	4.7702e-140	0.263109	0.401	0.124	7.92282e-136	7	Unc5b
	1.05912e-139	0.325875	0.553	0.222	1.75909e-135	7	Ptprs
	1.11376e-139	0.586337	0.396	0.126	1.84984e-135	7	Vegfd
	1.33312e-138	0.337715	0.441	0.152	2.21418e-134	7	Slc1a3
	2.83056e-138	0.392405	0.934	0.74	4.70128e-134	7	Atp5g2
	7.25116e-138	0.398124	0.947	0.804	1.20434e-133	7	Rtraf
	8.20994e-137	0.444038	0.491	0.187	1.36359e-132	7	Fhl2
	6.74485e-136	0.309872	0.999	0.997	1.12025e-131	7	Rpl36a
	7.04625e-136	0.489845	0.894	0.643	1.17031e-131	7	Uba52
	2.07892e-135	0.465175	0.879	0.661	3.45288e-131	7	Hcfc1r1
	2.89792e-134	0.414951	0.953	0.832	4.81315e-130	7	Ssr4
	3.65119e-134	0.275574	0.998	1	6.06426e-130	7	Rpl17
	6.60409e-134	0.496992	0.763	0.486	1.09687e-129	7	Tmem45a
	8.16616e-134	0.279653	1	0.999	1.35632e-129	7	Rplp2
	3.46409e-132	0.411657	0.817	0.532	5.75351e-128	7	Hdlbp
	9.12032e-132	0.375062	0.309	0.081	1.51479e-127	7	Comp
	3.28348e-131	0.41128	0.907	0.67	5.45353e-127	7	Tmem167
	2.1014e-130	0.333238	0.427	0.15	3.49022e-126	7	Rnf149
	2.31033e-129	0.372446	0.651	0.321	3.83723e-125	7	Fkbp10
	1.51253e-127	1.00274	0.839	0.723	2.51216e-123	7	Col8a1
	2.95505e-127	0.380807	0.684	0.361	4.90803e-123	7	Ltbp3
	3.07399e-127	0.260367	1	1	5.10559e-123	7	Rps3
	1.62223e-126	0.353815	0.674	0.348	2.69436e-122	7	Eif4e2
	1.99052e-126	0.31123	0.553	0.234	3.30606e-122	7	Mpzl1
	4.0664e-126	0.561824	0.882	0.678	6.75388e-122	7	Mif
	3.01644e-125	0.336524	0.366	0.116	5.01001e-121	7	Hk2
	2.06704e-124	0.423233	0.905	0.725	3.43314e-120	7	Grn
	2.05141e-123	0.399768	0.821	0.556	3.40718e-119	7	Prelid1
	4.82634e-123	0.258599	0.999	1	8.01607e-119	7	Rps28
	6.63584e-123	0.491377	0.87	0.633	1.10215e-118	7	Pmepa1
	1.33811e-122	0.267952	1	1	2.22247e-118	7	Rpl4
	4.44144e-121	0.526353	0.685	0.412	7.37678e-117	7	Dhrs3
	5.72818e-121	0.319282	0.984	0.917	9.51394e-117	7	Arf5
	9.83937e-121	0.287241	0.997	0.998	1.63422e-116	7	Rpl38
	1.76965e-119	0.631265	0.893	0.793	2.93922e-115	7	Emp1
	8.2837e-119	0.266843	0.481	0.186	1.37584e-114	7	Fzd2
	9.74118e-117	0.261842	0.409	0.144	1.61791e-112	7	Panx1
	3.26298e-114	0.533802	0.994	0.977	5.41948e-110	7	Mfap5
	1.27924e-112	0.311755	0.992	0.956	2.1247e-108	7	Rpl5
	4.19965e-112	0.366471	0.754	0.472	6.9752e-108	7	Surf4
	9.47849e-111	0.362665	0.711	0.427	1.57428e-106	7	Praf2
	1.47821e-110	0.47219	0.817	0.571	2.45516e-106	7	Maged2
	3.41389e-110	0.277807	0.464	0.184	5.67013e-106	7	Sertad4
	9.98928e-109	0.255979	1	1	1.65912e-104	7	Rps2
	1.14938e-107	0.279861	0.998	0.99	1.90901e-103	7	Rps21
	5.153e-107	0.405982	0.889	0.693	8.55862e-103	7	Eva1b
	9.65005e-107	0.29557	0.448	0.179	1.60278e-102	7	Smad7
	5.15392e-106	0.511408	0.508	0.234	8.56014e-102	7	Ier3
	6.73376e-106	0.363624	0.554	0.268	1.11841e-101	7	Nedd9
	7.55294e-106	0.694115	0.705	0.476	1.25447e-101	7	Meox1
	2.41612e-105	0.369432	0.685	0.386	4.01294e-101	7	Tmem119
	3.0335e-105	0.437541	0.977	0.954	5.03835e-101	7	Col6a1
	4.87969e-104	0.341129	0.951	0.8	8.10468e-100	7	Gm11808
	9.43878e-104	0.422829	0.864	0.681	1.56769e-99	7	Cnn3
	2.56453e-102	0.363996	0.598	0.301	4.25943e-98	7	Olfml2b
	9.21547e-102	0.601093	0.812	0.584	1.5306e-97	7	Col6a3
	2.78264e-101	0.293375	0.469	0.19	4.62169e-97	7	Cpe
	9.39641e-100	0.467026	0.908	0.725	1.56065e-95	7	Marcks
	2.83874e-98	0.250281	0.472	0.197	4.71486e-94	7	Il3ra
	8.88333e-98	0.344638	0.901	0.685	1.47543e-93	7	Npdc1
	1.60321e-97	0.322337	0.942	0.808	2.66277e-93	7	Prdx2
	2.11665e-97	0.269115	0.998	0.985	3.51554e-93	7	Rpl7a
	4.46136e-95	0.923327	0.393	0.161	7.40987e-91	7	Isg15
	1.01439e-93	0.344506	0.902	0.735	1.6848e-89	7	Copz2
	1.07998e-93	0.307102	0.998	0.977	1.79374e-89	7	Serpinf1
	1.66769e-93	0.272989	0.532	0.255	2.76987e-89	7	P3h1
	3.32741e-93	0.326428	0.721	0.46	5.5265e-89	7	Crtap
	4.31579e-93	0.32941	0.87	0.668	7.1681e-89	7	Kdelr1
	4.56893e-93	0.306167	0.595	0.315	7.58853e-89	7	Siva1
	5.06691e-93	0.310315	0.967	0.877	8.41563e-89	7	Arf4
	6.37764e-93	0.341831	0.865	0.655	1.05926e-88	7	Rcn1
	6.21131e-92	0.312996	0.687	0.416	1.03164e-87	7	Erlec1
	9.50756e-92	0.336173	0.911	0.747	1.57911e-87	7	Eif3e
	2.65562e-91	0.46577	0.739	0.533	4.41071e-87	7	Col4a2
	3.59937e-91	0.648253	0.732	0.513	5.9782e-87	7	Bst2
	2.26813e-90	0.493523	0.628	0.396	3.76713e-86	7	Vamp5
	2.88257e-90	0.317436	0.925	0.781	4.78767e-86	7	Cnpy2
	3.6277e-90	0.321156	0.651	0.38	6.02525e-86	7	Aprt
	9.9089e-90	0.335641	0.896	0.708	1.64577e-85	7	Dap
	1.66958e-87	0.461292	0.723	0.466	2.773e-83	7	Hist1h2bc
	3.29814e-87	0.362172	0.935	0.839	5.47788e-83	7	Pdia6
	5.05075e-87	0.330598	0.416	0.177	8.38878e-83	7	Tnfrsf12a
	6.95859e-86	0.468007	0.876	0.704	1.15575e-81	7	Lsp1
	2.1967e-85	0.285785	0.982	0.943	3.6485e-81	7	Atp5e
	1.22482e-84	0.305738	1	0.997	2.0343e-80	7	Myl6
	1.47181e-84	0.417058	0.715	0.483	2.44453e-80	7	Lgals3bp
	5.48344e-84	0.331852	0.345	0.129	9.10745e-80	7	Crlf1
	8.10122e-84	0.469817	0.42	0.187	1.34553e-79	7	Thbs1
	1.62749e-83	0.309055	0.67	0.41	2.70309e-79	7	Abracl
	1.09687e-82	0.448553	0.627	0.389	1.82179e-78	7	Thbs2
	3.67789e-81	0.339284	0.727	0.495	6.10861e-77	7	Golga7
	4.54749e-81	0.283773	0.678	0.417	7.55293e-77	7	Cmpk1
	7.42288e-81	0.25668	0.412	0.177	1.23287e-76	7	Pycard
	3.19306e-80	0.267019	1	0.999	5.30336e-76	7	Vim
	7.65424e-80	0.298873	0.94	0.829	1.27129e-75	7	Tmem258
	1.26262e-79	0.254744	0.532	0.271	2.09709e-75	7	Nans
	6.51708e-79	0.40438	0.607	0.366	1.08242e-74	7	Cnn2
	8.24011e-79	0.297258	0.617	0.355	1.3686e-74	7	Pbx1
	9.16851e-78	0.313626	0.73	0.491	1.5228e-73	7	Nsa2
	9.63754e-77	0.376864	0.71	0.471	1.6007e-72	7	Cpxm1
	1.00855e-76	0.316614	0.914	0.767	1.6751e-72	7	Nfix
	1.50576e-76	0.304004	0.55	0.302	2.50091e-72	7	Picalm
	2.75069e-76	0.30181	0.778	0.562	4.56863e-72	7	Cdk4
	5.86564e-76	0.295208	0.962	0.872	9.74225e-72	7	Nedd4
	4.32032e-74	0.273898	0.567	0.317	7.17561e-70	7	Antxr1
	5.4364e-74	0.296362	0.829	0.632	9.02931e-70	7	Tceal8
	6.58054e-74	0.298684	0.744	0.525	1.09296e-69	7	Ssr3
	2.11183e-72	0.251461	0.52	0.274	3.50754e-68	7	Xpnpep1
	2.20322e-72	0.29336	0.961	0.883	3.65932e-68	7	Ost4
	1.53276e-71	0.268103	0.507	0.263	2.54576e-67	7	Grb10
	8.2867e-71	0.27662	0.934	0.824	1.37634e-66	7	Ndufa3
	1.15067e-70	0.282263	0.76	0.541	1.91114e-66	7	Pgls
	1.39291e-70	0.285319	0.892	0.738	2.31349e-66	7	Hspe1
	2.53008e-70	0.329885	0.99	0.968	4.20221e-66	7	Anxa2
	6.53945e-70	0.428108	0.33	0.139	1.08614e-65	7	Irf7
	2.35691e-69	0.259606	0.547	0.302	3.91459e-65	7	Luzp1
	8.97782e-67	0.251815	0.509	0.275	1.49113e-62	7	Usp9x
	7.18584e-66	0.265525	0.772	0.561	1.1935e-61	7	Mydgf
	1.46129e-65	0.285659	0.602	0.376	2.42706e-61	7	Vmp1
	8.55231e-65	0.338234	0.843	0.668	1.42045e-60	7	Igf1
	1.41847e-64	0.360292	0.597	0.383	2.35593e-60	7	Hmgn2
	1.83909e-64	0.322575	0.586	0.36	3.05455e-60	7	Dclk1
	9.88185e-64	0.260187	0.97	0.905	1.64128e-59	7	Dad1
	6.48188e-61	0.291629	0.841	0.694	1.07658e-56	7	Sub1
	6.48645e-60	0.250275	0.915	0.766	1.07733e-55	7	Reep5
	1.00909e-59	0.267729	0.771	0.572	1.676e-55	7	Ap3s1
	1.01715e-59	0.251812	0.829	0.661	1.68938e-55	7	Srp9
	1.44857e-58	0.662527	0.644	0.433	2.40593e-54	7	Wisp2
	4.80592e-58	0.262908	0.871	0.728	7.98215e-54	7	Txndc5
	5.51909e-58	0.353882	0.376	0.186	9.16666e-54	7	Cd200
	9.09741e-58	0.273926	0.654	0.442	1.51099e-53	7	Wls
	3.33424e-57	0.318024	0.807	0.653	5.53784e-53	7	Prdx4
	9.05896e-57	0.319369	0.5	0.292	1.5046e-52	7	Frzb
	2.03198e-55	0.270731	0.454	0.251	3.37491e-51	7	P4ha2
	9.75224e-55	0.259903	0.991	0.974	1.61975e-50	7	Rpl22l1
	1.46248e-53	0.265487	0.876	0.745	2.42903e-49	7	Prdx5
	1.2004e-52	0.265699	0.52	0.311	1.99374e-48	7	Lrrc17
	8.43697e-52	0.352761	0.718	0.544	1.4013e-47	7	Eno1
	1.17623e-51	0.270789	0.92	0.814	1.95359e-47	7	Ptgis
	1.88552e-51	0.250661	0.516	0.311	3.13166e-47	7	Skil
	4.04125e-51	0.258084	0.748	0.554	6.71212e-47	7	Serp1
	7.5144e-49	0.274764	0.866	0.728	1.24807e-44	7	Zfp36l1
	9.12862e-49	0.370888	0.743	0.582	1.51617e-44	7	Kdelr2
	4.35965e-45	0.25843	0.321	0.154	7.24095e-41	7	Cst6
	4.89865e-45	0.285477	0.529	0.335	8.13616e-41	7	Ctsh
	9.31766e-45	0.32294	0.6	0.43	1.54757e-40	7	Fam198b
	2.64006e-44	0.309141	0.457	0.267	4.38488e-40	7	Il33
	6.07182e-44	0.280459	0.679	0.519	1.00847e-39	7	2011-09-01
	1.16659e-43	0.272823	0.662	0.487	1.9376e-39	7	Eif4ebp1
	5.31688e-43	1.07239	0.737	0.676	8.8308e-39	7	Eln
	4.68086e-42	0.30028	0.726	0.564	7.77444e-38	7	Srpx2
	1.11642e-41	0.273776	0.793	0.673	1.85426e-37	7	Emilin1
	1.07466e-40	0.341051	0.999	0.999	1.7849e-36	7	Cst3
	1.13443e-40	0.272219	0.834	0.704	1.88417e-36	7	Manf
	3.42202e-40	0.488824	0.521	0.356	5.68364e-36	7	Mt2
	2.54628e-39	0.257923	0.943	0.904	4.22911e-35	7	Calr
	4.34936e-39	0.287318	0.869	0.782	7.22386e-35	7	Ldha
	3.36082e-38	0.257946	0.427	0.247	5.58199e-34	7	Bhlhe41
	5.26461e-36	0.261215	0.9	0.848	8.74399e-32	7	Tagln2
	9.19518e-36	0.257671	0.877	0.782	1.52723e-31	7	Itgb5
	7.28025e-33	0.406735	0.403	0.264	1.20918e-28	7	Serpina3n
	1.14556e-30	0.276912	0.476	0.33	1.90265e-26	7	Fam46a
	1.57976e-27	0.314559	0.768	0.682	2.62382e-23	7	Tm4sf1
	1.11526e-26	0.4252	0.808	0.753	1.85234e-22	7	Mt1
	1.9065e-26	0.294258	0.93	0.895	3.16651e-22	7	Ogn
	8.57819e-24	0.257233	0.743	0.642	1.42475e-19	7	H1f0
	5.46942e-23	0.314624	0.644	0.524	9.08417e-19	7	Id2
	3.18385e-17	0.349809	0.477	0.373	5.28806e-13	7	Slc39a1
	8.57628e-14	0.291816	0.764	0.748	1.42443e-09	7	Itm2a
	1.46307e-10	0.595507	0.265	0.196	2.43002e-06	7	Ifit3
	1.1854e-08	0.431402	0.356	0.301	0.000196883	7	Cxcl1
	0	0.456972	0.554	0.009	0	8	Rrm2
	0	0.390761	0.462	0.011	0	8	Gmnn
	0	1.71758	0.893	0.188	0	9	Ifit3
	0	1.65404	0.898	0.159	0	9	Isg15
	0	1.37441	0.74	0.079	0	9	Ifit1
	0	1.02836	0.647	0.077	0	9	Ifit3b
	3.78412e-297	0.880652	0.59	0.072	6.28504e-293	9	Iigp1
	6.14508e-264	1.00811	0.856	0.196	1.02064e-259	9	Rtp4
	5.7329e-260	0.568763	0.517	0.061	9.52177e-256	9	Usp18
	5.8444e-253	0.483481	0.254	0.014	9.70697e-249	9	Rsad2
	1.69421e-229	0.375052	0.35	0.03	2.81391e-225	9	Gm4951
	1.73577e-226	0.831205	0.78	0.176	2.88294e-222	9	Oasl2
	2.79721e-211	0.864279	0.692	0.139	4.64589e-207	9	Irf7
	2.09038e-184	0.322165	0.288	0.025	3.47191e-180	9	Slfn2
	5.19685e-156	0.500582	0.477	0.083	8.63145e-152	9	Igtp
	1.54343e-150	0.406976	0.331	0.041	2.56348e-146	9	Zbp1
	1.19448e-146	0.687452	0.771	0.248	1.98391e-142	9	Xaf1
	6.26021e-145	0.797668	1	0.996	1.03976e-140	9	Ifitm3
	7.14375e-134	0.707128	0.667	0.193	1.18651e-129	9	Phf11d
	3.38008e-131	0.463384	0.401	0.069	5.61398e-127	9	Cmpk2
	1.911e-128	0.542688	0.573	0.142	3.17398e-124	9	Irgm1
	1.2453e-119	0.53864	0.573	0.148	2.06831e-115	9	Stat1
	6.18436e-111	0.933744	0.986	0.828	1.02716e-106	9	Ly6e
	1.92904e-102	0.428114	0.469	0.112	3.20393e-98	9	Stat2
	3.74121e-101	0.438286	0.441	0.1	6.21377e-97	9	Gbp3
	9.76433e-98	0.639899	0.65	0.228	1.62176e-93	9	Mndal
	1.0163e-94	0.747857	0.686	0.275	1.68797e-90	9	Ifi203
	1.29295e-91	0.566952	0.698	0.271	2.14746e-87	9	Sp100
	8.32404e-90	0.360823	0.398	0.09	1.38254e-85	9	Rnf213
	5.85924e-89	0.469289	0.506	0.146	9.73161e-85	9	Gbp7
	3.87729e-88	0.931095	0.856	0.518	6.43979e-84	9	Bst2
	2.29728e-78	0.264576	0.302	0.06	3.81554e-74	9	Irgm2
	1.15885e-77	0.456306	0.528	0.171	1.92474e-73	9	Sp110
	3.97602e-70	0.326719	0.331	0.077	6.60376e-66	9	Trim30a
	3.93629e-68	0.524791	0.718	0.366	6.53778e-64	9	Ifi35
	1.63313e-65	0.336771	0.435	0.132	2.71247e-61	9	Ddx58
	1.4743e-59	0.444967	0.54	0.216	2.44867e-55	9	Tor3a
	5.30431e-58	0.278331	0.362	0.102	8.80993e-54	9	Eif2ak2
	1.33584e-56	0.279945	0.319	0.084	2.21869e-52	9	Parp14
	1.50308e-56	0.34087	0.48	0.171	2.49647e-52	9	Irf9
	1.05698e-52	0.783755	0.986	0.935	1.75553e-48	9	Ifi27l2a
	2.15414e-51	0.446235	0.698	0.371	3.57782e-47	9	Slfn5
	8.0057e-48	0.487857	0.768	0.49	1.32967e-43	9	Lgals3bp
	1.93626e-47	0.89914	0.941	0.785	3.21593e-43	9	Ly6a
	7.27422e-47	0.284393	0.364	0.119	1.20818e-42	9	Ifih1
	1.28672e-46	0.468707	0.684	0.385	2.13712e-42	9	Lgals9
	6.33733e-46	0.550744	0.667	0.389	1.05257e-41	9	Psmb8
	1.02754e-42	0.378698	1	0.999	1.70665e-38	9	B2m
	3.51877e-41	0.371041	0.446	0.184	5.84433e-37	9	Ifi204
	2.10876e-40	0.636428	0.5	0.236	3.50244e-36	9	Gbp2
	2.09479e-39	0.31863	0.477	0.204	3.47923e-35	9	Ifi207
	7.59996e-35	0.352806	0.997	0.979	1.26228e-30	9	H2-D1
	8.6836e-33	0.490612	0.644	0.395	1.44226e-28	9	H2-T23
	1.37455e-30	0.379841	0.619	0.378	2.283e-26	9	H2-T22
	1.37628e-30	0.269298	0.367	0.151	2.28586e-26	9	H2-Q4
	1.53131e-30	0.27818	0.412	0.187	2.54336e-26	9	Trim12a
	5.34384e-29	0.498845	0.523	0.285	8.87558e-25	9	Apod
	2.27608e-28	0.407285	0.895	0.753	3.78034e-24	9	H2-K1
	1.12092e-25	0.350029	0.506	0.287	1.86174e-21	9	Ifi211
	1.46299e-24	0.314161	0.48	0.266	2.42987e-20	9	Ube2l6
	1.73695e-24	0.331195	0.907	0.794	2.8849e-20	9	Shisa5
	2.52436e-24	0.344867	0.636	0.427	4.19271e-20	9	Psmb10
	2.75938e-24	0.254029	0.339	0.153	4.58306e-20	9	Psmb9
	1.02322e-19	0.313188	0.782	0.638	1.69946e-15	9	Psme2
	2.99054e-19	0.3037	0.695	0.496	4.96698e-15	9	Ifi205
	5.67298e-19	0.292685	0.907	0.8	9.42226e-15	9	Ms4a4d
	1.55283e-18	0.33118	0.568	0.38	2.57909e-14	9	Xdh
	4.79428e-18	0.507457	0.525	0.345	7.96282e-14	9	AW112010
	7.4338e-17	0.280555	1	0.998	1.23468e-12	9	Tmsb10
	1.60813e-16	0.252499	0.452	0.276	2.67094e-12	9	Zc3hav1
	1.23741e-10	0.27501	0.624	0.487	2.05522e-06	9	Vcam1
	0	0.364503	0.289	0.01	0	10	Gdf15
	1.29727e-248	0.635239	0.492	0.052	2.15464e-244	10	Trib3
	3.49406e-188	0.679697	0.605	0.105	5.80329e-184	10	Cyb5r1
	9.62633e-166	0.332053	0.322	0.032	1.59884e-161	10	Slc7a5
	5.36285e-148	0.385273	0.315	0.034	8.90716e-144	10	Asns
	3.14786e-147	1.53101	0.9	0.352	5.22828e-143	10	Cdkn1a
	2.78797e-118	1.00044	0.936	0.534	4.63053e-114	10	Atf5
	2.04928e-106	0.657183	0.434	0.088	3.40366e-102	10	Chchd10
	1.40396e-98	0.507106	0.531	0.133	2.33183e-94	10	Mthfd2
	2.17481e-93	0.750291	0.846	0.436	3.61214e-89	10	Hspa9
	1.03088e-78	0.743146	0.585	0.204	1.71218e-74	10	Gadd45a
	5.10359e-71	0.645112	0.633	0.25	8.47655e-67	10	Ddit3
	1.13794e-66	0.50124	0.997	1	1.89001e-62	10	Rps2
	7.76929e-64	0.424279	0.508	0.169	1.2904e-59	10	Aen
	2.27149e-62	0.639976	0.859	0.528	3.77272e-58	10	Ppp1r14b
	3.1856e-62	0.704005	0.971	0.905	5.29096e-58	10	Rps27l
	4.30157e-62	0.632608	0.871	0.595	7.14448e-58	10	Bax
	8.16235e-62	0.575171	0.637	0.274	1.35569e-57	10	Ifrd1
	2.07758e-59	0.382467	0.524	0.18	3.45066e-55	10	Nop58
	3.80652e-59	0.445547	0.508	0.175	6.32226e-55	10	Hspb8
	3.83623e-58	0.406191	1	1	6.37159e-54	10	Rpl41
	4.40321e-56	0.645283	0.765	0.472	7.31329e-52	10	Atf4
	3.37092e-55	0.353218	1	1	5.59876e-51	10	Rps19
	3.762e-54	0.357527	0.46	0.152	6.2483e-50	10	Lonp1
	3.13391e-53	0.380348	0.527	0.2	5.2051e-49	10	Aars
	4.74353e-53	0.5872	0.752	0.432	7.87853e-49	10	Slc3a2
	4.91762e-53	0.454964	0.691	0.349	8.16767e-49	10	Sars
	6.13138e-53	0.359442	1	1	1.01836e-48	10	Rplp0
	6.05605e-52	0.481067	1	1	1.00585e-47	10	Rplp1
	8.70911e-51	0.492836	1	1	1.4465e-46	10	Ftl1
	3.36633e-49	0.696422	0.865	0.667	5.59114e-45	10	Sqstm1
	4.07721e-49	0.544341	0.83	0.573	6.77184e-45	10	Eif5
	6.15028e-49	0.381316	0.994	0.999	1.0215e-44	10	Rplp2
	3.4464e-48	0.447491	0.601	0.269	5.72413e-44	10	Gnl3
	1.5317e-47	0.358257	0.997	1	2.544e-43	10	Rps18
	1.89829e-46	0.492125	0.884	0.655	3.15286e-42	10	Mtdh
	3.13639e-46	0.463064	0.99	0.96	5.20924e-42	10	Rpl12
	1.36188e-45	0.469136	0.447	0.169	2.26195e-41	10	Srxn1
	1.24627e-44	0.38261	0.486	0.191	2.06993e-40	10	Pgd
	1.45396e-44	0.310704	0.392	0.13	2.41489e-40	10	Bbc3
	2.29243e-44	0.308829	1	1	3.80749e-40	10	Eif1
	4.48567e-44	0.524596	0.711	0.433	7.45026e-40	10	Eprs
	4.60552e-44	0.271908	0.26	0.064	7.64931e-40	10	Plk2
	1.37346e-43	0.307142	1	1	2.28118e-39	10	Rpl32
	5.15097e-43	0.257743	0.37	0.118	8.55524e-39	10	Pno1
	1.76736e-42	0.406122	0.994	0.995	2.93541e-38	10	Rpsa
	5.41257e-42	0.405758	0.984	0.935	8.98973e-38	10	Eif5a
	7.24781e-42	0.441265	0.418	0.155	1.20379e-37	10	Snhg12
	3.42608e-41	0.69877	0.913	0.795	5.69037e-37	10	Nupr1
	4.23974e-41	0.281067	0.344	0.108	7.04179e-37	10	Myc
	1.49453e-40	0.439865	0.672	0.387	2.48227e-36	10	Cebpg
	2.17866e-40	0.352129	0.994	0.998	3.61853e-36	10	Rpl38
	3.24657e-40	0.393902	0.614	0.309	5.39222e-36	10	Arhgef2
	3.73538e-40	0.456133	0.81	0.558	6.2041e-36	10	Cycs
	5.38467e-40	0.454824	0.887	0.715	8.9434e-36	10	Eif2s2
	1.72303e-39	0.487399	0.736	0.459	2.86179e-35	10	Tubb4b
	2.97243e-39	0.320889	0.479	0.199	4.93691e-35	10	Mrps18b
	5.81774e-39	0.451873	0.765	0.483	9.66268e-35	10	Eif3c
	7.19912e-39	0.387234	0.611	0.311	1.1957e-34	10	Gars
	2.2978e-38	0.285309	0.344	0.113	3.81642e-34	10	Nfkb2
	4.3125e-38	0.456848	0.669	0.398	7.16263e-34	10	Srm
	9.15704e-38	0.402119	0.781	0.523	1.52089e-33	10	Slc39a7
	2.15851e-37	0.442744	0.698	0.415	3.58508e-33	10	Nars
	6.69651e-37	0.377208	0.617	0.319	1.11222e-32	10	Lrrc59
	1.10982e-36	0.318361	0.994	0.998	1.84331e-32	10	Rps17
	1.57e-36	0.384755	0.987	0.957	2.60762e-32	10	Rpl5
	4.36367e-36	0.299518	0.463	0.194	7.24762e-32	10	Mrto4
	1.12429e-35	0.326217	0.405	0.159	1.86733e-31	10	Txnrd1
	1.19643e-35	0.458326	0.781	0.522	1.98715e-31	10	Psmd11
	1.81824e-35	0.274002	0.997	1	3.01991e-31	10	Rps6
	7.73761e-35	0.277288	0.997	1	1.28514e-30	10	Rps3
	1.24067e-34	0.281361	1	1	2.06062e-30	10	Rps8
	3.01099e-34	0.457629	0.752	0.519	5.00095e-30	10	Srpr
	3.50297e-34	0.325995	0.511	0.237	5.81809e-30	10	Gar1
	3.8416e-34	0.481568	0.534	0.268	6.38051e-30	10	Gclm
	4.13652e-34	0.412311	0.977	0.928	6.87034e-30	10	Eif4a1
	7.16505e-34	0.377588	0.26	0.077	1.19004e-29	10	Stmn4
	8.25649e-33	0.357983	0.691	0.421	1.37132e-28	10	C1qbp
	1.34716e-32	0.624109	0.875	0.677	2.2375e-28	10	Klf4
	1.39207e-32	0.477735	0.72	0.492	2.31208e-28	10	Eif4ebp1
	1.45217e-32	0.282123	0.453	0.196	2.41191e-28	10	Timm10
	1.58268e-32	0.415342	0.855	0.722	2.62867e-28	10	Rexo2
	1.96108e-32	0.496299	0.814	0.617	3.25715e-28	10	Hsp90aa1
	2.71127e-32	0.286529	1	1	4.50315e-28	10	Rps5
	3.5109e-32	0.327021	0.373	0.146	5.83126e-28	10	Mmp11
	3.66191e-32	0.414945	0.984	0.97	6.08207e-28	10	Hsp90ab1
	7.43158e-32	0.364642	0.965	0.924	1.23431e-27	10	Hint1
	8.6081e-32	0.890324	0.711	0.498	1.42972e-27	10	Gstp1
	9.86045e-32	0.333253	0.987	0.95	1.63772e-27	10	Cox6a1
	1.12948e-31	0.35953	0.746	0.511	1.87595e-27	10	Eif6
	1.86552e-31	0.459494	0.923	0.795	3.09845e-27	10	Uqcrq
	2.06275e-31	0.281888	0.395	0.158	3.42601e-27	10	Relb
	2.21006e-31	0.411209	0.878	0.743	3.67069e-27	10	Hspe1
	2.60156e-31	0.329038	0.527	0.26	4.32093e-27	10	Nop56
	3.57711e-31	0.404375	0.833	0.647	5.94123e-27	10	Slc25a5
	3.70936e-31	0.400625	0.666	0.425	6.16087e-27	10	Grpel1
	1.87466e-30	0.389863	0.817	0.628	3.11362e-26	10	Psmd8
	2.67675e-30	0.380918	0.981	0.98	4.44582e-26	10	Hspa8
	3.08364e-30	0.327134	0.527	0.262	5.12162e-26	10	Snhg6
	3.76579e-30	0.358219	0.916	0.808	6.25459e-26	10	Arhgdia
	7.84826e-30	0.256753	1	1	1.30352e-25	10	Rpl19
	1.28622e-29	0.361668	0.707	0.469	2.13629e-25	10	Banf1
	4.14653e-29	0.342344	0.785	0.592	6.88698e-25	10	Lsm4
	5.69673e-29	0.298698	0.424	0.185	9.46169e-25	10	Tnfrsf12a
	1.22288e-28	0.332016	0.733	0.48	2.03109e-24	10	Txnl1
	2.68081e-28	0.340169	0.736	0.51	4.45256e-24	10	Psmc6
	3.83267e-28	0.347979	0.672	0.425	6.36568e-24	10	Adrm1
	1.10141e-27	0.346075	0.994	0.992	1.82934e-23	10	Rps12
	1.28207e-27	0.284141	0.588	0.326	2.12939e-23	10	Rad23b
	1.38701e-27	0.377012	0.881	0.786	2.30369e-23	10	Rpl36al
	1.47555e-27	0.358907	0.772	0.568	2.45075e-23	10	Cct7
	2.0591e-27	0.371233	0.424	0.203	3.41995e-23	10	Pck2
	2.5105e-27	0.33567	0.881	0.734	4.16968e-23	10	Ranbp1
	2.54283e-27	0.320245	0.949	0.901	4.22338e-23	10	Arf1
	4.04073e-27	0.301365	0.997	0.992	6.71125e-23	10	Rpl30
	4.21253e-27	0.306492	0.556	0.303	6.99659e-23	10	Mafg
	5.2067e-27	0.322984	0.653	0.402	8.64781e-23	10	Trp53
	5.36467e-27	0.26009	0.373	0.158	8.91018e-23	10	Gsr
	5.70603e-27	0.36116	0.887	0.786	9.47715e-23	10	Psmb3
	6.18851e-27	0.390672	0.849	0.715	1.02785e-22	10	Ran
	9.08502e-27	1.12123	0.267	0.094	1.50893e-22	10	Ccl2
	1.26628e-26	0.294512	0.54	0.294	2.10316e-22	10	Mettl1
	1.73945e-26	0.383373	0.942	0.829	2.88905e-22	10	Psma7
	1.82881e-26	0.362368	0.833	0.635	3.03748e-22	10	Psmd7
	2.42775e-26	0.270068	0.994	0.986	4.03225e-22	10	Rps10
	2.55671e-26	0.314668	0.801	0.601	4.24644e-22	10	Eif3g
	4.51023e-26	0.315187	0.772	0.543	7.49105e-22	10	Txn2
	4.69036e-26	0.343677	0.836	0.686	7.79022e-22	10	Kif5b
	6.46574e-26	0.314825	0.678	0.418	1.0739e-21	10	Mvp
	8.75005e-26	0.28672	0.994	0.999	1.4533e-21	10	Rpl35
	9.9683e-26	0.275141	0.997	1	1.65564e-21	10	Rps28
	1.62942e-25	0.737604	0.601	0.36	2.7063e-21	10	Mt2
	1.7499e-25	0.350741	0.839	0.71	2.90641e-21	10	Mrpl52
	2.4807e-25	0.313389	0.611	0.359	4.1202e-21	10	Nhp2
	2.73278e-25	0.275219	0.412	0.192	4.53887e-21	10	Ddx21
	3.15025e-25	0.305378	0.283	0.106	5.23225e-21	10	Uchl1
	3.52726e-25	0.372823	0.817	0.68	5.85842e-21	10	Tmem167
	5.3705e-25	0.300156	0.977	0.962	8.91987e-21	10	Eef1g
	7.56862e-25	0.294811	0.997	0.985	1.25707e-20	10	Rpl29
	9.18406e-25	0.300219	0.627	0.394	1.52538e-20	10	Ebna1bp2
	1.15393e-24	0.360642	0.833	0.686	1.91656e-20	10	Mif
	1.25407e-24	0.343375	0.942	0.839	2.08288e-20	10	Lmna
	1.47692e-24	0.283015	1	0.999	2.45302e-20	10	Rps24
	1.69462e-24	0.405944	0.83	0.668	2.8146e-20	10	Ncl
	3.8941e-24	0.279753	0.987	0.989	6.46771e-20	10	Rps26
	4.35108e-24	0.319956	0.675	0.456	7.22671e-20	10	Hspd1
	4.54103e-24	0.354031	0.929	0.88	7.5422e-20	10	Arf4
	5.14764e-24	0.318897	0.788	0.593	8.54972e-20	10	Psmd4
	5.68483e-24	0.323325	0.675	0.45	9.44193e-20	10	Copb1
	8.19672e-24	0.352441	0.868	0.734	1.36139e-19	10	Vcp
	8.56242e-24	0.316251	0.74	0.541	1.42213e-19	10	Psma6
	1.07096e-23	0.304624	0.707	0.49	1.77876e-19	10	Psmc4
	1.36793e-23	0.255505	0.997	0.998	2.272e-19	10	Rps25
	1.54485e-23	0.258191	0.354	0.154	2.56584e-19	10	Maff
	2.19318e-23	0.506356	0.73	0.53	3.64265e-19	10	Gsta3
	2.22598e-23	0.258423	0.511	0.277	3.69713e-19	10	Pak1ip1
	3.41965e-23	0.325904	0.9	0.764	5.67969e-19	10	Hnrnpf
	3.54481e-23	0.263279	0.556	0.319	5.88757e-19	10	Tmem11
	3.78378e-23	0.2759	0.685	0.433	6.28447e-19	10	Rala
	4.15223e-23	0.349285	0.81	0.667	6.89644e-19	10	Sar1a
	1.33036e-22	0.352191	0.386	0.183	2.2096e-18	10	Mdm2
	1.61251e-22	0.276718	0.949	0.837	2.67822e-18	10	Eef1b2
	1.73545e-22	0.254204	0.479	0.256	2.8824e-18	10	Tomm40
	2.46297e-22	0.276192	0.601	0.362	4.09076e-18	10	Psmd1
	2.62137e-22	0.30125	0.556	0.33	4.35384e-18	10	Psmd14
	2.63587e-22	0.421731	0.74	0.561	4.37791e-18	10	Serp1
	5.3929e-22	0.301792	0.559	0.339	8.95706e-18	10	Creb3
	6.36816e-22	0.446965	0.804	0.642	1.05769e-17	10	Uap1
	9.65541e-22	0.301614	0.511	0.291	1.60367e-17	10	Rassf1
	9.80951e-22	0.258563	0.949	0.889	1.62926e-17	10	Ube2d3
	1.53345e-21	0.264909	0.756	0.547	2.54691e-17	10	Chchd1
	2.53149e-21	0.272146	0.531	0.306	4.20456e-17	10	Trim8
	2.69215e-21	0.283862	0.556	0.335	4.47139e-17	10	Psmd3
	2.91688e-21	0.29455	0.691	0.491	4.84465e-17	10	Prmt1
	2.93534e-21	0.268121	0.621	0.396	4.87531e-17	10	Llph
	3.49575e-21	0.270012	0.547	0.325	5.8061e-17	10	Rela
	9.02495e-21	0.350381	0.701	0.471	1.49895e-16	10	Gfpt2
	9.59604e-21	0.274394	0.55	0.331	1.59381e-16	10	Nfe2l1
	1.04645e-20	0.354274	0.347	0.162	1.73805e-16	10	Ass1
	1.1458e-20	0.253687	0.678	0.469	1.90307e-16	10	Trappc4
	1.24411e-20	0.295707	0.672	0.46	2.06634e-16	10	Mrpl54
	1.31379e-20	0.264597	0.611	0.377	2.18207e-16	10	Sod2
	1.32002e-20	0.277878	0.704	0.478	2.19242e-16	10	Psmd2
	2.31739e-20	0.325326	0.894	0.816	3.84895e-16	10	Morf4l2
	2.98911e-20	0.264079	0.621	0.404	4.96462e-16	10	Strap
	3.10546e-20	0.296251	0.553	0.337	5.15785e-16	10	Fbl
	3.76967e-20	0.287425	0.9	0.819	6.26104e-16	10	Psma3
	4.29123e-20	0.259661	0.421	0.218	7.12731e-16	10	Tgif1
	6.67149e-20	0.329429	0.932	0.867	1.10807e-15	10	Tmbim6
	7.88573e-20	0.278437	0.569	0.356	1.30974e-15	10	Ube2m
	1.12638e-19	0.300539	0.675	0.48	1.8708e-15	10	Ghitm
	1.46615e-19	0.260061	0.99	0.977	2.43512e-15	10	Rpl22
	1.71602e-19	0.297335	0.949	0.938	2.85013e-15	10	Krtcap2
	1.86039e-19	0.372881	0.814	0.672	3.08992e-15	10	Capg
	2.89541e-19	0.309063	0.736	0.539	4.80899e-15	10	Eif3a
	2.90851e-19	0.330388	0.862	0.762	4.83074e-15	10	Uqcc2
	3.06139e-19	0.299177	0.518	0.314	5.08467e-15	10	Rrs1
	4.15678e-19	0.315598	0.781	0.633	6.904e-15	10	Anp32b
	4.31875e-19	0.276365	0.572	0.371	7.17301e-15	10	Eif3j1
	5.21205e-19	0.276564	0.897	0.781	8.6567e-15	10	Serbp1
	5.23865e-19	0.267981	0.582	0.381	8.70087e-15	10	Eif3b
	6.49508e-19	0.254119	0.46	0.253	1.07877e-14	10	Ccng1
	8.73974e-19	0.251213	0.701	0.482	1.45158e-14	10	Pdap1
	1.11277e-18	0.302242	0.669	0.486	1.84819e-14	10	Copb2
	1.62669e-18	0.296692	0.965	0.951	2.70177e-14	10	Tspo
	1.92515e-18	0.25819	0.659	0.449	3.19748e-14	10	Bzw1
	2.21228e-18	0.252456	0.518	0.31	3.67438e-14	10	2310039H08Rik
	2.4501e-18	0.298093	0.743	0.559	4.06937e-14	10	Msn
	2.57383e-18	0.269446	0.955	0.94	4.27487e-14	10	Rack1
	2.81841e-18	0.28212	0.743	0.568	4.6811e-14	10	Cd151
	2.97081e-18	0.266593	0.524	0.322	4.93421e-14	10	Tmem43
	3.87326e-18	0.287436	0.775	0.637	6.4331e-14	10	Psmb5
	4.01172e-18	0.402266	0.666	0.484	6.66306e-14	10	Ngf
	4.83732e-18	0.25137	0.579	0.373	8.03431e-14	10	Nmt1
	7.14769e-18	0.284094	0.701	0.506	1.18716e-13	10	Psmc2
	7.7409e-18	0.295294	0.65	0.466	1.28569e-13	10	Cct3
	8.25653e-18	0.271927	0.437	0.246	1.37133e-13	10	Gnpnat1
	1.00928e-17	0.432962	0.723	0.588	1.67632e-13	10	Kdelr2
	1.40544e-17	0.259536	0.839	0.689	2.33429e-13	10	Rnh1
	1.76244e-17	0.340389	0.987	0.983	2.92723e-13	10	Sec61g
	5.70782e-17	0.261832	0.81	0.653	9.48012e-13	10	Vapa
	1.6179e-16	0.287942	0.653	0.479	2.68717e-12	10	Derl1
	1.74644e-16	0.251968	0.531	0.347	2.90066e-12	10	Magoh
	2.72897e-16	0.348538	0.762	0.67	4.53254e-12	10	Selenos
	2.87992e-16	0.273121	0.781	0.638	4.78326e-12	10	Hdgf
	3.20502e-16	0.284891	0.836	0.72	5.32321e-12	10	Tbrg1
	4.44151e-16	0.256759	0.826	0.73	7.37691e-12	10	Pcbp1
	4.99876e-16	0.257885	0.768	0.604	8.30243e-12	10	Ptp4a2
	7.08263e-16	0.434976	0.675	0.519	1.17635e-11	10	Nfkbia
	7.25544e-16	0.250803	0.608	0.431	1.20506e-11	10	Rnf11
	9.66452e-16	0.250263	0.772	0.607	1.60518e-11	10	Tomm20
	1.11002e-15	0.286707	0.289	0.138	1.84363e-11	10	Hmox1
	1.32101e-15	0.263105	0.617	0.434	2.19407e-11	10	Slc48a1
	2.28186e-15	0.254749	0.849	0.719	3.78995e-11	10	Hnrnpa3
	2.5095e-15	0.256598	0.672	0.507	4.16803e-11	10	Rad23a
	2.90137e-15	0.286093	0.887	0.809	4.81889e-11	10	Cope
	4.21602e-15	0.255609	0.785	0.614	7.00239e-11	10	Vat1
	6.66951e-15	0.304232	0.965	0.955	1.10774e-10	10	Calm1
	1.28712e-14	0.262376	0.846	0.716	2.13777e-10	10	Rap1a
	1.34717e-14	0.258297	0.588	0.415	2.23752e-10	10	Psmd12
	1.49464e-14	1.04589	0.302	0.16	2.48245e-10	10	Ccl7
	1.9853e-14	0.250065	0.704	0.561	3.29739e-10	10	Eif5b
	2.67935e-14	0.296215	0.778	0.663	4.45013e-10	10	Ift20
	3.02918e-14	0.254675	0.617	0.446	5.03117e-10	10	Gorasp2
	1.12833e-13	0.261008	0.752	0.607	1.87405e-09	10	Cdk2ap2
	1.58293e-13	0.264399	0.698	0.56	2.62909e-09	10	Yif1a
	6.3087e-13	0.252308	0.772	0.629	1.04781e-08	10	Psmb4
	7.4708e-13	0.252283	0.9	0.825	1.24083e-08	10	Cald1
	1.78944e-12	0.252206	0.733	0.559	2.97209e-08	10	Zyx
	3.17229e-12	0.269797	0.498	0.334	5.26885e-08	10	Btg1
	7.68202e-12	0.25542	0.502	0.345	1.27591e-07	10	Ak1
	7.78344e-12	0.287569	0.926	0.908	1.29275e-07	10	Txn1
	1.33409e-11	0.269308	0.82	0.746	2.21579e-07	10	Arl1
	1.4353e-11	0.263811	0.881	0.825	2.38389e-07	10	Rtn4
	2.57109e-11	0.267771	0.72	0.631	4.27033e-07	10	Fkbp2
	4.88871e-11	0.253884	0.566	0.401	8.11966e-07	10	Bhlhe40
	1.74674e-09	0.297217	0.711	0.62	2.90116e-05	10	Herpud1
	7.25668e-09	0.258263	0.653	0.557	0.000120526	10	Gm10076
	2.58821e-08	0.383783	0.756	0.694	0.000429876	10	Phlda3
	1.08855e-07	0.403669	0.904	0.907	0.00180797	10	Hspa5
	4.08754e-07	0.359543	0.762	0.691	0.006789	10	Esd
	6.31112e-06	0.25576	0.952	0.964	0.104821	10	Emp3
	8.30656e-06	0.416942	0.678	0.647	0.137964	10	Hspb1
	7.87386e-05	0.297318	0.836	0.755	1	10	Mt1
	0.000171172	0.304457	0.855	0.851	1	10	Serpine2
	0.00119195	0.343536	0.727	0.71	1	10	Manf
	0	2.06686	0.75	0.006	0	11	Wif1
	0	1.70595	0.976	0.173	0	11	Dkk3
	0	1.69137	0.615	0.06	0	11	Clu
	0	0.983305	0.694	0.031	0	11	Lmcd1
	0	0.914185	0.688	0.054	0	11	Atp1b1
	0	0.798522	0.688	0.02	0	11	Cadm1
	0	0.796399	0.576	0.009	0	11	Rspo3
	0	0.784673	0.559	0.042	0	11	Paqr6
	0	0.784449	0.427	0.009	0	11	Cyp2e1
	0	0.507676	0.358	0.013	0	11	Ccdc42
	0	0.424793	0.278	0.003	0	11	Prss35
	0	0.418415	0.372	0.003	0	11	Shisa2
	0	0.386965	0.285	0.002	0	11	Pdzrn4
	7.78708e-301	1.29332	0.681	0.08	1.29336e-296	11	1500015O10Rik
	1.85985e-280	0.406639	0.396	0.026	3.08902e-276	11	Tceal3
	7.65561e-275	0.403461	0.385	0.026	1.27152e-270	11	Cpxm2
	8.89063e-237	1.08921	0.892	0.193	1.47665e-232	11	Cpe
	1.56052e-233	1.04348	0.715	0.119	2.59187e-229	11	Cox4i2
	4.0809e-219	0.357434	0.344	0.026	6.77796e-215	11	Pde4d
	5.45855e-183	0.607732	0.597	0.097	9.06611e-179	11	Tspan7
	1.82229e-178	0.548579	0.483	0.064	3.02664e-174	11	Stk17b
	1.07758e-174	1.2584	0.861	0.248	1.78975e-170	11	Pdlim3
	2.13647e-174	0.497109	0.285	0.022	3.54847e-170	11	S100b
	1.05335e-161	0.488127	0.434	0.056	1.74952e-157	11	Fam19a5
	3.52588e-156	1.26898	1	0.999	5.85613e-152	11	Vim
	2.30189e-152	0.856847	0.715	0.172	3.82321e-148	11	Msx1
	2.1349e-151	0.786537	0.764	0.196	3.54586e-147	11	Bambi
	2.41735e-151	0.463228	0.462	0.067	4.01498e-147	11	Pdgfa
	8.66734e-149	1.53211	1	0.904	1.43956e-144	11	Dbi
	2.58896e-142	0.519196	0.462	0.072	4.3e-138	11	6330403K07Rik
	2.79161e-142	1.19518	0.566	0.111	4.63659e-138	11	Igfbp5
	8.46249e-140	0.66157	0.601	0.128	1.40553e-135	11	Smim3
	7.37197e-138	0.984684	0.389	0.053	1.22441e-133	11	Id4
	1.7593e-137	0.430773	0.351	0.043	2.92202e-133	11	Aldh3a1
	1.05173e-129	0.908452	0.351	0.046	1.74681e-125	11	Fmod
	2.65237e-128	0.446844	0.424	0.065	4.40532e-124	11	Art3
	1.62026e-127	1.38559	0.997	0.89	2.69109e-123	11	Apoe
	1.288e-125	1.5494	0.559	0.125	2.13925e-121	11	Prg4
	1.57739e-124	0.588981	0.604	0.138	2.61989e-120	11	Scara3
	7.69128e-122	0.769278	0.809	0.241	1.27744e-117	11	Tmem176b
	4.3745e-120	0.45535	0.503	0.096	7.2656e-116	11	Npr1
	4.91135e-120	0.77135	0.771	0.226	8.15725e-116	11	Ptn
	3.98649e-119	0.530458	0.389	0.06	6.62116e-115	11	Ptx3
	3.47255e-118	0.344017	0.288	0.033	5.76755e-114	11	Aard
	1.84576e-115	0.60881	0.688	0.197	3.06563e-111	11	Shisa4
	2.99764e-114	0.492192	0.267	0.03	4.97878e-110	11	Aqp1
	8.89675e-111	0.265352	0.253	0.027	1.47766e-106	11	Cracr2b
	4.64376e-104	0.926201	1	0.988	7.71283e-100	11	Ccdc80
	6.27832e-100	0.77004	0.764	0.274	1.04277e-95	11	Mdk
	8.09746e-99	0.610998	0.594	0.153	1.34491e-94	11	Tmem176a
	7.08064e-96	0.631071	1	0.986	1.17602e-91	11	Dpt
	8.6963e-94	0.587713	0.903	0.401	1.44437e-89	11	Postn
	1.60785e-89	0.786286	0.976	0.791	2.67048e-85	11	Il11ra1
	6.94621e-88	0.601496	0.76	0.295	1.1537e-83	11	Tcf12
	1.53267e-86	0.344818	0.396	0.078	2.54561e-82	11	Gnai1
	1.57108e-85	0.346442	0.378	0.073	2.60941e-81	11	Cdh11
	8.56398e-85	0.551353	0.694	0.243	1.42239e-80	11	Etv1
	6.13186e-83	0.560614	0.455	0.103	1.01844e-78	11	Tagln
	6.45505e-83	0.271159	0.312	0.052	1.07212e-78	11	Mrap
	1.03513e-77	0.583651	0.438	0.107	1.71924e-73	11	Rgs5
	1.94973e-76	0.634305	0.542	0.159	3.2383e-72	11	Ccl19
	3.68562e-75	0.789112	0.74	0.328	6.12144e-71	11	Map1b
	8.23839e-75	0.753935	0.816	0.43	1.36831e-70	11	Tbx20
	1.19603e-74	0.612432	0.788	0.369	1.98649e-70	11	2010111I01Rik
	1.25044e-71	0.306439	0.392	0.089	2.07686e-67	11	Tnfaip8
	7.26481e-70	0.466399	1	1	1.20661e-65	11	Fth1
	1.11099e-69	0.413242	0.441	0.115	1.84524e-65	11	Tst
	3.33434e-67	0.701046	0.594	0.207	5.538e-63	11	Cdc42ep3
	3.84789e-66	0.705008	0.58	0.2	6.39096e-62	11	Id1
	3.17857e-63	0.783887	0.802	0.399	5.27929e-59	11	Trf
	1.83294e-62	0.703902	0.67	0.297	3.04433e-58	11	Frzb
	2.03013e-62	0.365865	0.424	0.115	3.37184e-58	11	Gm34030
	4.22761e-59	0.449148	0.462	0.134	7.02165e-55	11	Acta2
	1.76767e-58	0.848896	0.91	0.707	2.93592e-54	11	Fxyd6
	4.59751e-58	0.511919	0.351	0.089	7.636e-54	11	Rtn1
	1.90198e-53	0.641157	0.903	0.675	3.159e-49	11	Socs2
	2.44764e-52	0.737156	0.816	0.488	4.06528e-48	11	Csrp2
	1.35635e-50	0.484894	0.281	0.065	2.25275e-46	11	Nt5dc2
	1.51784e-50	0.457328	0.542	0.208	2.52098e-46	11	Sdc3
	1.23112e-49	0.377173	0.378	0.109	2.04477e-45	11	Ptgfr
	1.32106e-49	0.305824	0.33	0.085	2.19415e-45	11	Cd59a
	3.23841e-49	0.42463	0.545	0.219	5.37868e-45	11	Nudt4
	8.90584e-49	0.603419	0.722	0.379	1.47917e-44	11	Tgfbi
	2.89306e-48	0.752356	0.983	0.876	4.80508e-44	11	Prelp
	4.01916e-48	0.619146	0.833	0.558	6.67543e-44	11	Lmo4
	7.29768e-47	0.440596	0.681	0.336	1.21207e-42	11	St3gal4
	1.38803e-45	0.746002	0.701	0.402	2.30538e-41	11	Itih5
	1.84362e-44	0.406522	0.618	0.281	3.06206e-40	11	Myh10
	4.11104e-44	0.384502	0.455	0.163	6.82803e-40	11	Gng8
	1.99081e-43	0.682962	0.497	0.194	3.30653e-39	11	Thbs1
	5.96117e-43	0.467458	0.792	0.454	9.90091e-39	11	Pdgfrl
	1.20763e-42	0.265155	1	1	2.00576e-38	11	Rps6
	6.02838e-41	0.415347	0.997	0.904	1.00125e-36	11	Cd9
	2.11617e-40	0.308028	0.42	0.144	3.51475e-36	11	Limch1
	3.32014e-39	0.32912	1	1	5.51443e-35	11	Itm2b
	4.09854e-39	0.493514	0.906	0.713	6.80727e-35	11	Aldh1a1
	2.22691e-38	0.449781	0.889	0.687	3.69867e-34	11	Cnn3
	3.29282e-38	0.259853	0.378	0.127	5.46905e-34	11	Fbxw17
	6.96329e-38	0.302773	1	1	1.15653e-33	11	Malat1
	9.20707e-38	0.453507	0.781	0.488	1.5292e-33	11	Mfap2
	8.91056e-37	0.398506	0.49	0.208	1.47995e-32	11	Fblim1
	3.19957e-36	0.315605	0.285	0.083	5.31416e-32	11	Bmp2
	9.73719e-36	0.519325	0.691	0.412	1.61725e-31	11	Bmyc
	1.35913e-35	0.501103	0.549	0.271	2.25738e-31	11	Lgmn
	2.50579e-35	0.264058	0.288	0.085	4.16187e-31	11	Wnt5a
	3.76087e-35	0.404662	0.778	0.474	6.24643e-31	11	Hist1h2bc
	5.869e-35	0.797369	0.757	0.484	9.74783e-31	11	Meox1
	9.10113e-35	0.547619	0.962	0.787	1.51161e-30	11	Timp3
	2.7718e-34	0.379837	0.556	0.271	4.60368e-30	11	Rin2
	4.98636e-34	0.258386	0.326	0.107	8.28185e-30	11	Fam26e
	2.04133e-33	0.322142	0.368	0.134	3.39045e-29	11	Unc5b
	6.89433e-33	0.443427	0.875	0.684	1.14508e-28	11	Tm4sf1
	1.46314e-32	0.352304	0.521	0.248	2.43013e-28	11	Meis2
	2.12132e-32	0.397704	0.955	0.838	3.5233e-28	11	Rhoc
	2.59608e-32	0.520662	0.944	0.753	4.31182e-28	11	Id3
	5.72609e-32	0.951797	0.278	0.089	9.51046e-28	11	Comp
	1.35672e-31	0.451575	0.733	0.443	2.25337e-27	11	Ccnd2
	1.93086e-31	0.368145	0.799	0.53	3.20697e-27	11	Csrp1
	2.03006e-31	0.397087	0.757	0.502	3.37173e-27	11	Ppp3ca
	3.92468e-31	0.484326	0.816	0.579	6.51849e-27	11	Maged2
	6.23116e-31	0.336355	0.413	0.168	1.03493e-26	11	Stxbp6
	6.73612e-31	0.324635	0.535	0.255	1.1188e-26	11	Cavin2
	7.56221e-31	0.346242	0.635	0.355	1.25601e-26	11	Fam3c
	3.73202e-30	0.697615	1	0.978	6.19852e-26	11	Mgp
	1.81944e-29	0.403845	0.99	0.978	3.0219e-25	11	Serpinf1
	3.44038e-28	0.314504	0.66	0.376	5.71413e-24	11	Gata6
	7.50342e-28	0.320841	0.507	0.254	1.24624e-23	11	Gnb4
	2.11178e-27	0.301651	0.493	0.242	3.50746e-23	11	Rnpep
	3.76848e-27	0.296235	1	1	6.25906e-23	11	Dcn
	2.77135e-26	0.292901	0.993	0.976	4.60293e-22	11	Gpx4
	3.50089e-26	0.299265	0.486	0.237	5.81464e-22	11	Ninj1
	5.18106e-26	0.269462	0.431	0.194	8.60523e-22	11	Papss2
	4.83091e-25	0.364042	0.642	0.401	8.02366e-21	11	Por
	6.70026e-25	0.274672	0.444	0.209	1.11285e-20	11	5033428I22Rik
	6.80481e-25	0.283227	0.538	0.287	1.13021e-20	11	Mecom
	1.15081e-24	0.282364	0.514	0.253	1.91138e-20	11	Vit
	2.53567e-24	0.258837	0.438	0.206	4.21149e-20	11	Spats2l
	3.12119e-24	0.264413	1	0.976	5.18398e-20	11	Calm2
	3.67391e-24	0.287462	0.997	0.981	6.10199e-20	11	Cox6c
	9.36195e-23	0.279742	0.927	0.838	1.55493e-18	11	Pebp1
	2.76313e-22	0.289417	0.514	0.283	4.58929e-18	11	Lrrk1
	2.7879e-22	0.306649	0.622	0.378	4.63042e-18	11	Kazald1
	3.11069e-22	0.306932	0.601	0.367	5.16655e-18	11	Twsg1
	3.32779e-22	0.302558	0.465	0.237	5.52713e-18	11	Mafb
	3.91513e-22	0.262833	0.396	0.185	6.50264e-18	11	Me1
	1.37928e-21	0.257937	0.59	0.343	2.29084e-17	11	Bex3
	2.54177e-21	0.283193	0.538	0.306	4.22163e-17	11	Vgll4
	3.37992e-21	0.271536	0.608	0.363	5.61371e-17	11	Arhgdib
	4.31796e-21	0.256376	0.608	0.368	7.1717e-17	11	Hprt
	5.77428e-21	0.388509	0.549	0.31	9.5905e-17	11	Fgl2
	9.45906e-20	0.254155	0.507	0.281	1.57106e-15	11	Mef2c
	2.34306e-19	0.281284	0.83	0.629	3.89158e-15	11	Gstm5
	7.15355e-19	0.256079	0.549	0.312	1.18813e-14	11	Olfml2b
	8.22714e-19	0.324373	0.628	0.409	1.36645e-14	11	Atp1b3
	1.45338e-18	0.317603	0.625	0.426	2.41392e-14	11	Colec12
	4.01861e-18	0.274376	0.903	0.831	6.67451e-14	11	Tubb5
	6.14323e-18	0.253768	0.545	0.33	1.02033e-13	11	Sec11c
	1.55116e-17	0.517104	0.562	0.346	2.57632e-13	11	Myoc
	2.69737e-16	0.267072	0.868	0.773	4.48007e-12	11	Nfix
	3.37062e-16	0.268264	0.906	0.824	5.59826e-12	11	Nfib
	4.17284e-16	0.323113	0.854	0.735	6.93067e-12	11	Gng11
	8.2438e-16	0.401285	0.642	0.478	1.36921e-11	11	Abi3bp
	4.46219e-15	0.272861	0.514	0.319	7.41125e-11	11	Sdc4
	7.74149e-15	0.313979	0.333	0.173	1.28578e-10	11	Pamr1
	1.1268e-14	0.271369	0.736	0.576	1.8715e-10	11	Ccni
	1.17178e-14	0.287068	0.694	0.524	1.9462e-10	11	Prnp
	3.36412e-14	0.424149	0.781	0.675	5.58747e-10	11	Igf1
	3.49698e-14	0.2663	0.549	0.34	5.80814e-10	11	Efemp1
	4.72071e-14	0.540937	0.816	0.726	7.84062e-10	11	Mfap4
	4.79248e-14	0.254795	0.347	0.183	7.95982e-10	11	Cntfr
	6.76651e-13	0.259739	0.271	0.13	1.12385e-08	11	Igfbp3
	7.65384e-10	0.260381	0.625	0.474	1.27123e-05	11	Vcan
	1.90404e-09	0.258205	0.795	0.724	3.16242e-05	11	Mmp23
	3.60753e-05	0.267588	0.389	0.304	0.599175	11	Bok
	0	2.81938	0.954	0.007	0	12	Msln
	0	2.70699	0.991	0.005	0	12	Upk3b
	0	2.64943	1	0.018	0	12	Nkain4
	0	2.57919	0.981	0.004	0	12	Krt19
	0	2.262	0.963	0.028	0	12	Aqp1
	0	2.21261	0.963	0.063	0	12	Clu
	0	2.02357	0.972	0.002	0	12	Gpm6a
	0	2.00105	0.991	0.038	0	12	Slc9a3r1
	0	1.96579	0.852	0.006	0	12	Lgals7
	0	1.96091	0.991	0.002	0	12	Upk1b
	0	1.82227	0.88	0.001	0	12	Krt18
	0	1.80138	0.954	0.059	0	12	Atp1b1
	0	1.74245	0.611	0.006	0	12	Myl7
	0	1.66814	0.981	0.041	0	12	Rspo1
	0	1.6265	0.954	0.023	0	12	C2
	0	1.62264	0.648	0.006	0	12	Dmkn
	0	1.55909	0.944	0.001	0	12	Lrrn4
	0	1.5267	0.741	0.002	0	12	Krt7
	0	1.49946	0.917	0.036	0	12	Cldn15
	0	1.47308	0.796	0.002	0	12	Krt8
	0	1.42867	0.796	0.001	0	12	Tm4sf5
	0	1.32682	0.935	0.004	0	12	Wt1
	0	1.28336	0.769	0.018	0	12	Slc39a8
	0	1.2728	0.907	0.001	0	12	Pkhd1l1
	0	1.20619	0.824	0.012	0	12	Smpd3
	0	1.19904	0.852	0.013	0	12	Tmem151a
	0	1.19794	0.852	0.017	0	12	Esam
	0	1.14998	0.806	0.008	0	12	Spint2
	0	1.11813	0.861	0.014	0	12	Ptgs1
	0	1.06963	0.769	0.041	0	12	Ucp2
	0	1.06221	0.815	0.002	0	12	Lsr
	0	1.02007	0.685	0.014	0	12	Gsta4
	0	1.00441	0.639	0	0	12	Chst4
	0	0.983484	0.667	0.001	0	12	Lgals2
	0	0.972688	0.704	0.025	0	12	Slc16a1
	0	0.971638	0.63	0.021	0	12	Cfb
	0	0.967742	0.667	0.011	0	12	Serpinb6b
	0	0.959051	0.75	0.026	0	12	Plxna4
	0	0.91196	0.426	0.001	0	12	Clic3
	0	0.85364	0.704	0.009	0	12	Unc45b
	0	0.849018	0.713	0.005	0	12	Slc38a1
	0	0.834616	0.565	0.004	0	12	Cldn3
	0	0.834129	0.546	0.001	0	12	Bst1
	0	0.822246	0.741	0.001	0	12	Cxadr
	0	0.814113	0.648	0.026	0	12	Maf
	0	0.808309	0.546	0.003	0	12	Prr15
	0	0.789281	0.611	0.001	0	12	Myo5b
	0	0.78569	0.676	0	0	12	Muc16
	0	0.781319	0.667	0	0	12	Prr15l
	0	0.777073	0.491	0	0	12	Wfdc2
	0	0.769637	0.685	0.015	0	12	Adam33
	0	0.763914	0.583	0.017	0	12	Aplp1
	0	0.758278	0.722	0.006	0	12	F11r
	0	0.753437	0.685	0.006	0	12	Parvb
	0	0.74763	0.685	0.008	0	12	Myrf
	0	0.738927	0.639	0.025	0	12	Il18
	0	0.728667	0.537	0.009	0	12	Slco2a1
	0	0.715936	0.481	0	0	12	Slc26a3
	0	0.712078	0.417	0.003	0	12	Nrgn
	0	0.701744	0.454	0.001	0	12	Plet1
	0	0.692718	0.565	0	0	12	Il18r1
	0	0.683034	0.583	0.001	0	12	Tspan8
	0	0.678445	0.315	0.001	0	12	Krt14
	0	0.670512	0.426	0.006	0	12	Lcn2
	0	0.669011	0.565	0.001	0	12	Cybrd1
	0	0.644575	0.593	0.015	0	12	Stk26
	0	0.640414	0.546	0.005	0	12	Palmd
	0	0.633748	0.463	0.002	0	12	Tmem108
	0	0.624406	0.519	0.015	0	12	Npr3
	0	0.610712	0.556	0.005	0	12	Cyp2s1
	0	0.606555	0.565	0.004	0	12	Ano1
	0	0.604896	0.259	0.001	0	12	Slpi
	0	0.590105	0.602	0.001	0	12	Il17re
	0	0.575798	0.556	0.005	0	12	Lmo7
	0	0.575655	0.556	0.005	0	12	Mbp
	0	0.554072	0.574	0	0	12	Bnc1
	0	0.548262	0.454	0.001	0	12	Fam84a
	0	0.532137	0.5	0.001	0	12	Bex4
	0	0.507823	0.444	0.003	0	12	Spata13
	0	0.503824	0.306	0.001	0	12	AU021092
	0	0.498587	0.417	0.009	0	12	Chrdl1
	0	0.482416	0.417	0	0	12	Lrp2
	0	0.457054	0.463	0.002	0	12	Wdr86
	0	0.452351	0.426	0.007	0	12	Ptk2b
	0	0.441403	0.269	0	0	12	Ckmt1
	0	0.440251	0.463	0.013	0	12	Fam46c
	0	0.428776	0.398	0.007	0	12	Tspan15
	0	0.427378	0.259	0.002	0	12	Gng13
	0	0.426188	0.444	0.004	0	12	Rhpn2
	0	0.417115	0.407	0.001	0	12	6820408C15Rik
	0	0.409664	0.324	0.002	0	12	Trem2
	0	0.404559	0.306	0.001	0	12	Slc23a3
	0	0.40232	0.398	0.003	0	12	Mapk13
	0	0.398414	0.324	0.001	0	12	Zdbf2
	0	0.396556	0.444	0.003	0	12	Stxbp2
	0	0.392518	0.407	0.001	0	12	Rab11fip1
	0	0.387616	0.37	0.005	0	12	Folr1
	0	0.386391	0.37	0	0	12	Gata5
	0	0.36096	0.361	0	0	12	Vtcn1
	0	0.360781	0.361	0.007	0	12	Hotairm1
	0	0.349538	0.333	0.005	0	12	Tnfsf13os
	0	0.347448	0.343	0.001	0	12	Flrt1
	0	0.340461	0.343	0.001	0	12	Fras1
	0	0.340318	0.278	0.001	0	12	Shisa8
	0	0.328265	0.324	0	0	12	A730046J19Rik
	0	0.327884	0.352	0.001	0	12	Nfe2l3
	0	0.326025	0.361	0.002	0	12	Sema3f
	0	0.314461	0.315	0.001	0	12	Sytl1
	0	0.311032	0.306	0.004	0	12	Gcnt2
	0	0.307109	0.296	0.001	0	12	Rorc
	0	0.301046	0.296	0	0	12	Fam110c
	0	0.300045	0.278	0.001	0	12	Hdc
	0	0.294078	0.287	0	0	12	Met
	0	0.287157	0.324	0	0	12	Pcdh15
	0	0.286966	0.278	0.001	0	12	Cobl
	0	0.285346	0.315	0.002	0	12	Baiap2l1
	0	0.279855	0.259	0.001	0	12	Wwc1
	0	0.276427	0.306	0.004	0	12	Star
	0	0.273457	0.259	0	0	12	Bex1
	0	0.266056	0.269	0	0	12	Mpzl2
	0	0.265913	0.259	0.001	0	12	Smim22
	0	0.258939	0.278	0.001	0	12	Cgn
	0	0.252152	0.278	0	0	12	Crb2
	3.74563e-305	0.36646	0.343	0.007	6.22112e-301	12	Cdh3
	7.15084e-299	0.437322	0.398	0.01	1.18768e-294	12	Net1
	4.00909e-295	0.269362	0.269	0.004	6.6587e-291	12	Pawr
	2.38297e-291	1.51535	0.833	0.053	3.95788e-287	12	Hpgd
	1.29622e-282	0.868767	0.731	0.04	2.1529e-278	12	Golm1
	1.73999e-274	0.666027	0.713	0.038	2.88994e-270	12	Ildr2
	2.77024e-270	0.676545	0.574	0.025	4.60109e-266	12	Xpnpep2
	4.87887e-269	0.282398	0.278	0.005	8.10331e-265	12	Itga3
	4.60839e-268	0.443388	0.463	0.016	7.65408e-264	12	Sox6
	2.41061e-256	0.403095	0.435	0.014	4.00379e-252	12	Ptpn13
	1.75788e-254	0.659721	0.426	0.014	2.91966e-250	12	Kdr
	3.92974e-253	0.936173	0.75	0.046	6.52691e-249	12	Fmod
	5.42849e-252	0.357138	0.352	0.009	9.01618e-248	12	Crym
	5.45289e-251	0.517816	0.481	0.018	9.0567e-247	12	Apol9a
	7.49644e-250	0.432469	0.435	0.015	1.24508e-245	12	Fam84b
	1.83037e-241	0.46435	0.528	0.023	3.04006e-237	12	Fcor
	5.2178e-241	0.699214	0.62	0.033	8.66624e-237	12	Slc4a4
	5.04382e-237	0.577862	0.519	0.023	8.37727e-233	12	Stom
	1.9863e-235	0.605993	0.565	0.028	3.29905e-231	12	Cracr2b
	5.15465e-234	0.372525	0.306	0.008	8.56137e-230	12	Dusp5
	9.46689e-229	1.6427	0.88	0.078	1.57236e-224	12	Bcam
	1.61551e-226	0.850689	0.741	0.052	2.68321e-222	12	Espn
	1.25606e-219	1.00407	0.787	0.06	2.08619e-215	12	Stmn1
	9.00131e-219	0.301926	0.269	0.006	1.49503e-214	12	Csf1r
	1.66038e-199	0.291361	0.315	0.01	2.75773e-195	12	Gcnt1
	1.01616e-198	0.692774	0.463	0.022	1.68774e-194	12	Cldn10
	2.42273e-198	0.604143	0.593	0.037	4.02391e-194	12	Nectin2
	3.20519e-198	0.801087	0.611	0.039	5.3235e-194	12	Lgals3
	6.5785e-197	0.862895	0.778	0.065	1.09262e-192	12	Dpp4
	9.75575e-197	0.388241	0.361	0.013	1.62033e-192	12	Ptgds
	5.12476e-192	0.992467	0.796	0.073	8.51171e-188	12	Cdh11
	1.16678e-190	0.51912	0.463	0.023	1.9379e-186	12	Pdlim4
	1.51572e-190	2.5714	0.954	0.112	2.51745e-186	12	Igfbp5
	1.63724e-189	0.259779	0.259	0.007	2.71928e-185	12	Adgrf5
	1.8279e-187	0.436303	0.389	0.016	3.03597e-183	12	Wnt4
	9.13585e-187	1.77663	0.926	0.112	1.51737e-182	12	Gpc3
	2.89239e-182	0.406629	0.296	0.009	4.80397e-178	12	Chil1
	5.88219e-179	0.451032	0.407	0.019	9.76973e-175	12	Prss12
	2.5407e-176	1.28152	0.769	0.075	4.21986e-172	12	Gm20186
	6.8977e-176	1.10121	0.898	0.108	1.14564e-171	12	Tmem98
	3.90002e-173	0.290369	0.296	0.01	6.47754e-169	12	Megf6
	5.39272e-172	0.40856	0.426	0.021	8.95678e-168	12	Cobll1
	3.36354e-169	0.689323	0.583	0.042	5.5865e-165	12	Rasl11a
	1.85752e-168	0.631899	0.611	0.046	3.08516e-164	12	Mmd
	1.34409e-164	0.727329	0.602	0.046	2.2324e-160	12	Hacd4
	1.38807e-160	0.952934	0.741	0.076	2.30544e-156	12	1190002N15Rik
	2.75676e-158	0.352097	0.352	0.016	4.5787e-154	12	Ccdc92
	5.97823e-157	0.424184	0.407	0.021	9.92924e-153	12	Fam213a
	6.50486e-157	1.13347	0.87	0.111	1.08039e-152	12	Mpp6
	1.5248e-151	0.413305	0.398	0.021	2.53254e-147	12	Adamtsl1
	5.4453e-150	0.472205	0.509	0.035	9.0441e-146	12	Arl4d
	4.31072e-149	0.354735	0.38	0.019	7.15967e-145	12	Ctf1
	3.48946e-146	1.7875	0.954	0.166	5.79564e-142	12	Ezr
	5.89806e-144	1.14693	0.769	0.085	9.79608e-140	12	1500015O10Rik
	2.7355e-141	0.963454	0.815	0.101	4.5434e-137	12	Cav1
	8.44184e-140	0.535783	0.583	0.049	1.40211e-135	12	Usp53
	4.51966e-136	0.382301	0.38	0.021	7.50671e-132	12	Celf4
	4.16988e-135	0.773052	0.741	0.087	6.92575e-131	12	Ptprf
	3.14638e-134	0.822217	0.787	0.099	5.22582e-130	12	Gja1
	6.74844e-134	0.69013	0.676	0.071	1.12085e-129	12	Bicd1
	2.93028e-132	0.307222	0.306	0.014	4.86691e-128	12	Arhgef5
	5.76594e-132	0.285519	0.324	0.016	9.57664e-128	12	Tmc4
	5.96525e-132	0.294602	0.296	0.013	9.90768e-128	12	Ppm1l
	4.65231e-131	2.29542	1	0.214	7.72702e-127	12	Gm12840
	5.16326e-130	1.33398	0.926	0.155	8.57565e-126	12	Tmem176a
	1.40795e-129	0.934976	0.824	0.113	2.33846e-125	12	Flrt2
	1.89385e-129	0.531253	0.583	0.054	3.1455e-125	12	Eml2
	3.78121e-127	2.01896	0.972	0.199	6.28021e-123	12	Cpe
	4.74255e-127	0.353706	0.352	0.02	7.8769e-123	12	Apol9b
	7.39436e-127	0.738136	0.722	0.086	1.22813e-122	12	Frmd4b
	4.5346e-125	0.31755	0.324	0.017	7.53152e-121	12	Il18bp
	5.75336e-119	1.22599	0.88	0.157	9.55575e-115	12	Alad
	6.73686e-119	0.636805	0.574	0.057	1.11892e-114	12	Spock2
	2.21492e-117	0.827675	0.713	0.093	3.67876e-113	12	Arhgap18
	1.75635e-109	0.260373	0.269	0.013	2.91712e-105	12	Neu3
	6.60517e-109	1.64728	0.991	0.245	1.09705e-104	12	Tmem176b
	9.93948e-109	0.635604	0.546	0.056	1.65085e-104	12	Abcb1b
	2.99868e-106	0.621466	0.593	0.068	4.98051e-102	12	Sema3d
	7.68097e-104	0.81813	0.676	0.094	1.27573e-99	12	Rpp25
	8.07531e-104	0.692887	0.676	0.09	1.34123e-99	12	Isyna1
	1.02791e-101	0.886517	0.685	0.097	1.70725e-97	12	Serpinb1a
	7.67071e-101	0.490053	0.491	0.048	1.27403e-96	12	Skap2
	1.11697e-100	0.275925	0.306	0.019	1.85518e-96	12	Sox12
	2.45164e-100	0.459747	0.444	0.04	4.07193e-96	12	Ephb6
	1.91318e-98	0.85581	0.815	0.151	3.1776e-94	12	Tns3
	8.69425e-98	0.64699	0.639	0.085	1.44403e-93	12	Ddr1
	1.69356e-96	1.48548	0.88	0.2	2.81283e-92	12	Fabp5
	6.21228e-96	0.38153	0.333	0.023	1.0318e-91	12	Gjb5
	2.15186e-95	0.318305	0.333	0.023	3.57403e-91	12	Trp53i11
	8.10662e-95	0.586039	0.565	0.069	1.34643e-90	12	Plekhb2
	1.65335e-94	0.378839	0.361	0.027	2.74605e-90	12	Cadm1
	3.62113e-94	0.519355	0.509	0.055	6.01433e-90	12	Rbbp8
	7.61771e-94	0.762151	0.722	0.116	1.26523e-89	12	Cd82
	1.65897e-93	0.778181	0.62	0.085	2.75538e-89	12	Sbsn
	1.52921e-92	1.51324	0.954	0.295	2.53986e-88	12	Smim1
	2.64999e-91	0.566455	0.37	0.031	4.40137e-87	12	Fxyd3
	3.04864e-90	0.799529	0.713	0.117	5.06349e-86	12	Tst
	4.69271e-88	1.05674	0.88	0.206	7.79412e-84	12	Aldh1a2
	5.26629e-88	0.418948	0.315	0.023	8.74678e-84	12	Sugct
	1.1795e-87	0.58996	0.63	0.09	1.95903e-83	12	Chchd10
	2.51261e-87	0.396531	0.38	0.033	4.17319e-83	12	AI661453
	1.27649e-86	0.458076	0.519	0.061	2.12013e-82	12	Plscr2
	1.91489e-86	0.343378	0.343	0.027	3.18044e-82	12	Fam180a
	2.02281e-86	0.271485	0.315	0.023	3.35969e-82	12	Prkcz
	1.56141e-83	1.03538	0.852	0.192	2.59334e-79	12	Cd200
	1.98131e-83	0.479268	0.417	0.042	3.29076e-79	12	Ppfibp2
	1.27818e-82	1.55062	0.981	0.34	2.12293e-78	12	Efemp1
	4.85449e-82	0.374543	0.324	0.026	8.06282e-78	12	Perp
	3.69745e-81	0.426781	0.472	0.054	6.14109e-77	12	Kank1
	1.38137e-80	0.878907	0.852	0.205	2.29431e-76	12	Syne2
	5.88988e-80	0.374716	0.398	0.039	9.7825e-76	12	Acp5
	3.22729e-79	1.19267	0.954	0.318	5.36021e-75	12	Tgm2
	6.7613e-77	1.03152	0.796	0.183	1.12298e-72	12	Oasl2
	1.72534e-75	0.294463	0.287	0.022	2.86561e-71	12	Ifi47
	2.01595e-74	0.54219	0.62	0.102	3.34829e-70	12	Tspan5
	3.24358e-74	0.284019	0.296	0.023	5.38726e-70	12	Stard10
	7.8787e-74	1.78617	0.981	0.401	1.30857e-69	12	Trf
	1.04631e-73	0.471757	0.519	0.071	1.73781e-69	12	Irf5
	1.45468e-71	1.25814	0.944	0.359	2.41607e-67	12	S100a1
	1.85673e-71	0.477578	0.565	0.085	3.08384e-67	12	Wnt5a
	2.21429e-71	0.370064	0.38	0.04	3.67772e-67	12	Egln3
	2.5012e-71	1.11265	0.944	0.319	4.15425e-67	12	Sdc4
	3.91154e-70	1.2965	0.722	0.157	6.49668e-66	12	C4b
	5.74217e-70	0.355296	0.259	0.019	9.53718e-66	12	Cmah
	4.73662e-69	0.964712	0.843	0.237	7.86705e-65	12	Gbp2
	5.98009e-69	0.938	0.88	0.267	9.93234e-65	12	Ncoa4
	9.94805e-69	0.952464	0.833	0.238	1.65227e-64	12	Cd2ap
	2.40172e-68	0.301895	0.296	0.025	3.98902e-64	12	Capn6
	3.50306e-68	0.491064	0.583	0.095	5.81823e-64	12	Ces2g
	1.91861e-67	0.555037	0.537	0.084	3.18662e-63	12	Crim1
	4.9575e-66	0.762427	0.713	0.161	8.23391e-62	12	Daglb
	2.64786e-65	0.343689	0.407	0.049	4.39783e-61	12	Ptpn14
	1.02534e-64	0.510365	0.5	0.076	1.70299e-60	12	Zfp579
	1.50372e-64	0.510032	0.546	0.088	2.49753e-60	12	Gsdme
	2.26419e-64	0.287567	0.333	0.034	3.76059e-60	12	Rcan2
	8.6673e-63	0.445231	0.5	0.076	1.43955e-58	12	Zcchc3
	1.54792e-62	1.49937	0.981	0.636	2.57094e-58	12	Aebp1
	8.7544e-62	0.783139	0.796	0.217	1.45402e-57	12	Dab2
	2.08687e-61	2.28788	0.991	0.721	3.46608e-57	12	C3
	2.21109e-61	1.07464	0.972	0.519	3.6724e-57	12	Vamp8
	1.71108e-59	1.2331	0.954	0.476	2.84193e-55	12	Hist1h2bc
	1.61829e-58	0.416523	0.537	0.091	2.68782e-54	12	Tnfaip8
	5.42291e-58	0.895391	0.944	0.363	9.00691e-54	12	Arhgdib
	8.22935e-58	0.361266	0.389	0.05	1.36681e-53	12	Bicdl1
	2.29072e-57	0.630041	0.75	0.19	3.80466e-53	12	Arhgap29
	2.84001e-57	0.447534	0.602	0.115	4.71698e-53	12	Rras2
	5.79923e-57	0.578392	0.352	0.042	9.63195e-53	12	Atf3
	6.55883e-57	0.315788	0.333	0.038	1.08936e-52	12	Fads6
	1.73272e-56	0.483464	0.556	0.103	2.87787e-52	12	Cryl1
	5.23192e-56	0.613234	0.759	0.203	8.6897e-52	12	Slc31a2
	2.71434e-53	1.19281	0.991	0.646	4.50825e-49	12	Hspb1
	4.32501e-53	1.39064	1	0.829	7.18341e-49	12	Ly6e
	4.49324e-53	0.375331	0.444	0.069	7.46282e-49	12	Atp6v0e2
	7.607e-53	0.505036	0.694	0.164	1.26345e-48	12	Ilvbl
	7.73222e-53	1.18978	0.833	0.314	1.28424e-48	12	Bace2
	8.54941e-53	0.420491	0.472	0.079	1.41997e-48	12	Aifm2
	7.57214e-52	1.127	0.843	0.34	1.25766e-47	12	Laptm4b
	1.07603e-50	0.441686	0.528	0.1	1.78718e-46	12	Npr1
	3.24648e-50	0.313251	0.38	0.054	5.39207e-46	12	Pafah1b3
	4.25084e-50	1.12326	1	0.977	7.06021e-46	12	Bsg
	3.76788e-49	0.401232	0.509	0.096	6.25807e-45	12	Neo1
	4.62083e-49	0.314698	0.37	0.052	7.67474e-45	12	Oplah
	5.54072e-48	0.592615	0.676	0.172	9.20258e-44	12	Kiz
	1.03313e-47	0.461779	0.528	0.106	1.71593e-43	12	Plscr1
	1.19867e-47	1.07264	1	0.755	1.99087e-43	12	H2-K1
	2.59005e-47	0.389225	0.426	0.07	4.30181e-43	12	Pdgfa
	2.80965e-47	0.368166	0.37	0.055	4.66655e-43	12	Mapkapk3
	5.15796e-47	0.250486	0.269	0.03	8.56685e-43	12	Itpr3
	2.68449e-46	0.330217	0.417	0.068	4.45867e-42	12	Mras
	3.16978e-46	0.300167	0.361	0.052	5.26468e-42	12	Enpep
	3.47243e-46	0.493485	0.667	0.17	5.76736e-42	12	Efna5
	7.03302e-46	0.786552	0.88	0.39	1.16811e-41	12	Aprt
	7.69277e-46	0.442087	0.537	0.114	1.27769e-41	12	Epb41l3
	1.69419e-45	0.392964	0.491	0.094	2.81388e-41	12	Pelp1
	5.45576e-43	0.795436	0.926	0.555	9.06148e-39	12	Dync1i2
	2.02888e-42	0.860287	0.944	0.682	3.36976e-38	12	Iscu
	3.64848e-42	0.418777	0.519	0.107	6.05976e-38	12	Marcksl1
	3.68475e-42	0.892101	1	0.979	6.12e-38	12	Timp2
	7.18044e-42	0.924181	0.833	0.36	1.1926e-37	12	Pdpn
	7.79529e-42	0.335831	0.324	0.047	1.29472e-37	12	Hmcn1
	8.65472e-42	0.793418	1	0.762	1.43746e-37	12	Atpif1
	8.99833e-42	0.41361	0.519	0.113	1.49453e-37	12	Crls1
	1.83685e-41	0.260903	0.324	0.047	3.05083e-37	12	Gpr146
	2.89345e-41	0.539655	0.602	0.156	4.80573e-37	12	Rabgap1l
	2.93208e-41	0.374323	0.454	0.089	4.86989e-37	12	Col18a1
	3.13709e-41	0.299624	0.352	0.055	5.21039e-37	12	Kifc3
	7.7468e-41	0.732756	0.713	0.221	1.28667e-36	12	Sema3c
	1.53791e-40	0.876022	0.843	0.364	2.55432e-36	12	Ldhb
	1.63742e-40	0.923543	1	0.867	2.71958e-36	12	Mgst1
	9.13539e-40	0.456932	0.537	0.128	1.5173e-35	12	Avpi1
	9.40262e-40	0.473657	0.565	0.141	1.56168e-35	12	Tcea3
	1.54898e-39	0.45061	0.639	0.171	2.5727e-35	12	Ppl
	1.83574e-39	0.39863	0.454	0.094	3.04898e-35	12	Stard5
	1.83898e-39	1.72542	0.972	0.962	3.05436e-35	12	Rarres2
	2.54729e-39	1.19522	1	0.996	4.23079e-35	12	Crip1
	4.10034e-39	0.478878	0.611	0.165	6.81025e-35	12	Rhou
	8.84007e-39	0.741576	0.87	0.438	1.46825e-34	12	Gabarapl1
	1.92581e-38	1.09697	0.898	0.554	3.19857e-34	12	Acaa2
	2.29405e-38	0.286431	0.315	0.047	3.81019e-34	12	Nceh1
	3.20698e-38	0.40392	0.481	0.106	5.32647e-34	12	Sorbs3
	3.53015e-38	0.661296	0.722	0.256	5.86322e-34	12	Cavin2
	3.60152e-38	0.44585	0.565	0.142	5.98176e-34	12	Plce1
	5.81365e-38	0.424646	0.593	0.154	9.65589e-34	12	Psmb9
	8.7478e-38	0.477138	0.546	0.138	1.45292e-33	12	Cdon
	1.39693e-37	0.397071	0.296	0.044	2.32017e-33	12	Cox6b2
	1.92643e-37	0.759069	0.917	0.569	3.1996e-33	12	Cd151
	2.38917e-37	0.760944	0.991	0.904	3.96818e-33	12	Dbi
	7.26967e-37	0.758774	0.741	0.301	1.20742e-32	12	Rbm28
	1.22682e-36	0.294622	0.426	0.084	2.03762e-32	12	Kif13a
	4.13023e-36	0.363855	0.407	0.081	6.85991e-32	12	Zbtb7c
	4.20259e-36	1.39829	0.991	0.854	6.98008e-32	12	Igfbp6
	1.79032e-35	0.539186	0.713	0.249	2.97354e-31	12	Meis2
	5.07651e-35	0.479584	0.639	0.195	8.43157e-31	12	Pts
	5.74359e-35	0.29535	0.398	0.077	9.53953e-31	12	Sap30
	7.71952e-35	0.661217	0.806	0.348	1.28214e-30	12	Card19
	2.49422e-34	0.339156	0.398	0.08	4.14264e-30	12	Enpp5
	7.51656e-34	0.59218	0.815	0.357	1.24842e-29	12	Atp1a1
	1.09919e-33	0.536408	1	0.926	1.82565e-29	12	Ndufa4
	4.96201e-33	0.350201	0.481	0.116	8.24141e-29	12	Pfkl
	8.49662e-33	0.31992	0.426	0.093	1.4112e-28	12	Cgnl1
	8.73312e-33	0.287794	0.333	0.06	1.45048e-28	12	Agrn
	1.4802e-32	0.28733	0.389	0.079	2.45847e-28	12	Mylip
	2.00422e-32	0.606444	0.981	0.862	3.32882e-28	12	Npm1
	3.08026e-32	0.886705	0.907	0.724	5.116e-28	12	Mdh2
	4.22218e-32	0.734318	1	0.979	7.01262e-28	12	H2-D1
	2.00962e-31	0.566648	0.685	0.265	3.33778e-27	12	Akr1b8
	2.05183e-31	0.587352	0.722	0.264	3.40788e-27	12	Sox4
	3.26474e-31	0.531623	0.694	0.256	5.4224e-27	12	Dhrs4
	3.59889e-31	0.569043	0.528	0.154	5.9774e-27	12	Tbx18
	4.40354e-31	0.404958	0.574	0.17	7.31384e-27	12	Fosl2
	6.04341e-31	1.64672	0.778	0.41	1.00375e-26	12	Cdkn1c
	6.75026e-31	0.470961	0.611	0.187	1.12115e-26	12	Basp1
	9.74255e-31	0.492769	0.519	0.146	1.61814e-26	12	Irf7
	1.32989e-30	0.604131	0.926	0.683	2.20882e-26	12	1810037I17Rik
	1.56417e-30	0.745652	0.963	0.818	2.59793e-26	12	Ptgis
	1.57931e-30	0.647833	1	0.905	2.62307e-26	12	Npc2
	2.74241e-30	0.940322	0.741	0.323	4.55487e-26	12	Gm42418
	3.83201e-30	0.433409	0.639	0.216	6.36459e-26	12	Man2b1
	4.7887e-30	0.366777	0.481	0.124	7.95355e-26	12	Ctdspl
	5.75757e-30	0.339564	0.417	0.097	9.56275e-26	12	B4galt4
	6.84621e-30	0.293747	0.389	0.085	1.13709e-25	12	Mpp5
	7.19542e-30	0.267786	0.343	0.068	1.19509e-25	12	Ttll12
	8.35864e-30	0.353916	0.5	0.134	1.38829e-25	12	Ptprd
	3.48708e-29	0.346582	0.407	0.094	5.79168e-25	12	Rnf213
	4.19696e-29	0.353958	0.5	0.136	6.97074e-25	12	Enpp4
	4.2753e-29	0.319664	0.389	0.087	7.10084e-25	12	Sult1a1
	6.92009e-29	0.610958	0.667	0.244	1.14936e-24	12	Hist1h1c
	1.02518e-28	0.573151	0.861	0.471	1.70272e-24	12	P3h4
	1.03211e-28	0.648139	0.954	0.758	1.71424e-24	12	Cryab
	1.16945e-28	0.435515	0.667	0.239	1.94234e-24	12	Ninj1
	2.1718e-28	0.572387	0.815	0.431	3.60715e-24	12	Ifnar2
	3.97309e-28	0.625714	0.713	0.312	6.5989e-24	12	Pltp
	6.77066e-28	0.29921	0.417	0.101	1.12454e-23	12	Dtx2
	8.41798e-28	0.777049	0.861	0.592	1.39814e-23	12	C1ra
	1.30338e-27	0.33552	0.472	0.128	2.16478e-23	12	Rpap3
	1.36092e-27	0.313312	0.426	0.106	2.26034e-23	12	Tmem238
	1.61965e-27	0.295558	0.389	0.091	2.69008e-23	12	Zbtb8a
	1.72471e-27	0.351932	0.574	0.181	2.86457e-23	12	1600012H06Rik
	2.28811e-27	1.07721	0.88	0.685	3.80033e-23	12	Tm4sf1
	2.61449e-27	0.321352	0.435	0.112	4.3424e-23	12	Efnb1
	3.2426e-27	0.565979	0.935	0.706	5.38563e-23	12	Tapbp
	5.20322e-27	0.317775	0.417	0.103	8.64203e-23	12	Tspan7
	5.78168e-27	0.331428	0.417	0.104	9.60279e-23	12	Gbp3
	5.82362e-27	0.703006	0.843	0.461	9.67246e-23	12	Tubb4b
	5.8962e-27	0.340893	0.5	0.144	9.793e-23	12	Man2b2
	7.02956e-27	0.479344	0.676	0.266	1.16754e-22	12	Syngr2
	7.16904e-27	0.39392	0.509	0.151	1.19071e-22	12	Amotl2
	7.41914e-27	0.677563	0.935	0.68	1.23224e-22	12	Prr13
	7.85919e-27	0.673288	0.898	0.615	1.30533e-22	12	Cavin1
	1.06722e-26	0.615977	0.796	0.457	1.77255e-22	12	Dctn6
	1.55123e-26	0.360511	0.444	0.121	2.57643e-22	12	Fah
	1.66434e-26	0.602729	0.981	0.838	2.76431e-22	12	Eef1b2
	3.09981e-26	0.660923	0.787	0.398	5.14848e-22	12	H2-T23
	6.30548e-26	0.509212	0.778	0.389	1.04728e-21	12	Pigyl
	6.88808e-26	0.615665	0.861	0.583	1.14404e-21	12	Gpi1
	1.27658e-25	0.538139	0.75	0.369	2.12027e-21	12	Twsg1
	2.00499e-25	0.282278	0.361	0.085	3.33009e-21	12	Bach1
	2.76395e-25	0.547685	0.861	0.472	4.59064e-21	12	Creg1
	2.98746e-25	0.606471	0.806	0.488	4.96187e-21	12	Psme1
	4.06737e-25	0.602953	0.926	0.711	6.7555e-21	12	Aplp2
	4.43734e-25	0.33905	0.5	0.151	7.36998e-21	12	Clcn3
	6.53557e-25	0.689914	0.722	0.355	1.08549e-20	12	Arhgef12
	9.07878e-25	0.343734	1	1	1.50789e-20	12	Rpl41
	9.6323e-25	0.277823	0.333	0.074	1.59983e-20	12	Cmbl
	3.49564e-24	0.284162	0.259	0.049	5.80592e-20	12	Cpz
	4.07392e-24	0.494976	0.648	0.268	6.76637e-20	12	Ube2l6
	6.03949e-24	0.355324	0.519	0.169	1.0031e-19	12	St3gal6
	7.2684e-24	0.531099	0.954	0.708	1.20721e-19	12	Cebpb
	1.50628e-23	0.479964	1	0.995	2.50178e-19	12	Laptm4a
	1.90196e-23	0.319259	0.519	0.166	3.15897e-19	12	2510002D24Rik
	1.99537e-23	0.415663	1	0.998	3.31411e-19	12	Ptma
	2.42446e-23	0.582106	0.676	0.291	4.02679e-19	12	Cystm1
	2.65163e-23	0.678905	0.824	0.542	4.40409e-19	12	C1s1
	3.00209e-23	0.713412	0.759	0.411	4.98616e-19	12	Sulf1
	3.48652e-23	0.292582	0.398	0.106	5.79076e-19	12	Snta1
	4.23716e-23	0.313073	0.444	0.131	7.03749e-19	12	Tfdp2
	4.84189e-23	0.539295	0.861	0.556	8.0419e-19	12	Nfe2l2
	5.06422e-23	0.268586	0.352	0.086	8.41116e-19	12	Pard6b
	6.98494e-23	0.703857	0.556	0.203	1.16013e-18	12	Id1
	7.74367e-23	0.304181	0.463	0.138	1.28615e-18	12	Ube4b
	9.38095e-23	0.305219	0.472	0.145	1.55808e-18	12	Gm5617
	3.81466e-22	0.413537	0.657	0.283	6.33577e-18	12	Hint2
	4.24218e-22	0.294471	0.38	0.102	7.04584e-18	12	Casp4
	5.79272e-22	0.285793	0.481	0.15	9.62113e-18	12	Gbp7
	1.50904e-21	0.368473	0.565	0.207	2.50637e-17	12	Rab6b
	3.61406e-21	0.344857	0.5	0.169	6.00259e-17	12	Plxnb2
	4.37822e-21	0.318021	0.444	0.136	7.27179e-17	12	Kmt5a
	6.27517e-21	0.365794	0.343	0.091	1.04224e-16	12	Fam110a
	7.18504e-21	0.595974	0.87	0.574	1.19336e-16	12	Cyb5r3
	8.47931e-21	0.389533	0.62	0.254	1.40833e-16	12	Xaf1
	8.64754e-21	0.302236	0.528	0.182	1.43627e-16	12	Zcchc11
	8.99872e-21	0.35773	0.657	0.274	1.4946e-16	12	Anxa11
	1.05243e-20	0.360703	1	0.98	1.74797e-16	12	Chchd2
	1.05802e-20	0.338124	0.472	0.159	1.75726e-16	12	Gsr
	1.63226e-20	0.423476	0.722	0.365	2.71102e-16	12	Idh2
	2.33093e-20	0.452279	0.722	0.365	3.87143e-16	12	Pbx1
	3.32758e-20	0.370761	0.343	0.089	5.52678e-16	12	Ifit1
	6.69546e-20	0.52219	0.917	0.748	1.11205e-15	12	Atp5g2
	7.6487e-20	0.489888	0.87	0.663	1.27037e-15	12	Anapc13
	7.87677e-20	0.323286	0.537	0.195	1.30825e-15	12	Slit3
	9.66194e-20	0.250409	0.398	0.117	1.60475e-15	12	Pkia
	2.30669e-19	0.407232	0.963	0.881	3.83119e-15	12	Uqcr11
	2.33978e-19	0.277295	0.333	0.089	3.88614e-15	12	Acsl4
	3.66269e-19	0.481137	0.796	0.492	6.08337e-15	12	Rbpms
	3.84208e-19	0.347917	0.509	0.189	6.38131e-15	12	Adam10
	4.01672e-19	0.601555	1	0.999	6.67136e-15	12	B2m
	6.05719e-19	0.452127	0.731	0.378	1.00604e-14	12	Gata6
	6.37258e-19	0.253851	0.324	0.086	1.05842e-14	12	Piezo1
	6.82602e-19	0.309035	0.5	0.179	1.13373e-14	12	Suclg2
	7.35006e-19	0.270731	0.361	0.103	1.22077e-14	12	Samd9l
	7.91351e-19	0.370466	0.556	0.216	1.31435e-14	12	Mgll
	1.66777e-18	0.313342	0.435	0.146	2.77001e-14	12	Tob1
	2.87977e-18	0.399075	0.981	0.868	4.78301e-14	12	Tmbim6
	3.49572e-18	0.536882	0.926	0.75	5.80604e-14	12	Prdx5
	5.48006e-18	0.303904	0.5	0.18	9.10184e-14	12	Gucy1a1
	6.23207e-18	0.432978	0.685	0.342	1.03508e-13	12	Stat3
	8.97254e-18	0.50784	0.852	0.619	1.49025e-13	12	Hsp90aa1
	1.01803e-17	0.470868	0.731	0.394	1.69084e-13	12	Timp1
	1.16901e-17	0.449246	0.907	0.67	1.94161e-13	12	Hcfc1r1
	1.41414e-17	0.34053	0.574	0.243	2.34874e-13	12	Bbx
	1.75411e-17	0.252485	0.333	0.095	2.9134e-13	12	Nod1
	2.09109e-17	0.496802	0.843	0.543	3.4731e-13	12	Anxa3
	2.20058e-17	0.330033	0.472	0.175	3.65494e-13	12	Cers4
	3.19457e-17	0.362206	0.546	0.229	5.30586e-13	12	Ube2h
	3.33552e-17	0.411334	0.611	0.299	5.53997e-13	12	Wwc2
	4.95838e-17	0.387054	0.667	0.333	8.23538e-13	12	Tbl1x
	5.75722e-17	0.304037	0.481	0.178	9.56216e-13	12	Hspb8
	6.73725e-17	0.325783	0.528	0.205	1.11899e-12	12	Rtp4
	7.25074e-17	0.278812	0.444	0.158	1.20427e-12	12	Casp6
	1.25695e-16	0.268629	0.426	0.147	2.08767e-12	12	Usp25
	1.27372e-16	0.282929	0.509	0.198	2.11552e-12	12	Fads3
	1.45733e-16	0.285265	0.444	0.162	2.42048e-12	12	Lpcat3
	1.60642e-16	0.374075	0.602	0.275	2.6681e-12	12	Arid5b
	1.71163e-16	0.428204	0.602	0.274	2.84284e-12	12	Il33
	2.18492e-16	0.433063	0.88	0.64	3.62894e-12	12	Psme2
	2.19691e-16	0.494455	0.769	0.476	3.64885e-12	12	Clic4
	2.33914e-16	0.255142	0.407	0.137	3.88508e-12	12	Fam136a
	2.36152e-16	0.276697	0.444	0.161	3.92226e-12	12	Bcl2l1
	2.55533e-16	0.654528	0.676	0.362	4.24415e-12	12	Mt2
	4.41838e-16	0.30121	0.389	0.132	7.33849e-12	12	Mknk2
	5.78068e-16	0.554455	0.454	0.17	9.60113e-12	12	Isg15
	6.20576e-16	0.344634	0.574	0.26	1.03072e-11	12	Odc1
	6.51433e-16	0.50183	0.852	0.536	1.08197e-11	12	Prss23
	7.17907e-16	0.466973	0.87	0.693	1.19237e-11	12	Ndufa1
	9.82407e-16	0.272109	0.481	0.187	1.63168e-11	12	Gsdmd
	9.95073e-16	0.416838	0.528	0.236	1.65272e-11	12	C1qtnf12
	1.48408e-15	0.268199	0.583	0.25	2.4649e-11	12	Ormdl2
	1.88975e-15	0.252276	0.426	0.15	3.13868e-11	12	Ndrg1
	2.83391e-15	0.413337	0.657	0.333	4.70684e-11	12	Ces1d
	3.05106e-15	0.344594	0.444	0.172	5.0675e-11	12	Hist3h2a
	3.4225e-15	0.37059	0.731	0.435	5.68443e-11	12	Slc48a1
	5.16121e-15	0.516386	0.759	0.49	8.57225e-11	12	Tsc22d1
	5.38177e-15	0.323968	1	0.946	8.93859e-11	12	Gng5
	1.06682e-14	0.333757	0.491	0.202	1.77188e-10	12	Bambi
	1.07497e-14	0.323343	0.667	0.332	1.78542e-10	12	Slc38a2
	1.13657e-14	0.600171	0.87	0.72	1.88773e-10	12	Gas6
	1.61332e-14	0.30192	1	0.997	2.67956e-10	12	Myl6
	1.69414e-14	0.505715	0.685	0.391	2.8138e-10	12	Hmgn2
	1.94707e-14	0.266341	0.426	0.163	3.23389e-10	12	Arsb
	2.57329e-14	0.40751	1	0.996	4.27398e-10	12	Ifitm3
	3.66197e-14	0.30045	0.528	0.231	6.08216e-10	12	Rnf181
	3.91835e-14	0.361932	0.62	0.3	6.50798e-10	12	Pdcd4
	5.62642e-14	0.373561	0.667	0.356	9.34492e-10	12	Rgs10
	5.628e-14	0.399692	0.778	0.493	9.34755e-10	12	Lgals3bp
	5.78899e-14	0.462348	0.685	0.399	9.61493e-10	12	Tmem119
	7.43485e-14	0.31399	0.926	0.7	1.23485e-09	12	Sub1
	8.82436e-14	0.284695	0.407	0.154	1.46564e-09	12	Stat1
	1.16819e-13	0.346826	0.722	0.405	1.94024e-09	12	Gm2a
	1.52286e-13	0.269088	0.398	0.147	2.52931e-09	12	Limch1
	2.1399e-13	0.33776	0.944	0.828	3.55416e-09	12	Ndufa3
	3.43458e-13	0.307251	0.565	0.272	5.70449e-09	12	Bmpr1a
	3.59243e-13	0.253223	0.463	0.19	5.96666e-09	12	Sptlc2
	4.71207e-13	0.392205	0.713	0.477	7.82627e-09	12	Il6st
	4.8647e-13	0.279735	0.463	0.196	8.07979e-09	12	Tnks1bp1
	5.42836e-13	0.337673	0.935	0.823	9.01596e-09	12	Bri3
	9.07925e-13	0.282032	0.556	0.263	1.50797e-08	12	Pacsin2
	9.35164e-13	0.294579	0.556	0.262	1.55321e-08	12	Arid4b
	1.05424e-12	0.27226	0.491	0.218	1.75098e-08	12	Pef1
	1.05794e-12	0.446004	0.731	0.505	1.75713e-08	12	Tpi1
	1.25145e-12	0.396307	0.806	0.577	2.07854e-08	12	Rbbp7
	1.31734e-12	0.332415	0.963	0.828	2.18796e-08	12	Gpx1
	1.49608e-12	0.404131	0.657	0.42	2.48484e-08	12	Ctnna1
	1.50504e-12	0.276679	0.444	0.192	2.49972e-08	12	Ssbp3
	1.74238e-12	0.312478	0.611	0.318	2.89391e-08	12	Acadm
	1.97406e-12	0.331975	0.991	0.874	3.27872e-08	12	Hmgn1
	2.34828e-12	0.276118	0.991	0.98	3.90026e-08	12	Cox8a
	2.56963e-12	0.328085	0.648	0.362	4.2679e-08	12	Echs1
	4.65146e-12	0.374629	0.639	0.36	7.7256e-08	12	Csf1
	6.3981e-12	0.277753	0.546	0.265	1.06266e-07	12	Trappc6a
	7.73979e-12	0.312506	0.528	0.255	1.2855e-07	12	Ccng1
	8.38026e-12	0.305375	0.694	0.406	1.39188e-07	12	Vamp5
	1.0986e-11	0.392551	0.963	0.909	1.82466e-07	12	Anxa1
	1.10857e-11	0.300395	0.935	0.838	1.84123e-07	12	Atp5d
	1.16267e-11	0.310146	0.583	0.304	1.93108e-07	12	Metrnl
	1.36617e-11	0.324183	0.898	0.679	2.26907e-07	12	2410015M20Rik
	1.48823e-11	0.362274	0.861	0.678	2.4718e-07	12	Sptssa
	1.62821e-11	0.284353	0.454	0.198	2.70429e-07	12	Ifit3
	2.16548e-11	0.262794	0.509	0.243	3.59664e-07	12	Hpcal1
	2.91658e-11	0.35279	0.861	0.727	4.84415e-07	12	Fis1
	4.00729e-11	0.281448	0.463	0.21	6.65571e-07	12	Adgrd1
	4.59443e-11	0.347302	0.667	0.431	7.63089e-07	12	Pgrmc1
	5.20089e-11	0.28839	0.62	0.34	8.63816e-07	12	Akt2
	5.58603e-11	0.660645	0.593	0.38	9.27784e-07	12	Fmo2
	6.17865e-11	0.314014	0.963	0.896	1.02621e-06	12	App
	6.83984e-11	0.349497	0.667	0.418	1.13603e-06	12	Emp2
	6.85816e-11	0.270864	0.972	0.958	1.13907e-06	12	Cox7c
	7.33331e-11	0.296272	0.444	0.21	1.21799e-06	12	Gpcpd1
	7.43115e-11	0.369538	0.722	0.498	1.23424e-06	12	Zfand6
	7.53701e-11	0.274746	0.481	0.233	1.25182e-06	12	Scamp2
	9.21476e-11	0.580294	0.87	0.7	1.53048e-06	12	H2afz
	1.00075e-10	0.275464	0.556	0.297	1.66215e-06	12	Usp50
	1.10756e-10	0.365243	0.685	0.441	1.83955e-06	12	Psip1
	1.32171e-10	0.250648	0.583	0.309	2.19524e-06	12	Eci1
	1.32792e-10	0.377847	0.639	0.399	2.20554e-06	12	Mast4
	1.39028e-10	0.356555	0.685	0.43	2.30912e-06	12	Psmb10
	1.41708e-10	0.281869	1	0.998	2.35363e-06	12	Tmsb10
	1.52533e-10	0.294888	0.704	0.451	2.53341e-06	12	Wls
	1.78903e-10	0.340667	1	1	2.9714e-06	12	Fth1
	2.44085e-10	0.327031	0.639	0.382	4.05401e-06	12	Xdh
	2.78556e-10	0.31689	0.676	0.417	4.62654e-06	12	Tspan4
	3.30822e-10	0.284385	0.611	0.35	5.49462e-06	12	G3bp2
	3.71996e-10	0.330159	0.593	0.356	6.17848e-06	12	Gltp
	3.76197e-10	0.313754	0.778	0.556	6.24825e-06	12	Eif3m
	4.21661e-10	0.375025	0.676	0.438	7.00337e-06	12	B4galt1
	6.01401e-10	0.277407	0.991	0.955	9.98867e-06	12	Calm1
	6.1914e-10	0.277721	0.5	0.259	1.02833e-05	12	Exosc7
	6.47111e-10	0.256788	0.519	0.273	1.07479e-05	12	Ccdc107
	7.07976e-10	0.259384	0.981	0.933	1.17588e-05	12	Cox6b1
	7.68202e-10	0.316537	0.741	0.515	1.27591e-05	12	Tnfrsf1a
	9.01821e-10	0.359968	0.815	0.587	1.49783e-05	12	Nbl1
	9.6398e-10	0.299914	0.917	0.81	1.60108e-05	12	Ubl5
	1.01073e-09	0.251865	0.648	0.378	1.67872e-05	12	Phpt1
	1.37588e-09	0.297958	0.694	0.445	2.2852e-05	12	Man1a
	1.45969e-09	0.272044	0.611	0.355	2.4244e-05	12	Gaa
	1.83393e-09	0.323838	0.611	0.379	3.04597e-05	12	Sod2
	2.85557e-09	0.328059	0.954	0.839	4.74281e-05	12	Pabpc1
	2.86676e-09	0.325529	0.935	0.843	4.76141e-05	12	Clic1
	2.97539e-09	0.253932	0.5	0.261	4.94182e-05	12	Mif4gd
	3.12759e-09	0.361672	0.556	0.312	5.19462e-05	12	Fgl2
	3.26774e-09	0.275465	0.611	0.37	5.42738e-05	12	Lrp10
	3.89399e-09	0.281747	0.444	0.222	6.46753e-05	12	Sdf2l1
	4.0375e-09	0.339463	0.5	0.273	6.70589e-05	12	Lgmn
	4.73008e-09	0.312901	0.935	0.831	7.85619e-05	12	Tubb5
	4.98824e-09	0.257156	0.583	0.341	8.28496e-05	12	Creb3
	5.16241e-09	0.26638	0.741	0.522	8.57425e-05	12	Mat2b
	5.99214e-09	0.310771	1	0.995	9.95234e-05	12	S100a11
	6.33518e-09	0.265298	0.907	0.801	0.000105221	12	Tma7
	8.02037e-09	0.303353	1	0.977	0.00013321	12	S100a10
	1.16845e-08	0.265681	0.694	0.454	0.000194068	12	Tmbim4
	1.31689e-08	0.254118	0.833	0.674	0.000218723	12	Mdh1
	2.45018e-08	0.251474	0.75	0.532	0.000406951	12	Lamtor4
	3.10713e-08	0.311998	0.565	0.345	0.000516062	12	Bex3
	3.92696e-08	0.321862	0.824	0.721	0.000652229	12	Tbrg1
	3.95671e-08	0.25365	0.519	0.303	0.00065717	12	Pdcd6ip
	4.24415e-08	0.497209	0.491	0.272	0.00070491	12	Hmgb2
	4.6549e-08	0.321844	0.889	0.826	0.000773133	12	Cald1
	4.79834e-08	0.266628	0.796	0.605	0.000796956	12	Maged1
	5.43644e-08	0.26688	0.537	0.319	0.000902938	12	Ppfibp1
	5.57555e-08	0.286859	0.824	0.675	0.000926043	12	Chmp4b
	6.61964e-08	0.273573	0.907	0.814	0.00109946	12	Prdx2
	7.42433e-08	0.266763	0.537	0.33	0.00123311	12	Ppp1r12a
	7.95454e-08	0.283446	0.62	0.402	0.00132117	12	Plp2
	9.34483e-08	0.262114	0.972	0.961	0.00155208	12	Rnase4
	1.01409e-07	0.258093	0.759	0.552	0.0016843	12	Zfyve21
	1.24247e-07	0.256025	0.926	0.83	0.00206363	12	Psma7
	1.6851e-07	0.516352	0.88	0.755	0.00279878	12	Mt1
	2.0932e-07	0.258371	0.63	0.411	0.0034766	12	Ubxn4
	2.16129e-07	0.286995	0.593	0.38	0.00358969	12	Ankrd12
	2.72144e-07	0.284055	0.75	0.574	0.00452004	12	Nnmt
	3.24971e-07	0.343275	0.648	0.446	0.00539744	12	Ccnd2
	4.79901e-07	0.267735	0.75	0.547	0.00797068	12	Atp5g3
	5.42146e-07	0.25125	0.704	0.523	0.0090045	12	Bst2
	8.66475e-07	0.262095	0.593	0.404	0.0143913	12	Paics
	9.8691e-07	0.29558	0.657	0.484	0.0163916	12	Vdac1
	1.09915e-06	0.568997	0.667	0.491	0.0182558	12	Csrp2
	1.33372e-06	0.323359	0.824	0.706	0.0221517	12	Cstb
	1.5655e-06	0.261457	0.722	0.512	0.0260014	12	Eny2
	2.21958e-06	0.301054	0.435	0.246	0.0368649	12	Ier3
	2.53286e-06	0.254318	0.778	0.633	0.0420683	12	1810058I24Rik
	3.42222e-06	0.250745	0.88	0.767	0.0568396	12	Mrpl33
	3.47395e-06	0.29741	0.389	0.219	0.0576989	12	Fabp3
	3.74944e-06	0.318767	0.704	0.552	0.0622745	12	Eno1
	4.23797e-06	0.266112	0.63	0.45	0.0703885	12	Hnrnpab
	4.68311e-06	0.263578	0.63	0.448	0.0777818	12	Plat
	2.09238e-05	0.283915	0.731	0.623	0.347523	12	Txnip
	2.26365e-05	0.276422	0.87	0.859	0.37597	12	Pkm
	2.55975e-05	0.316786	0.454	0.284	0.425149	12	Dbp
	4.42364e-05	0.314177	0.75	0.664	0.734723	12	Rcn1
	0.000126792	0.527136	0.685	0.615	1	12	Btg2
