# Supplementary material for: Single-cell transcriptomics defines heterogeneity of epicardial cells and fibroblasts within the infarcted murine heart
Source: eLife. 2021 Jun 21;10:e65921. doi: 10.7554/eLife.65921 (PMC8216715; doi:10.7554/eLife.65921)
Supplement: Supplementary file 3. [file elife-65921-supp3.xlsx]

## Sheet: -log10 p-values
	Ligand in group I																						Ligand in group II
	Ligand in EpiSC-7, receptor in EpiSC-											Ligand in EpiSC-1, receptor in EpiSC-											Ligand in EpiSC-8, receptor in EpiSC-											Ligand in EpiSC-4, receptor in EpiSC-											Ligand in EpiSC-2, receptor in EpiSC-
Ligand-receptor pairs	7	1	8	4	2	11	6	5	10	9	3	7	1	8	4	2	11	6	5	10	9	3	7	1	8	4	2	11	6	5	10	9	3	7	1	8	4	2	11	6	5	10	9	3	7	1	8	4	2
WNT4_FZD1	3	3	3	3	3	3	3	3	3	3	3	3	3	3	3	3	3	3	3	3	3	3	3	3	3	3	3	3	3	3	3	3	3	0	0.701147	0	0	0	0	0	0	0	0	0	0	0	0	0	0
WNT4_SMO	3	3	3	3	3	3	3	3	3	3	3	3	3	3	3	3	3	3	3	3	3	3	3	3	3	3	3	3	3	3	3	3	3	0	0	0	0	0	0	0	0	0	0	0	0	0	0	0	0
WNT5A_FZD1	3	3	3	3	3	3	3	3	3	3	3	3	3	3	3	3	3	3	3	3	3	3	0	3	0	0	0	0	0	0	0.00130484	0	0	0	3	0	0	0	0	0	0	0	0	0	0	3	0	0	0
WNT5A_ANTXR1	3	3	3	3	3	3	3	3	3	3	3	0.17134	3	3	3	3	3	3	3	2.09691	3	3	0	0	3	0.0209071	0	0.841638	3	1.67778	0	0	0	0	0	3	0	0.00130484	0.667562	3	2.04576	0	0	0	0	0	3	0.00130484	0
WNT5A_ROR2	3	3	3	3	3	3	3	0	0	0	0	3	3	3	3	3	3	3	0	0	0	0	0	0	0.00656377	0	0	0	0	0	0	0	0	0	0	0	0	0	0	0	0	0	0	0	0	0	0	0	0
WNT5A_FZD2	3	3	3	3	3	3	3	3	0	3	3	3	3	3	3	3	3	3	3	0	3	3	0	0	0	0	0.00833099	0.00480371	1.67778	0	0	0	0	0	0	0	0	0	0	1.88606	0	0	0	0	0	0	0	0	0
EFNB1_EPHB6	3	3	0	0	0	0	0	0	0	0	0	3	3	0	0	0	0	0	0	0	0	0	3	3	0	0	0	0	0	0	0	0	0	3	3	0	0	0	0	0	0	0	0	0	3	0.0282604	0	0	0
EFNB1_EPHA4	3	3	0	0	0	0	3	0	0	0	0	3	3	0	0	0	0	3	0	0	0	0	3	3	0	0	0	0	3	0	0	0	0	3	3	0	0	0	0	3	0	0	0	0	3	3	0	0	0
WNT4_NOTCH1	0	0	0	3	3	3	0	0	3	3	0	0	0	0	3	3	3	0	0	3	3	0	0	0	0	3	3	3	0	0	3	3	0	0	0	0	0	0	0	0	0	0	0	0	0	0	0	0	0
EFNA1_EPHA7	0	0	0	0	3	3	3	0	3	0	0	0	0	0	0	3	1.13668	3	0	3	0	0	0	0	0	0	0	0	0	0	0	0	0	0	0	0	0	0	0	0	0	0	0	0	0	0	0	0	3
EFNA2_EPHA7	0	0	0	0	3	3	3	0	3	0	0	0	0	0	0	3	3	3	0	3	0	0	0	0	0	0	0.05061	0.138466	3	0	3	0	0	0	0	0	0	0	0.00656377	3	0	3	0	0	0	0	0	0	0
EFNA4_EPHA7	0	0	0	0	3	2.30103	3	0	3	0	0	0	0	0	0	3	1.48149	3	0	3	0	0	0	0	0	0	3	2.30103	3	0	3	0	0	0	0	0	0	0	0	0	0	0	0	0	0	0	0	0	3
EFNB1_EPHB3	0	0	3	3	3	3	3	0	0	0	0	0	0	3	3	3	3	3	0	0	0	0	0	0	3	3	3	3	3	0	0	0	0	0	0	3	3	3	3	3	0	0	0	0	0	0	1.07058	0	0.00130484
EFNB1_EPHB2	0	0	3	0	3	3	0	0	0	0	0	0	0	3	0	3	3	0	0	0	0	0	0	0	3	0	3	3	0	0	0	0	0	0	0	3	0	3	3	0	0	0	0	0	0	0	1.12494	0	0.00305075
EFNB1_EPHB4	0	3	3	0	3	3	0	0	0	0	0	0	3	3	0	3	3	0	0	0	0	0	0	3	3	0	3	3	0	0	0	0	0	0	3	3	0	3	3	0	0	0	0	0	0	0.0118872	0.442493	0	0
FGF1_TGFBR3	0.428291	3	0.530178	0.141463	0	0.0241089	0.342944	3	0.430626	2.04576	3	0.218963	3	0.267606	0.00788851	0	0.00480371	0.106238	3	0.259637	1.76955	3	0	0	0	0	0	0	0	0	0	0	0	0	0	0	0	0	0	0	0	0	0	0	0	0	0	0	0
WNT2_FZD4	1.61979	0	0	0.522879	0.392545	0.517126	3	3	0	3	3	0.785156	0	0	0.0132283	0	0.238824	3	3	0	3	3	3	0	0	3	3	3	3	3	0	3	3	0.772113	0	0	0.00130484	0.0109954	0.221849	3	3	0	3	3	0	0	0	0	0
FGF1_FGFR1	0	0	0.248721	1.38722	3	3	3	3	0.617983	3	3	0	0	0.158015	0.876148	3	3	3	3	0.464706	3	3	0	0	0	0	0	0	0	0	0	0	0	0	0	0	0	0	0	0	0	0	0	0	0	0	0	0	0
TGFB2_TGFBR3	0	0	0	0	0	0	0	0.554396	0	0	0.103474	0	0	0	0	0	0	0	1.35655	0	0	0.0452752	3	3	3	3	3	3	3	3	3	3	3	3	3	3	3	3	3	3	3	3	3	3	0.468521	3	0.575118	0.218245	0
TGFB2_TGFbeta receptor1	0	0	0.0296531	0	0	0	0.05061	1.5376	0	0	0	0	0	0.0154727	0	0	0	0.0154727	3	0	0	0	3	3	3	3	3	3	3	3	3	3	3	3	3	3	3	3	3	3	3	3	3	3	1.88606	3	3	0.519993	0.145087
TGFB2_TGFbeta receptor2	0	0	0	0	0	0	0	0	0	0	0	0	0	0	0	0	0	0	0	0	0	0	3	3	3	3	3	3	3	0	3	3	3	3	3	3	3	3	3	3	0	3	3	3	3	3	3	3	3
HGF_MET	0	0	0	0	0	0	0	0	0	0	0	0	0	0	0	0	0	0	0	0	0	0	3	3	0	0	0	0	0	0	0	0	0	3	3	0	0	0	0	0	0	0	0	0	3	3	0	0	0
PDGFC_FLT4	0	0	0	0	0	0	0	0	0	0	0	3	3	0	0	0	0	0	0	0	0	0	3	3	0	0	0	0	0	0	0	0	0	3	3	0	0	0	0	0	0	0	0	0	3	3	0	0	0
HGF_CD44	0	0	0	0	0	0	0	0	0	0	0	0	0	0	0	0	0	0	0	0	0	0	2.30103	3	3	3	0	0.546682	0	0	0	0	0	3	3	3	0	3	1.18709	0	0	0	0	0	3	3	3	3	0
PDGFC_PDGFRA	0	0	0	0	0	0	0	0	0	0	0	0	0.5867	0.00130484	0	0	0.00130484	3	3	0	0.490797	3	0	3	1.38722	3	0	0.244888	3	3	0	3	3	0	3	0.815309	3	0	0.111259	3	3	0	3	3	0	3	0.416801	1.76955	0
IGF1_IGF1R	0	0	0	0	0	0	0	0	0	0	0	0.211125	0	0	0	0	0.00656377	0.00305075	0.00788851	0.471083	3	1.29243	2.39794	0.537602	0.318759	1.06048	0.790485	0.756962	1.19382	1.55284	1.92082	3	3	0	0	0	0	0	0	0	0	0	0	0	0	0	0	0	0
FGF2_CD44	1.88606	3	3	3	0	0.44855	0	0	0	0	0	2.04576	3	3	3	0	0.458421	0	0	0	0	0	1.88606	3	3	3	0	0.381952	0	0	0	0	0	0	0	0	0	0	0	0	0	0	0	0	0	0	0	0	0
WNT5A_ROR1	3	3	3	0	0	0	0	0	0	0	0	3	3	3	0	0	0	0	0	0	0	0	0	0	0.0491485	0	0	0	0	0	0	0	0	0	0	0	0	0	0	0	0	0	0	0	0	0	0.00833099	0	0
WNT5A_PTPRK	3	3	0	0	3	0	0	0	3	0	0	3	3	0	0	3	0	0	0	3	0	0	0.0118872	0	0	0	0	0	0	0	0.0731433	0	0	0	0	0	0	0	0	0	0	0	0	0	0.00130484	0	0	0	0
	Shown are -log10 p-values of predicted ligand-receptor interactions between individual EpiSC populations as calculated by CellPhoneDB.
[truncated: 72 more columns]
