# Supplementary material for: Single-cell transcriptomics defines heterogeneity of epicardial cells and fibroblasts within the infarcted murine heart
Source: eLife. 2021 Jun 21;10:e65921. doi: 10.7554/eLife.65921 (PMC8216715; doi:10.7554/eLife.65921)
Supplement: Supplementary file 4. [file elife-65921-supp4.xlsx]

## Sheet: Average gene expression
	EpiSC-1.1	EpiSC-1.2	EpiSC-1.3	EpiSC-1.4	EpiSC-1.5	EpiSC-7	EpiSC-8
Xkr4	0.00222717	0	0.00501672	0.00215054	0	0.0135135	0.00277778
Mrpl15	1.28396	0.98682	1.10033	1.92903	1.02288	1.02252	1.02222
Lypla1	0.572383	0.362438	0.647157	0.804301	0.320261	0.777027	0.477778
Gm37988	0.00334076	0	0.00167224	0.00215054	0	0	0
Tcea1	0.826281	0.736409	0.811037	1.03226	1.06863	0.869369	0.819444
Rgs20	0.00111359	0	0	0	0	0	0.00277778
Atp6v1h	0.457684	0.388797	0.466555	0.432258	0.29085	0.583333	0.352778
Rb1cc1	0.454343	0.530478	0.506689	0.275269	0.300654	0.529279	0.494444
4732440D04Rik	0.0345212	0.0362438	0.0685619	0.0516129	0.00980392	0.0653153	0.0277778
Pcmtd1	0.403118	0.456343	0.511706	0.247312	0.24183	0.5	0.463889
Gm26901	0.0122494	0.0197694	0.0100334	0.0107527	0.0130719	0.00225225	0.0194444
Sntg1	0.00890869	0.0527183	0.0668896	0.0215054	0.0228758	0.0157658	0.0555556
Rrs1	0.613586	0.555189	0.632107	1.14839	0.558824	0.612613	0.555556
Adhfe1	0.0489978	0.108731	0.0802676	0.0430108	0.0196078	0.036036	0.025
3110035E14Rik	0.00445434	0.00988468	0.00334448	0.00430108	0	0	0
Mybl1	0.013363	0.00823723	0.0217391	0.0516129	0.0424837	0.0382883	0.00833333
Vcpip1	0.237194	0.200988	0.195652	0.206452	0.25817	0.243243	0.186111
1700034P13Rik	0.00890869	0.00329489	0.00668896	0.00215054	0.00326797	0.0045045	0.00555556
Sgk3	0.109131	0.0675453	0.108696	0.129032	0.0686275	0.137387	0.0694444
Mcmdc2	0.0077951	0.00658979	0	0.00430108	0.00326797	0.00225225	0.00277778
Snhg6	1.13474	0.624382	0.623746	1.33548	1.54248	0.684685	0.894444
Tcf24	0.0077951	0.00494234	0.0083612	0.00430108	0.00653595	0.0112613	0.00555556
Cops5	1.34855	1.20264	1.39967	1.69032	1.05229	1.15541	1.14722
Cspp1	0.265033	0.192751	0.27592	0.212903	0.196078	0.281532	0.258333
Arfgef1	0.267261	0.177924	0.284281	0.24086	0.503268	0.371622	0.308333
Cpa6	0.00334076	0	0	0	0	0.00225225	0
Prex2	0.00890869	0.00329489	0.0117057	0.0408602	0.0130719	0.027027	0.00277778
Sulf1	0.528953	0.220758	0.660535	0.339785	0.633987	2.01126	0.608333
Slco5a1	0.0367483	0.0197694	0.0217391	0.0451613	0.0620915	0.0225225	0.0583333
Ncoa2	0.119154	0.0741351	0.103679	0.105376	0.104575	0.0990991	0.105556
Tram1	2.8029	2.47611	2.4699	2.36129	2.05556	2.2973	2.74167
Lactb2	0.16147	0.112026	0.188963	0.247312	0.0882353	0.225225	0.116667
Gm9947	0.00111359	0	0	0.00645161	0	0.00225225	0
Msc	0.0167038	0.014827	0.0100334	0.0387097	0.0163399	0.0157658	0.0277778
Kcnb2	0.00222717	0	0	0	0	0.0045045	0
Terf1	0.304009	0.31631	0.396321	0.567742	0.27451	0.346847	0.308333
Sbspon	0.00111359	0	0	0.00215054	0	0.00225225	0.00277778
4930444P10Rik	0.00668151	0	0.0083612	0.0129032	0.00326797	0.0135135	0.00555556
Rpl7	17.4788	16.7908	14.7508	17.3376	17.9869	12.9527	15.1139
Rdh10	0.756125	0.747941	1.08696	1.5957	0.751634	0.743243	0.461111
Stau2	0.190423	0.156507	0.140468	0.182796	0.0882353	0.126126	0.180556
Ube2w	0.63029	0.622735	0.66388	0.494624	0.408497	0.722973	1.06389
Eloc	5.24722	3.20264	3.53177	6.17204	6.70588	3.54955	5.91944
D030040B21Rik	0.0077951	0.00494234	0.00334448	0.00645161	0.00326797	0	0.0166667
Tmem70	1.24944	0.667216	0.76087	1.12258	0.640523	0.722973	1.33056
Ly96	0.623608	0.733114	0.668896	0.380645	0.568627	0.504505	0.486111
Jph1	0.0155902	0.00823723	0.0117057	0.0365591	0.0294118	0.0112613	0.0166667
Gdap1	0	0	0.00167224	0	0	0	0.00555556
Pi15	0.0244989	0.0214168	0.0217391	0.0322581	0.0261438	0.0225225	0.0222222
Gm28154	0	0.00164745	0	0	0	0	0
Crispld1	0.00222717	0.00494234	0.00501672	0.00215054	0.00326797	0.00225225	0.0111111
Mcm3	0.428731	0.357496	0.369565	1.34624	0.633987	0.427928	0.266667
6720483E21Rik	0	0.00164745	0	0	0	0	0.00277778
Paqr8	0.0200445	0.014827	0.0200669	0.0236559	0.0163399	0.0225225	0.0166667
Efhc1	0.0723831	0.0461285	0.0468227	0.0408602	0.0228758	0.036036	0.075
Tram2	0.288419	0.21911	0.307692	0.288172	0.186275	0.351351	0.2
Tmem14a	0.197105	0.23229	0.279264	0.133333	0.101307	0.259009	0.147222
Gsta3	0.0545657	0.14168	0.158863	0.0430108	0.0392157	0.371622	0.00833333
Gm28836	0	0	0	0	0	0.00225225	0
Kcnq5	0.0144766	0.00658979	0.00167224	0.0129032	0.00653595	0	0
Rims1	0.00222717	0	0	0	0	0.00225225	0
Gm29107	0.0077951	0.00494234	0.0167224	0.0365591	0.0261438	0.0292793	0.00833333
Ogfrl1	0.135857	0.0955519	0.118729	0.148387	0.0947712	0.0990991	0.0777778
B3gat2	0.00445434	0.00164745	0	0.00645161	0.00326797	0	0.00277778
Smap1	1.22606	1.15321	1.199	1.05591	1.12092	1.38288	1.17778
Sdhaf4	1.02895	1.19605	1.23913	0.969892	1.13072	1.17793	1.05
Fam135a	0.108018	0.0790774	0.09699	0.122581	0.0718954	0.0990991	0.0972222
Col9a1	0.00445434	0.00164745	0.00167224	0.00215054	0.00326797	0	0
Lmbrd1	0.380846	0.446458	0.494983	0.309677	0.166667	0.601351	0.338889
Adgrb3	0.00222717	0	0.00167224	0	0	0	0
Phf3	0.448775	0.375618	0.41806	0.455914	0.444444	0.378378	0.458333
Ptp4a1	0.846325	0.892916	0.866221	0.75914	0.928105	1.12387	0.780556
Khdrbs2	0.00222717	0.0131796	0.00167224	0	0	0.00675676	0
Prim2	0.174833	0.140033	0.152174	0.389247	0.160131	0.173423	0.130556
Rab23	0.185969	0.0971993	0.120401	0.165591	0.137255	0.162162	0.236111
Bag2	0.315145	0.110379	0.133779	0.277419	0.124183	0.0945946	0.319444
Zfp451	0.315145	0.224053	0.242475	0.204301	0.24183	0.268018	0.263889
Bend6	0.122494	0.120264	0.14214	0.0967742	0.0686275	0.101351	0.166667
Dst	0.694878	0.660626	0.628763	0.529032	0.869281	0.655405	0.647222
Gm37233	0.0178174	0.00494234	0.00668896	0.0107527	0.00980392	0.0045045	0.0166667
Ccdc115	0.326281	0.230643	0.29097	0.432258	0.169935	0.313063	0.297222
Imp4	0.573497	0.469522	0.505017	0.853763	0.29085	0.547297	0.444444
Ptpn18	0.0668151	0.0873147	0.0551839	0.0473118	0.0294118	0.0630631	0.0472222
4930568A12Rik	0.00556793	0.0115321	0.00668896	0	0	0.00675676	0.00277778
Arhgef4	0.00445434	0.00658979	0.0133779	0.00430108	0	0.0157658	0
Gm38336	0.00222717	0	0.00167224	0.00215054	0	0	0
Fam168b	0.444321	0.411862	0.411371	0.430108	0.611111	0.472973	0.486111
Plekhb2	0.380846	0.230643	0.459866	0.329032	0.284314	0.806306	0.211111
1110002O04Rik	0.0200445	0.0115321	0.0117057	0.00430108	0	0.0518018	0.0111111
Hs6st1	0.0612472	0.0329489	0.041806	0.0795699	0.0653595	0.132883	0.0666667
Uggt1	0.2951	0.23229	0.35786	0.389247	0.470588	0.364865	0.4
Neurl3	0.00334076	0.00329489	0	0.00645161	0.00326797	0.00675676	0
Arid5a	0.217149	0.16804	0.135452	0.204301	0.0915033	0.135135	0.0972222
4930403P22Rik	0.00445434	0.00329489	0.00334448	0.00645161	0	0	0.00277778
Kansl3	0.191537	0.176277	0.183946	0.163441	0.0816993	0.211712	0.180556
Lman2l	0.404232	0.354201	0.391304	0.309677	0.124183	0.29955	0.327778
Cnnm4	0.0712695	0.029654	0.0284281	0.0623656	0.0457516	0.0405405	0.0361111
Cnnm3	0.0523385	0.0560132	0.0735786	0.0731183	0.0294118	0.0608108	0.0611111
Ankrd23	0.00334076	0.00658979	0.00334448	0.00215054	0	0.0045045	0.00277778
Ankrd39	0.269488	0.280066	0.27592	0.266667	0.143791	0.25	0.25
Sema4c	0.146993	0.205931	0.230769	0.144086	0.20915	0.220721	0.1
Fam178b	0.0378619	0.0510708	0.0735786	0.0451613	0.0196078	0.0540541	0.0472222
Cox5b	6.5412	6.20099	6.50836	6.75914	7.04248	6.83108	6.47222
Actr1b	0.5902	0.354201	0.4699	0.67957	0.366013	0.45045	0.6
4933424G06Rik	0	0	0.00167224	0	0	0	0
Tmem131	0.170379	0.128501	0.145485	0.182796	0.232026	0.20045	0.211111
Vwa3b	0.00668151	0.00658979	0.00501672	0.00430108	0.00326797	0.00675676	0.00833333
Inpp4a	0.0890869	0.115321	0.137124	0.116129	0.0588235	0.137387	0.0888889
Coa5	0.315145	0.280066	0.366221	0.324731	0.372549	0.364865	0.358333
Unc50	1.23163	1.18946	1.20569	1.00215	1.01961	1.21847	1.41389
Mgat4a	0.0311804	0.0461285	0.0535117	0.0473118	0.0424837	0.0540541	0.025
2010300C02Rik	0.018931	0.0181219	0.0301003	0.0344086	0.0196078	0.0405405	0.0194444
Tsga10	0.0311804	0.0444811	0.0551839	0.0451613	0.0359477	0.0427928	0.0305556
Lipt1	0.112472	0.0955519	0.090301	0.0989247	0.0555556	0.108108	0.0722222
Mitd1	0.750557	0.973641	1.10702	0.866667	0.924837	0.95045	0.577778
Mrpl30	2.00891	2.00494	1.99164	2.25806	2.14706	2.22973	1.83333
Txndc9	1.88864	2.01318	2.00836	2.03656	1.75163	2.02928	1.81944
Eif5b	2.17038	1.92092	2.03846	2.45376	3.02614	2.22297	2.04722
Rev1	0.132517	0.0971993	0.090301	0.156989	0.179739	0.0990991	0.130556
Aff3	0.0412027	0.00823723	0.00668896	0.0408602	0.0294118	0.045045	0.0361111
Gm16152	0	0	0	0.00215054	0	0.0045045	0
Lonrf2	0.00111359	0.00164745	0	0.00215054	0	0.00225225	0.00277778
Chst10	0.0244989	0.00823723	0.00334448	0.0215054	0.0130719	0.0112613	0.00555556
Pdcl3	1.77171	1.44975	1.50836	1.68387	1.66993	1.40991	2.04444
Npas2	0.0267261	0.00988468	0.0217391	0.0408602	0.0326797	0.0135135	0.0333333
Rpl31	17.3107	16.1351	14.6706	16.1333	16.9542	11.759	16.3528
Tbc1d8	0.0122494	0.0115321	0.0183946	0.0129032	0	0.0202703	0.0277778
Cnot11	0.412027	0.395387	0.369565	0.419355	0.202614	0.346847	0.436111
Rnf149	0.639198	0.448105	0.531773	0.6	0.594771	0.527027	0.725
Creg2	0.00111359	0.00988468	0.00167224	0	0	0	0
Rfx8	0.00222717	0.00494234	0	0.00430108	0	0	0
Gm3646	0	0	0	0	0	0.00225225	0
Map4k4	0.699332	0.713344	0.580268	0.815054	1.49673	0.601351	0.736111
Il1r2	0.451002	0.291598	0.152174	0.356989	0.287582	0.121622	0.361111
Gm16894	0.00111359	0.00329489	0.00334448	0.00430108	0	0	0.00555556
Il1r1	1.23831	0.957166	0.583612	0.692473	1.4902	0.506757	1.49722
Il1rl2	0.181514	0.158155	0.183946	0.172043	0.137255	0.103604	0.577778
Il1rl1	0.0300668	0.0115321	0.0234114	0.055914	0.0424837	0.0720721	0.0138889
Il18r1	0.124722	0.158155	0.856187	0.266667	0.186275	1.95495	0.0194444
Il18rap	0.0211581	0.00658979	0.00668896	0.0322581	0.0392157	0.0157658	0
Slc9a4	0.00445434	0.00164745	0	0.00215054	0.00653595	0	0
Slc9a2	0.00111359	0.00329489	0.00167224	0	0	0.00225225	0
Mfsd9	0.0345212	0.0280066	0.0384615	0.0430108	0.0163399	0.0405405	0.0277778
Tmem182	0.00111359	0	0	0.00215054	0	0.0045045	0
Pantr1	0.00222717	0.00329489	0	0.00215054	0	0.00225225	0
Pou3f3	0	0.00164745	0.00501672	0	0	0.00225225	0
Mrps9	0.457684	0.449753	0.381271	0.455914	0.261438	0.369369	0.397222
Gpr45	0.00668151	0.00164745	0.0100334	0.0129032	0.00980392	0.00675676	0.00833333
Tgfbrap1	0.0489978	0.0313015	0.0568562	0.0989247	0.0653595	0.0923423	0.0638889
8430432A02Rik	0.00222717	0	0	0.00430108	0	0	0.00277778
AI597479	0.0902004	0.0873147	0.090301	0.133333	0.104575	0.126126	0.0833333
Fhl2	0.700445	0.209226	0.254181	0.750538	0.627451	0.418919	1.91944
Nck2	0.0668151	0.0873147	0.0652174	0.083871	0.0882353	0.0945946	0.025
1500015O10Rik	0.391982	1.26359	0.886288	0.215054	0.218954	3.84685	0.144444
Gm29155	0.00111359	0	0.00167224	0.00430108	0.00326797	0.0045045	0.00833333
Gm29157	0.00222717	0.00494234	0.00501672	0.0107527	0	0.00900901	0
Gm29156	0.00111359	0	0	0.00430108	0.00326797	0	0
Uxs1	0.45657	0.349259	0.424749	0.563441	0.392157	0.461712	0.455556
Tpp2	0.51559	0.411862	0.486622	0.535484	0.493464	0.490991	0.425
Mettl21c	0.00111359	0.00494234	0	0	0	0	0
Gm8251	0	0	0.00167224	0	0	0	0
Tex30	0.301782	0.181219	0.20903	0.746237	0.316993	0.301802	0.261111
Kdelc1	0.432071	0.347611	0.339465	0.341935	0.205882	0.351351	0.436111
Bivm	0.0991091	0.0560132	0.0953177	0.12043	0.0392157	0.11036	0.111111
Ercc5	0.139198	0.113674	0.138796	0.137634	0.137255	0.171171	0.169444
Mettl21e	0.00222717	0	0	0	0	0.00225225	0
Gulp1	0.159243	0.176277	0.175585	0.109677	0.0620915	0.15991	0.219444
Col3a1	75.441	68.1829	57.903	33.714	56.7288	38.0878	126.017
Col5a2	5.69599	4.15651	3.64214	2.06882	5.93464	2.81757	10.85
Wdr75	0.44098	0.222405	0.187291	0.511828	0.405229	0.283784	0.366667
Slc40a1	0.0256125	0.00658979	0.00501672	0.0172043	0.00653595	0.0225225	0.0222222
Dnah7b	0.0200445	0.00658979	0.0150502	0.0150538	0.0163399	0.018018	0.0138889
Slc39a10	0.4098	0.288303	0.449833	0.43871	0.320261	0.567568	0.2
Gm28151	0.00111359	0.00329489	0	0.00215054	0.00326797	0.00225225	0.00277778
4933411E06Rik	0	0.00658979	0.00167224	0.00215054	0.00326797	0.0045045	0
Tmeff2	0.554566	0.711697	0.698997	0.767742	0.316993	0.36036	0.166667
Gm29325	0.00111359	0.00329489	0	0	0	0	0
9330175M20Rik	0.00111359	0.00329489	0.00334448	0	0	0.00225225	0
Cavin2	0.724944	1.20264	2.39967	1.02151	0.506536	1.40766	0.169444
Nabp1	0.0701559	0.0362438	0.0434783	0.055914	0.0457516	0.0472973	0.0388889
Myo1b	0.270601	0.0675453	0.14214	0.217204	0.271242	0.114865	0.236111
Stat4	0.00111359	0	0	0	0	0	0
Gm31812	0.00890869	0.00494234	0.00668896	0.0129032	0.00326797	0.018018	0.0111111
Stat1	1.00557	1.31466	1.51672	0.905376	0.934641	1.45946	0.661111
Gls	0.321826	0.276771	0.329431	0.294624	0.480392	0.337838	0.380556
Nab1	0.767261	0.540362	0.993311	1.18065	1.08824	1.20045	0.430556
Gm553	0.00334076	0.00164745	0	0.00215054	0	0	0.00277778
Nemp2	0.0278396	0.0395387	0.0434783	0.0516129	0.0130719	0.0292793	0.0194444
Mfsd6	0.10245	0.103789	0.187291	0.176344	0.127451	0.297297	0.0583333
Inpp1	0.2951	0.321252	0.392977	0.206452	0.133987	0.292793	0.211111
Hibch	0.24833	0.179572	0.219064	0.184946	0.0816993	0.191441	0.208333
1700019D03Rik	0.0211581	0.014827	0.0401338	0.0387097	0.0228758	0.0247748	0.05
Pms1	0.0256125	0.0280066	0.0217391	0.0666667	0.0261438	0.0247748	0.0388889
Ormdl1	0.194878	0.130148	0.173913	0.331183	0.120915	0.209459	0.177778
Osgepl1	0.210468	0.149918	0.168896	0.262366	0.0784314	0.164414	0.155556
Gm28551	0.00445434	0.00164745	0	0	0.00326797	0.0045045	0
Asnsd1	0.521158	0.527183	0.657191	0.565591	0.388889	0.592342	0.472222
Dnah7a	0.00111359	0	0.00167224	0	0	0.0045045	0.00277778
Stk17b	0.223831	0.0906096	0.122074	0.232258	0.218954	0.132883	0.186111
Hecw2	0.0144766	0.0131796	0.0267559	0.0215054	0.00326797	0.0135135	0.0416667
Ccdc150	0.00222717	0	0	0	0.00326797	0	0.00277778
Gtf3c3	0.182628	0.159802	0.158863	0.184946	0.186275	0.177928	0.186111
Pgap1	0.0556793	0.0362438	0.0869565	0.0817204	0.0294118	0.0788288	0.05
Ankrd44	0.217149	0.191104	0.158863	0.210753	0.124183	0.182432	0.127778
Sf3b1	2.69042	2.58814	2.44816	2.76129	2.4183	2.6036	2.22222
Coq10b	0.606904	0.38056	0.439799	0.729032	0.428105	0.891892	0.544444
Hspd1	3.74722	2.38715	2.32943	6.7957	3.46078	2.79505	2.21667
Hspe1	6.30624	4.33937	4.25753	9.43656	8.81699	4.58108	4.91389
Mob4	0.908686	0.873147	0.83612	1.04301	0.901961	0.878378	0.830556
Rftn2	0.146993	0.0807249	0.0401338	0.0623656	0.0457516	0.0427928	0.233333
Gm10561	0.124722	0.0444811	0.0384615	0.088172	0.0751634	0.027027	0.166667
Mars2	0.0556793	0.0115321	0.0334448	0.088172	0.0620915	0.0382883	0.0305556
Plcl1	0.119154	0.209226	0.152174	0.0946237	0.0718954	0.0855856	0.0277778
Satb2	0.00334076	0.00329489	0	0.00430108	0	0	0.00277778
4930558J18Rik	0.0100223	0.00988468	0.0133779	0.0731183	0.0228758	0.0225225	0.0277778
1700066M21Rik	0.0601336	0.0444811	0.0384615	0.0903226	0.0588235	0.0472973	0.0666667
Tyw5	0.257238	0.207578	0.192308	0.316129	0.130719	0.268018	0.2
Maip1	0.517817	0.401977	0.471572	0.513978	0.343137	0.452703	0.469444
Spats2l	0.547884	0.803954	0.720736	0.488172	0.552288	0.511261	0.147222
Kctd18	0.110245	0.0691928	0.107023	0.131183	0.0718954	0.128378	0.0833333
Sgo2a	0.091314	0.133443	0.103679	0.52043	0.143791	0.168919	0.0944444
Aox1	0.0734967	0.112026	0.09699	0.0537634	0.0620915	0.0720721	0.0305556
Aox3	0.423163	0.364086	0.533445	0.436559	0.248366	0.236486	0.0388889
Aox4	0.00445434	0.00494234	0.0150502	0.00215054	0.0228758	0.0112613	0.00277778
Bzw1	2.9922	2.41845	3.0786	3.84516	2.97059	2.96847	2.71667
Clk1	0.53118	0.652389	0.526756	0.419355	0.581699	0.511261	0.555556
Ppil3	0.581292	0.481054	0.536789	0.623656	0.418301	0.563063	0.522222
Nif3l1	0.467706	0.334432	0.354515	0.419355	0.176471	0.364865	0.308333
Orc2	0.180401	0.0955519	0.190635	0.352688	0.22549	0.209459	0.172222
Gm15834	0.00111359	0.00658979	0.0183946	0.00645161	0.00326797	0.0045045	0
Fam126b	0.162584	0.128501	0.110368	0.124731	0.0882353	0.146396	0.102778
Ndufb3	1.73385	1.61944	1.65886	1.92043	2.4902	2.10811	1.60278
Als2cr12	0.0200445	0.00494234	0.0117057	0.0344086	0.00653595	0.0157658	0.00277778
Cflar	0.393096	0.38056	0.443144	0.365591	0.506536	0.412162	0.441667
Casp8	0.680401	0.560132	0.622074	0.965591	0.54902	0.743243	0.602778
Trak2	0.129176	0.0724876	0.0986622	0.148387	0.183007	0.186937	0.177778
Stradb	0.14922	0.123558	0.148829	0.105376	0.0490196	0.184685	0.138889
Tmem237	0.514477	0.517298	0.613712	0.636559	0.375817	0.536036	0.4
G730003C15Rik	0.0077951	0.00988468	0.0183946	0.0236559	0.00326797	0.018018	0.0138889
Mpp4	0.00111359	0	0	0.00215054	0	0.00225225	0
Als2	0.0256125	0.0197694	0.0200669	0.0451613	0.0261438	0.0225225	0.0111111
Cdk15	0.0545657	0.0543657	0.0451505	0.0322581	0.0424837	0.0045045	0.0111111
Fzd7	0.0757238	0.092257	0.155518	0.111828	0.0980392	0.173423	0.0972222
Gm973	0.00334076	0.00329489	0.00668896	0.00430108	0	0.0135135	0.00555556
Gm28411	0.00111359	0	0	0	0	0.00225225	0
Sumo1	3.85969	3.88303	3.76421	3.76129	3.10131	3.72072	3.83056
Nop58	1.28062	0.971993	0.91806	2.09892	1.02941	0.975225	0.736111
Bmpr2	0.400891	0.425041	0.287625	0.236559	0.539216	0.407658	0.355556
Fam117b	0.100223	0.0708402	0.103679	0.083871	0.0588235	0.0855856	0.113889
Ica1l	0.00222717	0.00988468	0.00167224	0.00215054	0.00326797	0	0
Wdr12	0.422049	0.390445	0.416388	0.737634	0.287582	0.326577	0.288889
Carf	0.0701559	0.0675453	0.0702341	0.0666667	0.0424837	0.0675676	0.0861111
Nbeal1	0.463252	0.408567	0.593645	0.395699	0.473856	0.957207	0.516667
Cyp20a1	0.894209	0.775947	0.787625	0.713978	0.434641	0.536036	0.997222
Abi2	0.318486	0.311367	0.287625	0.286022	0.431373	0.272523	0.338889
Raph1	0.820713	0.540362	0.712375	0.733333	1.01961	0.792793	1.08333
Cd28	0.018931	0.00823723	0.0100334	0.0430108	0.0163399	0.0540541	0.00555556
Icos	0.00111359	0.00329489	0.00501672	0.00430108	0	0.00675676	0
Pard3b	0.0668151	0.0823723	0.09699	0.0989247	0.0261438	0.128378	0.0888889
Nrp2	0.126949	0.0395387	0.125418	0.150538	0.20915	0.560811	0.138889
Gm4208	0.00111359	0.00494234	0.0183946	0.00645161	0.00653595	0.0427928	0
Ino80d	0.18931	0.15486	0.17893	0.165591	0.19281	0.211712	0.163889
Ino80dos	0.00556793	0.00658979	0.00668896	0.0107527	0	0.00675676	0.00277778
Gm20342	0.0289532	0.0345964	0.0334448	0.0258065	0.0228758	0.045045	0.0527778
Ndufs1	0.525612	0.423394	0.481605	0.548387	0.398693	0.490991	0.497222
Eef1b2	5.92316	5.98023	4.93478	5.12473	8.09804	4.53378	4.86389
Gpr1	0.00445434	0.00164745	0.0083612	0	0.00326797	0.0202703	0
Zdbf2	0.158129	0.207578	0.200669	0.12043	0.0882353	0.43018	0
Adam23	0.182628	0.204283	0.162207	0.103226	0.0849673	0.162162	0.144444
Fastkd2	0.19265	0.15486	0.182274	0.268817	0.0784314	0.189189	0.125
Gm13749	0	0	0.00167224	0.00430108	0	0	0.00277778
Klf7	0.482183	0.68369	0.389632	0.309677	0.434641	0.369369	0.583333
Gm26649	0	0	0	0	0	0	0.00555556
Creb1	0.257238	0.205931	0.235786	0.23871	0.25817	0.247748	0.275
Mettl21a	0.365256	0.278418	0.352843	0.28172	0.173203	0.324324	0.405556
Gm29152	0	0	0.00167224	0	0.00326797	0.00225225	0
Ccnyl1	0.164811	0.0823723	0.110368	0.178495	0.166667	0.135135	0.141667
Fzd5	0.0100223	0.0230643	0.0384615	0.0451613	0.0457516	0.0495495	0.025
Plekhm3	0.0334076	0.0181219	0.0267559	0.0172043	0.0261438	0.045045	0.0305556
Akr1cl	0	0.00164745	0	0	0	0.00225225	0.00277778
D630023F18Rik	0.00111359	0	0.00167224	0.00215054	0.00326797	0.0045045	0
Idh1	1.15145	1.30148	1.67057	0.789247	0.797386	1.16892	1.41389
Pikfyve	0.113586	0.0906096	0.0752508	0.113978	0.143791	0.168919	0.172222
Map2	0.00445434	0.00494234	0.00668896	0.0150538	0.00326797	0.0045045	0.00277778
Rpe	0.344098	0.199341	0.356187	0.374194	0.343137	0.353604	0.269444
Kansl1l	0.143653	0.131796	0.125418	0.101075	0.117647	0.130631	0.113889
Acadl	0.688196	0.90939	1.02508	0.922581	0.493464	0.864865	0.663889
Myl1	0.00445434	0.00823723	0.00668896	0.0172043	0.00653595	0.00900901	0
Lancl1	0.355234	0.413509	0.349498	0.2	0.143791	0.373874	0.347222
Cps1	0.00222717	0.00988468	0.00167224	0	0	0	0.00277778
Ikzf2	0.0991091	0.0873147	0.103679	0.0580645	0.0620915	0.119369	0.0722222
Bard1	0.0178174	0.0230643	0.0250836	0.103226	0.0228758	0.0225225	0.0194444
Atic	0.561247	0.425041	0.508361	1.10538	0.388889	0.601351	0.419444
Fn1	25.5167	19.6507	18.1639	16.5398	31.2124	9.83333	18.7
Apol7d	0.00668151	0.0115321	0.0117057	0.0129032	0.00326797	0.0292793	0.00277778
Gm8883	0.00890869	0.00164745	0.00334448	0.0301075	0.00326797	0.0045045	0
Gm28818	0.0167038	0.00494234	0.0100334	0.0193548	0.00653595	0.00225225	0
4933417E11Rik	0.00111359	0.00164745	0	0.00215054	0	0	0
Gm4319	0	0	0.00167224	0.00430108	0.00326797	0	0
Mreg	0	0	0.00501672	0.00860215	0.00653595	0.0045045	0
D230017M19Rik	0.0256125	0.0181219	0.0117057	0.0107527	0.00653595	0.018018	0.0138889
Pecr	0.300668	0.266886	0.20903	0.253763	0.101307	0.247748	0.241667
Tmem169	0.00556793	0	0.00167224	0.00430108	0.00326797	0.00225225	0
Xrcc5	0.357461	0.436573	0.404682	0.367742	0.127451	0.441441	0.213889
March4	0	0	0.00167224	0	0	0	0
Smarcal1	0.0957684	0.0543657	0.0919732	0.111828	0.0816993	0.0833333	0.0972222
Rpl37a	44.3686	48.8303	39.4749	36.2086	74.5327	30.0248	41.0694
Igfbp2	0.0100223	0.0263591	0.0301003	0.027957	0.00653595	0.0135135	0.0166667
Igfbp5	0.0790646	0.24547	3.54013	0.316129	0.30719	4.7545	0.233333
6030407O03Rik	0.00445434	0.0164745	0.105351	0.027957	0.00326797	0.0630631	0.00277778
Gm29183	0	0	0.00167224	0	0	0	0
Tns1	0.438753	0.140033	0.152174	0.180645	0.300654	0.211712	0.297222
Rufy4	0.00556793	0	0	0	0	0	0.00277778
Cxcr2	0.00334076	0.00329489	0.00334448	0.0150538	0.00326797	0	0.00833333
Arpc2	10.2127	8.55354	11.1906	11.2925	7.61111	12.0923	9.11111
Gpbar1	0.116927	0.0230643	0.0468227	0.0666667	0.0130719	0.0945946	0.0194444
Aamp	2.1069	2.07908	2.1689	1.88602	1.55229	2.11486	1.73611
Pnkd	0.973274	1.00824	1.17391	0.937634	0.856209	1.26126	0.894444
Tmbim1	0.328508	0.334432	0.521739	0.473118	0.27451	0.813063	0.233333
Catip	0.0734967	0.0461285	0.0518395	0.0344086	0.0424837	0.0540541	0.0583333
Slc11a1	0.0144766	0	0.00334448	0.0193548	0	0.00225225	0.0222222
Ctdsp1	0.361915	0.482702	0.520067	0.333333	0.297386	0.509009	0.4
Usp37	0.136971	0.0889621	0.105351	0.195699	0.196078	0.128378	0.152778
Cnot9	0.151448	0.107084	0.117057	0.260215	0.163399	0.182432	0.0972222
Plcd4	0.00222717	0	0.00167224	0.00430108	0.00326797	0	0
Zfp142	0.0623608	0.0510708	0.0618729	0.0774194	0.0326797	0.0405405	0.0777778
Bcs1l	0.206013	0.191104	0.259197	0.268817	0.0784314	0.245495	0.155556
Rnf25	0.293987	0.23229	0.237458	0.232258	0.107843	0.252252	0.244444
Stk36	0.0289532	0.00823723	0.0150502	0.0215054	0.0228758	0.0292793	0.0166667
Ttll4	0.0801782	0.0444811	0.0301003	0.0752688	0.0294118	0.0563063	0.075
Cyp27a1	0.0200445	0.0280066	0.0317726	0.027957	0.00980392	0.0135135	0.0305556
Prkag3	0.00668151	0.00823723	0.0117057	0.0172043	0.00653595	0.00900901	0
Wnt6	0.0178174	0.00988468	0.0100334	0.00860215	0.00980392	0.0202703	0.0166667
Wnt10a	0	0.00164745	0	0.00645161	0	0.0045045	0.00833333
Cdk5r2	0.00111359	0	0	0	0	0	0.00277778
Nhej1	0.125835	0.0790774	0.0936455	0.148387	0.0686275	0.121622	0.0888889
Slc23a3	0.00445434	0.00494234	0.0100334	0.00215054	0.00980392	0.466216	0.00277778
Cnppd1	0.36637	0.446458	0.538462	0.354839	0.277778	0.756757	0.327778
Retreg2	0.426503	0.490939	0.556856	0.384946	0.251634	0.716216	0.411111
Zfand2b	0.395323	0.354201	0.521739	0.443011	0.235294	0.513514	0.402778
Abcb6	0.0757238	0.0362438	0.0769231	0.0795699	0.0196078	0.0608108	0.0611111
Atg9a	0.151448	0.100494	0.155518	0.103226	0.0784314	0.141892	0.147222
Ankzf1	0.198218	0.156507	0.187291	0.150538	0.0359477	0.211712	0.141667
Glb1l	0.0723831	0.092257	0.0869565	0.0645161	0.0228758	0.155405	0.0777778
Stk16	0.523385	0.448105	0.570234	0.658065	0.398693	0.65991	0.513889
Tuba4a	0.389755	0.487644	0.525084	1.13978	0.362745	0.551802	0.108333
Dnajb2	0.155902	0.0939044	0.14214	0.210753	0.0882353	0.227477	0.177778
Ptprn	0.410913	0.143328	0.130435	0.217204	0.199346	0.0698198	0.186111
Resp18	0	0	0	0	0	0	0
Dnpep	1.8608	1.58814	1.71405	1.45161	1.37582	1.54955	2.13611
Des	1.95212	0.444811	0.954849	2.10538	0.571895	0.524775	3.11111
Speg	0.265033	0.248764	0.205686	0.193548	0.0947712	0.0765766	0.194444
Gmppa	0.923163	0.713344	0.852843	0.830108	0.496732	0.752252	1.08611
Chpf	0.688196	0.502471	0.546823	0.374194	0.594771	0.662162	0.980556
Obsl1	0.388641	0.207578	0.225753	0.288172	0.186275	0.218468	0.313889
Tmem198	0.00890869	0.00658979	0.00668896	0.00430108	0	0.0112613	0.00277778
Inha	0.0256125	0.0164745	0.0250836	0.0129032	0.00326797	0.0563063	0.025
Stk11ip	0.0400891	0.0263591	0.0401338	0.0451613	0.0294118	0.0630631	0.05
Slc4a3	0.0512249	0.0510708	0.102007	0.0623656	0.0457516	0.0990991	0.0555556
Epha4	0.282851	0.276771	0.219064	0.249462	0.261438	0.261261	0.0638889
Sgpp2	0.00556793	0.00494234	0.0117057	0.00860215	0.00326797	0.0112613	0
Gm28410	0.00556793	0	0.00167224	0.00215054	0.00326797	0	0
Farsb	0.613586	0.4514	0.486622	0.793548	0.392157	0.56982	0.458333
Mogat1	0.00445434	0.00164745	0.0167224	0.00430108	0	0.0788288	0
Acsl3	0.187082	0.0939044	0.110368	0.165591	0.130719	0.13964	0.194444
Utp14b	0.0334076	0.0164745	0.0133779	0.0193548	0.0196078	0.0382883	0.025
Kcne4	0.0289532	0.0313015	0.0217391	0.0344086	0.0163399	0.0292793	0.025
Scg2	0.00111359	0	0.00167224	0	0	0.00225225	0
Ap1s3	0.0300668	0.0214168	0.048495	0.0709677	0.0261438	0.13964	0
Wdfy1	0.187082	0.0873147	0.09699	0.148387	0.114379	0.0855856	0.277778
Mrpl44	0.377506	0.359143	0.367893	0.404301	0.20915	0.423423	0.297222
Serpine2	0.30735	0.3229	0.244147	0.339785	0.424837	0.247748	0.772222
Cul3	0.331849	0.278418	0.316054	0.382796	0.506536	0.306306	0.394444
Dock10	0.0334076	0.0477759	0.0334448	0.0666667	0.0261438	0.0157658	0.0333333
Irs1	0.05902	0.0362438	0.083612	0.0408602	0.0522876	0.0518018	0.138889
Rhbdd1	0.05902	0.0510708	0.0735786	0.0989247	0.0588235	0.0945946	0.0638889
Col4a4	0.0167038	0.00988468	0.0301003	0.0494624	0.0163399	0.123874	0.00833333
Col4a3	0.00334076	0.00329489	0.00668896	0.00860215	0	0.045045	0
Mff	0.982183	0.850082	0.938127	0.88172	0.673203	1.10811	1.04722
Agfg1	0.402004	0.263591	0.397993	0.503226	0.415033	0.689189	0.269444
A030005L19Rik	0.00556793	0.00494234	0	0.00430108	0.00326797	0.00675676	0.00277778
Slc19a3	0	0.00329489	0.00501672	0	0	0	0.00277778
Ccl20	0	0	0.00334448	0	0.00326797	0	0.00277778
Sphkap	0	0.00164745	0.00167224	0.00215054	0	0	0
Pid1	0.0668151	0.0856672	0.0685619	0.0731183	0.0392157	0.0653153	0.2
Dner	0.00222717	0.00164745	0	0	0	0	0
Trip12	0.7049	0.602965	0.595318	0.509677	1.14379	0.664414	0.769444
Fbxo36	0.268374	0.187809	0.219064	0.236559	0.114379	0.240991	0.172222
C130026I21Rik	0.00222717	0.00494234	0.00668896	0.00215054	0.00326797	0	0
A530032D15Rik	0.00111359	0.00494234	0	0.00215054	0	0.00225225	0
A530040E14Rik	0.00222717	0.00823723	0.00167224	0	0	0.00225225	0
Sp110	0.359688	0.472817	0.474916	0.230108	0.186275	0.572072	0.313889
Sp140	0.252784	0.291598	0.337793	0.156989	0.111111	0.313063	0.194444
Sp100	0.66147	0.866557	1.05184	0.419355	0.591503	1.19595	0.652778
A630001G21Rik	0.0334076	0.0313015	0.0301003	0.027957	0.00980392	0.0157658	0.00555556
Cab39	0.301782	0.194399	0.289298	0.322581	0.405229	0.378378	0.311111
Itm2c	1.97216	2.69357	1.8612	0.974194	1.26471	1.53604	2.19722
2810459M11Rik	0.00334076	0	0.00167224	0.00645161	0.00326797	0.00900901	0.00833333
Psmd1	1.44209	1.10544	1.30936	1.82366	1.30719	1.49775	1.125
Htr2b	0.0233853	0.00164745	0.00167224	0	0	0.00225225	0
Gm21972	0.00111359	0	0	0	0	0	0
Armc9	0.213808	0.108731	0.145485	0.116129	0.0686275	0.153153	0.127778
B3gnt7	0.0155902	0.00494234	0.0150502	0.00215054	0.00653595	0.117117	0
Gm28626	0.00111359	0.00329489	0	0.00645161	0	0.018018	0
Ncl	4.10245	3.41186	3.22241	7.52043	4.61765	3.27477	2.70556
Ptma	27.7628	30.2257	33.6789	41.828	32.2157	37.5833	20.8111
Pde6d	0.67706	0.634267	0.765886	0.733333	0.464052	0.70045	1.02778
Cops7b	0.18931	0.156507	0.152174	0.245161	0.120915	0.209459	0.186111
Nppc	0.309577	0.280066	0.471572	0.221505	0.160131	0.036036	0.161111
Dis3l2	0.153675	0.102142	0.132107	0.146237	0.117647	0.103604	0.141667
Alppl2	0.0222717	0.00658979	0.0635452	0.0666667	0.0196078	0.126126	0.00277778
Ecel1	0.0356347	0.0247117	0.132107	0.0666667	0.0163399	0.0698198	0.0138889
Prss56	0.00556793	0.00494234	0.0083612	0.0107527	0	0.00900901	0
Eif4e2	2.37305	1.71499	1.98997	2.30108	1.61765	1.61486	2.31111
Efhd1	0.0289532	0.0197694	0.0250836	0.0537634	0.0261438	0.027027	0.0638889
Gigyf2	0.377506	0.324547	0.29097	0.341935	0.336601	0.333333	0.272222
3110079O15Rik	0.00222717	0	0.00167224	0	0	0.00225225	0
Ngef	0.0879733	0.0675453	0.103679	0.0967742	0.0359477	0.0833333	0.127778
Neu2	0.00111359	0.00164745	0.00167224	0	0	0	0.00277778
Atg16l1	0.142539	0.0971993	0.168896	0.150538	0.114379	0.164414	0.102778
Sag	0.0311804	0.0280066	0.0217391	0.0537634	0.0130719	0.0112613	0.0166667
Dgkd	0.0679287	0.0675453	0.0702341	0.124731	0.0816993	0.0810811	0.0361111
Usp40	0.208241	0.205931	0.202341	0.169892	0.20915	0.184685	0.175
Ugt1a7c	0.0400891	0.0971993	0.0501672	0.0537634	0.00653595	0.0292793	0.0138889
Ugt1a6b	0	0.00329489	0.00501672	0.00860215	0.00653595	0.0045045	0
Ugt1a6a	0.0111359	0.0411862	0.0250836	0.00645161	0.0130719	0.0112613	0.00555556
Dnajb3	0.128062	0.0444811	0.0886288	0.113978	0.0555556	0.162162	0.152778
Mroh2a	0.00890869	0.0214168	0.0284281	0.0107527	0.00326797	0.0135135	0.0166667
Hjurp	0.367483	0.481054	0.411371	0.584946	0.444444	0.376126	0.444444
Spp2	0	0.00164745	0	0.00215054	0	0	0.00277778
Glrp1	0.00556793	0	0	0.00645161	0.00326797	0	0.00555556
Gm19589	0.013363	0	0.00167224	0.0129032	0.00980392	0	0.0166667
Arl4c	0.328508	0.108731	0.0869565	0.197849	0.235294	0.0788288	0.413889
Platr5	0.00222717	0	0	0.00215054	0	0	0
Sh3bp4	0.160356	0.135091	0.259197	0.376344	0.284314	0.382883	0.111111
Agap1	0.185969	0.131796	0.242475	0.352688	0.447712	0.403153	0.291667
Gbx2	0.0267261	0.00988468	0.00501672	0.0258065	0.00653595	0.0045045	0.0472222
Ackr3	0.585746	0.543657	0.794314	0.494624	0.362745	1.27252	0.180556
Gm28721	0	0	0	0	0	0	0
Gm28723	0.00890869	0.00329489	0.00668896	0.00860215	0	0.0112613	0.00277778
Gm28722	0.00334076	0	0	0	0	0.00675676	0
Cops8	0.994432	0.920923	1.04515	1.49032	0.594771	1.01126	1.05833
Col6a3	1.17706	0.861614	0.48495	0.615054	1.59477	0.297297	4.78611
Mlph	0.0122494	0.0115321	0.00668896	0.0602151	0.0228758	0.045045	0.00277778
Rab17	0	0	0.00167224	0	0	0.0112613	0
Lrrfip1	0.700445	0.313015	0.359532	0.71828	0.29085	0.551802	0.7
Rbm44	0.0077951	0.00988468	0.00167224	0.0193548	0.00326797	0.00900901	0.00277778
Ramp1	0.0824053	0.118616	0.118729	0.0516129	0.0261438	0.398649	0.194444
Ube2f	0.73608	0.499176	0.565217	0.817204	0.529412	0.842342	0.808333
Scly	0.096882	0.0939044	0.107023	0.154839	0.0359477	0.128378	0.186111
Espnl	0.00111359	0.00164745	0	0	0.00326797	0	0
Klhl30	0.00111359	0	0	0.00215054	0	0.0135135	0
Erfe	0.00890869	0.00164745	0.00167224	0.00430108	0.00653595	0.0112613	0.0111111
Ilkap	0.870824	0.7743	0.913043	0.987097	0.836601	0.943694	0.969444
Hes6	0.463252	0.444811	0.585284	0.490323	0.215686	0.662162	0.405556
Per2	0.0579065	0.0362438	0.0317726	0.0365591	0.0653595	0.045045	0.0194444
Traf3ip1	0.0712695	0.07743	0.0752508	0.141935	0.0686275	0.0720721	0.0583333
Asb1	0.0857461	0.0444811	0.048495	0.116129	0.0849673	0.0720721	0.0861111
Gm29100	0.00111359	0	0	0	0	0.00225225	0.00555556
Twist2	0.109131	0.092257	0.0785953	0.131183	0.104575	0.0810811	0.483333
Hdac4	0.0890869	0.121911	0.108696	0.141935	0.130719	0.15991	0.0944444
Gm26720	0.00222717	0.00164745	0.00501672	0.00430108	0	0.00225225	0
Ndufa10	1.58797	1.44646	1.44983	1.72473	1.08824	1.60586	1.28056
Cops9	3.32628	3.13344	3.15385	2.87312	5.87908	3.27252	3.72778
Gpc1	0.064588	0.0131796	0.0200669	0.088172	0.0653595	0.0315315	0.0833333
Ankmy1	0.00222717	0.00164745	0.00167224	0.00215054	0	0.00225225	0.00277778
Dusp28	0.0768374	0.0593081	0.0785953	0.105376	0.0294118	0.11036	0.0611111
5033417F24Rik	0.00111359	0.00329489	0.00167224	0	0	0.00225225	0
Rnpepl1	0.230512	0.135091	0.347826	0.266667	0.169935	0.414414	0.238889
9430060I03Rik	0.0100223	0.00329489	0.0100334	0.0107527	0	0.0157658	0
Capn10	0.151448	0.131796	0.182274	0.187097	0.104575	0.121622	0.169444
Gpr35	0.0100223	0	0.00167224	0.00860215	0.00980392	0.00225225	0.00833333
Kif1a	0.0077951	0.00329489	0.00668896	0.00430108	0	0.00675676	0.00833333
Agxt	0	0	0	0	0	0.00225225	0.0111111
Crocc2	0.00222717	0.00329489	0.00167224	0.00430108	0	0	0.0222222
Sned1	0.0991091	0.304778	0.17893	0.055914	0.0849673	0.0225225	0.197222
Mterf4	0.214922	0.197694	0.200669	0.180645	0.127451	0.166667	0.166667
Gm28535	0.00222717	0.00494234	0.00668896	0.00215054	0	0.0045045	0
Pask	0.0122494	0.0164745	0.0183946	0.0774194	0.0228758	0.0247748	0.025
Ppp1r7	0.678174	0.673806	0.73913	0.873118	0.375817	0.558559	0.588889
Ano7	0.0222717	0.0131796	0.0167224	0.0150538	0.0163399	0.0112613	0.00833333
Hdlbp	2.62361	1.771	2.06522	2.05161	2.61438	1.70045	2.83889
2002-09-01	0.0935412	0.0461285	0.0618729	0.139785	0.0686275	0.0405405	0.0805556
Farp2	0.0657016	0.029654	0.0535117	0.0516129	0.0326797	0.036036	0.0722222
Stk25	0.765033	0.771005	0.894649	0.604301	0.411765	0.813063	1.02778
Bok	1.36748	0.652389	1.41973	2.89032	1.13399	1.92568	1.26944
Thap4	0.349666	0.334432	0.478261	0.322581	0.120915	0.434685	0.275
Atg4b	0.438753	0.38715	0.473244	0.490323	0.267974	0.515766	0.466667
Dtymk	1.9265	1.69028	1.74415	3.68602	3.2549	1.75	1.64167
Ing5	0.202673	0.163097	0.17893	0.283871	0.215686	0.20045	0.166667
D2hgdh	0.0824053	0.0675453	0.113712	0.107527	0.0653595	0.105856	0.0666667
Gal3st2	0.00334076	0	0.00334448	0.00215054	0	0.00900901	0
Gal3st2b	0	0	0	0	0	0	0
Gal3st2c	0.00111359	0	0.00334448	0	0	0.0045045	0
Pdcd1	0.00222717	0.00329489	0.0200669	0.0172043	0	0.137387	0
Fam174a	0.449889	0.490939	0.602007	0.412903	0.395425	0.711712	0.438889
D1Ertd622e	0.202673	0.189456	0.309365	0.402151	0.199346	0.209459	0.0694444
Ppip5k2	0.100223	0.0790774	0.133779	0.195699	0.130719	0.15991	0.1
Gin1	0.178174	0.144975	0.17893	0.230108	0.120915	0.234234	0.166667
Pam	0.886414	1.27842	1.06689	0.812903	1.24837	1.36036	1.37778
Gm7967	0.00556793	0	0.00334448	0.00215054	0	0.0045045	0
Rnf152	0.00445434	0.00329489	0	0.00860215	0	0.0225225	0.0305556
Gm17634	0.00222717	0	0	0	0	0	0
Pign	0.14922	0.131796	0.145485	0.167742	0.107843	0.173423	0.108333
2310035C23Rik	0.234967	0.16145	0.197324	0.262366	0.313725	0.245495	0.222222
Tnfrsf11a	0.0233853	0.00658979	0.0351171	0.0494624	0.00980392	0.0405405	0.00555556
Gm7160	0.0256125	0.0345964	0.0334448	0.0473118	0.0163399	0.0563063	0.025
Zcchc2	0.0612472	0.0461285	0.0551839	0.0774194	0.114379	0.0698198	0.0722222
Phlpp1	0.0367483	0.0345964	0.048495	0.055914	0.0457516	0.0495495	0.0527778
A530053M12Rik	0.00445434	0	0.00501672	0.00645161	0	0	0
Bcl2	0.0935412	0.0906096	0.0685619	0.0860215	0.0620915	0.0608108	0.0611111
Kdsr	0.2049	0.16145	0.175585	0.208602	0.107843	0.209459	0.213889
Vps4b	0.77951	0.637562	0.866221	0.810753	0.869281	0.869369	0.741667
Serpinb5	0.0534521	0.0313015	0.122074	0.625806	0.140523	0.594595	0.00833333
Serpinb11	0.00445434	0.0329489	0.083612	0.0150538	0.00980392	0.0112613	0
Serpinb7	0	0.00658979	0.00668896	0	0	0	0
Serpinb2	7.62027	3.00494	2.13545	6.8043	3.51634	0.779279	0.541667
Serpinb8	0.077951	0.187809	0.197324	0.126882	0.0424837	0.173423	0.0305556
Cdh19	0.00334076	0.00329489	0.00167224	0.00215054	0.00326797	0	0.00277778
Gm29088	0	0	0	0	0	0	0.00277778
Dsel	0.206013	0.158155	0.177258	0.184946	0.124183	0.166667	0.269444
Cntnap5a	0	0	0	0	0.00326797	0	0
Tsn	2.52116	2.37068	2.27759	2.70753	2.39542	2.12838	2.38333
Nifk	0.57461	0.540362	0.548495	0.896774	0.454248	0.531532	0.516667
Clasp1	0.155902	0.116969	0.152174	0.172043	0.179739	0.164414	0.233333
2900060B14Rik	0.0345212	0.0329489	0.041806	0.0387097	0.00980392	0.0292793	0.0222222
Tfcp2l1	0.0122494	0.0263591	0.0735786	0.0473118	0.0359477	0.141892	0
Gli2	0.0356347	0.0362438	0.0317726	0.0602151	0.0228758	0.0923423	0.0416667
Inhbb	0.0412027	0.0197694	0.0501672	0.0537634	0.0522876	0.0382883	0.166667
Ralb	0.518931	0.474465	0.643813	0.470968	0.356209	0.536036	0.633333
Gm27184	0.00222717	0	0.00167224	0.00430108	0	0.0045045	0
Tmem185b	0.288419	0.21911	0.237458	0.305376	0.189542	0.263514	0.272222
Epb41l5	0.0155902	0.0329489	0.0384615	0.0387097	0.0163399	0.0653153	0.0166667
Ptpn4	0.0378619	0.0313015	0.0468227	0.0709677	0.0424837	0.0563063	0.0194444
Tmem177	0.114699	0.0939044	0.130435	0.180645	0.0359477	0.168919	0.0805556
Tmem37	0.385301	0.598023	0.973244	0.769892	0.160131	0.574324	0.211111
Dbi	5.96325	12.0577	11.1839	7.4129	10.8301	13.9437	7.475
3110009E18Rik	0.187082	0.189456	0.158863	0.208602	0.124183	0.198198	0.125
Steap3	0.0946548	0.118616	0.0719064	0.0774194	0.0359477	0.0855856	0.827778
En1	0.134744	0.0131796	0.0250836	0.0494624	0.0653595	0.018018	0.338889
Gm29346	0.0111359	0.00329489	0.00334448	0.0150538	0.0163399	0.0045045	0.00833333
Insig2	0.644766	0.805601	1.03846	0.683871	0.526144	1.36937	1.05278
2210011K15Rik	0.00445434	0	0.00668896	0.0172043	0	0.0247748	0.00277778
Ccdc93	0.123608	0.0955519	0.145485	0.135484	0.0915033	0.112613	0.133333
Htr5b	0.00334076	0	0	0.0215054	0	0.0045045	0
Ddx18	0.880846	0.657331	0.625418	1.24086	0.95098	0.808559	0.641667
1700121L03Rik	0.00222717	0	0	0	0	0	0
Actr3	2.72717	1.69852	2.31605	3.23226	2.28431	2.42117	3.225
Slc35f5	0.449889	0.398682	0.414716	0.245161	0.160131	0.391892	0.430556
Gpr39	0.815145	0.604613	0.635452	1.03011	0.477124	0.637387	0.463889
Lypd1	0.0178174	0.0263591	0.0468227	0.0193548	0.0130719	0.0495495	0.0305556
Nckap5	0.0144766	0.0164745	0.0668896	0.0322581	0.0130719	0.0405405	0.0111111
Mgat5	0.077951	0.0461285	0.0769231	0.0860215	0.117647	0.0878378	0.0694444
Tmem163	0.00111359	0.00494234	0.0167224	0.0193548	0	0.0315315	0
2900009J06Rik	0.0211581	0.0247117	0.00668896	0.0258065	0.0228758	0.018018	0.0166667
Ccnt2	0.337416	0.266886	0.366221	0.324731	0.264706	0.497748	0.363889
Map3k19	0.00111359	0	0	0	0	0	0
Rab3gap1	0.269488	0.263591	0.297659	0.290323	0.24183	0.317568	0.252778
Zranb3	0.0334076	0.029654	0.0167224	0.0602151	0.0359477	0.0337838	0.0444444
Gm28800	0.00668151	0.00164745	0.00167224	0.00430108	0	0.0045045	0.0138889
R3hdm1	0.57461	0.429984	0.408027	0.51828	0.457516	0.497748	0.611111
Ubxn4	2.08463	1.8715	2.10368	2.0086	1.53595	2.24324	1.86667
Lct	0.00556793	0	0	0.00645161	0.00326797	0	0
Mcm6	0.878619	0.891269	0.998328	2.16559	0.888889	0.817568	0.711111
Dars	1.29176	1.11038	1.199	1.47097	0.718954	1.01126	0.983333
Cxcr4	0.00890869	0.00329489	0.0083612	0.00645161	0.00653595	0.0045045	0.0111111
Thsd7b	0.00556793	0.00164745	0.00334448	0.00430108	0.00326797	0.00225225	0.00277778
Gm15675	0.0389755	0.0313015	0.0919732	0.0752688	0.0784314	0.0427928	0.0138889
Cd55	0.883073	1.26853	2.86789	2.45376	1.25817	2.99324	0.177778
Gm16083	0.00334076	0.00164745	0	0.00215054	0	0	0
Pfkfb2	0.018931	0.0115321	0.0217391	0.0129032	0.0130719	0.0225225	0.0277778
Yod1	0.162584	0.0971993	0.11204	0.172043	0.0849673	0.13964	0.141667
AA986860	0.0256125	0.00988468	0.0150502	0.0150538	0.00980392	0.0202703	0.00277778
Gm28857	0.00556793	0.00658979	0.00501672	0.00215054	0.00653595	0.00225225	0.0111111
Fcmr	0.00556793	0.00164745	0.00167224	0.00645161	0.00326797	0.00675676	0
Il19	0.00111359	0.00164745	0.0183946	0	0	0	0
Il10	0.00668151	0	0.00167224	0.00215054	0	0.0157658	0
Mapkapk2	0.237194	0.120264	0.20903	0.268817	0.277778	0.373874	0.236111
Dyrk3	0.0311804	0.0230643	0.0551839	0.122581	0.0130719	0.117117	0.0194444
Eif2d	0.393096	0.354201	0.416388	0.425806	0.189542	0.463964	0.363889
Rassf5	0.0334076	0.029654	0.041806	0.0365591	0.0522876	0.0382883	0.0527778
Ikbke	0.0979955	0.115321	0.123746	0.109677	0.0686275	0.119369	0.0944444
Gm28913	0.00445434	0	0.00334448	0.00215054	0.00326797	0.00675676	0
Srgap2	0.211581	0.228995	0.304348	0.260215	0.19281	0.324324	0.236111
Fam72a	0.0734967	0.0609555	0.0735786	0.111828	0.0620915	0.0540541	0.0666667
Rab7b	0.318486	0.421746	0.546823	0.288172	0.245098	0.443694	0.4
Pm20d1	0.00445434	0.00329489	0.00167224	0	0	0	0.00277778
Slc41a1	0.0857461	0.0444811	0.0702341	0.0774194	0.0620915	0.0945946	0.111111
Rab29	0.160356	0.169687	0.148829	0.116129	0.104575	0.166667	0.180556
Nucks1	1.14699	0.886326	1.05351	2.1957	2.30392	1.3018	1.36389
Slc45a3	0.113586	0.0971993	0.0936455	0.178495	0.0751634	0.103604	0.0638889
Elk4	0.227171	0.189456	0.205686	0.206452	0.326797	0.254505	0.319444
Mfsd4a	0.0233853	0.0164745	0.0334448	0.0301075	0.0261438	0.027027	0.0305556
Cdk18	0.0256125	0.00658979	0.0150502	0.0172043	0.00980392	0.0247748	0.0166667
Klhdc8a	0.0890869	0.0181219	0.153846	0.367742	0.0490196	0.466216	0.0194444
Nuak2	0.0868597	0.0329489	0.0568562	0.124731	0.0424837	0.108108	0.0972222
Tmcc2	0.0300668	0.0131796	0.0117057	0.0215054	0.0228758	0.0540541	0.0527778
Dstyk	0.174833	0.118616	0.122074	0.150538	0.19281	0.175676	0.152778
Rbbp5	0.077951	0.0477759	0.0685619	0.124731	0.0882353	0.0585586	0.0555556
Tmem81	0.00445434	0.00329489	0.0083612	0.00860215	0.0163399	0.00225225	0.00833333
Cntn2	0.00222717	0	0.00167224	0	0	0	0
Nfasc	0.0512249	0.0856672	0.0167224	0.0215054	0.0392157	0.0112613	0.025
Lrrn2	0.592428	0.718287	0.501672	0.329032	0.294118	0.227477	0.388889
Mdm4	0.290646	0.263591	0.292642	0.249462	0.232026	0.265766	0.236111
Pik3c2b	0.0100223	0	0	0.00645161	0.00653595	0.00675676	0.00555556
Ppp1r15b	0.226058	0.14168	0.192308	0.247312	0.388889	0.245495	0.238889
Plekha6	0.0334076	0.00658979	0.0284281	0.0645161	0.0261438	0.132883	0.0166667
Ren1	0.00111359	0.00329489	0.00167224	0	0	0.00900901	0.00833333
Etnk2	0.0167038	0	0.0919732	0.0322581	0.00653595	0.0630631	0.0138889
Sox13	0.0167038	0.00988468	0.0083612	0.027957	0.00980392	0.0157658	0.0583333
Snrpe	4.56682	3.72323	3.5301	5.93978	7.62745	3.62838	4.27778
Gm26706	0.00334076	0	0	0	0	0.00225225	0
Zc3h11a	0.0256125	0.0181219	0.0267559	0.0344086	0.0326797	0.0382883	0.0222222
Gm38394	0.00668151	0	0.00501672	0.00215054	0.00326797	0	0.00555556
Lax1	0.00445434	0	0.00501672	0.00860215	0.00980392	0.00225225	0.00555556
Atp2b4	0.35412	0.199341	0.327759	0.419355	0.464052	0.283784	0.411111
Optc	0.064588	0.0131796	0.0117057	0.0258065	0.0228758	0.018018	0.122222
Prelp	0.157016	0.578254	0.506689	0.247312	0.147059	0.558559	0.283333
Fmod	0.229399	0.102142	0.0535117	0.0258065	0.00653595	0.25	0.0638889
Btg2	5.73163	10.0972	4.01338	1.8086	2.32353	5.4482	3.62222
Chil1	0.0902004	0.481054	0.551839	0.178495	0.0326797	2.85586	0.025
Mybph	0.00111359	0	0.00334448	0.00430108	0	0.0045045	0.00277778
Adora1	0	0	0	0	0	0.018018	0
Ppfia4	0.00556793	0.00988468	0.00501672	0.00430108	0.00653595	0.00675676	0.00277778
Tmem183a	0.545657	0.425041	0.506689	0.731183	0.359477	0.547297	0.522222
Cyb5r1	0.249443	0.14168	0.195652	0.316129	0.186275	0.236486	0.177778
Adipor1	1.31403	1.02636	1.13545	1.21935	0.846405	1.28829	1.35833
Klhl12	0.155902	0.108731	0.133779	0.195699	0.107843	0.112613	0.133333
Rabif	0.437639	0.285008	0.414716	0.4	0.238562	0.378378	0.491667
Kdm5b	0.91314	0.729819	0.588629	0.447312	0.588235	0.56982	0.947222
Syt2	0	0	0.00167224	0.00215054	0	0	0
Ppp1r12b	0.110245	0.0955519	0.133779	0.152688	0.0751634	0.144144	0.202778
Ube2t	0.121381	0.179572	0.0936455	0.425806	0.186275	0.146396	0.0805556
Lgr6	0.00890869	0.00494234	0.00334448	0.0129032	0.0163399	0.00225225	0.00833333
Ptpn7	0.0167038	0.00494234	0.00334448	0.0172043	0.00326797	0	0
Arl8a	0.414254	0.209226	0.317726	0.374194	0.539216	0.353604	0.411111
Gm15445	0.00445434	0.00823723	0.0083612	0.00860215	0.00980392	0.00675676	0.00833333
Elf3	0.00890869	0	0.00501672	0.0172043	0	0.0202703	0
Rnpep	0.604677	0.421746	0.521739	0.56129	0.205882	0.5	0.525
Timm17a	2.00557	1.46458	1.47324	2.66452	1.91176	1.82207	2.13611
Lmod1	0.0334076	0.00329489	0.00501672	0.00860215	0.00326797	0.00675676	0.169444
Shisa4	0.553452	0.196046	0.459866	0.909677	0.20915	0.59009	0.6
Ipo9	0.318486	0.24547	0.280936	0.356989	0.326797	0.236486	0.344444
Nav1	0.58686	0.392092	0.376254	0.406452	0.5	0.182432	1.10278
Gm4793	0.00334076	0	0.00334448	0	0	0.00225225	0
Gm38399	0.101336	0.0708402	0.0652174	0.0731183	0.0424837	0.027027	0.152778
Csrp1	3.0657	0.980231	1.44983	2.38065	1.40196	2.3018	4.34167
Phlda3	1.60802	1.29489	1.23077	1.69247	0.993464	1.3491	1.96944
Tnni1	0.297327	0.105437	0.0785953	0.152688	0.0849673	0.211712	0.0333333
Tnnt2	0.213808	0.196046	0.188963	0.195699	0.0686275	0.398649	0.175
Tmem9	0.977728	1.26194	0.9699	0.567742	0.48366	0.68018	0.966667
Kif21b	0.0579065	0.0197694	0.0167224	0.0387097	0.0424837	0.0292793	0.105556
Mroh3	0	0.00164745	0.00334448	0.00215054	0.00326797	0	0
5730559C18Rik	0.243875	0.0889621	0.0953177	0.167742	0.0947712	0.0855856	0.0944444
Camsap2	0.141425	0.121911	0.125418	0.137634	0.173203	0.175676	0.136111
Ddx59	0.0812918	0.062603	0.0869565	0.109677	0.0326797	0.0968468	0.0416667
Kif14	0.0345212	0.0280066	0.0351171	0.148387	0.0718954	0.0247748	0.0416667
Gm37799	0.0144766	0.0214168	0.00501672	0.00430108	0.00326797	0	0
Zfp281	0.604677	0.512356	0.322742	0.324731	0.542484	0.346847	0.322222
Gm19705	0.32294	0.291598	0.254181	0.331183	0.22549	0.265766	0.111111
Platr22	0.0434298	0.0197694	0.0250836	0.055914	0.0163399	0.045045	0.00833333
A430106G13Rik	0.0178174	0.0115321	0.00668896	0.00430108	0.00653595	0.00675676	0.0111111
Ptprc	0.00111359	0	0.00167224	0.00215054	0	0	0.00277778
Gm28556	0	0	0	0	0	0	0.00277778
Nek7	0.475501	0.509061	0.580268	0.584946	0.395425	0.668919	0.333333
Lhx9	0.0100223	0	0.0083612	0.00860215	0.00326797	0.0225225	0.00277778
2310009B15Rik	0.601336	0.504119	0.605351	0.509677	0.702614	0.612613	0.463889
Dennd1b	0.108018	0.100494	0.100334	0.122581	0.127451	0.162162	0.0722222
Zbtb41	0.120267	0.0906096	0.0936455	0.141935	0.117647	0.135135	0.130556
Aspm	0.0623608	0.103789	0.11204	0.32043	0.199346	0.0900901	0.0638889
Gm4788	0.00668151	0	0.00167224	0.00215054	0	0.00225225	0.00277778
Cfhr2	0.0167038	0.014827	0.0133779	0.00430108	0.00653595	0.00900901	0.00833333
Cfh	2.20379	3.53048	2.93144	0.866667	1.9281	5.1509	1.13889
Kcnt2	0.0412027	0.0395387	0.0351171	0.0387097	0.0424837	0.112613	0.0416667
Cdc73	0.261693	0.186161	0.220736	0.234409	0.330065	0.252252	0.191667
B3galt2	0.00556793	0.00164745	0	0	0	0.00675676	0
Glrx2	1.25947	1.15321	1.28094	1.24731	1.24183	1.24099	1.13056
Trove2	0.315145	0.250412	0.382943	0.326882	0.464052	0.443694	0.238889
Uchl5	0.615813	0.53542	0.586957	1.37419	0.614379	0.603604	0.441667
Rgs2	0.141425	0.286656	0.0652174	0.0645161	0.107843	0.119369	0.0555556
Rgs18	0.0122494	0.0181219	0.0150502	0.0107527	0.00326797	0.027027	0.00833333
Brinp3	0.0167038	0.00164745	0.0083612	0.0107527	0.00980392	0.00675676	0.225
Pla2g4a	0.80735	0.630972	0.782609	0.625806	0.395425	0.637387	0.891667
Ptgs2	0.439866	0.184514	0.123746	0.146237	0.509804	0.166667	0.219444
Ptgs2os2	0.00890869	0	0.00167224	0.00430108	0	0	0.00277778
BC003331	0.535635	0.52883	0.576923	0.408602	0.339869	0.506757	0.452778
Tpr	1.96771	1.8682	1.92642	2.32473	1.78758	1.96622	1.70556
Prg4	0.167038	0.555189	1.2408	0.298925	0.294118	2.25901	0.105556
Hmcn1	0.0601336	0.21911	0.27592	0.253763	0.196078	0.414414	0.0583333
Gm20631	0	0	0.00167224	0.00430108	0	0	0
Gm10138	0.100223	0.0428336	0.083612	0.088172	0.0392157	0.0427928	0.0666667
Ivns1abp	0.541203	0.327842	0.342809	0.578495	0.398693	0.493243	0.425
Swt1	0.359688	0.275124	0.280936	0.247312	0.24183	0.308559	0.261111
Trmt1l	0.249443	0.21911	0.252508	0.23871	0.166667	0.292793	0.244444
Rnf2	0.339644	0.278418	0.285953	0.245161	0.140523	0.220721	0.441667
Fam129a	0.132517	0.0807249	0.173913	0.15914	0.0980392	0.20045	0.319444
2810414N06Rik	0.013363	0.00658979	0.0167224	0.0107527	0.00980392	0.0135135	0.00833333
Edem3	0.0812918	0.0444811	0.0518395	0.111828	0.124183	0.0900901	0.116667
1700025G04Rik	0.368597	0.304778	0.550167	0.612903	0.326797	0.641892	0.611111
Tsen15	0.498886	0.406919	0.428094	0.604301	0.333333	0.436937	0.497222
Colgalt2	0.00445434	0.00658979	0.00501672	0.0150538	0.00653595	0.0135135	0.00555556
Rgl1	0.217149	0.126853	0.102007	0.135484	0.0882353	0.0698198	0.2
Arpc5	4.05345	2.97035	3.73579	4.46022	3.19935	3.87162	4.29722
Ncf2	0.0211581	0.0131796	0.0351171	0.0258065	0.00326797	0.0427928	0.00555556
Smg7	0.112472	0.092257	0.118729	0.152688	0.179739	0.112613	0.0972222
Nmnat2	0.0278396	0.00494234	0.00167224	0.00860215	0.0228758	0.00900901	0.0138889
Lamc2	0.173719	0.0543657	0.190635	0.356989	0.137255	0.380631	0.15
Lamc1	0.722717	0.62603	0.976589	0.847312	1.18301	1.0991	1.13611
Shcbp1l	0.00111359	0	0.00501672	0	0.00653595	0	0.00277778
Dhx9	0.35412	0.299835	0.332776	0.43871	0.702614	0.364865	0.358333
Npl	1.2049	1.45634	0.493311	0.662366	0.25817	0.144144	0.438889
Rgs16	0.169265	0.159802	0.0284281	0.0215054	0.0359477	0.00900901	0.163889
Rnasel	0.194878	0.436573	0.23913	0.11828	0.150327	0.227477	0.0944444
Rgsl1	0.00668151	0.0131796	0.00501672	0.00215054	0	0.00225225	0
Teddm2	0.00445434	0.00823723	0.00668896	0.0172043	0.00326797	0.0112613	0.0111111
Glul	0.644766	1.04942	0.882943	0.492473	0.323529	1.27027	0.516667
Cacna1e	0	0	0.00167224	0	0	0	0.00555556
Gm9530	0.00222717	0.00329489	0.00167224	0.00430108	0.00653595	0.00900901	0.00833333
Ier5	1.09465	0.883031	0.866221	0.83871	0.885621	0.918919	0.966667
Mr1	0.108018	0.136738	0.170569	0.103226	0.0326797	0.144144	0.166667
Stx6	0.403118	0.275124	0.344482	0.339785	0.281046	0.364865	0.402778
BC034090	0.112472	0.0510708	0.0869565	0.109677	0.0620915	0.119369	0.0777778
Xpr1	0.231626	0.248764	0.207358	0.234409	0.228758	0.236486	0.258333
Gm5532	0.00890869	0.00823723	0.0083612	0.00215054	0.00980392	0.00225225	0.0111111
Acbd6	0.681514	0.647446	0.680602	0.731183	0.460784	0.709459	0.655556
Qsox1	0.816258	0.482702	0.471572	0.378495	0.434641	0.504505	0.775
Cep350	0.100223	0.0494234	0.09699	0.15914	0.124183	0.101351	0.0944444
Tor1aip1	0.747216	0.817133	1.03512	0.903226	0.852941	1.02477	0.694444
Tor1aip2	1.27394	0.853377	1.11873	1.13978	1.08497	1.62838	1.02222
Fam163a	0.00111359	0	0	0.00215054	0	0.00675676	0
Tdrd5	0.00222717	0.00164745	0.00167224	0.00215054	0.00326797	0	0
Nphs2	0.00111359	0.00329489	0	0.00430108	0	0	0
Axdnd1	0.0233853	0.0131796	0.0167224	0.0107527	0.00980392	0	0
Gm2000	2.93096	3.11038	2.46656	2.42151	3.27778	1.8491	2.525
Soat1	2.28396	1.57825	1.54013	1.57419	1.77124	0.936937	0.872222
Gm10031	0.0478842	0.0378913	0.0384615	0.0537634	0.0228758	0.0382883	0.0305556
Abl2	0.165924	0.120264	0.145485	0.2	0.316993	0.175676	0.183333
Tor3a	0.383073	0.408567	0.600334	0.363441	0.202614	0.398649	0.425
Fam20b	0.123608	0.0873147	0.120401	0.116129	0.186275	0.130631	0.147222
Ralgps2	0.159243	0.0477759	0.0585284	0.322581	0.22549	0.148649	0.133333
Angptl1	0.018931	0.0181219	0.0150502	0.0387097	0.0130719	0.0112613	0.222222
Tex35	0.00111359	0	0	0	0	0	0
Rasal2	0.131403	0.0593081	0.0869565	0.103226	0.0620915	0.148649	0.0972222
Cryzl2	0.270601	0.257002	0.274247	0.169892	0.0522876	0.189189	0.472222
Gm15486	0	0.00164745	0.00501672	0.00215054	0	0.00225225	0
Sec16b	0.173719	0.0741351	0.125418	0.135484	0.133987	0.0810811	0.225
Brinp2	0.00334076	0	0.00334448	0	0	0.00225225	0
Astn1	0.00111359	0.00164745	0.0100334	0	0	0.0045045	0
Pappa2	0.00668151	0	0	0	0.00326797	0.0045045	0.00277778
Cop1	0.423163	0.308072	0.354515	0.376344	0.415033	0.466216	0.436111
Tnr	0	0.00329489	0.00167224	0.00215054	0	0	0.00277778
4930523C07Rik	0.202673	0.352554	0.280936	0.210753	0.212418	0.288288	0.280556
4930562F07Rik	0.00890869	0.00823723	0.00334448	0.00215054	0	0	0.00555556
Tnn	0.11804	0.00823723	0.0167224	0.0494624	0.0784314	0.0112613	0.386111
Mrps14	3.41648	3.18451	3.35619	3.72473	4.13725	3.22748	3.36389
Cacybp	1.75947	1.23723	1.60368	3.10323	1.71895	2.17793	1.57778
Rabgap1l	0.199332	0.247117	0.349498	0.182796	0.140523	0.682432	0.213889
Gm36975	0	0	0	0	0.00326797	0	0
Rc3h1	0.164811	0.169687	0.17893	0.232258	0.264706	0.240991	0.188889
Serpinc1	0.0144766	0.00329489	0.00167224	0.0107527	0.00653595	0.0045045	0.00833333
Zbtb37	0.0890869	0.0609555	0.0752508	0.0623656	0.0718954	0.0698198	0.0972222
Dars2	0.114699	0.121911	0.0886288	0.234409	0.0588235	0.146396	0.075
Gm37634	0.00556793	0	0	0.00430108	0	0	0.00555556
Cenpl	0.114699	0.121911	0.0886288	0.354839	0.120915	0.13964	0.122222
Klhl20	0.103563	0.0724876	0.117057	0.141935	0.0751634	0.0945946	0.113889
Ankrd45	0	0	0.00167224	0.00215054	0	0	0
Prdx6	3.35412	1.43987	1.8311	3.36989	2.44118	2.47748	1.94167
Tnfsf4	0.045657	0.00164745	0.00668896	0.0430108	0.0326797	0.0202703	0.00555556
Tnfsf18	0.00334076	0	0	0	0	0.00675676	0
Suco	0.14922	0.107084	0.14214	0.189247	0.153595	0.27027	0.161111
4930558K02Rik	0	0.00164745	0	0	0.00326797	0	0
Pigc	0.389755	0.248764	0.301003	0.268817	0.196078	0.286036	0.375
Gm38304	0.00222717	0	0	0.00430108	0.00326797	0	0
Dnm3	0.0501114	0.0247117	0.0117057	0.0451613	0.0163399	0.0225225	0.0527778
2810442N19Rik	0.00445434	0.00164745	0.00167224	0	0	0.00225225	0.00277778
Dnm3os	0.262806	0.0955519	0.0551839	0.0537634	0.120915	0.0315315	0.313889
Mettl13	0.123608	0.0856672	0.0685619	0.148387	0.0261438	0.0675676	0.0861111
Vamp4	0.679287	0.566722	0.622074	0.541935	0.267974	0.626126	0.719444
Myoc	0.0289532	0.0313015	0.0133779	0.0258065	0	0.0495495	0.0138889
Prrc2c	1.30846	1.15815	1.25585	1.32688	1.3366	1.11036	0.980556
Fmo4	0.00556793	0.00658979	0.00501672	0.0129032	0	0.0045045	0.00277778
Fmo1	0.0478842	0.0494234	0.0367893	0.0215054	0.0130719	0.0135135	0.0333333
Fmo2	0.229399	0.352554	0.312709	0.0903226	0.0751634	0.61036	0.0138889
Fmo3	0.00222717	0.00164745	0.00167224	0	0	0	0
Prrx1	1.83296	1.42669	1.02174	1.02151	1.54575	0.400901	2.325
Gm26523	0.321826	0.210873	0.113712	0.0989247	0.0816993	0.0247748	0.227778
Gorab	0.291759	0.164745	0.277592	0.275269	0.222222	0.22973	0.244444
Kifap3	0.522272	0.436573	0.461538	0.346237	0.369281	0.470721	0.455556
Scyl3	0.0991091	0.0823723	0.0919732	0.116129	0.0784314	0.105856	0.0805556
BC055324	0.0790646	0.0856672	0.0618729	0.251613	0.0555556	0.0653153	0.0833333
Mettl18	0.091314	0.0675453	0.0702341	0.111828	0.0326797	0.0698198	0.0472222
Sele	0.00334076	0.00494234	0.00167224	0.00215054	0.00326797	0	0.0111111
Selp	0.00445434	0.00164745	0.00167224	0.00430108	0	0.0157658	0.00555556
F5	0.00668151	0.0181219	0.0150502	0.00430108	0.00326797	0.00675676	0.00555556
Slc19a2	0.05902	0.0411862	0.0501672	0.0688172	0.0359477	0.0698198	0.0444444
Ccdc181	0.126949	0.174629	0.265886	0.212903	0.0686275	0.301802	0.0972222
Blzf1	0.33853	0.21911	0.267559	0.273118	0.150327	0.236486	0.272222
Nme7	0.317372	0.253707	0.307692	0.283871	0.156863	0.265766	0.327778
Atp1b1	2.11693	3.39374	3.20736	1.95054	1.45752	4.67568	1.08611
Gm26685	0	0.00823723	0.00167224	0.00215054	0	0.0045045	0
Gm37754	0.00334076	0.00164745	0.00334448	0.00430108	0.00980392	0.00225225	0
Dpt	1.01225	1.13839	0.797659	0.901075	1.81699	0.876126	13.2444
Gm32569	0	0	0.00167224	0.00215054	0.00326797	0	0
Xcl1	0.00445434	0	0	0.0193548	0	0	0.0388889
Sft2d2	0.195991	0.257002	0.367893	0.324731	0.143791	0.509009	0.0805556
Tiprl	0.97216	0.850082	0.862876	0.976344	0.620915	0.855856	1.075
Gpr161	0.0434298	0.0230643	0.0117057	0.0516129	0.0424837	0.0292793	0.0527778
Dcaf6	0.259465	0.29654	0.289298	0.180645	0.179739	0.202703	0.244444
Mpc2	1.93764	1.86491	1.92809	1.55054	2.16013	2.26351	2.06944
Adcy10	0.00111359	0.00164745	0	0.00215054	0	0	0.00555556
Mpzl1	0.717149	0.341021	0.287625	0.326882	0.346405	0.254505	0.652778
Rcsd1	0.064588	0.0560132	0.0602007	0.027957	0.0261438	0.126126	0.0166667
Creg1	2.26503	3.0346	5.49666	3.6086	3.5098	7.80405	1.51389
Pou2f1	0.0801782	0.0658979	0.0735786	0.0924731	0.0326797	0.0765766	0.0805556
Dusp27	0.00668151	0.00494234	0	0	0	0.00225225	0.00277778
Mael	0.00111359	0.00329489	0.00334448	0.00430108	0	0.00225225	0.00277778
Ildr2	0.433185	0.639209	0.998328	0.726882	0.69281	1.00225	0.211111
Gm15853	0.0155902	0.00494234	0.0183946	0.00645161	0.00653595	0.0045045	0.0138889
Tada1	0.402004	0.321252	0.317726	0.303226	0.202614	0.313063	0.305556
Pogk	0.123608	0.0593081	0.0802676	0.109677	0.0588235	0.0765766	0.105556
Gm16701	0.0434298	0.0345964	0.0317726	0.0236559	0.0228758	0.018018	0.025
Gm16701.1	0.0077951	0.00494234	0.00501672	0.00215054	0.00980392	0.0112613	0.00277778
Fam78b	0.173719	0.140033	0.0535117	0.111828	0.0653595	0.135135	0.075
Uck2	0.41314	0.230643	0.220736	0.574194	0.264706	0.45045	0.272222
Gm2453	0	0	0	0.00215054	0	0	0
Tmco1	2.7706	2.94399	2.80602	2.50108	2.68301	2.80631	2.2
Aldh9a1	0.44098	0.354201	0.520067	0.584946	0.251634	0.513514	0.333333
Mgst3	0.353007	0.423394	0.757525	0.56129	0.238562	1.04279	0.294444
Rxrg	0.00222717	0.00658979	0	0.00645161	0	0.00675676	0.00277778
Lmx1a	0	0	0	0	0.00326797	0	0
Gm20711	0	0.00164745	0	0.00215054	0	0.00225225	0
Pbx1	1.07572	1.42175	1.56522	0.978495	2.04248	1.71847	1.27778
Nuf2	0.210468	0.189456	0.192308	0.64086	0.254902	0.168919	0.227778
Rgs5	0.0244989	0.0181219	0.0117057	0.0193548	0.0196078	0.0653153	0.00833333
Rgs4	0.0501114	0.0527183	0.0802676	0.15914	0.0490196	0.155405	0.0166667
Hsd17b7	0.108018	0.0576606	0.0986622	0.174194	0.0980392	0.126126	0.183333
3110045C21Rik	0.0378619	0.0378913	0.0267559	0.0774194	0.0359477	0.045045	0.0611111
Ddr2	0.326281	0.385502	0.386288	0.303226	0.431373	0.261261	0.958333
Uap1	1.21938	1.08731	4.25418	3.03656	1.6634	8.33108	1.575
Gm37748	0	0	0	0.00215054	0	0.00225225	0
Gm37502	0.00111359	0	0.00334448	0	0	0.00225225	0
Uhmk1	0.0979955	0.100494	0.145485	0.189247	0.153595	0.191441	0.0916667
4930500M09Rik	0.00111359	0	0.00334448	0	0	0	0
Gm7694	0.013363	0.0230643	0.0200669	0.0129032	0.00653595	0.0698198	0.00277778
Nos1ap	0.0211581	0.0477759	0.0652174	0.0301075	0.00980392	0.20045	0.00833333
Olfml2b	0.670379	1.0313	1.62375	0.563441	0.849673	0.894144	1.29167
Atf6	0.119154	0.0724876	0.12709	0.163441	0.114379	0.186937	0.102778
Dusp12	0.505568	0.285008	0.265886	0.326882	0.297386	0.272523	0.388889
Gm26620	0.0434298	0.00823723	0.0133779	0.0430108	0.00980392	0.0225225	0.0444444
Fcrlb	0.00334076	0.00164745	0	0	0	0	0
Fcgr2b	0.0367483	0.0988468	0.0133779	0.0215054	0.00653595	0.00675676	0.00833333
Gm10522	0.00111359	0	0	0	0.00326797	0	0
Fcgr4	0.0300668	0.0280066	0.0451505	0.0387097	0.00980392	0.0247748	0
Fcgr3	0.120267	0.0444811	0.0317726	0.0688172	0.0359477	0.0315315	0.0555556
Cfap126	0.0334076	0.0362438	0.0200669	0.0236559	0.00326797	0.0157658	0.0111111
Sdhc	1.23942	1.28007	1.33278	1.32903	0.964052	1.29955	1.19444
Pcp4l1	0.0077951	0.00329489	0.00167224	0.00645161	0.00326797	0.00225225	0.00555556
Tomm40l	0.178174	0.143328	0.172241	0.294624	0.124183	0.177928	0.141667
Apoa2	0.0489978	0.0131796	0.0267559	0.0301075	0.0294118	0.0315315	0.0222222
Fcer1g	0.0412027	0.0444811	0.0351171	0.0236559	0.0261438	0.0495495	0.0277778
Ndufs2	2.01002	1.82702	2.1806	2.25591	1.36928	2.40541	1.675
Adamts4	0.368597	0.235585	0.125418	0.12043	0.202614	0.0540541	0.669444
B4galt3	0.276169	0.16145	0.150502	0.187097	0.137255	0.18018	0.236111
Ppox	0.193764	0.171334	0.212375	0.197849	0.0751634	0.213964	0.152778
Usp21	0.115813	0.0691928	0.0869565	0.122581	0.0751634	0.0968468	0.105556
Ufc1	2.15813	2.08896	2.34615	1.81935	1.9281	1.93919	2.425
Gm20045	0.0222717	0.0214168	0.0284281	0.0215054	0.0130719	0.0382883	0.0333333
Dedd	0.305122	0.220758	0.220736	0.253763	0.19281	0.27027	0.263889
Nit1	0.262806	0.306425	0.366221	0.294624	0.173203	0.369369	0.202778
Pfdn2	2.21938	2.30643	2.19398	2.97419	3.08497	2.40315	2.01389
Klhdc9	0.0077951	0.00329489	0	0.00430108	0.00326797	0.0045045	0.00555556
Nectin4	0.121381	0.00823723	0.0317726	0.144086	0.0359477	0.0765766	0.0527778
Arhgap30	0	0	0.00334448	0	0	0	0
Usf1	0.227171	0.209226	0.324415	0.24086	0.124183	0.272523	0.188889
Tstd1	0.00222717	0.00494234	0.00668896	0.00215054	0.00326797	0.0135135	0.00277778
F11r	1.28508	0.917628	1.94314	2.47097	0.986928	3.26577	0.116667
B930036N10Rik	0.0924276	0.0313015	0.048495	0.105376	0.0784314	0.018018	0.0444444
Alyref2	0.374165	0.271829	0.362876	0.296774	0.196078	0.362613	0.294444
Cd244	0.0924276	0.0230643	0.0685619	0.11828	0.0359477	0.29955	0
Ly9	0.0155902	0.00494234	0.0133779	0.027957	0.00326797	0.018018	0.00555556
Cd48	0.00222717	0.00164745	0	0.00215054	0	0	0
Slamf1	0.0077951	0.00658979	0.0100334	0.0172043	0.00980392	0.00675676	0.00833333
Cd84	0.00222717	0.00329489	0.00167224	0.00215054	0.00653595	0.0045045	0.00833333
Gm37065	0.00222717	0	0.00167224	0	0	0.00225225	0
Vangl2	0.114699	0.0939044	0.0769231	0.0967742	0.124183	0.0495495	0.130556
Ncstn	0.635857	0.634267	0.690635	0.511828	0.395425	0.725225	0.7
Copa	1.61024	1.37891	1.49164	1.06452	1.6634	1.26351	1.91667
Gm37756	0.00111359	0.00164745	0	0	0.00326797	0	0
Pex19	0.596882	0.499176	0.556856	0.56129	0.303922	0.585586	0.716667
Dcaf8	0.501114	0.599671	0.568562	0.333333	0.25817	0.542793	0.502778
Pea15a	0.799555	0.919275	1.01672	0.716129	0.529412	0.885135	1.01111
Casq1	0.0100223	0.00494234	0.00334448	0.00215054	0	0	0
Gm17224	0.00111359	0.00329489	0	0	0	0	0
Atp1a4	0.0100223	0.00329489	0.00167224	0	0	0.00225225	0.00555556
Igsf8	0.792873	0.967051	0.983278	0.980645	0.666667	0.849099	1.37778
Atp1a2	0.0857461	0.280066	0.0869565	0.0688172	0.0261438	0.130631	0.0444444
Pigm	0.14588	0.0971993	0.150502	0.195699	0.104575	0.153153	0.125
Slamf9	0.0423163	0.0329489	0.0267559	0.0344086	0.0228758	0.0225225	0.0138889
Igsf9	0.0701559	0.0313015	0.048495	0.0451613	0.0392157	0.0675676	0.0166667
Tagln2	13.6225	7.10708	8.95318	19.4774	11.0065	10.1689	11.6111
Cfap45	0.164811	0.0906096	0.100334	0.243011	0.147059	0.101351	0.0555556
Vsig8	0.228285	0.235585	0.242475	0.232258	0.101307	0.0855856	0.025
Slamf8	0.0200445	0.0247117	0.0150502	0.0322581	0.00980392	0.00675676	0.025
Dusp23	0.497773	0.482702	0.525084	0.378495	0.189542	0.400901	0.488889
Ackr1	0.0144766	0.00823723	0.0267559	0.0301075	0.00980392	0.00675676	0.00833333
Cadm3	0.0634744	0.0378913	0.167224	0.163441	0.0588235	0.0698198	0.0916667
Aim2	0.0167038	0.00494234	0.00334448	0.0193548	0.00980392	0	0.00555556
Ifi206	0.00222717	0.00164745	0.00167224	0.00215054	0	0.00225225	0
Ifi213	0	0	0	0	0	0	0
Ifi208	0	0	0	0	0	0	0
Ifi207	0.0412027	0.0873147	0.0735786	0.0387097	0.0424837	0.0247748	0.127778
Ifi204	1.49109	2.91763	2.26923	1.61505	1.34967	1.70045	1.26111
Mndal	0.834076	2.06096	1.77926	0.834409	0.820261	1.27477	0.85
Ifi211	0.786192	1.23394	1.00836	0.75914	0.640523	0.97973	0.725
Ifi203	0.482183	1.30807	1.06355	0.365591	0.545752	0.698198	0.530556
Ifi205	0.769488	1.62438	1.26421	0.746237	0.584967	0.939189	0.544444
Spta1	0.00556793	0.00823723	0.00167224	0.0129032	0.00326797	0.00900901	0.00555556
Fmn2	0.00111359	0	0	0.00215054	0	0	0
Grem2	0.0334076	0.0428336	0.0234114	0.0408602	0.0130719	0.0045045	0.0472222
Rgs7	0.00445434	0.00329489	0.00501672	0.00215054	0	0	0.00277778
Fh1	0.730512	0.518946	0.535117	0.939785	0.346405	0.628378	0.569444
Kmo	0.00111359	0	0	0	0	0	0
Opn3	0.0445434	0.0345964	0.0735786	0.0860215	0.0261438	0.0675676	0.0694444
Chml	0.0300668	0.0164745	0.0384615	0.0580645	0.0359477	0.0630631	0.0305556
Exo1	0.0601336	0.062603	0.0401338	0.266667	0.0915033	0.0563063	0.0472222
Rbm8a2	0.077951	0.0461285	0.041806	0.12043	0.0294118	0.045045	0.0666667
Cep170	0.32294	0.171334	0.222408	0.260215	0.323529	0.182432	0.411111
Sdccag8	0.23608	0.235585	0.230769	0.204301	0.0980392	0.207207	0.227778
Akt3	0.0712695	0.0329489	0.0367893	0.0709677	0.0588235	0.0518018	0.108333
Gm26801	0	0	0	0	0	0	0
Zbtb18	0.0534521	0.0280066	0.0367893	0.0473118	0.0816993	0.0518018	0.0361111
Adss	0.629176	0.507414	0.652174	0.903226	0.431373	0.921171	0.541667
Catspere2	0.0111359	0.0115321	0.0083612	0.00645161	0.00326797	0.00900901	0.0111111
Desi2	0.979955	1.02306	0.772575	0.737634	0.921569	0.54955	1.10556
B230369F24Rik	0.00222717	0.00658979	0	0.00860215	0.00326797	0.00900901	0
Cox20	1.69599	1.92092	1.99331	1.53763	2.5817	2.20495	1.95556
Hnrnpu	2.55122	2.4827	2.69398	3.40645	3.33333	2.70946	2.26389
Efcab2	0.0746102	0.062603	0.0602007	0.0731183	0.0326797	0.0698198	0.0611111
Kif26b	0.296214	0.156507	0.140468	0.088172	0.150327	0.119369	0.127778
Smyd3	0.216036	0.187809	0.198997	0.189247	0.111111	0.13964	0.155556
Tfb2m	0.380846	0.233937	0.295987	0.367742	0.29085	0.247748	0.227778
Cnst	0.0579065	0.0345964	0.0451505	0.0602151	0.0620915	0.045045	0.0583333
Sccpdh	0.427617	0.2257	0.245819	0.294624	0.254902	0.283784	0.366667
Ahctf1	0.190423	0.151565	0.115385	0.268817	0.284314	0.175676	0.197222
Cdc42bpa	0.311804	0.151565	0.215719	0.251613	0.300654	0.301802	0.283333
Coq8a	0.0567929	0.0675453	0.0518395	0.0236559	0.0163399	0.0698198	0.0194444
Psen2	0.429844	0.614498	0.767559	0.666667	0.330065	0.63964	0.313889
Gm31728	0.00111359	0.00164745	0.00167224	0.00215054	0	0.00225225	0
Itpkb	0.120267	0.118616	0.117057	0.0946237	0.143791	0.162162	0.147222
Parp1	0.501114	0.423394	0.498328	0.769892	0.51634	0.481982	0.466667
Lin9	0.0657016	0.0642504	0.048495	0.169892	0.104575	0.0675676	0.0583333
Mixl1	0.00334076	0	0	0.00430108	0	0	0.00555556
Acbd3	0.68931	0.385502	0.513378	0.565591	0.794118	0.493243	0.755556
H3f3a	5.42873	5.84679	6.20736	5.12043	5.2549	7.8964	6.16667
Gm17275	0.00334076	0.00494234	0.0083612	0.00430108	0.00980392	0.00225225	0.00833333
H3f3aos	0.00222717	0.00329489	0	0.00215054	0	0.00225225	0.00277778
Sde2	0.583519	0.545305	0.543478	0.48172	0.362745	0.531532	0.427778
Lefty2	0.013363	0.0181219	0.0819398	0.0537634	0.0196078	0.148649	0.00277778
Pycr2	0.687082	0.550247	0.695652	1.23011	0.490196	0.916667	0.530556
Lefty1	0.386414	0.375618	0.494983	0.449462	0.300654	0.540541	0.180556
Tmem63a	0.206013	0.158155	0.347826	0.365591	0.212418	0.414414	0.2
Ephx1	0.207127	0.3229	0.294314	0.232258	0.114379	0.545045	0.172222
Nvl	0.341871	0.271829	0.289298	0.326882	0.251634	0.290541	0.275
Cnih4	2.8686	2.87974	2.95151	3.4129	3.30392	3.24324	2.39722
Wdr26	0.631403	0.561779	0.652174	0.468817	1.04902	0.677928	0.691667
A430110L20Rik	0.00111359	0.00164745	0.00334448	0	0	0	0.00555556
Ccdc121	0.00334076	0	0	0	0	0	0
Lbr	0.23608	0.14827	0.210702	0.404301	0.29085	0.238739	0.233333
Enah	0.415367	0.140033	0.148829	0.335484	0.490196	0.119369	1.00833
Srp9	4.54343	3.25371	3.64548	4.66022	6.53268	3.51126	5.51944
Degs1	1.1637	1.12191	1.20569	1.46237	1.01307	1.61712	1.125
1700047M11Rik	0	0	0.00167224	0.00215054	0	0.00225225	0
Fbxo28	0.321826	0.191104	0.27592	0.419355	0.212418	0.292793	0.258333
Trp53bp2	0.168151	0.107084	0.225753	0.225806	0.238562	0.344595	0.0777778
Capn2	1.37082	0.879736	1.6388	2.04301	1.05556	1.75225	1.64722
Susd4	0.0122494	0	0.0133779	0.0150538	0	0.0405405	0.025
Tlr5	0.0178174	0.0280066	0.0719064	0.027957	0.0326797	0.0630631	0.0388889
Gm38079	0.0111359	0.00329489	0.0284281	0.00645161	0	0.0292793	0.0138889
Disp1	0.159243	0.107084	0.170569	0.221505	0.140523	0.198198	0.122222
Brox	0.213808	0.14827	0.285953	0.255914	0.19281	0.310811	0.230556
Aida	0.398664	0.395387	0.456522	0.473118	0.535948	0.441441	0.705556
Mia3	0.595768	0.520593	0.456522	0.406452	0.722222	0.493243	0.788889
Taf1a	0.0924276	0.0642504	0.0752508	0.11828	0.0359477	0.0878378	0.0916667
Gm37986	0.00222717	0.00494234	0.00167224	0.00215054	0.00326797	0	0.00277778
Dusp10	0.0857461	0.029654	0.0551839	0.0967742	0.0457516	0.0292793	0.191667
1700056E22Rik	0.0311804	0.0230643	0.0117057	0.0172043	0.0228758	0.0112613	0.0277778
Gm37800	0.013363	0.0115321	0.00334448	0.00860215	0.00653595	0	0
Hlx	0.119154	0.250412	0.137124	0.116129	0.0424837	0.018018	0.130556
Gm34342	0.0400891	0.0675453	0.0451505	0.0387097	0.0326797	0.0112613	0.05
Marc1	0.00668151	0	0	0.00215054	0	0	0
Marc2	0.825167	1.14168	1.12542	0.690323	0.676471	1.03604	0.938889
C130074G19Rik	0	0	0	0.00215054	0.00653595	0.00900901	0
Mark1	0.0412027	0.0543657	0.0501672	0.0516129	0.0392157	0.036036	0.0555556
Rab3gap2	0.153675	0.130148	0.135452	0.146237	0.147059	0.119369	0.163889
Iars2	0.243875	0.210873	0.30602	0.273118	0.166667	0.295045	0.175
Bpnt1	0.22049	0.176277	0.222408	0.464516	0.238562	0.344595	0.155556
4930532G15Rik	0.0289532	0.0378913	0.0351171	0.0129032	0.0163399	0.00675676	0.0111111
Eprs	2.28842	1.84679	1.56856	1.82796	1.65033	1.36036	2.20556
Lyplal1	0.346325	0.311367	0.30602	0.27957	0.0915033	0.277027	0.344444
Tgfb2	0.595768	0.598023	0.424749	0.348387	0.480392	0.542793	3.11667
Rrp15	0.596882	0.484349	0.451505	0.926882	0.401961	0.452703	0.458333
A430105J06Rik	0.018931	0.0164745	0.0117057	0.0129032	0.00326797	0.0135135	0.0111111
Spata17	0.00334076	0.00164745	0.00501672	0.00645161	0	0.0112613	0
1700007P06Rik	0.00111359	0	0	0	0	0	0.00555556
Gpatch2	0.128062	0.108731	0.125418	0.148387	0.147059	0.130631	0.141667
Gm37896	0	0	0	0	0	0	0
Esrrg	0	0.00329489	0	0	0.00326797	0	0
Kctd3	0.160356	0.100494	0.14214	0.184946	0.133987	0.15991	0.152778
Kcnk2	0.0556793	0.014827	0.0167224	0.083871	0.0261438	0.00900901	0.0194444
A430027H14Rik	0.00222717	0	0	0.00215054	0	0	0
Cenpf	0.321826	0.566722	0.632107	1.46237	0.957516	0.515766	0.411111
Ptpn14	0.229399	0.202636	0.262542	0.264516	0.343137	0.29955	0.102778
Gm37422	0	0.00658979	0	0.00860215	0.00326797	0	0.00277778
Smyd2	0.857461	0.706755	0.680602	1.14194	0.683007	0.673423	0.580556
Prox1	0.00445434	0	0	0.00215054	0.0130719	0.0112613	0
Rps6kc1	0.0846325	0.0461285	0.0953177	0.101075	0.0620915	0.0630631	0.105556
Angel2	0.38196	0.341021	0.396321	0.339785	0.343137	0.349099	0.4
Vash2	0.0790646	0.0230643	0.0284281	0.0451613	0.0424837	0.00675676	0.141667
Flvcr1	0.0489978	0.0543657	0.048495	0.0903226	0.0980392	0.0675676	0.0361111
A230020J21Rik	0	0.00164745	0.00334448	0	0	0.0045045	0
Tatdn3	0.111359	0.0971993	0.123746	0.113978	0.0620915	0.0788288	0.0861111
Nsl1	0.0345212	0.0263591	0.0234114	0.133333	0.0816993	0.036036	0.00833333
Batf3	0.0200445	0.0164745	0.0267559	0.0752688	0.0294118	0.0157658	0.0166667
Fam71a	0.0178174	0.0411862	0.0217391	0.0193548	0.00980392	0.036036	0.00833333
Atf3	0.317372	0.958814	0.575251	0.374194	0.235294	0.849099	0.263889
D730003I15Rik	0.0423163	0.0477759	0.0602007	0.0537634	0.0457516	0.0608108	0.0555556
Nenf	3.64588	5.34761	4.99164	2.72688	4.46078	4.73874	4.51944
Tmem206	0.0579065	0.0675453	0.0953177	0.0860215	0.0359477	0.0518018	0.0527778
Ppp2r5a	0.223831	0.30313	0.356187	0.331183	0.333333	0.414414	0.247222
Dtl	0.2049	0.177924	0.128763	0.374194	0.143791	0.148649	0.136111
Ints7	0.207127	0.169687	0.200669	0.288172	0.248366	0.123874	0.130556
Lpgat1	0.394209	0.260297	0.297659	0.350538	0.352941	0.308559	0.516667
Gm38037	0.00445434	0.0131796	0.0250836	0.0473118	0.00980392	0.0135135	0.00833333
Nek2	0.0467706	0.0560132	0.0602007	0.208602	0.0816993	0.0720721	0.0333333
1700034H15Rik	0.00334076	0	0.00334448	0.00215054	0	0.0045045	0
Slc30a1	0.0723831	0.0708402	0.120401	0.152688	0.0555556	0.193694	0.0666667
Gm26670	0.0167038	0.0247117	0.0250836	0.0129032	0.0196078	0.0292793	0.0111111
Traf5	0.207127	0.217463	0.19398	0.227957	0.133987	0.315315	0.247222
Gm26879	0.00111359	0.00164745	0	0.00215054	0.00326797	0	0
Rcor3	0.175947	0.118616	0.133779	0.141935	0.127451	0.198198	0.161111
Gm10516	0.0100223	0.00494234	0.0100334	0.00860215	0.00326797	0.018018	0.0138889
Kcnh1	0.00222717	0	0	0.00215054	0	0	0.0138889
Hhat	0.0690423	0.0444811	0.0384615	0.0473118	0.0555556	0.0405405	0.0722222
Sertad4	0.152561	0.0807249	0.103679	0.131183	0.133987	0.155405	0.127778
Gm15867	0.104677	0.0477759	0.048495	0.0623656	0.0653595	0.0698198	0.138889
Syt14	0.00111359	0	0.00167224	0.00430108	0	0.0045045	0
Diexf	0.0712695	0.0461285	0.0501672	0.101075	0.0620915	0.0518018	0.0583333
Irf6	0.00445434	0	0.00334448	0.00645161	0	0.018018	0.00277778
A130010J15Rik	0.10245	0.07743	0.0936455	0.126882	0.0457516	0.0765766	0.075
Lamb3	0.00111359	0	0.00501672	0	0	0.0112613	0.00277778
Hsd11b1	0.0445434	0.0329489	0.0434783	0.0301075	0.0196078	0.0225225	0.0333333
G0s2	0.0868597	0.0790774	0.0702341	0.124731	0.0686275	0.0720721	0.105556
4631405K08Rik	0.00334076	0.00494234	0.00668896	0	0	0	0
Plxna2	0.0757238	0.0840198	0.145485	0.225806	0.169935	0.108108	0.025
Cd34	1.19042	3.33608	4.78261	1.7957	1.54248	3.56532	1.16389
Gm16897	0	0.00164745	0	0.00215054	0	0	0
Cd46	0.00668151	0.00494234	0.0100334	0.00430108	0	0.0045045	0.0166667
Cr1l	0.750557	0.901153	0.909699	0.705376	0.473856	1.08333	0.85
Fam171a1	0.273942	0.0988468	0.157191	0.307527	0.362745	0.132883	0.336111
Nmt2	0.506682	0.332784	0.478261	0.754839	0.689542	0.47973	0.455556
Rpp38	0.266147	0.220758	0.190635	0.270968	0.19281	0.218468	0.113889
Acbd7	0.00668151	0.00164745	0	0.0193548	0	0.0045045	0
Dclre1c	0.0267261	0.0181219	0.0317726	0.0430108	0.00653595	0.0247748	0.0222222
Suv39h2	0.0734967	0.0461285	0.0434783	0.165591	0.0555556	0.0518018	0.0388889
Hspa14	0.538976	0.425041	0.553512	1	0.48366	0.632883	0.530556
Gm45902	0.0144766	0.0131796	0.0100334	0.0236559	0.00653595	0.0112613	0.0194444
Cdnf	0.00111359	0.00164745	0.00334448	0.00645161	0.00326797	0.00225225	0
Fam107b	0.0991091	0.0329489	0.0919732	0.182796	0.104575	0.288288	0.102778
Frmd4a	0.232739	0.0411862	0.0551839	0.172043	0.25817	0.0945946	0.383333
Gm13179	0	0	0	0.00215054	0	0.0045045	0
Prpf18	0.229399	0.146623	0.158863	0.2	0.248366	0.18018	0.211111
Bend7	0.0222717	0.0131796	0.0234114	0.0365591	0.0228758	0.0495495	0.00277778
Sephs1	0.287305	0.182867	0.252508	0.387097	0.189542	0.234234	0.236111
Phyh	0.524499	0.650741	0.576923	0.326882	0.333333	0.576577	0.511111
Ucma	0.00334076	0	0	0.00215054	0.00326797	0	0
Mcm10	0.0445434	0.0444811	0.0401338	0.217204	0.101307	0.0382883	0.025
Optn	0.0579065	0.100494	0.12709	0.12043	0.0555556	0.175676	0.0611111
Ccdc3	0.0100223	0.014827	0.0267559	0.0172043	0.00653595	0.0135135	0.0805556
Camk1d	0.013363	0.00494234	0.0167224	0.0301075	0.0130719	0.0337838	0.0138889
Cdc123	1.39978	1.27842	1.29264	1.56774	1.17647	1.20045	1.275
Nudt5	0.826281	0.629325	0.757525	1.31613	0.722222	0.731982	0.813889
Gm13199	0.00334076	0.00164745	0.00334448	0.00645161	0	0.00225225	0.00277778
Sec61a2	0.367483	0.365733	0.319398	0.380645	0.137255	0.231982	0.305556
Dhtkd1	0	0.00494234	0	0.00860215	0.00326797	0.0045045	0.00277778
Upf2	0.492205	0.349259	0.404682	0.363441	0.457516	0.394144	0.430556
Proser2	0.0100223	0.0280066	0.120401	0.0516129	0.00653595	0.184685	0.00555556
Echdc3	0.0467706	0.0757825	0.0618729	0.0430108	0.0130719	0.0968468	0.0166667
Usp6nl	0.0846325	0.0395387	0.0635452	0.0860215	0.114379	0.119369	0.05
Celf2	0.948775	1.9341	1.76087	0.980645	1.39869	1.94369	1.13333
Gata3	0.0334076	0.0313015	0.0234114	0.0430108	0.0163399	0.0337838	0.00277778
Taf3	0.239421	0.200988	0.232441	0.266667	0.127451	0.256757	0.191667
Atp5c1	5.20379	5.39539	4.96321	5.12903	4.21895	4.91216	4.56389
Kin	0.400891	0.331137	0.352843	0.374194	0.388889	0.364865	0.291667
Itih2	0.00556793	0.00658979	0.0117057	0.0172043	0.00653595	0.0135135	0.00555556
Itih5	0.175947	0.45799	0.356187	0.189247	0.120915	0.0743243	0.433333
Sfmbt2	0.0222717	0.0230643	0.0167224	0.00860215	0.0163399	0.0112613	0.0166667
Prkcq	0.00222717	0	0	0.00215054	0	0.00225225	0
8030442B05Rik	0.00222717	0	0.00334448	0.00430108	0.00980392	0.0045045	0
Gm13293	0.0222717	0.0197694	0.0367893	0.055914	0.0196078	0.0247748	0.00833333
Pfkfb3	0.106904	0.0444811	0.0535117	0.122581	0.0816993	0.0788288	0.075
Rbm17	1.19599	0.99341	1.08027	1.44731	1.12745	1.1036	1.18889
Il2ra	0	0	0	0	0	0	0
Il15ra	0.0701559	0.0741351	0.0652174	0.0924731	0.0228758	0.0292793	0.116667
Fbxo18	0.390869	0.294893	0.326087	0.202151	0.310458	0.263514	0.444444
Ankrd16	0.103563	0.0889621	0.120401	0.124731	0.0784314	0.119369	0.102778
Itga8	0.00222717	0.00329489	0.00334448	0.00645161	0	0.00225225	0.0111111
Mindy3	0.291759	0.172982	0.332776	0.455914	0.238562	0.695946	0.283333
Gm37565	0	0	0	0	0	0	0
Pter	0.331849	0.266886	0.354515	0.268817	0.114379	0.315315	0.197222
C1ql3	0.00445434	0.00494234	0.00167224	0.00215054	0.00326797	0.0045045	0.00555556
Rsu1	2.29065	2.16804	2.07692	1.69032	1.55882	1.95495	3.00833
Cubn	0.00668151	0.00164745	0	0.00645161	0.0130719	0.0045045	0.00277778
Trdmt1	0.0657016	0.0790774	0.0468227	0.088172	0.0392157	0.0878378	0.0472222
Vim	16.6169	12.1862	15.3495	23.6065	19.7876	19.1847	23.125
St8sia6	0	0	0	0.00430108	0.00653595	0	0.00277778
Hacd1	1.76615	1.26194	0.98495	1.81505	1.75163	0.608108	1.79722
Stam	0.160356	0.120264	0.147157	0.193548	0.137255	0.146396	0.225
Tmem236	0	0	0	0	0	0.00225225	0
Mrc1	0.0100223	0.00988468	0.00501672	0.0258065	0.00980392	0.0112613	0.00833333
Cacnb2	0.0311804	0.0345964	0.0217391	0.0602151	0.0359477	0.0540541	0.0111111
Nsun6	0.129176	0.103789	0.128763	0.182796	0.117647	0.123874	0.116667
Arl5b	0.27951	0.484349	0.280936	0.178495	0.284314	0.308559	0.216667
Plxdc2	0.39755	0.802306	1.06689	0.210753	0.19281	0.531532	1.02778
Nebl	0.0233853	0.0164745	0.0367893	0.0494624	0.00326797	0.0855856	0
A930004D18Rik	0.0757238	0.0461285	0.0719064	0.0709677	0.0359477	0.0900901	0.0416667
Skida1	0.0178174	0.0115321	0.0200669	0.0150538	0.0163399	0.018018	0.0194444
Mllt10	0.434298	0.341021	0.349498	0.397849	0.401961	0.441441	0.311111
Dnajc1	1.3363	1.45634	1.25753	0.875269	1.12092	1.46622	1.35833
Commd3	2.64811	2.46129	2.40468	2.16774	2.13072	2.75	2.39444
Bmi1	0.267261	0.189456	0.220736	0.247312	0.189542	0.209459	0.233333
Carlr	0	0	0	0	0	0.00225225	0.00277778
Pip4k2a	0.124722	0.0675453	0.105351	0.167742	0.143791	0.146396	0.130556
4930426L09Rik	0.0222717	0.00494234	0.0133779	0.00860215	0.00326797	0.0045045	0.00833333
Armc3	0.00111359	0.00329489	0	0	0	0.0045045	0
Msrb2	0.199332	0.210873	0.245819	0.189247	0.101307	0.252252	0.136111
Otud1	0.0211581	0.0461285	0.0535117	0.0430108	0.0163399	0.0472973	0.0222222
Etl4	0.100223	0.0576606	0.0585284	0.0817204	0.0228758	0.177928	0.0805556
Arhgap21	0.138085	0.0889621	0.16388	0.148387	0.205882	0.162162	0.202778
Gm13375	0.00445434	0.00164745	0.00334448	0.00215054	0	0.00225225	0.00833333
Enkur	0.0267261	0.00658979	0.0167224	0.0301075	0.00653595	0.0720721	0.025
Thnsl1	0.0623608	0.0214168	0.0434783	0.0516129	0.0261438	0.121622	0.0444444
Apbb1ip	0.593541	0.444811	0.379599	0.845161	0.464052	0.204955	0.486111
Pdss1	0.157016	0.0790774	0.100334	0.337634	0.120915	0.130631	0.0694444
Abi1	0.538976	0.565074	0.67893	0.486022	0.784314	0.754505	0.652778
Acbd5	0.365256	0.30972	0.404682	0.344086	0.316993	0.547297	0.347222
Mastl	0.0657016	0.0593081	0.0568562	0.206452	0.111111	0.0698198	0.0388889
Yme1l1	0.879733	0.889621	0.779264	0.711828	0.601307	0.765766	0.741667
Spopl	0.206013	0.163097	0.187291	0.193548	0.153595	0.198198	0.191667
Hnmt	0.00890869	0.0115321	0.0150502	0.00860215	0.00653595	0.036036	0.00277778
Il1rn	0.00222717	0	0	0.0236559	0	0.018018	0.0194444
Psd4	0.00111359	0.00164745	0	0.00860215	0	0.00675676	0
Cacna1b	0.00111359	0	0	0.00215054	0	0	0.00277778
Ehmt1	0.361915	0.349259	0.326087	0.326882	0.356209	0.295045	0.302778
Arrdc1	0.232739	0.23888	0.366221	0.305376	0.140523	0.364865	0.127778
Zmynd19	0.226058	0.120264	0.167224	0.348387	0.22549	0.177928	0.136111
Dph7	0.140312	0.136738	0.135452	0.167742	0.0686275	0.155405	0.0972222
Mrpl41	0.848552	0.678748	0.695652	1.12473	0.973856	0.885135	0.813889
Pnpla7	0.158129	0.196046	0.384615	0.212903	0.0849673	0.373874	0.0361111
Nsmf	0.151448	0.121911	0.157191	0.11828	0.0816993	0.13964	0.158333
Nrarp	0.00111359	0.00329489	0.00501672	0.00215054	0	0.0292793	0
Tor4a	0.0824053	0.0560132	0.120401	0.11828	0.0490196	0.13964	0.0194444
Nelfb	0.495546	0.406919	0.600334	0.473118	0.199346	0.565315	0.597222
Tubb4b	1.53007	1.60956	1.97157	4.05376	2.32353	3.48423	1.41667
Cysrt1	0	0	0	0.00645161	0	0.00675676	0.00277778
Rnf208	0.00222717	0.00164745	0.00334448	0	0	0.018018	0
Ndor1	0.0267261	0.0197694	0.0384615	0.0645161	0.00653595	0.027027	0.025
Tmem203	0.348552	0.365733	0.352843	0.326882	0.339869	0.468468	0.461111
Tprn	0.0567929	0.0329489	0.0585284	0.0903226	0.0392157	0.0900901	0.0527778
Ssna1	1.31403	1.39539	1.77759	2.03656	1.40196	1.71171	1.43333
Anapc2	0.544543	0.502471	0.598662	0.501075	0.366013	0.628378	0.491667
Grin1	0	0.00329489	0	0	0	0	0
AA543186	0.00222717	0.00494234	0.00334448	0.00860215	0	0.0045045	0.00555556
Man1b1	0.259465	0.23888	0.272575	0.204301	0.166667	0.27027	0.305556
Dpp7	0.160356	0.166392	0.190635	0.126882	0.0457516	0.234234	0.180556
Uap1l1	0.378619	0.507414	0.605351	0.352688	0.186275	0.695946	0.313889
Sapcd2	0.0423163	0.0543657	0.0719064	0.210753	0.0457516	0.0518018	0.0333333
Entpd2	0.139198	0.476112	0.317726	0.230108	0.133987	0.432432	0.486111
Npdc1	1.32071	1.60956	1.95987	1.31613	1.16013	2.18243	2.07222
Abca2	0.0367483	0.0313015	0.0886288	0.0537634	0.0457516	0.150901	0.0277778
Paxx	0.2951	0.281713	0.459866	0.262366	0.124183	0.554054	0.297222
Clic3	0.0167038	0.00658979	0.137124	0.0645161	0.00653595	1.2545	0.00555556
Ptgds	0.0077951	0.0131796	0.0200669	0.00860215	0	0.121622	0.00833333
C8g	0.0267261	0.0164745	0.0267559	0.0236559	0.00653595	0.0337838	0.0138889
Fbxw5	0.403118	0.408567	0.550167	0.443011	0.202614	0.623874	0.352778
Traf2	0.2951	0.283361	0.364548	0.615054	0.248366	0.344595	0.286111
Edf1	4.99777	5.11203	6.16388	7.02796	4.37255	6.24775	4.85556
Mamdc4	0	0.00164745	0	0.00215054	0	0.0045045	0
Phpt1	1.42205	1.61944	1.33779	0.911828	1.16667	0.990991	1.27222
Gm996	0.00111359	0.00988468	0	0.00215054	0	0	0
Rabl6	0.635857	0.484349	0.508361	0.630108	0.405229	0.637387	0.511111
Tmem141	0.223831	0.215815	0.287625	0.2	0.0915033	0.335586	0.230556
Lcn8	0	0	0	0	0	0	0
A230005M16Rik	0.00111359	0	0	0.00215054	0	0	0.00277778
Bmyc	0.582405	0.746293	0.61204	0.503226	0.248366	0.531532	0.563889
Camsap1	0.148107	0.138386	0.12709	0.195699	0.235294	0.155405	0.158333
Ubac1	0.508909	0.377265	0.486622	0.666667	0.375817	0.425676	0.461111
Nacc2	0.222717	0.177924	0.190635	0.197849	0.130719	0.193694	0.155556
Tmem250-ps	0.359688	0.367381	0.349498	0.354839	0.261438	0.373874	0.341667
Qsox2	0.122494	0.0609555	0.103679	0.189247	0.111111	0.148649	0.172222
Ccdc187	0	0	0.00501672	0	0	0.0135135	0
Gpsm1	0.128062	0.0807249	0.0953177	0.0946237	0.0522876	0.0698198	0.111111
Dnlz	0.886414	0.830313	0.882943	0.853763	0.856209	0.808559	1.15556
Snapc4	0.0233853	0.0461285	0.0301003	0.0322581	0.0294118	0.0315315	0.0333333
Gm13563	0	0.00164745	0.00334448	0.00215054	0	0	0
Sdccag3	0.455457	0.281713	0.322742	0.574194	0.366013	0.518018	0.363889
Pmpca	0.5902	0.462932	0.545151	0.791398	0.320261	0.581081	0.486111
Inpp5e	0.0734967	0.0823723	0.115385	0.0903226	0.0326797	0.101351	0.0916667
Sec16a	0.24833	0.169687	0.234114	0.195699	0.310458	0.238739	0.280556
Notch1	0.0489978	0.0263591	0.0267559	0.0537634	0.0294118	0.0337838	0.0666667
Egfl7	0.180401	0.0873147	0.108696	0.152688	0.0816993	0.0900901	0.0916667
Agpat2	0.424276	0.360791	0.419732	0.32043	0.150327	0.43018	0.297222
Fam69b	0.223831	0.156507	0.118729	0.133333	0.0522876	0.0923423	0.177778
Snhg7os	0.00222717	0.00164745	0.00334448	0.00645161	0	0.0135135	0
Surf6	0.129176	0.0807249	0.120401	0.146237	0.0947712	0.0945946	0.0666667
Med22	0.109131	0.0873147	0.12709	0.163441	0.0784314	0.144144	0.116667
Rpl7a	8.29065	7.77595	7.16221	8.62581	7.61438	5.89865	6.92222
Surf1	0.47216	0.497529	0.546823	0.423656	0.251634	0.574324	0.427778
Surf2	0.268374	0.242175	0.332776	0.378495	0.147059	0.335586	0.2
Surf4	3.32628	2.15815	2.39967	2.98065	2.8268	2.18919	3.275
Rexo4	0.269488	0.228995	0.282609	0.356989	0.179739	0.243243	0.258333
Adamts13	0.00222717	0	0	0	0	0	0
Cacfd1	0.351893	0.281713	0.294314	0.225806	0.205882	0.317568	0.369444
Slc2a6	0.00222717	0.00164745	0	0.00215054	0.00326797	0.00900901	0
Mymk	0	0	0.00167224	0.00215054	0	0	0
Adamtsl2	0.141425	0.0889621	0.0635452	0.0989247	0.0751634	0.0720721	0.0472222
Fam163b	0.00445434	0.00164745	0	0	0	0	0
Dbh	0.00445434	0.00164745	0	0	0	0.00225225	0
Sardh	0.288419	0.265239	0.204013	0.230108	0.101307	0.173423	0.147222
Vav2	0.170379	0.112026	0.17893	0.176344	0.140523	0.380631	0.122222
Brd3os	0.0567929	0.062603	0.083612	0.0860215	0.0130719	0.0630631	0.0777778
Brd3	0.523385	0.444811	0.474916	0.544086	0.503268	0.513514	0.613889
Wdr5	0.179287	0.151565	0.160535	0.266667	0.166667	0.164414	0.125
Rxra	0.0478842	0.0510708	0.0602007	0.0602151	0.0784314	0.137387	0.075
Col5a1	3.13363	1.5486	1.45819	1.22151	4.01961	0.894144	7.78333
Olfm1	0.115813	0.194399	0.423077	0.133333	0.0980392	0.112613	0.144444
Ppp1r26	0.0077951	0.00329489	0.0083612	0.00645161	0	0.0045045	0
1700007K13Rik	0.0345212	0.00988468	0.0167224	0.0322581	0.0196078	0.0765766	0.0194444
Mrps2	0.152561	0.120264	0.155518	0.251613	0.0849673	0.175676	0.122222
Ralgds	0.151448	0.228995	0.19398	0.152688	0.104575	0.173423	0.225
Gtf3c5	0.0812918	0.0444811	0.0602007	0.131183	0.0555556	0.0810811	0.0555556
Tsc1	0.103563	0.102142	0.0936455	0.131183	0.0980392	0.0900901	0.105556
Spaca9	0.00445434	0.00164745	0.00501672	0.00645161	0	0.0045045	0.00833333
Ak8	0	0.00164745	0.00167224	0	0	0.00225225	0
Gtf3c4	0.120267	0.0856672	0.133779	0.167742	0.137255	0.126126	0.133333
Ddx31	0.0579065	0.0411862	0.041806	0.116129	0.0522876	0.0765766	0.0472222
Cfap77	0.00111359	0.014827	0.0150502	0.00430108	0	0.018018	0
Ttf1	0.190423	0.164745	0.190635	0.182796	0.163399	0.213964	0.144444
Setx	0.158129	0.116969	0.132107	0.193548	0.251634	0.18018	0.169444
Ntng2	0.00222717	0.00164745	0.00167224	0.00215054	0.00326797	0.00225225	0
Med27	0.2951	0.199341	0.225753	0.425806	0.163399	0.322072	0.269444
Rapgef1	0.106904	0.0790774	0.108696	0.215054	0.19281	0.144144	0.133333
Trub2	0.109131	0.0724876	0.083612	0.15914	0.0947712	0.0788288	0.0833333
Coq4	0.191537	0.191104	0.183946	0.27957	0.0816993	0.236486	0.161111
Slc27a4	0.17706	0.135091	0.202341	0.217204	0.111111	0.245495	0.144444
Urm1	0.415367	0.350906	0.399666	0.449462	0.235294	0.394144	0.327778
2600006K01Rik	0.0924276	0.0658979	0.0852843	0.0494624	0.0261438	0.0630631	0.116667
Cercam	0.451002	0.550247	0.605351	0.262366	0.140523	0.427928	0.652778
Odf2	0.165924	0.14168	0.204013	0.225806	0.186275	0.171171	0.227778
Gle1	0.481069	0.420099	0.436455	0.494624	0.359477	0.416667	0.441667
Sptan1	0.55902	0.627677	0.677258	0.490323	0.513072	0.731982	0.527778
Wdr34	0.168151	0.204283	0.145485	0.193548	0.0947712	0.18018	0.147222
Set	3.35189	2.63097	2.79431	5.48817	4.33007	2.72523	2.71944
Pkn3	0.0334076	0.0181219	0.0367893	0.0795699	0.0457516	0.0315315	0.0388889
Zdhhc12	0.651448	0.438221	0.665552	0.922581	0.330065	0.686937	0.466667
Zer1	0.0924276	0.0675453	0.0785953	0.0752688	0.0620915	0.0878378	0.0805556
Tbc1d13	0.0489978	0.0527183	0.0702341	0.0795699	0.0980392	0.0585586	0.0555556
Endog	0.577951	0.293245	0.279264	0.352688	0.25817	0.27027	0.569444
Spout1	0.342984	0.220758	0.229097	0.402151	0.156863	0.231982	0.344444
Kyat1	0.0567929	0.062603	0.0551839	0.0709677	0.0196078	0.0472973	0.0555556
1700084E18Rik	0.0122494	0.00494234	0.0167224	0.0129032	0.0163399	0.00675676	0.00555556
Lrrc8a	0.619154	0.602965	0.588629	0.498925	0.411765	0.572072	0.711111
Phyhd1	0.00890869	0.0181219	0.0117057	0.00860215	0.00653595	0.0045045	0.00277778
Dolk	0.290646	0.204283	0.234114	0.273118	0.120915	0.211712	0.205556
Nup188	0.155902	0.120264	0.155518	0.232258	0.101307	0.135135	0.161111
Sh3glb2	0.605791	0.565074	1.3612	1.09892	0.320261	1.70946	0.644444
Miga2	0.0657016	0.0444811	0.0685619	0.111828	0.0392157	0.0833333	0.075
Dolpp1	0.0868597	0.0543657	0.110368	0.129032	0.0686275	0.112613	0.113889
Crat	0.136971	0.143328	0.192308	0.148387	0.0882353	0.220721	0.155556
Ptpa	0.476615	0.406919	0.516722	0.662366	0.356209	0.603604	0.519444
Ier5l	0.171492	0.126853	0.133779	0.172043	0.107843	0.123874	0.15
Cstad	0.0478842	0.062603	0.0150502	0.0301075	0.00326797	0.0045045	0.0277778
9330198N18Rik	0.0100223	0.014827	0.0167224	0.00645161	0.00326797	0.0135135	0.00277778
1700001O22Rik	0.0077951	0.00658979	0.0167224	0.0129032	0	0.00675676	0.00833333
Ntmt1	1.01893	0.920923	0.924749	1.12903	0.611111	0.894144	0.95
Asb6	0.120267	0.0840198	0.132107	0.210753	0.0620915	0.164414	0.15
Prrx2	0.329621	0.400329	0.329431	0.195699	0.120915	0.0855856	0.916667
Ptges	0.241648	0.421746	0.349498	0.298925	0.183007	0.121622	0.402778
Tor1b	0.353007	0.291598	0.356187	0.35914	0.392157	0.317568	0.380556
Tor1a	0.777283	0.853377	0.740803	0.950538	0.526144	0.743243	0.827778
BC005624	0.809577	0.934102	0.861204	0.72043	0.575163	0.943694	0.913889
Usp20	0.0423163	0.0642504	0.0735786	0.0795699	0.0326797	0.112613	0.0638889
Fnbp1	0.0946548	0.102142	0.107023	0.107527	0.133987	0.0855856	0.116667
Gpr107	0.367483	0.270181	0.384615	0.305376	0.20915	0.29955	0.397222
Ncs1	0.158129	0.0658979	0.09699	0.221505	0.111111	0.0878378	0.227778
Hmcn2	0.0345212	0.0131796	0.0217391	0.0451613	0.00980392	0.027027	0.0222222
Ass1	0.445434	0.199341	0.240803	0.223656	0.143791	0.36036	0.202778
Fubp3	0.27951	0.187809	0.292642	0.266667	0.235294	0.286036	0.261111
Exosc2	0.216036	0.143328	0.153846	0.412903	0.271242	0.189189	0.188889
Abl1	0.222717	0.189456	0.212375	0.176344	0.22549	0.137387	0.275
Fibcd1	0	0.00164745	0.00334448	0	0	0	0
Lamc3	0.0167038	0.121911	0.113712	0.0172043	0.0196078	0.108108	0.00277778
Aif1l	0.064588	0.0345964	0.0819398	0.156989	0.0686275	0.101351	0.0444444
Nup214	0.241648	0.205931	0.234114	0.356989	0.176471	0.254505	0.186111
Fam78a	0	0	0	0.00430108	0	0	0.00277778
Plpp7	0.0623608	0.0906096	0.0819398	0.0623656	0.0228758	0.0247748	0.0638889
Prrc2b	0.344098	0.37397	0.352843	0.253763	0.415033	0.349099	0.369444
Gm13610	0.00445434	0	0.00334448	0.00215054	0	0.00900901	0.00555556
Pomt1	0.114699	0.107084	0.147157	0.202151	0.0620915	0.0923423	0.0972222
Uck1	0.259465	0.240527	0.32107	0.455914	0.117647	0.335586	0.247222
Swi5	9.40757	6.86985	7.78094	8.28817	8.80065	7.74775	9.96667
Golga2	0.231626	0.140033	0.204013	0.187097	0.333333	0.186937	0.333333
Dnm1	0.206013	0.140033	0.167224	0.16129	0.0718954	0.121622	0.252778
Ciz1	0.212695	0.200988	0.285953	0.2	0.111111	0.29955	0.177778
1110008P14Rik	0.699332	0.744646	0.964883	0.731183	0.633987	1.08108	0.713889
Lcn2	0.293987	1.63262	0.765886	0.227957	0.352941	1.12613	0.0388889
Ptges2	0.341871	0.278418	0.322742	0.445161	0.169935	0.427928	0.283333
Slc25a25	0.0946548	0.0873147	0.0769231	0.152688	0.0653595	0.209459	0.0694444
Naif1	0.0200445	0.0197694	0.0267559	0.0322581	0.0294118	0.0202703	0.00555556
Fam102a	0.0412027	0.0724876	0.0585284	0.0408602	0.0326797	0.0968468	0.0666667
Dpm2	0.687082	0.596376	0.787625	0.705376	0.405229	0.765766	0.75
Pip5kl1	0.00222717	0	0	0	0	0	0
St6galnac4	0.160356	0.107084	0.137124	0.124731	0.0620915	0.0743243	0.197222
St6galnac6	0.226058	0.252059	0.272575	0.232258	0.127451	0.222973	0.358333
Ak1	1.22606	0.861614	1	0.875269	0.696078	0.686937	1.14444
Eng	0.131403	0.0988468	0.11204	0.12043	0.0490196	0.137387	0.3
Fpgs	0.312918	0.196046	0.257525	0.301075	0.186275	0.259009	0.216667
Cdk9	0.576837	0.398682	0.468227	0.608602	0.529412	0.531532	0.505556
Sh2d3c	0.0846325	0.100494	0.122074	0.055914	0.0261438	0.0427928	0.0194444
Ttc16	0.00222717	0	0	0.00215054	0.00653595	0.00225225	0
Tor2a	0.638085	0.408567	0.618729	0.587097	0.205882	0.675676	0.780556
Ptrh1	0.243875	0.143328	0.170569	0.363441	0.147059	0.195946	0.202778
Cfap157	0	0.00164745	0	0	0	0	0
Stxbp1	0.146993	0.105437	0.148829	0.182796	0.189542	0.141892	0.191667
Gm13524	0.0167038	0.0131796	0.0083612	0.00430108	0.00326797	0.0045045	0.0194444
Gm13523	0.00222717	0.00164745	0.00167224	0	0	0.0045045	0.00277778
Fam129b	0.33853	0.242175	0.307692	0.337634	0.215686	0.367117	0.352778
Lrsam1	0.0244989	0.0345964	0.0535117	0.0451613	0.0294118	0.045045	0.0361111
Rpl12	9.47773	8.47941	7.53344	9.5828	10.8235	5.77252	8.05
Slc2a8	0.174833	0.136738	0.133779	0.111828	0.0522876	0.13964	0.161111
Garnl3	0.121381	0.174629	0.245819	0.133333	0.0392157	0.0968468	0.105556
Ralgps1	0.0311804	0.0181219	0.0401338	0.0645161	0.0228758	0.0698198	0.0194444
Gm13528	0.0345212	0.00988468	0.0100334	0.00645161	0.00653595	0.00900901	0
Angptl2	0.410913	0.268534	0.26087	0.182796	0.254902	0.207207	0.530556
Zbtb34	0.0412027	0.0428336	0.0267559	0.0430108	0.0392157	0.027027	0.0388889
Zbtb43	0.114699	0.115321	0.108696	0.0817204	0.0588235	0.132883	0.0777778
Mvb12b	0.0579065	0.0329489	0.0535117	0.0860215	0.0326797	0.0518018	0.0361111
C230014O12Rik	0.00556793	0	0	0.00860215	0	0.00900901	0
Pbx3	0.138085	0.0691928	0.0886288	0.212903	0.176471	0.11036	0.138889
Mapkap1	0.378619	0.283361	0.41806	0.468817	0.30719	0.493243	0.372222
Gapvd1	0.412027	0.336079	0.367893	0.393548	0.437908	0.398649	0.483333
Hspa5	12.1737	10.8303	12.2324	14.5398	9.27124	12.4617	11.5861
Rabepk	0.60245	0.485997	0.623746	0.563441	0.251634	0.583333	0.561111
Fbxw2	0.66147	0.771005	0.826087	0.612903	0.379085	0.862613	0.677778
Psmd5	0.761693	0.724876	0.747492	1.03011	0.45098	0.740991	0.655556
Cutal	0	0	0.00167224	0	0	0.00900901	0
Phf19	0.00445434	0.014827	0.0217391	0.0430108	0.0130719	0.0112613	0.00277778
Traf1	0.0178174	0.0378913	0.0685619	0.083871	0.0228758	0.0225225	0.0111111
Hc	0	0	0.00167224	0.00215054	0	0	0.00277778
AI182371	0	0	0	0	0	0.0045045	0
Cntrl	0.135857	0.108731	0.140468	0.210753	0.0915033	0.148649	0.133333
Rab14	2.28508	2.67875	2.80602	2.55054	2.05882	2.63964	2.29722
Gsn	4.63252	6.44316	6.64883	8.53118	5.97386	6.11712	6.41944
Stom	0.0623608	0.092257	0.0986622	0.0473118	0.0228758	0.484234	0.116667
Ggta1	0.141425	0.0840198	0.108696	0.131183	0.0882353	0.0743243	0.0777778
Dab2ip	0.19265	0.163097	0.207358	0.141935	0.205882	0.227477	0.213889
Ttll11	0.0144766	0.00164745	0.00501672	0.00860215	0.00326797	0	0.00277778
Ndufa8	3.48218	3.00659	3.49331	4.29032	3.94444	3.75225	3.04722
Morn5	0.0178174	0.0164745	0.0183946	0.0236559	0.00653595	0.0247748	0.0166667
Lhx6	0.0300668	0.00658979	0.0434783	0.124731	0.0620915	0.0653153	0.00277778
Rbm18	0.387528	0.301483	0.424749	0.443011	0.267974	0.421171	0.325
Mrrf	0.462138	0.411862	0.538462	0.572043	0.264706	0.490991	0.358333
Gm13431	0.105791	0.176277	0.33612	0.255914	0.143791	0.342342	0.0638889
Ptgs1	2.05345	1.53048	3.88294	4.67527	2.03268	4.56306	0.763889
Olfr338	0.00111359	0.00164745	0	0	0	0	0
Pdcl	0.272829	0.227348	0.284281	0.273118	0.205882	0.328829	0.202778
Rc3h2	0.247216	0.184514	0.237458	0.197849	0.235294	0.245495	0.305556
Zbtb6	0.0790646	0.0494234	0.0735786	0.103226	0.0751634	0.0698198	0.0694444
Zbtb26	0.0367483	0.0197694	0.0451505	0.0408602	0.0163399	0.0315315	0.0416667
Rabgap1	0.358575	0.339374	0.38796	0.249462	0.245098	0.337838	0.302778
Strbp	0.173719	0.200988	0.232441	0.247312	0.169935	0.27027	0.0888889
Gpr21	0.00111359	0.00494234	0	0	0.00326797	0.0045045	0.00277778
Crb2	0.101336	0.125206	0.234114	0.255914	0.20915	0.346847	0.00833333
Dennd1a	0.115813	0.110379	0.0953177	0.116129	0.0816993	0.0923423	0.119444
Lhx2	0	0.00164745	0	0.00430108	0	0	0.00277778
Nek6	0.749443	0.477759	0.473244	0.651613	0.300654	0.403153	0.488889
Psmb7	2.13363	1.62273	1.77592	3.0172	1.92484	1.91441	1.97778
Nr6a1	0.0278396	0.0263591	0.0468227	0.0408602	0.0588235	0.0563063	0.0111111
Olfml2a	0.0211581	0.0197694	0.0401338	0.0193548	0.0163399	0.0112613	0.0277778
Gm13496	0	0.00164745	0	0.00215054	0.00326797	0	0.00277778
Wdr38	0.00111359	0.00329489	0.00167224	0	0.00326797	0.0135135	0
Rpl35	33.7082	36.5124	28.6806	26.8344	38.0359	21.1374	29.1083
Arpc5l	1.20824	1.05931	1.33612	1.86667	1.29739	1.43919	1.125
Golga1	0.230512	0.184514	0.270903	0.249462	0.0980392	0.268018	0.166667
Scai	0.0979955	0.0741351	0.103679	0.0817204	0.0882353	0.0630631	0.111111
Ppp6c	0.584633	0.515651	0.615385	0.701075	0.428105	0.675676	0.575
Arhgap15	0.00111359	0.00329489	0	0.00645161	0.0130719	0.0045045	0.00555556
Gtdc1	0.0445434	0.0708402	0.0518395	0.0709677	0.0196078	0.0675676	0.0416667
Zeb2	0.706013	0.970346	0.535117	0.4	0.862745	0.254505	0.902778
Zeb2os	0.219376	0.191104	0.188963	0.152688	0.0849673	0.0945946	0.155556
Gm13465	0.00111359	0	0.00167224	0	0.00326797	0	0
Gm13470	0.077951	0.0280066	0.0468227	0.0688172	0.0686275	0.0202703	0.0888889
Acvr2a	0.0367483	0.0345964	0.0334448	0.0752688	0.0522876	0.0765766	0.0722222
Orc4	0.501114	0.411862	0.4699	0.617204	0.25817	0.54955	0.438889
Mbd5	0.091314	0.0873147	0.0852843	0.0645161	0.0915033	0.0630631	0.102778
Epc2	0.208241	0.159802	0.180602	0.172043	0.186275	0.186937	0.15
Kif5c	0.0122494	0.00988468	0.0150502	0.0258065	0.00653595	0.0788288	0.0166667
Lypd6b	0.00445434	0.00658979	0.0785953	0.0451613	0.00653595	0.0788288	0
Lypd6	0.00668151	0.00164745	0.00668896	0.00645161	0.00980392	0.00900901	0
Mmadhc	1.15702	0.840198	0.973244	1.32258	1.03595	1.13964	0.85
Gm13483	0.00222717	0.00658979	0.00167224	0.00430108	0.00326797	0.00675676	0
Gm48908	0	0.00164745	0	0.00215054	0	0	0
Rnd3	0.962138	0.509061	0.491639	0.595699	0.954248	0.43018	0.405556
Rbm43	0.271715	0.172982	0.270903	0.350538	0.199346	0.306306	0.175
Nmi	0.740535	0.757825	0.949833	0.989247	0.571895	0.894144	0.627778
Tnfaip6	2.24499	0.808896	0.667224	2.75054	2.72549	0.488739	1.54444
Rif1	0.232739	0.166392	0.19398	0.4	0.248366	0.335586	0.130556
Neb	0.0111359	0.00329489	0.00501672	0.00645161	0.00653595	0.0112613	0.0111111
Gm13522	0.0278396	0.00658979	0.00668896	0.0107527	0.00980392	0.00900901	0.0277778
Arl5a	0.375278	0.222405	0.312709	0.303226	0.421569	0.301802	0.302778
Cacnb4	0.00222717	0.0115321	0.00334448	0.00860215	0.00326797	0.00675676	0.00277778
Stam2	0.339644	0.29654	0.294314	0.333333	0.222222	0.290541	0.388889
Fmnl2	0.0690423	0.0543657	0.0635452	0.0602151	0.0751634	0.0382883	0.116667
Prpf40a	1.71381	1.57166	1.60702	2.1957	1.41503	1.6982	1.43889
Arl6ip6	0.459911	0.341021	0.43311	0.666667	0.352941	0.414414	0.408333
Rprm	0.0111359	0	0.00334448	0.00430108	0.00653595	0.00225225	0.00555556
Nr4a2	0.906459	1.27842	0.516722	0.32043	0.781046	0.531532	0.488889
Gpd2	0.319599	0.205931	0.379599	0.572043	0.281046	0.432432	0.180556
Galnt5	0.0256125	0.00823723	0.00167224	0.00645161	0.00980392	0.0045045	0.0333333
Cytip	0.0144766	0.00164745	0.00334448	0.00430108	0.00980392	0.00225225	0.00277778
Gm13546	0.00334076	0.00164745	0	0.00215054	0	0.00225225	0
Acvr1c	0.00445434	0	0.00167224	0.00645161	0.00326797	0	0
Acvr1	0.286192	0.169687	0.210702	0.230108	0.248366	0.247748	0.225
Upp2	0.150334	0.0691928	0.125418	0.124731	0.0751634	0.0945946	0.130556
Ccdc148	0.00334076	0	0.00334448	0.00215054	0	0.00900901	0.00555556
Pkp4	0.0701559	0.0510708	0.0568562	0.109677	0.0718954	0.0900901	0.0694444
Tanc1	0.211581	0.159802	0.190635	0.253763	0.281046	0.295045	0.236111
Wdsub1	0.182628	0.217463	0.309365	0.249462	0.0915033	0.387387	0.102778
Baz2b	0.416481	0.421746	0.324415	0.270968	0.339869	0.380631	0.35
Gm13620	0	0.00164745	0	0.00215054	0.00326797	0.00675676	0.00277778
March7	0.575724	0.490939	0.565217	0.496774	0.447712	0.556306	0.602778
Cd302	0.97216	1.59967	0.571906	0.470968	0.686275	0.59009	1.13611
Ly75	0.0434298	0.0131796	0.0401338	0.0602151	0.0392157	0.0720721	0.0166667
Gm13571	0	0	0	0	0	0	0
Pla2r1	0.064588	0.0461285	0.0518395	0.0623656	0.0326797	0.0495495	0.0472222
Itgb6	0	0	0	0	0	0	0
Rbms1	2.44432	3.34102	3.10368	3.2129	3.70261	3.61036	1.89167
Tank	0.228285	0.197694	0.182274	0.236559	0.147059	0.220721	0.177778
Psmd14	1.73051	1.55519	1.92642	2.74624	1.67974	1.79279	1.63056
Tbr1	0.00111359	0	0	0.00215054	0	0	0
Slc4a10	0	0	0	0.00215054	0	0	0
Dpp4	0.0512249	0.0939044	0.488294	0.208602	0.0882353	1.43694	0.0527778
Gm13565	0.0077951	0.00164745	0.00668896	0.0107527	0	0.0112613	0
Fap	0.123608	0.108731	0.0535117	0.0602151	0.0261438	0.0540541	0.241667
Ifih1	0.267261	0.410214	0.456522	0.215054	0.24183	0.488739	0.225
Gca	0.0612472	0.0576606	0.0869565	0.11828	0.0490196	0.171171	0.00555556
Kcnh7	0	0	0.00167224	0	0	0	0
Fign	0.0612472	0.0675453	0.0200669	0.0365591	0.0294118	0.0405405	0.0472222
Grb14	0.0679287	0.0560132	0.0668896	0.0709677	0.0326797	0.121622	0.0194444
Cobll1	0.112472	0.179572	0.347826	0.382796	0.199346	0.657658	0.0361111
Gm13594	0.00556793	0.00658979	0.0183946	0.00860215	0	0.027027	0.00555556
Scn2a	0.0289532	0.0247117	0.0167224	0.0301075	0.0163399	0.0225225	0.0472222
Ttc21b	0.109131	0.105437	0.133779	0.124731	0.114379	0.123874	0.0861111
Scn7a	0.0579065	0.164745	0.0919732	0.0623656	0.0784314	0.0833333	0.1
Xirp2	0.00668151	0	0.00501672	0.0172043	0	0.0045045	0
B3galt1	0.0222717	0.0214168	0.0317726	0.027957	0.0294118	0.0157658	0.0222222
Stk39	0.439866	0.609555	0.866221	0.625806	0.343137	0.630631	0.397222
Gm13596	0	0.00329489	0.0083612	0.00215054	0	0.0045045	0
Cers6	0.22049	0.202636	0.234114	0.176344	0.137255	0.191441	0.208333
Nostrin	0.0289532	0.0263591	0.0384615	0.0516129	0.0130719	0.0112613	0.0111111
Spc25	0.417595	0.654036	0.454849	1.73763	0.813725	0.47973	0.438889
Dhrs9	0.0311804	0.103789	0.118729	0.0666667	0.0294118	0.0878378	0.00833333
Lrp2	0.0178174	0.107084	0.195652	0.0537634	0.0718954	0.367117	0.00833333
Bbs5	0.178174	0.120264	0.123746	0.172043	0.0620915	0.164414	0.15
Klhl41	0.00222717	0.00164745	0.00334448	0.00215054	0	0.00225225	0.00833333
Fastkd1	0.0222717	0.0247117	0.0217391	0.0473118	0.0196078	0.0518018	0.0361111
Ppig	1.42094	1.49753	1.41472	1.81935	1.51307	1.42117	1.26667
Ccdc173	0.0412027	0.0378913	0.0652174	0.0430108	0.0196078	0.045045	0.0361111
Phospho2	0.253898	0.205931	0.244147	0.24086	0.0947712	0.283784	0.302778
Klhl23	0.0534521	0.0428336	0.0501672	0.0731183	0.0424837	0.0563063	0.0722222
Ssb	2.91203	2.66886	2.61037	3.69032	3.4085	2.46622	2.54722
Mettl5	0.358575	0.345964	0.396321	0.47957	0.271242	0.378378	0.338889
Mettl5os	0.0122494	0.0131796	0.00668896	0.0150538	0.00653595	0.0157658	0.0138889
Ubr3	0.178174	0.140033	0.177258	0.156989	0.166667	0.22973	0.194444
Sp5	0	0.00164745	0.0083612	0.00430108	0	0	0.00277778
Gad1os	0.00668151	0.00329489	0.00334448	0.0172043	0	0	0.00555556
Erich2os	0.00668151	0	0	0.0107527	0	0	0.00833333
Erich2	0.0211581	0.0164745	0.0234114	0.0150538	0.0130719	0.0202703	0.0111111
Gm26558	0.0100223	0.00494234	0.00334448	0.00215054	0	0.0135135	0.00555556
Gorasp2	1.89087	1.24382	1.38294	1.8172	1.61438	1.31982	1.88333
Tlk1	0.191537	0.151565	0.168896	0.255914	0.173203	0.308559	0.305556
Mettl8	0.108018	0.0873147	0.123746	0.180645	0.0686275	0.0743243	0.0861111
Dcaf17	0.256125	0.242175	0.33612	0.354839	0.166667	0.335586	0.225
Cybrd1	0.0211581	0.0345964	0.0735786	0.0365591	0.00980392	0.207207	0
Dync1i2	1.46659	2.07908	2.76756	1.43226	2.14706	4.32883	1.54167
Slc25a12	0.158129	0.113674	0.160535	0.174194	0.166667	0.155405	0.163889
Hat1	0.494432	0.497529	0.423077	1.2129	0.617647	0.572072	0.397222
Metap1d	0.167038	0.186161	0.170569	0.189247	0.0555556	0.153153	0.113889
Dlx2	0	0.00164745	0.00167224	0.00645161	0	0.0045045	0
Platr26	0	0	0	0.00645161	0.00326797	0.00225225	0
Itga6	0.135857	0.0691928	0.242475	0.475269	0.228758	0.831081	0.0111111
Pdk1	0.278396	0.092257	0.090301	0.221505	0.196078	0.105856	0.194444
Rapgef4	0.00334076	0.00164745	0	0.00430108	0.00326797	0	0.00555556
Map3k20	0.17706	0.112026	0.160535	0.223656	0.218954	0.144144	0.1
Cdca7	0.17706	0.112026	0.137124	0.455914	0.153595	0.135135	0.0777778
Sp3	0.522272	0.565074	0.722408	0.51828	0.686275	0.709459	0.497222
Sp3os	0.314031	0.410214	0.401338	0.234409	0.27451	0.463964	0.25
Ola1	0.72049	0.574959	0.801003	1.2	0.650327	0.736486	0.555556
Sp9	0.00111359	0	0	0.00215054	0	0	0
Cir1	0.638085	0.724876	0.640468	0.389247	0.496732	0.558559	0.591667
Scrn3	0.128062	0.0724876	0.125418	0.16129	0.0588235	0.137387	0.122222
Gpr155	0.0144766	0.0181219	0.0133779	0.0322581	0.0196078	0.0225225	0.00833333
Gm13703	0.00668151	0.00164745	0.00167224	0	0	0.00225225	0
Gm13709	0	0	0.00167224	0	0	0	0
Wipf1	0.116927	0.0906096	0.122074	0.148387	0.150327	0.130631	0.236111
Chrna1	0.00222717	0	0.00167224	0.00215054	0.00326797	0	0
Chrna1os	0.115813	0.128501	0.130435	0.105376	0.0816993	0.101351	0.2
Chn1os3	0.0122494	0.0164745	0.0150502	0.0107527	0	0.00675676	0.0111111
Chn1	0.0345212	0.0115321	0.0301003	0.0602151	0.0228758	0.0225225	0.0277778
Atf2	0.290646	0.30972	0.346154	0.260215	0.294118	0.376126	0.286111
Gm10822	0	0	0	0	0	0.00225225	0
Atp5g3	2.61136	2.25865	2.34615	3.15054	4.35621	2.6982	2.43056
Lnpk	0.211581	0.144975	0.148829	0.266667	0.166667	0.209459	0.202778
Hoxd9	0.00556793	0	0.00501672	0.00430108	0	0	0
Hoxd3os1	0.0244989	0.00823723	0.0351171	0.0451613	0.00980392	0.00225225	0.163889
Hoxd8	0.0211581	0.00658979	0.0150502	0.0150538	0.0130719	0.00225225	0.0805556
Mtx2	1.39755	1.18616	1.3495	1.47312	1.13072	1.38288	1.11389
2600014E21Rik	0.00556793	0.00329489	0.00167224	0.00215054	0.00980392	0	0.00277778
Hnrnpa3	4.49109	4.23229	4.28094	5.46452	5.52288	4.43468	3.36944
Nfe2l2	1.46771	1.9028	2.18896	1.55054	1.51634	2.60586	1.18333
Agps	0.232739	0.136738	0.197324	0.288172	0.27451	0.27027	0.291667
Ttc30b	0.167038	0.191104	0.165552	0.113978	0.0620915	0.227477	0.166667
Ttc30a2	0.00445434	0	0.00167224	0	0	0.00675676	0
Ttc30a1	0.0701559	0.0461285	0.0602007	0.0645161	0.0326797	0.0765766	0.0833333
Rbm45	0.0389755	0.0329489	0.0401338	0.0494624	0.0490196	0.0337838	0.0444444
Osbpl6	0.0155902	0.0181219	0.0100334	0.027957	0	0.00900901	0.0472222
Prkra	0.566815	0.482702	0.496656	0.417204	0.27451	0.490991	0.458333
Pjvk	0	0	0	0	0.00326797	0	0
Fkbp7	3.55679	2.99506	2.25418	1.21935	2.68301	2.19369	5.05556
Plekha3	0.171492	0.102142	0.145485	0.253763	0.205882	0.182432	0.180556
Ttn	0.00334076	0.00329489	0.00167224	0	0	0.0045045	0.00277778
Ccdc141	0.0991091	0.136738	0.364548	0.258065	0.120915	0.22973	0.102778
Sestd1	0.224944	0.191104	0.334448	0.309677	0.238562	0.31982	0.163889
Zfp385b	0.0122494	0.00823723	0	0.0129032	0.0130719	0.00900901	0.0277778
Cwc22	0.157016	0.14168	0.123746	0.219355	0.186275	0.164414	0.133333
Ube2e3	1.76726	2.0626	1.87625	1.75914	1.21569	1.92793	1.23333
Itga4	0.00445434	0	0	0	0.00326797	0.00225225	0
Cerkl	0.00890869	0.00329489	0.00167224	0.0129032	0.00326797	0.0045045	0
Ssfa2	0.114699	0.115321	0.100334	0.12043	0.140523	0.247748	0.075
Pde1a	0.376392	0.24547	0.117057	0.107527	0.137255	0.135135	0.461111
Prdx6b	0.00222717	0	0.00167224	0	0.00326797	0	0
Dnajc10	0.819599	0.726524	0.991639	0.924731	0.96732	1.01351	0.902778
Frzb	0.0556793	0.0543657	0.0401338	0.0774194	0.0326797	0.0472973	0.0944444
Nckap1	0.570156	0.574959	0.847826	0.830108	0.849673	1.13964	0.661111
Dusp19	0.492205	0.418451	0.466555	0.443011	0.316993	0.472973	0.425
Nup35	0.241648	0.184514	0.202341	0.67957	0.326797	0.22973	0.216667
Zfp804a	0.00111359	0	0	0.00215054	0	0	0
Zc3h15	1.68931	1.21911	1.25251	1.78495	1.95425	1.36036	1.66389
Itgav	0.759465	0.649094	0.812709	0.750538	1.13399	1.09685	0.786111
Fam171b	0.193764	0.108731	0.0886288	0.0946237	0.104575	0.0540541	0.6
Calcrl	0.018931	0.014827	0.0301003	0.0537634	0.0326797	0.018018	0.0194444
Tfpi	0.958797	0.639209	0.491639	0.443011	0.424837	0.948198	1.08889
Ctnnd1	0.348552	0.283361	0.384615	0.324731	0.408497	0.418919	0.505556
Selenoh	2.82628	2.00165	2.12375	4.38495	3.49346	1.91892	2.66111
Tmx2	0.353007	0.298188	0.438127	0.63871	0.25817	0.493243	0.388889
Med19	0.423163	0.342669	0.461538	0.64086	0.294118	0.605856	0.4
Zdhhc5	0.13029	0.118616	0.140468	0.189247	0.235294	0.171171	0.15
Clp1	0.13363	0.118616	0.135452	0.180645	0.0751634	0.189189	0.105556
Ypel4	0.0256125	0.0428336	0.0317726	0.0172043	0.00653595	0.0292793	0.05
Gm19426	0.0467706	0.0675453	0.0451505	0.0666667	0.0555556	0.0698198	0.0388889
Serping1	5.74944	13.5206	9.70903	2.53118	3.82026	11.8266	6.84444
Ube2l6	1.10802	1.31796	1.88629	1.07742	0.686275	2.33784	1.00278
Timm10	0.452116	0.401977	0.38796	0.815054	0.48366	0.545045	0.330556
Slc43a1	0.151448	0.0708402	0.0551839	0.0709677	0.0326797	0.135135	0.125
Slc43a3	0.837416	1.49423	1.32609	0.898925	0.843137	2.24099	0.830556
Prg2	0.0111359	0.00164745	0.00167224	0.00645161	0	0.0135135	0.00833333
P2rx3	0	0.00164745	0	0.00430108	0	0	0
Ssrp1	1.25612	1.15486	1.06689	2.05806	1.35621	1.18243	1.08333
Tnks1bp1	0.406459	0.369028	0.513378	0.43871	0.428105	0.608108	0.4
Aplnr	0	0.00164745	0	0.00215054	0	0.0045045	0.00277778
Gm13713	0.0077951	0.00494234	0.0217391	0.0107527	0.00653595	0.00675676	0.00555556
Lrrc55	0	0	0	0	0	0	0
Gm13715	0.00222717	0	0	0.00215054	0	0.00225225	0
Olfr1033	0.155902	0.0939044	0.0819398	0.109677	0.104575	0.0968468	0.255556
Olfr1034	0.013363	0.00658979	0.00501672	0.0129032	0.00980392	0.0045045	0.0305556
Olfr1124	0	0	0	0.00215054	0	0.00225225	0
Olfr1160	0.00222717	0	0	0.00215054	0	0.0045045	0
Olfr1238	0.00222717	0	0	0.00430108	0	0	0
Olfr1260	0.00111359	0.00329489	0.00167224	0	0	0	0
Ptprj	0.0868597	0.0477759	0.0802676	0.0946237	0.114379	0.148649	0.111111
Nup160	0.105791	0.0955519	0.0719064	0.182796	0.0882353	0.0833333	0.0527778
Fnbp4	0.169265	0.181219	0.195652	0.227957	0.212418	0.216216	0.180556
Agbl2	0.013363	0.014827	0.0200669	0.0150538	0.0130719	0.0112613	0.0166667
Mtch2	1.76503	1.86491	2.16388	2.29032	1.49346	1.92793	1.86111
C1qtnf4	0.104677	0.0873147	0.107023	0.0623656	0.0392157	0.157658	0.0666667
Ndufs3	2.16592	2.08072	2.12876	2.20645	1.96078	2.03829	1.95556
Kbtbd4	0.211581	0.136738	0.173913	0.268817	0.0882353	0.20045	0.158333
Celf1	0.498886	0.364086	0.458194	0.582796	0.816993	0.529279	0.544444
Rapsn	0.0144766	0.0131796	0.0083612	0.00215054	0	0.0045045	0.00277778
Psmc3	2.37528	2.21582	2.49164	2.84516	2.19281	2.45045	2.53889
Slc39a13	0.491091	0.311367	0.316054	0.273118	0.222222	0.292793	0.544444
Spi1	0.00111359	0.00329489	0	0	0	0.00225225	0.00277778
Mybpc3	0.0077951	0.0263591	0.0150502	0.00430108	0	0.0135135	0.0111111
Madd	0.0267261	0.0230643	0.0401338	0.0451613	0.0424837	0.0630631	0.00555556
Nr1h3	0.0534521	0.121911	0.148829	0.0645161	0.0228758	0.0563063	0.0444444
Acp2	0.170379	0.191104	0.187291	0.172043	0.120915	0.204955	0.202778
Ddb2	0.0545657	0.0477759	0.0501672	0.055914	0.0261438	0.0585586	0.05
A330069E16Rik	0.0334076	0.0411862	0.0167224	0.0580645	0.0588235	0.0427928	0.0611111
Pacsin3	0.120267	0.0807249	0.11204	0.124731	0.0620915	0.146396	0.127778
Arfgap2	0.414254	0.364086	0.481605	0.464516	0.169935	0.454955	0.319444
1110051M20Rik	0.305122	0.23229	0.346154	0.264516	0.160131	0.315315	0.347222
Lrp4	0.0256125	0.0642504	0.0635452	0.0301075	0.0163399	0.027027	0.0694444
Ckap5	0.270601	0.187809	0.247492	0.4	0.372549	0.29955	0.308333
F2	0.00222717	0.00164745	0.00167224	0.00215054	0	0.00675676	0.00277778
Zfp408	0.0289532	0.029654	0.0183946	0.0344086	0.0228758	0.0225225	0.0416667
Arhgap1	1.0735	0.714992	0.849498	1.0129	0.702614	0.831081	1.05278
Atg13	0.213808	0.143328	0.19398	0.182796	0.0751634	0.243243	0.186111
Harbi1	0.171492	0.133443	0.137124	0.129032	0.0816993	0.112613	0.105556
Ambra1	0.0757238	0.062603	0.0735786	0.0946237	0.0849673	0.0765766	0.0694444
Mdk	5.24276	4.95717	2.97659	1.86667	2.48366	1.40315	3.71111
Dgkz	0.129176	0.0840198	0.165552	0.210753	0.0784314	0.274775	0.0944444
Creb3l1	3.1314	1.62438	2.00669	2.0172	1.92484	2.12613	3.125
2900072N19Rik	0.00111359	0	0	0	0.00326797	0	0
Phf21a	0.341871	0.326194	0.287625	0.174194	0.359477	0.234234	0.322222
Large2	0.013363	0.0115321	0.0200669	0.00430108	0	0.0585586	0.0111111
Pex16	0.275056	0.313015	0.366221	0.344086	0.189542	0.369369	0.263889
1700029I15Rik	0.00556793	0.00658979	0.00167224	0	0	0.0045045	0.00277778
Mapk8ip1	0.142539	0.179572	0.272575	0.169892	0.0980392	0.272523	0.127778
Cry2	0.05902	0.0593081	0.0719064	0.0537634	0.0522876	0.0968468	0.0916667
Slc35c1	0.0868597	0.0691928	0.11204	0.163441	0.0915033	0.279279	0.0611111
Chst1	0.296214	0.0691928	0.262542	0.539785	0.245098	0.290541	0.163889
Gm13816	0	0.00329489	0	0	0.00326797	0	0
Syt13	0.013363	0.00658979	0.0167224	0.027957	0	0.00675676	0
Prdm11	0.0256125	0.0230643	0.0200669	0.0387097	0.0130719	0.0292793	0.0166667
Trp53i11	0.0356347	0.103789	0.120401	0.0537634	0.0196078	0.168919	0.0444444
Tspan18	0.0712695	0.00494234	0.0317726	0.0602151	0.0392157	0.0247748	0.5
Cd82	0.525612	0.576606	1.42642	1.0129	0.251634	2.22297	0.280556
Alx4	0	0.00164745	0.00167224	0	0	0	0.0166667
Ext2	0.828508	0.771005	0.919732	0.636559	0.405229	0.86036	0.905556
Accs	0.0924276	0.0906096	0.0936455	0.101075	0.0392157	0.123874	0.0805556
Gm13889	0.0111359	0.00164745	0.00501672	0.0215054	0.00326797	0.00900901	0.0194444
Alkbh3	0.418708	0.377265	0.464883	0.447312	0.196078	0.457207	0.358333
Hsd17b12	1.08797	0.733114	0.817726	1.43441	0.656863	0.984234	0.9
Mir670hg	0	0	0	0	0	0.00225225	0.00277778
Ttc17	0.128062	0.0708402	0.0869565	0.0924731	0.0620915	0.0675676	0.0916667
Api5	0.487751	0.398682	0.448161	0.546237	0.558824	0.443694	0.486111
Lrrc4c	0.0634744	0.0411862	0.0384615	0.027957	0.0228758	0.00675676	0.0138889
B230118H07Rik	0.417595	0.509061	0.498328	0.391398	0.313725	0.421171	0.375
Traf6	0.0434298	0.0280066	0.048495	0.0645161	0.0882353	0.0720721	0.0277778
Prr5l	0.0178174	0.0181219	0.0133779	0.0172043	0.00326797	0.0225225	0.0444444
Commd9	0.776169	0.530478	0.643813	0.778495	0.316993	0.682432	0.847222
Ldlrad3	0.135857	0.121911	0.0919732	0.146237	0.0718954	0.0563063	0.0916667
Trim44	0.321826	0.230643	0.280936	0.31828	0.310458	0.245495	0.294444
Fjx1	0.0434298	0.0362438	0.0167224	0.027957	0.00653595	0.0135135	0.0277778
Pamr1	0.110245	0.0708402	0.133779	0.0967742	0.0816993	0.168919	0.486111
Slc1a2	0.0211581	0.0131796	0.0284281	0.0387097	0.0196078	0.0337838	0
Cd44	1.7706	0.873147	1.13545	3.0172	5.98039	1.81306	2.31389
Pdhx	0.210468	0.144975	0.198997	0.268817	0.133987	0.225225	0.188889
Apip	0.616927	0.584843	0.535117	0.696774	0.53268	0.691441	0.505556
Ehf	0.00668151	0.00658979	0.00501672	0.0129032	0.00980392	0.00225225	0.00555556
A930006I01Rik	0.00222717	0	0	0.00860215	0.00326797	0	0.00277778
Cat	0.448775	0.477759	0.61204	0.460215	0.326797	0.554054	0.430556
Abtb2	0.0434298	0.0115321	0.0234114	0.055914	0.0359477	0.0405405	0.111111
Nat10	0.139198	0.0708402	0.083612	0.197849	0.0555556	0.101351	0.0916667
Caprin1	0.920935	0.711697	0.923077	0.797849	1.03595	0.961712	0.983333
Lmo2	0.0200445	0.0181219	0.0150502	0.0494624	0.0130719	0.036036	0.136111
Fbxo3	0.406459	0.428336	0.463211	0.337634	0.264706	0.506757	0.380556
Cd59b	0.10245	0.092257	0.103679	0.0451613	0.0228758	0.0923423	0.0694444
Cd59a	0.203786	0.149918	0.148829	0.103226	0.0620915	0.157658	0.0805556
A930018P22Rik	0.00222717	0.00494234	0.00334448	0.00430108	0	0	0
D430041D05Rik	0.00111359	0	0	0	0	0	0
Hipk3	0.232739	0.186161	0.205686	0.202151	0.343137	0.324324	0.222222
Cstf3	0.327394	0.176277	0.22408	0.341935	0.297386	0.252252	0.341667
Tcp11l1	0.119154	0.0691928	0.0869565	0.139785	0.127451	0.155405	0.122222
Depdc7	0.032294	0.0263591	0.0117057	0.0408602	0.0130719	0.036036	0.0166667
Qser1	0.175947	0.177924	0.198997	0.208602	0.20915	0.202703	0.216667
Prrg4	0.0122494	0.00823723	0.00668896	0.0301075	0	0.036036	0.00555556
Ccdc73	0.0445434	0.0411862	0.0384615	0.0322581	0.0294118	0.045045	0.0472222
Eif3m	2.48218	2.58484	2.4097	3.11183	2.66013	2.5518	1.975
Wt1os	0.199332	0.16804	0.282609	0.350538	0.183007	0.29955	0.0888889
Wt1	2.98441	3.22076	3.48829	3.57634	4.24837	3.95946	1.68889
Them7	0.0545657	0.0197694	0.0284281	0.0301075	0.0163399	0.0495495	0.0722222
Rcn1	4.83408	3.13674	2.82609	2.35699	2.68954	1.9527	5.74167
Elp4	0.278396	0.237232	0.265886	0.298925	0.114379	0.191441	0.2
Immp1l	1.14031	1.05437	1.19398	1.04086	1.18627	1.11712	1.13333
Dnajc24	0.448775	0.355848	0.424749	0.503226	0.316993	0.407658	0.413889
Mpped2	0.0244989	0.0345964	0.0551839	0.055914	0.00653595	0.0472973	0.00833333
Arl14ep	0.211581	0.210873	0.16388	0.172043	0.107843	0.157658	0.186111
Kcna4	0.00111359	0	0	0.00215054	0	0.00675676	0
Mettl15	0.105791	0.07743	0.0735786	0.12043	0.0424837	0.0855856	0.0583333
Kif18a	0.0512249	0.100494	0.0602007	0.206452	0.0490196	0.0608108	0.05
Bdnf	0.064588	0.0197694	0.0100334	0.0365591	0.0294118	0.045045	0.0138889
Lin7c	0.348552	0.270181	0.359532	0.419355	0.248366	0.445946	0.413889
Lgr4	0.0534521	0.029654	0.0652174	0.137634	0.0718954	0.0337838	0.277778
Ccdc34	0.729399	0.739703	0.943144	1.76344	1.69608	0.864865	1.25278
Bbox1	0	0	0	0	0	0.0045045	0
Fibin	0.451002	0.205931	0.120401	0.137634	0.166667	0.243243	0.211111
Ano3	0.013363	0.00329489	0.0083612	0.00430108	0.00653595	0.0135135	0.0222222
Lpcat4	0.115813	0.0790774	0.20903	0.307527	0.0490196	0.382883	0.0555556
Nop10	3.39087	3.44481	3.1388	4.31613	4.45098	3.43243	3.36944
Slc12a6	0.0902004	0.0757825	0.0852843	0.0924731	0.0882353	0.11036	0.0916667
Emc4	1.12918	1.09885	1.13211	1.55484	0.849673	1.31532	1.02778
Katnbl1	0.266147	0.204283	0.29097	0.344086	0.150327	0.310811	0.261111
Emc7	1.91982	2.08567	1.97157	2.1957	2.00654	2.26802	1.90556
Aven	0.091314	0.0378913	0.0702341	0.154839	0.0620915	0.0833333	0.0694444
Fmn1	0.123608	0.0741351	0.0919732	0.139785	0.0816993	0.11036	0.05
Scg5	0.00111359	0	0	0.00430108	0	0.00225225	0
Arhgap11a	0.100223	0.0889621	0.09699	0.31828	0.277778	0.0923423	0.0888889
Actc1	0.108018	0.0560132	0.110368	0.103226	0.0228758	0.175676	0.111111
C130080G10Rik	0.00445434	0.00164745	0.00501672	0.00215054	0	0.00225225	0.00277778
Aqr	0.234967	0.194399	0.222408	0.275269	0.25817	0.198198	0.194444
Zfp770	0.104677	0.0527183	0.0551839	0.131183	0.101307	0.0810811	0.0805556
Dph6	0.200445	0.196046	0.200669	0.264516	0.218954	0.20045	0.161111
BC052040	0.0545657	0.0642504	0.107023	0.0817204	0.0522876	0.0810811	0.0388889
Meis2	1.22494	1.53542	1.61371	1.2	1.10131	1.87838	1.13611
2700033N17Rik	0.0946548	0.0609555	0.0936455	0.0946237	0.0555556	0.112613	0.0777778
G630016G05Rik	0.00890869	0.0131796	0.00668896	0.00860215	0	0.0045045	0.0138889
D330050G23Rik	0.0267261	0.0164745	0.0083612	0.0322581	0.00326797	0.0157658	0.0444444
Gm29340	0.0278396	0.00164745	0.0183946	0.0322581	0.00326797	0.0225225	0.0138889
Spred1	0.420935	0.357496	0.331104	0.393548	0.470588	0.292793	0.391667
Fam98b	0.290646	0.172982	0.207358	0.283871	0.385621	0.292793	0.252778
Thbs1	2.89421	1.99506	0.698997	0.769892	3.31373	0.984234	0.988889
Fsip1	0.0077951	0	0.00167224	0.0193548	0.00326797	0.00675676	0.00555556
Gpr176	0.2049	0.07743	0.0652174	0.150538	0.143791	0.0247748	0.141667
Eif2ak4	0.0757238	0.0691928	0.0585284	0.0817204	0.0751634	0.0698198	0.0888889
Srp14	2.82294	3.05272	2.91472	2.70108	3.2549	3.23649	3.02778
Bmf	0.0412027	0.07743	0.0585284	0.0129032	0.0228758	0.0518018	0.0333333
Bub1b	0.16147	0.128501	0.173913	0.391398	0.212418	0.128378	0.161111
Pak6	0.0144766	0.0263591	0.0284281	0.0150538	0.00980392	0.0247748	0
Inafm2	0.0434298	0.0444811	0.0267559	0.0451613	0.0588235	0.0472973	0.0555556
A430105I19Rik	0.128062	0.110379	0.107023	0.144086	0.0686275	0.0698198	0.0777778
Disp2	0.00222717	0.00494234	0.00334448	0	0.00326797	0	0.00277778
Knstrn	0.296214	0.265239	0.339465	0.817204	0.303922	0.362613	0.347222
Ivd	0.125835	0.123558	0.090301	0.15914	0.0490196	0.0810811	0.111111
Bahd1	0.0579065	0.0263591	0.0451505	0.0645161	0.101307	0.0518018	0.0611111
Chst14	0.223831	0.156507	0.153846	0.16129	0.0588235	0.0900901	0.208333
Ccdc32	0.262806	0.202636	0.26087	0.296774	0.160131	0.279279	0.369444
Rpusd2	0.0111359	0.00329489	0.00668896	0.0215054	0.0130719	0.00900901	0
Knl1	0.103563	0.15486	0.118729	0.462366	0.166667	0.148649	0.0916667
Rad51	0.144766	0.16145	0.125418	0.716129	0.205882	0.213964	0.138889
Rmdn3	0.33853	0.207578	0.265886	0.391398	0.153595	0.382883	0.233333
Gchfr	0.0824053	0.0345964	0.0585284	0.083871	0.0392157	0.045045	0.0388889
Dnajc17	0.165924	0.113674	0.183946	0.178495	0.0718954	0.186937	0.138889
Zfyve19	0.216036	0.21911	0.217391	0.221505	0.0751634	0.225225	0.205556
Spint1	0.0256125	0.0263591	0.0351171	0.0688172	0.0228758	0.0743243	0.0138889
Vps18	0.0946548	0.07743	0.113712	0.0989247	0.0359477	0.112613	0.0861111
Chac1	0.0233853	0.0263591	0.0735786	0.0602151	0.0163399	0.157658	0.0166667
Ino80	0.138085	0.121911	0.155518	0.169892	0.120915	0.130631	0.15
Exd1	0.00334076	0.00164745	0.0117057	0.00430108	0.00326797	0.00225225	0.0111111
Chp1	0.476615	0.434926	0.712375	0.602151	0.640523	0.804054	0.530556
1700020I14Rik	0.727171	0.599671	0.82107	0.832258	0.830065	0.900901	1.12222
Oip5	0.0657016	0.0724876	0.083612	0.305376	0.0784314	0.103604	0.0777778
Nusap1	0.207127	0.568369	0.411371	1.48387	0.683007	0.407658	0.283333
Ndufaf1	0.385301	0.390445	0.392977	0.425806	0.196078	0.34009	0.386111
Rtf1	1.08686	1.10379	1.04013	1.0043	1.30065	1.08333	0.994444
Itpka	0.00445434	0.00988468	0.0100334	0.0129032	0.00326797	0.00900901	0.00555556
Rpap1	0.0935412	0.0807249	0.0702341	0.109677	0.0751634	0.0810811	0.0888889
Tyro3	0.169265	0.0527183	0.0568562	0.169892	0.0686275	0.0337838	0.144444
Mga	0.399777	0.324547	0.37291	0.324731	0.513072	0.324324	0.380556
Mapkbp1	0.0634744	0.0543657	0.0735786	0.0537634	0.0686275	0.0292793	0.0611111
Jmjd7	0.0657016	0.062603	0.0702341	0.107527	0.0359477	0.0630631	0.0861111
Ehd4	0.26392	0.176277	0.324415	0.427957	0.215686	0.556306	0.313889
Vps39	0.05902	0.0461285	0.0518395	0.0731183	0.0522876	0.0608108	0.0583333
Tmem87a	0.0668151	0.0609555	0.0769231	0.0709677	0.0751634	0.0563063	0.0444444
Ganc	0.0757238	0.100494	0.0869565	0.0731183	0.0457516	0.119369	0.0805556
Capn3	0.00111359	0.00329489	0.00334448	0	0	0.00225225	0
Zfp106	0.477728	0.400329	0.510033	0.6	0.663399	0.472973	0.497222
Gm26899	0	0	0	0	0	0	0.00277778
Snap23	0.860802	0.808896	1.0602	0.789247	0.539216	0.907658	1.22222
Lrrc57	0.11804	0.107084	0.12709	0.212903	0.0882353	0.15991	0.15
Haus2	0.153675	0.0971993	0.120401	0.176344	0.0882353	0.193694	0.130556
Stard9	0.0278396	0.0494234	0.0351171	0.0473118	0.0163399	0.0337838	0.0666667
Cdan1	0.0512249	0.0247117	0.0635452	0.0537634	0.0457516	0.0472973	0.0638889
Ttbk2	0.0623608	0.0428336	0.0434783	0.0666667	0.0424837	0.0518018	0.0722222
Ubr1	0.203786	0.164745	0.219064	0.141935	0.163399	0.240991	0.208333
Tmem62	0.0924276	0.0741351	0.244147	0.195699	0.0751634	0.317568	0.0611111
Ccndbp1	0.564588	0.53542	0.653846	0.449462	0.359477	0.623874	0.519444
Tgm5	0.00556793	0.00164745	0.0334448	0.0215054	0.00326797	0.00225225	0.0194444
Lcmt2	0.175947	0.120264	0.158863	0.204301	0.0457516	0.20045	0.108333
Adal	0.0935412	0.062603	0.0618729	0.12043	0.0261438	0.0698198	0.0805556
Zscan29	0.103563	0.113674	0.120401	0.113978	0.0392157	0.135135	0.0583333
Tubgcp4	0.217149	0.214168	0.222408	0.298925	0.0882353	0.195946	0.230556
Trp53bp1	0.183742	0.130148	0.133779	0.137634	0.19281	0.193694	0.186111
Map1a	0.25167	0.200988	0.299331	0.217204	0.143791	0.175676	0.291667
Ppip5k1	0.0501114	0.0280066	0.0769231	0.0924731	0.0490196	0.168919	0.0472222
Ckmt1	0.00890869	0.0164745	0.416388	0.0258065	0.0196078	1.43694	0
Catsper2	0.0211581	0.014827	0.0267559	0.0258065	0.00980392	0.0225225	0.00833333
Pdia3	11.1893	10.5947	11.6622	9.57849	8.1732	11.2432	10.4722
Serinc4	0.00222717	0	0	0	0.00326797	0	0
Serf2	26.4566	22.2158	21.888	16.486	23.5	16.964	36.5778
Hypk	2.71047	2.24876	2.52843	3.02151	3.78758	2.47072	2.95556
Mfap1b	0.331849	0.306425	0.337793	0.288172	0.176471	0.313063	0.263889
Mfap1a	0.26392	0.263591	0.295987	0.273118	0.189542	0.369369	0.205556
Wdr76	0.064588	0.0955519	0.102007	0.206452	0.0947712	0.108108	0.0583333
Frmd5	0.00668151	0.0263591	0.0284281	0.00645161	0.00653595	0.018018	0
Casc4	0.302895	0.235585	0.230769	0.230108	0.20915	0.277027	0.180556
Ctdspl2	0.300668	0.286656	0.292642	0.329032	0.235294	0.265766	0.225
Eif3j1	1.02673	0.76771	0.719064	1.21935	1.34314	0.801802	0.980556
Spg11	0.0835189	0.0658979	0.122074	0.113978	0.0620915	0.0765766	0.0722222
B2m	11.7884	30.8616	29.0435	10.0344	10.634	39.8964	14.1528
Trim69	0.00222717	0.00164745	0.00167224	0	0	0.00225225	0.00277778
Sord	0.124722	0.16804	0.120401	0.0473118	0.0294118	0.0855856	0.1
Duoxa1	0.00668151	0.00329489	0.00167224	0.0150538	0	0.0135135	0.0166667
Duox1	0.00556793	0.00164745	0.00167224	0.00430108	0	0.0045045	0.00555556
Shf	0.0434298	0.0263591	0.0250836	0.0451613	0.0196078	0.018018	0.0638889
Gatm	2.62027	5.27183	2.12375	2.98925	1.36601	0.641892	0.219444
AA467197	0.109131	0.0461285	0.0401338	0.101075	0.0980392	0.0518018	0.180556
Slc30a4	0.128062	0.0609555	0.118729	0.0946237	0.183007	0.117117	0.133333
Bloc1s6os	0.0167038	0.0115321	0.0083612	0.0129032	0.00653595	0.0112613	0.0138889
Bloc1s6	0.224944	0.192751	0.250836	0.217204	0.147059	0.25	0.194444
Sqor	0.187082	0.482702	0.51505	0.169892	0.0784314	0.439189	0.194444
Sema6d	0.0924276	0.144975	0.125418	0.0989247	0.111111	0.101351	0.122222
Slc24a5	0.423163	0.377265	0.322742	0.741935	0.251634	0.346847	0.380556
Myef2	0.469933	0.395387	0.376254	0.894624	0.669935	0.394144	0.402778
Slc12a1	0	0.00164745	0	0	0	0	0.0111111
Gm14002	0.0155902	0.00494234	0.00167224	0.00215054	0	0	0.0222222
Dut	1.21381	1.05107	1.18896	2.93118	1.98693	1.26577	1.20556
A530010F05Rik	0.00111359	0	0	0	0	0	0.00555556
Fbn1	2.22383	1.9687	2.2408	1.80215	2.64706	1.13514	4.88889
Gm9913	0.0478842	0.00988468	0.0150502	0.0150538	0.00326797	0.0135135	0.0388889
Cep152	0.0200445	0.0263591	0.0317726	0.0473118	0.0392157	0.0157658	0.0333333
Shc4	0.0100223	0.00988468	0.0083612	0.00645161	0.0163399	0.00225225	0.00555556
Eid1	0.634744	0.489292	0.528428	0.391398	0.702614	0.488739	0.897222
Secisbp2l	0.227171	0.16804	0.229097	0.189247	0.179739	0.313063	0.186111
Cops2	1.0412	1.00659	0.991639	1.08387	0.787582	0.790541	0.938889
Galk2	0.504454	0.481054	0.453177	0.352688	0.300654	0.511261	0.383333
Fam227b	0.00222717	0	0	0	0	0	0
Fgf7	0.0489978	0.0247117	0.0083612	0.0537634	0.0261438	0.0292793	0.325
Dtwd1	0.348552	0.345964	0.264214	0.298925	0.166667	0.216216	0.313889
Atp8b4	0	0	0	0.00215054	0.00326797	0	0
Hdc	0.159243	1.42504	0.618729	0.4	0.130719	0.822072	0.163889
Gabpb1	0.266147	0.184514	0.200669	0.335484	0.173203	0.227477	0.219444
Gm27003	0.0300668	0.00494234	0.0250836	0.0193548	0.00980392	0.0292793	0.0277778
Usp8	0.445434	0.456343	0.479933	0.372043	0.372549	0.538288	0.413889
Usp50	1.48552	0.853377	1.02843	1.93763	2.9902	1.66892	1.14167
Trpm7	0.360802	0.382208	0.481605	0.309677	0.343137	0.511261	0.313889
Sppl2a	0.332962	0.37397	0.520067	0.225806	0.366013	0.533784	0.355556
Ap4e1	0.10245	0.0840198	0.165552	0.133333	0.107843	0.236486	0.075
Blvra	0.619154	0.596376	0.849498	0.92043	0.401961	0.75	0.525
Ncaph	0.0846325	0.0840198	0.0936455	0.290323	0.160131	0.0968468	0.0805556
Itpripl1	0.13029	0.110379	0.202341	0.245161	0.137255	0.259009	0.0555556
1810024B03Rik	0.13029	0.107084	0.103679	0.12043	0.101307	0.0878378	0.133333
Snrnp200	0.291759	0.21911	0.237458	0.266667	0.457516	0.292793	0.266667
Ciao1	0.36637	0.375618	0.382943	0.417204	0.228758	0.355856	0.363889
Tmem127	0.206013	0.247117	0.242475	0.169892	0.150327	0.256757	0.219444
Stard7	0.23608	0.182867	0.220736	0.335484	0.24183	0.216216	0.261111
Dusp2	0.0100223	0.00658979	0.00501672	0.00430108	0.00326797	0.00225225	0.00555556
Adra2b	0.00222717	0	0	0	0	0.00225225	0
Gpat2	0.00111359	0	0.00501672	0.00215054	0	0.00675676	0
Fahd2a	0.11804	0.174629	0.190635	0.131183	0.0392157	0.175676	0.0861111
Kcnip3	0.0345212	0.029654	0.041806	0.0451613	0.00326797	0.0135135	0.0416667
Zfp661	0.00890869	0.0214168	0.0083612	0.0107527	0.00326797	0.0045045	0.00833333
Mrps5	0.493318	0.433278	0.501672	0.604301	0.349673	0.511261	0.452778
Mal	0	0.00164745	0	0	0	0	0
Nphp1	0.134744	0.138386	0.170569	0.195699	0.0784314	0.222973	0.158333
1500011K16Rik	0.478842	0.530478	0.658863	0.677419	0.676471	0.824324	0.536111
Bub1	0.148107	0.0939044	0.0735786	0.369892	0.133987	0.11036	0.119444
Bcl2l11	0.213808	0.200988	0.16388	0.148387	0.245098	0.173423	0.144444
Gm14005	0.306236	0.0939044	0.214047	0.322581	0.22549	0.436937	0.252778
Gm29010	0.00111359	0	0	0.00215054	0	0	0
Gm39929	0	0.00329489	0	0.00215054	0	0.0045045	0
Anapc1	0.378619	0.334432	0.48495	0.449462	0.558824	0.722973	0.372222
Mertk	0.0233853	0.0263591	0.0250836	0.0107527	0.0294118	0.0855856	0.0166667
Tmem87b	0.286192	0.319605	0.351171	0.253763	0.212418	0.38964	0.222222
Fbln7	0.018931	0.0280066	0.0133779	0.0322581	0.00653595	0.0135135	0.244444
Zc3h8	0.0512249	0.0411862	0.0602007	0.0903226	0.0490196	0.0653153	0.0472222
Gm10762	0.0400891	0.0362438	0.0267559	0.0623656	0.0261438	0.0427928	0.0472222
Zc3h6	0.0657016	0.0823723	0.0919732	0.0365591	0.0392157	0.0608108	0.0444444
Ttl	0.159243	0.092257	0.11204	0.172043	0.0947712	0.135135	0.194444
Polr1b	0.103563	0.0510708	0.0702341	0.174194	0.0588235	0.0743243	0.0583333
Chchd5	0.604677	0.723229	0.667224	0.47957	0.421569	0.567568	0.502778
Slc20a1	0.104677	0.0428336	0.0652174	0.141935	0.101307	0.0653153	0.163889
Ckap2l	0.191537	0.210873	0.242475	0.660215	0.320261	0.292793	0.255556
Il1a	0.00334076	0	0.00167224	0.00430108	0.00326797	0	0
Il1b	0.00111359	0.00164745	0	0.00215054	0	0	0
Sirpa	0.209354	0.15486	0.215719	0.210753	0.29085	0.191441	0.230556
Stk35	0.120267	0.0675453	0.103679	0.156989	0.124183	0.123874	0.122222
Snrpb	3.39532	3.0659	3.40301	4.81935	3.54248	3.73198	3.19167
Nop56	1.08352	0.785832	0.801003	2.22581	0.578431	1.01577	0.666667
Idh3b	0.72049	0.878089	0.928094	0.756989	0.490196	0.963964	0.675
Ebf4	0.00445434	0.00494234	0	0	0	0	0
Cpxm1	4.10579	4.30478	1.70736	0.88172	1.36275	0.997748	3.04167
1700020A23Rik	0.00111359	0.00164745	0	0	0.00326797	0	0.00277778
Pced1a	0.128062	0.121911	0.105351	0.148387	0.0653595	0.0675676	0.127778
Vps16	0.244989	0.182867	0.215719	0.337634	0.173203	0.234234	0.205556
Ptpra	0.734967	0.90939	0.966555	0.64086	0.771242	0.977477	0.772222
Mrps26	0.858575	0.802306	0.971572	1.46452	0.839869	0.939189	0.855556
Avp	0.00334076	0.00164745	0	0	0	0.00225225	0
Ubox5	0.0356347	0.0345964	0.0250836	0.0623656	0.0196078	0.0315315	0.0305556
Fastkd5	0.0712695	0.0543657	0.0518395	0.0989247	0.0261438	0.0675676	0.0527778
Lzts3	0.0100223	0	0.00668896	0.0107527	0.00653595	0.00675676	0.0138889
Ddrgk1	1.10022	1.28336	1.27425	0.907527	0.771242	1.28378	1.09167
Itpa	0.552339	0.444811	0.474916	0.944086	0.48366	0.556306	0.533333
Slc4a11	0.0111359	0.00494234	0.00501672	0.00430108	0.00326797	0	0.0111111
4930402H24Rik	0.226058	0.172982	0.202341	0.152688	0.205882	0.216216	0.213889
Atrn	0.101336	0.0724876	0.0936455	0.103226	0.101307	0.0900901	0.147222
Gfra4	0.0801782	0.105437	0.0535117	0.088172	0.0294118	0.0945946	0.0666667
Adam33	0.10245	0.163097	0.347826	0.0924731	0.0196078	0.635135	0.0777778
Siglec1	0	0.00164745	0	0	0	0	0
Hspa12b	0.0334076	0.0560132	0.0451505	0.027957	0.0196078	0.0225225	0.0611111
1700037H04Rik	0.201559	0.153213	0.197324	0.264516	0.124183	0.184685	0.238889
Spef1	0.0222717	0.0378913	0.0401338	0.0365591	0.0392157	0.0675676	0.0333333
Cenpb	0.316258	0.257002	0.384615	0.376344	0.287582	0.463964	0.5
Cdc25b	0.0501114	0.07743	0.117057	0.230108	0.0882353	0.0968468	0.0861111
Ap5s1	0.224944	0.243822	0.255853	0.206452	0.133987	0.243243	0.272222
Mavs	0.103563	0.0906096	0.143813	0.12043	0.0457516	0.117117	0.1
Pank2	0.486637	0.406919	0.473244	0.47957	0.421569	0.472973	0.519444
Rnf24	0.0445434	0.0378913	0.0250836	0.0473118	0.0424837	0.027027	0.0666667
Smox	0.0612472	0.0691928	0.0752508	0.0580645	0.0163399	0.103604	0.0972222
Prnp	1.50668	0.614498	0.620401	0.933333	0.627451	2.57207	0.927778
Rassf2	0.199332	0.334432	0.409699	0.150538	0.29085	0.220721	0.188889
Slc23a2	0.0545657	0.0444811	0.0518395	0.0688172	0.0490196	0.0788288	0.05
Tmem230	0.605791	0.497529	0.635452	0.563441	0.359477	0.677928	0.580556
Pcna	0.628062	0.61944	0.643813	1.95914	0.95098	0.808559	0.597222
AV099323	0.0256125	0.0280066	0.0284281	0.0322581	0.0294118	0.0337838	0.0166667
Cds2	0.143653	0.110379	0.170569	0.197849	0.0882353	0.317568	0.138889
Prokr2	0.00222717	0.00494234	0.00334448	0.00645161	0.00326797	0.182432	0
4921508D12Rik	0.00222717	0	0	0	0.00326797	0.00225225	0
Gpcpd1	0.212695	0.222405	0.309365	0.176344	0.166667	0.572072	0.205556
1110034G24Rik	0.106904	0.118616	0.188963	0.126882	0.0686275	0.216216	0.0916667
Chgb	0	0.00164745	0	0	0	0	0
Trmt6	0.449889	0.332784	0.397993	0.83871	0.48366	0.454955	0.327778
Mcm8	0.0534521	0.0345964	0.0367893	0.204301	0.0686275	0.0698198	0.0472222
Crls1	0.623608	0.499176	0.929766	0.832258	0.555556	1.06757	0.386111
Lrrn4	0.521158	1.21911	2.699	1.23441	0.584967	3.37387	0.0333333
Bmp2	0.0278396	0.00823723	0.0250836	0.0967742	0.0424837	0.0518018	0.0222222
Hao1	0.00111359	0	0	0	0	0	0
Tmx4	0.17706	0.138386	0.185619	0.189247	0.120915	0.202703	0.188889
Plcb1	0.0423163	0.029654	0.0217391	0.0258065	0.00326797	0.0540541	0.0305556
Platr3	0.00334076	0.00164745	0	0	0	0.00225225	0.00555556
Plcb4	0.244989	0.133443	0.108696	0.109677	0.0947712	0.126126	0.233333
Ankef1	0	0	0	0	0.00326797	0.00225225	0
Mkks	0.162584	0.135091	0.147157	0.197849	0.0915033	0.193694	0.188889
Slx4ip	0.0857461	0.0724876	0.0802676	0.111828	0.0588235	0.0518018	0.0944444
Jag1	0.24833	0.108731	0.0852843	0.172043	0.173203	0.132883	0.213889
Gm14055	0	0	0	0	0	0	0
Btbd3	0.0701559	0.0428336	0.0602007	0.055914	0.0816993	0.0495495	0.0722222
Ism1	0.0111359	0.0131796	0.00501672	0.0129032	0.0130719	0.00900901	0.0166667
Tasp1	0.141425	0.125206	0.117057	0.178495	0.0686275	0.177928	0.105556
Esf1	0.802895	0.800659	0.677258	1.04301	1.10458	0.720721	0.680556
Ndufaf5	0.148107	0.0741351	0.137124	0.221505	0.107843	0.126126	0.194444
Macrod2	0.191537	0.143328	0.187291	0.258065	0.176471	0.211712	0.244444
Flrt3	0.0400891	0.0345964	0.0284281	0.0645161	0.0326797	0.0382883	0.294444
Kif16b	0.0556793	0.0560132	0.132107	0.0967742	0.0522876	0.123874	0.05
Snrpb2	1.4755	1.45799	1.6689	1.75269	2.0098	1.40315	1.36944
Pcsk2os1	0.00222717	0	0.00167224	0	0	0.00225225	0
Pcsk2	0	0	0	0	0	0	0.00277778
Bfsp1	0.0790646	0.0609555	0.115385	0.055914	0.0130719	0.0518018	0.0583333
Dstn	3.25724	2.9028	3.82274	3.44086	4.04248	5.11937	4.87222
Rrbp1	7.57572	5.76277	5.08194	5.2129	7.31373	3.93018	8.97778
Banf2os	0.0534521	0.00329489	0.00167224	0.0193548	0.0196078	0.00225225	0.0583333
Gm5535	0.0501114	0.00164745	0.00334448	0.0215054	0.0261438	0.00225225	0.05
Snx5	1.12806	1.03954	1.04682	1.30323	0.836601	0.932432	1.075
Mgme1	0.096882	0.103789	0.0769231	0.2	0.0522876	0.0833333	0.0777778
Kat14	0.14922	0.0856672	0.132107	0.195699	0.0915033	0.13964	0.158333
Dzank1	0.0077951	0.00494234	0.0167224	0.00860215	0.00326797	0.0045045	0.0166667
Polr3f	0.101336	0.0939044	0.0986622	0.122581	0.0718954	0.108108	0.125
Rbbp9	0.214922	0.252059	0.20903	0.152688	0.101307	0.236486	0.15
Sec23b	0.494432	0.401977	0.426421	0.649462	0.607843	0.619369	0.391667
Smim26	0.311804	0.253707	0.244147	0.372043	0.369281	0.331081	0.336111
Dtd1	0.374165	0.329489	0.307692	0.31828	0.166667	0.297297	0.288889
Slc24a3	0.00890869	0.0230643	0.0200669	0.0172043	0.00326797	0.0112613	0.0222222
Rin2	0.218263	0.298188	0.200669	0.137634	0.124183	0.209459	0.336111
Naa20	1.34744	1.53377	1.52843	2.08387	1.1732	1.81532	1.26944
Crnkl1	0.299555	0.227348	0.319398	0.384946	0.29085	0.351351	0.333333
Ralgapa2	0.0868597	0.0329489	0.0585284	0.105376	0.0751634	0.0675676	0.0472222
Kiz	0.589087	0.902801	1.1204	0.698925	0.294118	1.57883	0.211111
Xrn2	0.899777	0.797364	0.886288	0.993548	0.640523	0.921171	0.65
AI646519	0	0	0	0	0	0	0
Pax1	0	0.00164745	0.00167224	0.00430108	0	0	0
Foxa2	0.0244989	0.00658979	0.0568562	0.223656	0.163399	0.0405405	0.00277778
Thbd	0.131403	0.115321	0.647157	0.670968	0.352941	0.702703	0.0916667
Cd93	0.0211581	0.00164745	0.00668896	0.0172043	0	0.00675676	0.00277778
Nxt1	0.485523	0.454695	0.468227	0.948387	0.552288	0.641892	0.469444
Gzf1	0.13029	0.128501	0.143813	0.154839	0.147059	0.175676	0.119444
Napb	0.0244989	0.029654	0.0334448	0.027957	0.0196078	0.045045	0.0277778
Cst12	0	0	0.00167224	0	0	0.00900901	0
Cst9	0.0111359	0.00988468	0.0602007	0.0107527	0.0130719	1.69144	0.00555556
9230104L09Rik	0	0	0.0083612	0.00430108	0	0.0698198	0
Cst3	9.13586	12.1779	10.699	6.73333	8.40196	16.6599	8.23333
Syndig1	0.00111359	0.00329489	0.00167224	0	0	0.00225225	0.0166667
Zfp120	0.174833	0.133443	0.155518	0.174194	0.147059	0.173423	0.152778
Zfp937	0.119154	0.126853	0.118729	0.0946237	0.0163399	0.0855856	0.05
Gm21994	0.0144766	0.014827	0.0100334	0.00645161	0	0.00675676	0.00277778
Gm14124	0	0.00164745	0	0	0.00326797	0	0.00277778
3300002I08Rik	0.018931	0.0345964	0.0183946	0.0150538	0.00653595	0.018018	0.0138889
Gm10130	0.00222717	0	0	0	0	0	0.00277778
Zfp442	0.142539	0.107084	0.110368	0.109677	0.0490196	0.0855856	0.108333
Zfp345	0.00111359	0.00658979	0	0	0.00326797	0	0.00277778
Apmap	0.267261	0.247117	0.324415	0.32043	0.202614	0.355856	0.244444
Acss1	0.00222717	0	0.00167224	0.00430108	0.00326797	0.00675676	0
Gm26681	0	0.00164745	0.00167224	0	0	0	0
Entpd6	0.131403	0.0691928	0.0685619	0.139785	0.0653595	0.0563063	0.133333
Pygb	0.227171	0.200988	0.202341	0.227957	0.127451	0.22973	0.252778
Abhd12	0.435412	0.3229	0.396321	0.404301	0.183007	0.405405	0.461111
Gins1	0.128062	0.0823723	0.0936455	0.303226	0.114379	0.11036	0.0916667
Ninl	0.224944	0.176277	0.180602	0.294624	0.189542	0.274775	0.119444
Nanp	0.0100223	0.00823723	0.0083612	0.0215054	0	0.00225225	0.00833333
Nsfl1c	0.829621	0.710049	0.951505	0.890323	0.473856	0.878378	0.775
Gm14167	0.0233853	0.014827	0.0234114	0.0365591	0.0196078	0.0405405	0.0166667
[truncated: 15,395 more rows]
