# Supplementary material for: Single-cell transcriptomics defines heterogeneity of epicardial cells and fibroblasts within the infarcted murine heart
Source: eLife. 2021 Jun 21;10:e65921. doi: 10.7554/eLife.65921 (PMC8216715; doi:10.7554/eLife.65921)
Supplement: Supplementary file 7. [file elife-65921-supp7.xlsx]

## Sheet: avg.expr.
avg. expr.	A			B			C			D			E			F			G			H			I			J			K			L			M			N			O
gene	EpiSC	aCSC	CSC	EpiSC	aCSC	CSC	EpiSC	aCSC	CSC	EpiSC	aCSC	CSC	EpiSC	aCSC	CSC	EpiSC	aCSC	CSC	EpiSC	aCSC	CSC	EpiSC	aCSC	CSC	EpiSC	aCSC	CSC	EpiSC	aCSC	CSC	EpiSC	aCSC	CSC	EpiSC	aCSC	CSC	EpiSC	aCSC	CSC	EpiSC	aCSC	CSC	EpiSC	aCSC	CSC
0610005C13Rik	0	0	0	0	0.000634841	0	0	0		0	0.0022044	0.00320924	0	0	0	0	0.000451008	0	0	0	0.000593465	0	0.000313438	0	0	0.000701094	0	0	0.00059126	0	0	0	0.00277374	0	0	0.00126138	0	0	0.000854961	0	0	0	0	0	0
0610009B22Rik	0.934995	0.522597	0.522183	0.931546	0.56682	1.88537	0.703878	0.590296		0.851324	0.313901	0.417953	0.817723	0.432181	0.422237	0.700776	0.476739	0.35209	0.652495	0.309924	0.456851	0.600041	0.471517	0.336639	0.667426	0.969631	0.172002	1.37788	0.556183	0.546698	0.918078	0.284383	0.466997	0.925244	0.525948	0.473153	0.758298	0.546296	0.425034	0.885652	0.749084	0.624606	1.21842	0.757647	1.53765
0610009O20Rik	0.129725	0.133494	0.284962	0.183793	0.165258	0	0	0.143954		0.135345	0.159456	0.223232	0.0644695	0.143343	0.0916837	0.115395	0.171798	0.176871	0.140151	0.108406	0.146695	0.114996	0.117576	0.252361	0.19485	0.10829	0.133296	0.345758	0.18287	0.256203	0.125	0.207788	0.21653	0.154221	0.178524	0.224705	0.20568	0.204936	0.248983	0.650485	0.572776	0.649007	0.311151	0.325275	1.0073
0610010F05Rik	0.23869	0.167629	0.106054	0	0.165602	0	0	0.0892264		0.174219	0.0709426	0.198655	0.406872	0.134962	0.212303	0.143347	0.115903	0.109884	0.0980221	0.17109	0.10907	0.0920592	0.102759	0.103785	0.205547	0.172662	0	0.14318	0.147035	0.0734285	0.137367	0.0909488	0.136739	0.206573	0.148815	0.158278	0.168886	0.246722	0.128537	0.120524	0.19911	0.227577	0.20104	0.216904	0
0610010K14Rik	0.332353	0.373478	0.253486	0.317233	0.244564	0.314347	0	0.161097		0.390378	0.268971	0.442245	0.48666	0.338741	0.352385	0.430828	0.346351	0.34336	0.290311	0.220994	0.31118	0.397797	0.210726	0.294852	0.370436	0.2597	0.32376	0.665268	0.338769	0.31441	0.450001	0.189087	0.487927	0.443898	0.289023	0.502558	0.378649	0.2001	0.420003	0.621615	0.616855	0.804309	0.585128	0.451131	0.415744
0610012D04Rik	0	0	0	0	0	0	0	0		0	0	0	0	0	0	0.00134314	0.000978828	0	0.00156241	0	0	0	0.00136037	0	0	0.000691921	0	0	0.000813524	0	0.000962866	0	0	0.00148271	0	0	0	0	0	0	0	0	0	0.000587996	0
0610012G03Rik	1.15088	0.948716	0.891606	0.874908	1.11136	0.69126	0.703878	1.13323		1.2629	0.805041	1.40051	0.94299	1.39014	1.72237	1.41524	1.18444	1.19843	1.57599	0.749779	1.46837	1.29308	1.48388	1.42195	1.75748	1.50625	1.15531	1.26982	1.33023	0.968799	1.30351	1.02388	0.965043	1.50295	1.3318	1.14209	1.44395	1.51229	1.19294	1.01358	1.12391	1.17695	1.15915	1.19488	1.71973
0610025J13Rik	0.0141146	0	0	0.0624395	0.0131432	0.153544	0	0.011929		0.00792991	0.00341679	0.00847827	0	0.0167494	0	0.00598003	0.0151902	0.00153423	0.0129787	0.0109389	0.00355935	0.00860553	0.00806071	0	0.00814001	0.0104245	0	0	0.00759158	0	0.0168177	0	0.00584257	0.0207465	0.00477599	0.00601833	0.0247454	0	0.00759158	0.0340745	0	0.0071676	0.0096749	0.0112499	0
0610030E20Rik	0.228023	0.175338	0.296485	0.154816	0.199096	2.54535	0	0.245926		0.148325	0.138304	0.350563	0.224827	0.240801	0.0555775	0.171188	0.200592	0.311963	0.259454	0.318838	0.296557	0.176236	0.256033	0.514006	0.132827	0.254297	0.0998363	0.178052	0.352965	0.337816	0.255097	0.553926	0.339499	0.263542	0.255339	0.318445	0.297167	0.193843	0.383899	0.352638	0.408948	0.371505	0.248253	0.246905	1.0073
0610037L13Rik	0.698119	0.717354	0.494689	0.509083	0.550966	0.307088	0.703878	0.456855		0.72954	0.458034	0.71998	0.576757	0.7022	0.818834	0.870685	0.778803	1.04452	0.862452	0.968115	0.852632	0.850381	0.831237	0.722269	0.946399	0.930083	0.689737	0.81033	0.83506	0.727807	0.918775	1.5605	0.772209	0.981652	0.874691	0.871925	0.991904	0.696443	0.847016	0.953914	0.630488	0.607092	1.05955	0.815974	0.194382
0610038B21Rik	0.0144262	0	0	0.0690217	0.0203841	0	0	0.0233743		0.0125855	0.00567467	0.064432	0	0.00761118	0	0.00915888	0.0103476	0.0136187	0.00829517	0.00196873	0.0144369	0.0164791	0.0131781	0	0.0119902	0.00930955	0	0	0.00841679	0.00986255	0.00965626	0.0224325	0.00814325	0.00740136	0.0109587	0.00767055	0.0146589	0	0.0061369	0.028983	0	0.013765	0	0.00551055	0
0610039K10Rik	0	0	0	0	0.00130567	0	0	0.00341351		0.00199049	0.00359571	0	0	0.00292418	0	0.00103027	0.00175398	0	0.00133219	0.00224396	0.00345964	0.0048702	0.00585111	0	0	0.00444817	0	0	0.00252372	0	0.00164294	0	0.00203281	0.00490233	0.00192622	0.00209707	0.00117654	0	0.00166046	0	0	0	0	0.0017606	0
0610040B10Rik	0.0289152	0	0.0162712	0.0489541	0.0314247	0	0	0.0381189		0.0273772	0.0201719	0.0334312	0	0.0382322	0.200453	0.0242857	0.0262764	0.0225975	0.0227895	0.012194	0.033158	0.016982	0.0412599	0.020186	0.0472011	0.031375	0	0	0.0340552	0.0478365	0.0258845	0	0.0306244	0.0221362	0.0263682	0.0266715	0.00943781	0.0261055	0.0242729	0	0.0183453	0	0.00828873	0.0253554	0
0610040F04Rik	0	0	0	0	0.00131724	0	0	0.00298566		0.00025452	0.000908825	0	0	0	0	0.00127396	0.000995421	0	0.00110038	0	0	0.00100338	0.00102699	0	0	0.000383753	0	0	0.000762067	0	0	0	0	0	0	0	0	0	0	0	0	0	0	0	0
0610040J01Rik	0.00144912	0	0	0	0	0	0	0		0.00160209	0	0.00291879	0	0	0	0.000920887	0.00086891	0	0.0014747	0	0	0.00027748	0.000589177	0	0	0.00134595	0	0	0.000320736	0	0	0	0.00081633	0.00149703	0	0	0	0	0.000281416	0	0	0	0	0	0
0610043K17Rik	0.0055504	0	0.0119655	0	0.0122626	0	0	0.0115397		0.00441985	0.00112895	0	0	0.00459868	0.0524973	0.000856568	0.00068754	0.00728499	0.0033021	0	0.00125672	0.000359229	0.00161518	0	0	0.00178529	0	0	0.00405368	0	0.00478861	0	0.0116291	0.00290686	0.00501986	0.00563549	0.00369141	0	0.00859203	0	0	0	0	0.000815748	0
0710001A04Rik	0	0	0	0	0.000458128	0	0	0		0	0	0	0	0	0	0	0	0	0	0	0	0	0.00242082	0	0	0.00048214	0	0	0.000758397	0	0	0	0	0	0	0	0	0	0	0	0	0	0	0.000369028	0
1010001B22Rik	0.0128435	0	0.0487055	0	0.0159168	0	0	0.0196543		0.00718834	0.0011721	0.00206593	0	0.027321	0	0.00454365	0.00563479	0.00551864	0.0136372	0.00259814	0.0211175	0.00315353	0.0145598	0	0.0180592	0.0167398	0	0	0.0124102	0	0.0232532	0	0.0123474	0.0195396	0.00818644	0.0134279	0.0201344	0	0.0133291	0	0	0.00725748	0.00629524	0.00322395	0
1010001N08Rik	0.183397	0.0622486	0.315982	0.457133	0.178928	0.192086	0	0.160715		0.130391	0.0594266	0.0511067	0	0.0889718	0	0.0335741	0.0191806	0.0143562	0.0298929	0.0361715	0.0301996	0.0282383	0.0227196	0	0.0188906	0.0199719	0.0991631	0.0777849	0.0410925	0.0442443	0.0894462	0	0.0494102	0.0273251	0.0366215	0.0197388	0.0352669	0.140473	0.0229879	0	0	0.0185697	0.00666406	0.0134297	0
1110002E22Rik	0.00134795	0	0.00775576	0	0.000949477	0	0	0.00185766		0.00220329	0	0	0	0.00161691	0	0.00231308	0.00212693	0	0.00110038	0	0.0021844	0.00318742	0.00281675	0	0	0.00132458	0	0	0.000620251	0.0125009	0.000921641	0	0.000787128	0.00270481	0	0.00043932	0	0.0179355	0.000473094	0	0	0	0	0.00113415	0
1110002J07Rik	0	0	0	0	0.000444199	0	0	0		0	0	0	0	0	0	0	0	0	0	0	0	0	0.000427202	0	0	0.000164176	0	0	0.000476541	0	0	0	0	0	0	0	0	0	0	0	0	0	0	0	0
1110002L01Rik	0.0245355	0.0354836	0.0638359	0	0.030045	0.153544	0	0.0224723		0.0236098	0.0376971	0.0373785	0	0.0193769	0	0.0303467	0.0395383	0.0159586	0.0476186	0.0322864	0.0331168	0.0368799	0.0339734	0.0756424	0.0167991	0.0331172	0	0.0634046	0.0376422	0.0318526	0.0386843	0	0.0470486	0.0242511	0.0333607	0.0361007	0.0247991	0	0.0359353	0.0225665	0	0.0370769	0.0276319	0.0218027	0
1110002O04Rik	0.0514995	0	0.127304	0	0.0315479	0	0	0.0659881		0.00769918	0.00141843	0	0	0.00261244	0	0.00728636	0.00280737	0.0015098	0.0043249	0	0.00768272	0.00592103	0.00669144	0	0.00724016	0.0101511	0.0954153	0.0415628	0.00659414	0.0117389	0.0182038	0	0.00643563	0.0196649	0	0.00575403	0.00707775	0	0.00427659	0	0	0	0	0.00135291	0
1110004E09Rik	0.285867	0.425281	0.359052	0.137439	0.165414	0	0	0.206817		0.318985	0.2743	0.537554	0.222051	0.17578	0.11178	0.328641	0.274295	0.282042	0.193223	0.207439	0.218723	0.217395	0.190632	0.228732	0.456694	0.251277	0.543593	0.245488	0.267011	0.264552	0.265497	0.263974	0.292774	0.345056	0.227852	0.31006	0.294721	0.20085	0.288798	0.639798	0.391586	0.347517	0.449201	0.405801	0.194382
1110004F10Rik	1.95711	1.91366	2.05847	1.96785	1.57551	0.659977	0.703878	1.73325		2.16348	1.27083	1.83163	1.73603	1.54788	1.68768	2.13684	1.82969	1.77751	1.55505	1.29286	1.38867	1.74023	1.40048	1.59963	2.05031	2.1265	1.72561	2.55508	1.90604	1.73278	1.81696	1.78327	1.70868	2.06986	1.64765	1.77062	1.99497	1.28274	1.69751	3.24255	2.33145	2.11925	2.77132	2.63875	2.19487
1110006O24Rik	0.0117019	0	0.0386011	0	0.0136538	0	0	0.0276435		0.0162831	0.00973949	0.023761	0	0.0155215	0.0324005	0.017782	0.0254489	0.0138764	0.0188953	0.0386114	0.0172582	0.0131947	0.0284224	0	0	0.0288875	0	0.0307485	0.0177498	0	0.0179918	0.065033	0.0101608	0.0222631	0.0282563	0.00865986	0.012043	0.00591453	0.0107618	0	0	0.0272189	0.0230533	0.0178333	0
1110008F13Rik	2.98994	2.33994	0.977162	2.67343	2.04946	1.4735	0.703878	2.05279		3.04999	1.62543	1.80416	1.79235	1.60575	0.846699	2.73066	2.01856	1.53495	1.96385	1.1703	1.44426	2.22611	1.67641	1.25633	2.45112	2.00815	1.39943	2.10756	1.55613	1.03454	1.6873	1.70253	1.01928	2.04542	1.54878	1.25935	1.68523	1.21931	1.24448	1.80805	2.14833	1.60887	2.63568	2.01383	0.86931
1110008L16Rik	0.0803596	0.0644055	0.0919094	0.0624395	0.0715993	0	1.40776	0.113088		0.0714981	0.0614377	0.0213	0.0525547	0.0471302	0.0376012	0.0440245	0.0436946	0.0360374	0.0700094	0.0958587	0.0415637	0.0740771	0.0548017	0.0168666	0.0870771	0.0711798	0	0.0244236	0.0449691	0.0435089	0.0593774	0.0474522	0.0428323	0.0476722	0.0752172	0.0382439	0.0672799	0	0.0337513	0	0.083327	0.0192452	0.0389439	0.0243831	0
1110008P14Rik	0.808648	0.590709	0.573047	0.326051	0.66188	0.614175	0.703878	0.735252		0.681992	0.47196	0.570977	0.423785	0.729698	0.873378	0.53392	0.49715	0.595726	0.665772	0.323896	0.723976	0.518289	0.771268	0.668802	0.526239	0.752012	0.48094	0.756578	0.743872	0.673986	0.845872	0.987617	0.588452	0.711755	0.653988	0.588482	0.686623	0.376156	0.578593	0.33816	0.460317	0.581441	0.5564	0.563981	0
1110012L19Rik	0.522504	0.355704	0.547792	0.47906	0.459589	0.921888	0	0.517946		0.416439	0.194052	0.441653	0.136713	0.359394	0.251273	0.306296	0.246906	0.308557	0.349718	0.170116	0.326597	0.313636	0.308288	0.43879	0.344626	0.390987	0.563312	0.92882	0.369151	0.317648	0.42332	0.213217	0.392184	0.474582	0.354034	0.398419	0.409597	0.302791	0.359471	0.226321	0.263045	0.152488	0.303406	0.288596	0.58585
1110017D15Rik	0.00992158	0	0	0	0.00133212	0	0	0.0153875		0.00280081	0.00240759	0.00743422	0	0.00219183	0	0.00212531	0.00207042	0	0.00208836	0	0.0011348	0.000569665	0.00110466	0	0	0.00237434	0	0	0.00293655	0	0.00416556	0	0.00588676	0.0015186	0	0.00332911	0.00374779	0.026786	0.00342075	0	0	0	0	0.000600331	0
1110019D14Rik	0.0849253	0.13672	0.110642	0.0527869	0.123351	0	0	0.133222		0.0949415	0.0570202	0.0545138	0.169496	0.122374	0.137067	0.0764117	0.0649566	0.0822972	0.0961936	0.10802	0.095205	0.072256	0.0874893	0.093466	0.0615805	0.0958761	0	0.0561466	0.103858	0.0471687	0.103776	0.068734	0.0722103	0.114633	0.10469	0.0899775	0.090576	0.0797923	0.104538	0.165239	0.0943941	0.0730339	0.0477379	0.0830441	0
1110020A21Rik	0.0123694	0	0.018339	0	0.0125474	0.314347	0	0.0233795		0.0132703	0.00652207	0.0206698	0	0.0143187	0	0.00673978	0.00669248	0.00826832	0.00293738	0	0.00932327	0.00420579	0.00974653	0	0.0180592	0.00934969	0	0	0.0150494	0.00602747	0.0230169	0.0265508	0.0171675	0.0224636	0.00969581	0.0199001	0.0275686	0.019164	0.0202561	0.0804115	0.0378053	0.0283817	0.0331141	0.0307815	0.503651
1110032A03Rik	0.287886	0.121596	0.425599	0.333442	0.254338	2.38454	0.703878	0.336991		0.20814	0.119074	0.237618	0.105027	0.254435	0.125367	0.142813	0.180521	0.273084	0.285706	0.137861	0.263616	0.168577	0.253372	0.200755	0.222658	0.279182	0.3086	0.26832	0.263481	0.210141	0.389547	0.278055	0.316325	0.305098	0.21563	0.279694	0.2916	0.193772	0.277151	0.238689	0.204542	0.309243	0.273337	0.239339	0
1110032F04Rik	0	0	0	0	0.00109788	0	0	0.00309946		0.00209307	0	0.058617	0	0	0	0.000900621	0.00250298	0	0	0	0.00649263	0.00303953	0.00251555	0.0424992	0	0.00263633	0	0.0161119	0.00148729	0	0	0	0.00103406	0	0.00231217	0.000375426	0.0106523	0	0.00330369	0	0	0	0	0.00163924	0
1110034G24Rik	0.181483	0.168929	0.239145	0.27927	0.139049	0.192086	0	0.156424		0.0928342	0.0647719	0.17671	0	0.0890121	0.0682132	0.0575112	0.0498694	0.101461	0.0825787	0.119446	0.133048	0.0651345	0.0864116	0.130657	0.0911777	0.100851	0	0.0398001	0.154804	0.233283	0.160918	0.12234	0.1994	0.134624	0.131346	0.205446	0.150467	0.195191	0.205225	0.0692777	0.107124	0.0963267	0.110105	0.0728901	0.448144
1110035H17Rik	0.0082553	0	0.0189738	0	0.00515959	0	0	0.0129945		0.00458676	0.00315776	0.00470429	0	0.00551504	0	0.00231503	0.0101886	0.0181764	0.00220226	0	0.00894199	0.00314212	0.00730681	0	0.0141312	0.00441662	0	0	0.0109736	0.0260408	0.00721814	0.0316966	0.0103687	0.00407557	0.00313721	0.0121859	0.00458992	0	0.016284	0	0	0	0	0.0140685	0
1110038F14Rik	0.51076	0.504939	0.561856	0.357629	0.591971	2.35326	0.703878	0.530217		0.58239	0.431699	0.628094	0.728714	0.641468	0.906528	0.603054	0.720971	0.633708	0.626869	0.719977	0.660324	0.634817	0.743919	0.813985	0.591062	0.810377	0.637583	1.33638	0.751324	0.729688	0.606967	0.61431	0.663577	0.63948	0.754693	0.695232	0.708049	0.760499	0.767635	0.532883	0.648811	0.539494	0.702157	0.673132	0
1110046J04Rik	0.127546	0.115032	0.113199	0.121353	0.0840144	0	0	0.0876149		0.100584	0.106081	0.176464	0.221507	0.177055	0.342077	0.183335	0.162377	0.325289	0.274813	0.174282	0.24829	0.211118	0.243812	0.233577	0.21355	0.292745	0.123553	0.129059	0.266322	0.312086	0.352915	0.0989055	0.269824	0.294318	0.205111	0.290388	0.299784	0.341559	0.257723	0.259425	0.171283	0.19042	0.057058	0.132524	0
1110051M20Rik	0.257292	0.261325	0.181728	0.0489541	0.237205	0.192086	0.703878	0.228553		0.207471	0.162557	0.209246	0.157581	0.183308	0.221506	0.210678	0.161476	0.182973	0.197778	0.182137	0.213683	0.205149	0.180163	0.289148	0.153029	0.202516	0.158666	0.290935	0.21674	0.227662	0.242399	0.0378193	0.25941	0.23366	0.16919	0.272666	0.24636	0.133201	0.252818	0.283187	0.154221	0.281816	0.179386	0.207809	0.359066
1110059E24Rik	0.393914	0.563697	0.302759	0.568714	0.399371	0.153544	0	0.387711		0.457327	0.314491	0.385997	0.432187	0.347112	0.256933	0.409793	0.43544	0.397604	0.416313	0.279886	0.311572	0.358069	0.301616	0.451727	0.370386	0.311836	0.447756	0.741661	0.44492	0.346095	0.391916	0.230405	0.406012	0.405127	0.412291	0.406922	0.418149	0.340084	0.437358	0.602608	0.576299	0.528627	0.5103	0.461694	0.421165
1110059G10Rik	0.32033	0.372957	0.333967	0.152774	0.381164	1.88537	0.703878	0.31486		0.333509	0.350951	0.333293	0.266287	0.378432	0.979546	0.317276	0.306643	0.319207	0.379631	0.279388	0.372081	0.304327	0.331771	0.419108	0.433543	0.349	0.645821	0.445328	0.399573	0.341386	0.502599	0.307063	0.409093	0.384824	0.398666	0.368404	0.378413	0.310435	0.392306	0.33465	0.325374	0.335323	0.266345	0.300667	0
1110065P20Rik	0.985337	0.790298	0.978677	1.20858	0.888402	0.729802	0.703878	0.961266		1.00864	0.598221	1.01755	1.04692	0.706208	0.470085	0.871009	0.85616	0.902314	1.11174	0.497429	0.999405	0.955447	1.09184	0.844424	1.12112	1.25344	1.41581	0.823423	0.939665	0.724991	0.964912	0.739089	0.685921	0.94984	0.890018	0.822364	1.04471	0.60715	0.871882	1.09631	0.922073	0.689212	0.854961	1.01589	0.388765
1190001M18Rik	0.000723941	0	0	0	0.000716502	0	0	0.00207578		0.00251466	0	0	0	0.000475041	0	0.00240714	0.000612825	0	0	0	0	0	0.00023968	0	0.00712251	0.00037537	0	0	0.000432203	0	0.00151409	0	0	0	0	0	0	0	0	0	0	0	0.0294188	0.00204465	0
1190002N15Rik	0.936563	0.663466	2.92656	0.339158	0.544133	0	2.11164	1.15355		0.322135	0.181349	0.102855	0	0.107136	0.282327	0.087134	0.0791032	0.119146	0.0704882	0.10879	0.0700163	0.0638909	0.0812625	0.109498	0.0705334	0.0718562	0	0.0286705	0.10322	0.150407	0.104839	0.0265508	0.133235	0.0758836	0.061859	0.107086	0.0759397	0.0558619	0.124353	0.123786	0.110366	0.206961	0.102797	0.101073	0
1190005I06Rik	0.0121589	0.0195422	0.0228324	0.0903342	0.0339719	0	0	0.0226119		0.026742	0.0236657	0.0240545	0	0.0220145	0	0.0250097	0.0256203	0.0256866	0.0225632	0.0186001	0.0221886	0.0331418	0.0267426	0	0.0123087	0.0296488	0	0.00669936	0.0253159	0.0473785	0.0312802	0	0.0144474	0.0195765	0.0314218	0.023088	0.0220236	0.0395595	0.016745	0.0383052	0.0368376	0.0303933	0.059699	0.0216866	0.226783
1190007I07Rik	0.135835	0.0608048	0.170153	0.0489541	0.146805	0	0	0.175728		0.155064	0.117971	0.0785327	0.221507	0.138004	0.34633	0.0877191	0.0789278	0.126901	0.0974139	0.0822408	0.118516	0.112003	0.128411	0.249211	0.0804735	0.127149	0.214316	0.153936	0.131188	0.127362	0.156697	0.01469	0.157124	0.120192	0.106313	0.133079	0.132659	0.0593486	0.149968	0.037066	0.139781	0.167381	0.0424983	0.102503	0.221361
1200007C13Rik	0.00761028	0.0195422	0.0240561	0.211148	0.119641	0.153544	0	0.0259198		0.0473139	0.0214617	0.0152757	0	0.0468022	0	0.00838486	0.00948987	0.0220639	0.021036	0.0312167	0.0570862	0.0116496	0.00893879	0.180821	0.0556152	0.00386208	0.0865179	0	0.0315771	0.085292	0.107384	0.0680333	0.146593	0.00563271	0.0014845	0.013603	0.0102271	0	0.0638799	0	0	0	0	0.00108184	0
1300002E11Rik	0.237002	0.234563	0.412662	0.295032	0.186797	0	0.703878	0.181777		0.248762	0.0882665	0.322795	0.269286	0.222051	0.459243	0.325211	0.176892	0.300556	0.314883	0.113195	0.274373	0.24058	0.242348	0.163159	0.306088	0.383424	0.408888	0.335866	0.311026	0.497905	0.414215	0.288196	0.297894	0.38249	0.287734	0.29652	0.336093	0.334459	0.299685	0.233022	0.10667	0.142851	0.415342	0.195973	0.194382
1300014J16Rik	0.0137171	0	0	0	0.00110734	0	0	0.0126131		0.0026061	0.0127361	0	0	0	0	0.000317504	0.000883439	0	0	0	0	0.000544657	0.000625857	0	0	0.00031407	0	0	0.000757359	0	0	0	0	0	0	0	0.00121189	0	0	0	0	0	0	0.00378285	0
1300017J02Rik	0.00360284	0	0.0291466	0	0.00726773	0	0	0.0197157		0.00584388	0.00563066	0	0	0.00175625	0	0.00162154	0.000769729	0	0	0	0.00122827	0.00143551	0.0012616	0	0	0.00157062	0	0	0.00228914	0	0.000142925	0	0.00185552	0	0	0.0023182	0	0	0.00178628	0	0	0	0.00523738	0.00132357	0
1500002C15Rik	0.0119024	0	0.0444468	0	0.012821	0	0	0.0178527		0.00927181	0.00607796	0.0176772	0	0.0219506	0	0.0070038	0.0124524	0.0181988	0.0157011	0.0172545	0.0175948	0.00742102	0.0154487	0.0413507	0.0125983	0.012829	0.221725	0	0.0201373	0.00784193	0.0216481	0	0.0179837	0.0146253	0.0175004	0.0198207	0.0165652	0	0.0175931	0	0	0.0175902	0	0.0124061	0
1500009C09Rik	0.00338252	0	0.00374832	0	0.00122337	0	0	0		0.00111169	0.000869105	0.00160638	0	0.000798145	0	0.00243384	0.000825619	0.0134595	0	0	0	0	9.30725e-05	0	0	0	0	0	0.000857983	0	0	0	0	0.00559363	0.0329086	0.00198813	0	0.0215974	0	0	0	0	0	0	0
1500009L16Rik	0.0184423	0.120394	0.0252218	0.0749991	0.0588057	0	0	0.0416441		0.0477446	0.112875	0.329765	0	0.123551	0.0592831	0.19588	0.270611	0.555988	0.50188	0.223507	0.318066	0.185437	0.30715	0.406308	0.320969	0.410618	0.508521	0.571238	0.775954	0.45676	0.398364	0.187382	0.375105	0.810793	0.657086	0.556815	0.940344	0.866648	0.518464	1.76336	1.17871	1.5825	1.32892	1.1839	0.669506
1500011B03Rik	0.0925061	0.0188421	0.132362	0.318634	0.0949271	0	0	0.104031		0.115946	0.0478719	0.119876	0	0.0954217	0.140534	0.102815	0.0611317	0.106619	0.0761912	0.099465	0.0585379	0.0811644	0.065225	0.0635799	0.0865024	0.0870155	0.0991631	0.00764105	0.080232	0.123102	0.082136	0	0.0820821	0.104999	0.0599892	0.0754284	0.0968826	0.0540848	0.0772885	0.0450561	0.0620667	0.0685626	0.0581352	0.0552171	0.359066
1500011K16Rik	0.652789	0.416901	0.551094	0.271741	0.530429	0.460631	1.40776	0.522006		0.51463	0.322096	1.10216	0.615278	0.439135	0.83995	0.482258	0.398995	0.555084	0.373503	0.29909	0.464542	0.427251	0.439009	0.446997	0.633231	0.520944	0.762112	0.88418	0.648394	0.67917	0.624493	0.440538	0.65854	0.646681	0.658443	0.732353	0.648854	0.508186	0.670232	0.352779	0.215233	0.347742	0.284826	0.379376	0.807211
1500015A07Rik	0.0279742	0.0195422	0.0539903	0	0.0151587	0	0	0.0434578		0.0122525	0.0165553	0.007934	0.0644695	0.0114851	0	0.015431	0.0148943	0.0174062	0.0177698	0.00892638	0.0143104	0.00712698	0.0135982	0	0.00969476	0.0100178	0	0.0060885	0.0189986	0.014212	0.0153273	0	0.0179186	0.0169662	0.0105303	0.0198139	0.0154638	0	0.0193797	0.0215731	0	0.0405605	0	0.0218251	0
1500015O10Rik	3.6697	2.15472	3.71728	3.71653	1.8067	1.23561	5.63103	5.0183		0.66943	0.513129	0.401642	0.0722439	0.318107	0.26303	0.243994	0.758744	0.242651	1.9712	1.79748	1.96983	0.867699	2.92769	0.670895	2.04411	3.83103	1.72502	1.11822	1.17182	0.104816	1.06912	2.05144	0.443613	0.31722	0.803461	0.0771742	0.142463	0.540359	0.057891	0.028983	0.324368	0.452779	0.286152	1.35899	0
1600002K03Rik	0.166638	0.242007	0.145831	0.168013	0.239771	0	0	0.204336		0.175864	0.252947	0.283157	0.0525547	0.220739	0.225704	0.210641	0.242844	0.278028	0.172122	0.155114	0.169897	0.225842	0.198997	0.112819	0.100138	0.145543	0.0845409	0.148125	0.202582	0.174405	0.167549	0.224449	0.172921	0.175254	0.22626	0.210141	0.190383	0.12325	0.211204	0.0688097	0.0416562	0.138691	0.0724763	0.0916246	0
1600010M07Rik	0	0	0	0	0	0	0	0		0	0	0	0	0	0	0	0	0	0	0	0	0	0.000262149	0	0	0.00031855	0	0	0.000280199	0	0	0	0	0	0	0	0	0	0	0	0	0	0	0	0
1600012H06Rik	0.930714	0.668808	0.973227	0.363449	0.63212	2.07746	0	1.1594		0.371906	0.236483	0.297171	0.124799	0.405728	0.323115	0.392075	0.412942	0.398258	0.477247	0.41493	0.397033	0.403092	0.44416	0.230587	0.367544	0.419003	0.175304	1.05772	0.355455	0.205119	0.274384	0.162954	0.239886	0.330678	0.398996	0.278281	0.338556	0.262809	0.319199	0.210355	0.420155	0.391142	0.266384	0.400698	0
1600014C10Rik	0.164488	0.0385341	0.113502	0.183793	0.116403	0	0	0.120399		0.092256	0.0612121	0.0745606	0.105027	0.0905272	0	0.0899415	0.109795	0.100081	0.118969	0.119512	0.126465	0.109562	0.123735	0.0784987	0.141389	0.128235	0.169082	0.0514738	0.100671	0.0701084	0.0662135	0.0316449	0.0882825	0.0808914	0.105053	0.0900191	0.0816399	0.22487	0.100596	0.123788	0.0398038	0.0395626	0.0529983	0.0761357	0
1600014C23Rik	0.00230106	0	0	0	0.00135534	0	0	0		0.00269435	0	0	0	0.0016778	0	0.00255178	0.00134027	0	0	0	0	0.00272969	0.00122587	0	0	0.000529287	0	0	0.000921243	0	0.000865011	0	0	0.000735835	0	0	0	0	0	0	0	0	0	0.000399722	0
1600015I10Rik	0	0	0	0	0	0	0	0		0	0	0	0	0	0	0	0	0	0	0	0.0017397	0	0.000645008	0	0	0.00124181	0	0	0	0.00798695	0	0	0.000467268	0	0.00196205	0.000885641	0	0	0.00227741	0	0	0	0	0.000587163	0
1600020E01Rik	0.113901	0.132123	0.216755	0.197281	0.111489	0	0	0.175957		0.119125	0.0670197	0.0989015	0.0644695	0.142399	0.139263	0.0858637	0.0983786	0.153902	0.0924193	0.0747368	0.157015	0.0800784	0.123124	0.143638	0.0801282	0.14973	0.221725	0.0913791	0.136785	0.144635	0.175839	0.123431	0.173666	0.114437	0.119823	0.142469	0.159334	0.150798	0.169748	0.0443719	0.0761058	0.144796	0.0713889	0.10919	0
1600025M17Rik	0	0	0	0	0	0	0	0		0.000270418	0	0	0	0	0	0.000625086	0	0	0	0	0	0.000575201	0	0	0	0	0	0	0	0	0	0	0	0	0	0	0	0	0	0	0	0	0	0	0
1700001J03Rik	0	0	0	0	0	0	0	0.00135376		0	0	0.00049136	0	0	0	0	0.00118411	0	0	0.0168783	0.000765906	0	0.000450751	0	0	0.000673768	0	0	0.000748761	0	0	0	0.000775703	0	0	0.00166659	0	0	0.00236115	0	0	0	0	0	0
1700001L05Rik	0.00211354	0	0.00378053	0.0690217	0.00696048	0	0	0.0113268		0.00658056	0.00238117	0.0011805	0	0.00403921	0	0.00550642	0.00917977	0.00341155	0.00200688	0.0208135	0.00415143	0.00102759	0.00678223	0.0220323	0.0117809	0.00518234	0	0.00669936	0.00422568	0	0.00214997	0	0.00328671	0.00366082	0.00291355	0.00252913	0	0	0.00225596	0.0864691	0	0.0423209	0.0312134	0.0380595	0
1700001L19Rik	0.00388608	0	0.0370111	0	0.00362439	0	0	0		0.00302568	0	0.00249533	0	0.00817513	0	0.00150504	0.00248091	0.00334354	0.00897126	0.000734051	0.00350792	0.00341934	0.00538715	0	0.0178863	0.00722263	0	0	0.00258688	0	0.00309585	0	0.00412873	0.00699728	0.00231841	0.00278491	0.00107228	0	0.00201724	0	0	0	0	0.00427463	0
1700001O22Rik	0.00499707	0	0	0	0.00547335	0	0	0.00546357		0.00565214	0.0027809	0	0	0.00776454	0	0.00441876	0.00592849	0	0.00719109	0.00420977	0.00390321	0.00707772	0.00532207	0	0.013454	0.00408753	0	0	0.00473704	0.00843164	0.00315417	0	0.00400568	0.00719097	0.00769629	0.00535561	0.0011154	0	0.0051467	0	0	0.0101919	0.0125792	0.0111172	0
1700001P01Rik	0	0	0	0	0	0	0	0		0	0	0	0	0.00107903	0	0	0	0	0	0	0	0	0.000439701	0	0	0.000283327	0	0	0.00012259	0	0	0	0	0	0	0	0	0	0	0	0	0	0	0	0
1700003E16Rik	0	0	0.00596745	0	0.00405722	0	0	0		0.000676282	0.0089207	0.00543238	0	0.00160398	0	0.00184802	0.00419176	0.00839582	0.000775564	0	0.00378143	0.000684854	0.00284821	0	0	0.000517236	0	0	0.00438121	0.019987	0.00180701	0.0265508	0.00693413	0.00489938	0.00775442	0.0051206	0.0026643	0	0.00613169	0.0272109	0	0	0.00522736	0.00314306	0
1700003F12Rik	0.0114162	0	0.00620312	0	0.00580576	0	0	0.00278327		0.0063405	0.00981621	0.0197609	0	0.0242294	0.0685453	0.0204199	0.0176637	0.027608	0.0075866	0.00162148	0.00740302	0.0192903	0.011125	0	0.00765785	0.0089358	0	0	0.0102083	0	0.00902409	0	0.00154889	0.0160139	0.0531238	0.0138659	0.0129402	0	0.00517404	0	0.0439486	0.0115368	0.00917282	0.0100886	0
1700003M07Rik	0.00943723	0	0	0	0.0103267	0	0	0.00748073		0.0224088	0.0036987	0	0	0.0025226	0	0.013981	0.00895955	0.00108807	0.00370084	0	0.00785163	0.0131249	0.00585768	0	0.0196148	0.00350174	0	0.0290694	0.00222598	0	0.00764086	0	0	0.00376899	0	0.000489722	0.00161828	0	0.000421925	0	0	0	0	0.00213676	0
1700006H21Rik	0.00211447	0	0	0	0.00186491	0	0	0		0.00121414	0	0	0	0.000586426	0	0.000693743	0.000496204	0	0.00121746	0	0	0.00214055	0.000432753	0	0	0	0	0	0.000587085	0	0.00147806	0	0	0	0	0	0.0041889	0	0	0	0	0	0	0	0
1700007G11Rik	0.0130369	0	0	0	0.00173119	0	0	0		0.0112721	0.00199154	0.00304053	0	0.000670803	0	0.00184441	0.000442193	0	0.00104501	0	0.000733665	0.00106383	0.000582271	0	0	0.000230561	0	0	0.000526066	0	0	0	0.000817002	0	0	0.000977466	0	0	0.000680233	0	0	0	0	0.00371313	0
1700007K13Rik	0.0271991	0	0.0138838	0	0.0148373	0	0	0.0160978		0.0223197	0.0401218	0.0329793	0	0.0159706	0	0.0193285	0.0182172	0.0174359	0.0159077	0.0160927	0.013908	0.0159857	0.0147631	0	0.0127716	0.0176051	0	0.0152448	0.00431274	0	0.00809836	0	0.00209571	0.00556141	0.0124195	0.000336416	0.00707844	0	0.00077905	0	0	0	0.0211608	0.000560677	0
1700007P06Rik	0	0	0	0	0	0	0	0		9.53183e-05	0.000908825	0	0	0	0	0.00259999	0.0018728	0	0	0	0	0.0029756	0.00142025	0	0	0.000640104	0	0	0.000205472	0	0	0	0	0	0	0	0	0	0	0	0	0	0	0	0
1700008J07Rik	0.0788292	0.0429224	0.0938737	0	0.04465	0	0	0.0494722		0.0470194	0.0327275	0.102515	0.0525547	0.0478357	0	0.0368026	0.0424719	0.0753099	0.0467819	0.0188879	0.0539746	0.0504642	0.0488508	0	0.0401822	0.043186	0.123553	0.0830115	0.0546816	0.0109962	0.052865	0.0445937	0.0531207	0.0432667	0.0326587	0.045061	0.0552712	0.111499	0.0498923	0.0870388	0.0717002	0.0537213	0.0415657	0.0680103	0
1700008O03Rik	0.0114106	0.0188421	0	0	0.0111061	0	0	0		0.00252095	0	0.00683527	0	0.00451953	0.0616101	0.00244448	0.0022909	0.00866465	0.00537707	0.0040598	0.00435987	0.00285357	0.00505311	0	0.0065794	0.00458704	0	0	0.00213789	0	0	0	0.00497003	0.00368464	0.00501825	0.00238116	0.00185012	0	0.00398785	0	0	0	0	0.00192193	0
1700009N14Rik	0	0	0	0	0.00500095	0	0	0.0039731		0.00349128	0.00509035	0	0	0.00095063	0	0.00528889	0.00488956	0	0.000775564	0	0	0.00448162	0.00145204	0	0	7.22899e-05	0	0	0.000112682	0	0.000220619	0	0	0.0022622	0	0	0.0020743	0	0	0	0	0	0	0	0
1700010I14Rik	0.014497	0	0.0209247	0	0.0141265	0	0	0.00370173		0.0164507	0.00420232	0.00542636	0	0.0129609	0	0.00538025	0.00147044	0	0.00724306	0	0.00163912	0.0095168	0.00231316	0	0	0.00297139	0	0	0.00184246	0	0.0053191	0	0.00311404	0.00687971	0	0.00119349	0	0	0.00203128	0	0	0	0	0.00261192	0
1700011D18Rik	0	0	0	0	0.000409799	0	0	0.00337284		0.00156183	0	0	0	0.00144459	0	0.000574015	0.00252583	0	0.0014672	0	0.000623116	0.000550816	0.00139508	0	0	0.0014152	0	0	0.000748035	0	0.000678409	0	0	0.000591992	0	0.000262768	0	0	0.000440521	0	0	0	0	0.00175924	0
1700011L22Rik	0	0	0	0	0	0	0	0		0.000435876	0	0	0	0	0	0.00126914	0	0	0.000812245	0	0	0.000273673	0	0	0	0	0	0	0	0	0	0	0	0.00136901	0	0	0	0	0	0	0	0	0	0	0
1700012B07Rik	0	0	0	0	0.00131523	0	0	0		0	0.00107519	0	0	0	0	0	0.000740074	0	0	0	0	0	0.000854997	0	0	0.0006524	0	0	0	0	0	0	0	0	0	0	0	0	0	0	0	0	0	0.00044435	0
1700012C14Rik	0.00148351	0	0	0	0.00202511	0	0	0.00214264		0.00229237	0.00270054	0	0	0.00482914	0	0.0016446	0.000172066	0	0.00262178	0	0.00240309	0.000793383	0.00228005	0	0	0.00299487	0	0	0.0012306	0	0.000641833	0	0.000612606	0.00136158	0	0.000356182	0	0	0.000544574	0	0	0	0	0.000965167	0
1700015F17Rik	0.00412118	0	0	0	0.00113737	0	0	0		0.00168499	0	0	0	0.000647498	0	0.00144529	0.000316852	0.018066	0	0	0.00154788	0.000884133	0.00102268	0	0	0.000866811	0	0	0.00149697	0	0	0	0.00156835	0.00136605	0	0.00112847	0	0	0.00132222	0	0	0	0	0.000765507	0
1700016F12Rik	0	0	0	0	0.000313034	0	0	0.00226194		0	0.000990255	0	0	0	0	0	0.000170707	0	0	0	0	0	0.000409831	0	0	0	0	0	0.00013342	0	0	0	0	0	0	0	0	0	0	0	0	0	0	0	0
1700016G14Rik	0	0	0	0	0.00516871	0	0	0.00881178		0	0	0	0	0	0	0	0	0	0	0	0	0	0	0	0	0.001189	0	0	0	0	0	0	0	0	0	0	0	0	0	0	0	0	0	0	0
1700016H13Rik	0.00455219	0	0	0	0	0	0	0		0.00122892	0	0	0	0	0	0	0	0	0	0	0	0	0	0	0	0	0	0	0	0	0	0	0	0	0	0	0	0	0	0	0	0	0	0	0
1700016K19Rik	0	0	0	0	0	0	0	0		0	0	0	0	0	0	0	0.00106538	0	0	0	0	0	0.0036615	0	0	0.0033857	0	0	8.13979e-05	0	0	0	0	0	0	0	0	0	0	0	0	0	0	0	0
1700017B05Rik	0.209408	0.312489	0.255809	0.283075	0.261839	0.192086	0	0.164871		0.235429	0.154068	0.0899653	0.136713	0.144924	0.12999	0.140402	0.17167	0.175744	0.113187	0.141999	0.114005	0.121142	0.129714	0.159071	0.068474	0.0971194	0.181933	0.105532	0.121753	0.131398	0.114847	0.01469	0.15315	0.0962716	0.0908115	0.138406	0.0937023	0.270081	0.212694	0.184834	0.114147	0.199196	0.15676	0.117498	0
1700017L05Rik	0	0	0	0	0	0	0	0		0	0	0	0	0.000578248	0	0	0	0	0	0	0	0	0.000185034	0	0	0.000151352	0	0	0.000367671	0	0	0	0	0	0	0	0	0	0	0	0	0	0	0.00176134	0
1700017M07Rik	0	0	0	0	0	0	0	0		0.00164508	0	0	0.0525547	0	0	0.0102175	0	0	0.000854964	0	0	0.000263305	0	0	0	0	0	0	0	0	0	0	0	0.000264159	0	0	0.000195756	0	0	0	0	0	0.00484952	0	0
1700018L02Rik	0.0139352	0.0195422	0.00932671	0	0.0128818	0	0	0.0136978		0.0076297	0.00135526	0.0126967	0	0.00558189	0.0324005	0.00236622	0.00519548	0.00538423	0.00369323	0.00284479	0.00538901	0.00477807	0.00714226	0.0180553	0	0.00679755	0	0	0.00549221	0.0089408	0.00274954	0	0.00567672	0.00628465	0.00117648	0.00288154	0.00244396	0	0.00549916	0	0.0236995	0.0071676	0	0.00430538	0
1700019D03Rik	0.0190926	0	0.0158354	0	0.0172186	0	0	0.00717472		0.0159627	0.150744	0.177925	0	0.18246	0.340099	0.0830461	0.0463329	0.434748	0.0159656	0.0117171	0.0911064	0.0139416	0.019718	0.0685608	0.00724016	0.026433	0.185681	0.30834	0.283248	0.445286	0.289456	0.142167	0.325135	0.754189	0.559553	0.722355	0.399474	0.275207	0.351421	0.0626474	0.0165886	0.268877	0.255375	0.0880452	0
1700019G24Rik	0	0	0	0	0.000283363	0	0	0		0	0.000990255	0	0	0	0	0	0	0	0	0	0.0010592	0	0.000411541	0	0	0.000381257	0	0	0.00114318	0	0	0	0.000154746	0	0	0.0013765	0	0	0.000625466	0	0.021907	0	0	0	0
1700019L13Rik	0.018479	0.0435219	0.0238126	0.0489541	0.0371323	0	0	0.0423433		0.0268719	0.0121468	0.00497463	0	0.0108337	0	0.00825192	0.00815125	0	0.00786775	0.0636784	0.0104838	0.00506491	0.0035969	0	0.00996348	0.00209627	0	0.00805594	0.00430787	0.020924	0.00372573	0	0.00800285	0.00416887	0	0.00463405	0.00188769	0	0.00400869	0	0	0.00795499	0	0.00591989	0
1700020A23Rik	0	0	0	0	0	0	0	0		0.000422633	0	0	0	0	0	0.00149524	0	0	0	0	0	0	0	0	0	0	0	0	0	0	0	0	0	0.000202774	0	0	0	0	0	0	0	0	0	0	0
1700020D05Rik	0.00261376	0	0	0	0.00168826	0	0	0.00273289		0.000375088	0	0	0	0.00199762	0	0.000603504	0.00172465	0	0	0	0.00141955	0	0.00123914	0	0	0.000881617	0	0	0.000635357	0	0.0011628	0	0.000854908	0	0	0.00115618	0.00121906	0	0.00207223	0	0	0	0	0	0
1700020I14Rik	0.66004	0.717319	0.653408	0.643906	0.560558	0.153544	1.40776	0.504941		0.671135	0.499197	0.661589	0.672838	0.627042	0.167048	0.86273	0.701867	0.69971	0.70044	0.674219	0.592826	0.588402	0.606415	0.742747	0.621738	0.896183	0.724072	0.659764	0.770499	0.670714	0.714394	1.11903	0.494136	0.979564	0.821852	0.624329	0.915319	0.707602	0.546094	1.1154	0.931509	1.07279	1.28599	1.10514	1.58744
1700020L24Rik	0.00260111	0	0	0.0749991	0.00805832	0	0	0.00536098		0.00269248	0.00190501	0	0	0.0082327	0	0.0045238	0.0105348	0.00363715	0.00328734	0	0.00912138	0.00453411	0.0107988	0	0.0132005	0.0138406	0	0	0.00157235	0	0.000958502	0	0.000249031	0.00466901	0	0.000793956	0.00138254	0	0.000954921	0	0	0	0	0.00209029	0
1700021F05Rik	0.457919	0.364422	0.707562	0.530377	0.381989	0.192086	0	0.332877		0.515517	0.414283	0.554674	0.5362	0.41277	0.349885	0.554576	0.407682	0.531074	0.518038	0.482655	0.445882	0.490788	0.373797	0.505091	0.58638	0.550783	0.383032	0.878875	0.499276	0.739276	0.643042	0.573974	0.519267	0.653654	0.5416	0.548819	0.711211	0.146829	0.526458	0.590286	0.591654	0.612049	0.715224	0.584538	0.647949
1700021F13Rik	0.00285605	0	0.060397	0	0.0197465	0	0	0.0302574		0.014078	0.00607671	0.00886262	0	0.0130724	0	0.00170818	0.000405932	0	0	0.000798765	0.00127748	0.000250443	0.000960215	0	0	0.000848963	0	0	0.00527159	0	0.0250841	0	0.0151594	0.00927842	0.00606072	0.00693657	0.0026758	0	0.00455417	0	0	0	0	0	0
1700022I11Rik	0	0	0	0	0	0	0	0		0	0	0	0	0	0	0	0.00123458	0	0	0	0	0	0.000418693	0	0	0.000512055	0	0	0.000565768	0	0	0	0	0	0	0	0	0	0	0	0	0	0	0	0
1700022N22Rik	0.00486111	0	0	0	0.00245627	0	0	0		0.00224852	0.00148277	0.0016392	0	0.00149131	0	0.0050265	0.00107962	0.00226989	0.00112137	0	0.00176414	0.00133714	0.00156173	0	0	0.00209948	0	0	0.00302681	0	0.0115352	0	0.00214229	0	0.007032	0.00197554	0.000976156	0	0.00281884	0	0	0	0	0	0
1700023F02Rik	0	0	0	0	0	0	0	0		0	0	0	0	0	0	0	0	0	0	0	0	0	0	0	0	0	0	0	0	0	0	0	0	0	0	0	0	0	0	0	0	0	0	0	0
1700023F06Rik	0.105401	0.160634	0.295246	0.144021	0.134528	0.192086	0	0.185331		0.0508807	0.0172679	0.051925	0	0.0169911	0	0.00397718	0.00267117	0.00163682	0.00423177	0	0.00859863	0.00113302	0.00306557	0	0	0.00482729	0.0991631	0	0.013727	0.0119036	0.0275314	0.0207715	0.0204584	0.0104204	0.00485535	0.010702	0.00811256	0	0.00598587	0	0.0289834	0.020097	0	0.00246385	0
1700024B18Rik	0.00192152	0	0	0	0.000696835	0	0	0		0.000326917	0	0	0	0	0.0376012	0.000765706	0	0	0.00390206	0	0.00186999	0.000766891	0.00365606	0.0559914	0	0.00567128	0	0	0.00103065	0.010441	0.00655726	0	0.00221537	0.0025627	0	0.00133002	0.00196002	0	0.00109059	0	0	0	0	0.000875208	0
1700025G04Rik	0.548651	0.97004	0.468753	0.280393	0.460606	0	0	0.423684		0.354371	0.420883	0.599276	0.37409	0.474231	0.578831	0.365644	0.494014	0.901117	1.04321	0.407585	0.873164	0.351134	0.736837	0.780238	0.577894	0.655092	0.728059	0.831629	0.847956	0.697394	0.445472	0.557148	0.556771	0.874165	1.45481	1.02553	0.688001	0.815551	0.744777	0.816822	0.684209	1.2204	0.758589	0.757652	1.89129
1700025N23Rik	0	0	0	0	0.000294446	0	0	0		0.000144926	0	0	0	0.00423334	0	0.00218461	0.00118164	0	0	0	0.00125186	0.000726072	0.000358377	0	0	0.000277165	0	0	0.00015427	0	0	0	0.000260249	0.000798557	0.00219909	0.000605738	0.000300666	0	0.00168937	0	0	0	0	0	0
1700028I16Rik	0	0	0	0	0.00111888	0	0	0.00508737		0.000782061	0	0	0	0.000707565	0	0.000221371	0.00104388	0	0.00106276	0	0	0.00266527	0.000689087	0	0	0.000935471	0	0	0.000538154	0	0	0.01469	0	0	0	0	0	0	0	0	0	0	0	0.000788095	0
1700028J19Rik	0.00904374	0	0.0236657	0	0.0084808	0	0	0.0032064		0.00903014	0.00493098	0.0494944	0	0.00372286	0	0.0106948	0.00881003	0.00297702	0.0073552	0.00520454	0.00720474	0.00304537	0.00667551	0	0.0200117	0.00666571	0	0.0975058	0.00696065	0	0.00473146	0	0.00720417	0.00755272	0.0173191	0.00602522	0.0105908	0	0.0070324	0	0	0.0126224	0.0224277	0.00556207	0.194382
1700028K03Rik	0	0	0	0	0.00109212	0	0	0		0.000393625	0	0	0	0.00194892	0	0.000379919	0.000193199	0	0	0.00468829	0	0.000630599	0.00127809	0	0	0.000671567	0	0	0.000504958	0	0.000702516	0	0.00100853	0	0.00252193	0.000756123	0	0	0.00120184	0	0	0	0	0.000563278	0
1700028P14Rik	0	0	0	0	0	0	0	0		0	0	0	0	0	0	0	0.000496328	0	0	0	0	0	0.000275964	0	0	0.000461849	0	0	0.00130711	0	0	0	0.00177386	0	0.00293673	0	0	0	0.000608496	0	0	0	0	0	0
1700029I15Rik	0	0	0.0064138	0	0.00506944	0	0	0.00468265		0.00224839	0.00364923	0.00563239	0	0.00284561	0.0651067	0.00176122	0.00146392	0.00394227	0	0.00754196	0.0032541	0.00275517	0.00406823	0	0	0.00320673	0	0	0.00560333	0.0133564	0.00220886	0	0.0144531	0.00666708	0.00312676	0.00861739	0.00466757	0	0.0126626	0	0.0174672	0	0	0.00518611	0
1700029J07Rik	0.0256114	0.0354836	0.0270513	0	0.0189138	0	0	0.026263		0.0146305	0.00561415	0.0692152	0	0.0185975	0	0.00762696	0.0173402	0.0184382	0.0346556	0.109777	0.0300802	0.0077738	0.0279684	0.0271084	0.00551578	0.0273687	0	0	0.0287181	0.0652566	0.026483	0.0959398	0.0367504	0.0126543	0.0257056	0.0235643	0.0122625	0.0281122	0.0270095	0.0262147	0.0173664	0.0254437	0.0193231	0.020682	0
1700030C14Rik	0	0	0	0	0.000600278	0	0	0		0.001189	0.00166022	0	0	0.00205211	0	0.000868736	0.000544699	0	0	0	0	0.000570788	0.000132456	0	0	0	0	0	0	0	0	0	0	0	0.00427188	0	0.00348275	0	0	0	0	0	0	0.000512067	0
1700030J22Rik	0.00488	0	0.0106036	0	0.00345511	0	0	0		0.00146092	0.005008	0.0109642	0	0.0036589	0	0.00342733	0.00585103	0.039976	0.00554211	0	0.00610801	0.00403586	0.00370766	0	0.00552093	0.0038001	0	0	0.00349928	0.0104784	0.000907232	0	0.00265614	0.00268902	0.0124866	0.0034691	0.000860646	0	0.00557713	0	0.0236995	0	0	0.00081815	0
1700030K09Rik	0.0692434	0.05709	0.0929354	0	0.0579276	0	0	0.032358		0.0432493	0.034549	0.102093	0	0.0543832	0.0756999	0.0309306	0.0594597	0.0350919	0.0441614	0.0681171	0.0547315	0.0420128	0.053721	0.049629	0.0414778	0.0507802	0.0954153	0.0166945	0.0592572	0.0882517	0.0399373	0.127831	0.074637	0.0396302	0.0478744	0.0616736	0.0730886	0.0303606	0.0759589	0	0.0981137	0.02172	0.0555396	0.0420874	0
1700034E13Rik	0	0	0	0	0.000649534	0	0	0		0.00312515	0.000824114	0	0	0.000464359	0	0.00210901	0.00177921	0	0.00147177	0	0	0.00143053	0.00260452	0	0	0.00267796	0	0	4.89217e-05	0	0.000826941	0	0	0.00027443	0	0	0	0	0	0	0	0	0	0.000636275	0
1700034H15Rik	0.00259988	0	0	0	0.00296706	0	0	0.00246059		0.00117756	0	0	0	0.000651671	0	0.000849758	0	0.00233014	0	0	0.00126615	0	0.000645114	0	0.00611909	0.000423404	0	0	0.000309369	0	0	0	0.00110307	0	0	0.00112355	0.000900599	0	0.000823638	0	0	0	0.00666406	0	0
1700034P13Rik	0.00305712	0	0	0	0	0	0	0		0.00359277	0	0	0	0	0	0.00205658	0.000694228	0.00217646	0.00249516	0	0.00216841	0.00227227	0.00178913	0	0	0.00267294	0	0	0.00137069	0	0.000728319	0	0.000624395	0.0016792	0	0.000781158	0.00180809	0	0.00035988	0	0.0233059	0	0.00484952	0	0
1700036A12Rik	0	0	0.00879657	0	0	0	0	0		0	0	0.00202632	0	0	0	0	0	0	0	0	0.00247771	0	0.000638537	0	0	0.000180794	0	0	0.000738087	0	0	0	0.000200993	0	0	0.0012506	0	0	0.000332408	0	0	0	0	0.000479064	0
1700037C18Rik	0.0881775	0.129864	0.125941	0	0.0870218	0	0	0.0929081		0.0569856	0.0575231	0.0825111	0	0.037019	0.0592831	0.0369967	0.0322951	0.0366003	0.0421776	0.0151021	0.032115	0.0531499	0.0344664	0.0882012	0.0403057	0.0236236	0	0.0231075	0.0460129	0.0517488	0.0463062	0	0.0368127	0.0280792	0.0373802	0.0361938	0.0380442	0.0500364	0.0392745	0.0453173	0	0.0713418	0.0346483	0.0446693	0
1700037H04Rik	0.143594	0.17962	0.254064	0	0.18021	0.192086	0	0.116475		0.127808	0.168052	0.266063	0.0722439	0.166897	0.0936762	0.150938	0.200602	0.236945	0.20072	0.0791714	0.189862	0.174927	0.144952	0.20457	0.147388	0.114207	0.0680828	0.169025	0.1754	0.0911995	0.132026	0.0415431	0.122482	0.142411	0.195629	0.18198	0.140295	0.34975	0.144477	0.463099	0.500805	0.393385	0.257582	0.220794	0
1700040L08Rik	0	0	0	0	0.000633167	0	0	0		0	0	0	0	0	0	0	0.000391513	0	0	0.00389287	0.00191233	0	0.00067801	0	0	0.00117229	0	0	0.000284449	0	0	0	0.000169592	0	0	0.000346653	0	0	0.000956765	0	0	0	0	0	0
1700041G16Rik	0	0.0354836	0	0	0.00398645	0	0	0.00164176		0.00229396	0.00565927	0.00707622	0	0.00301293	0	0.00218428	0.00420473	0.00326556	0.00190291	0.00149743	0.00262569	0.0028312	0.00339323	0	0.0263746	0.0041377	0	0	0.00765944	0.00843164	0.00662075	0	0.0091674	0.00567179	0.00453836	0.00806671	0.00788249	0.0562189	0.00531754	0	0	0.0164236	0	0.00717059	0
1700042O10Rik	0	0	0	0.256519	0.00289843	0	0	0		0.0105517	0.00993996	0	0.0644695	0.00194254	0	0.00601681	0.00301672	0.00143701	0.00442396	0	0.000589067	0.00693941	0.00139694	0	0	0.000839571	0	0	0.0010257	0	0.00167762	0	0.000926498	0.00304323	0.00374052	0.000849804	0.0025546	0	0.000640677	0	0	0	0.00458641	0.00243687	0
1700045H11Rik	0	0	0	0	0	0	0	0		0	0	0	0	0	0	0	0.000304594	0	0	0	0	0	0.000215941	0	0	0.000635161	0	0	0.000216447	0	0	0	0	0	0	0	0	0	0	0	0	0	0	0	0
1700047I17Rik2	0	0	0	0	0.00164857	0	0	0		0.00427285	0.00109111	0	0	0.00393565	0	0.00340459	0.008044	0.00384195	0.000755447	0	0.00242698	0.00685807	0.00330589	0	0	0.00547137	0	0	0.00361825	0.00986255	0.00490715	0.0593867	0.00600265	0.00544539	0.00271435	0.00599268	0.0072016	0	0.00632442	0	0	0	0	0.00414272	0
1700047M11Rik	0	0	0.00217805	0	0.00164254	0	0	0.001423		0.00043651	0	0.059892	0	0.00252567	0	0.000271121	0.000134868	0.0195346	0	0	0.00531772	0	0.000861797	0.0319922	0	0.00129866	0	0	0.0274652	0.071001	0.021098	0	0.0416716	0.0357732	0.00273131	0.0675692	0.0172132	0	0.042439	0	0	0.0324002	0	0.00285724	0
1700048O20Rik	0.0168806	0	0	0	0.0367524	0	0	0.0279295		0.0185306	0.015532	0.0235741	0	0.0131418	0	0.0244401	0.020011	0.0277966	0.0135896	0.0124461	0.0337756	0.0227029	0.0175131	0	0.00765785	0.0158776	0.0659309	0.0749538	0.0181489	0.00944278	0.0159179	0	0.0156748	0.0130217	0.0298846	0.0260614	0.0203155	0.0468744	0.0265859	0	0.0212168	0.0961583	0.0232483	0.0219944	0
1700052H01Rik	0	0	0	0	0	0	0	0		0.000278833	0.00408361	0.00224844	0	0	0	0.000262912	0.000296008	0.00304786	0	0.00757676	0	0.000475492	0.000121257	0	0	0.00039356	0	0.00882457	0.000580993	0.0107516	0	0	0.00205167	0.00270495	0	0.00241866	0.00074661	0.0243202	0.0016948	0	0	0	0	0.0014804	0
1700052K11Rik	0.0875308	0.209828	0.066941	0.154816	0.0437292	0.192086	0	0.0487781		0.0591839	0.0448187	0.0581348	0.210053	0.0497833	0.109069	0.0728344	0.0754637	0.0677812	0.0690131	0.0543491	0.083273	0.0943632	0.0916743	0.0319922	0.133405	0.0815519	0.0945108	0.0245182	0.0651343	0.0909389	0.0708633	0	0.072173	0.0542907	0.0442521	0.0550601	0.0498716	0.0414131	0.0559289	0.0987527	0.0963173	0.0425278	0.0743374	0.070802	0
1700055D18Rik	0.00278064	0	0.0407255	0.0489541	0.00847442	0	0	0		0.00414061	0.00517313	0.00623558	0	0.00352586	0	0.00416807	0.0117369	0.00112845	0.00194255	0	0.004289	0.00300348	0.00574319	0	0.00814001	0.0056081	0.0632511	0	0.00658987	0	0.00130624	0	0.00460446	0.00370087	0.0131903	0.00693053	0.00644478	0	0.00841713	0.0215731	0.0165886	0.0126224	0	0.00466508	0
1700056E22Rik	0.00637531	0	0.0105134	0	0.0162528	0	0	0.00581244		0.0129088	0.0178968	0.00914568	0	0.0266039	0.0555775	0.0184145	0.017331	0.0167596	0.0198609	0.0201263	0.0185219	0.0252999	0.0283265	0.036907	0.0254763	0.0212679	0.0680828	0.0380561	0.0188541	0.0235444	0.0129724	0.0224325	0.0100002	0.0134348	0.00978665	0.0137128	0.0250361	0	0.0134142	0.0197671	0.0248419	0.0428002	0	0.0122981	0
1700056N10Rik	0.00497156	0	0.0161293	0	0.0071913	0	0	0.00960943		0.00361019	0.00195139	0.00464892	0	0.00633141	0	0.00472188	0.00244696	0.00730401	0.00200002	0	0.00803308	0.00538888	0.0044997	0	0.0274513	0.00408483	0	0	0.00353091	0.0113767	0.00208104	0	0.00428619	0.00324119	0.00183228	0.00305819	0.00556543	0	0.00613047	0	0	0.00920078	0	0.00691804	0
1700057G04Rik	0	0	0	0	0	0	0	0		0.00112429	0.00169487	0	0	0.000380344	0	0.00357147	0.00331361	0	0.00186521	0	0	0.00326928	0.00181786	0	0.019647	0.00305409	0	0	0.000997569	0	0.000735151	0	0	0.000684343	0	0	0.00134996	0	0	0	0.018148	0	0	0.0026278	0
1700058P15Rik	0	0	0	0	0.00353708	0	0	0		0	0	0.0184284	0	0	0	0.000467779	0.00110534	0	0	0	0.0053372	0.000780775	0.00388851	0	0	0.00104123	0	0.0150141	0.00116574	0	0.00161456	0	0.00219787	0.00123006	0	0.00155179	0.00105995	0	0.00300154	0	0	0	0	0.00167134	0
1700060C20Rik	0	0	0	0	0	0	0	0		0	0	0	0	0	0	0	0	0	0	0	0.00153938	0	0.000159245	0	0	0.000858352	0	0	0.00111064	0	0	0	0.00068027	0	0	0.00035414	0	0	0.000628972	0	0	0	0	0.000673195	0
1700061G19Rik	0.0083758	0.0957387	0	0.137439	0.0195993	0.192086	0	0.013722		0.00959839	0.00597314	0.00523419	0	0.0275408	0	0.0174504	0.0267946	0.0701622	0.0204217	0.0341448	0.0367847	0.0216371	0.0378639	0	0.0184639	0.0338575	0	0.0133987	0.0163217	0	0.00780237	0	0.00419493	0.0260004	0.0179475	0.00561398	0.00469108	0	0.00259112	0	0.0313571	0.0150938	0	0.0285201	0
1700061I17Rik	0	0	0	0	0	0	0	0		0	0.000762698	0	0	0	0	0	0	0	0	0	0	0	0.000487933	0	0	0.00037207	0	0	0.000115631	0	0	0	0	0	0	0	0	0	0	0	0	0	0	0	0
1700063D05Rik	0.00530439	0	0	0	0.00211911	0	0	0		0.00133372	0.00112895	0	0	0	0	0.000406947	0	0	0	0	0	0	0.000855787	0	0	0.000195886	0	0	0.000559	0	0.00154548	0	0	0	0	0	0	0	0	0.0197973	0	0	0	0.00118605	0
1700064H15Rik	0	0	0	0	0	0	0	0		0	0	0	0	0.00186773	0	0	0.00112157	0	0	0	0	0	0.000142659	0	0	0.000337556	0	0	0.000230713	0	0	0	0	0	0	0	0	0	0	0	0	0	0	0	0
1700064M15Rik	0	0	0	0	0.00123532	0	0	0.00162679		0.00259903	0.00076557	0	0	0.00271974	0	0.00163193	0.000844105	0.00292919	0	0	0.00177752	0.00200542	0.00181536	0	0	0.00420489	0	0	0.00210367	0	0.00178195	0.020005	0.00171459	0.00536444	0.00260397	0.00120089	0	0	0.00119305	0	0	0	0	0.00158196	0
1700065D16Rik	0	0	0	0	0	0	0	0		0	0	0	0	0	0	0	0.000191735	0	0	0	0	0	0.00041143	0	0	0.000456231	0	0	0.000591635	0	0	0	0	0	0	0	0	0	0	0	0	0	0	0	0
1700065J11Rik	0	0	0	0	0.00496627	0	0	0.00804309		0	0	0	0	0.000465698	0	0	0.000340945	0	0	0.0084207	0	0	0.00119783	0	0	0.000328808	0	0	0.00043434	0	0	0	0	0	0	0	0	0	0	0	0	0	0	0	0
1700066B19Rik	0.0175798	0	0.00324141	0	0.00699073	0	0	0.0182179		0.0112504	0.00390695	0.00497463	0	0.00874033	0	0.00681188	0.00629217	0.00705754	0.00438038	0.00234754	0.00134442	0.00323741	0.00428563	0	0.0103239	0.00525344	0	0	0.00666581	0	0.00118773	0	0.00436898	0.00593596	0.0147751	0.00340207	0.00606937	0	0.0028055	0	0.011108	0	0.00523738	0.00329863	0
1700066M21Rik	0.0325158	0.0262885	0.0593529	0	0.059424	0	0	0.0300681		0.0322056	0.0381368	0.0287193	0.201817	0.0289201	0.0429415	0.0486901	0.0553967	0.039835	0.0242043	0.0126333	0.0421657	0.0310937	0.0319323	0	0.0341455	0.0337446	0	0.0060885	0.0301608	0.021668	0.0270826	0.0195937	0.0269659	0.0373238	0.0167644	0.0295745	0.0464654	0.0407615	0.0358775	0.14702	0.139135	0.138977	0.120751	0.0941608	0
1700067K01Rik	0	0	0	0	0.000535402	0	0	0		0.000655602	0	0	0	0.0016778	0	0.000714673	0.000899472	0	0.00200688	0.0113081	0	0.000330615	0.000945033	0	0.0119902	6.97464e-05	0	0	0.00100959	0	0	0	0	0	0.00339046	0	0	0	0	0	0	0	0	0.00201302	0
1700069B07Rik	0.00136516	0	0	0	0.00105247	0	0	0		0.000624538	0	0	0	0.000776401	0	0.000503941	0.000369058	0	0	0	0	0	0.000630364	0	0	0.00065293	0	0.00669936	0.000476854	0	0	0	0	0	0	0	0	0	0	0	0	0	0	0.00217859	0
1700080O16Rik	0.0578107	0	0	0	0	0	0	0		0.00063978	0	0	0	0	0	0	0	0	0	0	0	0	0	0	0	0	0	0	0	0	0.000320448	0	0	0	0	0	0.000781887	0	0	0	0	0	0	0	0
1700084C06Rik	0.00466084	0	0.00775361	0	0.00219955	0	0	0.00560528		0.00222506	0.00120316	0	0	0.00066783	0	0.00135946	0	0	0.00094142	0.000824979	0.00130605	0.000790918	0.000927426	0	0	0.000396429	0	0	0.000646584	0	0	0	0.00177775	0	0	0.00040396	0	0	0	0	0	0	0	0.000797868	0
1700084E18Rik	0.00503303	0	0.00837823	0	0.00562165	0	0	0.0201189		0.00915449	0.00215772	0.00328219	0	0.00920637	0	0.00649838	0.010121	0.00774404	0.0244911	0.00696066	0.0151628	0.0069758	0.0151859	0	0.0156406	0.0147689	0	0.0313716	0.0111376	0.0116027	0.00620734	0	0.00718373	0.00590139	0.0200979	0.00569939	0.00446966	0.0210688	0.00830406	0.03202	0	0.00949689	0.00763794	0.0112863	0
1700086O06Rik	0.0494783	0.0151676	0.0283095	0	0.0386458	0	0	0.0263519		0.0369389	0.0223432	0.0730657	0	0.0287307	0.0867656	0.0413062	0.0309962	0.08329	0.0319102	0.00941149	0.0359142	0.026266	0.0415764	0.0748049	0.0597902	0.044631	0	0.0671699	0.0320481	0.0355025	0.0405749	0	0.0255492	0.031684	0.022779	0.019926	0.0315367	0.0258582	0.0244903	0.0969416	0.101519	0.100739	0.0473655	0.0765651	0
1700086P04Rik	0.00148351	0	0.00378053	0	0.00595525	0	0	0.00379091		0.00491564	0.00407028	0	0	0.00313009	0	0.00153287	0.00319578	0	0.00155585	0	0.0055519	0.00391166	0.00268173	0	0.0121206	0.00131688	0	0	0.00272276	0	0.00284676	0	0.000188889	0.000287741	0	0.00141129	0.00288648	0.018953	0.000518627	0	0	0	0	0.000518003	0
1700088E04Rik	0.0853242	0.0471378	0.100587	0.111394	0.0799247	0	0	0.096362		0.0482565	0.0143265	0.0220421	0	0.0391105	0	0.0221822	0.0200964	0.0285122	0.0252418	0.0140572	0.0353572	0.0324696	0.0262905	0.0688993	0.033375	0.0277502	0.0991631	0.0249775	0.0363061	0.0273242	0.063148	0.0293801	0.0573159	0.0482059	0.017607	0.0460165	0.0324017	0	0.0376829	0.0197153	0	0.012917	0.0154006	0.00898873	0
1700092M07Rik	0.00119473	0	0	0	0	0	0	0		0.00085668	0	0	0	0	0	0.00139381	0.000380291	0	0	0	0	0.00228939	0.000391613	0	0	0.000300063	0	0	0.00023086	0	0	0	0	0.00108058	0	0	0	0	0	0	0	0	0	0.000696162	0
1700093K21Rik	0	0	0	0	0	0	0	0		0	0	0	0	0.00152056	0	0	0	0	0	0	0	0	0.000272459	0	0	0	0	0	0.00123273	0	0	0	0	0	0.00103525	0	0	0	0	0	0	0	0	0	0
1700095J03Rik	0	0	0	0	0	0	0	0.00276041		0	0.00572484	0	0	0.00183247	0	0.00316561	0.00230004	0.00168014	0.00893718	0	0.00207825	0.00161321	0.00406002	0	0	0.00385494	0	0.00927334	0.00432383	0	0.00205129	0	0.00520526	0.0030698	0.00224958	0.00528701	0.00304295	0	0.00645232	0.039988	0	0.0140254	0	0.00479682	0
1700096K18Rik	0.0643218	0.0275956	0.133436	0.0624395	0.0715391	0	0	0.0368101		0.0632943	0.034965	0.067293	0.254289	0.0884832	0	0.0488598	0.0290461	0.126942	0.0848682	0.0168455	0.0813355	0.0536264	0.0626845	0.0609085	0.200121	0.0806131	0.129182	0.125628	0.100418	0.157451	0.135635	0.194908	0.112298	0.133188	0.05167	0.104819	0.102617	0.0616204	0.0989363	0	0.0152835	0.0409047	0.0418837	0.0505031	0
1700097N02Rik	0.00301444	0	0	0	0.00037508	0	0	0		0.0006967	0	0	0	0	0	0.000540638	0.000375639	0	0	0	0	0	0.000704857	0	0.0123087	8.90345e-05	0	0	0	0	0	0	0	0.000287741	0	0	0	0	0	0	0	0	0	0.00599347	0
1700102H20Rik	0.0157921	0	0.00620312	0	0.00604696	0	0	0.00716886		0.0120094	0.0121965	0.00578729	0	0.00290133	0	0.011755	0.00460127	0.00161541	0.00506105	0	0.00127879	0.00688951	0.00320794	0	0.0179187	0.00589963	0	0	0.00306667	0	0.00280365	0	0.00133677	0.00322843	0.0114181	0.000962172	0.00338954	0	0.00222381	0.0542719	0	0.01413	0.0238659	0.0210284	0
1700102P08Rik	0	0	0	0	0.00259168	0	0	0		0.00124851	0.00118995	0.0141472	0.0525547	0.000573655	0	0.00101556	0.00309508	0	0.0014747	0.00769231	0.00152496	0.00158624	0.00162744	0	0	0.00162068	0	0	0.00127313	0.00749951	0.000838634	0	0.00139985	0.000705656	0.0127918	0.00125989	0.0010551	0	0.0010834	0	0	0.00512215	0	0.00139032	0
1700104B16Rik	0.00668996	0	0	0	0.00127587	0	0	0		0.00126796	0	0	0	0	0	0.000189987	0.000877296	0	0	0	0	0.000368867	0.00066631	0	0	0.00032518	0	0	0.00023836	0	0	0	0	0	0	0	0.001862	0	0	0	0	0	0	0	0
1700105P06Rik	0.00173298	0	0	0	0.00353165	0	0	0		0.00155521	0.00128819	0.0068122	0	0.0025488	0	0.00209293	0.00378051	0	0	0.0119958	0.00423704	0.00136156	0.00457539	0.0310477	0	0.00474622	0	0	0.00620292	0.00801765	0.000666324	0	0.00363734	0.00210295	0.00495495	0.00445418	0.00333812	0	0.00228359	0.0187427	0.0165886	0.0101919	0	0.000643049	0
1700109H08Rik	0	0	0.0254202	0	0.00314097	0	0	0.00578692		0.00396156	0.00358898	0.00186703	0	0.0029815	0	0.00323535	0.00367022	0	0.00359908	0	0.00967089	0.0025554	0.00537623	0	0	0.00489453	0.0865179	0	0.00499756	0.0118668	0.00347759	0	0.00591968	0.00174966	0.00429753	0.00472329	0.0028367	0	0.00981931	0.0244388	0	0	0	0.0023672	0
1700112D23Rik	0	0	0.00622333	0	0.0144708	0	0	0.001945		0.00368449	0	0.00175685	0	0	0	0.00108978	0.000574	0	0.00390034	0	0.00199472	0.000415614	0.00142523	0	0	0.000971876	0	0	0.00138283	0	0.0115617	0	0.00424295	0.00416185	0	0.00375135	0.00120841	0	0.00302469	0	0	0	0	0	0
1700112J16Rik	0.00301444	0	0	0	0.00193176	0	0	0.00163738		0.000823956	0	0.00221981	0	0.00422019	0	0.000857312	0.00183211	0	0	0	0.000859165	0	0.00139654	0	0.00819158	0.000934303	0	0	0.00124518	0	0.00634513	0	0.000975216	0.00155586	0.00164079	0.00110362	0.00434647	0	0.0019704	0	0	0	0	0.00234539	0
1700113A16Rik	0.0217053	0	0.0276222	0	0.0191125	0	0	0.0216541		0.0130393	0.000909736	0.0515223	0	0.0207106	0.030612	0.013161	0.0208412	0.0567627	0.0395854	0.0184088	0.0553438	0.0143251	0.0381391	0.0616919	0.0660684	0.050787	0.0632511	0.041161	0.0370339	0.057466	0.0828839	0	0.0688882	0.0307349	0.0199067	0.0384065	0.0374027	0.0228365	0.0557448	0	0	0.0164236	0.0277544	0.0362021	0.194382
1700119H24Rik	0	0	0	0	0	0	0	0		0	0	0	0	0	0	0	0	0	0	0	0	0	0.000447482	0	0	0.000491927	0	0	0	0	0	0	0	0	0	0	0	0	0	0	0	0	0	0.000403019	0
1700123L14Rik	0	0	0	0	0	0	0	0		0	0.00472833	0	0	0.000464359	0	0.000904914	0	0	0	0	0	0	0.000980649	0	0	0.000785215	0	0	0.000741282	0	0.00204378	0	0.00170922	0.000462004	0	0.0008487	0.00138195	0	0.000781063	0	0	0	0	0.00173316	0
1700123O20Rik	0.875002	0.656788	0.607075	0.777242	0.708531	1.03689	0.703878	0.605492		0.927309	0.454951	0.595242	0.504348	0.580343	0.339922	0.850341	0.668944	0.722644	0.700242	0.418879	0.530215	0.80297	0.594607	0.582301	1.05196	0.845142	0.740746	0.660825	0.708676	0.543309	0.831372	0.314511	0.56769	0.897075	0.654503	0.614592	0.839399	0.667455	0.603074	0.635087	0.682668	0.597194	0.816477	0.745037	0.553449
1700124L16Rik	0	0	0	0	0.000876535	0	0	0.00265596		0.00323192	0.00229636	0	0	0.00467297	0	0.00204974	0.0040168	0.00180136	0.00615597	0	0.000820524	0.00158376	0.00186624	0	0	0.00142262	0	0	0.0020028	0	0.00289117	0	0.000569551	0	0	0.000988011	0.000764397	0	0.00134472	0	0	0	0	0.00204725	0
1700125H20Rik	0	0	0	0	0.0015801	0	0	0		0.00120284	0	0.00935174	0	0	0	0.00102798	0.00159796	0	0.00131071	0	0.000590705	0	0.00136829	0	0	0.00118965	0	0	0.000789596	0	0.00245484	0	0.000705076	0	0	0.00116986	0	0	0.000508644	0	0	0	0	0.00350465	0
1700128A07Rik	0	0	0	0	0.000310231	0	0	0		0	0	0	0	0	0	0	0	0.00159965	0	0	0	0	0.000114631	0	0	0.000340523	0	0	0.000367851	0	0	0	0.000164279	0	0	0.000975932	0	0	0.000951502	0	0	0	0	0.0031915	0
1810008I18Rik	0	0	0	0	0	0	0	0		8.8197e-05	0	0.0133074	0	0	0	0.000201527	0.000646207	0.0244105	0	0	0.00212538	0	0.000443932	0.0180553	0	0.000382988	0	0	0.00685268	0	0	0	0.0031589	0.0090827	0.0063151	0.0118571	0.00457515	0	0.00959785	0	0	0	0	0.000326343	0
1810009A15Rik	0.0368776	0.0674371	0.0664314	0	0.0441769	0	0	0.0476302		0.0330812	0.0410564	0.0204452	0.0525547	0.0486704	0	0.0320373	0.0465366	0.041785	0.0349902	0.00246596	0.0418963	0.0344239	0.0343839	0	0.023164	0.0333126	0.221725	0.0368561	0.0459116	0.0115003	0.0359881	0	0.0295147	0.0289368	0.0246271	0.0311881	0.0490217	0.0179355	0.0391247	0.0402224	0.0529998	0.0365005	0.0348798	0.0454948	0
1810010D01Rik	0	0	0	0	0.000614973	0	0	0		0.000284814	0	0	0	0	0	4.91663e-05	0.000250037	0	0.00361085	0.0147292	0.00268828	0.00135391	0.00274179	0	0	0.00135393	0	0	0.00182817	0	0.00460917	0	0.00147221	0.000407424	0	0.000476873	0	0	0.00161652	0	0	0	0	0	0
1810010H24Rik	0.0259958	0	0.0325325	0	0.0168078	0	0	0.0155522		0.0171611	0.0118192	0.0585575	0	0.0308018	0.0936762	0.0117354	0.0124035	0.0118306	0.00843523	0.036023	0.0168978	0.0211744	0.0190597	0	0.0240663	0.0193393	0	0.0646703	0.0450225	0.125411	0.0683123	0.088768	0.112791	0.0344672	0.0244308	0.0384249	0.0588597	0.00591453	0.0470059	0.0225665	0	0.0225123	0.0294943	0.00966598	0
1810011H11Rik	0	0	0	0	0.000304468	0	0	0		0	0	0	0	0.0024125	0	0	0.00048298	0	0	0.000986509	0.00306671	0	0.000917694	0	0	0.000692998	0	0	0.00109889	0	0	0	0.000807965	0	0	0.000580707	0	0	0.00287785	0	0	0.0102443	0	0.00125589	0
1810012K16Rik	0	0	0	0	0.00111415	0	0	0.00356711		0.000977732	0	0.00182888	0	0.000761946	0	0.00102485	0.00110454	0	0.00252468	0	0.00546872	0.00204894	0.00144348	0	0	0.00227582	0	0	0.0004389	0	0	0	0	0.000905816	0	0.00085557	0	0	0.000802439	0	0	0	0	0	0
1810013L24Rik	0.211083	0.14681	0.335901	0.188463	0.209495	0	1.40776	0.211893		0.154484	0.113787	0.253132	0.136713	0.196862	0.264414	0.172914	0.179114	0.317144	0.175339	0.227247	0.192095	0.162392	0.196412	0.295916	0.224724	0.166124	0	0.260186	0.20845	0.260994	0.148192	0.144626	0.182971	0.174718	0.224203	0.18588	0.171349	0.144919	0.197904	0.0985311	0.186644	0.161891	0.224639	0.167006	0.221361
1810019N24Rik	0.00423829	0	0	0	0.0019331	0	0	0.00814495		0.0024344	0	0.00135725	0	0	0	0.00249926	0.00213595	0.0047331	0	0	0.00347619	0.00416526	0.00360011	0	0.0187002	0.00197368	0	0	0.00479827	0	0.00115253	0	0.00424949	0.00714706	0.00716469	0.00515527	0.00475561	0.0281122	0.00305604	0	0.011108	0.0064146	0	0.00309458	0
1810021B22Rik	0.0380621	0.0466744	0.0749185	0	0.043537	0	0	0.0383755		0.0379928	0.0194813	0.0235457	0.193409	0.0462207	0	0.0198983	0.020079	0.0349125	0.0397252	0.0437695	0.0635435	0.0290996	0.0418214	0.0227003	0.0278489	0.038128	0	0.0415628	0.0288748	0.0188356	0.0483156	0	0.0327973	0.0256413	0.0187965	0.0308785	0.0340244	0	0.0270835	0	0.0202491	0.0104596	0.0104741	0.0162689	0
1810022K09Rik	1.35557	0.82652	1.32787	1.70515	1.13993	0.537716	1.40776	0.947617		1.56491	0.954022	1.20901	1.66093	0.880705	0.920285	1.52468	1.05694	1.71714	1.25666	0.678361	1.11327	1.34493	1.06562	1.06105	1.84928	1.55052	0.957718	1.76599	1.11653	1.06148	1.34935	0.74874	1.20412	1.35418	0.997126	1.29637	1.35949	1.21017	1.04983	1.29818	1.10865	0.983733	1.50154	1.33762	1.42276
1810024B03Rik	0.0690662	0.0479596	0.12951	0.0624395	0.0930516	0.192086	0	0.0983716		0.0806606	0.0767248	0.162775	0.201183	0.106488	0	0.0880288	0.0814058	0.0571331	0.140253	0.0896656	0.120903	0.0878073	0.124336	0.0632172	0.198704	0.154328	0.195252	0.231211	0.111775	0.0943966	0.145714	0.084607	0.0894315	0.102158	0.102921	0.0838749	0.146652	0.105195	0.0942425	0.133232	0.0565638	0.0612076	0.0351873	0.0942594	0
1810030O07Rik	0.208082	0.15104	0.152071	0.0606767	0.234877	0	0.703878	0.192633		0.229388	0.171191	0.236704	0.169579	0.216907	0.184441	0.182292	0.184853	0.244757	0.138442	0.307076	0.182096	0.174362	0.158775	0.274621	0.102504	0.156888	0.233132	0.206484	0.187184	0.196925	0.199453	0.156634	0.22301	0.192053	0.138295	0.203587	0.216711	0.164785	0.206868	0.154904	0.0843763	0.110712	0.0703648	0.12162	0
1810032O08Rik	0.0608852	0.0516097	0.0373194	0	0.0391695	0	0	0.0413097		0.0404132	0.0798787	0.166875	0	0.0707998	0.0685453	0.0542542	0.0782886	0.094301	0.0497378	0.100461	0.0617212	0.044886	0.0661585	0.0664407	0.0348539	0.0434823	0	0.0771328	0.0661489	0.068143	0.0327536	0.0498704	0.0619754	0.0356232	0.0576067	0.0537123	0.0466529	0.14857	0.0747376	0.0551104	0.0439724	0.0308415	0.0550614	0.0454729	0
1810034E14Rik	0.0340177	0	0	0	0.0307875	0	0	0.02946		0.0321608	0.016699	0.0388056	0	0.042991	0.0380987	0.0262121	0.0282728	0.060676	0.017992	0.00189279	0.0301565	0.0312113	0.0361924	0.0374025	0.0137424	0.0291743	0	0.0409015	0.0376418	0.00796081	0.0365414	0	0.0402998	0.0506894	0.0336608	0.0615538	0.0339667	0	0.0430068	0	0	0.0350224	0.0106533	0.0128746	0
1810037I17Rik	6.59128	4.41315	4.53618	6.67004	4.04618	1.30606	7.74266	4.99671		5.5217	2.75886	2.45535	3.18684	2.19439	1.46307	3.57353	2.26257	2.05682	2.18238	0.976761	1.5689	2.1318	1.70878	1.53003	2.5071	2.4861	1.89251	3.54152	2.0382	2.02457	2.60858	2.62761	1.86486	2.93404	2.25373	2.08432	2.69575	1.1771	1.86596	4.16639	3.15119	3.48094	5.60638	3.48741	4.91354
1810041H14Rik	0.00358181	0	0.0869014	0.0606767	0.00609783	0	0	0.0071966		0.0100987	0.00448997	0.00966639	0.0644695	0.00555947	0	0.00418861	0.00514621	0.0021862	0.0071214	0	0.00229697	0.00591409	0.00400948	0	0	0.00391382	0	0	0.00575487	0	0.00245295	0	0.00156832	0.00237818	0.00137167	0.00233017	0.00197804	0	0.00167156	0	0	0	0	0.00999924	0
1810041L15Rik	0.0718919	0.0703431	0.333131	0	0.0407762	0.192086	0.703878	0.164345		0.01658	0.0161851	0	0	0.00842067	0	0.000551533	0.000259342	0.00385255	0.00454736	0	0.00134628	0.000385853	0.000275669	0	0	0.000191167	0	0.0249775	0.00599083	0	0.00351835	0	0.0118463	0.00211522	0.00192622	0.00132759	0.00200274	0	0.0023855	0	0	0	0	0.000592723	0
1810043G02Rik	0.235871	0.146057	0.267015	0.265829	0.244433	0.192086	0	0.282971		0.204873	0.137053	0.239707	0.222134	0.225273	0.128834	0.169628	0.178452	0.210181	0.20039	0.0941638	0.233925	0.203775	0.185101	0.317419	0.129477	0.169664	0.448251	0.200293	0.21644	0.286042	0.183495	0.467964	0.23503	0.221756	0.166617	0.237047	0.189898	0.228287	0.243851	0.145281	0.0436142	0.154671	0.12001	0.143027	0
1810044D09Rik	0.0316549	0.0188421	0.050593	0	0.0576139	0	0	0.0536505		0.0343858	0.00688259	0.00811841	0.0722439	0.0321806	0	0.0155012	0.0148053	0.00282046	0.0238375	0.00625312	0.017627	0.0261867	0.0278979	0	0.0219482	0.0170599	0	0	0.0148519	0.0159785	0.0114001	0	0.0144052	0.0109126	0.0200356	0.00983428	0.0104895	0	0.0135287	0.0173507	0.0294905	0.015784	0.0108817	0.0225932	0.226783
1810055G02Rik	0.405248	0.411373	0.242022	0.514477	0.316308	0.314347	0	0.292829		0.376238	0.371506	0.299798	0.427189	0.360426	0.115533	0.524248	0.621409	0.478304	0.509436	0.452222	0.490207	0.540042	0.5031	0.35278	0.468128	0.585331	0.628117	0.516978	0.51106	0.400902	0.326511	0.33751	0.35743	0.498485	0.569489	0.433971	0.463814	0.448356	0.420654	0.519673	0.634473	0.624812	0.752185	0.7137	0.580428
1810058I24Rik	3.88805	3.60503	2.38604	3.04073	3.22192	1.35124	3.51939	3.66013		3.14363	1.82189	1.88199	3.37948	3.14542	2.25727	2.6306	2.27199	2.14003	3.48811	1.82579	3.51556	2.78125	3.7466	2.13332	3.07001	3.92689	3.75648	2.70444	2.29073	1.8171	3.14228	2.56567	1.63304	2.54274	2.33134	1.74233	2.25493	2.00309	1.62555	1.31944	1.47439	1.65014	2.03103	2.21783	0.885445
1810062G17Rik	0.0298886	0.0689949	0.0103758	0	0.0443593	0	0	0.0358655		0.032085	0.018506	0.0779089	0	0.0420923	0	0.0436943	0.0736066	0.0281251	0.0474629	0.045475	0.0368396	0.0432979	0.0506347	0.0747357	0.0495142	0.0454891	0.0680828	0.00805594	0.0449857	0.0209671	0.0505771	0.0750307	0.0522215	0.0248033	0.0217487	0.037099	0.036588	0.0530062	0.0542113	0	0.0242881	0.0199448	0.0346521	0.048561	0.503651
1810062O18Rik	0.014397	0	0.00685038	0.0624395	0.0103585	0	0	0.0175282		0.00701923	0.00656466	0.0179302	0	0.0232636	0	0.00664566	0.019384	0.0390767	0.0230263	0.0710205	0.0237843	0.0143444	0.0214873	0.0271084	0.0202873	0.02418	0.0680828	0.0060885	0.0157648	0.00956779	0.0125218	0	0.0185224	0.0192067	0.0221287	0.0224906	0.0196801	0.0298576	0.0184831	0	0	0	0.0273003	0.0142916	0
1810063I02Rik	0	0	0	0	0.00374082	0	0	0.00676361		0	0	0	0	0	0	0	0	0	0	0	0	0	0.00020529	0	0	0.000132975	0	0	0	0	0	0	0	0	0	0	0	0	0	0	0	0	0	0	0
1810065E05Rik	0	0.0151676	0	0	0.00267928	0	0	0		0.00165107	0.00336495	0	0	0.000798959	0	0.000935801	0.000212722	0.00217646	0.00147128	0.00328626	0.000416327	0.000783179	0.00117754	0	0	0.000870292	0	0	0.000942948	0	0.00196106	0	0.00060606	0.00339291	0.00188639	0.00106593	0.00251704	0	0.000447545	0	0	0	0	0	0
2010005H15Rik	0.0701276	0.0215692	0.0631922	0.0606767	0.0110817	0	0	0.0523988		0.0109388	0.00458782	0	0	0.00125408	0	0.00153312	0	0	0	0	0.000743338	0	0.000468438	0	0	0	0	0	0.00060121	0	0.00225515	0	0.000978682	0	0	0	0	0	0.00018715	0	0	0	0	0.00311276	0
2010007H06Rik	0.0365212	0	0.0907613	0.0690217	0.0259604	0	0	0.0271788		0.00985947	0.014654	0.039986	0	0.0151555	0	0.00474293	0.00586481	0.00730124	0.0219721	0.0407992	0.0189121	0.00989475	0.0214645	0	0	0.0218713	0	0.00927334	0.0328562	0.0261963	0.0347398	0	0.0349752	0.0319341	0.031129	0.0325418	0.0308046	0.0518454	0.0277385	0.0463371	0.0157754	0.012299	0	0.0110189	0
2010009K17Rik	0	0	0	0	0.000502424	0	0	0		0	0	0	0	0	0	0	0	0	0	0	0	0	0.000989249	0	0	0.00160934	0	0	0.000331288	0	0	0	0	0	0	0	0	0	0	0	0	0	0	0.00032733	0
2010013B24Rik	0	0	0	0	0	0	0	0		0	0	0	0	0	0	0	0.000614756	0	0	0	0	0	0.000546825	0	0	0.000366917	0	0	0.00069245	0	0	0	0	0	0	0	0	0	0	0	0	0	0	0.000760711	0
2010015M23Rik	0.00815873	0	0.00614775	0	0.00367364	0	0	0.01507		0.00744133	0.010068	0.0052263	0	0.00728561	0	0.00543289	0.0191606	0	0.00748173	0	0.00835217	0.006435	0.00568862	0.0271084	0	0.007465	0	0	0.0105197	0.00408648	0.00131049	0	0.00671196	0.00662479	0.00847054	0.00803499	0.00762415	0.0250786	0.00588069	0	0	0.00795499	0	0.0254389	0
2010107E04Rik	4.18158	4.56155	3.52276	4.46148	4.39875	4.17965	4.22327	4.09878		5.26582	3.92421	4.34794	6.15613	4.99528	5.90054	5.87571	5.42845	4.87874	4.14674	2.56691	4.38682	5.20338	5.0238	5.22529	5.37367	4.50135	5.68291	5.92266	4.76888	4.61652	3.67944	3.43618	3.07446	4.60217	4.56711	3.72327	4.15931	3.645	3.87939	4.64467	4.68712	5.29121	5.19673	5.47816	9.05474
2010109A12Rik	0.00238409	0.0216064	0.0103758	0	0.00872639	0	0	0.00552772		0.00841684	0.00440258	0.00368161	0	0.0123379	0	0.00863572	0.00609685	0.00732309	0.0093663	0	0.00942724	0.00730268	0.00795456	0.0559914	0.00933363	0.00810157	0	0	0.0124281	0.0187882	0.00883991	0	0.0181419	0.00534464	0.0126299	0.0143253	0.00710774	0	0.0134376	0.0358038	0	0	0.0138649	0.00556514	0
2010109I03Rik	0	0.0216064	0	0	0.00724315	0	0	0.0032004		0	0	0	0	0.000567056	0	0	0	0	0	0	0	0	0.000444495	0	0	0	0	0	0.0004329	0	0	0	0	0	0	0	0	0	0	0	0	0	0	0	0
2010110K18Rik	0	0	0	0	0.00212912	0	0	0		0.00551877	0.00990737	0	0	0	0	0.00756417	0.00908687	0	0	0	0	0.00119908	0.000649935	0	0	0.000322121	0	0.00863856	0.00091448	0	0	0	0	0.000653258	0	0	0	0	0	0.019082	0.059771	0	0.0258613	0.0128445	0
2010111I01Rik	1.1622	0.828087	0.805847	0.262405	0.528421	0	0.703878	0.765961		0.660382	0.537416	1.07299	0.197042	0.279073	0.248987	0.391577	0.435244	0.958625	0.435472	1.00496	0.589908	0.321808	0.547654	0.397468	0.445719	0.716707	0.841482	0.540038	0.90681	0.717922	0.66748	0.590857	0.742137	0.794923	1.08299	0.997088	0.720464	0.657718	0.737119	0.351195	0.758247	0.627902	0.653787	0.641587	0.553449
2010300C02Rik	0.0313754	0.0665823	0.236635	0	0.0481914	0	0	0.100556		0.0149066	0.017075	0.00049136	0	0.00142609	0	0.00469209	0.00461496	0.00162663	0.00316342	0.0126086	0.000321858	0.00198663	0.000841248	0	0	0.000886064	0	0	0.000265251	0	0	0	0.000416074	0.00382674	0	0	0.0011581	0	0.000351959	0	0	0.0066228	0	0.00109238	0
2010300F17Rik	0	0	0	0	0.00947389	0	0	0		0.0019726	0.00141843	0	0	0.00480963	0	0.00302545	0.00650524	0.00135856	0.011498	0.0278008	0.0101901	0.0044651	0.012997	0	0.0113322	0.0135894	0	0	0.00183956	0	0.00250791	0	0.000704102	0.00047782	0	0	0.00161828	0	0.000869305	0	0	0.0143352	0	0.00755872	0
2010308F09Rik	0.00105308	0	0	0	0	0	0	0		0.000505421	0	0	0	0	0	0.000719972	0.000571872	0	0	0	0	0.000546932	0.00112576	0	0	0.000999911	0	0	0.000260908	0	0.0015829	0	0	0.000218105	0.00520768	0	0	0	0	0.0307154	0	0	0	0.000468641	0
2010310C07Rik	0	0	0	0	0.000429658	0	0	0		0.000827014	0.0010093	0	0	0.00165678	0	0.00159862	0.000400838	0	0.00100051	0	0	0	0.00043601	0	0	0.000280256	0	0	0.00127564	0	0.000903428	0	0	0.00327942	0	0	0	0	0	0	0	0	0	0	0
2010315B03Rik	0.0787848	0.19199	0.0809289	0.0690217	0.0793963	0.153544	0	0.0965794		0.0737841	0.0646018	0.100484	0.136713	0.0977908	0.053492	0.0590916	0.0603503	0.0523899	0.0772527	0.116458	0.0859214	0.0590063	0.0826341	0.0754832	0.0756472	0.0941248	0.0845409	0.0784666	0.101952	0.0543495	0.110378	0.08894	0.101069	0.0994655	0.0940567	0.100265	0.126397	0	0.0894033	0.0340745	0.0830841	0.0756429	0.0749888	0.0774109	0
2010320M18Rik	0.336078	0.240108	0.222497	0.0979082	0.332097	0.153544	0	0.367853		0.371759	0.248385	0.180819	0.503252	0.332787	0.300435	0.302703	0.22626	0.147338	0.323162	0.171551	0.223283	0.289559	0.27056	0.228786	0.241221	0.345477	0.327643	0.347854	0.264333	0.119018	0.302577	0.591793	0.175624	0.325323	0.254385	0.197356	0.272025	0.12225	0.208769	0.197815	0.25328	0.144907	0.17626	0.203724	0
2200002D01Rik	1.62859	1.57178	0.300694	0.256519	0.636046	0	0	1.37719		0.731144	0.318974	0.371657	0	0.135712	0.0687107	0.178157	0.120543	0.239565	0.187998	0.0956459	0.123863	0.129553	0.158812	0.125954	0.140702	0.13629	0	0.199641	0.108829	0.0276392	0.0882403	0.145047	0.0507532	0.159891	0.262753	0.108238	0.059975	0.137573	0.0513501	0.0187427	0	0.0459572	0.00666406	0.056449	0
2210008F06Rik	0.0108094	0	0	0	0.0061851	0	0	0.00811952		0.00600804	0	0	0	0.0184713	0	0.00388904	0.0022544	0	0.00413406	0.00416261	0.00323382	0.00182341	0.00367848	0	0.0104338	0.00419819	0	0	0.00404615	0	0.00113769	0	0.00248246	0.00360262	0.00835667	0.00225867	0.00644456	0	0.0016993	0	0	0	0	0.00470418	0
2210011C24Rik	0.00504272	0.0216064	0.0164771	0	0.00305224	0	0	0.00876861		0.00505949	0.00426839	0.00394776	0	0.00132977	0	0.0038361	0.0025916	0.00511403	0.0043084	0	0.00243387	0.00521937	0.00639174	0	0	0.00553646	0	0	0.00329343	0	0.000979896	0	0.00147894	0.00502158	0.00313386	0.00308039	0.00138491	0.0228365	0.00526206	0.0463371	0	0.0415479	0.0286972	0.0242121	0
2210011K15Rik	0.00852053	0	0	0	0.000674642	0	0	0.00154518		0.0048406	0.00109111	0	0	0.000597127	0	0.00266577	0.00131404	0	0.00148952	0	0	0.000688429	0.000221221	0	0	0.000133892	0	0	9.64702e-05	0	0.0024371	0	0	0	0	0	0.000492975	0	0	0	0	0	0	0.00058619	0
2210016F16Rik	1.19713	0.780753	1.246	1.20641	0.905568	0.967064	0.703878	0.867317		1.20808	0.53645	0.716236	0.573041	0.64533	0.759596	0.876762	0.653642	0.53783	0.710344	0.681009	0.51386	0.766583	0.536517	0.884416	0.602337	0.706691	0.664605	0.796574	0.663077	0.545004	0.821995	0.677407	0.674073	0.876475	0.594858	0.68307	0.89223	0.717097	0.627477	0.60332	0.539036	0.495354	0.963577	0.579816	1.0772
2210016L21Rik	0.461296	0.397196	0.532021	0.605645	0.492456	0.314347	0.703878	0.626961		0.475584	0.314878	0.602538	0.0525547	0.411948	0.365852	0.355809	0.36876	0.532919	0.433352	0.202176	0.4715	0.40115	0.400878	0.497477	0.431352	0.40035	0.860292	0.318046	0.527594	0.766844	0.455837	0.621826	0.654805	0.520354	0.405675	0.635042	0.581447	0.412458	0.614259	0.306142	0.516785	0.493558	0.372293	0.35847	0.226783
2210039B01Rik	0	0	0	0	0	0	0	0		0	0	0	0	0.00866738	0	0	0	0	0	0	0	0	0	0	0	0.000106168	0	0	0.000211992	0	0	0	0	0	0	0	0	0	0	0	0	0	0	0	0
2210406O10Rik	0.00119473	0	0.00668312	0	0.00249981	0	0	0.0147408		0.00368431	0.00316131	0	0	0.00182598	0	0.00334915	0.00285745	0.00180136	0.00239367	0	0.00290581	0.000593556	0.001847	0.0483748	0	0.00273855	0	0	0.00464836	0	0.0100637	0	0.00414616	0.00373889	0	0.00347306	0.00876323	0	0.00779144	0	0	0	0	0.00557102	0
2210407C18Rik	0.00151949	0	0.00627819	0	0.00851237	0	0	0.00536731		0.000280328	0.00557794	0.00617887	0	0	0	9.19205e-05	0	0	0	0	0.00069688	0	0	0	0	0	0	0	0.00258231	0	0.012472	0	0.000370659	0	0	0	0.000928055	0	0.000197918	0	0	0	0	0	0
2210408I21Rik	0.0637791	0	0.0553363	0	0.0465197	0	0	0.0684314		0.0685994	0.0308216	0.0420194	0	0.0489387	0	0.0786167	0.053936	0.0440308	0.0491019	0.0341655	0.0469168	0.0804318	0.0538375	0.0438988	0.0665293	0.0665524	0.131334	0.32549	0.0589277	0.0816283	0.0912116	0	0.0526272	0.0642166	0.0767042	0.0464114	0.0668766	0.078663	0.0476115	0.0510772	0.0593896	0.0454219	0.144443	0.0605564	0
2210417A02Rik	0	0	0	0	0.000296132	0	0	0		8.25502e-05	0.00215772	0	0	0.00204735	0	0.00112798	0	0	0	0	0	0	0.000145848	0	0	0.000149568	0	0	0.00100671	0	0.00220196	0	0	0.0022021	0.00423288	0	0	0	0	0	0	0	0	0	0
2210418O10Rik	0	0	0	0	0	0	0	0		0.00116776	0.0013987	0	0	0.00138378	0	0.00118049	0.00142405	0.00054855	0	0	0.0015345	0.00134857	0.00127406	0	0	0.00177551	0	0	0.000734429	0	0.00350411	0	0.000204634	0	0.00311388	0.000993279	0	0	0.000795339	0	0	0.0185564	0	0.00107747	0
2300009A05Rik	0.270696	0.371203	0.3801	0.124879	0.275698	0.307088	1.40776	0.351023		0.228198	0.231142	0.493891	0.157581	0.253946	0.624847	0.207538	0.235225	0.4902	0.294572	0.284046	0.36108	0.200879	0.312695	0.360218	0.222608	0.327715	0.258009	0.344326	0.316033	0.232497	0.267883	0.289945	0.33424	0.258582	0.32602	0.347307	0.285712	0.443202	0.368272	0.216114	0.193937	0.230125	0.251328	0.292024	0.669506
2310001H17Rik	0.0684728	0.0931967	0.133797	0.0749991	0.0700207	0	0	0.0685455		0.0467565	0.0493459	0.0950204	0.210053	0.093226	0.137067	0.0435901	0.0518414	0.0112081	0.0711343	0.0590405	0.0396463	0.0481867	0.0517219	0	0.0498218	0.046634	0.277349	0.158685	0.0381122	0.0438543	0.0962568	0.134202	0.0552463	0.0272526	0.0531084	0.0241132	0.0628954	0.0429205	0.0258561	0.0307154	0.0137264	0.0071676	0.0565194	0.0150231	0
2310001K24Rik	0	0	0	0	0	0	0	0		0	0	0	0	0	0	0	0	0	0	0	0	0	0	0	0	0	0	0	0	0	0	0	0.000371909	0	0	0.000236752	0	0	0.000568222	0	0	0	0	0	0
2310002D06Rik	0	0	0	0	0	0	0	0		5.0044e-05	0	0	0	0.00173118	0	0.00119719	0	0	0	0	0	0.000786914	0.000950114	0	0.0117809	0.00184112	0	0	0.000572961	0	0.00214006	0	0.00127738	0.00049299	0	0.000465674	0	0	0.000322582	0	0	0	0	0	0
2310002L09Rik	0	0	0	0	0	0	0	0		9.47728e-05	0	0	0	0	0	0.00038795	0.000237674	0	0.00341638	0	0.00131694	0.000591444	0.000982074	0	0	0.000256052	0	0	0.000573541	0	0	0	0.00154494	0	0	0.0010222	0	0	0.00311495	0	0	0	0	0	0
2310008N11Rik	0.00205499	0	0	0	0.0023321	0	0	0.00509193		0.00166738	0.00516315	0	0	0.000772993	0	0.00336736	0.00100238	0	0	0	0	0.00278118	0.000847011	0	0	0.000658874	0	0	0.000198465	0	0.000400686	0	0	0.00230605	0	0	0	0	0	0	0	0	0	0.00213261	0
2310009B15Rik	0.457907	0.502083	0.436972	0.820601	0.421599	0.153544	0	0.461741		0.483178	0.33006	0.412662	0.684337	0.398872	0.200708	0.459308	0.412311	0.482512	0.386419	0.10624	0.339975	0.481408	0.386894	0.544946	0.347065	0.345484	0.38128	0.442031	0.469905	0.539495	0.441902	0.276665	0.46028	0.418902	0.417211	0.474139	0.485446	0.218227	0.500247	0.764516	0.757925	0.402057	0.700534	0.426763	0.642527
2310011J03Rik	0.702427	0.663696	0.422966	0.458505	0.528129	0.628694	0	0.564767		0.553579	0.455579	0.696122	0.201183	0.421983	0.192906	0.462049	0.437616	0.774264	0.497186	0.21454	0.448186	0.464205	0.413912	0.629981	0.374676	0.406726	0.515531	0.496593	0.569592	0.49795	0.482876	0.57183	0.597707	0.566983	0.476387	0.648901	0.669264	0.632869	0.673363	0.397946	0.257505	0.552786	0.350405	0.428329	0.718133
2310015D24Rik	0	0	0	0	0	0	0	0		0	0	0	0	0	0	0	0.000277233	0	0	0	0	0	0.000623365	0	0	0	0	0	0.000504107	0	0	0	0	0	0	0	0	0	0	0	0	0	0	0	0
2310016G11Rik	0	0	0	0	0	0	0	0		0	0	0	0	0	0	0	0	0	0	0	0	0	0	0	0	0	0	0	0	0	0	0	0	0	0	0	0	0	8.3339e-05	0	0	0	0	0	0
2310020H05Rik	0	0	0	0	0	0	0	0		9.39795e-05	0	0	0	0	0	0	0	0	0	0	0	0	0	0	0	0	0	0	0	0	0	0	0.0001936	0	0	0.000174613	0	0	0.000514283	0	0	0	0	0	0.221361
2310022A10Rik	0.0732691	0.0465506	0.0662945	0	0.0735663	0	0	0.0347679		0.0700181	0.0665968	0.0943928	0	0.0501113	0	0.0716083	0.0585589	0.054422	0.0566481	0.0129647	0.0574451	0.0838375	0.0526556	0.0230409	0.0309887	0.0642274	0.133296	0.075312	0.0761928	0.111728	0.0780743	0.0593867	0.096721	0.0822492	0.0491351	0.0871594	0.0760431	0.175752	0.102947	0.0803562	0.0277064	0.116824	0.0976117	0.0923757	0
2310022B05Rik	0.482882	0.263629	0.401524	0.476233	0.450188	1.08932	0.703878	0.425066		0.438084	0.376753	0.340179	0.262608	0.43385	0.488794	0.647828	0.822541	0.65325	0.90158	1.06346	0.845665	1.05166	1.0953	0.726869	1.38982	1.06355	0.560146	0.413702	0.511112	0.497886	0.555529	1.13824	0.574706	0.402115	0.401106	0.472384	0.520972	0.475987	0.549413	0.271231	0.363853	0.546754	0.384635	0.64477	0.442723
2310026L22Rik	0	0	0	0	0.00151162	0	0	0.00745112		0.000953059	0.00076557	0	0	0	0	0.000713508	0.000795153	0	0.00620386	0	0	0	0.000114503	0	0	0.000236281	0	0	0	0	0.00137454	0.0265508	0	0.00101756	0	0	0	0	0	0	0	0	0	0	0
2310030G06Rik	0.569358	0.318875	0.25735	0.838023	0.295734	0.384172	0	0.513254		0.306734	0.254481	0.0081661	0.456016	0.0435982	0	0.0644257	0.033267	0.024723	0.0286116	0.0230499	0.0111076	0.0570889	0.0273228	0.0271084	0.0178296	0.0207706	0	0	0.0176581	0.012399	0.0343715	0	0.010134	0.0404985	0.00732587	0.00943372	0.0188598	0.0106936	0.0075218	0	0.0137264	0.0179313	0.0213065	0.0163018	0
2310033P09Rik	0.364989	0.234187	0.422134	0.803003	0.342902	0.192086	0	0.401457		0.462985	0.209715	0.269058	0.466567	0.222619	0.053492	0.241763	0.226506	0.206975	0.29615	0.243803	0.249839	0.236405	0.233921	0.293712	0.369876	0.351346	0.393925	0.255135	0.339216	0.407141	0.345755	0.270899	0.261216	0.372593	0.342941	0.300605	0.334711	0.232434	0.304679	0.426394	0.311868	0.333937	0.42752	0.346992	0.807211
2310034G01Rik	0.0312679	0	0	0	0.00902424	0	0	0.0116322		0.0151867	0.00927022	0.0141367	0	0.00875657	0	0.0136445	0.0132769	0.0482965	0.0219585	0.0102212	0.0239891	0.0190863	0.0255968	0.0598535	0.0141507	0.0269266	0.0991631	0.00882457	0.0136729	0.0239556	0.0104383	0	0.00813382	0.0166545	0.0313414	0.011065	0.0194073	0	0.00955724	0	0.0416544	0.00795499	0	0.00399021	0.226783
2310035C23Rik	0.166836	0.135125	0.338484	0.0527869	0.162102	0	0	0.150779		0.16287	0.152087	0.158505	0.410193	0.168803	0.153661	0.148656	0.122009	0.186456	0.130656	0.37279	0.191921	0.0976142	0.13602	0.0848545	0.123737	0.171592	0.171059	0.18231	0.170364	0.209515	0.162984	0.138555	0.209108	0.152823	0.207496	0.178955	0.163463	0.111431	0.198141	0.0679697	0.255675	0.219784	0.241998	0.136681	0.503651
2310039H08Rik	0.918186	0.617759	0.60015	0.596548	0.581104	0	0	0.586958		0.95999	0.524332	0.776376	1.36966	0.731486	0.574804	1.06958	0.710009	0.834106	1.01072	0.549943	0.762802	1.04252	0.857578	0.674681	1.18266	1.29442	0.152449	1.11147	0.79133	0.672305	1.09631	0.447622	0.55329	1.09969	0.781033	0.613748	0.998254	0.889845	0.605473	0.619581	0.348184	0.492772	0.613571	0.688587	0.801789
2310039L15Rik	0	0	0	0	0.000884338	0	0	0		0.00175068	0	0.00187221	0	0.00222369	0.030612	0.000927018	0.000647682	0.0153984	0	0	0.00423996	0.000430167	0.000319797	0	0	0.00168012	0	0	0.00634796	0	0.00546919	0	0.00613532	0.00952082	0.0131167	0.0157648	0.00373072	0	0.00805429	0	0	0.0107438	0	0.00241605	0
2310040G07Rik	0.0147912	0.0262885	0.0496046	0	0.0229616	0	0	0.0448222		0.0112931	0.015286	0.0269458	0	0.0351465	0	0.00454917	0.0107292	0.0266338	0.0180829	0.0265866	0.0306223	0.0124463	0.0275037	0	0.0142696	0.032597	0	0	0.0309846	0.0457014	0.0232554	0.0195937	0.0331903	0.0242629	0.0529091	0.046683	0.0303948	0.0496725	0.0371672	0	0.0174672	0.0115427	0.00666406	0.0113693	0
2310040G24Rik	0.0564069	0.0564287	0.0323718	0.0749991	0.0261382	0	0	0.0366424		0.0252179	0.0224085	0.0318487	0	0.0164187	0	0.0126724	0.0120589	0.013483	0.0260754	0.00551855	0.0238177	0.0205584	0.0181653	0	0.00611909	0.0173513	0	0	0.0140885	0.0337718	0.027143	0.120861	0.0233422	0.00809439	0.0114356	0.013768	0.0251058	0.0699201	0.0222999	0	0	0.0128292	0.0268599	0.014143	0
2310047D07Rik	0	0	0	0	0.00166119	0	0	0.00241585		0.00155398	0.00135118	0	0	0.000617645	0	0.000765854	0.000392031	0	0.00491891	0	0.00462819	0.00293278	0.00340116	0	0	0.00194824	0	0	0.00191743	0.00729052	0	0	0.00495329	0.00134762	0.00118385	0.00198677	0	0	0.00331978	0	0	0	0	0.00145743	0
2310057M21Rik	0.0994919	0.102866	0.0985903	0	0.0947538	0.192086	0	0.0436102		0.115587	0.118553	0.113506	0	0.0819489	0.0614447	0.131035	0.102054	0.069993	0.091287	0.0772775	0.0708914	0.10158	0.0698351	0.124983	0.0719543	0.0906949	0.0991631	0.0804882	0.0905556	0.0876782	0.106779	0.0943849	0.116453	0.107081	0.0959007	0.114051	0.11598	0.114042	0.105725	0.216301	0.0803252	0.0773358	0.172344	0.113546	0
2310061I04Rik	0.138669	0.267784	0.203526	0.20377	0.120318	0.314347	0	0.162376		0.10621	0.106089	0.213485	0	0.082195	0.338247	0.0895864	0.125102	0.162321	0.0921633	0.0785815	0.14099	0.105271	0.13467	0.257788	0.116464	0.106309	0.0998363	0.0234178	0.135399	0.085368	0.0915055	0	0.135591	0.143192	0.142011	0.166729	0.153121	0.0983616	0.156329	0.138953	0.0551568	0.136246	0.0608767	0.112153	0.221361
2310068J16Rik	0.00343854	0	0.00378053	0.115226	0.0116525	0	0	0.0196238		0.00907665	0.00651057	0.00899414	0	0.00648586	0	0.00926975	0.00953307	0.003052	0.00664886	0.000986509	0.0112515	0.00735034	0.00925891	0	0	0.0079931	0	0	0.00668083	0.0108636	0.000756171	0	0.00505084	0.00726208	0.00386995	0.00658095	0.000634956	0.00591453	0.00783465	0	0.0165886	0.00556654	0.00629524	0.0119695	0
2310069B03Rik	0	0	0	0	0	0	0	0		0.000310251	0	0	0	0	0	0.000468916	0	0	0	0	0	0.000808268	0	0	0	0	0	0	0	0	0.00209018	0	0	0	0	0	0	0	0	0	0	0	0	0	0
2310074N15Rik	0.00133167	0	0	0	0.00205709	0	0	0.00172057		0.00539958	0.00135118	0.00764377	0	0.00174058	0	0.0034529	0.00295827	0	0.0130629	0.0297502	0.00618529	0.00323759	0.00487497	0	0.013628	0.00598801	0	0.00882457	0.004025	0.00980558	0.000469095	0	0.00504091	0.00474985	0.00363507	0.0045996	0.00190152	0	0.005077	0	0	0	0	0.00146239	0
2310075C17Rik	0	0	0	0	0	0	0	0		0.000590328	0	0	0	0	0	0.000440334	0	0	0.00203649	0	0	0.000641269	0	0	0	0	0	0	0	0.0101112	0	0	0.000283391	0	0	0.000377405	0.00180573	0	0	0	0	0	0	0	0
2410002F23Rik	0.188771	0.187369	0.119597	0.111394	0.182892	0	0	0.205937		0.167964	0.230463	0.25551	0.149263	0.193304	0.156346	0.175246	0.242297	0.235634	0.23563	0.313898	0.199667	0.221853	0.201747	0.180226	0.120657	0.187668	0.194347	0.172724	0.226265	0.240396	0.208876	0.235233	0.239857	0.166387	0.191182	0.211737	0.189742	0.428029	0.239538	0.161894	0.166063	0.209058	0.0596375	0.180229	0.221361
2410004B18Rik	0.436882	0.403223	0.213202	0.427895	0.33678	0	0	0.330953		0.501956	0.281845	0.495292	0.555724	0.370754	0.0592831	0.615563	0.452304	0.38873	0.426265	0.376336	0.267108	0.437452	0.315954	0.399666	0.376767	0.455619	0.280247	0.338318	0.401178	0.407879	0.437734	0.344349	0.376249	0.466754	0.395273	0.39311	0.547357	0.35003	0.397558	0.762204	0.436677	0.485373	0.643063	0.578899	0.448144
2410004I01Rik	0.00234092	0	0	0	0.00696401	0	0	0.00458329		0.0070649	0.019439	0.0208351	0	0.0277798	0	0.0077344	0.00572659	0.0196818	0.019846	0	0.0329484	0.00904482	0.0143465	0	0.0448712	0.0209352	0	0.0150141	0.0529731	0.095718	0.0511364	0	0.067592	0.0554498	0.0373078	0.0581355	0.0399478	0	0.0627761	0.022133	0.0165886	0.0324002	0.0227169	0.0174175	0
2410004P03Rik	0.00611989	0	0	0	0.00358517	0	0	0.00219548		0.00480413	0.0199787	0.0283755	0	0.0100782	0.0324005	0.00485515	0.00859659	0.0230883	0.0111932	0.011596	0.0216337	0.00896088	0.010015	0.0517596	0.0297156	0.0137337	0	0.193648	0.0409958	0.0397697	0.00532603	0	0.0226871	0.0408956	0.0481273	0.0657191	0.0397339	0	0.047831	0.0722599	0.0161044	0.0619634	0.0243111	0.0221995	0
2410015M20Rik	2.92375	2.4605	3.02544	3.6154	2.49125	1.42106	3.51939	2.59993		2.82006	1.55933	2.40781	3.34028	2.224	3.16414	2.25792	1.92185	1.94406	2.47923	1.23726	2.19333	2.41282	2.3731	1.73978	2.49273	2.50058	2.98423	3.12117	2.11631	1.9945	2.31858	1.5696	1.84442	2.40174	2.13457	1.95923	2.35269	1.8813	1.82333	2.50108	1.94189	1.68929	2.23081	1.95257	1.39306
2410018L13Rik	0.0913308	0.0922061	0.0672458	0.299022	0.108992	0.192086	0	0.0917059		0.119277	0.0666328	0.0236127	0.105027	0.0443987	0	0.0686839	0.0671671	0.0209595	0.0571276	0.0476407	0.0541972	0.0767312	0.0933613	0	0.0551425	0.0847581	0.0991631	0.0496472	0.0405683	0	0.0360518	0	0.0145508	0.0356121	0.067635	0.0315357	0.0344607	0.0761463	0.0184416	0.0455885	0.0618052	0.0612059	0.074867	0.0941553	0
2410080I02Rik	0.0148697	0	0.0224641	0	0.0174294	0	0.703878	0.0203593		0.0151281	0.0089705	0.0189885	0	0.0358177	0	0.0148551	0.0157331	0.0207742	0.0165275	0.0457698	0.048323	0.0185766	0.0294612	0.0181694	0.0216768	0.0314089	0	0.015872	0.033054	0.0599141	0.0423202	0	0.0473538	0.0360427	0.0183615	0.0328063	0.0366031	0.00591453	0.0411186	0.0235098	0.0455828	0.019176	0.0419368	0.0207426	0
2410089E03Rik	0.104322	0.114697	0.074835	0.0489541	0.12849	0	0	0.0921368		0.113925	0.115058	0.161161	0.0525547	0.149183	0.0837247	0.124109	0.145862	0.185124	0.114557	0.350992	0.183492	0.111373	0.151289	0.131066	0.072361	0.161923	0	0.0714125	0.176441	0.12767	0.214697	0.146008	0.199811	0.161755	0.156388	0.21084	0.160722	0.163601	0.214418	0.174821	0.182047	0.167052	0.273008	0.183499	0.725013
2410131K14Rik	0.0806709	0.0188421	0.0216261	0	0.0498685	0	0	0.0342799		0.0714821	0.0474788	0.0418826	0.144488	0.0508491	0	0.0654188	0.0492943	0.0565967	0.0595779	0.0331428	0.0515417	0.0596061	0.0537475	0.10434	0.0724042	0.0527164	0	0.029136	0.052654	0.147592	0.045403	0	0.0564823	0.0512695	0.0400681	0.0514701	0.0463127	0.0720529	0.0644601	0.0192232	0.0424361	0.120418	0.0427824	0.0291412	0.221361
2510002D24Rik	0.826139	0.540444	1.0295	0.434251	0.517034	0	0.703878	0.724654		0.493721	0.235591	0.356226	0.443557	0.260103	0.4353	0.226984	0.197358	0.173431	0.308717	0.403847	0.296393	0.252468	0.277681	0.288862	0.229519	0.332277	0.0659309	0.396397	0.247337	0.317924	0.393432	0.163521	0.331379	0.295242	0.295847	0.281786	0.253033	0.142125	0.236322	0.0977801	0.117237	0.118058	0.211099	0.150405	0.221361
2510009E07Rik	0.0697654	0.145461	0.136074	0	0.126781	0	0	0.105953		0.0882533	0.0706156	0.308354	0.152583	0.218686	0.404774	0.139725	0.125233	0.184193	0.0989963	0.166269	0.160024	0.0899783	0.122331	0.133955	0.0900767	0.1211	0.3086	0.0304394	0.160877	0.08599	0.132326	0.0207715	0.150561	0.175239	0.144951	0.205501	0.130317	0.0802248	0.165933	0.164017	0.0232848	0.158251	0.0377024	0.126243	1.0073
2510017J16Rik	0.0161016	0.0275956	0.00596194	0	0.0137111	0	0	0.0130499		0.0142373	0.00878276	0.0116724	0	0.0147096	0.13871	0.0104557	0.0114847	0.0113864	0.0188961	0.0418037	0.0190237	0.020431	0.0166684	0.0780131	0.0166632	0.017686	0	0.00764105	0.0182165	0.0520342	0.0307679	0	0.0227667	0.0181801	0.0102552	0.0200993	0.009466	0	0.0241796	0.0340785	0.0332579	0	0.0140118	0.0188873	0
2510039O18Rik	0.270374	0.486815	0.185919	0.435171	0.207532	0.153544	0	0.251613		0.233667	0.146097	0.303153	0	0.226789	0.230906	0.246412	0.299008	0.30879	0.289434	0.428175	0.263637	0.246654	0.221995	0.265497	0.256686	0.246637	0.167246	0.145367	0.235463	0.224467	0.20862	0.273217	0.229618	0.216071	0.292338	0.277468	0.209382	0.390811	0.308527	0.223386	0.335896	0.33137	0.147085	0.242924	0.503651
2510046G10Rik	0.0310725	0	0.0396706	0	0.0228085	0	0	0.0348611		0.0362869	0.0236116	0.0635257	0.0644695	0.0144438	0.0651067	0.0356758	0.0309721	0.0398051	0.0332697	0.00843621	0.0282157	0.0346788	0.0298152	0.0479474	0.0494999	0.0382306	0.090763	0.113124	0.0300696	0.0615312	0.0403438	0	0.0327391	0.0419775	0.0225274	0.0313472	0.0290071	0.0253466	0.0312389	0.044864	0.0414381	0.0174519	0.00523738	0.0333958	0.194382
2600006K01Rik	0.032657	0.0239798	0.0191389	0.127786	0.0660884	0	0	0.0291117		0.0413696	0.0188064	0.0397004	0	0.0401903	0.030612	0.0432048	0.0442412	0.0487264	0.043593	0.0959922	0.046451	0.060148	0.0616744	0.138722	0.0474787	0.0568052	0.0845409	0.0320647	0.0474854	0.0290156	0.0554401	0	0.0236669	0.0458821	0.0508897	0.0395207	0.0391845	0.027512	0.0416306	0.0511249	0.0157642	0.0774393	0.00592108	0.0247178	0
2600014E21Rik	0	0	0	0	0.000994442	0	0	0		0.0018071	0.00458776	0	0.224827	0.00769549	0	0.0124709	0.027071	0	0.0276329	0.0366302	0.00879725	0.0234474	0.0252122	0	0.039835	0.0202364	0	0	0.00765234	0.012399	0.00945681	0	0.0111702	0.00175085	0.00118575	0.00287212	0.00538373	0	0.00360185	0	0.0278862	0	0	0.0265064	0
2610001J05Rik	1.11869	1.2774	0.81531	1.02415	0.990131	1.12787	1.40776	0.904504		1.03517	1.07934	1.70632	1.02619	1.28185	1.49449	1.33218	1.24149	1.53889	1.54919	0.946425	1.38382	1.37778	1.31167	1.319	1.54121	1.37436	1.46117	2.32795	1.64541	1.7364	1.4757	0.871839	1.57659	1.66799	1.67524	1.62561	1.55355	1.37088	1.68998	1.50299	1.66394	1.7021	1.51545	1.63701	2.05444
2610002M06Rik	0.33231	0.239219	0.193669	0.221024	0.280039	0.628694	0	0.299006		0.303996	0.208261	0.145153	0.197042	0.245404	0.260778	0.256126	0.245014	0.121078	0.258463	0.157422	0.202697	0.282289	0.209139	0.188231	0.250777	0.244272	0.162594	0.126094	0.224943	0.144219	0.234365	0.322177	0.178686	0.257438	0.168348	0.179342	0.200751	0.263852	0.177897	0.300533	0.267868	0.235492	0.183166	0.273544	0
2610008E11Rik	0.0367842	0.172669	0.0752236	0.0903342	0.0765156	0	0	0.0788916		0.0556397	0.0331741	0.0999276	0	0.0911118	0	0.0527149	0.0837532	0.0758455	0.108134	0.188596	0.127443	0.0597977	0.0974122	0.0180553	0.115201	0.0930964	0	0.101051	0.0962647	0.11142	0.124538	0.139364	0.127307	0.0761244	0.118986	0.121753	0.0880116	0.0336289	0.127295	0.143853	0.133722	0.0527694	0.038797	0.0693006	0
2610020C07Rik	0.0168281	0	0.00783676	0	0.0167863	0	0	0.0197672		0.0220244	0.032588	0.00638042	0	0.00799321	0.0592831	0.0194189	0.0259072	0.00979298	0.0115844	0	0.0135935	0.0054198	0.0122597	0	0	0.00941691	0.0659309	0.00863856	0.017855	0.0347931	0.0149485	0.340994	0.0105528	0.0177913	0.012883	0.0123332	0.0134168	0.0261055	0.0151385	0	0.0434297	0.0609988	0.0296332	0.0543707	0
2610021A01Rik	0.0349431	0.0227791	0.017083	0	0.0264929	0	0	0.0222409		0.0297027	0.020706	0.0337533	0	0.0335321	0.122037	0.023128	0.0320769	0.0271636	0.0227313	0.0208448	0.0305838	0.0156241	0.0210615	0.0220323	0	0.0310377	0.090763	0	0.0401101	0.0650449	0.0428571	0.0593867	0.0477557	0.0358346	0.0373673	0.0396629	0.0467208	0	0.042626	0.0407963	0.0536806	0.114817	0.0304089	0.0264504	0
2610035D17Rik	0.0674304	0.134603	0.229902	0.213042	0.0984297	0	0	0.0910318		0.0489401	0.0447318	0.164523	0.0644695	0.0759563	0.339163	0.0304639	0.039301	0.110817	0.0838204	0.0803678	0.122427	0.0530384	0.0979891	0.0916229	0.0711561	0.105588	0.0865179	0.326775	0.165322	0.218535	0.105984	0.0378193	0.218074	0.0947597	0.10459	0.209383	0.135591	0.083335	0.220615	0.109282	0.123863	0.12301	0.0737101	0.121494	0
2610037D02Rik	0.0762284	0.197948	0.150054	0	0.0771409	0	0	0.0957822		0.0518944	0.0768609	0.0788197	0.0525547	0.0697143	0.0324005	0.0513662	0.0836436	0.0694981	0.0633168	0.0617313	0.0837373	0.0524913	0.0843159	0.0756519	0.0417644	0.0659616	0.0632511	0.0700227	0.0839055	0.0560725	0.0706806	0.0863828	0.0950925	0.0736543	0.0736961	0.0964761	0.092969	0.0588317	0.106423	0.115882	0.0411091	0.11927	0.043516	0.0673984	0
2610042L04Rik	0	0	0	0	0	0	0	0		0	0	0	0	0	0	0	0.000557891	0	0	0	0	0	0.000332344	0	0	0.000394779	0	0	0.000133037	0	0	0	0	0	0	0	0	0	0	0	0	0	0	0	0
2610044O15Rik8	0.073677	0.161175	0.151757	0	0.112725	0	0	0.0709366		0.108326	0.0646016	0.207889	0.128939	0.100243	0	0.098961	0.0811684	0.230898	0.124015	0.16352	0.122135	0.10152	0.101266	0.126219	0.215315	0.115207	0.193674	0.275121	0.124763	0.148345	0.113913	0.106887	0.121823	0.140333	0.0822887	0.124882	0.154849	0.140387	0.111106	0.116259	0.0980705	0.11201	0.110849	0.113644	0
2610206C17Rik	0.0049028	0	0	0	0.00283192	0	0	0.00525799		0.000719595	0	0	0	0.001638	0	7.82627e-05	0.00074578	0	0.00217099	0.00363144	0	0	0.000378468	0	0	0.000126681	0	0	0.000350753	0	0.000664374	0	0	0	0	0	0.000941046	0	0	0	0	0	0	0.00128397	0
2610300M13Rik	0	0	0	0	0.000948499	0	0	0		0	0	0	0	0.00483426	0	0	0.000481465	0	0	0.0016669	0	0	0.00128595	0	0	0.000683288	0	0	0.000472255	0	0	0	0	0	0	0	0	0	0	0	0	0	0	0	0
2610301B20Rik	0.0870376	0.159008	0.101372	0.0527869	0.117813	0	0	0.143096		0.108042	0.0582896	0.130279	0	0.133213	0.118696	0.103607	0.114218	0.108565	0.142699	0.214986	0.145311	0.107063	0.117699	0.156959	0.174846	0.158224	0.090763	0.0281404	0.171678	0.243918	0.158125	0.676396	0.157587	0.197422	0.21999	0.16893	0.187192	0.172436	0.168135	0.260563	0.179166	0.122621	0.0988926	0.167839	0
2610318N02Rik	0.000970842	0	0	0	0.00561167	0	0	0.00162679		0.0104385	0.00873736	0	0	0.000613319	0	0.00814875	0.00587807	0	0.00416052	0	0	0.00491635	0.00338633	0	0.0121666	0.00148411	0	0	0.000662518	0	0.000705755	0	0	0.00202516	0.000742875	0	0	0	0	0	0	0	0	0.0018682	0
2610507B11Rik	0.287455	0.404092	0.329769	0	0.28154	0.314347	0	0.346967		0.243888	0.223294	0.258459	0.274061	0.29153	0.621109	0.212043	0.23041	0.313275	0.191304	0.293101	0.264905	0.1385	0.180803	0.237161	0.0940106	0.185535	0.247542	0.0739766	0.252891	0.300689	0.250233	0.106475	0.272619	0.246741	0.304854	0.319185	0.196357	0.163799	0.301068	0.197139	0.276016	0.351817	0.238652	0.262302	0.924817
2610524H06Rik	0.302161	0.30636	0.131001	1.00668	0.334291	0	0	0.203719		0.553152	0.250201	0.199239	0.745626	0.434973	0.166933	0.628093	0.40378	0.24851	0.428018	0.256599	0.33358	0.439249	0.352241	0.24558	0.560617	0.513533	0.342942	0.52232	0.337157	0.206607	0.352896	0.67624	0.194177	0.4641	0.318212	0.225712	0.453484	0.213138	0.215269	0.744678	0.298808	0.523585	0.612746	0.61228	0
2610528A11Rik	0.000974309	0	0	0	0.00626969	0	0	0.00278253		0.00352876	0.00128483	0	0	0.000991899	0	0.000935842	0.000321382	0	0	0	0.000818559	0	0.000153878	0	0	0.00035525	0	0	0.000161085	0	0.00187344	0	0.000269546	0	0	0.000194574	0	0	0.00114607	0	0	0	0	0	0
2700012I20Rik	0.00472885	0.0262885	0	0.0749991	0.00540768	0	0	0.00807023		0.00927515	0.0783479	0.0273786	0	0.0122023	0	0.00715922	0.00913973	0.0504053	0.0138318	0.00404466	0.0154365	0.00647428	0.0109045	0	0.013454	0.00969598	0.221725	0.0060885	0.015865	0.0366253	0.0239528	0	0.0186974	0.0106781	0.0195814	0.0178422	0.011436	0	0.0197885	0	0	0.0140538	0.0150401	0.0169428	0
2700016F22Rik	0	0	0.0105134	0	0.000833268	0	0	0.00248632		0.00276571	0	0.00709918	0	0.0028902	0	0.00279928	0.00357607	0.0102609	0.00505224	0	0.0048526	0	0.00235165	0	0	0.00237933	0	0	0.00292928	0	0.00263088	0	0.00510478	0.00289852	0	0.00460085	0.000492975	0	0.00596326	0.0272109	0	0	0.0137596	0.000698346	0
2700033N17Rik	0.105803	0.0646728	0.0734527	0	0.0706687	0	0	0.0803354		0.0542151	0.0381278	0.0557024	0	0.0885071	0	0.023532	0.0310344	0.0415693	0.0216888	0.0158174	0.0446155	0.0311322	0.0296053	0.0705782	0.040031	0.0226701	0	0.0412609	0.0389781	0.00804948	0.0742322	0	0.0270941	0.0294439	0.0323295	0.0314202	0.0350245	0.0281122	0.0289659	0.0438352	0	0.012299	0.0191193	0.0161646	0
2700038G22Rik	0.0216316	0.0947795	0.0309651	0	0.0158239	0	0	0.0113625		0.022937	0.0260257	0.0407047	0.0525547	0.0255212	0	0.0289711	0.0378903	0.0188538	0.0218903	0.0132308	0.0192578	0.0240462	0.0229262	0	0.0253027	0.0152984	0	0.0317461	0.0263838	0.00817296	0.0157256	0.0306118	0.0213417	0.0225165	0.0190448	0.0213728	0.0203702	0.0595035	0.0199421	0.0264845	0.086438	0.0738797	0.0394264	0.0416122	0
2700046A07Rik	0	0	0	0	0.000235568	0	0	0		0.000800339	0	0.0171486	0	0	0	0.000270597	0	0.00200284	0	0	0.000498386	0	0.000386566	0	0	0.000164654	0	0	0.0169756	0	0.0663447	0	0.0153094	0.00665138	0.00333276	0.00102047	0	0	0.00101985	0	0	0	0	0	0
2700046G09Rik	0.064802	0	0.0757927	0.139288	0.0691197	0.192086	0.703878	0.0570394		0.0432676	0.0192707	0.0161309	0.105027	0.0431781	0	0.0300096	0.024747	0.057834	0.0371134	0.0386658	0.0648749	0.0293593	0.0525454	0.0550332	0.0483115	0.0480944	0.186354	0.0124434	0.0353558	0.0261353	0.0557926	0.0195937	0.0255073	0.0320237	0.0536784	0.0228769	0.03393	0	0.0238072	0	0.0615896	0.00725748	0.0310699	0.0244222	0
2700049A03Rik	0.0993379	0.111935	0.03891	0.309631	0.0624749	0	0	0.0625528		0.0870163	0.0607115	0.0935192	0	0.0475586	0	0.0774232	0.0754072	0.0807138	0.0716042	0.0951295	0.0580579	0.0620591	0.0585301	0.0710029	0.0660584	0.0824581	0	0.0811132	0.0645885	0.0506182	0.135088	0.346348	0.0913812	0.0742665	0.055062	0.0733447	0.0811142	0	0.0790984	0.12868	0.227817	0.187694	0.191988	0.183911	0.221361
2700062C07Rik	0.269291	0.216165	0.27994	0.271807	0.215406	0.192086	0	0.200127		0.264359	0.128702	0.347678	0.233966	0.212573	0.223445	0.254108	0.235421	0.25578	0.222432	0.163633	0.211434	0.259373	0.219012	0.181586	0.236053	0.274269	0.318977	0.752994	0.246666	0.247512	0.244438	0.0945613	0.249904	0.257851	0.205043	0.245347	0.295047	0.191172	0.243884	0.103061	0.303	0.256653	0.118481	0.267108	0.388765
2700069I18Rik	0	0	0	0	0.00325536	0	0	0.00133448		0.00310709	0	0	0	0.0165392	0	0.0034607	0.00208256	0	0	0.00165533	0	0.00318218	0.00117554	0	0	0.00113248	0	0	0.000178831	0	0.00235822	0.0195937	0.000814142	0.00235312	0	0.000747076	0.001144	0	0.000155457	0	0	0	0.0184058	0	0
2700081O15Rik	0.101221	0.045333	0.181787	0.0690217	0.093331	0.307088	0	0.106431		0.0850732	0.0749817	0.0694263	0.37409	0.137446	0.424391	0.105538	0.0951173	0.191024	0.0945191	0.266621	0.180784	0.0802992	0.114631	0.168685	0.0724585	0.0880693	0.329764	0.00764105	0.127072	0.217181	0.134951	0.0806589	0.182674	0.140913	0.159257	0.202262	0.128319	0.179582	0.209954	0.0694276	0.133682	0.111224	0.0941874	0.0852542	0
2700097O09Rik	0.112407	0.0771808	0.0756218	0.129698	0.112761	0	0	0.0993904		0.129925	0.0780366	0.133359	0.210053	0.138661	0.0938452	0.10433	0.100287	0.137411	0.099845	0.11033	0.108181	0.108172	0.0880443	0.17017	0.0587756	0.0852434	0.133296	0.12015	0.151139	0.139973	0.107267	0.189844	0.156275	0.123689	0.152024	0.161643	0.134978	0.298127	0.170533	0.0963948	0.114559	0.180195	0.151896	0.114851	0.226783
2810001G20Rik	0.110905	0.0652276	0.106436	0	0.105616	0	0	0.11861		0.0848759	0.0632771	0.140423	0.301846	0.0953564	0	0.0771866	0.0841166	0.13487	0.0849761	0.129681	0.0765922	0.0623998	0.0987011	0.194599	0.0459809	0.107798	0.177281	0.281284	0.127496	0.0716084	0.102972	0.102078	0.140339	0.12271	0.0960028	0.118809	0.120968	0.185932	0.155281	0.0441541	0.0646226	0.0964888	0.0424136	0.0889584	0
2810004N23Rik	0.708623	0.55378	0.451544	0.78152	0.579793	0.153544	0	0.45722		0.7658	0.444309	0.639449	0.420189	0.438555	0.575173	0.60693	0.531604	0.498337	0.383887	0.278154	0.334921	0.504173	0.354223	0.128882	0.545402	0.425877	0.417894	0.401455	0.4437	0.445772	0.436687	0.360814	0.371064	0.40891	0.385754	0.353005	0.487289	0.277558	0.351616	0.261725	0.394762	0.400609	0.553198	0.455228	0.503651
2810006K23Rik	0.121817	0.0506424	0.131073	0.317706	0.137928	0	0	0.135356		0.130554	0.0927691	0.117148	0	0.104559	0.0429415	0.100897	0.154999	0.105671	0.172855	0.02495	0.122059	0.107881	0.117194	0.175765	0.10033	0.110231	0.179956	0.273971	0.125198	0.112372	0.104093	0.12482	0.100009	0.138054	0.0966772	0.120804	0.0914508	0.145594	0.128413	0.334087	0.397255	0.441376	0.20934	0.326955	0.58585
2810021J22Rik	0.0231267	0	0.0160632	0	0.0257052	0	0	0.0292457		0.0249475	0.0188978	0.0154446	0	0.0327209	0.0616101	0.021752	0.0383182	0.047129	0.0312702	0.140124	0.0380308	0.0189907	0.0271407	0.068279	0.0205022	0.0269388	0	0.00669936	0.0351819	0.0619343	0.0268018	0.0959398	0.0402183	0.0300767	0.023317	0.0412468	0.0292819	0.018953	0.049706	0.0570344	0	0.0297691	0	0.0239135	0
2810032G03Rik	0.013624	0	0	0	0.00400459	0	0	0.0127114		0.0078646	0.00190575	0	0	0.00391536	0	0.00315074	0.0043464	0.00546818	0.00281608	0.00161163	0.0140802	0.00252071	0.00979067	0	0	0.0172724	0	0	0.00540107	0	0.00358591	0	0.00348414	0.00403688	0.0082053	0.00334283	0.0108561	0	0.000977599	0	0	0	0.0217587	0.0062147	0
2810402E24Rik	0.0692991	0.0188421	0.120898	0	0.106816	0	0	0.0954379		0.0801855	0.0714626	0.135907	0.205138	0.063909	0	0.0764472	0.0871129	0.128384	0.0816281	0.062832	0.0913903	0.0815572	0.0848944	0.0963838	0.0716512	0.092848	0	0.161824	0.0943084	0.14227	0.0567524	0.1534	0.0887347	0.0826016	0.106854	0.0829444	0.0971903	0.12254	0.0907885	0.133228	0.182836	0.13496	0.0896418	0.108763	0
2810403A07Rik	0.217321	0.203531	0.254353	0.0624395	0.177561	0	0.703878	0.238783		0.167408	0.145637	0.230475	0.327077	0.193463	0.239254	0.154799	0.182157	0.188842	0.247149	0.477116	0.237291	0.141085	0.196045	0.355058	0.229688	0.212501	0.0991631	0.119203	0.224947	0.204812	0.269566	0.177147	0.25384	0.200262	0.195702	0.23596	0.241666	0.229327	0.252249	0.257647	0.176124	0.267873	0.208843	0.212398	0.553449
2810403G07Rik	0	0	0	0	0.00047962	0	0	0		0.000276954	0	0	0	0.00257841	0	0.00273725	0.00433286	0	0.00148485	0.00236796	0	0.00320706	0.000816856	0	0	0.000535402	0	0	9.14523e-05	0	0	0	0	0	0	0	0	0	0	0	0	0	0	0.00244853	0
2810405F17Rik	0.0119784	0	0	0	0.00945038	0	0	0.0241717		0.00543654	0.0241383	0.0376084	0.105027	0.00984316	0.130155	0.0052907	0.00785324	0.0258736	0.00474626	0.00729368	0.0152133	0.00401261	0.00709818	0	0	0.00542203	0	0.0628141	0.0191343	0.0204772	0.0178985	0	0.0334126	0.0136077	0.0143206	0.0323266	0.00989499	0.0228365	0.0335247	0	0	0	0.00416782	0.0123866	0
2810407A14Rik	0	0	0	0	0.00058354	0	0	0.00207578		0	0	0	0	0.000519608	0	0	0.00154674	0	0	0	0	0	0.000476533	0	0	0.000122377	0	0	6.55966e-05	0	0	0	0	0	0.000894658	0	0	0	0	0	0	0	0	0	0
2810408A11Rik	0.0453756	0.0216064	0.0213706	0.0690217	0.0411733	0	0	0.042337		0.0238373	0.010195	0.0145662	0.0644695	0.0175741	0	0.0120085	0.0165284	0.00892504	0.0201531	0.0253493	0.0244291	0.0169034	0.0192983	0	0.00842946	0.0188527	0	0	0.011845	0.00823567	0.0152463	0.0306118	0.00424024	0.00830012	0.0131437	0.00599743	0.00977828	0	0.0056729	0.0244388	0.0194401	0.0194468	0.0090379	0.0343519	0
2810414N06Rik	0.0141206	0.0404485	0	0	0.0103872	0	0	0.0104416		0.00682566	0.00332974	0.0149727	0	0.0105653	0.0324005	0.00537983	0.0168631	0.0149044	0.0122943	0	0.0125928	0.00750965	0.0118944	0	0.0234843	0.0106614	0	0.00882457	0.00993406	0	0.0110149	0	0.00652976	0.00769449	0.011353	0.00630286	0.0013681	0	0.00600469	0	0	0.0189218	0.0125792	0.00322203	0
2810425M01Rik	0	0	0	0	0.00078712	0	0	0		0	0	0	0	0	0	0	0.000228423	0	0	0	0	0	0.00193074	0	0	0.00102864	0.0865179	0	0.00235691	0	0	0	0.00106946	0	0.0021133	0.00207248	0	0	0.00315985	0	0	0	0	0	0
2810429I04Rik	0.0162812	0.0196919	0	0	0.00564613	0	0	0.00342307		0.0168628	0.0119119	0	0	0.00086501	0	0.00361038	0.00313169	0	0.00256877	0	0	0.00217518	0.000658539	0	0	0.000311552	0	0.00669936	0	0	0.00105892	0	0	0.000259893	0.00435414	0	0.00142194	0	0	0	0	0	0.00629843	0.000708556	0
2810433D01Rik	0.00466917	0.0275956	0	0.124879	0.0293477	0	0	0.0273612		0.0167457	0.012303	0.00629175	0	0.0349586	0.0380987	0.0152125	0.020264	0.111437	0.109881	0.0332426	0.0806344	0.0408191	0.0847129	0.149185	0.0389466	0.0818625	0.0954153	0.196689	0.0524215	0.0181977	0.10043	0.0797231	0.0322043	0.0603272	0.0557766	0.0322241	0.0772082	0.126578	0.0371828	0	0.030567	0.0212214	0.0374667	0.0346406	0
2810442N19Rik	0	0	0	0	0.00128065	0	0	0		0.000992102	0	0.0016881	0	0.000659568	0	0.00358518	0.0059879	0.00616453	0.0128412	0.0274468	0.0124307	0.014506	0.0153858	0	0.00686629	0.0171513	0.156779	0	0.00669441	0	0.0160811	0	0.00629166	0.00656313	0.00353893	0.00400519	0	0	0.0056036	0	0	0.0198251	0.013442	0.00866175	0
2810454H06Rik	0.00704284	0.045333	0.0678735	0.128259	0.0269834	0	0	0.0193155		0.0314756	0.0868338	0.0581375	0	0.0286898	0.0324005	0.0298041	0.0413004	0.0354738	0.0238885	0.0977335	0.0449928	0.0280895	0.0336679	0.0666389	0.0720645	0.056176	0.0991631	0.00805594	0.0355459	0.0394645	0.0477328	0.0887114	0.0534076	0.0223033	0.0220706	0.0486454	0.0303071	0.00591453	0.049829	0	0.0152835	0.0577283	0.0153243	0.0503023	0.221361
2810455O05Rik	0.00408491	0	0	0	0.00396085	0	0	0.00287261		0.00751287	0.00724072	0	0	0.00852124	0	0.0102537	0.00866628	0	0.00368811	0	0.00211516	0.00213549	0.00255184	0	0	0.00181374	0	0	0.00280065	0	0	0	0.00151241	0.00149519	0	0.000384701	0.00097429	0	0.000984899	0.022133	0.0212168	0.0480509	0.0589322	0.0219094	0
2810457G06Rik	0.00671214	0	0.00783676	0	0.0103938	0	0	0.00385601		0.0161712	0.0113388	0.00556628	0	0.0210637	0	0.0208687	0.0244237	0.00676716	0.0133276	0.022138	0.0111827	0.0356009	0.0229187	0.0427846	0.038651	0.0170775	0	0	0.00991002	0.0128192	0.016479	0	0.0121057	0.0211152	0.00571454	0.0104261	0.00747976	0	0.0131616	0	0.0250344	0	0.0136571	0.014934	0
2810459M11Rik	0.00136516	0	0	0	0.0011678	0	0	0		0.0022707	0.00130675	0	0	0.00644152	0	0.0024278	0.0013341	0	0	0	0	0.000505917	0.00016826	0	0	5.47962e-05	0	0	0	0	0.00365861	0	0	0.000442486	0	0	0	0	0	0	0	0	0.00666406	0	0
2810474O19Rik	0.592027	1.17265	0.863857	0.934341	0.739107	0.782237	0.703878	0.773989		0.672865	0.535895	0.736384	0.249597	0.878384	0.744095	0.6814	0.636865	0.674948	0.421347	0.631192	0.639358	0.623025	0.432525	0.617657	0.470861	0.428325	0.46745	0.283629	0.582804	0.646657	0.950258	0.842538	0.891373	0.45326	0.487393	0.59491	0.46386	0.711979	0.632912	0.477166	0.617126	0.613627	0.587847	0.455168	0.221361
2900009J06Rik	0.0168584	0	0	0	0.0208424	0	0	0.0186062		0.0187941	0.00521378	0.0555824	0.0525547	0.0222622	0	0.0121093	0.021545	0.012097	0.0108425	0.00242018	0.0203311	0.0107014	0.0188672	0.0462467	0	0.0182998	0	0.0226552	0.0180676	0.0129581	0.0113515	0.121886	0.01283	0.0141863	0.017421	0.0119238	0.0147208	0.0106936	0.0165292	0	0.0233059	0.0117384	0.0159291	0.0162759	0
2900011O08Rik	0	0	0	0	0.00212597	0	0	0		0.000502379	0	0.00621991	0	0.00189452	0	0.00124361	0.000635963	0.00183849	0.00085714	0	0.00106367	0.00101184	0.000868139	0	0	0.000558757	0	0	0.00520802	0	0.0280682	0	0.00373232	0.00103316	0.00424015	0.000826178	0.00225234	0	0.00046753	0	0	0	0	0	0
2900026A02Rik	0.0508717	0.114935	0.0898329	0	0.0814793	0	1.40776	0.0732439		0.0606592	0.104356	0.141193	0.0525547	0.0769511	0.206187	0.0628152	0.157695	0.116339	0.0850483	0.224322	0.09628	0.0585128	0.190523	0.0614431	0.027835	0.13617	0.16826	0.0542313	0.0984143	0.0499844	0.0631075	0.148986	0.080206	0.0855969	0.114271	0.107345	0.0708472	0.0736227	0.0979144	0.0452967	0.0933184	0.0638921	0.0488092	0.0959021	0
2900045O20Rik	0	0	0	0	0	0	0	0		0	0.00137658	0	0	0	0	0	0.000480807	0.00466997	0	0	0.00073714	0	0.000201233	0	0	0.000976548	0	0	0.000444213	0	0	0	0.000881298	0	0.00555612	0.00239914	0	0	0.000640318	0	0	0.0117384	0	0	0
2900055J20Rik	0	0	0	0	0	0	0	0		0.000208338	0	0	0	0	0	0.00037307	0.000587921	0.00217646	0	0.00977422	0.00349186	0.000492644	0.000448997	0	0	0.00194079	0	0	0.00237094	0	0.0089322	0	0.00739185	0.00144816	0.00582911	0.00132963	0	0	0.00101102	0	0	0	0	0	0
2900060B14Rik	0.0225063	0.0216064	0.0381735	0	0.0282946	0	0	0.00921966		0.0205587	0.0195651	0.0477421	0	0.0269654	0.0685453	0.0153057	0.0331808	0.0846512	0.0435626	0.0742723	0.0331822	0.0352786	0.0373116	0.0231813	0.0111475	0.0391618	0	0	0.0399553	0.0241618	0.0182765	0.01469	0.0376127	0.0236284	0.0356591	0.042345	0.0223084	0.0307195	0.0419305	0.023176	0.0157642	0.0248083	0.0412421	0.0337685	0
2900072N19Rik	0	0	0	0	0	0	0	0		0.000498419	0	0	0	0	0	0.00135923	0.00129756	0	0	0	0	0.00105203	0.000317896	0	0	0.000298877	0	0	0.000147787	0	0	0	0	0	0	0	0.00191656	0	0	0	0	0	0	0	0
2900076A07Rik	0.0497706	0	0.0312885	0.0690217	0.0410989	0	0	0.0561312		0.0434698	0.0377566	0.0791553	0.24174	0.0653392	0.0837247	0.0453388	0.0400272	0.0841999	0.0923963	0.0674057	0.0589301	0.0399854	0.0656309	0.123955	0.0717043	0.0886185	0.317718	0.109239	0.0824903	0.0996171	0.0619673	0.096626	0.0735574	0.0906533	0.0587158	0.0745775	0.0838107	0.0552263	0.0803309	0.039988	0.011108	0.131237	0.017317	0.0773447	0
2900089D17Rik	0.0203623	0.0216064	0.143689	0	0.0477006	0	0	0.0608672		0.0423097	0.0123808	0.0724576	0	0.0402543	0.0831324	0.013146	0.0119868	0.0371061	0.0252122	0.0528052	0.0277661	0.0175873	0.0333897	0.0321521	0.0318413	0.0331804	0	0.00614628	0.0354811	0.00602747	0.0758204	0.179466	0.0348207	0.0259764	0.0434743	0.0286523	0.0299026	0	0.0339218	0	0	0.025443	0.0255064	0.0157933	0
2900093K20Rik	0.0163813	0	0.0333765	0.128259	0.029944	0	0	0.0352341		0.0287736	0.0494754	0.0440593	0	0.0593846	0.030612	0.0303749	0.0311455	0.0328327	0.0372751	0.0634951	0.0465003	0.0249728	0.0489346	0.0684172	0.0398212	0.0526438	0.195252	0.015697	0.0518552	0.059639	0.0426231	0.121761	0.0486285	0.0425467	0.028936	0.0560211	0.0506094	0.125442	0.0486903	0	0.0502002	0.0805773	0.0164623	0.0450997	0
2900097C17Rik	0.442058	0.784352	0.854902	0.341208	0.542407	0.307088	0.703878	0.50931		0.467223	0.461842	0.917	0.254289	0.83954	0.999	0.591994	0.787176	0.961531	0.785886	0.824273	1.0115	0.553507	0.955791	1.08463	0.690342	0.904816	1.74252	0.624261	0.908144	1.05197	0.703566	1.2264	0.941138	0.782431	0.909466	1.00476	0.871856	1.15002	1.03051	0.659565	0.651646	0.744266	0.572262	0.758629	0.831487
3010003L21Rik	0.0144591	0	0.0177198	0	0.00905112	0	0	0.00916359		0.0179154	0.0129647	0.0060632	0	0.0195746	0	0.0276976	0.0419004	0.0095331	0.0247863	0.0247729	0.014661	0.0262733	0.0235384	0.0372992	0.0133182	0.0187946	0	0.00805594	0.00911565	0.0239556	0.010323	0	0.0105017	0.00380335	0.00665412	0.00390338	0.00187008	0.0277143	0.00895807	0	0.0137264	0.0248455	0.00458641	0.0129087	0
3100002H09Rik	0.0144257	0.0354836	0	0	0.00852019	0	0	0.0228542		0.00153718	0.00692091	0	0	0.00103003	0	0.000952972	0	0	0.00173842	0.00670792	0.00238032	0.000928569	0.00100426	0	0	0.0014725	0	0	0.000991478	0	0.0038356	0	0.000377126	0	0.00237052	0.000459548	0	0	0.000929393	0	0	0	0	0.00134655	0
3110001I22Rik	0.0281146	0.0471378	0	0	0.0249679	0	0	0.0155943		0.0335548	0.0205388	0.0178407	0.0644695	0.0265005	0	0.0301625	0.0195797	0.0448661	0.028563	0.0395291	0.0213595	0.0288082	0.0200556	0	0.0521061	0.0244549	0	0.00882457	0.0226538	0.0207939	0.0150985	0.0265508	0.0229465	0.0260325	0.0113327	0.0243359	0.0225616	0	0.026158	0.0441541	0.0165886	0	0.00841588	0.0196522	0.221361
3110002H16Rik	0.275962	0.175525	0.231754	0.0624395	0.189406	0.192086	0.703878	0.242026		0.183933	0.10617	0.0928555	0.0644695	0.0903977	0.162223	0.136137	0.0863976	0.0556481	0.145127	0.125273	0.0843612	0.135554	0.0840292	0.125178	0.149241	0.142266	0	0.17213	0.100684	0.0902099	0.178241	0.150572	0.133139	0.16203	0.134167	0.127935	0.130805	0.0774208	0.10618	0.0673601	0.0463498	0.0559148	0.153374	0.090337	0
3110006O06Rik	0	0	0	0	0.00152992	0	0	0		0.000657585	0	0.00719823	0	0.00508189	0	0.000880152	0.000884219	0	0.00211158	0	0.0030443	0.000632358	0.00124061	0	0	0.00204036	0	0	0.00192396	0	0.0037068	0	0.00145047	0.00303134	0	0.00215833	0.00208598	0	0.00208231	0	0	0	0	0.00162307	0
3110009E18Rik	0.141425	0.0587763	0.130282	0	0.0788489	0	0	0.0745814		0.133041	0.0723428	0.154323	0.222051	0.0795131	0.123982	0.118073	0.0904614	0.0843121	0.065557	0.0483215	0.0806952	0.106339	0.0618918	0.151046	0.158155	0.106838	0.0945108	0.226851	0.109748	0.135303	0.194919	0	0.143893	0.184594	0.0768421	0.144593	0.169726	0.190709	0.116502	0.241196	0.101492	0.112295	0.160329	0.106589	0
3110021N24Rik	0.0328619	0	0.0908443	0.0690217	0.0250774	0	0	0.0272011		0.00799648	0.0157158	0.0319288	0	0.024851	0	0.00787119	0.0113289	0.094359	0.014031	0.0334775	0.0272126	0.0104328	0.0158855	0.0466329	0	0.0118101	0	0.0668466	0.0487808	0.0427064	0.0426045	0	0.0816131	0.0279627	0.0338541	0.0586954	0.0458753	0.0179355	0.0663678	0	0.0157642	0.0192669	0.0230497	0.0179817	0
3110035E14Rik	0	0	0	0	0.00343894	0	0	0		0.00317894	0.00112895	0.00160638	0	0	0	0.00032986	0.00137163	0	0	0	0	0	0.000447884	0	0	0.000484279	0	0	0.000756688	0	0.00373892	0	0	0.00142757	0.00407867	0.00175623	0	0	0.000129299	0	0	0.0100664	0	0.00489425	0
3110039M20Rik	0	0	0	0	0	0	0	0		0.0024647	0	0	0	0.00320084	0	0.000657723	0.00102171	0	0	0	0	0.000668471	0	0	0	0	0	0	0.00498828	0	0.0292141	0	0	0.0273795	0.00792403	0	0.00726424	0	0	0	0	0	0	0	0
3110040N11Rik	0.441242	0.368373	0.202178	0.663547	0.307907	0	0	0.343268		0.420056	0.181758	0.238296	0.546906	0.266722	0.16806	0.371077	0.273163	0.253979	0.315557	0.126804	0.296099	0.319477	0.31694	0.251847	0.398635	0.359856	0.405135	0.278467	0.267713	0.1983	0.294439	0.0474851	0.178433	0.364777	0.270013	0.219064	0.28785	0.150654	0.232085	0.217666	0.210792	0.316521	0.284217	0.257233	0.194382
3110043O21Rik	0.0507663	0.0806143	0.0572167	0.177666	0.074509	0	0	0.0703173		0.0932937	0.0457293	0.0288104	0	0.06182	0.0616101	0.0729342	0.0675993	0.0445652	0.0736452	0.0533366	0.067174	0.0600139	0.0602824	0.0374025	0.0935243	0.0714	0	0	0.0639038	0.0385763	0.0659414	0.216792	0.0610018	0.059435	0.0498698	0.0563446	0.0694156	0.0106936	0.0671077	0.0262147	0.0385895	0.0231063	0.0568656	0.0601962	0
3110045C21Rik	0.00649319	0	0	0	0.0127126	0.153544	0	0.02153		0.0241459	0.0234445	0.0108962	0.0644695	0.0152965	0	0.0273533	0.0177504	0.0160809	0.00704848	0	0.00656998	0.0120087	0.00682066	0	0.00551578	0.0104196	0	0.0161119	0.0202594	0.015191	0.0195377	0.0195937	0.0232392	0.0386565	0.0246684	0.0336721	0.0425084	0	0.0213911	0.042258	0	0.0366788	0.0404149	0.013641	0
3110062M04Rik	0.0935077	0.106084	0.12345	0.0749991	0.129767	0	0	0.170497		0.117078	0.0770156	0.0835111	0.217053	0.130982	0.151843	0.0938004	0.125226	0.118366	0.086208	0.0906482	0.112659	0.0927041	0.124486	0.137847	0.0373472	0.0974158	0.465022	0.180168	0.12858	0.120214	0.0605587	0.107071	0.0987495	0.100245	0.0872983	0.107922	0.0936612	0.181472	0.129225	0.0595458	0.265354	0.160492	0.0522222	0.100241	0.194382
3110070M22Rik	0.0306849	0.0624646	0.0723198	0	0.0132803	0	0	0.0159402		0.0241653	0.0103877	0.0159701	0.0644695	0.0285793	0	0.0322216	0.0261841	0.0446082	0.0462735	0.0371111	0.0552771	0.0408835	0.0536838	0.0227003	0.0789422	0.0577922	0.0659309	0	0.0491792	0.0104784	0.0441708	0.0959398	0.0479183	0.0430632	0.0431784	0.056283	0.0605584	0.0453093	0.0481406	0	0.045572	0.0106619	0.0138859	0.0305941	0
3110082I17Rik	0.11807	0.112972	0.0954118	0.121809	0.0944168	0.314347	0.703878	0.0529803		0.181228	0.103478	0.138303	0.329854	0.111108	0.178518	0.166735	0.151054	0.156015	0.106869	0.0469141	0.0923716	0.120654	0.0817906	0.151127	0.117598	0.120417	0	0.430256	0.120283	0.117235	0.118965	0.161607	0.131094	0.144509	0.102941	0.129057	0.181062	0.0790188	0.110876	0.313145	0.228943	0.213341	0.235173	0.130381	0.359066
3110082J24Rik	0.00105308	0	0	0	0.00269736	0	0	0.0022725		0.00478425	0.00382648	0	0.149263	0.0030957	0	0.00476589	0.0109496	0.00221682	0.0154728	0.00342242	0.0197245	0.0105405	0.0232623	0	0.0179116	0.023094	0	0	0.00503083	0	0.00265338	0.0224325	0.000703639	0.00268334	0.00712577	0.000710098	0.000919439	0	0	0	0	0	0	0.0159131	0
3222401L13Rik	0.0704489	0.0648751	0.140466	0.128259	0.0581809	0.153544	0	0.0728852		0.0576043	0.0201998	0.0880882	0	0.0411994	0	0.0493104	0.064564	0.0990967	0.0872344	0.108043	0.0879396	0.0591212	0.11996	0.0822818	0.0998506	0.103141	0.185274	0.098432	0.0990785	0.0854687	0.069108	0.0224325	0.130995	0.0884809	0.0917941	0.106002	0.0944653	0.0680546	0.115543	0.022133	0.0745147	0.0624473	0.0149528	0.0432322	0.359066
3300002I08Rik	0.0113592	0.0196919	0	0	0.0206907	0	0	0.0108374		0.0137874	0.00259524	0.0138494	0	0.0335799	0	0.00660218	0.00639301	0.0105151	0.0200445	0.0716261	0.0131248	0.00858847	0.0188339	0.0188473	0.0232493	0.0171673	0	0	0.0177409	0.00738195	0.0137226	0.0195937	0.00966867	0.013379	0.00695256	0.0123929	0.00737235	0	0.0117332	0	0	0.0099724	0.00797204	0.00922661	0
3300005D01Rik	0.0427824	0	0	0.0624395	0.0340579	0	0	0.0159697		0.10126	0.0581844	0.0399768	0	0.0127105	0	0.0547404	0.0364886	0.0293639	0.085087	0.0561922	0.0364294	0.064266	0.0436026	0.0168666	0.0718733	0.0449497	0	0.0994982	0.0289751	0	0.0304808	0	0.00593383	0.0578504	0.0770839	0.0128218	0.0351039	0.0106936	0.00556578	0.0187427	0.0236995	0.0518345	0.0707814	0.0511725	0
3425401B19Rik	0	0	0	0	0.00075726	0	0	0.00139934		0.000504612	0.00314253	0	0	0.00203299	0	0.00390602	0.00919856	0	0	0.00671508	0.00242393	0.00594417	0.00365298	0	0.0093274	0.00227827	0	0	0.00177682	0.00830973	0.00839979	0	0.00114509	0.000771479	0	0.000462524	0	0	0.000982403	0	0	0.00556654	0	0.00134383	0
3632451O06Rik	0.221886	0.160293	0.404418	0.275574	0.18258	1.88537	0	0.223665		0.138739	0.0722864	0.141164	0.0644695	0.367369	0.167564	0.129861	0.0946675	0.0960608	0.242397	0.196626	0.269149	0.162103	0.109265	0.249249	0.14657	0.177303	0.199514	0.0951886	0.245365	0.156213	0.753604	0.269931	0.316724	0.312352	0.0942594	0.108401	0.187855	0.132971	0.0614979	0.0743657	0	0.164557	0.086775	0.074858	0
3830403N18Rik	0.0234108	0.0788656	0.0645181	0	0.0317024	0	0	0.0391797		0.0305422	0.0277096	0.00989902	0	0.0308425	0.0837247	0.0366327	0.0400745	0.0755289	0.0514263	0.0302484	0.0271484	0.0654245	0.0401481	0	0.121865	0.0228918	0.570242	0.0354912	0.0486597	0.0463859	0.0386177	0	0.0356717	0.0264944	0.0530316	0.0414428	0.0368996	0.0429205	0.0288195	0	0.228016	0.047517	0.0296054	0.0557464	0
3830406C13Rik	0.620837	0.535178	0.530164	0.588603	0.519542	0.34563	0	0.670512		0.430602	0.293507	0.431217	0.504348	0.50279	0.371914	0.403702	0.412787	0.510978	0.590083	0.383685	0.501608	0.462117	0.491831	0.506935	0.586641	0.586888	0.769951	0.545425	0.590308	0.429416	0.585188	0.37068	0.467368	0.624994	0.491191	0.488077	0.580188	0.722849	0.486042	0.449862	0.578217	0.466414	0.289286	0.4595	1.00159
3830432H09Rik	0	0	0	0	0	0	0	0.00181304		0	0	0	0	0	0	0	0	0	0	0.00571706	0	0	0.00144904	0	0	0.00177913	0	0	0	0	0	0	0	0	0	0	0	0	0	0	0	0	0	0	0
3930402G23Rik	0.0251621	0.0450131	0	0	0.0233876	0	0	0.0127936		0.0738653	0.0292687	0.0542675	0	0.00798172	0.0380987	0.036451	0.0161138	0.0451992	0.00921892	0.00622481	0.012931	0.0187879	0.0076643	0	0.0387533	0.00923846	0	0.170081	0.0187833	0	0.0304556	0	0.0374682	0.0214426	0.0205025	0.00999515	0.0441053	0	0.0109551	0.0501958	0.0487339	0	0.0395233	0.0203201	0
4430402I18Rik	0.0199538	0	0.0288531	0	0.00813168	0	0	0.012776		0.00901325	0.00551703	0.0148355	0	0.00740889	0	0.00743496	0.00883064	0.0713586	0.0182999	0.0166893	0.0335174	0.0118795	0.0205383	0.0575885	0	0.0263947	0	0.0155096	0.0244728	0.0530005	0.0440715	0.0984043	0.0239833	0.0217719	0.0309018	0.0213759	0.0232299	0.0277143	0.0232611	0.0170464	0	0.0100664	0.0238263	0.00785184	0
4631405J19Rik	0.00752954	0	0	0	0	0	0	0		0.000759213	0.0010046	0.00617887	0	0	0	0.00159442	0.000344821	0.00319113	0.00122288	0	0.000563244	0.0022305	0.000126032	0	0	0	0	0	0.000493169	0.0198757	0.00095374	0	0	0	0	0.000322693	0	0	0.00104083	0	0	0	0	0	0
4631405K08Rik	0	0	0	0	0	0	0	0		0.0038937	0	0	0	0	0	0	0	0	0	0	0	0	0	0	0	0	0	0	0	0	0	0	0	0	0	0	0	0	0	0	0	0	0	0	0
4632404H12Rik	0.0154612	0.0354836	0.0243725	0	0.0120103	0	0	0.0143631		0.0068601	0.00808427	0.0482271	0	0.00554059	0	0.00663075	0.0100291	0.00372287	0.0043364	0	0.0072177	0.00546311	0.00738048	0	0.011328	0.00554876	0	0.0060885	0.0123858	0.023356	0.00859043	0	0.0102815	0.00876432	0	0.00775205	0.00550318	0	0.00907086	0	0.0095584	0	0	0.00746196	0
4632411P08Rik	0.00738579	0	0	0	0.00312212	0	0	0		0.00271133	0.00341316	0.00329854	0	0.000678998	0	0.000931969	0.0008082	0.00241607	0.0024037	0.00757055	0.00110885	0.000948633	0.00244095	0	0.0119902	0.00234844	0	0	0.00223756	0	0.00355664	0	0.00115527	0.00427799	0	0.00278343	0.00292531	0	0.00209476	0	0	0	0	0.00241748	0
4632415L05Rik	0.0883787	0.0213532	0.0858181	0	0.0838615	0.307088	0	0.0862371		0.04902	0.0497612	0.224081	0	0.0776701	0.202776	0.0513818	0.0892704	0.193725	0.0918611	0.161615	0.0981519	0.0580892	0.104051	0.159969	0.147585	0.11927	0.228711	0.0873168	0.139795	0.0856855	0.115678	0.186506	0.16139	0.107706	0.115128	0.141941	0.116951	0.112008	0.17319	0.189698	0.10616	0.117079	0.0703997	0.106458	0
4632428C04Rik	0	0	0	0	0	0	0	0.001945		0.00131381	0.000745603	0.0170629	0	0.00184057	0	0.000617373	0.000881276	0.00448626	0.00138655	0.00800348	0.00132185	0.0010077	0.00103402	0	0	0.000936274	0	0	0.00248062	0.00999763	0.000938859	0	0.00299507	0.00218485	0	0.00109819	0.00240869	0	0.00159251	0	0	0	0	0	0
4731419I09Rik	0	0	0	0	0.00168921	0	0	0		0	0	0	0	0	0	0	0	0	0	0.00482125	0	0	0.000200451	0	0	9.21397e-05	0	0	0	0	0	0	0	0	0	0	0	0	0	0	0	0	0	0	0
4732414G09Rik	0	0.0275956	0.00749664	0	0.00424161	0	0	0.00301967		0.00195825	0.0020569	0.00500015	0.136713	0.0177916	0	0.00523195	0.00991781	0.00507908	0.0203538	0.0162921	0.00933129	0.00783905	0.0211232	0	0.0215135	0.0213364	0	0	0.0220275	0.00784193	0.0116532	0	0.0138237	0.0238605	0.0195915	0.0179977	0.0157449	0.0642929	0.0120423	0	0	0	0.00763794	0.00968948	0
4732419C18Rik	0.0448988	0	0.203428	0.154816	0.0229093	0	0	0.0567619		0.012261	0	0	0	0.00252023	0	0.00316121	0.00267507	0	0.00130634	0.0157405	0.00267948	0.00237204	0.00215918	0	0	0.00164591	0	0	0.000506865	0	0.00393454	0	0.00179811	0.00181947	0	0.000177197	0.0017916	0	0.000832846	0	0	0	0	0	0
4732440D04Rik	0.0723564	0.0151676	0.11083	0	0.0349102	0	0	0.0520176		0.0330341	0.011941	0.0772158	0	0.0341479	0.0324005	0.022519	0.037068	0.0379752	0.0253237	0.0528874	0.0406748	0.0208635	0.0345021	0.0256326	0.0175463	0.0501181	0.0865179	0.0628141	0.0485503	0.0213335	0.0636514	0	0.0563778	0.0451872	0.0316716	0.0397969	0.0695107	0.04367	0.0342932	0.0247094	0	0.0381372	0.0276901	0.0243417	0
4732463B04Rik	0.00568676	0	0	0.0606767	0.00378835	0	0	0.00330898		0.00646208	0.00119809	0	0	0.000584349	0	0.00170417	0.000909946	0	0.00171653	0.00642096	0.000585354	0.0010434	0.000329889	0	0	0	0	0	0.000349736	0.00970003	0.000664374	0	0.000545001	0.00114031	0	0.000268294	0	0	0.00029271	0	0	0	0	0	0
4732465J04Rik	0	0	0	0	0	0	0	0		0.000776738	0	0	0	0	0	0.000483736	0	0	0	0	0	0.000551035	0	0	0	0	0	0	0	0	0.0024984	0	0	0.00112963	0	0	0	0	0	0	0	0	0	0	0
4732471J01Rik	0.0210976	0	0.00596745	0	0.0031826	0	0	0.00370007		0.00408367	0	0.00460066	0	0.00506921	0	0.00121664	0.000991708	0.00154765	0.000810054	0	0.00116059	0.0015	0.00111335	0	0	0.00161006	0	0	0.000775558	0	0	0	0.00365953	0.000787572	0	0.000504804	0.00107801	0	0.00132341	0	0	0	0	0	0
4732491K20Rik	0.0566104	0.0188421	0.0361505	0	0.0282389	0.153544	0	0.0266045		0.0239158	0.0337605	0.0897572	0.152583	0.0328375	0.127954	0.0305717	0.0269351	0.0658475	0.0299258	0.09994	0.0291344	0.0310384	0.0322358	0	0.0125743	0.0401933	0	0.170081	0.0528053	0.0429042	0.0668046	0.0195937	0.049227	0.063079	0.0363524	0.0590873	0.0680637	0.0788287	0.0467854	0.0745908	0.0460342	0.0507596	0.0593914	0.0367675	0
4732496C06Rik	0.00229995	0	0	0	0.00553361	0.153544	0	0		0.00389387	0.00211921	0.00332943	0	0.00757125	0	0.00736596	0.0169138	0.00542972	0.0158426	0.065065	0.0138413	0.00846644	0.00861895	0	0.0154793	0.0102977	0	0.0165893	0.00883433	0	0.00641778	0	0.0112813	0.00666894	0.00862248	0.0169014	0.0114461	0	0.0110427	0	0	0.0164249	0	0.00544207	0
4831440D22Rik	0	0	0	0	0	0	0	0		0.000151122	0.00120316	0	0	0.000720543	0	0.000329494	0.000813553	0	0.00329361	0	0.00183862	0.000945504	0.00107969	0	0	0.001384	0	0	0.000783047	0	0.00075958	0	0.000434533	0.00220646	0	0.000381267	0	0	0.000571939	0	0	0	0	0	0
4831440E17Rik	0.00809672	0	0.0195402	0	0.0104157	0	0	0.0162412		0.00298928	0	0.00539238	0	0.00361244	0	0.000818538	0.00437715	0.00808784	0.00494518	0.0215774	0.00821482	0.00168558	0.00563975	0	0	0.00849368	0	0	0.011231	0	0.0100765	0	0.0105761	0.00279846	0.0239766	0.0111749	0.00299389	0	0.0114581	0	0	0	0	0.0041	0
4833403J16Rik	0	0	0	0	0.000521341	0	0	0		0	0	0	0	0	0	0	0.000400832	0	0	0	0.00129845	0	0.000342271	0	0	4.47892e-05	0	0	0	0	0	0	0.000507059	0	0	0.000162728	0	0	0.000715705	0	0	0	0	0	0
4833407H14Rik	0.00571342	0.0188421	0	0	0.00560955	0	0	0.00440962		0.00588768	0.0040295	0	0	0	0	5.86222e-05	0.000213756	0	0	0	0	0	0	0	0	0.00011086	0	0	6.12118e-05	0	0.00127632	0	0	0	0	0	0	0	0	0	0	0	0	0	0
4833412C05Rik	0	0	0	0	0.00139972	0	0	0		0.00406687	0.00390806	0.00249675	0	0.00666331	0	0.0131635	0.0148758	0.00437907	0.020091	0.00409914	0.00389891	0.036256	0.0167921	0	0.0121666	0.0112824	0	0.0147271	0.00870335	0	0.00910604	0.0593867	0.00663395	0.00812506	0.0106025	0.00651812	0.0130346	0	0.00619516	0	0.0331665	0.0326429	0.00416782	0.0111013	0.226783
4833413G10Rik	0	0	0	0	0.00487429	0	0	0.00460629		0.00216471	0.0646162	0.0076777	0	0.0031599	0	0.00323163	0.0205231	0.00758304	0.00201983	0.00332222	0.00484342	0.00163842	0.00424662	0.0321521	0	0.00354169	0	0.0060885	0.0060768	0	0.00929942	0	0.00815951	0.00300407	0.00429475	0.00590518	0.00366599	0	0.00686967	0.0215731	0	0	0.0216291	0.00628997	0
4833418N02Rik	0.0242893	0.0195422	0.0570058	0	0.0150876	0	0	0.0228771		0.0138276	0.00513914	0.016279	0	0.03565	0	0.0193496	0.0249735	0.00691359	0.0372335	0.0561113	0.0290541	0.0239665	0.0308169	0.0381645	0.0564619	0.0340513	0	0.0077647	0.0246537	0.00749951	0.0210391	0	0.0276339	0.0190872	0.0348427	0.0254872	0.0300947	0	0.0218622	0	0	0.0136094	0.0096749	0.0105651	0
4833420G17Rik	0.332145	0.099328	0.188093	0.980817	0.340023	0.153544	0.703878	0.408186		0.282632	0.23551	0.22931	0.526673	0.283757	0.15227	0.197356	0.237038	0.400344	0.341952	0.406207	0.35758	0.239791	0.290027	0.518868	0.322216	0.29865	0.563754	0.188338	0.316353	0.283691	0.292599	0.245698	0.317405	0.249724	0.271457	0.324439	0.283295	0.294526	0.356731	0.177446	0.297689	0.298249	0.187657	0.255699	0.194382
4833422C13Rik	0.000863468	0	0	0	0.00617364	0	0	0.00411097		0.00607655	0.0080153	0.00202632	0	0.00858415	0.0837247	0.00399837	0.0128406	0.00504838	0.0133627	0.0722129	0.0155848	0.011222	0.026138	0	0	0.0173642	0	0.163934	0.0128268	0	0.00930746	0	0.00589431	0.00246027	0.00671633	0.00255541	0.00946674	0.0500408	0.0147521	0.0251487	0.0607768	0.0181855	0.00458641	0.0115646	0
4833427G06Rik	0	0	0	0	0.00410699	0	0	0.00334082		0.00385975	0	0.00764545	0	0.00778656	0	0.0100388	0.0101288	0.00187313	0.00437726	0	0.00445595	0.00999032	0.00626994	0	0.0119902	0.00680103	0	0.0152448	0.00141138	0	0.00266925	0.0602539	0.000514892	0.0033762	0	0.000965783	0.00135404	0	0.000524487	0	0	0	0.0158906	0	0
4833439L19Rik	0.48524	0.516832	0.540822	0.350499	0.303267	0.499174	1.40776	0.354392		0.295445	0.258487	0.650518	0.499433	0.359114	0.388631	0.460851	0.437463	0.740119	0.44648	0.321351	0.445515	0.41854	0.455243	0.374239	0.486267	0.585168	0.751001	0.661396	0.591996	0.61842	0.399342	0.239335	0.538181	0.694173	0.720937	0.717402	0.609539	0.646762	0.663201	0.487294	0.565177	0.690551	0.685712	0.651056	0.674928
4833445I07Rik	0.00350733	0	0.0161609	0	0.00573669	0	0	0.00173391		0.00890139	0.00352081	0.00217594	0	0.00611796	0	0.00684978	0.00343526	0.00662795	0.00854867	0.00436567	0.00422403	0.00879085	0.0070445	0	0	0.00997192	0	0	0.00559181	0.0125719	0.00523826	0	0.00536282	0.00426532	0.00236294	0.00712092	0.00274787	0	0.00630883	0	0	0.0321659	0	0.0185404	0
4921504A21Rik	0.0149108	0.0237715	0.0380543	0	0.0177758	0	0	0.0172085		0.0158536	0.0145964	0.0161153	0	0.0309193	0.0324005	0.00833606	0.00756695	0.0307326	0.0178589	0.0560461	0.0295196	0.010853	0.0172332	0.0220323	0	0.0183956	0	0.0510461	0.0284414	0.0314446	0.0317094	0.0250197	0.0307936	0.0262258	0.0264621	0.0252406	0.022468	0	0.0295993	0.0235098	0.011108	0.0183938	0.00763794	0.00993644	0
4921507P07Rik	0	0	0.00757469	0	0.00153081	0	0	0.00647466		0	0	0	0	0.00125312	0	0	0.000267136	0.00606672	0	0	0.000940482	0	0.00106344	0	0	0.000466183	0	0	0.000500139	0	0	0	0.00160116	0	0	0.00057587	0	0	0.000138936	0	0	0	0	0	0
4921508D12Rik	0	0	0	0	0.00153659	0	0	0		0.00323496	0	0	0	0.000654255	0	0.00228929	0.00124493	0	0.00197093	0	0.00209151	0.00144792	0.00150526	0	0	0.000644018	0	0.0152448	0.000432186	0	0.000434942	0	0.000761397	0	0	0	0.000864488	0	0.00123267	0	0	0	0	0	0
4921509A06Rik	0	0	0	0	0.00117168	0	0	0		0	0	0	0	0.00131201	0	0	0.00066554	0	0	0	0	0	0.000510398	0	0	0.000500889	0	0	0.00025563	0	0	0	0	0	0	0	0	0	0	0	0	0	0	0.000706764	0
4921514A10Rik	0	0	0	0	0	0	0	0		0	0.00302955	0	0	0.000786846	0	0	0.000243354	0	0	0	0	0	0.000296562	0	0	0	0	0	0.000190064	0	0	0	0	0	0	0	0	0	0	0	0	0	0	0	0
4921516A02Rik	0	0	0	0	0	0	0	0		0	0	0	0	0	0	0	0	0.00451212	0	0	0.00271494	0	0.000810088	0	0	0.000789564	0	0	0.00141364	0	0	0	0.00111223	0	0	0.00258107	0	0	0.00145637	0	0	0	0	0	0
4921524J17Rik	0.47067	0.399347	0.401555	0.301769	0.375833	0	0	0.492089		0.483773	0.394776	0.549589	0.902902	0.280359	0.392028	0.423934	0.383281	0.334736	0.371587	0.344126	0.282572	0.431804	0.322973	0.31505	0.372451	0.443196	0.579542	0.586818	0.364211	0.303187	0.365765	0.624233	0.310513	0.360488	0.35849	0.296128	0.382827	0.321246	0.314676	0.748039	0.828039	0.565397	0.631913	0.60809	0.642527
4921536K21Rik	0	0	0	0	0	0	0	0		0	0.00168337	0	0	0.00105958	0	0	0.00160034	0.00224764	0	0.00219608	0	0	0.000776553	0	0	0.000445777	0	0	0.000742791	0	0	0	0.00116231	0	0.00182932	0.000770614	0	0	0.00121268	0	0	0	0	0.00184397	0
4921539H07Rik	0	0	0	0	0.00107752	0	0	0		0	0	0	0	0	0	0	0.000250454	0	0	0	0	0	0.00039859	0	0	0.00018965	0	0	0	0	0	0	0	0	0	0	0	0	0	0	0	0	0	0.00114673	0
4930402H24Rik	0.156763	0.188741	0.2326	0.128259	0.178052	0.153544	0.703878	0.195918		0.135303	0.133233	0.307442	0.136713	0.252256	0.229644	0.154674	0.238556	0.231919	0.308491	0.640144	0.415485	0.195484	0.401779	0.208227	0.171882	0.36227	0.241235	0.111406	0.304562	0.207009	0.216568	0.467106	0.238176	0.225611	0.371813	0.249605	0.195747	0.303341	0.262248	0.485137	0.52295	0.198282	0.169042	0.36902	0.807211
4930403P22Rik	0	0	0	0	0.000913383	0	0	0		0.00153922	0.00245966	0.00935188	0	0.00423284	0	0.00134711	0.000889811	0.00628179	0	0.0319491	0.00380522	0.000758086	0.00232054	0	0	0.00242939	0	0	0.00274715	0.00923491	0.00129395	0	0.00323739	0.000157257	0	0.00317535	0.000609683	0	0.00210227	0.0545986	0	0	0	0.00309892	0
4930404H11Rik	0	0	0	0	0.00273809	0.153544	0	0.00355782		0.0017323	0.0141734	0.00659242	0	0.00856986	0.19488	0.00237497	0.003715	0.00979964	0.0221014	0	0.0227176	0.00469253	0.0087182	0.0271084	0.0187002	0.010062	0.123553	0	0.0441858	0.0443349	0.0906597	0.0880248	0.0750046	0.0586258	0.0432785	0.080607	0.0334283	0	0.0555887	0	0	0.0148407	0.0175774	0.0046943	0
4930404N11Rik	0.113498	0.107779	0.121083	0	0.0585285	0	0	0.191537		0.0198111	0.037478	0.0172766	0	0.00632372	0	0.0071373	0.00809296	0.00178746	0.00263242	0.0361561	0.0137598	0.00707274	0.00645167	0	0	0.00518031	0	0	0.00571273	0	0.00813139	0	0.0106126	0.00628186	0.00353048	0.00938754	0.00447857	0.0243202	0.00868539	0	0	0.0299003	0.0191193	0.00663235	0
4930407G08Rik	0	0	0	0	0.000363751	0	0	0		0	0	0	0	0	0	0	0	0	0	0	0	0	0.000324182	0	0	0.000277298	0	0	0.000628613	0	0	0	0	0	0	0	0	0	0	0	0	0	0	0.00104752	0
4930412M03Rik	0	0	0.00694607	0	0.00202224	0	0	0		0.00105282	0	0	0	0.00249426	0	0	0.00372163	0.0016297	0	0.0103357	0.00052771	0.000699082	0.00067366	0.0382494	0	0.000763632	0	0	0.00110314	0	0	0	0.000502855	0	0.00158469	0.00142182	0.00514626	0	0.00272961	0	0	0	0	0.00173338	0
4930415O20Rik	0	0	0	0	0.00149127	0	0	0.00445113		0.000946607	0.0010093	0	0	0	0	0.000684902	0	0	0.00339027	0	0	0.000723082	0.00026079	0	0.0103239	0.000263282	0	0	0.000306293	0	0	0	0	0	0	0	0	0	0	0	0	0	0	0.00223012	0
4930425P05Rik	0	0	0	0	0.00398131	0	0	0.00302863		0.00263088	0	0.00157241	0	0.0130293	0	0.000477331	0.000966209	0	0.00138456	0	0.00227181	0	0.000134364	0	0	0.000126291	0	0	0.00435623	0.022129	0.0146367	0	0.0103758	0.0121628	0.0017756	0.0109145	0.0114737	0	0.00869506	0	0	0	0	0	0
4930426I24Rik	0.00575051	0	0.00731809	0	0.0059462	0	0	0.0147598		0.00519632	0.00182081	0	0	0.0119657	0	0.00130276	0.00189878	0.00148134	0.0053432	0	0.00612262	0.0023508	0.00575397	0	0.00724016	0.00657336	0	0.0231075	0.00472574	0.0110528	0.0101576	0	0.014078	0.00393902	0	0.00976463	0.00634903	0	0.00721975	0	0	0	0	0.00312224	0
4930426L09Rik	0.0058802	0	0.00816971	0	0.00337811	0	0	0		0.00408951	0.00292123	0.0016392	0	0.000657797	0	0.00980103	0.0107253	0.0192491	0.000775564	0.00495195	0.00176074	0.0073929	0.00689884	0	0	0.00508565	0	0.0231075	0.00433054	0.00830973	0.00616576	0	0.00381823	0.00330844	0.00466232	0.00589676	0.0105975	0	0.00641945	0	0	0.0071676	0.0257001	0.00873354	0
4930429F24Rik	0	0	0	0	0.000833972	0	0	0		0	0	0	0	0.00154942	0	0	0.000612868	0	0	0	0	0	0.000614618	0	0	0.00104095	0	0	0.00135617	0	0	0	0	0	0	0	0	0	0	0	0	0	0	0	0
4930430F08Rik	0.0781831	0.0401953	0.0556463	0.0489541	0.0589408	0	0	0.0590238		0.0592435	0.0318855	0.153887	0	0.0305136	0.118696	0.0574687	0.0545628	0.0775707	0.0514832	0.112542	0.0464621	0.0642567	0.049503	0.0699466	0.0268125	0.0686051	0.0845409	0.18071	0.075348	0.101103	0.112366	0.0278914	0.0999102	0.0772454	0.0833855	0.0894153	0.110729	0.0962101	0.0924572	0.234412	0.0945665	0.0789331	0.0939523	0.0534765	0
4930431P22Rik	0.00119473	0	0	0.0489541	0.000834025	0	0	0.00327475		0.0045182	0.00130675	0	0	0.00310589	0	0.00131643	0	0	0.00142113	0	0	0	0.000444531	0	0	0.000214208	0	0	0.00043176	0	0.00210007	0	0	0	0	0	0	0	0	0	0	0	0	0.000873745	0
4930432K21Rik	0	0	0	0	0.00478096	0	0	0.001423		0.00424663	0.00279278	0	0	0.00297651	0	0.00239373	0.00330092	0.00262457	0.00288485	0.00713046	0.00477035	0.00221555	0.00514537	0	0.0200117	0.00485189	0	0	0.00274916	0	0.00106235	0	0.00642518	0.0040744	0.00395277	0.00381126	0.00122368	0.0261055	0.00432806	0.0247094	0	0.00949689	0	0.00419932	0
4930438A08Rik	0	0	0	0	0.000869771	0	0	0		0	0	0	0	0.00418825	0	0	0.000372443	0	0	0	0	0	9.47584e-05	0	0	0	0	0	0.000711385	0	0	0	0	0	0	0	0	0	0	0	0	0	0	0	0
4930444M15Rik	0	0	0	0	0.000363751	0	0	0		0.00226893	0.00382114	0	0	0.000736421	0	0.00111902	0.00371632	0	0	0	0	0	0.000842665	0	0	0.000402879	0	0	0	0	0	0	0	0	0.00294408	0	0	0	0	0	0	0	0	0	0
4930444P10Rik	0.0078036	0	0	0	0.00349316	0	0	0.00719875		0.00490189	0.00450028	0	0	0.000568392	0	0.00423629	0.00479285	0.00201001	0.00469267	0.000832118	0.00151397	0.00455221	0.00117401	0	0	0.000884676	0	0	0.00113968	0	0.000614628	0	0.000387273	0.00172607	0	0.00159264	0.00115341	0	0.000613042	0	0.0095584	0	0	0.00194183	0
4930445N18Rik	0.00109921	0	0	0	0.00188467	0	0	0.00307694		0.00415258	0	0	0	0	0	0.000744951	0.000465521	0	0.0023681	0	0	0.00137139	0.000299651	0	0	0.000648201	0	0	0.000655168	0	0	0	0	0	0	0	0.0018788	0	0	0	0	0	0	0.00296574	0
4930447C04Rik	0.00105308	0	0	0	0.00623666	0	0	0.00288119		0.00634686	0.00318737	0.00116488	0	0.0346844	0	0.0245396	0.0196596	0.0367588	0.0046066	0.0048143	0.00901953	0.0129377	0.00888339	0.0180553	0.0181758	0.00453141	0	0	0.0087758	0.00729052	0.0193108	0	0.0103631	0.00779042	0	0.00442976	0.0095965	0	0.00740596	0	0	0	0	0.00454682	0
4930447M23Rik	0	0	0	0	0	0	0	0		0	0	0	0	0	0	0	0	0	0	0	0	0	0.000547975	0	0	0.000614813	0	0	0.000523291	0	0	0	0	0	0	0	0	0	0	0	0	0	0	0	0
4930452B06Rik	0.0120691	0	0.0385392	0.0606767	0.0031897	0	0	0		0.011528	0.0145523	0.00660537	0	0.00086064	0	0.00935097	0.0125103	0.00164859	0.0045068	0.00321034	0.00201907	0.00432619	0.00185824	0	0	0.00125139	0	0	0.000453884	0	0.00423017	0	0	0.00436045	0	0.00061379	0.00151488	0	0	0	0	0.0311938	0.00629524	0.0133017	0
4930453N24Rik	0.342679	0.326051	0.247038	0.193901	0.271548	0.153544	0	0.247809		0.321597	0.255697	0.471687	0.0525547	0.294033	0.41989	0.373107	0.373359	0.353748	0.422096	0.165365	0.326736	0.340999	0.343654	0.306601	0.362071	0.36461	0.439178	0.369475	0.385978	0.460763	0.276761	0.155355	0.371366	0.365244	0.424027	0.375852	0.369159	0.327776	0.40727	0.616821	0.333372	0.456157	0.402359	0.471027	0.503651
4930455G09Rik	0.00808697	0.0404113	0	0	0.00648129	0	0	0.0109542		0.00790007	0.0050971	0	0	0	0	0.000718345	0.000679704	0	0	0	0	0	0.000303466	0	0	0.000235645	0	0	0	0	0	0	0	0	0	0	0	0	0	0	0	0	0	0	0
4930458D05Rik	0.0311822	0.0151676	0.0444618	0	0.0188785	0	0	0.0389021		0.00607044	0.0147711	0.00788849	0	0.00572759	0	0.00271152	0.00799937	0.053052	0.00484172	0.0177764	0.00904397	0.00866853	0.00630638	0.048288	0.0317078	0.00589172	0	0.00614628	0.0112239	0.00962583	0.0170636	0	0.0152908	0.00887179	0.0100632	0.0274003	0.0108252	0.0361808	0.0210056	0	0	0	0	0.000684856	0
4930461G14Rik	0.00164564	0	0	0	0.00154034	0	0	0		0.0108499	0.00845344	0	0	0	0	0.000706234	0.000797938	0	0	0	0	0.000570525	0	0	0	0.000165103	0	0	0.000391082	0	0.00033591	0	0	0.000218105	0.00164079	0	0	0	0	0	0	0	0	0	0
4930463O16Rik	0	0	0	0	0.000753683	0	0	0		0.00144038	0.00110481	0.00171182	0	0	0	0.000466474	0.00226587	0	0	0	0.00057722	0.000555949	0.00138109	0	0	0.00194822	0	0	0.00142486	0	0	0	0.00175648	0.000859798	0	0.00122813	0	0	0.000421354	0	0	0	0	0.000665738	0
4930471E19Rik	0	0	0	0	0	0	0	0		0.00666931	0	0	0	0	0	0.00126335	0	0	0	0	0	0.000385853	0	0	0	0	0	0	0	0	0	0	0	0	0	0	0	0	0	0	0	0	0.00629843	0	0
4930480K23Rik	0.00309896	0	0	0	0.00309734	0	0	0.00740601		0.00209502	0.00138939	0.00674232	0	0.00520069	0	0.000255788	0.00135784	0	0.00492868	0.0149177	0.00362534	0.000747532	0.00280253	0	0	0.00308714	0	0	0.00448473	0	0.0012595	0	0.00299612	0.00177094	0	0.00329337	0.0016102	0	0.00389691	0	0	0	0	0.000618337	0
4930481A15Rik	0.0425465	0	0.267078	0.131461	0.0666918	0	0	0.0547444		0.0388727	0.0552114	0.0418907	0.149263	0.072367	0.151843	0.0193397	0.0274519	0.157958	0.0691675	0.0223511	0.073112	0.0246404	0.0525931	0.141043	0.0180592	0.0619844	0	0.108738	0.0714033	0.136055	0.141258	0	0.141955	0.0572775	0.0475182	0.0814365	0.080756	0	0.121431	0.0251487	0.0250344	0.048637	0	0.0204029	0.359066
4930488L21Rik	0	0	0	0	0	0	0	0		0.000129285	0	0.00600986	0	0	0	0.000455981	0	0	0	0.000798765	0.00151257	0	0.000650906	0	0.00551578	0.00182216	0	0	0.00259528	0.0139405	0.00743926	0	0.00361539	0.00062638	0.00568446	0.00243218	0.00218375	0	0.00189852	0	0	0.0071676	0	0	0
4930500F10Rik	0	0	0.00548379	0	0.00388909	0	0	0.00334941		0.0015888	0	0.00701952	0	0.00154367	0	0.00136208	0.0015675	0	0.00254026	0	0.00247643	0.00182366	0.0007233	0	0	0.0013885	0	0	0.00186816	0.0199912	0.00253064	0	0.00173675	0.00623206	0.00113667	0.00371469	0.0011478	0	0.00318875	0	0	0	0	0.00447357	0
4930500M09Rik	0.0050579	0	0	0	0.00134187	0	0	0.00392017		0.00127474	0	0	0	0.000380344	0	0.000516821	0.000983922	0	0	0	0	0	0.00133236	0	0	0.000491797	0	0	0.00115572	0	0	0	0.000692892	0	0	0.000560849	0	0	0.00160274	0	0	0	0	0	0
4930502E18Rik	0.0271531	0	0.0251647	0	0.0148844	0	0	0.0224202		0.0404092	0.00411731	0.0456871	0	0.00117916	0	0.00797657	0.0012518	0	0.00157616	0.00398927	0	0.00516382	0.00148297	0	0.00445828	0.00157583	0	0	0.000700265	0	0.00404246	0	0.000749451	0.000509518	0	0.000644644	0.000195756	0	0.000307566	0.039988	0	0	0	0.000375355	0
4930503B20Rik	0	0	0	0	0	0	0	0		0.000154527	0	0	0	0	0	0.0016104	0	0	0	0	0	0	0	0	0	0	0	0	0	0	0	0	0	0.000259893	0	0	0	0	0	0	0	0	0	0	0
4930503L19Rik	0.0271033	0.0958516	0.0499892	0	0.0458826	0	0	0.0431236		0.0763018	0.0885728	0.123678	0	0.0691429	0.142392	0.122626	0.149194	0.0974184	0.091997	0.120265	0.0912854	0.0747982	0.0784814	0.0212979	0.121089	0.102779	0.16826	0.410927	0.112271	0.0750207	0.0850251	0	0.094749	0.115539	0.102732	0.108565	0.115818	0	0.113562	0.394163	0.350033	0.39807	0.294322	0.307904	0.698034
4930505A04Rik	0	0	0	0	0.00240356	0	0	0.00164176		0.00134682	0.00151798	0.00226723	0	0.00335049	0	0.000406717	0.000591165	0	0.00107038	0.00104218	0.00159129	0.000487387	0.00141054	0	0	0.000902247	0	0	0.00128716	0	0.000409281	0	0.00106514	0.000710174	0.00547912	0.00145804	0.00137216	0	0.00127494	0	0	0	0	0.000666883	0
4930505N22Rik	0	0	0	0	0	0	0	0		0	0	0.00224844	0	0.00252758	0	0	0.00112608	0	0	0	0.000732983	0	0.000926573	0	0	0.000536787	0	0	0.00151308	0	0	0	0.000329399	0	0.00306104	0.000266674	0	0	0.000731926	0	0	0	0	0.0003536	0
4930507D05Rik	0	0	0	0	0.00200619	0	0	0.00338952		0.00813472	0.00158586	0	0	0	0	0.000990407	0.00033248	0	0.00179038	0	0	0.00141076	0.00160638	0	0	0.00115487	0	0	0.00193517	0	0.00220595	0	0	0	0	0	0.00205575	0	0	0	0	0	0	0.00256873	0
4930509E16Rik	0	0	0	0	0.000506922	0	0	0		0.000555286	0	0	0	0	0	0.000443369	0.00026447	0.00144821	0	0	0	0.000619802	0.000508153	0	0	0.00067989	0	0	0.00109338	0	0.00132141	0	0.00108804	0.00132153	0	0.000868583	0	0	0.00037838	0	0	0	0	0.00138765	0
4930509G22Rik	0	0	0	0	0.00158408	0	0	0.00264813		0.00221718	0.0039458	0	0	0.00475141	0	0.00336947	0.00264854	0.00182907	0.00299116	0.00162148	0.00462568	0.00240359	0.004182	0	0	0.00381265	0	0	0.00247606	0	0.000589048	0	0.000302519	0.00278348	0.00912646	0.00135783	0.00152473	0	0.0011502	0	0	0	0	0.00564517	0
4930513D17Rik	0.00423829	0	0	0	0.00141349	0	0	0		0.000746411	0	0	0	0	0	0.000642884	0.000281519	0.00295294	0	0	0.000522594	0	0.000105803	0	0	0	0	0	0.000903462	0	0	0	0.00157696	0.000157257	0.00662787	0.00199691	0	0	0.000543371	0	0	0.0148407	0	0	0
4930513N10Rik	0.0216179	0.0216064	0	0	0.00763653	0	0	0.00804581		0.00953235	0.00564972	0.00382553	0	0.00621113	0	0.0054055	0.0134818	0.000951595	0.00271957	0.0159729	0.00462585	0.00802795	0.00563179	0	0	0.00478716	0	0	0.00515888	0.00949931	0.00620471	0	0.000959105	0.00506791	0.00166541	0.00205217	0.00228825	0	0.00184447	0	0	0	0.0280515	0.00362964	0
4930515G01Rik	0.0190823	0	0.0172341	0	0.0118856	0	0	0.013862		0.0097398	0.0100109	0.0129415	0	0.00695219	0	0.0129172	0.00954307	0.0195618	0.0155248	0.0040598	0.00550282	0.0186838	0.0113455	0	0.0211109	0.0123696	0	0	0.0100153	0	0.00468339	0	0.00562151	0.00886804	0.00118059	0.00662509	0.00651688	0	0.00652755	0	0	0	0	0.00749677	0.221361
4930518I15Rik	0.00546733	0	0	0	0.00677164	0	0	0.0203081		0.00542432	0.00394422	0.0062568	0	0.00521008	0.0380987	0.00463161	0.00801871	0.0130876	0.00496809	0.0306942	0.0135481	0.00532534	0.0106597	0	0	0.0086632	0	0.0358012	0.01291	0.013354	0.0165732	0.140519	0.0160831	0.00945084	0.00366478	0.0129634	0.00719152	0	0.0151615	0	0.0377854	0.0465526	0	0.00530773	0
4930522L14Rik	0.0864115	0.0608048	0.0381066	0.138043	0.0670457	0.153544	0	0.0738895		0.0787604	0.0308117	0.038385	0.0644695	0.0771644	0.216047	0.056342	0.0566973	0.0392083	0.0468583	0.00182663	0.0369561	0.0498621	0.0369552	0.0188473	0.0493669	0.0476374	0	0.0594899	0.0469583	0.0195245	0.0522733	0.107071	0.0416219	0.0591859	0.0161346	0.0434148	0.0694406	0	0.0372565	0.202475	0.0183453	0.0918304	0.141024	0.0771919	0
4930522O17Rik	0	0	0	0	0	0	0	0		0	0	0	0	0	0	0	0	0	0	0	0	0	0	0	0	0	0	0	0	0	0	0	0.00037452	0	0	0	0	0	0	0	0	0	0	0	0
4930523C07Rik	0.184212	0.200486	0.767777	0.218594	0.302533	0.314347	0	0.170094		0.234534	0.272856	0.810384	0.329854	0.487422	0.735191	0.33029	0.529849	0.898203	0.844241	1.24105	0.647361	0.519749	0.948418	0.453828	0.694408	1.0288	0.318666	0.639699	0.747803	0.786542	1.01247	0.556286	0.973569	0.677801	0.85796	1.01732	0.704491	0.711918	0.777292	0.428377	0.543274	0.744137	0.433432	0.601717	0.553449
4930524B15Rik	0.00696741	0	0	0	0.00114452	0	0	0.00620792		0.00133933	0	0	0	0	0	0.000442075	0	0	0	0	0	0	0.000256821	0	0	0	0	0	0	0	0	0	0	0	0	0	0	0	0	0	0	0	0	0	0
4930524J08Rik	0.0149633	0	0.0079751	0	0.0295432	0.192086	0	0.0157296		0.0278973	0.0261252	0.00799319	0	0.0109029	0	0.0281898	0.0281045	0.0111661	0.0166431	0.0196333	0.0148339	0.0139201	0.0194701	0.0277856	0.0129927	0.0163949	0	0.0246966	0.0176223	0.018956	0.00718159	0	0.00948628	0.0115388	0.0121577	0.00842157	0.0186366	0	0.00702541	0	0	0.0152767	0.0386391	0.0614912	0
4930524O07Rik	0.00540233	0	0	0	0.0023795	0	0	0.00289996		0.00409821	0.00195218	0	0	0.00230382	0	0.00353036	0.0031295	0.00664561	0.00124369	0.000734051	0.00502723	0.0030261	0.00349666	0	0	0.00256823	0	0	0.00217884	0	0.0102991	0	0.00140984	0.00243422	0.00103525	0.00127557	0.00257934	0	0.00159583	0.0463371	0	0	0.00629843	0.00357826	0
4930525G20Rik	0.00812373	0	0.049244	0	0.00272318	0	0	0.00454789		0.00282248	0	0.00289853	0	0.00669458	0	0.00105376	0.000815801	0	0.00191687	0	0.00308127	0.00164462	0.00325177	0	0	0.00137375	0	0	0.000967197	0	0.00343945	0	0.00123211	0	0.00469477	0.00125965	0	0	0.00237644	0	0	0	0	0	0
4930528G23Rik	0	0	0	0	0	0	0	0		0.000978646	0	0	0	0	0	0.00126498	0	0	0	0	0	0.000643895	0	0	0	0	0	0	0	0	0.000249301	0	0	0	0	0	0	0	0	0	0	0	0	0	0
4930532G15Rik	0.00661537	0.0275956	0.0660807	0	0.0185329	0	0	0.0227418		0.0177512	0.0278836	0.0625598	0	0.0239571	0	0.00896631	0.012636	0.00355766	0.00963968	0.000798765	0.0134944	0.00689624	0.00908068	0	0	0.0133635	0	0.00863856	0.0153143	0.0361793	0.0288522	0.0692962	0.0249381	0.00781662	0.00958315	0.0116101	0.00873814	0.0518454	0.0160576	0	0.043814	0.0194573	0.00829939	0.0202138	0.221361
4930533K18Rik	0	0	0	0	0	0	0	0		0.00129334	0.00110481	0	0	0	0	0.000556322	0.000335192	0	0	0	0.00371847	0	0.000654776	0	0	0.000656007	0	0	0.000656763	0	0	0	0.00116191	0.00126579	0.00478247	0.000389187	0.00360621	0.018953	0.000496561	0	0	0	0	0	0
4930535E02Rik	0	0	0	0	0	0	0	0		0.000635002	0	0	0	0	0	0.000509232	0	0	0	0	0	0.000358753	0	0	0.0104338	0	0	0	0	0	0.00195756	0	0	0	0	0	0	0	0	0.0340745	0	0	0	0	0
4930537H20Rik	0	0	0	0	0.000649317	0	0	0		0.000311914	0.00176059	0.0449843	0	0	0	0.000715545	0.00160295	0	0.00312195	0	0	0	0.000640042	0	0	0.000450911	0	0	0.000398251	0.00830973	0	0	0.00107658	0.00157684	0	0.000564835	0	0	0.000597289	0	0	0	0	0.00374296	0
4930539E08Rik	0.00230377	0	0	0	0	0	0	0		0.00164385	0	0	0	0.00808196	0	0.00112796	0.00145271	0.00182907	0.0022307	0.0113794	0.000538696	0.00108077	0.00171735	0	0	0.00104012	0	0	0.00115513	0	0	0.140519	0.00210352	0.00185308	0.00190028	0.00199627	0.00189451	0	0.00157941	0	0	0.0148407	0	0	0
4930539J05Rik	0.00464196	0	0.0229854	0	0.00811287	0	0	0.0137997		0.00507615	0.00101153	0	0	0.00367629	0	0.0028801	0.0052203	0.00314943	0.0101196	0.00848311	0.0194765	0.00488505	0.0149546	0	0	0.00999715	0	0	0.00935152	0.0129581	0.00910834	0	0.00800096	0.00627427	0.00276088	0.00648609	0.00768012	0	0.0136021	0	0	0.0196215	0.00708719	0.00397067	0
4930540M05Rik	0.00433005	0	0	0	0.00240101	0	0	0		0.0026717	0.0020338	0	0	0.00254983	0	0.00183872	0.00315633	0.00161541	0.00799138	0	0.00186596	0.00162329	0.00218264	0	0	0.00262199	0	0	0.00251381	0	0.00346942	0	0.00152093	0.00360575	0	0.00188205	0.000971259	0	0.00109919	0	0	0	0	0.00757796	0
4930544M13Rik	0	0	0	0	0	0	0	0		0.000893207	0.00333327	0	0	0.00916079	0	0.00236643	0.00118444	0	0	0	0	0.000328481	0.000517348	0	0	0.00117726	0	0	0	0	0.00245933	0	0	0	0	0	0.000822546	0	0	0	0	0	0	0.000723048	0
4930546K05Rik	0	0	0	0	0.000301572	0	0	0.00695496		0	0.00179565	0	0	0.00115581	0	0	0.000288727	0	0	0	0	0	0.000225785	0	0	0.000178021	0	0	0.000633255	0	0	0	0	0	0	0	0	0	0	0	0	0	0	0	0
4930548H24Rik	0	0	0	0	0.000294446	0	0	0		0.000983058	0.00108676	0.00221981	0	0.000947756	0	0.00179093	0.0013394	0	0	0	0.000961598	0.000332688	0.000826358	0	0	0.000813813	0	0	0.000443697	0	0.000694365	0	0.00102793	0	0.00222561	0.000497572	0	0	0.000872443	0	0	0	0	0.000657867	0
4930550C14Rik	0.0355407	0	0.0262677	0	0.0587353	0	0	0.0242437		0.0225759	0.0113193	0.050833	0	0.0261279	0.084104	0.0160535	0.0112734	0.00906538	0.0293895	0.0258021	0.0255165	0.0128206	0.0182521	0.0438988	0	0.0232871	0.123553	0	0.0199946	0.0114678	0.0356304	0.0224325	0.0236483	0.0223117	0.0193451	0.0233699	0.0480361	0	0.0155162	0.03202	0	0	0.0242965	0.00710585	0
4930553P18Rik	0	0	0	0	0	0	0	0.00546692		0	0.00151156	0.00418242	0	0.00181517	0	0	0.00179013	0	0	0	0.00228638	0	0.000488301	0	0	0.000741308	0	0	0.000807556	0	0	0.0182256	0.00101067	0	0	0.00187696	0	0	0.00100445	0	0	0.0100664	0	0.000594717	0
4930555A03Rik	0	0	0	0	0	0	0	0		0.000489572	0.00128819	0	0	0.000877455	0	0.000132473	0.000415942	0.00404585	0.001185	0	0.000648344	0	0.0014311	0	0	0.00121417	0	0.0150141	0.0033622	0	0.00221059	0	0.000951914	0.00191233	0.00235575	0.00202803	0.00452269	0	0.001869	0	0	0	0	0	0
4930557J02Rik	0	0	0	0	0	0	0	0		0	0	0	0	0	0	0	0	0	0	0	0	0	0.000721572	0	0	0.000806204	0	0	0	0	0	0	0	0	0	0	0	0	0	0	0	0	0	0.00303372	0
4930558J18Rik	0.00345872	0.0519415	0	0	0.00265037	0	0	0.00441721		0.00994578	0.00691698	0.00177252	0	0	0	0.016412	0.016031	0.000880664	0	0	0	0.000946796	0.00057029	0	0	0.00196256	0	0.00927334	0.00162076	0	0.000594894	0	0	0.0028462	0.0012307	0	0.00125558	0	0	0.08538	0.0632935	0.0839017	0.0872293	0.0912426	0
4930558K02Rik	0	0	0	0	0	0	0	0.0015525		0	0	0	0	0	0	0	0	0	0	0	0	0	0.000477967	0	0	0.000693221	0	0	0.000491933	0	0	0	0.00128299	0	0	0.000372817	0	0	0.000580265	0	0	0	0	0	0
4930562A09Rik	0	0	0	0	0.00120174	0	0	0.00151979		0.00114612	0	0	0.0525547	0	0	0.000446474	0	0	0	0.00104218	0	0.000305309	0.000142867	0	0.00649633	0.000239519	0	0	0.000177728	0	0	0	0	0	0	0	0	0	0	0	0	0	0	0	0
4930562C15Rik	0	0	0	0	0.00143216	0	0	0		0	0	0.00193555	0	0	0	0	0.000237031	0	0	0	0.00136617	0	0.000399262	0	0	0.000368031	0	0	0.00126939	0	0	0	0.00132665	0	0	0.000152133	0	0	0.00173493	0	0	0	0	0	0
4930562D21Rik	0	0	0	0	0.000401827	0	0	0		0.000468787	0.0025896	0	0	0.0022865	0	0.000990973	0.00270882	0	0	0.00436567	0	0.00131456	0.00292673	0	0	0.000544302	0	0	0.000105308	0	0	0	0	0	0.00198165	0	0	0	0	0	0	0	0.013442	0.00041533	0
4930562F07Rik	0	0	0	0	0.00489793	0	0	0		0.0041072	0	0	0	0.00624226	0	0.00286531	0.000624565	0	0.0014497	0.00341804	0.000604008	0.00471573	0.00139919	0	0	0.00188798	0	0	0.000392582	0	0.00339546	0	0.00287353	0	0	0.000351352	0.00173145	0	0.00138218	0	0	0	0	0.00216177	0
4930563E18Rik	0	0	0	0	0.000304533	0	0	0		0	0	0	0	0	0	0	0	0	0	0	0	0	0.000607531	0	0	0	0	0	0.000542482	0	0	0	0	0	0	0	0	0	0	0	0	0	0	0	0
4930565N06Rik	0	0	0	0	0	0	0	0		0	0.00141779	0	0	0	0	0	0	0	0	0	0	0	0.000557157	0	0	0	0	0	0.000662929	0	0	0	0	0	0	0	0	0	0	0	0	0	0	0.000782655	0
4930567K12Rik	0.00197044	0	0	0	0	0	0	0.00522261		0.0018687	0	0	0	0.000935369	0	0.0010667	0	0	0	0	0	0.00055033	0.000719343	0	0	0.000515262	0	0	0.000151474	0	0.00100972	0	0	0.00149523	0	0	0	0	0	0	0	0	0	0.000966021	0
4930568A12Rik	0	0	0	0.128259	0.00430651	0	0	0.00595351		0.00396425	0.00434519	0	0	0	0	0.00199484	0.00201722	0.00476683	0	0	0	0.00105647	0.00182164	0	0.00729163	0.00110882	0	0	0.00237396	0	0	0	0.00189716	0.00421971	0.00246036	0.00217371	0.000221088	0	0.00149148	0	0	0	0	0.000977889	0
4930570G19Rik	0	0.0239798	0.00965016	0	0.00345647	0	0	0.00336195		0.00120858	0.00704131	0.00645403	0	0.00761505	0	0.00366371	0.00539185	0.0455507	0.0184133	0.00926687	0.0265891	0.00381943	0.0215454	0.0277856	0	0.026378	0	0	0.0278957	0.0158289	0.0341527	0	0.0416245	0.0224814	0.017765	0.0268433	0.0227012	0.0228365	0.0367463	0.0197153	0	0	0.00829939	0.00916998	0
4930572G02Rik	0	0	0	0	0.000397157	0	0	0		0.000661398	0	0	0	0	0	0.000439576	0.00113432	0	0.00354078	0.0363273	0.00101999	0	0.000290322	0	0	0.000831079	0	0	0.00105025	0	0.00267179	0	0.00178425	0.000825077	0	0.00175469	0	0	0.00168654	0	0	0	0	0	0
4930573C15Rik	0.010397	0	0	0	0.00222964	0	0	0.00271126		0.00276894	0	0	0	0.000628669	0	0.00363911	0.00280199	0	0.00192751	0	0	0.00387036	0.000376632	0	0.0152398	5.7451e-05	0	0	0	0	0.00177474	0	0	0.000777369	0	0	0.00192494	0	0	0	0	0	0.00592108	0	0
4930578C19Rik	0	0	0	0	0	0	0	0		0	0	0	0	0	0	0	0	0	0	0	0	0	0	0	0	0	0	0	0	0	0	0	0	0	0	0	0	0	0.000328144	0	0	0	0	0	0
4930578G10Rik	0	0	0	0	0.000968872	0	0	0		0.00194484	0	0.00730883	0	0.0015275	0	0.000288111	0	0	0	0.00219388	0.00195755	0.000385495	0.000134375	0	0	0.000526493	0	0.00927334	0.000480929	0	0.00536793	0	0.00352311	0.00142749	0	0.0015859	0.00376249	0	0.00148735	0	0	0	0	0	0
4930579G24Rik	0.0211124	0.0927583	0.00938916	0	0.03456	0	0	0.0214578		0.0778545	0.0761455	0.0863038	0.0525547	0.0392253	0	0.156263	0.223293	0.0848405	0.0570595	0.0496213	0.0448174	0.0590367	0.0391685	0.0908883	0.0521021	0.0543328	0	0.371926	0.104383	0.0856136	0.0761341	0	0.0842783	0.119014	0.0847861	0.0997487	0.107971	0	0.1054	1.94801	1.45188	1.7505	1.45698	1.05278	1.16628
4930579P08Rik	0	0	0	0	0	0	0	0		0	0	0	0	0	0	0	0	0	0	0	0	0	0.000350124	0	0	0.000504231	0	0	0	0	0	0	0	0	0	0	0	0	0	0	0	0	0	0	0
4930580E04Rik	0	0	0	0	0	0	0	0		0	0	0.00398664	0	0	0	0	0.000800771	0	0	0.0126674	0.000961598	0	0.000454848	0	0	0.0009477	0	0	0.0010176	0	0	0	0.000377313	0	0.00328906	0.000534299	0	0	0.00046874	0	0	0	0	0.000663203	0
4930589L23Rik	0	0.0227791	0	0	0.00043408	0	0	0		0.000922986	0	0	0	0	0	0.000614934	0.000528988	0	0	0.00589675	0.000787971	0.000268274	0.00142671	0	0	0.002766	0	0	0.000474162	0	0.000917765	0	0.00169472	0	0	0.00119695	0	0	0.000602639	0	0	0	0.00416782	0.00685127	0
4930590J08Rik	0	0.0195422	0	0	0.000910255	0	0	0.00460629		0.00212114	0.00139605	0.00361034	0	0.00414322	0	0.0032833	0.000841439	0.00112845	0	0.00907034	0.00601308	0.00235837	0.00336812	0	0.0103239	0.00235455	0	0	0.00272337	0	0.00943912	0	0.00398684	0.00309866	0.011468	0.00501536	0.00556238	0	0.00335001	0	0	0.0117384	0	0.00395755	0
4930592C13Rik	0	0	0	0	0.00105567	0	0	0		0.00181512	0	0.00331809	0	0	0	0.00218943	0.001068	0.00136533	0	0	0	0.00212841	0.00175201	0	0	0.00255944	0	0	0.000926912	0	0	0	0.000966522	0.00143061	0	0.0011159	0	0	0.00075229	0	0	0	0	0.000665738	0
4930594M22Rik	0	0	0	0	0.00109799	0	0	0		0.000539141	0	0	0	0.0031789	0	0.000171828	0	0	0	0	0	0.000348476	0.00110605	0	0	0.00075561	0	0	0.0002552	0	0.00121508	0	0	0.000345373	0	0	0	0	0	0	0	0	0.00666406	0	0
4930599N23Rik	0.0284333	0.0455862	0.0290826	0	0.0143144	0	0	0.025048		0.0190497	0.0136758	0.0106075	0	0.0212377	0	0.022142	0.0187417	0.0212517	0.0111813	0.0164047	0.0137104	0.0228721	0.0180129	0	0.0162218	0.0149231	0	0	0.014004	0.00980558	0.00877692	0.115534	0.0110505	0.0135889	0.0072889	0.0106768	0.0156698	0	0.0135731	0	0	0.00577133	0.0427125	0.0221588	0
4931406C07Rik	0.243813	0.139006	0.289463	0	0.256805	0	0	0.234461		0.16972	0.0943212	0.151235	0.136713	0.209923	0.0324005	0.141947	0.150591	0.144846	0.246638	0.152278	0.195706	0.151164	0.226363	0.238478	0.126924	0.24372	0.457066	0.187305	0.178252	0.120678	0.192705	0.102311	0.147943	0.149698	0.188559	0.1422	0.139329	0.0798054	0.136316	0.0265066	0.153523	0.12783	0.135774	0.116107	0
4931406P16Rik	0.249182	0.46256	0.206044	0.205561	0.316174	0.153544	0	0.308708		0.316621	0.266883	0.244427	0.529994	0.340843	0.159721	0.291577	0.412503	0.325248	0.828221	1.49442	0.862639	0.493599	0.928072	0.28798	0.674676	1.05118	0.279126	0.405007	0.400382	0.319127	0.488959	0.356648	0.263822	0.363189	0.43299	0.240897	0.253652	0.281391	0.259324	0.206095	0.264688	0.408809	0.206051	0.450779	0.415744
4931413I07Rik	0	0	0	0	0	0	0	0		0.000711672	0	0	0	0	0	0.000845958	0	0	0	0	0	0	0	0	0	0	0	0	0	0	0.00137613	0	0	0	0	0	0	0	0	0	0	0	0	0	0
4931414P19Rik	0.0553994	0.0195422	0.0379453	0	0.0339938	0	0	0.0346571		0.0503641	0.0280862	0.0954636	0	0.02862	0.084104	0.0353003	0.0351757	0.0119574	0.0325442	0.0393914	0.0321917	0.0465959	0.029335	0.0541844	0.0111823	0.0393642	0.157762	0.175344	0.0302411	0.0115003	0.0346915	0.0804132	0.0466701	0.0271854	0.0523469	0.0264763	0.0376969	0.0179355	0.0327645	0.0395946	0.0522224	0.019037	0.013442	0.0371928	0
4931423N10Rik	0	0	0	0	0	0	0	0		0	0	0	0	0.000659568	0	0	0.00123398	0	0	0	0	0	0.000527233	0	0	0.000113524	0	0	0.000212127	0	0	0	0	0	0.00252193	0	0	0	0	0	0	0	0	0.00100714	0
4931428F04Rik	0.0190211	0.0213532	0.0463115	0.0903342	0.0269408	0	0	0.0231341		0.0261595	0.0644437	0.0159998	0	0.0117322	0	0.0156134	0.0237535	0.0120137	0.0240946	0.0310711	0.0404241	0.0298951	0.0366191	0.0402017	0.0186725	0.0264681	0	0.00669936	0.0187289	0.00956779	0.0133298	0.019574	0.0101281	0.0125326	0.0336126	0.00945674	0.0164475	0.0500408	0.0090207	0.023176	0	0.0243786	0	0.0202672	0
4931431C16Rik	0	0	0	0	0	0	0	0		0	0	0.00182825	0	0	0	0	0	0	0	0	0.000745394	0	0	0	0	0	0	0	0	0	0	0	0.000560696	0	0	0.00124728	0	0	0.000691228	0	0	0	0	0	0
4931440F15Rik	0	0	0	0.0527869	0.00330128	0	0	0		0.00172927	0	0.0122072	0	0.0019533	0	0.00289938	0.00085298	0.0038453	0	0.0140072	0.00341103	0.00104206	0.00278907	0	0	0.00203682	0	0	0.00228688	0	0.00025594	0	0.00292811	0.00596612	0.00273329	0.0034628	0.00109323	0	0.00426632	0	0	0.0099724	0	0.00181936	0
4931440J10Rik	0	0	0	0	0.00158509	0	0	0		0.00307913	0.00157369	0	0	0.00299607	0	0.000820972	0.00114885	0	0.00181747	0	0.000677523	0.000301259	0.00138805	0	0	0.00140917	0	0	0.000590046	0	0.00805687	0	0.001583	0	0	0.000327287	0	0	0.000398426	0	0	0	0	0.000578905	0
4932416K20Rik	0.00882332	0	0	0	0	0	0	0		0.000308485	0	0.00304264	0	0.000429377	0	0.00176438	0.00353798	0	0.00258674	0.0084207	0.00222356	0.000820255	0.00120466	0	0	0.00196135	0	0	0.000828048	0.00863717	0.00267358	0	0.00378158	0.00306103	0.00574808	0.0029208	0	0.0243202	0.00328952	0	0.0236995	0	0	0.00109867	0
4932422M17Rik	0.0126885	0.0275956	0.00614775	0	0.0232938	0	0	0.014948		0.0297724	0.0158042	0.0144543	0.0525547	0.0382809	0	0.0420575	0.067777	0.0407967	0.0309542	0.0279989	0.0291687	0.041041	0.0266679	0.0582049	0.0321403	0.0324298	0	0.00805594	0.0326692	0.0117978	0.0250224	0	0.0323003	0.0350007	0.0357919	0.0380865	0.035503	0.0899016	0.0436811	0.0192232	0.0550669	0.0168741	0.00426728	0.0315756	0
4932435O22Rik	0	0	0	0	0	0	0	0		0	0	0	0	0	0	0	0	0	0	0	0	0	0	0	0	0	0	0	0	0	0	0	0	0	0	0.000173618	0	0	0.00136289	0	0	0	0	0	0
4932438A13Rik	0.196687	0.307309	0.145231	0.0903342	0.209819	0.307088	0.703878	0.223919		0.148475	0.13471	0.246886	0.105027	0.219073	0.148831	0.135683	0.181831	0.225916	0.158028	0.467978	0.20457	0.122785	0.194218	0.208127	0.0483839	0.182151	0.0845409	0.150205	0.203666	0.131171	0.207501	0.41766	0.189593	0.158612	0.19409	0.198189	0.180622	0.449066	0.251483	0.192873	0.390252	0.260017	0.237693	0.22104	0.503651
4932438H23Rik	0.0935929	0.0667773	0.23671	0.0903342	0.088681	0	0.703878	0.146039		0.0857149	0.0230673	0.00215262	0	0.0229148	0.064801	0.0149612	0.00731713	0.00708894	0.0100986	0	0.0106608	0.00910698	0.00421913	0	0.0131022	0.00312332	0.16826	0	0.00519672	0.011968	0.0186592	0	0.00823097	0.00630442	0.00230205	0.00348757	0	0.0720529	0.00503499	0	0	0	0	0.0041645	0
4932443L11Rik	0.00161485	0	0	0	0.00135279	0	0	0		0.000215488	0	0	0	0.000749844	0	0.000933373	0.0018385	0	0.00364952	0	0	0.00213938	0.00081633	0	0.0114053	0.00119563	0	0	0.000726161	0	0	0	0	0	0.00252474	0	0	0	0	0	0	0	0	0	0
4932702P03Rik	0	0	0	0	0	0	0	0		0	0	0	0	0.000632857	0	0	0.0005156	0	0	0	0	0	0.000966732	0	0	0.000311732	0	0	0.00118807	0	0	0	0	0	0.0015932	0	0	0	0	0	0	0	0	0	0
4933400C23Rik	0	0	0	0	0	0	0	0.001945		0.000830011	0.00120402	0	0	0	0	0.00119837	0.00167751	0	0	0	0	0.000703398	0.00020628	0	0	0	0	0	0	0	0.00118527	0	0	0	0	0	0	0	0	0	0	0	0	0	0
4933404O12Rik	0.00765341	0.0213532	0.0124324	0	0.00900956	0	0	0.00334941		0.0124983	0.00945406	0.0184297	0	0.0156706	0.0524973	0.0252149	0.0464278	0.00529674	0.0124767	0.0150387	0.0147906	0.0132577	0.0152934	0	0.00765785	0.0118343	0	0.00786807	0.014225	0	0.0048505	0	0.0130442	0.00955657	0.00975736	0.0169307	0.0123934	0	0.0103448	0.197693	0.155979	0.0860291	0.0979441	0.0841653	0.448144
4933405D12Rik	0.00391103	0	0	0	0.00498933	0	0	0		0.00577926	0	0	0	0.00409877	0	0.00166032	0.00141718	0.00149166	0.00470193	0.00236832	0.00323385	0.000914543	0.00210023	0	0	0.00100541	0	0	0.00132912	0	0.00207463	0	0.00162778	0.00239648	0	0.000417437	0.00155686	0	0.00159019	0	0	0	0	0.000599433	0
4933405L10Rik	0	0	0	0	0.000462755	0	0	0.0029308		0	0	0	0	0	0	0	0.000450058	0	0	0.000764852	0	0	0.000719312	0	0	0.000327794	0	0	0.000763112	0	0	0	0	0	0	0	0	0	0	0	0	0	0	0.000905949	0
4933406C10Rik	0.0029122	0	0	0.0903342	0.00593946	0	0	0.00658048		0.00417075	0	0.00480233	0	0.00404876	0	0.00135222	0.00235436	0.00139248	0	0	0.00443296	0.000561532	0.00371016	0	0	0.00352316	0	0	0.00268872	0	0.00573502	0	0.00738118	0.0034765	0.00224958	0.00428561	0	0	0.00455357	0	0	0	0	0.00146035	0
4933406G16Rik	0.000970842	0	0	0	0.00094986	0	0	0		0.000266421	0	0.00261458	0	0.000642719	0	0.000153302	0.00040774	0	0.00339796	0	0	0.000965051	0.000808712	0	0	0.00109271	0.0998363	0	0.00107275	0	0	0	0.00019793	0	0	0.00162292	0	0	0.000597237	0	0	0	0	0	0
4933406I18Rik	0.00673196	0	0	0	0.00179928	0	0	0.00288119		0.00181025	0.00135118	0	0	0.00282248	0	0.00237822	0.0034494	0	0	0.00471198	0.00349356	0.00326106	0.0027554	0	0	0.00310848	0	0	0.00371446	0	0.0149727	0	0.00641251	0.004321	0	0.00601292	0.00534688	0	0.0029816	0	0	0	0.0167679	0.0016196	0
4933406P04Rik	0.00529137	0	0.0152318	0	0.00671977	0	0	0.00849983		0.00470931	0.00806691	0.00420045	0	0.000729463	0	0.00533296	0.00778055	0.00334354	0.00459636	0	0.00804432	0.00944234	0.00517942	0	0	0.00650914	0	0.00614628	0.00723597	0	0.00174621	0	0.0053105	0.00911785	0.00276267	0.00805419	0.00342035	0.0222867	0.00725356	0.019082	0	0	0	0.00622829	0
4933407L21Rik	0	0	0	0	0.000319564	0	0	0		0	0	0	0	0	0	0	0	0	0	0	0	0	5.29823e-05	0	0	0.000576471	0	0	0.000273324	0	0	0	0	0	0.00235575	0	0	0	0	0	0	0	0	0	0
4933408B17Rik	0.00642659	0	0.0148928	0	0.00648583	0	0	0		0.00890871	0.0195322	0.00217468	0	0.0115623	0.0324005	0.0141743	0.0116055	0.0239226	0.0202253	0.0440341	0.0276544	0.0147289	0.0127146	0.0181694	0.0103239	0.0142023	0	0	0.0170967	0.00744596	0.0399523	0	0.0160086	0.0445284	0.0556923	0.035129	0.0273592	0.0453093	0.0164255	0	0.0313879	0.00792624	0.0505137	0.0335322	0
4933408J17Rik	0	0	0	0	0.000900379	0	0	0		0.00040656	0	0	0	0.000580024	0	0.00109699	0.00133208	0	0	0	0	0	0.000263164	0	0	0.000240816	0	0	0.000122978	0	0.000791259	0	0	0	0	0	0.0020632	0	0	0	0	0	0	0.00216108	0
4933408N05Rik	0.00690426	0	0	0	0.00982854	0	0	0.0187718		0.020577	0.00350801	0.0043418	0	0.00789718	0	0.0108842	0.00408146	0	0.00411058	0	0.00243266	0.00229805	0.00336358	0	0	0.00315814	0	0	0.00199637	0	0.00405424	0	0.000212068	0.00319501	0.00531966	0.00015473	0.00216425	0.0303606	0.000657276	0	0	0	0.0169517	0.00302127	0
4933411E06Rik	0	0	0	0	0.0022731	0	0	0.00164176		0.00247199	0.00469532	0.00320924	0	0.0112278	0	0.000988442	0.00196472	0	0.00241096	0	0.00308484	0.00136414	0.000771666	0	0	0.00170819	0	0	0.00213834	0	0.00117265	0	0.0017772	0.00405305	0	0.00297918	0.00237112	0	0.00324332	0	0	0	0.0106533	0.00284808	0
4933411E08Rik	0	0	0.0217197	0	0.000600825	0	0	0.00271126		0.000929197	0	0.00344087	0	0	0	0.000699148	0.000964519	0	0	0	0.00183638	0.00124219	0.000439303	0	0	0	0	0	0.000376393	0	0.00137783	0	0.00130152	0	0	0.00141154	0.00119572	0	0.000715759	0	0	0	0	0	0
4933412O06Rik	0	0	0	0	0.0015904	0	0	0.00273734		0.00232651	0	0.00224844	0	0.00174826	0	0.00410397	0.00660514	0.0066835	0.0113733	0.000734051	0.00303386	0.00605033	0.00762943	0.0168666	0	0.0210894	0	0	0.0112542	0.00738195	0.00321106	0	0.00665188	0.00602316	0	0.0081558	0.00618008	0	0.0105017	0	0.0152835	0	0.0144673	0.0253999	0
4933415A04Rik	0	0	0.0119655	0	0.00150343	0	0	0		0.00209032	0	0	0	0	0	0.000625776	0.000151495	0	0	0	0.000706775	0.000456667	0.00011719	0	0	0.000612402	0	0.0358012	0.00105059	0.00713586	0	0	0.00583787	0	0	0.00123702	0	0	0.00298371	0	0	0	0	0	0
4933417D19Rik	0	0	0.00378053	0	0.00072601	0	0	0		0.000595083	0	0.0011805	0	0.00172971	0	0.00050561	0.000823108	0	0	0	0.00181177	0	0.00128128	0.0559914	0	0.000600083	0	0	0.000341705	0	0.000802839	0	0.000219055	0.000407879	0.00183769	0.00158893	0	0	0.00157513	0	0	0	0	0	0
4933417E11Rik	0	0	0	0	0	0	0	0		0.00055874	0	0	0	0	0	0.000370577	0	0	0.00159642	0	0	0.000632561	0	0	0	0	0	0	0	0	0	0	0	0.000533652	0	0	0	0	0	0	0	0	0	0	0
4933417O13Rik	0.00133167	0	0	0	0.000292201	0	0	0.0288162		0	0	0	0	0.00933297	0	0.000820473	0	0	0.00187719	0	0	0	0.00102971	0	0	0.00162087	0	0	0.00158897	0.00683901	0.000956041	0	0.00274112	0.00581185	0	0.000799221	0.00585642	0	0.00231748	0	0	0	0	0	0
4933422A05Rik	0	0	0	0	0.00145686	0	0	0		0.000666225	0	0	0	0	0	0.000143548	0	0	0	0	0.000741592	0.000632358	0.00039362	0	0	0	0	0	0.00141697	0	0.00621205	0	0.00380992	0	0.00118385	0.000480288	0.00304259	0	0.000774436	0	0	0	0	0	0
4933424G06Rik	0	0	0	0	0.00089109	0	0	0		0.00048749	0.000908825	0	0	0.000586426	0	0.000450205	0.000509862	0	0	0	0	0.000941949	0.000935313	0	0	0.000933729	0	0	0.000630071	0	0.00062668	0	0	0	0	0	0	0	0	0	0	0	0.00523738	0.000991088	0
4933427D14Rik	0.0319699	0.0237715	0.0365011	0	0.029872	0	0	0.0337942		0.0258985	0.0198499	0.0470906	0	0.0322423	0.0376012	0.0232056	0.0285177	0.0231842	0.0174939	0.0177795	0.0285969	0.017728	0.0261116	0.0781713	0.00765785	0.0294236	0.243297	0.0321883	0.0284619	0.0406075	0.023795	0.0224325	0.0346724	0.0288427	0.0244969	0.0331263	0.0343655	0	0.0364246	0.112098	0.0519169	0.0449718	0.037142	0.0425227	0
4933427E11Rik	0.00401298	0	0	0	0.00133827	0	0	0.00147249		0.000733137	0.00223939	0	0	0.00122673	0	0.000637588	0.00165469	0.0013989	0.00365324	0	0.00065325	0.00172155	0.00196706	0	0	0.00112258	0	0	0.000986655	0	0.000400686	0	0.00110232	0.0011405	0	0.00113474	0	0.0196789	0.00130387	0	0	0	0	0	0
4933428G20Rik	0	0	0	0	0	0	0	0		0	0	0	0	0	0	0	0	0	0	0	0	0	0	0	0	0.000559511	0	0	9.54122e-05	0	0	0	0	0	0	0	0	0	0	0	0	0	0	0	0
4933428P19Rik	0	0	0	0	0.000552318	0	0	0.00341351		0	0.000909052	0	0	0	0	0	0.00224637	0	0	0	0	0	0.000598624	0	0	0.000668874	0	0	0.000942417	0	0	0.019574	0	0	0.00226144	0	0	0	0	0	0	0	0	0.000432393	0
4933429H19Rik	0	0	0	0	0.00226498	0	0	0		0.000656399	0	0.00691289	0	0.00502612	0	0.00108286	0.000516555	0	0	0.00421208	0	0.000433804	0.00181628	0	0	0.000674339	0	0	0.00297178	0	0.00168151	0	0.00191264	0.00166877	0	0.0025009	0	0	0.00281572	0	0	0	0	0.00294463	0
4933430I17Rik	0	0	0	0	0.00102926	0	0	0.00345426		0.00073958	0	0.00371349	0	0	0	0.000849878	0.000364913	0.0019369	0	0	0.00211441	0.00201996	0.000595481	0	0	0.00058459	0	0	0.000688722	0	0.00361382	0	0.000957017	0.000961037	0	0.000392222	0.00018016	0	0.000870279	0	0	0	0	0.00269649	0
4933431E20Rik	0.010663	0.0239798	0.0169639	0	0.0168828	0	0	0.0201817		0.011593	0.0216451	0.0574681	0	0.0334585	0.0614447	0.015378	0.0275267	0.123751	0.0394817	0.0510174	0.0905955	0.0224998	0.0737292	0.0707253	0.120924	0.0681302	0.0991631	0.0718882	0.104122	0.102323	0.0913472	0.0600529	0.138773	0.0650097	0.0686676	0.133667	0.048488	0.0676451	0.0955042	0.0215731	0	0.1003	0.0112194	0.0272588	0
4933432I09Rik	0	0	0	0	0	0	0	0.00207578		0	0	0	0	0	0	0	0.000332689	0	0	0	0.00240484	0	0.000416657	0	0	0.000627502	0	0	0.000968506	0.00923491	0	0	0.000503534	0	0.00236522	0.00253984	0	0	0.0014014	0	0	0	0	0.00101249	0
4933433G15Rik	0	0	0	0	0.00228246	0	0	0		0.00160155	0.00371612	0	0	0.00387785	0	0.00205277	0.00245335	0.00167376	0	0.00334885	0	0.00281272	0.00137204	0	0	0.00200776	0	0	0.00156556	0.0210404	0.00334887	0	0.00165045	0.00355703	0.00209337	0.00232656	0.00163192	0	0.00155861	0	0	0	0.0081083	0.00117583	0
4933434E20Rik	0.553237	0.591857	0.75943	0.695391	0.572003	2.231	0.703878	0.574892		0.570528	0.341994	0.647941	0.704435	0.47267	1.10193	0.518706	0.476974	0.667948	0.618409	0.439061	0.514202	0.675279	0.50308	0.484131	0.459957	0.513507	0.748186	0.413163	0.520681	0.613765	0.455329	0.270861	0.562345	0.517527	0.521057	0.578874	0.506198	0.412062	0.593616	0.373544	0.174646	0.31891	0.297211	0.391877	0.194382
4933440M02Rik	0	0	0	0	0	0	0	0		0.000633572	0	0	0	0	0	0.000651295	0	0	0	0	0	0	0	0	0	0	0	0	0	0	0.0011714	0	0	0	0	0	0	0	0	0	0	0	0	0	0
5031415H12Rik	0	0.0275956	0	0	0.00146925	0	0	0		0	0	0	0	0.000799326	0	0	0.000195627	0	0	0	0	0	0.000619357	0	0	0.000478106	0	0	0.000642439	0	0	0	0	0	0	0	0	0	0	0	0	0	0	0.000660833	0
5031425E22Rik	0.191639	0.160152	0.188223	0.0749991	0.187192	0.153544	0	0.212294		0.14312	0.0906182	0.330859	0.233966	0.255953	0.495714	0.147037	0.178661	0.269723	0.175736	0.294519	0.226623	0.141251	0.175744	0.253793	0.161299	0.185584	0.2157	0.231161	0.276203	0.177288	0.20626	0.194591	0.30295	0.238149	0.249497	0.304229	0.312522	0.432564	0.298394	0.226404	0.257899	0.250611	0.156644	0.222114	0.221361
5031425F14Rik	0	0	0	0	0.000460998	0.153544	0	0		0	0	0.00215262	0	0	0	0.00060603	0.00149272	0	0	0.000832118	0.0029085	0.000433261	0.00194173	0	0	0.00117606	0	0	0.00176259	0	0.00609702	0	0.00329922	0.00121083	0	0.000572903	0	0	0.000217813	0	0	0	0	0.000356527	0
5031439G07Rik	0.135286	0.224969	0.109078	0.113464	0.170914	0	0	0.147125		0.155889	0.14969	0.0931334	0.136713	0.164284	0	0.148079	0.148131	0.143744	0.0998277	0.0967548	0.145521	0.10241	0.106886	0.0212979	0.0288506	0.0802966	0.160442	0.0771306	0.115891	0.230272	0.0870524	0.232764	0.106439	0.102253	0.135039	0.1325	0.109855	0.130416	0.144832	0.0650164	0.132587	0.198825	0.0594101	0.109751	0
5033403F01Rik	0.00220489	0	0	0	0.00353278	0	0	0.00900853		0.00180816	0.00950146	0.00920132	0	0.00507834	0	0.00219883	0.00334152	0.00251448	0.00698083	0	0.000704073	0.00270641	0.00507182	0	0	0.00176567	0	0	0.0026679	0	0.00104432	0	0.00264243	0	0	0.00137567	0.00125201	0	0.0014848	0	0	0	0	0.00298055	0
5033406O09Rik	0.0881953	0.15549	0.023652	0	0.0546385	0	0.703878	0.0849125		0.0424209	0.041005	0.122016	0.128939	0.03113	0.0687107	0.0426782	0.0487793	0.0637234	0.0480911	0.0616663	0.0724408	0.0353629	0.0604503	0.0252471	0.06126	0.0629065	0	0.0346519	0.0515353	0.0598861	0.00784292	0	0.0202163	0.0332988	0.0607593	0.0345987	0.0236945	0.0939293	0.0323421	0.024395	0.0404981	0.0153054	0.0636956	0.0485405	0
5033417F24Rik	0.00199433	0	0.00816971	0	0.00196578	0	0	0.0109255		0.000857503	0.00542743	0	0	0.00998751	0	0.00179221	0.00374732	0.00883639	0.00634893	0.0185134	0.00396781	0.00180348	0.00471994	0	0	0.00597101	0	0	0.00812673	0.023846	0.00350097	0	0.0073588	0.0109458	0.00889731	0.0112132	0.00640174	0	0.0109898	0	0	0.0240918	0	0.00293464	0
5033421B08Rik	0	0	0.00600369	0	0	0	0	0		0.00238225	0.00172248	0.0114064	0.0644695	0.00773804	0	0.000931886	0.000620984	0	0	0	0.000449322	0.00103467	0.000229866	0	0	0	0	0	0.0018132	0	0.000422222	0	0.000194822	0.00274639	0	0.00442611	0	0	0.00215501	0	0	0.0162418	0	0	0
5033426O07Rik	0	0	0	0	0	0	0	0		0	0.00215772	0.00684066	0	0	0	0.00071646	0.000277715	0.00638407	0	0	0.00184227	0.00174638	0.000399388	0	0	0.00054821	0	0	0.0012236	0.0110528	0.0043311	0	0.000171836	0.000707988	0.00303964	0.00235959	0	0	0.000827905	0	0	0	0	0.00129545	0
5033428I22Rik	0.427554	0.310761	0.514865	0.172907	0.271079	0.467891	0.703878	0.54221		0.236144	0.177223	0.359377	0.294377	0.13924	0.47081	0.168605	0.215625	0.403848	0.223454	0.148986	0.331123	0.204179	0.2978	0.191952	0.183581	0.343846	0.637734	0.263404	0.438567	0.28083	0.402606	0.489786	0.395327	0.346353	0.423649	0.398434	0.253526	0.372223	0.338492	0.449398	0.51467	0.354619	0.237319	0.434706	0.858466
5033430I15Rik	0.0402588	0	0.0495247	0.0489541	0.029572	0	0	0.0373343		0.0474717	0.0113165	0.0427748	0.152583	0.0240056	0	0.0377349	0.0479095	0.0291626	0.0508491	0.057626	0.0303297	0.0612103	0.0528028	0	0.0621937	0.0596	0	0.0127879	0.018308	0	0.016973	0.01469	0.00647919	0.0196185	0.0235254	0.00749508	0.0179273	0.0376144	0.00701764	0.0535931	0	0.0288596	0.0593778	0.0434711	0.226783
5330416C01Rik	0	0.0275956	0	0	0.00217735	0	0	0.00303959		0.00147523	0.0025211	0.0166039	0	0.00313107	0	0.00364479	0.0210162	0.0169047	0.0148671	0.00189279	0.01305	0.00115126	0.0217993	0.0378212	0.0104338	0.0199142	0	0	0.0441647	0	0.000356817	0	0.000719798	0.0244465	0.0676703	0.0106023	0.0279219	0.088817	0.00748207	0.0662313	0.12386	0	0.0128753	0.0547465	0
5330417C22Rik	0	0	0	0	0.000265175	0	0	0		0.00148586	0	0	0	0	0	0.000206578	0.000420937	0	0	0	0	0	0.000612866	0	0	0.00148273	0	0	0.000477477	0	0.000990712	0	0	0.000446912	0.00406427	0	0	0	0	0	0	0	0	0.000804339	0
5330429C05Rik	0	0	0	0	0.00113483	0	0	0		0.0010465	0	0	0	0.00377751	0	0.000391798	0.000631391	0	0	0.00147975	0	0.000861642	0.0014749	0	0	0.00256764	0	0	0.000728276	0	0.000606251	0	0	0.000368966	0.00218802	0	0	0	0	0	0	0	0	0.00496029	0
5330434G04Rik	0	0	0	0	0	0	0	0		0	0	0.00202632	0	0	0	0	0.000453646	0	0	0	0	0	0.00035818	0	0	0.000315862	0	0	0.000326164	0	0	0	8.45792e-05	0	0.00299434	0	0	0	0	0	0	0	0	0	0
5330439A09Rik	0	0	0	0	0.000867858	0	0	0		0	0	0	0	0	0	0	0.000200416	0	0	0	0	0	0.00032572	0	0	0.000921821	0	0	0	0	0	0	0	0	0	0	0	0	0	0	0	0	0	0	0
5430401H09Rik	0	0	0	0	0.00270522	0	0	0.00313793		0.000916171	0.0015038	0.0156445	0	0.00926297	0	0.000116697	0.000471002	0.0203691	0	0	0.00348361	0	9.36171e-05	0	0	0	0	0	0.00785599	0.0105863	0.00580099	0	0.0102876	0.00207485	0	0.0212452	0.0058222	0	0.0178423	0	0	0	0	0	0
5430402O13Rik	0.00323308	0	0	0	0.00578384	0	0	0.00212689		0.00399056	0.00319102	0.0156774	0	0.0032241	0	0.00298733	0.00380981	0.0244191	0.00206603	0.00341463	0.00693515	0.00125894	0.00540446	0	0.0159691	0.00500534	0	0	0.00712567	0.0321444	0.0195429	0.0182256	0.0145346	0.00960493	0.00445871	0.0063768	0.00438987	0	0.00580247	0	0	0	0	0.00508695	0
5430403G16Rik	0.019102	0.0253212	0.131572	0.117976	0.0516217	0	0	0.0513727		0.032639	0.0499344	0.0270337	0	0.0340828	0	0.011929	0.0107946	0.00769856	0.0129791	0.0297103	0.00824216	0.0091897	0.0108339	0	0	0.0098771	0	0.00786807	0.0129607	0.00801589	0.0279287	0	0.0180365	0.0197831	0.00601955	0.0107439	0.0126611	0	0.00750461	0	0	0	0.0294826	0.0107854	0
5430403N17Rik	0	0	0	0	0	0	0	0		0	0	0	0	0	0	0	0.000297293	0	0	0	0	0	0.00157588	0	0	0.00218509	0	0	0.000157991	0	0	0	0	0	0	0	0	0	0	0	0	0	0	0	0
5430416N02Rik	0.0497966	0.0401953	0.0645235	0.137439	0.0553975	0	0.703878	0.0396643		0.0669091	0.0673975	0.139253	0	0.0576142	0.0380987	0.0787345	0.0639526	0.052365	0.0550991	0.0419958	0.0738467	0.0498449	0.0608183	0.0684172	0.0363439	0.05583	0.131862	0.0441538	0.0657802	0.0341016	0.0353105	0.0959398	0.0517305	0.0422052	0.067521	0.0475461	0.0555982	0.0196789	0.0543619	0.0417897	0.0595894	0.04508	0.0332118	0.0797607	0
5430421F17Rik	0	0	0	0	0.000693447	0	0	0		0	0	0	0	0.00120116	0	0	0.000839147	0	0	0	0	0	0.000358278	0	0	0.000399875	0	0	0.000440688	0	0	0	0	0	0	0	0	0	0	0	0	0	0	0.00145293	0
5430425K12Rik	0	0	0	0	0.000222698	0	0	0		0.000533014	0	0	0	0.00122052	0	6.12187e-05	0.00114235	0	0.00327616	0	0.000547694	0.000798765	5.22579e-05	0	0	0.000771635	0	0	0.000951723	0	0.00173389	0	0.00207308	0.00157969	0	0.000459689	0	0.0179355	0.000738756	0	0	0	0	0	0
5430427N15Rik	0.00287119	0	0	0.0489541	0.00343554	0	0	0.00339593		0.00251332	0	0	0	0	0	0.000316268	0	0	0	0	0	0	0.000320061	0	0	0	0	0	0.00105807	0	0.000191497	0	0	0	0.00219165	0	0.00116339	0	0	0	0	0	0	0.00115904	0
5430427O19Rik	0	0	0.011263	0	0.0010848	0	0	0.00745112		0.00103113	0.00125505	0.010286	0	0.00224753	0	0.00187888	0.00125491	0	0	0.00426521	0.00100676	0.00124867	0.00235242	0	0	0.00153879	0	0	0.00185017	0	0.00718183	0	0.00291778	0.000828138	0.00314722	0.00214821	0	0	0.00133395	0	0	0	0	0.00105917	0
5430431A17Rik	0.00287951	0.0253212	0.0101355	0	0.00496918	0	0	0.00992573		0.00254915	0	0.0146655	0	0.00242627	0	0.00223188	0.00375366	0.0150406	0.00350834	0.00678933	0.0125375	0.00147159	0.00856078	0.0382494	0	0.00818908	0.0632511	0	0.0069535	0	0.00334787	0.0959398	0.0111651	0.00297989	0.00263518	0.00930595	0.00603448	0	0.0147852	0	0	0	0	0.00289265	0.226783
5430440P10Rik	0.00605471	0	0	0	0.00118105	0	0	0		0.00229532	0	0	0	0	0	0.000287016	0.00126554	0	0.00262178	0	0	0	0.000633775	0	0	0.000372728	0	0	0.00106614	0	0	0	0	0.00150903	0	0	0.00135829	0	0	0	0	0	0	0.00208459	0
5730409E04Rik	0.0953742	0.0489488	0.12831	0.0606767	0.10547	0	0	0.133157		0.0937131	0.0484838	0.182904	0	0.193646	0.219012	0.095565	0.118319	0.193959	0.136267	0.219593	0.193702	0.078838	0.178096	0.307891	0.153911	0.184556	0.0632511	0.0565836	0.171319	0.189314	0.103859	0.185073	0.158826	0.105863	0.147003	0.16993	0.137542	0.147989	0.186288	0.117025	0.0683512	0.157365	0.136761	0.143804	0.503651
5730422E09Rik	0.00837714	0.0195422	0.00879657	0	0.0106732	0	0	0.00519842		0.00466875	0.00129737	0.00285328	0	0.00864971	0	0.00195414	0.00262907	0.0052906	0.00137378	0	0.00326647	0.00340055	0.0027562	0	0	0.00241735	0	0	0.00304601	0.0156003	0.00173681	0	0.00319926	0.00278296	0.0008469	0.00179263	0.00649557	0	0.00182798	0	0	0	0	0.00209578	0
5730455P16Rik	0.130107	0.241296	0.184015	0.0903342	0.135319	0.192086	0.703878	0.138464		0.130514	0.0670681	0.212021	0.366315	0.133403	0.419123	0.121604	0.141881	0.176661	0.156392	0.15458	0.184014	0.111876	0.158781	0.11493	0.129067	0.179564	0	0.116869	0.176995	0.127001	0.155883	0.577773	0.182153	0.153699	0.175611	0.18845	0.146943	0.171666	0.196456	0.124078	0.22431	0.184789	0.119491	0.164758	0.221361
5730480H06Rik	0.12339	0.0713017	0.114042	0.0489541	0.109344	0	0.703878	0.155501		0.15202	0.223785	0.0722399	0	0.134159	0.103176	0.179553	0.164935	0.0966948	0.183955	0.105603	0.153127	0.134933	0.142444	0	0.280577	0.175904	0	0.100638	0.157257	0.12037	0.156506	0.0880185	0.140751	0.183613	0.149178	0.139182	0.18088	0.0934852	0.148174	0.199257	0.31061	0.241233	0.251175	0.142177	0
5730507C01Rik	0.0212062	0.115987	0.0258299	0.0527869	0.0402969	0	0	0.0244455		0.0199371	0.0272332	0.0471036	0	0.0229508	0	0.0174715	0.0171592	0.0217426	0.0199694	0.0244255	0.0156801	0.0139193	0.0157318	0.0181694	0.0145241	0.022063	0	0	0.0183198	0.0265775	0.0162813	0.020005	0.0163677	0.0190632	0.0369246	0.0129124	0.0302759	0.0222867	0.0129083	0	0.0194401	0.0129389	0	0.0184398	0
5730522E02Rik	0	0	0	0	0	0	0	0		0	0	0	0	0	0	0	0.000547935	0	0	0.000734051	0	0	0.000283339	0	0	0.000425701	0	0	0.000366844	0	0	0	0	0	0	0	0	0	0	0	0	0	0	0.000679513	0
5730559C18Rik	0.0195965	0.0852272	0	0	0.072647	0	0	0.015289		0.0839773	0.0423278	0	0.0644695	0.0459092	0	0.0515323	0.0667392	0.0032842	0.0426342	0.0631875	0.0196954	0.0565943	0.0479492	0	0.0575722	0.0313953	0	0	0.00879494	0	0.0130475	0.01469	0.000120384	0.0102728	0.0135287	0.000428391	0.00237174	0.00591453	0.000175603	0	0.0173664	0.00795499	0	0.015978	0
5730596B20Rik	0	0	0	0	0.00456921	0	0	0		0.0032316	0	0	0	0.00462424	0	0.00149247	0.00152017	0	0	0	0	0	0	0	0	0	0	0	0.000702622	0	0.0011676	0	0	0	0	0	0.00265848	0	0	0	0	0	0	0	0
5830418P13Rik	0	0	0	0	0.00126793	0	0	0.00392481		0.000266852	0	0	0	0	0	0.000768654	0.000456483	0	0.00285853	0	0	0.00067406	0.000198316	0	0	0.000128355	0	0	0	0	0	0	0	0	0	0	0	0	0	0	0	0	0	0	0
5830432E09Rik	0	0	0	0	0.000681243	0	0	0		0.000309761	0.00112895	0.00296082	0	0.00458464	0	0.00314223	0.0023453	0.00184863	0.00236741	0.000764852	0.00326029	0.00627281	0.0047137	0	0.00729163	0.00331404	0	0	0.0026989	0	0.000640771	0	0.00112498	0.0020979	0.00619334	0.000521059	0.00400583	0	0.00202668	0	0	0	0	0.00497498	0
5830454E08Rik	0.0159264	0	0.082577	0	0.0130475	0	0	0.0169165		0.00879817	0.00601886	0.010806	0	0.00800136	0	0.00387268	0.00710229	0.0220019	0.0117024	0.0127409	0.0115049	0.00794557	0.00970471	0	0.0220471	0.0129143	0	0.0231075	0.0165903	0.0415794	0.00595825	0	0.0140021	0.00991701	0.0239017	0.0142454	0.0239068	0	0.0153323	0	0	0.0158116	0	0.0104391	0
5930412G12Rik	0.00782135	0.0213532	0.0494707	0	0.00664894	0	0	0.00939693		0.00228073	0.00970792	0.0234041	0	0.0153811	0	0.00215959	0.00226838	0	0.00126695	0	0.00346509	0	0.000783504	0	0	0.000559542	0	0	0.00995146	0	0.047443	0	0.00954603	0	0.00896135	0.000690728	0.00122261	0	0.000447397	0	0	0	0	0	0
5930422O12Rik	0	0.0239798	0	0	0	0	0	0		0	0	0	0	0.0016944	0	0	0	0	0	0	0	0	0.0004798	0	0	0.000626051	0	0	0.00046302	0	0	0	0	0	0	0	0	0	0	0	0	0	0	0	0
5930430L01Rik	0.098203	0.094634	0.216589	0	0.0746797	0	0	0.0730859		0.0447773	0.0384761	0.134827	0.105027	0.105849	0.152959	0.0428979	0.0665634	0.143559	0.0973288	0.104866	0.102114	0.049816	0.0844403	0.0656068	0.0278076	0.0854316	0.267423	0.155102	0.188542	0.251215	0.191238	0.144052	0.306113	0.126587	0.0919384	0.225865	0.21997	0.0460477	0.244868	0.0785845	0.0481281	0.101936	0.0343013	0.0873937	0
6030407O03Rik	0.0694999	0.0443483	0.10554	0	0.141938	0	0	0.105092		0.0275456	0.025329	0	0	0.00194515	0	0.000584983	0.00246956	0	0	0	0	0	0.000256048	0	0	0.000262063	0	0	0.00280979	0	0	0	0.00233038	0.00183264	0.00188706	0.000532646	0.00311285	0	0.000985242	0	0	0.0071676	0	0.00131563	0
6030408B16Rik	0.033447	0.416952	0.146307	0.0903342	0.0522342	2.20043	0	0.0484823		0.0397537	0.104147	0.702892	0	0.200886	1.29289	0.113481	0.195704	0.629777	0.179353	0.0705159	0.254798	0.0667932	0.130618	0.980889	0.0864098	0.119722	1.88199	1.9494	1.2525	1.80363	0.624996	1.31697	1.66159	0.660143	0.264082	1.21657	1.27605	0.919336	1.63145	1.3516	1.33577	0.765761	0.629988	0.874917	2.42979
6030419C18Rik	0.0210127	0.0239798	0.0138838	0	0.108069	0.34563	0	0.00964878		0.0618234	0.0997783	0.0825822	0.0722439	0.397683	0.250201	0.0732141	0.119035	0.254057	0.131186	0.170328	0.216698	0.0899511	0.142907	0.236851	0.0483027	0.0777916	0.162594	0.0380609	0.14937	0.209467	0.0797842	0.0342838	0.104446	0.133524	0.270976	0.163122	0.112958	0.0253466	0.136002	0.0678634	0.0513794	0.136916	0.0676483	0.0636595	0
6030443J06Rik	0.00989594	0.0213532	0.0110208	0	0.00847518	0	0	0.00707695		0.0104416	0.00431039	0.0012936	0	0.00474305	0	0.00548762	0.00627342	0.0046957	0.0158716	0.0126674	0.00935999	0.00629701	0.00882651	0	0	0.0101672	0	0	0.00704735	0.00683901	0.0154177	0	0.00594864	0.00876833	0.00646876	0.00588942	0.0118307	0	0.00826922	0.0340745	0	0.0117384	0	0.0261825	0
6030445D17Rik	0.00220568	0.0275956	0.0099838	0	0.00590501	0	0	0.0148119		0.00570328	0.00265615	0.00816472	0	0.00862785	0	0.00750068	0.00725927	0.00496219	0.00373838	0.0124069	0.00406834	0.00469206	0.00579663	0	0.0187508	0.00594501	0	0	0.00872588	0.0228686	0.00530602	0	0.0073631	0.00779764	0.0140007	0.0114321	0.0107716	0	0.00634456	0.0169987	0.0157642	0.0117384	0.0090379	0.00788659	0
6030458C11Rik	0.115584	0.129322	0.370334	0.16625	0.108718	0	0	0.118285		0.102537	0.0792115	0.104423	0.25761	0.123344	0.189444	0.107196	0.139944	0.178975	0.144131	0.201997	0.140221	0.120538	0.147001	0.278684	0.108928	0.147396	0.123553	0.0801708	0.153709	0.188972	0.136462	0.173118	0.156921	0.124051	0.151095	0.135753	0.144465	0.120984	0.156871	0.0550008	0.0892452	0.0629498	0.080439	0.113122	0
6030466F02Rik	0	0	0	0	0.00546288	0	0	0.0172407		0	0	0	0	0	0	0	0	0	0	0	0	0	5.36282e-05	0	0	0.000282274	0	0	0	0	0	0	0	0	0	0	0	0	0	0	0	0	0	0	0
6030498E09Rik	0	0	0	0	0.00172073	0	0	0		0.00210881	0	0	0	0	0	0.000517792	0	0	0.001213	0.00172609	0	0	7.34296e-05	0	0	0.000410887	0	0	0.000335331	0	0.00164689	0	0	0	0	0	0	0	0	0	0	0	0	0	0
6230400D17Rik	0.0297501	0	0.0945799	0.0624395	0.020747	0	0	0.037817		0.0144777	0.00962137	0.013802	0	0.02106	0	0.0133054	0.0155957	0.0279529	0.0103538	0.00427291	0.014383	0.00966515	0.0135277	0	0.011096	0.0150683	0	0.00805594	0.0188661	0.0393122	0.0284567	0.0182256	0.0294281	0.0159033	0.028464	0.0213314	0.015532	0	0.0236456	0	0	0.0130771	0	0.00488058	0
6330403K07Rik	0.0163646	0.0354836	0.0151159	0.354427	0.0576018	0	0	0.022406		0.0585568	0.0178482	0.115173	0	0.137433	0.0973819	0.0443217	0.0595208	0.0782901	0.137839	0.0551579	0.211551	0.107311	0.130039	0.213334	0.120841	0.161874	0.156779	0.0545628	0.110316	0.136385	0.281732	0.0689883	0.268105	0.07106	0.024954	0.0903353	0.0376342	0.14945	0.0684883	0	0.021907	0.0495402	0	0.0416036	0
6330403L08Rik	0.0184339	0.0367368	0.0215028	0	0.00796071	0	0	0.0152049		0.00602042	0.00285447	0.00905463	0	0.00553198	0	0.0129082	0.0112503	0.00511147	0.00656086	0.014554	0.0138458	0.00479462	0.0122898	0.0168666	0	0.0117741	0	0	0.00597915	0.0101126	0.0152554	0	0.00728774	0.00757529	0.00558281	0.0055919	0.00226596	0.0106936	0.00372827	0	0	0.00735043	0.00629843	0.00201506	0
6330403N20Rik	0	0	0	0	0	0	0	0		0.000421752	0.000990255	0	0	0.000541434	0	0.000374545	0	0	0.00211278	0	0.000980803	0.000654554	0.000539872	0	0	0.000959144	0	0	0.00108326	0	0.00169497	0	0.000982713	0	0	0.000770875	0.00163219	0	0.000654362	0	0	0	0	0.00165412	0
6330418K02Rik	0.0853916	0	0.0344575	0.0749991	0.0482688	0	0	0.0794999		0.0555463	0.0312156	0.107597	0	0.0297056	0.113942	0.0400815	0.0419252	0.11711	0.0254611	0.0173296	0.0416261	0.0449674	0.0374368	0	0.081205	0.0360559	0	0.0322917	0.0497946	0.094928	0.0383075	0	0.059633	0.0628363	0.0299679	0.0526184	0.0707281	0	0.0539531	0.0187427	0.0643927	0.0413368	0.0176822	0.0513847	0
6330562C20Rik	0.0205821	0.0833709	0.0181297	0	0.0201719	0	0	0.0197943		0.019891	0.0103511	0.0323551	0	0.0353106	0.0651067	0.0152651	0.0208403	0.0198439	0.0160564	0.053157	0.0521963	0.0192369	0.0414621	0.131807	0.0182396	0.048712	0	0.00669936	0.0356854	0.0395016	0.0752922	0	0.0287831	0.0257095	0.0196527	0.0204597	0.021029	0.0303606	0.0282621	0	0.0095584	0	0.00666406	0.0190443	0
6430531B16Rik	0.00161485	0.0151676	0	0	0.0013309	0	0	0		0.00269103	0	0	0	0.00104598	0	0.00245549	0.00184067	0	0.00192101	0	0.000767395	0.00223752	0.00431674	0	0	0.00192696	0.0680828	0	0.00194735	0	0.00387355	0	0.00187002	0.00309836	0.004625	0.000880526	0.00182617	0	0.00259289	0	0.0201238	0	0	0.00401959	0
6430548M08Rik	0.117808	0.0906581	0.0940127	0	0.0422165	0	0	0.0837024		0.0376674	0.0343149	0.0826748	0.0644695	0.0347713	0.0837247	0.0288272	0.0267623	0.0264446	0.00439555	0.00941223	0.0378212	0.0234395	0.0161966	0.0660125	0.0109546	0.00926624	0	0	0.0192561	0	0.0107499	0	0.017095	0.0223438	0.0181064	0.0278936	0.0232012	0	0.0312106	0	0	0	0	0.0258442	0
6430550D23Rik	0.00391991	0.0275956	0	0	0.00411417	0	0	0.00430232		0.00126267	0.000909245	0	0	0.0037149	0	0.000804309	0.000431966	0	0.00178377	0	0.0015895	0.000302686	0.00322333	0	0.00814647	0.00181183	0	0	0.00257058	0.00408648	0.00582614	0.0286861	0.00501035	0.000656851	0	0.00197159	0.00666207	0	0.00297516	0	0	0.0324002	0	0.00104421	0
6430571L13Rik	0	0	0	0	0.000583227	0	0	0.00144048		0.000407088	0	0	0	0	0	0.000464351	0	0	0	0	0.00156308	0.0003095	0.000706972	0	0	0.000179724	0	0	0.000906178	0	0.0015549	0	0.00292983	0.00108058	0	0.00123006	0	0	0.000725135	0	0	0	0	0	0
6430573F11Rik	0.00105308	0	0.0329862	0	0.0160621	0	0	0.00901612		0.0104692	0.00140432	0.00625171	0	0.00273627	0	0.00139074	0.00400366	0.00713947	0.0114033	0.0134298	0.0079073	0.00559202	0.00924363	0	0.00933363	0.00598658	0.133296	0	0.00766974	0.0331575	0.0108037	0	0.0134703	0.00158782	0	0.00473694	0.0101043	0.0526473	0.0126469	0	0	0	0	0.0026231	0
6430573P05Rik	0.0145053	0.0479596	0.0267964	0	0.0149918	1.88537	0	0.00758913		0.00879332	0.00725771	0.0142513	0	0.0211795	0	0.00979265	0.010665	0.0213303	0.0243168	0.00765763	0.0193085	0.0152127	0.0217345	0	0.0121714	0.0307815	0.133296	0.00805594	0.0254619	0.0183775	0.0251295	0.103288	0.0207655	0.0261628	0.0110139	0.0148759	0.0151252	0	0.023894	0.0225665	0.0339122	0.0286903	0	0.0246118	0
6430584L05Rik	0.00819307	0.0216064	0.0138867	0	0.00780105	0	0	0.00695507		0.00847159	0.00630639	0.00674114	0	0.00074727	0	0.00325858	0.00274318	0.00360669	0.00785397	0.0114313	0.00809098	0.00141249	0.00834057	0	0.00814647	0.00574773	0	0	0.0141224	0	0.00342188	0	0.0131875	0.00951157	0.00579258	0.0105639	0.0100531	0	0.0151931	0	0.0174672	0.0164249	0.00865849	0.00461557	0
6430628N08Rik	0	0	0	0	0	0	0	0		0	0	0	0	0.000829575	0	0	0	0	0	0	0	0	0.000677721	0	0	0.000680533	0	0	0	0	0	0	0	0	0	0	0	0	0	0	0	0	0	0	0
6530403H02Rik	0	0	0	0	0	0	0	0		0	0	0	0	0.00374818	0	0	0	0	0	0	0	0	0.00017702	0	0	0	0	0	0.00364092	0.0105253	0	0.048369	0.00657954	0	0	0.000831045	0	0	0.00182792	0	0	0	0	0	0
6530409C15Rik	0	0	0	0	0	0	0	0		0	0	0	0	0	0	0	0.000851032	0	0	0	0	0	0.000603436	0	0	0.000313989	0	0	0.00100694	0	0	0	0	0	0	0	0	0	0	0	0	0	0	0.00078162	0
6530437J22Rik	0	0	0	0	0.00403899	0	0	0.00902393		0.00177522	0.00135118	0.00529386	0	0.00796052	0	0.00506187	0.00365499	0.00610175	0.00848265	0.00236796	0.00819348	0.0048032	0.00665007	0	0.0103239	0.00592388	0	0.101051	0.00334458	0	0.00289361	0	0.00235747	0.00526509	0	0.00168404	0.00289015	0	0.00247326	0	0	0	0	0.00313541	0
6720427I07Rik	0.00771873	0	0.0785746	0	0.0151544	0	0	0.0287231		0.00962198	0.00627684	0.00925448	0	0.0179888	0	0.0111033	0.0190709	0.0480643	0.0075474	0.0421553	0.0127448	0.00758663	0.0171686	0.036907	0.0218192	0.0113693	0	0	0.0179184	0.00999352	0.0070323	0.140519	0.0130981	0.0124705	0.00583962	0.0150669	0.0274723	0	0.0159083	0	0	0.00512215	0	0.0177098	0
6720483E21Rik	0	0	0	0	0.00136333	0	0	0		0.000720875	0.00231089	0	0	0.000644357	0.0831324	0.000483117	0.00105144	0	0	0	0.00196509	0.000957946	0.00254508	0	0	0.00252417	0	0	0.00149221	0	0.00245387	0	0.00169282	0.00373777	0	0.00156447	0.000733152	0	0.00127256	0	0	0	0	0.000361687	0
6720489N17Rik	0.0263403	0.0455862	0.0176312	0.0624395	0.0281003	0	0	0.0131819		0.0300668	0.028261	0.047818	0.0644695	0.0273879	0.126688	0.0379624	0.0600347	0.0330931	0.0483985	0.0254661	0.0315978	0.0478036	0.0415096	0.0395305	0.0577299	0.0512411	0	0.0155096	0.0475069	0	0.0379667	0	0.0427134	0.0560363	0.043122	0.0363254	0.0434095	0.0350848	0.03424	0.13286	0.0828532	0.117054	0.0609906	0.101259	0
6820408C15Rik	1.07	0.556444	0.944708	0.446476	0.348157	0	0.703878	0.895489		0.294026	0.13616	0.0315217	0	0.00637966	0	0.0104902	0.00632817	0	0.00206224	0.000986509	0.00081596	0.00540917	0.00241008	0	0.00607799	0.00136478	0	0	0.00387388	0	0.0133503	0	0.000465639	0.0103171	0	0.000342423	0.00470964	0	0.00186799	0	0	0	0.0163879	0.00338808	0
6820426E19Rik	0	0	0	0	0.000282245	0	0	0		0.00259707	0.00382012	0	0	0	0	0.000184705	0.000305546	0	0	0	0	0.00053338	0.000337637	0	0	8.24316e-05	0	0	0	0	0	0	0	0	0	0	0	0	0	0	0	0	0	0.000489821	0
8030423F21Rik	0	0.0239798	0	0.0489541	0.00486714	0	0	0.00326057		0.00924834	0.00443573	0.00466969	0	0.00771749	0	0.00298084	0.000418484	0.00207574	0	0.000806406	0.00198094	0.00165749	0.00175004	0.0271084	0	0.00092285	0	0.0470013	0.00350092	0	0.0133231	0	0.00344181	0.00183056	0	0.000803717	0.00274983	0	0.00177605	0	0	0	0	0.000517023	0
8030442B05Rik	0	0	0	0	0	0	0	0		0.00420941	0	0	0	0	0	0.000892278	0	0	0	0	0	0	0	0	0	0	0	0	0	0	0	0	0	0	0	0	0	0	0	0	0	0	0	0	0
8030462N17Rik	0.00628223	0.0466744	0	0	0.0165976	0	0	0.00150896		0.0117763	0.00408719	0.00282237	0	0.00490362	0	0.015098	0.0125316	0.00333156	0.00445637	0	0.0075658	0.0122585	0.00768801	0	0.0129206	0.00703222	0	0	0.00887445	0.0226087	0.00746857	0	0.00414828	0.00311527	0.00716541	0.00501247	0.00520777	0	0.00697751	0	0.0194401	0.00512215	0.0198194	0.00728435	0
8030474K03Rik	0	0	0	0	0.000609066	0	0	0		0.000783233	0.000768789	0	0	0.00139591	0	0.000738935	0.00540232	0	0.0162311	0.00219388	0	0.00718429	0.00401866	0	0	0.00170613	0	0	0.00177152	0	0.000813353	0	0	0.00389425	0	0	0.00413747	0	0	0	0	0	0	0.00888703	0
8430408G22Rik	0	0	0.0481205	0	0.00786819	0	0	0.0106384		0.000120155	0.0943396	0.199454	0	0.0024125	0.0867656	7.05998e-05	0.00174817	0.012507	0	0.00165533	0.0118251	0	0.00294019	0	0	0.0020634	0	0	0.00106065	0	0	0	0.00236823	0	0	0.00498997	0	0	0.0132649	0	0	0	0	0.00415743	0.226783
8430423G03Rik	0.0014681	0.0426136	0	0	0.00142143	0	0	0		0.00261023	0.00684159	0.0099974	0	0.0056929	0	0.0102199	0.00951628	0.00327257	0.00793584	0.0338406	0.00635242	0.00881557	0.00879068	0	0.00552093	0.0158063	0	0	0.00793709	0	0.00454975	0	0.00248443	0.0142482	0.0210176	0.00404049	0.00649378	0.0312611	0.00717085	0.0230918	0.0095584	0.0208161	0.0410604	0.00849512	0
8430432A02Rik	0.00082282	0	0	0	0.000761493	0	0	0.00296349		0.000696236	0.00471991	0	0	0.00191178	0	0.000696971	0.000656443	0.00164859	0.00320345	0	0.00219542	0.00252841	0.00101792	0	0.00465157	0.000700021	0	0	0.00263262	0.0120192	0.000664374	0	0.0017993	0.00736597	0	0.00183006	0	0	0.00385509	0	0	0	0	0.00137563	0
8430436N08Rik	0	0	0	0	0.00135356	0	0	0		0.00123226	0	0	0	0.00712334	0	0.000725571	0.000819676	0	0.0026233	0	0.00120561	0.00123496	0.00203789	0	0	0.00075916	0	0	0.00105287	0	0.00269255	0	0.000933227	0.00250639	0.0023287	0.00172827	0	0	0.00072708	0	0	0	0	0	0
9030025P20Rik	0.0272271	0	0.026804	0	0.0130425	0	0	0.0170202		0.016056	0.0972269	0.0244198	0	0.0105231	0	0.0108671	0.0107977	0.0092961	0.0157518	0.00435229	0.0139137	0.0117986	0.0109033	0.0427846	0	0.0163754	0	0.0060885	0.0152333	0.0344031	0.0304232	0	0.0303094	0.0219164	0.0233377	0.0274947	0.025583	0	0.0207439	0.0401454	0	0.00795499	0.0399375	0.0158717	0
9030612E09Rik	0	0.0471378	0	0	0.00192472	0	0	0.00152002		0.000523177	0.00141843	0.0155025	0	0.013244	0	0.00946806	0.00996202	0.0319196	0.0308545	0.02315	0.0411342	0.0112397	0.0255898	0.0298608	0.0179977	0.0309112	0	0.0567821	0.0312979	0	0.0441736	0	0.0246234	0.0171054	0.0256222	0.0324855	0.0185687	0.0218347	0.041704	0.0538758	0.0152835	0.0184145	0	0.012374	0.221361
9030624G23Rik	0.00845461	0.0490927	0.0172626	0.0903342	0.0334526	0	0	0.0441669		0.022506	0.0140804	0.00909025	0.0525547	0.0121355	0	0.00948262	0.0110035	0.0143221	0.0109546	0.00552113	0.0140413	0.0181294	0.0135062	0	0.0236487	0.0102376	0	0.0060885	0.0130234	0	0.00663037	0	0.00656214	0.0100732	0.012895	0.0133311	0.00645213	0.0218347	0.0088119	0	0	0.022919	0	0.0192126	0
9030624J02Rik	0.429857	0.283135	0.505427	0.92416	0.364889	0.192086	0.703878	0.357703		0.463628	0.184154	0.330121	0.210136	0.319941	0.290097	0.371735	0.323682	0.396349	0.497607	0.685474	0.295114	0.379033	0.294503	0.507933	0.361026	0.496113	0.299781	0.509293	0.396338	0.367438	0.500136	0.398512	0.43357	0.437483	0.342858	0.462346	0.445425	0.296735	0.377596	0.527368	0.455541	0.304838	0.486612	0.395388	0
9130008F23Rik	0.142797	0.204382	0.149739	0	0.105131	0	0	0.0896772		0.0912374	0.0509319	0.067361	0.0722439	0.0810877	0.123055	0.106043	0.0697309	0.0880408	0.0508791	0.0573491	0.0595182	0.0520133	0.0592581	0.133104	0.0683908	0.0620503	0.57574	0.0581976	0.0706157	0.0412687	0.11221	0	0.0935868	0.119221	0.112041	0.096349	0.115786	0.0953373	0.084585	0.019082	0.0253338	0.0270202	0.0495311	0.0635392	0
9130011E15Rik	0.0212392	0	0	0	0.0113479	0	0	0.0211537		0.0202368	0.00865117	0.0649582	0	0.00731056	0	0.0145132	0.0111817	0.00403902	0.00931119	0.0288218	0.0145218	0.0190848	0.00875273	0	0.0260264	0.0123435	0	0.00786807	0.010267	0.0116527	0.0125923	0	0.0119117	0.0118055	0.0117751	0.0122711	0.00923855	0	0.0108581	0	0.011108	0	0.00629843	0.012977	0
9130015A21Rik	0.00947098	0.0196919	0	0	0.00185645	0	0	0.00358913		0.00514929	0.00109111	0	0	0.0034213	0	0.0114337	0.00551689	0	0.000800368	0.00450699	0	0.00308138	0.000827038	0	0	0.000326013	0	0.00805594	0	0	0	0	0	0.00538829	0	0	0.00018016	0.00591453	0	0	0	0	0.00885369	0	0
9130019O22Rik	0.02107	0.079647	0.0665831	0	0.0379323	0	0	0.0443297		0.0200573	0.102639	0.0314197	0	0.0252414	0.0380987	0.0159928	0.0232224	0.0261312	0.0216408	0.0152991	0.0347166	0.0209306	0.0331804	0.0252471	0.0356538	0.0243068	0.108751	0.0249775	0.0386275	0.0286001	0.0329013	0.167837	0.0544288	0.0255273	0.0221455	0.045776	0.0354448	0.0266143	0.0401018	0	0.0345928	0.0376283	0	0.0276296	0.194382
9130023H24Rik	0.0221683	0.0227791	0.00987933	0	0.0217862	0	0	0.0269599		0.0162096	0.0298738	0.0465589	0	0.0243391	0.0524973	0.0210958	0.038195	0.0564689	0.038038	0.0668107	0.0405628	0.0240845	0.0379101	0.102514	0.0117499	0.0273202	0	0	0.0350399	0	0.0200918	0	0.0289529	0.0269637	0.0114343	0.0289005	0.0223125	0.0439991	0.0362147	0.0761717	0	0.0622691	0	0.024607	0
9130204K15Rik	0	0	0	0	0.00278548	0	0	0.00956298		0	0.00151798	0	0	0.000985723	0	0	0.000335504	0	0	0	0	0	0.000452045	0	0	0.000461456	0	0	0.000120052	0	0	0	0	0	0	0	0	0	0	0	0	0	0	0	0
9130213A22Rik	0.00180168	0	0.0119332	0	0.00765425	0	0	0.0123746		0.00284034	0.00167175	0.00496673	0	0.00296755	0	0.00609918	0.00743333	0.0112793	0.0166046	0.0217051	0.0210499	0.00451102	0.020651	0	0.0433805	0.0246026	0	0	0.0169398	0.0104784	0.00733515	0.0509103	0.00932705	0.0178135	0.0221865	0.0147497	0.0171219	0	0.00997237	0	0	0	0.00829939	0.00744394	0
9130221H12Rik	0.0252422	0.0883837	0.0209928	0	0.0257205	0.192086	0	0.0405752		0.0189897	0.00977719	0.0162761	0	0.0198862	0	0.0216298	0.0266049	0.0324794	0.0153496	0.134678	0.0419129	0.0210914	0.0372422	0.020186	0.011096	0.0244044	0	0.00669936	0.0418915	0.0510662	0.02792	0.106888	0.0444877	0.0249299	0.0416699	0.0454253	0.0360453	0.0906187	0.0645736	0.0395644	0.0625168	0.053403	0.0096749	0.0316243	0
9130230L23Rik	0.00593261	0	0.0373539	0	0.029344	0	0	0.0190505		0.0178034	0.0182307	0	0	0.00447682	0	0.00942965	0.00242481	0.0021629	0	0	0.000895853	0.000438734	7.55471e-05	0	0	0.00048045	0	0.0358012	0.00204467	0	0.0140412	0	0.00447287	0.00926484	0.00935082	0.000629164	0.00319518	0	0.000122545	0	0	0	0	0	0
9130401M01Rik	0.414009	0.351287	0.26255	0.312184	0.365078	0.153544	0	0.31199		0.433125	0.304964	0.612885	0.592544	0.399352	0.22094	0.555757	0.591623	0.565217	0.466555	0.240953	0.521518	0.537474	0.538601	0.331636	0.504613	0.438123	0.25246	0.381925	0.525469	0.527066	0.288563	0.238602	0.411918	0.485278	0.667998	0.553733	0.447613	0.52637	0.490746	0.406295	0.511604	0.560847	0.366896	0.442327	0.553449
9130604C24Rik	0.00617984	0.0275956	0.0103096	0	0.0088923	0	0	0.00970683		0.00453599	0.00641831	0.014948	0	0.0106595	0	0.00638574	0.00669775	0.00539125	0.00374236	0	0.00502787	0.00469916	0.00590719	0	0	0.00455016	0	0	0.00459746	0	0.00755046	0	0.00422991	0.0044378	0.0105762	0.00857159	0.00221828	0	0.00693673	0	0	0.022919	0	0.0128434	0
9230104L09Rik	0.0793532	0	0	0	0.0143193	0	0	0.0655184		0.0027754	0.00302616	0	0	0	0	0.000810259	0.000449736	0	0	0	0	0	0.000690115	0	0	0.000992412	0	0	0.000198631	0	0	0	0	0	0	0	0.00172313	0	0	0	0	0	0	0	0
9230104M06Rik	0	0	0	0	0	0	0	0		0	0	0	0	0	0	0	0.000589662	0	0	0	0	0	0.00018423	0	0	0.000141289	0	0	0.000503142	0	0	0	0	0	0	0	0	0	0	0	0	0	0	0.00151723	0
9230110C19Rik	0.0374264	0	0.0260229	0.0606767	0.0284184	0.192086	0	0.0366057		0.0329868	0.00782304	0.0250802	0.0525547	0.0273457	0.0651067	0.026132	0.0245591	0.0134537	0.0198669	0.0563704	0.0213632	0.0269445	0.018698	0.063919	0.0197617	0.0204996	0	0.0124434	0.0216045	0.00830973	0.0311179	0	0.0201055	0.0199043	0.0118467	0.019098	0.0151373	0.0353526	0.0184159	0.0542719	0.0174672	0.00949689	0.0145898	0.0160564	0
9230111E07Rik	0.00491263	0	0.0103758	0	0.00206712	0	0	0.00443384		0.00120448	0	0.00193555	0	0.00254857	0	0.00077099	0.000641327	0.00148134	0	0	0.00123564	0.000671954	0.00151182	0	0	0.00122273	0	0	0.000982464	0	0.000158515	0	0.000616259	0	0	0	0	0	0.000391761	0	0	0	0.0131003	0	0
9230112J17Rik	0	0	0	0	0.000718129	0	0	0		0.00289033	0.00174419	0	0	0.000481639	0	0.000986333	0.000974461	0	0	0	0.00156435	0.00131694	0.000430419	0	0	0	0	0	0.000367469	0	0	0	0.000585029	0.0003672	0	0.000378805	0	0	0	0	0	0	0	0	0
9230116L04Rik	0.00264292	0	0	0	0.00066172	0	0	0		0.000326332	0	0	0	0	0	0.000767404	0	0	0.00114737	0	0	0.000475837	0.00075853	0	0	0.000516485	0	0	0.00051018	0	0	0	0	0	0.00118575	0	0	0	0	0	0	0	0	0.00066559	0
9330020H09Rik	0.03599	0.0213532	0.0422768	0	0.0336805	0	0	0.0232114		0.026027	0.0353755	0.0257762	0.152583	0.0243508	0.0968843	0.0260839	0.0309984	0.0121898	0.0149238	0.0172926	0.0181784	0.0195175	0.0303981	0	0.0495827	0.030307	0.0680828	0.0124434	0.0228012	0.0672833	0.0140613	0.0224325	0.0174869	0.0226694	0.0215941	0.0151227	0.0148724	0.0228365	0.017483	0	0.0689554	0.0333687	0	0.0332338	0
9330102E08Rik	0	0	0	0	0.000267384	0	0	0		0.000732386	0	0	0	0.0014521	0	0.000675309	0	0	0.00191687	0	0	0.000603146	0.000619994	0	0	0.000269967	0	0	0.00157292	0	0.00075958	0	0.00219982	0	0	0.000911708	0	0	0.000735059	0	0	0	0	0	0
9330104G04Rik	0.00289744	0	0.0153067	0	0.0120838	0	0	0.0086128		0.0105878	0.00323147	0.00490493	0	0.0140317	0.121823	0.00752748	0.0126103	0.00264251	0.0188395	0.0335736	0.0174249	0.0154341	0.0229929	0	0.0126985	0.0269144	0	0	0.013945	0.0176302	0.0229228	0	0.0151455	0.00778506	0.00884328	0.00843024	0.00674699	0.00591453	0.0123428	0	0	0.0357041	0.0117319	0.0128701	0
9330111N05Rik	0	0	0	0	0	0	0	0		0	0	0	0	0	0	0	0	0	0	0	0.00119024	0	0.000616359	0	0	0.000565439	0	0	0.000498898	0	0	0	0.000467207	0	0	0.000354142	0	0	0.0011105	0	0	0	0	0.000400361	0
9330121J05Rik	0	0	0	0	0	0	0	0.00163738		0.000569077	0.00336495	0	0	0.000961535	0	0.00037046	0.00250963	0.00259072	0.00396454	0.00491757	0.00211319	0.000988213	0.00341606	0	0	0.00327009	0	0	0.00178158	0.0125009	0.00150139	0	0.00117147	0.000464561	0.00265202	0.000335422	0	0	0.000913831	0	0	0.0099724	0	0.00157386	0
9330136K24Rik	0.00685157	0	0	0	0.00143189	0	0	0		0.00128195	0	0	0	0.0032532	0	0.00145187	0.00205298	0.00342716	0.00114998	0	0.00273106	0.000649631	0.00309032	0	0	0.00278141	0	0	0.00488138	0	0.00097954	0	0.00499245	0.00400211	0	0.0038373	0.00606345	0	0.00506953	0	0	0	0	0.00480344	0
9330158H04Rik	0.0035295	0	0.0118124	0	0	0	0	0		0.000923171	0.00174419	0	0	0	0	0.000421081	0.00082706	0	0	0	0.0025845	0.00362196	0.00141166	0	0	0.000221377	0	0.0077647	0.00138204	0	0.00101188	0	0.0019274	0	0	0.0011553	0	0	0.00317416	0	0	0	0	0	0.226783
9330159F19Rik	0.00200388	0	0.0105987	0.0690217	0.000974653	0	0	0.00888998		0.00125028	0.0036944	0.0392575	0	0.0271148	0	0.00484758	0.0226638	0.0146645	0.00355654	0	0.0324356	0.000547599	0.00642036	0.0921671	0	0.0126514	0.214316	0.0628141	0.0630958	0.0774737	0.0864939	0.0265508	0.174171	0.0338017	0.0231156	0.085384	0.0558751	0	0.0760107	0.028983	0	0.0107438	0.0272582	0.0237057	0.194382
9330160F10Rik	0.0111324	0.0188421	0.13089	0	0.023246	0	0	0.016638		0.0169263	0.0197539	0.0223811	0	0.0295783	0	0.0167095	0.0198918	0.034892	0.0253387	0.0527755	0.0303511	0.0199544	0.0299411	0.0319922	0	0.0308855	0	0.0776703	0.0332064	0.0450433	0.0263824	0	0.02885	0.0235613	0.0254214	0.022152	0.0271061	0.057188	0.0298213	0	0	0.0272219	0	0.0258202	0
9330161L09Rik	0	0	0.0116277	0	0	0	0	0		0.00018537	0.00287216	0	0	0.00118473	0	0.000219558	0.000553541	0	0	0	0	0.000848662	0.000491715	0	0	0.000397289	0	0	0.000898009	0.0125009	0	0	0.0015598	0.000839916	0	0.00141629	0.00113822	0	0.0022419	0	0	0.00577133	0	0.000635804	0
9330175E14Rik	0.015356	0	0.0153067	0	0.00762712	0	0	0.0232741		0.00403071	0	0	0	0.0052554	0	0.00284172	0.00400664	0	0	0	0.00254376	0.00124265	0.0019325	0	0	0.000965811	0	0	0.000732146	0	0.00059642	0	0.00246297	0.00130094	0.00323452	0.00172304	0.00162932	0	0.00059928	0	0	0	0.00458641	0	0
9330175M20Rik	0	0	0	0	0	0	0	0		0.00137112	0	0	0	0	0	0.000733416	0	0	0.000914871	0	0	0	0	0	0	0	0	0	0	0	0.000355968	0	0	0	0	0	0	0	0	0	0	0	0	0	0
9330179D12Rik	0.00625092	0.047543	0.0400918	0.154816	0.00716236	0	0	0.00752439		0.0105105	0	0.0102938	0	0.0171095	0	0.00896113	0.00835866	0.00850063	0.0168559	0	0.0141451	0.0117565	0.0109351	0	0	0.0153447	0	0	0.0161079	0	0.0350108	0.0455639	0.0301498	0.0206465	0.0155729	0.0213392	0.0238097	0	0.0162573	0	0	0.0158116	0.00458641	0.0125131	0
9330182L06Rik	0.0313387	0.0478577	0	0	0.0115492	0	0	0.0179301		0.0119342	0.0138288	0	0	0.00144623	0	0.000942694	0.000189676	0	0.00131221	0	0	0.000599809	0	0	0	0.000483145	0	0	0.00046792	0	0.00147702	0	0	0.00109603	0	0	0.00138195	0	0	0.0192232	0.0165886	0	0	0.000724923	0
9330198N18Rik	0.0121214	0	0	0	0.00723553	0	0	0.0029308		0.00829431	0.00141843	0	0	0.00224427	0	0.00273022	0.0052018	0	0.00257933	0.0359874	0.000573892	0.00522151	0.00167049	0.020186	0	0.00178649	0	0.0124434	0.000967208	0	0.00341481	0	0.00116552	0.00291016	0.003201	0.00206757	0	0	0.000772977	0	0	0	0	0	0
9430002A10Rik	0.000882689	0	0	0	0.00200804	0	0	0.0127474		0.00426554	0	0	0	0.00334175	0	0.00261932	0.00136211	0	0.00386113	0	0.00256413	0.00295404	0.00298432	0	0	0.00368404	0	0	0.00277655	0	0.00172915	0	0.00135874	0.00500898	0	0.00234126	0.00286152	0	0.00323824	0	0	0	0	0.00132677	0
9430015G10Rik	0.0262222	0.0215692	0.0178315	0.0749991	0.0136018	0	0	0.00534221		0.0169342	0.0321676	0.0278521	0	0.013906	0.0685453	0.0224959	0.0351227	0.0424647	0.0106941	0.0177208	0.0192839	0.0154537	0.0198337	0.020186	0.00724016	0.0176541	0.0998363	0.00805594	0.0186509	0.0224899	0.0179887	0.121886	0.0225778	0.0164337	0.0109438	0.0191585	0.0167671	0.0986672	0.0202866	0.0722006	0.0614849	0.076192	0.0228904	0.0697208	0.503651
9430018G01Rik	0.00654716	0	0	0	0	0	0	0		0.00288909	0	0	0	0	0	0.000363066	0	0	0	0	0	0	0	0	0	0	0	0	0	0	0	0	0	0	0	0	0	0	0	0	0	0	0	0	0
9430037G07Rik	0.0137919	0	0	0	0.0248833	0	0	0.00334941		0.00636868	0.00606078	0	0	0.0055382	0	0.0142465	0.0098238	0.00376501	0.0105944	0.00753095	0.00757076	0.0078994	0.00759209	0	0.0129206	0.00848466	0.221725	0.0845553	0.00990088	0	0.00760942	0.0356084	0.0056335	0.0110661	0.0107033	0.00729899	0.00549172	0	0.00473791	0.0264845	0.0202491	0.0578585	0.0242943	0.0283126	0
9430038I01Rik	0.121752	0.0681431	0.120558	0.0527869	0.104017	0	0	0.113941		0.149947	0.075565	0.149008	0.105027	0.118551	0.369265	0.141783	0.108455	0.173113	0.148245	0.0336784	0.119704	0.136198	0.134482	0.0907484	0.209791	0.162269	0.090763	0.088527	0.170872	0.163783	0.165288	0.0990077	0.187608	0.17741	0.134647	0.172389	0.190949	0.235889	0.216713	0.106359	0.324726	0.191385	0.174927	0.128752	0.194382
9430060I03Rik	0.00994626	0	0.0349646	0	0.0109618	0	0	0.0170485		0.00412981	0.00714627	0.0704572	0	0.0140876	0	0.00501837	0.00470164	0.00723199	0.00430737	0.00319614	0.00562358	0.00163208	0.0103632	0	0	0.00962402	0	0.0689604	0.0136052	0.00713586	0.0127508	0	0.0188636	0.00638645	0.0150361	0.0153085	0.0189325	0	0.0183847	0	0	0.0126224	0	0.0166456	0
9430065F17Rik	0.00668341	0	0.00839497	0.0489541	0.0121266	0	0	0.00559209		0.00818568	0.0104775	0.0135679	0	0.0164326	0.031522	0.0190596	0.0137616	0.0326495	0.0265965	0.0181655	0.0265196	0.019085	0.0253121	0.0256326	0.0320542	0.0292566	0.0991631	0.00614628	0.0260223	0.0244909	0.0491364	0.0503239	0.0198823	0.0230201	0.00833092	0.019283	0.0221369	0	0.0165115	0	0	0.0523185	0.0138859	0.0199533	0
9430078K24Rik	0	0	0	0	0.00584811	0	0	0		0.00448552	0	0.00470601	0	0.00601419	0.0324005	0.00639876	0.00426131	0.0458349	0.0104917	0.000986509	0.00602024	0.00876842	0.00408236	0	0.0172298	0.00374893	0.0632511	0	0.0143115	0.024151	0.0133682	0	0.0108778	0.00441047	0.0160285	0.0116136	0.0128834	0	0.0142632	0	0	0.0145744	0	0.00767303	0
9430085M18Rik	0.011627	0	0	0	0.0229465	0	0	0.00930862		0.0244663	0.00732199	0.00883235	0	0.0241342	0.0685453	0.0114757	0.0102804	0.0218675	0.0114082	0.00408873	0.0237519	0.0167043	0.0164795	0.0422183	0.0353017	0.022132	0	0.00863856	0.0161541	0.0074849	0.0296285	0.0888702	0.0147825	0.0105532	0.00669274	0.0141158	0.0112901	0	0.0135462	0	0	0.0100664	0.00426728	0.00802925	0
9430098F02Rik	0	0	0	0	0.000436656	0	0	0.00536776		0	0.000824114	0	0	0	0	0	0	0	0	0	0	0	9.78841e-05	0	0	0.000260709	0	0	0	0	0	0.0182256	0	0	0	0	0	0	0	0	0	0	0	0	0
9530020I12Rik	0	0	0	0	0	0	0	0		0	0	0	0	0.000599319	0	0	0.000279705	0	0	0.00269174	0	0	0.000201052	0	0	0.000654423	0	0	0.00152097	0	0	0	0	0	0	0	0	0	0	0	0	0	0	0	0
9530026P05Rik	0.0527741	0.0275956	0.121394	0	0.0634649	0	0	0.0895356		0.0200256	0.0122631	0.0166535	0	0.0183123	0	0.00796759	0.0102026	0.0221538	0.0112862	0.00516089	0.0170177	0.00960067	0.0118526	0.0828073	0.0121206	0.0102087	0	0	0.0210415	0.0125009	0.012456	0	0.0391269	0.00542964	0.00731157	0.0218542	0.00973491	0.0106936	0.0344853	0	0	0	0	0.00189594	0
9530027J09Rik	0	0	0	0	0	0	0	0		0	0	0	0	0	0	0	0.00055009	0	0	0	0	0	0.000242368	0	0	0.000752528	0	0	0.00017468	0	0	0	0	0	0	0	0	0	0	0	0	0	0	0	0
9530034E10Rik	0.00816852	0	0.0191905	0	0.0115279	0	0	0.0209047		0.00703304	0.00384899	0.00186056	0	0.00793875	0	0.00897996	0.0129911	0.0111641	0.0105039	0.0269111	0.0180203	0.0175114	0.0151293	0	0	0.013294	0	0.0077647	0.0125599	0.0106605	0.00718016	0	0.0165999	0.00483372	0.0134317	0.0192905	0.00733215	0	0.0162985	0	0	0.0162418	0	0.0139245	0
9530036M11Rik	0.0140951	0	0	0	0.00238223	0	0	0.0145565		0.00229232	0.00224165	0	0	0	0	0.00047475	0.000469443	0	0	0	0	0	0.000125877	0	0	6.53152e-05	0	0	0.000403913	0	0	0	0	0.00327749	0	0	0	0	0	0	0	0	0	0	0
9530046B11Rik	0.00161485	0	0	0	0.00153348	0	0	0		0.00223215	0.00158586	0	0	0.0030523	0	0.00106062	0.000870602	0	0.0029213	0.0108122	0.000713714	0.00295739	0.00239035	0	0	0.00213986	0	0	0.00267225	0.00796081	0.00180955	0.0692962	0.00129275	0.00272717	0	0.000208975	0.00258148	0	0.00150952	0	0.0165886	0	0	0.00405037	0
9530052C20Rik	0	0	0	0	0.000831874	0	0	0		0.00151429	0	0	0	0.00401718	0	0.000579676	0.000201599	0	0	0	0.00110754	0.00125297	0.000628348	0	0	0.000536846	0	0	0.000126412	0	0.0011828	0	0.000247148	0.000823545	0	0.000255711	0	0	0.0011296	0	0	0.0136094	0	0	0
9530053A07Rik	0.0283139	0.0196919	0.00783676	0	0.00583035	0	0	0.010809		0.0103082	0.00348924	0.0171438	0	0.00294076	0	0.00810939	0.00226854	0.00139248	0.00277293	0	0.00196894	0.00384416	0.000837274	0	0	0.00194657	0	0	0.00125962	0	0.00534236	0	0	0.00332687	0.00147876	0.00016634	0.00114744	0	0.000182793	0	0	0	0	0	0
9530059O14Rik	0.0116614	0	0	0	0.0017572	0	0	0.00849062		0.00119367	0.00377243	0	0	0	0	0.000367504	0.000286778	0	0	0	0	0	4.8945e-05	0	0	0	0	0	0.000123105	0	0	0	0	0	0	0	0.000540722	0	0	0	0	0	0	0	0
9530068E07Rik	1.37686	1.44002	1.13666	1.00297	1.34934	0.537716	0	1.23529		1.26409	0.751243	1.47937	1.15648	1.27148	1.52556	1.15307	1.2009	1.61175	1.30038	1.44815	1.3234	1.12539	1.3189	1.64342	1.10583	1.52896	1.26774	1.64373	1.62027	1.37734	1.23418	1.50517	1.22341	1.64393	1.80774	1.59822	1.559	2.02889	1.44308	1.32453	1.45205	1.37621	1.14602	1.59312	2.26538
9530077C05Rik	0.0955219	0.0275956	0.0584233	0	0.0456039	0	0	0.0589379		0.0437882	0.0250112	0.0766248	0.152583	0.0394996	0	0.0451352	0.0394445	0.0742203	0.0439925	0.0513962	0.0388732	0.0319584	0.0250337	0.0493825	0.024724	0.0373693	0	0.0483874	0.0452191	0.0423374	0.0519512	0.0286861	0.0691256	0.0630146	0.0341863	0.0598021	0.0374279	0	0.0534736	0.113369	0.107386	0.217298	0.168817	0.0980098	0.226783
9530082P21Rik	0.0624229	0	0.0741336	0	0.0407845	0	0	0.0363614		0.0268866	0.00984186	0.0459517	0	0.0731365	0	0.0175613	0.0287481	0.0749876	0.0639614	0.0487606	0.0530577	0.03733	0.0534038	0.0901767	0.0273362	0.0424772	0.0954153	0.00669936	0.069288	0.140294	0.0450453	0	0.0844461	0.04005	0.0368905	0.0507829	0.0674167	0	0.068897	0.0192232	0.0344496	0.028434	0	0.0337357	0
9630002D21Rik	0	0	0	0	0.000679194	0	0	0.0041196		0.00147067	0.00333003	0	0	0.00484381	0	0.00184706	0.00309352	0.00429052	0.0110239	0	0.0126605	0.00505204	0.00676897	0	0	0.00460257	0	0.0155096	0.0123083	0.0231586	0.0367846	0	0.004733	0.0153738	0.0102022	0.00535487	0.0160697	0	0.00368024	0	0	0	0	0.00495176	0
9930004E17Rik	0.00641896	0	0	0	0.00273462	0	0	0		0.002436	0.000762698	0	0	0.00300819	0	0.00359897	0.00167177	0.00241607	0	0.0441287	0.00386915	0.00168188	0.00356064	0	0	0.00275243	0	0	0.000882167	0	0	0	0.00222937	0.00281998	0	0.00143203	0	0	0.00170107	0	0	0	0.0124549	0.000907172	0
9930012K11Rik	0.273645	0.204196	0.214056	0.190375	0.0712086	0	0	0.263698		0.0788138	0.111081	0.0996752	0.169496	0.0145611	0	0.0154828	0.026099	0.0215113	0.0584098	0.0412291	0.0356341	0.0416248	0.056753	0.0562967	0.0198393	0.0648456	0.0991631	0.0354912	0.0340943	0.0219301	0.0315716	0	0.0262343	0.0257372	0.0324326	0.019438	0.0235973	0.00591453	0.0268038	0.0556011	0.0506972	0.0108935	0.0301189	0.0545203	0
9930021J03Rik	0.112417	0.186585	0.138679	0.0624395	0.121946	0	0.703878	0.152927		0.109552	0.141337	0.150586	0.269607	0.161595	0.439807	0.126237	0.134315	0.258669	0.161389	0.219843	0.201023	0.107812	0.165338	0.220053	0.132407	0.155159	0.0865179	0.0590766	0.190372	0.209117	0.167384	0.21647	0.199039	0.174907	0.206678	0.216162	0.189613	0.270485	0.237574	0.170043	0.193482	0.196625	0.255769	0.157377	0.226783
9930104L06Rik	0.0451288	0	0.053109	0	0.0226158	0	0	0.0675632		0.0252556	0.0144712	0.0418112	0	0.0264807	0.177979	0.0241413	0.0303854	0.02114	0.0253428	0.081359	0.0399504	0.0169897	0.028706	0.0780237	0.0430261	0.0282937	0	0.0300001	0.0357299	0.0527894	0.0235843	0	0.0457704	0.0218092	0.028417	0.0404904	0.0332047	0	0.0483527	0.0463371	0.0471632	0.0168473	0.0246689	0.0388086	0.388765
9930111J21Rik1	0.00339744	0	0	0	0	0	0	0.00890149		0.00228571	0.00200424	0	0	0	0	0.00218733	0.00131699	0.00406885	0	0	0.00101163	0.000810022	0.00216123	0	0	0.00310302	0	0	0.000360953	0	0.000423362	0	0.00021724	0	0.00809715	0.00173326	0.000953466	0	0.000176345	0	0.0250344	0	0	0.00108793	0
9930111J21Rik2	0.200898	0.242376	0.214473	0	0.141986	0	0	0.257944		0.068256	0.100101	0.0635896	0	0.0624827	0	0.0634745	0.0905285	0.0366473	0.0587913	0.065013	0.0785145	0.0513884	0.15027	0	0	0.129099	0	0.0139152	0.0595863	0.0539377	0.0224713	0.0502984	0.0242421	0.0725233	0.193996	0.054254	0.0524312	0.0579573	0.0434877	0.0765786	0.0157642	0.0995874	0.0621411	0.1027	0
a	0	0	0	0	0.0172632	0	0	0.00521461		0.0095272	0.000866949	0	0	0.0031277	0	0.000928817	0	0	0	0	0	0.000328291	0.000302773	0	0	0.000529393	0	0	0.00346703	0	0.00795479	0	0.00137943	0.000806123	0.00786966	0.00202187	0.000270361	0	0.00163205	0	0.0161044	0	0	0	0
A030001D20Rik	0.0290434	0.0443855	0.0256191	0	0.0206426	0	0	0.0433843		0.0271755	0.0174686	0.0380478	0	0.0167728	0.0376012	0.0130006	0.0113551	0.00598604	0.0144078	0.0134438	0.00465289	0.0080086	0.0084284	0	0	0.00633941	0	0	0.0109907	0	0.0144509	0.01469	0.00838737	0.00836176	0.00570887	0.00667266	0.0091458	0	0.00834067	0.0360935	0.0157642	0.0563562	0.0168465	0.0226742	0
A030005L19Rik	0.00274614	0	0.00879657	0	0.0058125	0	0	0		0.00270537	0.00192868	0.00339778	0	0.00491165	0	0.00212377	0.00188904	0.00295979	0.00551795	0.0268852	0.00471084	0.00193019	0.00162449	0	0	0.00149494	0.0632511	0.0249775	0.000959326	0	0.00506666	0	0.00173582	0.00149014	0.00825524	0.00208374	0	0.0215974	0.00229185	0	0	0.0181855	0	0	0
A130010J15Rik	0.0608846	0.0620177	0.0928661	0.121353	0.0709099	0.192086	0	0.0520717		0.0575593	0.0247911	0.0753301	0	0.0599621	0.20364	0.0608306	0.0681134	0.0624601	0.0723596	0.127002	0.0788416	0.0725794	0.0891733	0.115242	0.103354	0.101957	0	0.0222085	0.0906256	0.049371	0.0558137	0.0597168	0.0673334	0.0622337	0.0690237	0.0844789	0.0925028	0.0756342	0.0806478	0.028983	0.0603556	0.139708	0.0386643	0.103446	0
A130051J06Rik	0.0955401	0.058631	0.0383941	0	0.0871618	0	0	0.0641949		0.0421866	0.0205608	0	0.0525547	0.017882	0	0.0180258	0.00973006	0.00392546	0.0279356	0.00257384	0.0156548	0.0116518	0.0190081	0	0	0.0184008	0	0.0934929	0.0116619	0	0.0119276	0	0.00786102	0.0165121	0.0162296	0.011726	0.0186637	0	0.00945111	0.0244388	0	0.00556654	0.0140118	0.0120837	0
A130077B15Rik	0	0	0	0	0	0	0	0		0.000463298	0	0	0	0	0	0.000522351	0.000469881	0	0	0.00634679	0	0.000492644	0.00061124	0	0	0.000649879	0	0	0.000739042	0	0	0	0.000635621	0.00181481	0	0.000966134	0.00102505	0	0.00087846	0	0	0	0	0	0
A230001M10Rik	0	0	0	0	0.00195976	0	0	0		0.0003053	0	0.0167464	0	0	0.0429415	0.00127078	0.000206812	0.0135477	0	0.00970332	0.00418961	0	0.00126996	0	0.0065794	0.00089734	0	0	0.00849856	0.0217068	0.0173806	0	0.0080412	0.025146	0.0148577	0.0607065	0.020775	0	0.0150557	0	0	0	0.0136571	0	0
A230005M16Rik	0	0	0	0	0.00136344	0.628694	0	0		0.000473122	0	0.0256076	0	0.0020556	0	0.000953054	0.000951083	0.00384991	0	0	0.000535718	0.000632358	0.000832892	0	0	0.000764569	0	0.125628	0.0108438	0.0194261	0.029764	0	0.0143582	0.00197186	0	0.00155772	0	0	0	0	0	0	0	0	0
A230020J21Rik	0.00475546	0	0	0	0	0	0	0		0.00129444	0	0	0	0	0	0.000228411	0	0	0	0	0	0.00119417	0	0	0	0	0	0	0	0	0.000485743	0	0	0.000513958	0	0	0	0	0	0	0	0	0	0	0
A230028O05Rik	0	0	0	0	0.00248823	0	0	0		0.00224101	0.00250258	0.00272618	0	0.000729463	0	0.00249534	0.00196747	0	0.00124634	0	0.00221738	0.00259429	0.00197793	0	0	0.00197601	0	0	0.00346821	0	0.00618408	0	0.00291474	0.00366728	0	0.00387671	0.00609504	0	0.00199973	0	0	0	0.0145898	0.0037632	0
A230050P20Rik	0.0895142	0.135086	0.0806811	0	0.194916	0	0	0.178976		0.147171	0.0993333	0.143327	0	0.135077	0.151096	0.103287	0.109011	0.171901	0.125674	0.135343	0.204533	0.144285	0.135374	0.19166	0.0956355	0.117202	0.129182	0.191482	0.15563	0.176271	0.15135	0.781861	0.245475	0.0904841	0.0946453	0.153317	0.11782	0.130087	0.2398	0.135744	0.104937	0.105936	0.057152	0.0798841	0.359066
A230057D06Rik	0	0	0	0	0.0048301	0	0	0.00209464		0.00167368	0	0.00723726	0	0.0137167	0.053492	0.00191891	0.00160064	0.0233555	0	0.0518895	0.0118723	0.00217909	0.00615624	0	0	0.00739197	0.16826	0	0.00860881	0.00830973	0.00468543	0	0.00940868	0.00464152	0.0065256	0.00446893	0.00661092	0	0.00447784	0	0	0	0	0.00205162	0
A230060F14Rik	0	0	0.00883263	0	0.00165624	0	0	0.00846609		0.00111562	0.000800289	0.00344087	0	0.000710645	0	0.000360141	0.000376608	0	0	0	0.000665766	0	0.000960306	0	0	0.000390859	0	0	0.000487278	0.0105863	0.00555176	0	0.000557745	0.00143082	0.0029332	0.000771716	0	0	0.000446291	0	0	0.00735043	0	0.00114319	0
A230065N10Rik	0	0	0.00705631	0	0.00115879	0	0	0		0.000491477	0	0.00389979	0	0	0	0.000509268	0.000361299	0.00610484	0	0	0.000508805	0	0.000283702	0	0	0.000414	0	0	0.00152675	0	0	0	0.00416223	0.00139669	0	0.00335592	0.000941046	0	0.00507368	0	0	0	0	0.000380765	0
A230072E10Rik	0.0143131	0	0.00812076	0	0.00268078	0	0	0.00516302		0.00411146	0.00158681	0	0	0.00336087	0	0.000525165	0.000442205	0	0	0.00678933	0	0.0016765	0.00104606	0	0	0.000688719	0	0	0.000792664	0	0.00177438	0	0.000986985	0.00250631	0.00247726	0.00103985	0	0	0.000621053	0	0	0	0.00458641	0	0
A230083G16Rik	0	0	0	0	0.000530532	0	0	0.00181304		0.000142357	0	0.00186703	0	0.00118473	0	0.00020688	0	0.00214386	0	0	0.0004936	0.000622841	0.000723266	0	0	0.000808242	0	0	0.00178179	0	0.00186951	0	0.00297131	0	0	0.00101176	0	0	0.00214755	0	0	0	0.0112194	0.00146042	0
A230083N12Rik	0	0	0.00816971	0	0.000869771	0	0	0.00261449		0.000654784	0.00298377	0	0	0	0	0.000787154	0.000994139	0	0	0.000832118	0.00138469	0.000315882	0.00179284	0	0	0.00142005	0	0	0.00137701	0	0.00355438	0	0.00313528	0.00400746	0	0.00205905	0.00196002	0	0.000902166	0	0	0	0	0.00122316	0
A230087F16Rik	0.00415568	0	0	0	0.000283363	0	0	0.00273289		0.00128744	0.00589209	0.00187141	0	0.00132179	0	0.00270452	0.00312796	0.0283101	0.00183045	0	0.00283477	0.00248257	0.00384005	0.0218665	0	0.00203173	0	0	0.00175264	0	0.000938859	0	0.00281003	0.00281186	0.00219165	0.00179947	0.000959533	0.061439	0.0015889	0	0	0	0.013043	0.00201197	0
A230098N10Rik	0.00643197	0	0	0	0.00550562	0	0	0.00319922		0.00233718	0.00374322	0	0	0	0	0	0.000431174	0	0	0	0	0.000778232	0	0	0	0	0	0	0.000283339	0	0	0	0	0	0	0	0	0	0	0	0	0	0	0	0
A230107N01Rik	0.00082282	0	0.00627819	0	0.00100122	0	0	0.00263153		0.00134855	0.000913754	0.00446863	0	0.00117205	0	0.00139943	0.0013494	0.00127003	0.00304681	0	0.00140027	0.00264771	0.00116825	0	0.0121666	0.00217939	0	0	0.00122432	0.0124923	0.00179703	0	0.0027877	0.00299285	0	0.000880145	0	0	0.00154087	0	0	0	0	0.000676416	0
A2m	0	0	0	0	0.00411518	0	0	0		0.00617299	0.00210371	0	0	0	0	0.00337641	0.00164204	0	0.0150687	0.00442659	0	0.00595382	0.00481218	0	0	0.0025511	0	0	0.00121953	0	0.00923536	0	0	0.00139133	0	0	0.000904798	0	0	0.0169987	0	0	0	0.000588601	0
A330009N23Rik	0.0167363	0.0393839	0	0.0489541	0.0107738	0	0	0.00185766		0.0112216	0.0104771	0.09162	0	0.0469076	0	0.0197461	0.0210031	0.0468037	0.0561214	0.0185833	0.0608094	0.0309354	0.0392591	0.143283	0.0431354	0.0330298	0.331347	0.029799	0.0649957	0.159888	0.0669002	0.143825	0.0887127	0.0539307	0.0231387	0.0842326	0.0593455	0	0.0910808	0.0197153	0.0233059	0.0524853	0.0188744	0.035728	0
A330015K06Rik	0	0	0	0	0.00181146	0	0	0		0.000822282	0.00137658	0	0	0.00104368	0	0.00138234	0.00319763	0	0.00230068	0	0	0.00187624	0.000737899	0	0	0.000285241	0	0	0.000456605	0	0.00025836	0	0	0.00124722	0	0	0	0	0	0	0	0	0	0.00129306	0
A330032B11Rik	0	0	0	0	0	0	0	0		0	0	0	0	0.0014364	0	0	0.000331899	0	0	0	0	0	0.000169812	0	0	0.000284127	0	0	0.00038236	0	0	0	0	0	0	0	0	0.0303606	0	0	0	0	0	0.00502891	0
A330035P11Rik	0.00954365	0.0275956	0	0	0.00464335	0	0	0.00591635		0.0054952	0.00194962	0	0	0.00793524	0	0.00270621	0.00253569	0.00901381	0.00114737	0.00750476	0.000591812	0.00230958	0.00370301	0	0.00819158	0.00481747	0	0	0.0056199	0	0.00233186	0	0.00215131	0.00347603	0.00435631	0.00309683	0.00164859	0	0.00436693	0	0	0	0	0.00248151	0
A330041J22Rik	0.00273222	0	0	0	0.00217569	0	0	0		0.000973682	0	0	0	0.00276043	0	0.00318763	0.00293843	0.00720233	0	0.0124572	0.00357234	0.00442592	0.00452849	0	0	0.00515528	0	0	0.00767803	0	0.00436118	0	0.00270184	0.00367368	0	0.00349929	0.00352074	0	0.00359185	0	0	0	0	0.00344738	0
A330043C09Rik	0	0	0	0	0	0	0	0		0	0	0	0	0	0	0	0	0	0	0	0	0	0.000512421	0	0	0.000280835	0	0	0.000810243	0	0	0	0	0	0	0	0	0	0	0	0	0	0	0	0
A330048O09Rik	0	0	0	0	0.00150409	0	0	0		0.00126495	0	0	0	0.00893682	0	0.0010037	0.00243708	0	0	0	0	0.00210471	0.000311674	0	0	0.000279385	0	0	0.000376075	0	0.000663771	0	0	0	0	0	0	0	0	0	0	0	0	0	0
A330069E16Rik	0.0230385	0.0481003	0.028944	0	0.0334523	0	0	0.00572885		0.0268919	0.0129349	0.0150467	0	0.0515095	0	0.0415686	0.0268196	0.0171682	0.0151473	0.00592329	0.0126118	0.0147261	0.0148159	0.0319922	0.0301106	0.0279389	0	0.0179119	0.0234844	0	0.0397287	0.0921752	0.0384254	0.0258	0.00658015	0.0311728	0.0511446	0.0706559	0.0411224	0	0	0.00556654	0.0262324	0.0325433	0
A330069K06Rik	0	0	0	0	0	0	0	0		0	0	0	0	0	0	0	0	0	0	0	0	0	0	0	0	0	0	0	0	0	0	0	0.00215813	0	0	0	0	0	0.00136789	0	0	0	0	0	0
A330074K22Rik	0.00211354	0	0	0.0690217	0.00996188	0	0	0.00611855		0.0123851	0.00865889	0	0	0.0104092	0.0376012	0.00361944	0.00917719	0.00503387	0.0111689	0	0.0120395	0.0116746	0.0114067	0	0	0.00661659	0	0	0.00616195	0.0126002	0.00224613	0	0.00452014	0.00214933	0.00965263	0.00413594	0.00608851	0	0.0033541	0	0	0.022919	0.00416782	0.00381867	0
A330076C08Rik	0	0	0	0	0.00101593	0	0	0		0.00287698	0	0	0	0.00259962	0	0.000222383	0.000408622	0	0.00059649	0	0	0.000610627	0.000181319	0	0	0.000590654	0	0	0.000724974	0	0.00102685	0	0	0.000960442	0	0	0.00136001	0	0	0	0	0	0	0.00115339	0
A330084C13Rik	0.00288916	0	0.0101355	0	0.00398673	0	0	0.00235565		0.00259775	0	0.00254628	0	0	0	0.000922255	0.000971943	0.00159931	0.00358224	0.000824979	0.00191199	0	0.00164844	0	0	0.00162648	0	0	0.00275616	0.00713586	0.00257182	0	0.00532089	0	0.00272311	0.00259883	0.00417235	0	0.00187831	0	0	0	0	0.00769095	0
A330094K24Rik	0	0	0.0285278	0	0.00566776	0	0	0.0125657		0.000429218	0	0.00327026	0	0	0	0.000421601	0	0	0	0	0.00184372	0	0.000714698	0	0	0.00164533	0	0	0.00137568	0	0	0	0.000370018	0.00041908	0	0.000315825	0	0	0.000219785	0	0	0	0	0.000912276	0
A330102I10Rik	0.00192152	0	0.00659812	0	0.00416308	0	0	0.00654119		0.00415898	0.00180797	0	0	0.00424842	0	0.00335633	0.0052954	0.00167376	0.0018582	0.0055407	0.000567526	0.00713619	0.00244259	0	0.0174464	0.00284966	0	0	0.003255	0	0.00391092	0	0.000885143	0.00232484	0.0034752	0.000995035	0.00707811	0	0.00159033	0	0	0.0100664	0	0.0031596	0
A3galt2	0.00288916	0	0	0	0.000227052	0	0	0		0.000448287	0	0.00477231	0	0	0	0.00157038	0.00195339	0	0	0	0.000667334	0.000878959	0.000461693	0	0	0	0	0	0.000438625	0	0	0	0.000601364	0.00133906	0	0.000150123	0	0	0.0008631	0	0	0	0	0.000332473	0
A430005L14Rik	0.352497	0.483964	0.309229	0.539928	0.348314	0.34563	0.703878	0.381399		0.459037	0.294403	0.440863	0.189268	0.333227	0.722816	0.428559	0.329614	0.518012	0.410402	0.398134	0.377035	0.400917	0.341059	0.525229	0.392902	0.517646	0.378611	0.587025	0.45029	0.47442	0.492494	0.25228	0.479437	0.549355	0.460136	0.484188	0.563592	0.421142	0.484207	0.667767	0.57256	0.525733	0.617296	0.627098	0.194382
A430027H14Rik	0	0	0	0	0.00120423	0	0	0.00367664		0.000624189	0	0.0165184	0	0	0	0.000573083	0.0041059	0.0124469	0.00513087	0	0.00877867	0.00038987	0.004559	0.0378212	0	0.00473689	0	0.0155096	0.0262707	0.0394563	0.00514167	0	0.0311263	0.00460376	0.0372098	0.0276607	0.0197074	0.0504257	0.0361429	0	0	0.0181469	0	0.00901434	0
A430033K04Rik	0.0258955	0.0594634	0.0618229	0	0.0252869	0	0	0.0312366		0.0229374	0.00792242	0.0141293	0	0.0294329	0	0.0156063	0.0173328	0.0221769	0.0399818	0.0123028	0.0341097	0.0162788	0.0281956	0	0.0426227	0.0303313	0.0845409	0	0.0385626	0.0447708	0.0349891	0	0.0592721	0.0260755	0.0307275	0.0422963	0.0310714	0.0412671	0.0382443	0	0	0.022451	0.0369116	0.0264905	0
A430046D13Rik	0.0314257	0.0275956	0.0867132	0	0.0222204	0	0	0.0279452		0.0190561	0.0152512	0.0256653	0	0.028731	0.053492	0.010464	0.0121269	0.0414081	0.0138299	0.0479273	0.024009	0.0191265	0.0228662	0.0798087	0.0318223	0.0213695	0	0.00614628	0.0223305	0.0258267	0.0276702	0.122593	0.0213247	0.0184469	0.0256525	0.021207	0.0323423	0	0.0245813	0	0.0315283	0.0156329	0	0.026889	0
A430057M04Rik	0	0.0151676	0	0	0.000908022	0	0	0		0.00199597	0.000762698	0	0	0.0013154	0	0.000570163	0.00109872	0	0.00303286	0	0	0.00333295	0.0015198	0	0	0.000645185	0	0	0.00116713	0	0	0	0	0.000348336	0	0	0	0	0	0	0	0	0	0.00383767	0
A430073D23Rik	0.0030781	0	0.0355683	0	0.0293025	0	0	0.0113447		0.00691295	0	0.0166862	0	0.00663098	0	0.00158562	0.00430435	0.00221682	0.00752304	0.0169164	0.00684949	0.00340041	0.00774331	0	0	0.00809589	0.0632511	0	0.00676493	0.00999763	0.0115545	0	0.00955282	0.0177837	0.0138454	0.00823652	0.0142502	0	0.0066988	0.0230918	0.0294269	0	0.00829939	0.00527	0
A430078I02Rik	0.00439114	0	0	0	0.00147411	0	0	0		0.00226878	0	0.00224844	0	0.00189586	0	0.00204207	0.00235362	0	0	0	0.00196657	0.00145303	0.00242814	0	0.0119902	0.00299857	0	0	0.00145706	0	0.00472643	0	0.00177786	0.000946538	0.00158794	0.00138403	0.000656441	0	0.00386969	0	0	0	0	0.00064564	0
A430105I19Rik	0.0341646	0.0631554	0.054172	0.0489541	0.0689275	0	0	0.0358605		0.0782004	0.0295401	0.0340251	0.105109	0.0612138	0	0.0376249	0.0440924	0.0243551	0.0339617	0.0613955	0.0241547	0.0278225	0.0463854	0.127753	0.0377858	0.0356626	0	0.0219442	0.0191896	0.0667699	0.0179385	0	0.0337075	0.0112815	0.0206228	0.0252396	0.0268301	0.0281122	0.0334517	0.0197973	0	0.0107438	0	0.0116425	0
A430105J06Rik	0.0103915	0.0253212	0	0	0.0101368	0	0	0.00551884		0.0082583	0	0.00769342	0	0.00996731	0	0.00872619	0.00749813	0.00682243	0.00945769	0.00451493	0.010976	0.00767356	0.0135646	0.0298608	0	0.0129462	0	0.00863856	0.0122601	0	0.00818613	0	0.00849995	0.00709218	0.00417202	0.00883532	0.00252169	0.0503988	0.00557853	0.0558641	0	0.0136094	0.015166	0.00997893	0
A430106G13Rik	0.00607726	0	0.0139284	0	0.00823888	0	0	0.017007		0.00862309	0.00425025	0.00407904	0	0.0178096	0.0592831	0.0030748	0.00171597	0.00567842	0.00821838	0	0.00292257	0.00109884	0.00186509	0	0	0.00275571	0	0	0.00500112	0	0.00780581	0	0.0039598	0.00194839	0.00298127	0.00523855	0.00559341	0	0.00488571	0	0.0152835	0	0	0.00311255	0
A430110L20Rik	0	0	0	0	0.00187871	0	0	0		0.00068747	0	0	0	0	0	0.00147532	0.00144029	0	0	0	0.00129392	0.000342588	0.00172758	0	0	0.000824245	0	0	0.00206362	0	0	0	0.00293539	0.00170456	0	0.00287201	0.00243666	0.0106936	0.00246794	0	0	0	0	0.00160922	0
A4galt	0.109087	0.2725	0.10126	0	0.0644984	0.307088	0.703878	0.112421		0.0390373	0.0594798	0.234397	0	0.121278	0.177979	0.060532	0.0686116	0.272273	0.172055	0.102463	0.11081	0.0742431	0.131455	0.162606	0.163341	0.120441	0	0.538884	0.28686	0.272773	0.0895609	0.183465	0.204265	0.231984	0.414921	0.430219	0.256714	0.544837	0.31629	0.0666339	0.120408	0.0565749	0.061459	0.078025	0
A4gnt	0	0	0	0	0.000420693	0	0	0		0.000558407	0	0	0	0	0	0.00179711	0.000540174	0	0	0	0	0.00252748	0.000637472	0	0	0.000206443	0	0	0.000189039	0	0	0	0	0.000227233	0	0	0.000300666	0	0	0	0	0	0.0081083	0.000414185	0
A530001N23Rik	0	0	0	0	0.000923132	0	0	0.0083882		0.00144847	0	0	0	0.00405339	0	0.00206443	0.00233114	0	0	0.00954381	0.00229836	0.00469816	0.00159298	0.0483748	0	0.000842843	0	0	0.000591482	0	0.00135403	0	0.00472289	0	0	0.0020707	0.00104587	0	0.00198597	0	0	0	0.00416782	0	0
A530010F05Rik	0	0	0	0	0	0	0	0		0	0	0	0	0	0	0.000796895	0	0	0.000782555	0	0	0.000692428	0	0	0	0	0	0	0	0	0.000370305	0	0	0.00254273	0	0	0	0	0	0	0	0	0	0	0
A530010L16Rik	0	0	0	0	0	0	0	0		0	0	0	0	0	0	0	0.000172066	0	0	0	0	0	0.000219011	0	0	0.00035365	0	0	0.00068417	0	0	0	0	0	0	0	0	0	0	0	0	0	0	0	0
A530013C23Rik	0.0195178	0.0196919	0.216745	0.144021	0.0260774	0	0	0.0721092		0.0274878	0.0070365	0.0164923	0	0.0140572	0	0.0127495	0.00574474	0.0275221	0.0167843	0.0225573	0.0199146	0.0160076	0.00758137	0	0	0.00792513	0	0	0.0123838	0.0197853	0.0388868	0.0182256	0.0224912	0.00674454	0.0107136	0.0098699	0.0150959	0	0.015295	0	0	0	0	0.00192512	0
A530016L24Rik	0.00341536	0	0	0	0.00607359	0	0	0.00366049		0.00306283	0.00598182	0	0	0.0050198	0.0616101	0.000672231	0.000167023	0	0.00267965	0	0.00218374	0.00428566	0.00281173	0	0	0.000404526	0	0	0.013931	0.023936	0.0294379	0.067943	0.0304555	0.00754868	0.00118385	0.00519343	0.00853406	0	0.0037186	0	0	0	0	0	0
A530017D24Rik	0.0135485	0.0379467	0.0328391	0	0.0107962	0	0	0.0270182		0.0158548	0.0389536	0.0275186	0	0.0322742	0.0324005	0.0111054	0.0196853	0.0721303	0.0194752	0.0226799	0.0178043	0.0147492	0.0219282	0.0310477	0	0.0224119	0	0.00882457	0.0213769	0.0358556	0.021325	0	0.0261726	0.0137803	0.0338612	0.023695	0.0181466	0.256312	0.0315206	0.106853	0.0212168	0.0335808	0.00523738	0.0162972	0
A530020G20Rik	0.00967894	0.0427064	0.0577063	0	0.047574	0.153544	0	0.0161652		0.0188022	0.0111511	0	0	0.0903194	0	0.00331269	0.00513749	0	0.0309077	0.0824012	0.0112569	0.0059647	0.0188723	0.020186	0.0129206	0.0134982	0	0.0358012	0.0167521	0.0267002	0.0260744	0	0.016477	0.00380454	0.00287764	0.002373	0.0018	0	0.0042052	0.0209223	0	0.028636	0.0479323	0.0151957	0
A530021J07Rik	0	0	0	0	0	0	0	0		0.00353821	0	0	0	0	0	0.000586182	0	0	0	0	0	0	0	0	0	0	0	0	0	0	0	0	0	0	0	0	0	0	0	0	0	0	0	0	0
A530032D15Rik	0.00147822	0	0	0	0.00363474	0	0	0		0.00184694	0	0	0	0.00653332	0	0.000797672	0.00130438	0	0.00329922	0	0.00443448	0.00162422	0.00277123	0	0	0.000989882	0	0	0.00227379	0	0.000665387	0	0.00111307	0.000311244	0.0047206	0.00105052	0.00400694	0	0.00072483	0	0	0	0	0.000481617	0
A530040E14Rik	0	0	0	0	0.00415235	0	0	0.00339881		0.00265128	0	0.00446863	0	0.004614	0	0.00429047	0.00218859	0.00164859	0.00157772	0.00169612	0.00281669	0.00257902	0.0018427	0	0	0.00153996	0	0	0.00171816	0	0	0	0.00113304	0.000885119	0	0.00132589	0.00418754	0	0.000720211	0	0	0	0	0.000395838	0
A530046M15Rik	0.00457901	0	0	0	0.000219159	0	0	0		0.00159811	0.000792131	0	0	0	0	0.0023574	0.00171963	0	0	0	0	0.00186191	0.00126405	0	0	0.000718899	0	0	0.000672418	0	0.00177789	0	0	0.000459305	0	0	0.00242256	0	0	0	0.0137264	0	0	0	0
A530053M12Rik	0	0	0	0	0.000384039	0	0	0		0.00106976	0.00221686	0	0	0.000380344	0	0.000742009	0.00126717	0	0.00130466	0	0	0.00126986	0.00171052	0	0	0.00248749	0	0	0.00148267	0	0	0	0	0.00171348	0	0	0.00238311	0	0	0	0.0157754	0	0.00522736	0.00495166	0
A530064D06Rik	0	0	0	0	0.000441649	0	0	0		0	0	0	0	0	0	0	0	0	0	0	0	0	0.000324208	0	0	0.000271094	0	0	0	0	0	0	0	0	0	0	0	0	0	0	0	0	0	0.000329213	0
A530065N20Rik	0	0	0	0	0.000440819	0	0	0		0	0.00125352	0.00195308	0	0.00224658	0	0.000925224	0.00117787	0	0	0	0	0.000756145	0.000731257	0	0	0.000464828	0	0	0.00199269	0	0.00151822	0	0.000472284	0.0011601	0	0.0010478	0.00182258	0	0.00179888	0	0	0	0	0.000464691	0
A530076I17Rik	0	0	0	0	0.000449627	0	0	0		0	0.00151798	0	0	0.00408856	0	0	0.000307562	0	0	0	0	0	0.000379469	0	0	0.000531179	0	0	0.0028536	0	0	0	0.0011731	0	0.00166541	0.000918117	0	0	0.000733762	0	0	0	0	0.000496498	0
A530095I07Rik	0.00697147	0.045549	0.0103096	0.0489541	0.0288286	0	0	0.00188435		0.0278915	0.015063	0	0.0644695	0.0227056	0	0.0291645	0.0272723	0.00284844	0.0418004	0.0244663	0.0241996	0.0532399	0.0400821	0.0230409	0.0350555	0.0406225	0	0.0155096	0.0111974	0.00949931	0.0113002	0	0.00641343	0.0163247	0.00806284	0.00466738	0.00792876	0	0.00494899	0	0.0095584	0.0113379	0.00666406	0.0113824	0
A630001G21Rik	0.00826085	0	0	0	0.0127671	0	0	0.0083277		0.0152957	0.00709223	0.0278322	0	0.013473	0.053492	0.014308	0.0162414	0.0416248	0.0173204	0.0175388	0.016215	0.0141207	0.0173942	0	0	0.020561	0	0	0.0172067	0.0322545	0.0126542	0	0.0112463	0.00842275	0.0131122	0.00842387	0.00626383	0	0.00882903	0	0.0161044	0	0.025389	0.0238089	0
A630009H07Rik	0.0034264	0	0	0	0.00107916	0	0	0.0017785		0.00312822	0	0	0	0.00129999	0	0.00106541	0.000333626	0	0	0	0	0.00183016	0.000697197	0	0	0.00086093	0	0	0.000570705	0	0.0048262	0	0.00164324	0.00090187	0	0.000640131	0	0	0.00125051	0	0	0	0	0.000644394	0
A630023A22Rik	0.0225723	0	0	0.131461	0.0326013	0	0	0.0433866		0.0282342	0.0228105	0	0	0.00460398	0	0.0111563	0.0193643	0	0.00997166	0.0234307	0	0.0123222	0.0145055	0	0.0194582	0.00790472	0	0	0.00157392	0	0.00508553	0	0	0.00190059	0	0	0.000375916	0	0	0	0.021907	0	0	0.00531559	0
A630023P12Rik	0	0	0	0	0	0	0	0		0.00181416	0	0	0	0	0	0.000120066	0	0	0	0	0	0.000360454	0	0	0	0	0	0	0	0	0.00212707	0	0	0	0	0	0	0	0	0	0	0	0	0	0
A630072M18Rik	0.0528658	0.082398	0.0178436	0.0624395	0.0512723	0	1.40776	0.0352053		0.034194	0.0356606	0.0885357	0	0.0749534	0.0555775	0.0343783	0.0620071	0.0667519	0.0768793	0.0887831	0.100468	0.0387047	0.0758054	0.132626	0.0430397	0.0858471	0	0	0.104164	0.129487	0.0964221	0.020005	0.110122	0.0839027	0.109901	0.0900143	0.0765173	0.126802	0.117265	0.0693742	0.142547	0.12677	0.0562245	0.0886252	0
A630089N07Rik	0.0485791	0.0427632	0	0	0.0297397	0	0	0.0419355		0.0265774	0.0209444	0.00845943	0	0.0124281	0.0650775	0.0217406	0.0215174	0.0299	0.00850966	0.0211139	0.0203574	0.0133109	0.0160385	0.0716826	0.00551578	0.0226822	0	0.0216559	0.0210547	0	0.0404829	0.0874656	0.0299159	0.0196145	0.0224536	0.0240277	0.0255608	0	0.0198103	0	0	0	0.0119052	0.0299492	0
A730011C13Rik	0	0	0	0	0.00162555	0	0	0.00307294		0.00118816	0	0	0	0.000888447	0	0.00352612	0.00222192	0.00260423	0.00152556	0.0110885	0.000452635	0.000692366	0.000622385	0	0	0.0016002	0	0	0.0024371	0	0	0	0.00102371	0.000794269	0.00222047	0.00215883	0.00415456	0	0.0030721	0	0	0	0	0.00244188	0
A730015C16Rik	0.000723941	0	0	0	0.000307299	0	0	0		0.00113186	0.00140432	0	0	0.0016778	0	0.00122249	0.00644838	0	0	0.0206486	0.00218725	0.00374914	0.00213719	0	0.00551578	0.0061914	0	0	0.00233618	0.0103668	0	0	0.00447081	0.00141158	0.00309114	0.00156253	0.00248474	0	0.00288653	0	0	0	0	0.00488138	0
A730017C20Rik	0.00541247	0.0239798	0.00901261	0	0.0244836	0	0	0.00875045		0.0252126	0.00364727	0.00488555	0	0.00650821	0	0.00608374	0.00308548	0	0.00148962	0	0.000996767	0.00170072	0.000475446	0	0	0.000554887	0	0	0.00433979	0.0129581	0.0168358	0	0.00203992	0.00420148	0.00138182	0.00288586	0.00392717	0	0.00116808	0	0	0	0	0	0
A730020M07Rik	0	0	0	0	0.00263614	0	0	0.00476169		0.00159548	0	0	0	0.0313521	0	0.00261747	0.00091851	0.0415526	0.00166558	0	0.00347643	0.0003818	0.00131616	0	0	0.00195249	0	0	0.00457217	0.0117978	0.00842466	0.0446134	0.0123014	0.00463473	0	0.0105308	0.0212751	0	0.00975813	0	0	0	0	0.00316948	0
A730032A03Rik	0	0	0	0	0	0	0	0		0	0	0	0	0	0	0	0	0	0	0	0	0	0.00067138	0	0	0.000518373	0	0	0.000121511	0	0	0	0	0	0	0	0	0	0	0	0	0	0	0.000565558	0
A730035I17Rik	0	0	0	0	0	0	0	0		0.000220198	0	0.00469458	0	0.000879622	0	0.000512425	0.000779915	0.0050687	0	0	0	0	0.000315469	0	0	0.000125158	0	0	0.0010998	0	0.000503347	0	0.00043748	0.00157551	0.00737964	0.00318373	0.00463298	0	0.00116126	0	0	0.012299	0.0193231	0.000877957	0
A730046J19Rik	0.26234	0.147977	0.7171	0.144021	0.102305	0	0	0.312966		0.0258566	0.0143648	0.0358476	0	0	0	0.000711872	0.000749766	0	0	0	0.000859165	0.000713075	0.000274016	0	0	0.000131816	0	0	0.000771975	0	0.000142925	0	0.000739717	0.000652984	0.00165845	0	0	0	0.000307962	0	0	0	0	0.00057613	0
A730049H05Rik	0.00307154	0.0188421	0	0	0.0140504	0	0	0		0.0241063	0.102285	0.00497463	0	0.000621539	0	0.00922656	0.007309	0	0	0.00756475	0.00165823	0.00639866	0.00113672	0	0	0.000993863	0	0	0.000762657	0	0.000592448	0	0.00161106	0.00135528	0	0.000763172	0.00041542	0	0.00106107	0	0	0	0.00917282	0.00115899	0
A730056A06Rik	0.00715133	0.0239798	0.0148651	0	0.0163655	0	0	0.00675049		0.00434504	0.00165936	0.0186898	0.149263	0.0208553	0	0.00819771	0.00942205	0.0437831	0.0292288	0.00510693	0.0208209	0.00730041	0.0228974	0.0630683	0	0.0247542	0.0845409	0.0172449	0.0565355	0.0263295	0.0142992	0	0.0313159	0.0267016	0.0689379	0.0636921	0.0438275	0.0679945	0.0766028	0.0435529	0.0342524	0.0427876	0	0.0314198	0
A730061H03Rik	0	0	0	0	0.000475547	0	0	0		0	0	0	0	0	0	0	0	0	0	0.0024754	0	0	0.000376989	0	0	0.000175632	0	0	0.00112477	0	0	0	0	0	0	0	0	0	0	0	0	0	0	0	0
A730063M14Rik	0.0601238	0.0239798	0.036849	0	0.0685329	0.314347	0	0.0535965		0.0453119	0.0547977	0.0452537	0	0.0726531	0.0616101	0.0282093	0.0590975	0.0378894	0.0470148	0.0567693	0.0609866	0.0320689	0.0650936	0.0256326	0.0354217	0.0784835	0	0.0633152	0.0535118	0.114028	0.0328295	0.173054	0.0467465	0.0528377	0.0383427	0.0408552	0.0472573	0.0302347	0.0434408	0	0.084522	0.0191998	0.013442	0.0629739	0
A730071L15Rik	0	0	0.00694607	0	0.00303165	0	0	0.0057811		0.00131986	0	0.00238152	0	0.000574559	0	0.00102943	0.000373368	0	0	0.0106579	0.000436041	0.000769253	0.000451394	0	0	0.00100994	0	0	0.000599171	0	0	0	0.00185467	0	0	0.00135799	0.000953466	0	0.00291412	0	0.0411388	0.0104596	0	0.00132579	0
A730081D07Rik	0	0	0	0	0.000726101	0	0	0		0.000554199	0.00245318	0	0	0.00139722	0	0.000256368	0.000581038	0	0.00162812	0.00162148	0.00263287	0.00203182	0.00152635	0	0	0.00295181	0	0	0.00318361	0	0.00161558	0	0.00514491	0.00176239	0	0.00324865	0.00259172	0	0.00416858	0	0	0	0	0.00151248	0
A730090N16Rik	0	0	0	0	0.0018064	0	0	0		0.00160408	0	0	0	0.0013962	0	0.00148362	0.00172445	0	0.00117249	0	0	0.00121186	0.00199548	0	0	0.000533417	0	0	0.000843658	0	0	0	0	0.00062638	0	0	0.00245077	0	0	0	0	0	0	0.00310004	0
A830005F24Rik	0	0	0	0	0.0119478	0	0	0		0.00433306	0.00183236	0.00397105	0	0.000798959	0	0.00758625	0.00369918	0.00207439	0.000861995	0.000739876	0.00130494	0.00550432	0.00136215	0	0	0.00169956	0	0	0.00118766	0	0.000912696	0	0.000216833	0.00354009	0	0.00160923	0.00504467	0	0.00106093	0	0	0	0	0.00204461	0
A830008E24Rik	0	0	0.0136551	0	0	0	0	0		0	0.0206611	0	0	0	0	0	0.000403541	0	0	0	0.000638343	0	0.000290713	0	0	0.000146294	0	0	0.00127749	0	0	0	0.00627651	0	0	0.00111686	0	0	0.00240685	0	0	0	0	0.000481617	0
A830009L08Rik	0.00148351	0	0	0	0.00174754	0	0	0.010562		0.00113162	0.00291894	0.00554226	0	0.00127598	0	0.00154408	0.00118299	0.00467468	0.00132362	0	0.00608694	0.00153058	0.00459988	0	0	0.00572098	0	0	0.00317081	0	0.00216283	0	0.00401608	0.0020353	0.00407333	0.00271562	0.000544524	0	0.00393513	0	0	0	0	0.00625713	0
A830010M20Rik	0.0347615	0.10788	0.0793476	0	0.0414395	0.192086	0	0.0445842		0.0380863	0.0223869	0.0888296	0	0.0199475	0	0.0168957	0.0204593	0.048655	0.0149225	0.0188719	0.0235221	0.0164862	0.0220034	0	0.0396183	0.022452	0	0.0153379	0.0312573	0.025225	0.0281164	0	0.0350887	0.0200197	0.02668	0.032492	0.0140276	0	0.0285811	0.101735	0.0369921	0.0804449	0.020599	0.0440473	0
A830011K09Rik	0	0	0	0	0.00343139	0	0	0		0.00175571	0.00182081	0	0	0.000961535	0	0.000528532	0.000236158	0	0	0	0.00116837	0.000723082	0.000114262	0	0	7.82019e-05	0	0	0.00184941	0	0.000558047	0	0.00246701	0.000934715	0	0.000961392	0	0	0.000214006	0	0	0	0	0	0
A830018L16Rik	0	0	0	0	0.000826012	0	0	0		0	0.00280865	0.00853226	0	0.000736421	0	0	0.000207182	0.00397944	0	0	0	0	0.000701519	0	0	0.00167779	0	0	0.0010389	0.0139405	0	0	0.00144166	0	0.00266908	0.000660203	0	0	0.00236175	0	0	0	0	0.00438614	0
A830019P07Rik	0	0	0	0	0	0	0	0.00407825		0.00157387	0	0.0209668	0	0.00202375	0	0.00353133	0.000341072	0.00894368	0.00436681	0	0.00323179	0.000989607	0.00175109	0	0	0.00171273	0	0	0.00487357	0.0139405	0.00574956	0.0207715	0.00539527	0.00154365	0	0.00567884	0.00757872	0	0.0160803	0.0264845	0	0.0114274	0	0.00390353	0
A830035O19Rik	0.00715782	0	0.0179274	0	0.00551141	0	0	0.0125898		0.00534575	0.0189586	0.00168929	0	0.0119607	0	0.00525774	0.00456018	0.00252768	0.00331872	0.0130624	0.00441072	0.00400401	0.00817244	0	0	0.00710052	0	0.00805594	0.00990614	0	0.00714392	0	0.0140005	0.0128007	0.00900686	0.00990755	0	0	0.00909796	0	0	0	0.00522736	0.00143854	0
A830052D11Rik	0.0132144	0	0.0255997	0.0527869	0.0140127	0	0	0.00938223		0.0112344	0.00742712	0	0	0.00711235	0	0.00464993	0.00377318	0.010747	0.00329693	0	0.00578432	0.00727658	0.00337789	0.0639844	0	0.00404384	0	0	0.00550273	0.0142871	0.00722657	0	0.00380333	0.00405973	0.00456409	0.00760895	0.00949465	0	0.0047414	0	0	0	0	0	0
A830082K12Rik	0.0314898	0.0239798	0.0344256	0	0.0478688	0	0	0.0197414		0.0358159	0.0271192	0.0369569	0.306927	0.110425	0	0.0536429	0.0513818	0.123201	0.0422765	0.078435	0.0557718	0.0545471	0.0422952	0.0631473	0.0270816	0.0516208	0.314383	0.0997281	0.0584065	0.0174497	0.0557239	0.0389971	0.0666318	0.0728088	0.0580735	0.0627533	0.0602785	0.0307195	0.0580732	0.0244388	0.0389942	0.0889579	0.0315907	0.0344391	0
A930002C04Rik	0	0	0.00685038	0	0.00627255	0	0	0.00342245		0.000841765	0.0013987	0	0	0.00261241	0	0.000350872	0	0	0.00094142	0	0	0	0.000348709	0	0	0.00084856	0	0	0.00066631	0	0.000784564	0	0.00166599	0.00073895	0	0	0	0	0	0	0	0	0	0	0
A930002H24Rik	0	0	0	0	0	0	0	0		0	0	0	0	0	0	0	0	0	0	0	0	0	0	0	0	0	0	0	0	0	0	0	0.000239275	0	0	0.000770251	0	0	0.00204359	0	0	0	0	0	0
A930003A15Rik	0	0	0.00374832	0	0.00125976	0	0	0		0.00324533	0.00108676	0	0	0.00201426	0	0.00610003	0.00754977	0	0.00197936	0.00243599	0.00155368	0.0031372	0.0016755	0	0.0615139	0.00397269	0	0	0.00417327	0	0	0	0	0.000953512	0.0075757	0.00178797	0.0105312	0	0.000822638	0.077113	0	0.049792	0.0779939	0.0562673	0
A930004D18Rik	0.0760891	0.0216064	0.185832	0.151011	0.0435924	0	0.703878	0.0675521		0.0417187	0.0430721	0.0350445	0.0525547	0.0312507	0.0685453	0.0384358	0.0726593	0.0241987	0.0827399	0.100796	0.0782824	0.0623764	0.0815008	0.0188473	0.0609413	0.0972936	0.0865179	0.207877	0.057399	0.0579366	0.0465017	0	0.0409673	0.0546937	0.0595956	0.0464658	0.0456968	0.0277143	0.0556324	0	0	0.0606898	0.0646446	0.107701	0
A930006I01Rik	0	0	0	0	0	0	0	0		0.00119318	0	0	0	0	0	0.000627703	0	0	0	0	0	0	0	0	0	0	0	0	0	0	0	0	0	0.0008001	0	0	0	0	0	0	0	0	0	0	0
A930007I19Rik	0.00259988	0	0.0409752	0	0.00802389	0.153544	0	0.00505154		0.00373872	0.000977572	0.00493717	0	0.0063561	0	0.00460685	0.00569503	0.00525045	0.00372051	0	0.00190826	0.00424457	0.00409232	0	0.00996348	0.00379167	0	0.125755	0.00376298	0	0.00439475	0	0.00382123	0.00212082	0.00342204	0.00305657	0.00154641	0	0.00565657	0	0	0	0.00629843	0.00369928	0
A930012L18Rik	0.00265765	0.0196919	0.00217805	0	0.00550195	0	0	0.0102416		0.00405835	0.00141779	0.0101873	0	0.0048904	0	0.0036526	0.00271738	0.0012988	0.00257035	0	0.00226439	0.00453587	0.00358966	0	0	0.00421314	0	0	0.00495827	0.012399	0.0054483	0	0.00295189	0.00973499	0.0101565	0.00396461	0.00267879	0	0.00185713	0	0	0.0148407	0.0081083	0.000817069	0
A930015D03Rik	0.0160821	0.0215692	0.0211578	0	0.0227954	0	0	0.0237522		0.00835314	0.00424902	0.00461424	0	0.0069062	0	0.00696621	0.00619939	0.0168693	0.00577362	0.00461724	0.00844048	0.00814993	0.00872349	0	0.0124632	0.008106	0	0	0.00846831	0.00943668	0.00255523	0	0.0125691	0.00662221	0.00695064	0.0101305	0.00589942	0	0.00905118	0.0230918	0	0.0185697	0	0.0182955	0
A930018P22Rik	0	0.0275956	0	0	0	0	0	0		0.00190398	0	0.00614424	0	0.00277809	0	0.00211391	0.00234798	0	0	0.00862879	0	0.000728128	0.00247326	0	0	0.00239371	0	0	0.00183768	0	0	0	0.0026038	0.00363316	0.00522682	0.00253616	0	0	0.00028061	0	0	0	0	0.00440345	0
A930024E05Rik	0.00158399	0	0.00620312	0	0.00303888	0	0	0.00171124		0.00250192	0.0334401	0	0	0.00680694	0	0.00156107	0.00205066	0	0.0035601	0.00200813	0.00505243	0.0015812	0.00384955	0	0	0.00307975	0	0	0.00494552	0	0.00462857	0	0.00298998	0.00285608	0	0.00434818	0.00313765	0	0.0030622	0	0	0	0	0.00332692	0
A930024N18Rik	0.00256187	0	0	0	0.000576861	0	0	0.0029308		0.0013186	0	0	0	0	0	0.000331876	0.000324426	0	0.00166011	0	0	0.000415614	0.00077323	0	0	0.000243923	0	0	0.000290963	0	0.000983901	0	0	0	0	0	0	0	0	0.028983	0	0	0	0	0
A930028N01Rik	0.00474355	0	0.00685038	0	0.00116682	0	0	0		0.000366813	0	0.00332943	0	0.00051466	0	0.000186714	0.00244577	0.00215372	0	0	0.00367467	0.000683973	0.00122148	0	0	0.0007685	0	0	0.00185966	0	0	0	0.00233699	0	0.000742875	0.00184972	0.00346386	0	0.00224517	0	0	0	0	0	0
A930029G22Rik	0.00808578	0	0.0328136	0	0.0125928	0	0	0.00802752		0.0227815	0.0123057	0.0203929	0.0644695	0.013204	0	0.0210279	0.0333922	0.0261323	0.0196883	0.00882651	0.0205381	0.0246421	0.0182224	0.0256326	0.0330187	0.030109	0	0.00614628	0.0175563	0.0225913	0.0104842	0.0424375	0.0176467	0.0131426	0.00509328	0.0169513	0.0218424	0	0.0295404	0	0.0250344	0.051652	0.0164924	0.0265806	0
A930033H14Rik	0.00544692	0	0.0508841	0	0.0114863	0	0	0.0186747		0.00301607	0.00124758	0.0281349	0	0.0087707	0	0.00430625	0.0122035	0.0123588	0.0361337	0.0174093	0.0501436	0.00567234	0.0245718	0.0671584	0.0234946	0.0281209	0	0	0.0262202	0.0506605	0.0273879	0.0943849	0.0493889	0.0177825	0.013723	0.0247964	0.0193061	0.155717	0.0245264	0	0	0.0134314	0	0.0168507	0
A930038B10Rik	0	0	0	0	0.000582629	0	0	0.00287515		0.000271754	0	0	0	0.000891479	0	0.000521854	0.000359853	0	0	0	0	0.00102162	0.000141872	0	0	0.000175048	0	0	0.000192895	0	0	0	0	0.000384118	0	0	0.00167861	0	0	0	0	0	0	0.000479064	0
A930041C12Rik	0	0	0	0	0.000673812	0	0	0		0	0	0	0	0.00383137	0	0	0.000178425	0	0	0	0	0	0.000279922	0	0	0.000183012	0	0	0.000145978	0	0	0	0	0	0	0	0	0	0	0	0	0	0	0.00121394	0
AA467197	0.0160684	0.0195422	0	0	0.0166801	0	0	0.0145372		0.0596086	0.21555	0.231452	0	0.186626	0.205636	0.288976	0.138084	0.132113	0.0203311	0.0141151	0.0249084	0.0206919	0.00949152	0	0.0357171	0.00391553	0	0	0.012419	0.00999763	0.0223887	0.0224325	0.00249039	0.0587615	0.0539918	0.0216155	0.0169471	0.0517165	0.00459276	0	0	0.119649	0.0379168	0.00583751	0
AA543186	0.00463144	0.0354836	0	0.0690217	0.00213212	0	0	0.00476408		0.00267099	0.00157369	0.00254628	0	0.00342945	0	0.00152194	0.00157117	0.00269189	0.00806373	0	0.00813004	0.00253321	0.00379957	0	0	0.00496419	0	0	0.00541539	0	0.0012575	0	0.00210479	0.000810513	0	0.00381107	0.00348558	0	0.00395996	0	0	0.0121859	0.00829939	0.00256035	0
AA986860	0.0134087	0	0.00217805	0.0690217	0.00735723	0	0	0.0125892		0.0101807	0.00501256	0.00547717	0	0.00432366	0.0831324	0.00682263	0.00511934	0.012895	0.0059968	0.0340179	0.00961197	0.0072523	0.00812971	0.0427846	0.0111475	0.00724081	0	0	0.00944628	0.0124923	0.00503104	0	0.0125074	0.00684251	0.00747438	0.00981	0.00348689	0	0.00961867	0.039988	0	0.00792624	0	0.00929897	0
Aaas	0.156522	0.100702	0.12215	0.278769	0.0936524	0.192086	0	0.106581		0.17563	0.197883	0.223268	0	0.076991	0.0754569	0.222589	0.207582	0.164418	0.140082	0.0794997	0.0749976	0.147827	0.0796619	0.162526	0.13267	0.0907737	0.0845409	0.117361	0.0843602	0.0499098	0.0835987	0.119133	0.0820334	0.110387	0.0816878	0.0829108	0.128354	0.105096	0.0911982	0.501343	0.333178	0.422318	0.52402	0.344402	0
Aacs	0.211906	0.15436	0.143964	0.144021	0.127702	0	0	0.155313		0.177796	0.100583	0.126263	0.105027	0.0811185	0	0.207354	0.152299	0.115994	0.0877422	0.127648	0.0657361	0.15931	0.0784811	0.0546878	0.0541812	0.0806384	0.0998363	0.059103	0.0933986	0.0695266	0.0562437	0.0593867	0.0879209	0.131161	0.125187	0.14406	0.11406	0.0106936	0.090851	0.12739	0.0469205	0.0941028	0.0953639	0.0953494	0.226783
Aaed1	0.293174	0.177739	0.720507	0.495067	0.418169	0.81352	0.703878	0.507545		0.266714	0.231375	0.6016	0.59282	0.401453	0.584685	0.248613	0.285483	0.722883	0.539765	0.336523	0.546051	0.329994	0.425518	0.788207	0.332526	0.447576	0.438481	0.628645	0.640155	0.846905	0.689753	0.388531	0.915845	0.476789	0.458289	0.729129	0.6043	0.260912	0.828534	0.615204	0.463805	0.635296	0.342299	0.411713	0.388765
Aagab	0.0999757	0.0416213	0.0782386	0.0624395	0.0781039	0.192086	0	0.124297		0.0702215	0.0672113	0.0902128	0.213732	0.0750676	0.030612	0.0639304	0.0798547	0.0802917	0.067198	0.0995869	0.0722871	0.0724432	0.0642893	0.171458	0.0621449	0.0656797	0	0.273809	0.0835828	0.0842234	0.075977	0.020005	0.0964417	0.0709706	0.0743412	0.110893	0.0668105	0.0559553	0.114581	0.0593136	0.166641	0.0710438	0.0255992	0.0693747	0.226783
Aak1	0.179641	0.253266	0.380171	0.229815	0.188203	0.153544	0	0.179042		0.185378	0.146775	0.141144	0.222051	0.257393	0.400625	0.220904	0.274124	0.202941	0.152365	0.337005	0.220839	0.157249	0.236258	0.0582173	0.15501	0.218392	0.341295	0.0886255	0.167128	0.0654874	0.131127	0.236739	0.15512	0.166731	0.209938	0.154946	0.125244	0.270723	0.181045	0.246057	0.320407	0.245252	0.152183	0.209553	0.698034
Aamdc	0.436566	0.46045	0.637418	0.481322	0.543787	0.883346	0	0.477268		0.482261	0.284862	0.739083	0.403	0.677245	0.349894	0.435263	0.417713	0.827874	0.712235	0.507006	0.772292	0.501324	0.712168	0.897075	0.607502	0.910076	0.928689	0.934564	0.809247	0.820154	0.846453	0.534541	0.742784	0.951782	0.890646	0.860607	0.808212	0.748673	0.857359	0.529326	0.472345	0.490952	0.401906	0.53149	0.842331
Aamp	1.78091	1.68771	1.47934	1.42122	1.56709	1.23561	1.40776	1.75707		1.71836	1.16769	1.29079	2.16717	1.23971	1.25014	1.41072	1.30781	1.32478	1.52671	1.56729	1.23105	1.45753	1.18061	1.62864	1.38055	1.41557	0.711624	1.36114	1.43787	1.51559	1.36091	1.02403	1.42721	1.39504	1.23854	1.37251	1.40718	1.0332	1.40985	1.18009	0.89614	0.917102	1.23631	1.20976	0.221361
Aar2	0.140003	0.129302	0.169188	0.277932	0.102955	0.314347	0	0.117614		0.119562	0.103483	0.168281	0.136713	0.121632	0.225213	0.105884	0.134614	0.0813348	0.134231	0.0939193	0.10006	0.114458	0.0948548	0.0799697	0.100886	0.103873	0.247134	0.114087	0.128942	0.189379	0.113729	0.0634997	0.142327	0.115267	0.0803225	0.157892	0.138161	0.14594	0.147627	0.149425	0.181822	0.190231	0.0866267	0.0993841	0.194382
Aard	0.040995	0	0.121897	0.111394	0.0316286	0	0	0.0374768		0.0303412	0.0436014	0.0612931	0	0.0193053	0	0.0375241	0.0521967	0.024038	0.0472723	0.0485588	0.0707147	0.0229113	0.0440889	0.102284	0.0403362	0.0682474	0	0.0628141	0.104072	0.0503886	0.231603	0.0182256	0.126456	0.0854015	0.038472	0.0255347	0.0739341	0.0995107	0.0334926	0.899308	0.181366	0.596791	0.419485	0.305454	0.674928
Aars	0.306908	0.25552	0.157477	0.0606767	0.224952	0.153544	0	0.24522		0.31271	0.366542	0.457165	0.266287	0.267998	0.518666	0.481054	0.528604	0.538298	0.354928	0.618129	0.2604	0.450303	0.289031	0.321103	0.314236	0.323123	0.451211	0.242299	0.323475	0.357544	0.189169	0.0839011	0.307505	0.294756	0.328318	0.361451	0.361628	0.260816	0.361845	0.816105	0.523996	0.417694	0.453154	0.425514	1.0868
Aars2	0.03351	0.0435219	0.0328044	0.0624395	0.0328239	0	0	0.0333949		0.0315514	0.0342266	0.057858	0	0.0366503	0.0650775	0.0389836	0.0611141	0.0525803	0.0465744	0.100891	0.0582325	0.0389131	0.0414888	0.130613	0.0231131	0.0409003	0.0659309	0.0199417	0.0514425	0.141609	0.0377585	0.01469	0.0639821	0.0427835	0.0402814	0.0796323	0.0626944	0.0159207	0.0827458	0.0784222	0.0825385	0.0457654	0.0604675	0.0414878	0
Aarsd1	0.0316086	0.0213532	0	0	0.0119682	0	0	0.00926349		0.0115395	0.00622769	0.0245587	0	0.011702	0	0.0146568	0.0247716	0.0395694	0.0223864	0.00509424	0.0325954	0.0136716	0.0200026	0.0315736	0	0.0209186	0	0.00882457	0.0274921	0.0424816	0.0132244	0	0.0366479	0.0224137	0.0256265	0.0362672	0.0147301	0.0281122	0.0465387	0.0265066	0.0953103	0.0339293	0.0321447	0.0399555	0.503651
Aasdh	0.0392679	0.0216064	0.0495521	0	0.032039	0	0	0.0242034		0.023603	0.0203757	0.0532852	0	0.0307608	0	0.0227267	0.0420314	0.0177496	0.0221367	0.0682202	0.0297098	0.0209299	0.033812	0.0271084	0.0286276	0.0356733	0	0.0549035	0.0327959	0	0.0242138	0.0195937	0.0443932	0.0273198	0.018478	0.0376629	0.0225623	0.0456499	0.0392543	0.0343494	0.0137264	0.0253352	0.0256838	0.0251608	0
Aasdhppt	0.453476	0.266863	0.171128	0.278769	0.338516	0.192086	0	0.339737		0.484113	0.345745	0.377471	0.668929	0.321795	0.147936	0.489054	0.421698	0.374263	0.408646	0.212222	0.303195	0.456872	0.306801	0.316485	0.549488	0.445151	0.315947	0.563777	0.336833	0.276286	0.381029	0.195561	0.280701	0.366199	0.32762	0.292898	0.404686	0.248334	0.274461	0.33922	0.447645	0.29079	0.485947	0.449319	0.226783
Aass	0.0355041	0	0.0211496	0.121809	0.0612633	0	0	0.016652		0.0583623	0.0331406	0.0210841	0	0.0779736	0.0650775	0.0180548	0.0139216	0.0147619	0.0134817	0.0132783	0.0140116	0.0171321	0.0149114	0.0281913	0.0252286	0.0199343	0	0.049265	0.0354869	0.0489714	0.0380798	0	0.0625127	0.0329209	0.00669809	0.0337388	0.0553526	0.140473	0.0493541	0.0247094	0	0.0475086	0.0230497	0.0140561	0
Aatf	0.256555	0.138982	0.233002	0.190375	0.197997	0.192086	0	0.176391		0.270963	0.160749	0.263502	0.222134	0.162719	0.0324005	0.247636	0.21408	0.226832	0.208778	0.183436	0.184728	0.223981	0.160199	0.169528	0.152131	0.19138	0.281806	0.307489	0.224401	0.213642	0.243239	0.308913	0.257076	0.201812	0.209196	0.25265	0.281337	0.510935	0.243355	0.34926	0.14418	0.25942	0.205395	0.222037	0.221361
Aatk	0	0	0	0	0	0	0	0		0	0.00140495	0.115457	0	0.00207354	0	0.000768567	0.000768623	0.0289023	0	0.0136048	0.0034789	0.000613563	0.00201083	0.0537736	0	0.000905621	0	0	0.00798466	0.0105863	0.0133932	0	0.0251692	0.0175543	0.00331517	0.0203399	0.00431192	0	0.0160642	0	0	0	0	0.00499917	0
AB124611	0	0	0	0	0.000646734	0	0	0		0.00550346	0	0	0	0.00158291	0	0.000298706	0.000197391	0	0	0	0	0.000563639	0.0010189	0	0	0.000930323	0	0	0.001546	0	0.00128329	0	0.00052968	0	0.00252474	0.000319968	0	0	0.000867642	0	0.0095584	0	0	0.00113603	0
Abat	0.0323872	0.0275956	0.172441	0.117976	0.11929	0	0	0.0585187		0.0560963	0.035788	0.0637829	0	0.13019	0	0.026919	0.0233165	0.032315	0.051121	0.02108	0.0774942	0.0277568	0.0483642	0.0180553	0.0205765	0.0592093	0.0632511	0	0.0594253	0.0616055	0.0754344	0	0.0819289	0.0386929	0.0421862	0.0483428	0.0389334	0.0542979	0.0625808	0.151482	0	0.038404	0.015166	0.031068	0
Abca1	0.0915867	0.147874	0.222053	0.0690217	0.192266	0.659977	0	0.156117		0.144978	0.155716	0.243346	0	0.278433	0.0916837	0.0610598	0.0686866	0.206317	0.141989	0.285596	0.205273	0.0464294	0.142702	0.348979	0.143763	0.137316	0.46145	0.107313	0.24973	0.2485	0.397549	0.048369	0.229748	0.19637	0.170092	0.220256	0.220848	0.623856	0.251662	0.0169987	0.0418475	0.140869	0.0959497	0.0761628	0
Abca2	0.103562	0.186473	0.172621	0	0.0752305	0.153544	1.40776	0.104053		0.0406076	0.035852	0.0966867	0	0.055545	0.113556	0.0173403	0.0644424	0.0505475	0.0241941	0.164547	0.0668309	0.0132549	0.0589555	0.0382494	0.0176363	0.0444329	0.0991631	0.100447	0.0708703	0.102271	0.0492213	0.0968085	0.0839501	0.0673283	0.0879897	0.104394	0.0617405	0.0641129	0.100463	0	0.0413471	0.0241571	0.0198842	0.041398	0
Abca3	0.138036	0.117329	0.241249	0.128259	0.121975	0.307088	0.703878	0.218552		0.0665074	0.0642471	0.0487579	0	0.0622391	0.210391	0.0139492	0.00990881	0.0376739	0.0230858	0.0426927	0.0600722	0.0107301	0.0310667	0	0.0462563	0.021265	0	0	0.0484736	0.0371866	0.0493102	0	0.0700755	0.0437636	0.0529827	0.0719639	0.0373742	0.0213872	0.0509064	0.019082	0.0174672	0	0	0.00814992	0
Abca4	0.0825881	0.0652502	0.051731	0	0.0483258	0	0	0.108036		0.016675	0.00857337	0	0	0.00149237	0	0.000938258	0.00291091	0.00164859	0.00192034	0	0.00150932	0	0.000748252	0	0	0.000447275	0	0	0.00117227	0	0.00213185	0	0.000538793	0.00192098	0.00407628	0.0010553	0.00195664	0	0.000899349	0	0	0	0	0.00352724	0
Abca5	0.018392	0.0551913	0.0161862	0	0.0214155	0	0	0.0215183		0.0185602	0.0172039	0.0744944	0	0.0776389	0	0.0576555	0.0485417	0.112892	0.0401117	0.118723	0.0773398	0.0481299	0.0872207	0.117064	0.0727471	0.0995878	0.0659309	0.0165066	0.0807079	0.0676506	0.0533439	0.0316966	0.0661833	0.0917308	0.107991	0.105379	0.0570242	0	0.0729218	0.0615108	0.0755645	0.134699	0.132871	0.0975873	0
Abca6	0.0391304	0.100702	0.0607884	0.188242	0.0752231	0.153544	0	0.0355063		0.0590527	0.0655084	0.278485	0	0.126515	0.180611	0.034894	0.0388229	0.26168	0.0588157	0.0889104	0.119494	0.0389193	0.0456572	0.456479	0.0794548	0.0741443	1.41232	0.243445	0.509735	0.603094	0.301971	0.221406	0.720172	0.342893	0.292238	0.799193	0.746382	0.333782	0.742525	0.253194	0.11478	0.177064	0.124321	0.136531	0
Abca7	0.0408487	0.0196919	0.0273592	0	0.0477988	0.153544	0	0.0743946		0.0366979	0.0189796	0.0955275	0	0.037951	0.0754569	0.0195314	0.0212761	0.0279142	0.0262761	0.0157067	0.0215502	0.00722969	0.0184604	0.0378212	0.011328	0.00856994	0	0.0476327	0.0302986	0.0425424	0.0293124	0.0679399	0.0297671	0.0242461	0.0457843	0.0368201	0.0280412	0	0.031285	0	0	0.0250662	0.0138649	0.0138188	0
Abca8a	0.0573672	0.794177	0.432228	0.127786	0.333042	0.314347	0	0.179246		0.107449	0.32484	2.1787	0.410193	0.926882	3.96266	0.144437	0.402532	2.75012	0.566568	1.00598	1.66916	0.115175	0.634855	4.87887	0.253177	0.75196	5.07671	1.99346	3.76997	6.13944	2.21428	2.82439	5.32494	2.04316	1.4478	4.68156	3.91845	3.91186	6.66294	1.98832	1.41993	1.84817	0.851513	1.15987	2.83921
Abca8b	0.0210125	0.171166	0.0836008	0	0.0488291	0	0	0.0372188		0.0225668	0.185364	0.53074	0.29375	0.113796	0.479978	0.030437	0.0994539	0.631523	0.0539445	0.283849	0.257247	0.0192474	0.0869307	0.247308	0.0406746	0.116648	0.863854	0.199579	0.589108	1.1934	0.265269	0.194272	0.76914	0.405505	0.313908	1.07423	0.622002	0.611085	1.09198	0.261975	0.13522	0.347641	0.293234	0.171832	0.359066
Abca9	0.0387068	0.134522	0.144321	0.197281	0.0943554	0.506433	0	0.0681527		0.0675639	0.0553524	0.0864284	0	0.111907	0.400995	0.0392418	0.0884033	0.321214	0.113115	0.109972	0.20088	0.0374071	0.0952042	0.25531	0.0578359	0.125464	0.386819	0.485393	0.387175	0.373783	0.181607	0.263763	0.378629	0.206317	0.230876	0.404845	0.368939	0.456591	0.485665	0.241111	0.28043	0.171242	0.10409	0.197062	0.415744
Abcb10	0.0216996	0.0151676	0.0912138	0	0.0297567	0	0	0.0545471		0.0416892	0.0444114	0.162329	0.0525547	0.0415125	0.0931787	0.0519938	0.0610253	0.0741221	0.0717487	0.0952634	0.0673589	0.0444338	0.0643221	0.0860275	0.0630816	0.0711435	0.193674	0.0263586	0.0783019	0.125923	0.0446861	0.196321	0.105893	0.0741644	0.0727773	0.116983	0.103759	0.0500408	0.131623	0.0413937	0.0157754	0.0730954	0.0179743	0.0610207	0
Abcb1a	0.0935696	0.168941	0.0366973	0.0979082	0.0836941	0	0	0.102587		0.0633113	0.0253249	0.0862478	0.105027	0.0390566	0	0.0330057	0.0175269	0.000989996	0.00467685	0.00471198	0.00400089	0.00907207	0.00307779	0	0	0.00134199	0	0	0.00516684	0	0.0243785	0	0.00857569	0.0145421	0.00164079	0.00640796	0.0109823	0	0.00322643	0	0	0	0.00523738	0.00376336	0
Abcb1b	1.28542	2.20533	1.7244	0.271741	0.840063	0.153544	0.703878	2.03247		0.543419	0.476885	0.239262	0.224827	0.17061	0	0.191602	0.160156	0.0590106	0.060647	0.147156	0.06775	0.116638	0.0686814	0.15172	0.055077	0.055833	0.158666	0.0692381	0.0741463	0.136322	0.0982885	0.0512904	0.11076	0.0606983	0.0517287	0.0810548	0.0736684	0.0277493	0.0694113	0.0169987	0.0553564	0.107674	0.0388414	0.0632553	0
Abcb4	0.00157174	0	0	0	0.0022572	0	0	0.00279147		0.00152147	0	0.0074195	0	0	0	0.000338721	0.000174683	0	0.00238009	0	0.000982372	0.00134358	0.000278169	0	0	0.000329168	0	0	0.000852999	0	0	0	0.00242748	0.00251521	0.00359029	0.00285653	0	0	0.00128456	0	0	0	0	0	0
Abcb6	0.057662	0.0859085	0.0382906	0.0903342	0.0269585	0	0	0.0379136		0.0387785	0.0229801	0.109069	0.0525547	0.0417215	0.0726211	0.0554142	0.0678123	0.0528828	0.0491202	0.161539	0.0420724	0.0547905	0.0532827	0.133055	0.0282413	0.0524032	0.186804	0.0548352	0.070739	0.0716566	0.0293149	0.0306118	0.0694737	0.0546538	0.0475245	0.0960146	0.0854935	0.254636	0.0871652	0.0459817	0.0358125	0.0680698	0.116606	0.0511344	0
Abcb7	0.0588099	0.0579308	0.0613981	0.113464	0.0582249	0	0	0.0802661		0.0525796	0.0326899	0.0526988	0.0525547	0.066101	0	0.0572491	0.0508104	0.0473058	0.0352799	0.05992	0.0308515	0.040933	0.0391222	0	0.0304062	0.0440913	0.236287	0.132537	0.0646747	0.0761628	0.0462881	0	0.0562999	0.0582097	0.0731876	0.0620856	0.0757284	0.0106936	0.0691303	0.154896	0.0438233	0.0734619	0.085234	0.0679334	0
Abcb8	0.123923	0	0.152916	0.0606767	0.123967	0	0	0.128127		0.116855	0.0999129	0.0998713	0	0.11445	0.137091	0.0762233	0.106154	0.0813529	0.10697	0.195252	0.105748	0.0980373	0.0882433	0.113434	0.118702	0.0865802	0.165767	0.16645	0.0961417	0.107694	0.0664464	0.01469	0.084563	0.0923975	0.148272	0.10421	0.0697789	0.15379	0.0891166	0.0944867	0.118717	0.118075	0.082866	0.0698464	0
Abcb9	0.0217421	0	0.060506	0	0.0271296	0	0	0.0377221		0.0126929	0.00713216	0	0	0.0300517	0	0.0063368	0.00522488	0.00253242	0.00957366	0.00639694	0.00657052	0.0088822	0.0136408	0.0315736	0.020363	0.00874662	0	0	0.00509369	0	0.00776629	0.0679399	0.0110744	0.00193267	0.00278111	0.00583279	0.00447792	0	0.0040784	0	0	0	0.0096749	0.0031109	0
Abcc1	0.0531381	0.12149	0.135305	0.0606767	0.0839201	0	0	0.0673296		0.0820376	0.0788026	0.162021	0.117024	0.102861	0.171667	0.0963668	0.118319	0.158001	0.0830902	0.217728	0.115425	0.0757875	0.0991058	0.0962109	0.0113322	0.075196	0	0.0923727	0.111277	0.153442	0.126994	0.524049	0.10814	0.0762645	0.0933367	0.107548	0.11482	0.100969	0.106512	0.023176	0.0202491	0.0665769	0.0857547	0.0707309	0.221361
Abcc10	0.056643	0.0253212	0.0570567	0	0.0346888	0	0	0.0245349		0.0235105	0.0168636	0.022384	0.105109	0.0298636	0	0.0156299	0.0247655	0.0417071	0.0141221	0.094626	0.019149	0.0143432	0.0227141	0.0641443	0.0111823	0.0194095	0	0.041869	0.0201601	0.00749951	0.0202565	0	0.0304574	0.0228934	0.0118437	0.0256342	0.0336326	0.0106936	0.0355764	0	0.0152835	0	0.0191193	0.02149	0
Abcc3	0.0288039	0	0	0	0.03262	0.192086	0	0.0259377		0.0247919	0.00490393	0.00215262	0	0.0137475	0	0.0222615	0.0211701	0.00150545	0.00880553	0.015727	0.00597655	0.0126816	0.00868773	0	0	0.00627937	0	0.0934929	0.0037775	0	0.00476891	0	0.000407961	0.00887054	0.0131459	0.00144165	0.00933703	0	0.000987332	0	0	0	0.0104741	0.00281476	0
Abcc4	0.0213734	0	0.0153761	0	0.014845	0	0	0.0126605		0.0146278	0.0120816	0.0722668	0.0722439	0.0278585	0	0.0313306	0.0325364	0.0240441	0.0163273	0.0227699	0.0171118	0.0215571	0.0227934	0	0	0.0178451	0.0680828	0.00669936	0.0212852	0.034363	0.0170268	0	0.0309952	0.0175599	0.0253933	0.025599	0.0292467	0.083814	0.0354406	0	0	0.0164236	0.0159291	0.00985677	0.226783
Abcc5	0.225963	0.250292	0.34064	0.0749991	0.252104	0	0	0.228547		0.152918	0.140393	0.224745	0.301846	0.189464	0.422028	0.124188	0.171603	0.286502	0.168012	0.252866	0.263672	0.129731	0.233877	0.314064	0.0516636	0.231013	0.283783	0.225593	0.189483	0.251051	0.205425	0.16497	0.255386	0.191728	0.162351	0.234933	0.187411	0.502373	0.25037	0.176609	0.0358125	0.124062	0.129295	0.0994135	0
Abcc8	0	0	0	0	0	0	0	0		0	0	0	0	0	0	0	0	0	0	0	0	0	0	0	0	0	0	0	0	0.0125719	0	0	0	0	0	0	0	0	0.000188047	0	0	0	0	0	0
Abcc9	0.00355723	0.0262885	0.0294929	0	0.0184027	0	0	0.00336238		0.00884601	0.0217623	0.195076	0	0.129655	0.0858925	0.00439293	0.0261156	0.0891825	0.00737218	0.033792	0.0404604	0.00263812	0.010821	0.0373095	0	0.00963674	0.0632511	0	0.131956	0.128851	0.321273	0.0414912	0.177745	0.0306455	0.0253022	0.0330359	0.094517	0.168581	0.18326	0.0173507	0.0418475	0.214007	0	0.00448769	0
Abcd1	0.189968	0.336585	0.113178	0.0606767	0.147862	0	0	0.169394		0.0731438	0.10187	0.0518524	0	0.0815331	0.053492	0.0365591	0.0602628	0.0757177	0.0505818	0.0401474	0.0695172	0.0485266	0.0687907	0.0566685	0.0718223	0.0456264	0.0845409	0.0462057	0.0703618	0.0808095	0.0495459	0.0803809	0.0913123	0.0575386	0.0793842	0.0845668	0.0588944	0.0481831	0.0984879	0.0187427	0.106143	0.0707971	0.0344007	0.0525569	0
Abcd2	0	0	0	0	0.0105232	0.153544	0	0.00344603		0.00672012	0.00533842	0.0171888	0.152583	0.080183	0.0524973	0.00867144	0.0109485	0.00904695	0.021418	0.00639228	0.0232398	0.0141147	0.0125127	0.0541844	0.0276446	0.0114519	0.179052	0.0816066	0.0364092	0.0327774	0.057784	0.0445937	0.0763428	0.0204192	0.0059625	0.0317554	0.0482208	0.0228365	0.0464898	0	0.0323248	0	0.00458641	0.0106313	0
Abcd3	0.302062	0.293719	0.438611	0.218594	0.357211	0.537716	0	0.35123		0.307797	0.177899	0.268361	0.349626	0.387996	0.359028	0.285734	0.334962	0.317732	0.404617	0.491431	0.394614	0.262809	0.358589	0.503468	0.318666	0.451552	0.278888	0.570177	0.424035	0.357398	0.378353	0.262966	0.394232	0.401912	0.402537	0.372661	0.430689	0.314515	0.39154	0.487632	0.490079	0.351101	0.314403	0.442362	0.503651
Abcd4	0.170031	0.250375	0.239205	0.265374	0.18093	0	0	0.283431		0.134853	0.166786	0.205806	0.105027	0.167415	0.313789	0.115201	0.146136	0.256478	0.148427	0.271683	0.228443	0.137827	0.16921	0.167816	0.126539	0.139886	0.416008	0.123463	0.194709	0.111146	0.142474	0.0761876	0.210292	0.15811	0.202799	0.219724	0.176979	0.16178	0.222798	0.0864199	0.155917	0.11404	0.0951981	0.102325	0
Abce1	0.360166	0.213787	0.290544	0.575329	0.249928	0	1.40776	0.260659		0.44289	0.397963	0.444435	0.483563	0.321282	0.207273	0.554122	0.537426	0.408838	0.377062	0.429531	0.341665	0.420448	0.339219	0.286856	0.378402	0.397482	0.274025	0.387271	0.398535	0.262027	0.276399	0.227295	0.312434	0.39619	0.442954	0.369122	0.384871	0.364592	0.366866	0.494152	0.534724	0.425845	0.460895	0.52832	0.221361
Abcf1	0.884118	0.984839	0.901036	0.789104	0.721639	1.44221	0.703878	0.737753		0.818695	0.819987	0.842845	0.496195	0.596076	0.582274	0.753147	0.80997	0.674519	0.507602	0.512582	0.541486	0.607338	0.491501	0.610853	0.599843	0.568031	0.467669	0.628254	0.670637	0.692013	0.501399	0.523847	0.597412	0.673496	0.596993	0.679127	0.723559	0.356641	0.639191	0.655609	0.971226	0.964048	0.893475	0.752733	1.34056
Abcf2	0.385163	0.196314	0.180316	0.180415	0.239009	0	0	0.213748		0.367563	0.282729	0.428027	0.294377	0.196102	0.75759	0.405379	0.441195	0.230489	0.318755	0.435575	0.226156	0.369178	0.24862	0.264898	0.319572	0.359913	0.0845409	0.230078	0.311765	0.309093	0.239457	0.753846	0.255239	0.373434	0.306362	0.323824	0.377131	0.166457	0.309362	0.520278	0.338982	0.453046	0.44773	0.457996	0.226783
Abcf3	0.276477	0.239128	0.311109	0.379673	0.215069	0.192086	0	0.21562		0.258008	0.135483	0.264573	0.222051	0.190226	0.312356	0.213649	0.211422	0.212607	0.239477	0.208993	0.184875	0.229298	0.16434	0.214774	0.276718	0.227403	0.0680828	0.187438	0.229	0.189431	0.304866	0.215637	0.305484	0.282067	0.230539	0.29117	0.283178	0.460386	0.263904	0.195352	0.143204	0.18807	0.0998604	0.197148	0
Abcg1	0	0	0	0	0.00149505	0	0	0		0.000931524	0.00471892	0.0245394	0	0.00867988	0	0.00111582	0.00888592	0.0164616	0.0225137	0.00464775	0.0260082	0.00830323	0.0202886	0.0168666	0	0.0183465	0	0	0.011854	0	0.00999721	0	0.00406606	0.00357485	0.0230944	0.00465875	0.00829727	0	0.0105406	0.0307154	0	0	0	0.00889795	0
Abcg2	0.322146	0.258705	0.173612	0.533377	0.205533	0	0	0.230841		0.30306	0.207999	0.300754	0.105109	0.207719	0.0616101	0.262743	0.293598	0.225617	0.319791	0.346192	0.236469	0.302109	0.243613	0.167263	0.284415	0.341296	0.0659309	0.373738	0.323687	0.302172	0.248479	0.364683	0.198983	0.347885	0.302658	0.230018	0.308358	0.445725	0.21536	0.319658	0.409719	0.38565	0.508997	0.5684	0
Abcg3	0	0	0	0	0	0	0	0		0	0	0	0	0.00226034	0	0	0	0	0	0	0	0	0.000279139	0	0	0.000249941	0	0	0	0	0	0	0	0	0	0	0	0	0	0	0	0	0	0	0
Abcg4	0.00244378	0	0	0	0.00247567	0	0	0		0.00217362	0	0.0115765	0	0.00798172	0	0.00173563	0.00232057	0.0063951	0.00827234	0.005266	0.01485	0.0010188	0.00311667	0	0	0.00472425	0.0680828	0	0.0114647	0.00962583	0.00867618	0	0.0167451	0.0092925	0.00662966	0.0177222	0.00271038	0	0.0134706	0	0	0.0390621	0	0.00205903	0
Abhd10	0.206332	0.157738	0.118964	0.162418	0.141615	0	0	0.135638		0.20306	0.118206	0.110059	0.157581	0.119049	0.172188	0.214742	0.186392	0.120981	0.190932	0.113265	0.143701	0.166331	0.135353	0.169506	0.174954	0.187946	0.319474	0.117294	0.176928	0.1836	0.227024	0.0859854	0.174393	0.214617	0.129458	0.166813	0.20917	0.100024	0.15858	0.640046	0.326728	0.359153	0.323298	0.299877	0.226783
Abhd11	0.603115	0.318703	0.351564	1.16583	0.463244	0.506433	0	0.45678		0.529923	0.311524	0.564939	0.834284	0.413074	0.800555	0.441637	0.442849	0.443182	0.367205	0.265277	0.364681	0.408819	0.33025	0.379509	0.471915	0.321513	0.24696	0.425046	0.413494	0.459491	0.373513	0.593821	0.440894	0.440136	0.367122	0.463198	0.5564	0.505544	0.440574	0.408334	0.456222	0.508014	0.523528	0.400132	1.0895
Abhd12	0.316207	0.383683	0.394782	0.127786	0.317776	0	0.703878	0.318541		0.292691	0.276366	0.403682	0.201817	0.280288	0.328104	0.29091	0.311073	0.301298	0.290686	0.293413	0.29277	0.273129	0.264481	0.306716	0.234003	0.299504	0.284976	0.304562	0.353071	0.442197	0.311978	0.345506	0.440514	0.355919	0.352552	0.431935	0.417916	0.263889	0.419224	0.340498	0.39822	0.460929	0.493654	0.360155	0.730435
Abhd13	0.133163	0.256954	0.0719907	0.0527869	0.100853	0	0	0.143211		0.125169	0.0888172	0.160479	0.157581	0.111574	0.210412	0.118794	0.117108	0.101651	0.104536	0.13803	0.110393	0.0927306	0.10649	0.0821482	0.139646	0.118117	0	0.0643627	0.125519	0.1261	0.123305	0.111339	0.128889	0.124885	0.119153	0.134683	0.128484	0.103585	0.149715	0.0953042	0.192937	0.155784	0.0875758	0.138047	0.359066
Abhd14a	0.468738	0.316669	0.457794	0.192075	0.486203	1.25013	0.703878	0.515774		0.394147	0.338237	0.590843	0.346305	0.518578	0.892679	0.347905	0.430389	0.464148	0.514142	0.504734	0.619655	0.446352	0.568309	0.940361	0.563112	0.512314	0.754252	0.374929	0.649763	0.688822	0.635075	0.876067	0.715832	0.593646	0.576412	0.637628	0.654215	0.45173	0.679361	0.192861	0.444076	0.563713	0.219948	0.426866	0.780232
Abhd14b	0.186221	0.149607	0.299236	0.255414	0.232038	0.467891	0	0.284114		0.117355	0.0925036	0.282068	0.0722439	0.270878	0.617939	0.0663749	0.131654	0.419442	0.257887	0.152468	0.274646	0.148891	0.236284	0.358167	0.166812	0.155497	0.331758	0.275817	0.286956	0.365331	0.296991	0.0668885	0.434619	0.19019	0.211077	0.361636	0.272121	0.228705	0.391811	0.0225665	0.0842619	0.184803	0.0494736	0.0950815	0.359066
Abhd15	0.00267871	0.0551913	0.00600369	0	0.0040427	0	0	0.00339881		0.00798213	0.00646766	0.00896087	0	0.00628949	0	0.00849695	0.00946762	0.0310934	0.0138904	0.0011455	0.0118232	0.0106959	0.00845911	0	0	0.0105212	0	0.0412609	0.0263556	0.029194	0.00622307	0	0.00672948	0.0245303	0.0499557	0.0167856	0.0181828	0.0421376	0.0189142	0	0	0.0496268	0.033573	0.0209807	0
Abhd16a	0.825144	0.889704	1.02411	0.526443	0.696216	0.499174	0.703878	0.785426		0.57433	0.43932	0.757777	0.854332	0.717366	0.410707	0.543862	0.555514	0.800387	0.796709	0.696629	0.750019	0.689342	0.625127	0.941759	0.597912	0.827438	1.02479	0.554266	0.919439	1.01412	1.04983	0.973642	1.26611	0.929671	0.757322	1.11384	0.968971	1.05021	1.03736	1.17885	0.609477	0.849532	0.83196	0.696566	1.27158
Abhd17a	0.791495	0.953517	0.729906	0.8198	0.621997	0.153544	0	0.687196		0.503605	0.506045	0.594733	0.269286	0.597446	0.655408	0.43138	0.627251	0.586881	0.54268	0.226804	0.673017	0.673553	0.604801	0.669425	0.415248	0.408175	0.580433	0.516343	0.538577	0.504929	0.336698	0.0811954	0.363505	0.432143	0.59437	0.462172	0.442626	0.576515	0.587549	0.151244	0.74313	0.593672	0.22352	0.503043	0.221361
Abhd17b	0.241845	0.470023	0.150837	0.444761	0.227883	0	0	0.201013		0.225751	0.159628	0.287759	0.205138	0.265197	0.397382	0.212683	0.189584	0.216288	0.221817	0.274453	0.185447	0.174748	0.179843	0.168195	0.155219	0.205467	0.463347	0.167561	0.218466	0.155041	0.204913	0.0943849	0.194028	0.23734	0.227816	0.225431	0.265799	0.30299	0.24023	0.432513	0.450138	0.345711	0.461826	0.254115	0.388765
Abhd17c	0.347496	0.372751	0.314648	0.129698	0.244607	0.153544	0	0.329708		0.244233	0.19084	0.101782	0.124799	0.149158	0	0.270131	0.209456	0.244899	0.251935	0.17779	0.188851	0.254539	0.205528	0.168761	0.202784	0.256995	0.280865	0.116205	0.140213	0.0969395	0.134984	0.0830282	0.107085	0.16235	0.179763	0.121891	0.178869	0.195126	0.145999	0.402201	0.287628	0.251247	0.35445	0.322991	0.359066
Abhd18	0.0489263	0.0188421	0.0856936	0	0.0680808	0	0	0.048814		0.052707	0.0360482	0.0389273	0	0.0804172	0.137067	0.047389	0.0531836	0.163411	0.0927034	0.101538	0.0951361	0.0575587	0.0746468	0.134003	0.036804	0.0739276	0.133296	0.0817528	0.0913063	0.130817	0.112158	0	0.123346	0.0707191	0.0600135	0.103258	0.0859629	0.0340267	0.122522	0.0262147	0.0157754	0.046061	0.017653	0.0426257	0
Abhd2	0.436524	0.770409	0.704108	0.393711	0.491216	1.88537	2.81551	0.454665		0.689985	0.226392	0.683254	0.0644695	0.661123	0.221164	0.643619	0.560083	0.753804	0.376451	0.564899	0.506637	0.338633	0.381657	0.100651	0.282547	0.564789	0.481733	0.298288	0.338211	0.259808	0.386522	0.749229	0.357108	0.291488	0.448437	0.454366	0.294691	0.285849	0.355984	0.37253	0.478586	0.337231	0.297549	0.466125	0.503651
Abhd3	0.00227711	0.0698105	0	0	0.0177221	0	0	0.0230538		0.0117912	0.00963019	0.0244325	0	0.0186867	0	0.0102516	0.0118187	0.0200817	0.0303732	0.0170073	0.0480354	0.0140703	0.0281633	0.0812084	0.0434071	0.0372676	0	0.041869	0.0474077	0.0895497	0.0718132	0.0265508	0.0726672	0.0429139	0.0312757	0.0638997	0.0555156	0.418375	0.084387	0.0450862	0.0250344	0.0197083	0.0308252	0.0143631	0
Abhd4	0.367273	0.268106	0.417764	0.150695	0.415447	0.69126	0	0.359296		0.352091	0.2215	0.368492	0.28652	0.367991	0.143587	0.233047	0.239194	0.361089	0.3253	0.211221	0.420288	0.361704	0.335139	0.330301	0.154518	0.275896	0.24696	0.158408	0.308668	0.265141	0.263803	0.537267	0.354352	0.24423	0.332201	0.344556	0.274112	0.68304	0.359239	0.132444	0.0623978	0.174925	0.145239	0.177318	0
Abhd5	0.299716	0.16098	0.108627	0.351168	0.220232	0.153544	0	0.204035		0.29381	0.204643	0.331508	0.149263	0.296347	0.496739	0.372092	0.354195	0.359355	0.318854	0.306897	0.275267	0.322064	0.283768	0.357579	0.415467	0.321839	0.226373	0.396299	0.334596	0.300226	0.239669	0.261385	0.248474	0.430699	0.414038	0.36371	0.38568	0.353556	0.31292	0.240235	0.182693	0.286302	0.300278	0.293852	0
Abhd6	0.223195	0.171122	0.207981	0.301706	0.128505	0.192086	0	0.192551		0.181099	0.106372	0.0796929	0.278202	0.057972	0.164843	0.0704009	0.0517193	0.039781	0.0506245	0.115354	0.0617381	0.0678428	0.0532474	0	0.0512373	0.0661538	0	0.00614628	0.0370393	0.0350253	0.0770581	0.0250197	0.0546238	0.0801777	0.0538528	0.0501729	0.0423532	0.0215974	0.0273189	0	0	0.0460641	0.0145898	0.0414855	0
Abhd8	0.155284	0.227966	0.409104	0.135676	0.175146	0.659977	0.703878	0.245321		0.123813	0.295401	0.321986	0.29375	0.269465	0.410906	0.198186	0.345732	0.527821	0.315629	0.379616	0.44151	0.248292	0.29535	0.486808	0.284678	0.268947	1.10569	0.134613	0.523402	0.596205	0.323143	0.494657	0.542821	0.386526	0.435643	0.576573	0.439582	0.373556	0.690627	0.547932	0.663325	0.57722	0.38137	0.532762	0.939494
Abi1	0.684307	0.647603	0.56878	0.326979	0.647638	0.314347	0	0.721132		0.509154	0.374754	0.46838	0.456107	0.586784	0.415473	0.492186	0.459969	0.594947	0.371373	0.568394	0.477705	0.350125	0.386971	0.384528	0.364597	0.358646	0.759979	0.579429	0.512254	0.400647	0.578891	0.513198	0.414051	0.532506	0.60063	0.492765	0.475569	0.281367	0.446084	0.364335	0.352494	0.605968	0.441537	0.4078	0.194382
Abi2	0.164642	0.246774	0.171757	0.21902	0.227343	0.153544	0	0.233234		0.244661	0.205126	0.225188	0.213732	0.260527	0.167815	0.175369	0.165241	0.230838	0.164868	0.440719	0.171548	0.140226	0.184859	0.203187	0.132529	0.188615	0.179052	0.0232743	0.242336	0.259761	0.224342	0.891535	0.222178	0.194462	0.198309	0.233529	0.22461	0.155156	0.262988	0.21888	0.135262	0.232947	0.18168	0.220866	0.194382
Abi3	0.0110681	0	0.00600369	0	0.0319627	0	0	0.0084376		0.0203146	0.0150108	0.0991536	0	0.0343837	0	0.00887782	0.00592633	0.021504	0.000921549	0	0.00891455	0.00292651	0.00280621	0	0	0.00158441	0	0	0.00353867	0	0.0093196	0	0.00345408	0.00109468	0.00503745	0.00341272	0.00458474	0	0.00338594	0	0	0.00512215	0	0.00350943	0
Abi3bp	0.578841	0.723234	0.819833	0.529699	0.713733	0.34563	1.40776	1.00467		0.247944	0.215917	0.665679	0.651612	0.67223	0.420111	0.162608	0.284152	0.969602	1.15016	1.9021	1.06637	0.289164	1.05681	0.839368	0.821259	1.50915	0.990643	0.675859	1.17528	1.11377	1.47569	1.56557	1.32082	0.86924	0.727642	1.19511	0.96883	0.944233	1.10309	0.424368	0.342237	0.938456	0.294654	0.468606	0.415744
Abl1	0.086629	0.217839	0.191428	0.281164	0.17683	0.307088	0	0.183084		0.136891	0.144498	0.26538	0.362995	0.261207	0.233221	0.15304	0.195954	0.220635	0.125825	0.21374	0.198865	0.117652	0.179297	0.181006	0.104199	0.15616	0.337808	0.105701	0.200651	0.167072	0.1787	0.371413	0.219562	0.119304	0.193446	0.238294	0.177364	0.238535	0.247316	0.131606	0.291368	0.431422	0.159687	0.236587	0
Abl2	0.0900478	0.111726	0.0688256	0.0489541	0.0735701	0	0	0.0905796		0.130483	0.109712	0.124554	0.197042	0.106881	0.282979	0.125782	0.0956753	0.0755993	0.0842517	0.104233	0.0856693	0.0623855	0.0789363	0.113347	0.0664467	0.0705339	0.474999	0.0712888	0.0747402	0.0604492	0.06844	0.123377	0.064663	0.0910074	0.114734	0.0702513	0.0838603	0	0.0807658	0.044864	0.0872435	0.064937	0.108896	0.0563397	0
Ablim1	0.195939	0.217999	0.372749	0.0690217	0.268356	0.34563	0	0.288652		0.118434	0.190995	1.01813	0	0.447247	1.07917	0.0671104	0.111969	0.668726	0.12485	0.12311	0.273832	0.0506001	0.102749	0.321847	0.12619	0.100536	0.983947	0.140142	0.725393	0.799928	0.666859	0.471909	0.846421	0.869524	0.966332	1.39665	0.850823	0.730098	0.935232	0.135489	0.134079	0.599452	0.216786	0.15958	0.58585
Ablim2	0.0167923	0.0367368	0.0130343	0	0.0116783	0	0	0.0212741		0.00605779	0.00453987	0.0302567	0	0.000604007	0	0.00139321	0	0.00157642	0.00282756	0	0.00184816	0.000744494	0.00218465	0	0	0.000826807	0	0	0.00895218	0.0290564	0.0150265	0.0484395	0.019004	0.00617903	0.00693037	0.00450246	0.00212112	0	0.00637203	0	0	0.0078649	0.011483	0	0
Ablim3	0.118056	0.240426	0.283065	0	0.145436	0	0	0.156097		0.0427416	0.0579983	0.12135	0	0.0146409	0	0.0142314	0.00764996	0.100284	0.0156438	0.0650746	0.0315637	0.0104558	0.0101262	0	0.0169864	0.00875357	0.0680828	0	0.0349615	0	0.0544429	0.0461247	0.0292117	0.0498348	0.0519198	0.0364748	0.0431839	0.0159207	0.0312395	0	0	0.0594296	0	0.00981092	0
Abr	0.0676432	0.0410451	0.159731	0	0.0890238	0	0	0.0433931		0.0697084	0.0786131	0.121633	0	0.0635386	0.0524973	0.0640023	0.0486675	0.0610596	0.0401275	0.0617187	0.0670172	0.0394909	0.0803322	0.0281913	0.0257007	0.0721771	0	0	0.0731044	0.0495118	0.0585167	0	0.0970325	0.0518196	0.0667618	0.0952326	0.0377495	0.0847349	0.0948788	0.0638289	0.0633729	0.0561452	0.0446315	0.0520393	0.226783
Abra	0.0461419	0.10069	0.0410216	0	0.0154269	0	0.703878	0.0571624		0.0091573	0.00158426	0.00272618	0	0	0	0.00113327	0.00108131	0.0243466	0	0	0.00343461	0.00201487	7.34494e-05	0	0	0.000192679	0	0.0313716	0.000385066	0.0239556	0.000945457	0	0.00129319	0	0	0.000274106	0	0	0.00147247	0	0	0.00577133	0	0.000784391	0
Abracl	2.88593	2.10104	1.32967	3.02236	2.22059	0.192086	3.51939	2.30544		3.28907	1.8157	1.09904	3.85315	2.10415	0.815742	3.56797	2.78637	1.16946	1.92023	1.24007	1.42204	3.19944	2.01911	1.01515	3.23333	1.8746	0.997562	1.8393	1.3185	0.807121	1.6841	1.15569	0.767772	1.88449	1.61931	0.896354	1.5974	1.40146	0.834295	1.50549	1.83217	1.22114	2.43953	1.9692	1.44432
Abraxas1	0.0790389	0.0993389	0.0788303	0.0489541	0.0633763	0.314347	0	0.0636693		0.0993162	0.0581549	0.163144	0.301846	0.0561997	0.0867656	0.0810077	0.0615065	0.0896763	0.090289	0.0829392	0.0668617	0.0555339	0.0635781	0.147954	0.0361266	0.0963955	0.226929	0.0661065	0.0923083	0.134728	0.0987554	0.0511679	0.0995981	0.0945	0.0713584	0.110552	0.0788403	0.127879	0.0974666	0.222161	0.153367	0.168416	0.139324	0.137235	0.226783
Abraxas2	0.389069	0.307253	0.239653	0.152774	0.320636	0	0	0.302821		0.302845	0.310064	0.245771	0.399404	0.252598	0.24635	0.284669	0.29147	0.31048	0.324139	0.399742	0.26115	0.268048	0.254563	0.11657	0.361426	0.336573	0.290799	0.220148	0.27389	0.189023	0.266226	0.123761	0.246392	0.304791	0.268539	0.260105	0.317937	0.0727611	0.240811	0.339469	0.359977	0.280659	0.263648	0.308037	0
Abt1	0.216906	0.217712	0.261121	0.361462	0.207523	0	0.703878	0.164585		0.236671	0.113469	0.295037	0.152583	0.163496	0.219383	0.206943	0.201897	0.181352	0.190678	0.20594	0.161399	0.181499	0.154227	0.109447	0.18531	0.184895	0.263352	0.538406	0.209621	0.250263	0.206932	0.219942	0.256204	0.215867	0.193661	0.224736	0.220169	0.237604	0.225426	0.416993	0.113281	0.313838	0.154355	0.215954	0.194382
Abtb1	0.142316	0.0392341	0.207832	0	0.178239	0	0	0.179243		0.104321	0.188687	0.849781	0.105027	0.109562	0.0754569	0.0671054	0.0962507	0.386254	0.172846	0.216651	0.165711	0.0991198	0.145314	0.14577	0.12669	0.133382	0.163498	0.107752	0.15575	0.202546	0.158366	0.87924	0.180865	0.13898	0.161931	0.181562	0.133099	0.360392	0.172833	0.0692054	0.0866608	0.0852487	0.0549123	0.0963327	0.194382
Abtb2	0.00985935	0.0188421	0.00548379	0	0.0133999	0	0	0.0138894		0.0193425	0.0264648	0.0366651	0	0.0515649	0.0685453	0.05592	0.0761346	0.0930722	0.0406768	0.0627834	0.0865071	0.0262178	0.0495462	0.0811707	0.0179462	0.0579041	0.158666	0.0152821	0.0410409	0.0305108	0.0334475	0.0509103	0.0393528	0.0470929	0.106985	0.0669609	0.0349624	0.133005	0.0525394	0	0.0202491	0.0725144	0.05763	0.0450507	0.221361
AC034116.3	0	0	0	0	0.000573905	0	0	0		0	0	0	0	0	0	0	0	0	0	0	0.00146852	0	0.000198002	0.0372992	0	0.000409964	0	0	0.00104581	0	0	0	0.000511154	0	0	0.000266429	0	0	0.000746008	0	0	0	0	0	0
AC061963.1	0.00151949	0	0	0	0.000811295	0	0	0.00733711		0.0011049	0	0.00252091	0	0.00123651	0	0.000981317	0.00159493	0	0	0.0136752	0.0010788	0.00172285	0.0016391	0	0.00814001	0.00127657	0	0	0.00166889	0	0.00182878	0	0.00106392	0.00384206	0.00183769	0.000939559	0.00110192	0	0.00132035	0	0	0.0099724	0	0.00203133	0
AC078895.1	0	0	0	0	0	0	0	0		0	0	0	0	0	0	0	0.000201599	0	0	0	0	0	0.000433791	0	0	5.99481e-05	0	0	0.00139626	0	0	0	0	0	0	0	0	0	0	0	0	0	0	0	0
AC079680.1	0	0	0	0	0	0	0	0		0.000279562	0	0	0	0.000700388	0	0.000824957	0.000599816	0	0	0	0	0	0.00101799	0	0	0.000506572	0	0	0.000405616	0	0.00392828	0	0	0.000725012	0	0	0	0	0	0	0	0	0	0.00259454	0
AC079680.2	0	0	0	0	0	0	0	0		0.00193351	0	0	0	0	0	9.467e-05	0	0	0	0	0	0.0015738	0	0	0	0	0	0	0	0	0.00216429	0	0	0	0	0	0	0	0	0	0	0	0	0	0
AC087898.2	0	0	0	0	0.00157915	0	0	0		0	0	0	0	0	0	0	0.000306271	0	0	0	0	0	0.000407699	0	0	7.48617e-05	0	0	0	0	0	0	0	0	0	0	0	0	0	0	0	0	0	0	0
AC101921.1	0	0	0	0	0.00159151	0	0	0		0	0	0	0	0.000611357	0	0	0	0	0	0	0	0	0	0	0	6.11286e-05	0	0	0.00224705	0	0	0	0	0	0	0	0	0	0	0	0	0	0	0	0
AC102103.1	0	0	0.0109619	0	0.0122039	0	0	0		0	0	0	0	0.000856549	0	0	0.000626991	0	0	0.000798765	0.00143665	0	0.00132027	0	0	0.000914385	0	0	0.00138423	0	0	0	0.000969372	0	0	0.00108123	0	0	0.00039369	0	0	0	0	0.002535	0
AC102334.1	0	0	0.00571113	0	0.00257123	0	0	0		0.000313681	0	0	0	0.000826948	0	0.000589842	0.000785106	0	0.00469783	0.000764852	0.00147841	0.00667332	0.00283929	0	0	0.00272299	0	0	0.000914855	0	0.00595216	0	0.00225982	0.000671116	0	0.000177902	0.00512457	0	0.00247207	0	0	0	0	0.00034164	0
AC102815.1	0	0	0	0	0	0	0	0		0	0	0	0	0	0	0	0.000680112	0	0	0	0.000645692	0	0.00151161	0	0	0.000743084	0	0	0.000531811	0	0	0	0.000494174	0	0.00158437	0.000915524	0	0	0.000196867	0	0	0	0	0	0
AC109617.1	0	0	0	0	0.000422864	0	0	0		0.000299212	0	0	0	0.0025952	0	0.00118888	0.000966964	0	0	0	0	0.000223805	0.000725589	0	0	0.00045121	0	0	0.000251575	0	0.00222569	0	0	0	0	0	0.000494435	0	0	0	0	0	0	0	0
AC109617.2	0	0	0	0	0.00213994	0	0	0		0.00246212	0.00118995	0	0	0.00733528	0	0.00252911	0.002022	0	0.00106276	0.0083817	0	0.0011326	0.000982374	0	0	0.000666678	0	0	0.000564296	0	0	0	0	0.00122587	0	0	0	0	0	0	0	0	0	0.00155315	0
AC110166.1	0	0	0	0	0	0	0	0.00544805		0.00265265	0	0	0	0.00488268	0	0.00818576	0.0101263	0	0.0124562	0.000862632	0.00452079	0.015043	0.015148	0	0.0165676	0.0204259	0	0	0.0028375	0	0.00154831	0	0.000831301	0.00177661	0.00328192	0.000279767	0.0101338	0	0.00127436	0	0.0359424	0	0.00695247	0.0156175	0.221361
AC110166.2	0	0	0	0	0.000990731	0	0	0		0	0	0	0	0	0	0	0	0	0	0	0	0	0.000179678	0	0	0.000303198	0	0	0.000156805	0	0	0	0	0	0.00206613	0	0	0	0	0	0	0	0	0	0
AC113595.1	0	0	0	0	0	0	0	0		0	0	0	0	0	0	0	0.000277233	0	0	0	0.00209891	0	0.00110059	0	0	0.00064883	0	0	0.000652245	0	0	0	0.000800069	0	0	0.000865709	0	0	0.00102956	0	0	0	0	0	0
AC113595.2	0	0	0	0	0.00210496	0	0	0		0	0	0	0	0	0	0	0	0	0	0.00172609	0.000417838	0	0.000739428	0	0	0.00108354	0	0	0.000533425	0	0	0	0.000943901	0	0	0.000542449	0	0	0.00109682	0	0	0	0	0	0
AC114585.1	0	0	0	0	0	0	0	0		0.000222049	0	0	0	0.000811241	0	0.000481086	0.000228423	0	0.00155542	0	0	0.00151584	0.000412272	0	0	0.00035457	0	0.0124434	0.000457058	0	0	0	0	0.0010446	0	0	0	0	0	0	0	0	0	0.00207906	0
AC116487.2	0	0	0.0121664	0	0.00136423	0	0	0.00364041		0	0	0	0	0.00166745	0	0	0.000742757	0	0	0	0.000402511	0	0.000967497	0	0	0.000414267	0	0	0.000946885	0	0	0	0.000652641	0	0	0	0	0	0.00091107	0	0	0	0	0.00185821	0
AC122413.1	0.00223438	0	0	0	0.0129439	0	0	0.00852962		0.0104945	0.00277025	0.00215262	0	0.0101653	0	0.00522978	0.0051525	0.00615774	0.0161258	0.00536954	0.00856345	0.010664	0.0126529	0	0.0328313	0.0113769	0	0.0568831	0.00718638	0	0.00949641	0	0.00621865	0.00587551	0.0074607	0.00566723	0.0050542	0	0.00956867	0	0	0.0324783	0	0.00516473	0
AC123059.1	0	0	0	0	0	0	0	0		0.000231559	0	0	0	0	0	0.000857824	0.000457075	0	0	0	0	0	0.000147758	0	0	0.0015325	0	0	0.00023456	0	0	0	0	0.0016328	0	0	0	0	0	0	0	0	0.00695247	0.000651025	0
AC123724.1	0.00873083	0	0	0	0.0252419	0	0	0.0257469		0.00579192	0.00469767	0.00329854	0	0.00699148	0	0.00328064	0.0030459	0.00234082	0.00222873	0.00368936	0.00907365	0.0044102	0.0073096	0	0	0.00631714	0	0	0.00548076	0.0200714	0.00603566	0	0.00450969	0.0038338	0	0.00618817	0.00910135	0	0.00370564	0	0	0	0	0.00471476	0
AC123870.1	0.00264763	0	0	0.0749991	0.0130007	0	0	0.00246059		0.00221941	0.0025211	0.0115187	0	0.00613479	0	0.00437711	0.0104301	0.00591918	0.0188302	0.00219388	0.0179067	0.00732339	0.0169154	0	0.0103239	0.018374	0	0.163934	0.0200288	0.0265248	0.0284137	0.0265508	0.0461972	0.0137953	0.0221256	0.0281057	0.0166278	0.018953	0.0181864	0	0	0.00920078	0.0106533	0.00712003	0
AC124739.1	0.00328282	0	0	0	0.00166456	0	0	0.00133448		0.00169995	0.000886367	0.00259729	0	0.0011878	0	0.000935405	0.00229945	0.00222494	0.0023681	0.00671231	0.000606295	0.00119039	0.00184558	0	0	0.00325219	0	0	0.00181216	0	0.00334179	0	0.00159838	0.00187944	0.0018846	0.00216285	0.00160156	0	0.00145229	0	0	0	0.0167679	0.00318464	0
AC124739.2	0.00677288	0.0239798	0	0	0.00466049	0	0	0.00338687		0.00330754	0	0.0389	0	0.00412838	0	0.00440396	0.00594816	0.0129867	0.00336353	0.00415792	0.00908483	0.00443051	0.00742014	0	0	0.00609491	0	0	0.00659902	0	0.00231098	0	0.00273803	0.00456055	0.0125313	0.00822264	0.0074101	0	0.003937	0	0	0.0117384	0	0.00467358	0
AC125141.1	0	0	0	0	0	0	0	0		0	0	0	0	0	0	0	0	0	0	0	0	0	0.000373626	0	0	0.000483628	0	0	0.000348005	0	0	0	0	0	0	0	0	0	0	0	0	0	0	0	0
AC125141.3	0	0	0	0	0	0	0	0		0	0	0	0	0	0	0	0	0.00613557	0	0	0	0	0	0	0	0	0	0	0	0	0	0	0.000517156	0	0	0.00124987	0	0	0.00017321	0	0	0	0	0	0
AC125149.3	0	0	0	0	0.0018964	0	0	0		0	0	0	0	0	0	0	0	0	0	0	0	0	6.42011e-05	0	0	0.000223775	0	0	0.00081193	0	0	0	0	0	0	0	0	0	0	0	0	0	0	0	0
AC126055.1	0.00447311	0	0.0237016	0	0.00596419	0	0	0.00670576		0.00423533	0.000903394	0.00141043	0	0.0104291	0	0.00517528	0.00478545	0.00637841	0.00702966	0.00757676	0.0238918	0.0105317	0.0119568	0	0	0.00834349	0	0.0244236	0.0329933	0.0174432	0.0037414	0	0.0229225	0.0156138	0.0252644	0.0202614	0.0354641	0.0747619	0.0230514	0.0251487	0	0	0.020108	0.0116561	0
AC126280.1	0.00292467	0	0	0	0	0	0	0		0.000893133	0.00175547	0.00592164	0	0.00172615	0	0.000242067	0.00338451	0.00665789	0	0	0.00318793	0.000384828	0.000974521	0	0.00933363	0.000969234	0	0	0.00170586	0	0	0	0.00253954	0.00116219	0	0.00228443	0	0	0.00125075	0	0	0	0	0	0
AC126936.1	0	0	0	0	0	0	0	0		0.00111173	0	0	0	0	0	0.000152263	0	0	0	0	0	0	0	0	0	0	0	0	0	0	0.00036152	0	0	0	0	0	0	0	0	0	0	0	0	0	0
AC127341.3	0.00826945	0.0237715	0.00614775	0	0.0154561	0	0	0.00465362		0.0206017	0.0112068	0.00261979	0	0.0150457	0	0.0167555	0.00589202	0.00315278	0.00295432	0.0225411	0.00681907	0.00525077	0.00275066	0.020186	0	0.00447092	0	0	0.00565043	0.0116527	0.00818551	0	0.00861971	0.00962515	0.00264616	0.00761411	0.0113199	0	0.00750813	0.0197973	0	0.0100664	0.00629524	0.00582297	0
AC127341.5	0	0	0	0	0.00273297	0	0	0.00272345		0	0.00370003	0	0	0.00066729	0	0	0.000205085	0	0	0.00165533	0	0	0.00090083	0	0	0.000875505	0	0	0.000185208	0	0	0	0	0	0	0	0	0	0	0	0	0	0	0	0
AC129178.1	0	0	0	0	0	0	0	0		0.000547964	0	0	0	0	0	0.00108049	0	0	0	0	0	0	0	0	0	0	0	0	0	0	0	0	0	0	0	0	0.00466757	0	0	0	0	0	0	0	0
AC129328.1	0.0164596	0.0215692	0.0283377	0	0.0337977	0	0	0.0178903		0.0145348	0.0188241	0.0244086	0	0.0211161	0.0614447	0.0111198	0.0165405	0.0449313	0.00956505	0.017006	0.0184015	0.00832433	0.0150086	0.0742166	0.0192079	0.0172942	0.0954153	0.041869	0.0315333	0.0469226	0.0268531	0	0.0260215	0.0297721	0.0360516	0.0266274	0.0297225	0.0777037	0.0271888	0.0264845	0.0212168	0.00900784	0	0.0207606	0
AC130815.2	0.00198259	0	0	0	0.00540425	0	0	0.0103396		0.00172544	0.019336	0.0389908	0	0.0137228	0	0.00443636	0.00769202	0.03055	0.00820108	0	0.015782	0.003863	0.0139163	0	0.0200268	0.012574	0	0.0172449	0.0590886	0.0646688	0.0423589	0	0.0653175	0.0630433	0.0432321	0.0568267	0.0738647	0.112132	0.0634399	0	0	0.00963525	0.0137596	0.0122536	0
AC130815.3	0.00104203	0	0	0.0749991	0.0087632	0	0	0		0.0155275	0.00423897	0.00182825	0	0.0317234	0	0.0180281	0.00837497	0.00576915	0.000670394	0.00658586	0.00145341	0.00471759	0.00124259	0	0	0.000880508	0	0	0.00452135	0.0089408	0.000727351	0	0.000757961	0.00481661	0.0167284	0.00787445	0.00438923	0	0.00572694	0	0.0201238	0.0102443	0	0.00147311	0
AC132444.6	0	0	0	0	0	0	0	0		0	0	0	0	0	0	0	0	0	0	0	0	0	0	0	0	0	0	0	0	0	0	0	0.000755565	0	0	0.000833689	0	0	0.000377907	0	0	0	0	0	0
AC133488.1	0	0	0	0	0.000440588	0	0	0		0	0	0	0	0	0	0	0.000268704	0	0	0	0	0	0.000313748	0	0	0.000537985	0	0	0.00020631	0	0	0	0.000451725	0	0	0.000775918	0	0	0.000513379	0	0	0	0	0	0
AC133498.1	0.00251435	0	0	0	0.000685618	0	0	0.00805085		0.00198314	0	0	0	0.000866876	0	0.00135286	0.000819809	0.00135856	0	0	0.00262788	0.000432945	0.00149896	0	0	0.00329728	0	0	0.000537035	0.00999763	0.000199954	0	0.000624248	0	0.00138182	0.000957777	0	0	0.000875806	0	0	0	0	0.00562067	0
AC133868.2	0.0430711	0.06422	0	0.0903342	0.0328372	0	0	0.0299636		0.0653567	0.0238068	0	0	0.00345821	0	0.0401265	0.0168141	0	0.002983	0.000764852	0	0.0246828	0.00297418	0	0.00607799	0.00148089	0	0.0199336	0.00106268	0	0.0106435	0	0	0.00781463	0.00106993	0	0.0060051	0.0353526	0	0	0.0157642	0	0.0143562	0.0040964	0
AC135964.1	0.00380436	0	0.00622333	0	0.000322973	0	0	0		0.00157791	0	0	0	0	0	0.000211118	0.00131352	0.00604897	0	0	0.00306735	0.00112415	0.00105861	0.0212979	0	0.00161865	0	0	0.000937885	0	0.000913203	0	0.00130899	0.00061345	0	0.00166671	0	0	0.00138169	0	0	0	0	0.000456155	0
AC135964.2	0	0	0	0	0.000529334	0	0	0		0	0	0	0	0	0	0	0	0	0	0	0	0	0.000592587	0	0	0.00168672	0	0	0.000275285	0	0	0	0	0	0	0	0	0	0	0	0	0	0	0	0
AC139347.1	0	0	0	0	0.00061746	0	0	0		0.000875103	0.00479957	0	0	0	0	0.00175135	0.000792084	0	0.00173286	0	0	0.000655103	0.000816218	0	0	0.00023885	0	0	0.000599888	0	0.00183899	0	0	0.00108077	0	0	0	0	0	0	0	0	0	0.00118249	0
AC139671.1	0	0	0.0118124	0	0	0	0	0		0	0	0	0	0	0	0	0	0	0	0	0	0	0	0	0	0	0	0	0	0.00869375	0	0	0.000167305	0	0	0.000176011	0	0	0.000827574	0	0	0	0	0	0
AC139844.1	0.0195573	0.0195422	0	0	0.00402557	0	0	0.00767288		0.00432649	0.00227508	0	0	0	0	6.53752e-05	0	0	0.00736253	0	0	0	0	0	0	0	0	0	0	0	0	0	0	0	0	0	0	0	0	0	0	0	0	0	0
AC140186.1	0	0	0	0	0	0	0	0		0.000643277	0	0	0	0.0020224	0	0.00120743	0.00124122	0.0019125	0	0.00516089	0.000897549	0	0.000161216	0	0	0.00104662	0	0	0.000639076	0	0.00672911	0	0.000608891	0	0	0.00139073	0	0	0.000914927	0	0	0	0	0.00475734	0
AC140304.2	0	0	0	0	0.00141429	0	0	0		0.00227213	0.00147951	0	0	0.00158949	0	0.00480102	0.00121666	0	0.00174019	0	0	0.00203495	0.00104685	0	0	0.00178078	0	0	0.00162669	0	0.000718306	0	0.00130978	0.00411015	0	0.000713455	0.00119987	0	0.000745431	0	0	0	0	0.0026577	0
AC141880.1	0	0	0	0	0	0	0	0		0	0	0	0	0.000943875	0	0	0.000320217	0	0	0	0	0	0.000638783	0	0	0.000134518	0	0	0.000190498	0	0	0	0	0	0	0	0	0	0	0	0	0	0	0	0
AC144408.3	0	0	0	0	0.000222836	0	0	0		0	0	0	0	0	0	0	0.000419394	0	0	0	0	0	0.000579458	0	0	0.00164673	0	0	0.000717365	0	0	0	0	0	0	0	0	0	0	0	0	0	0	0	0
AC146911.1	0.016891	0.0448634	0.00839497	0	0.0192308	0	0	0.0206081		0.0159494	0.00484983	0.0152958	0	0.017778	0	0.0139863	0.0124884	0.00483313	0.0188197	0.0805264	0.0204555	0.0161665	0.0159545	0	0.00607799	0.0255422	0	0.00669936	0.0188053	0.0198214	0.00781775	0.019574	0.0234911	0.0190885	0.0160487	0.0239006	0.0156409	0	0.0186593	0	0	0.023774	0	0.0103956	0
AC149090.1	0.209868	0.116499	0.273859	0.346853	0.418128	0.506433	0.703878	0.335154		0.191432	0.163416	0.470359	0.105027	0.359975	0.176809	0.108384	0.204263	0.391358	0.173768	0.481102	0.213138	0.127767	0.277634	0.257737	0.157033	0.209148	0.351133	0.516432	0.339274	0.242253	0.177072	0.561374	0.235205	0.233635	0.385354	0.451651	0.246062	0.713389	0.356468	0.0657799	0.170159	0.311041	0.0782957	0.136633	0.503651
AC150035.3	0	0	0	0	0.000261434	0	0	0		0	0.00204917	0	0	0	0	0	0.00058286	0	0	0	0	0	0.000245833	0	0	0	0	0	0.000545363	0	0	0	0.000566243	0	0	0.000850855	0	0	0.000686273	0	0	0	0	0	0
AC151836.1	0	0	0.0138944	0	0.00255884	0	0	0.00461042		0.00230996	0.0010093	0	0	0	0	0.000421831	0.00106818	0	0	0.000764852	0.00224063	0.00102386	0.000437324	0	0	0.000673132	0	0	0.000812042	0	0.00858634	0	0.00174767	0.00187897	0.0047206	0.00168319	0.000622223	0	0.000527319	0	0	0.022919	0	0	0
AC152827.1	0	0.0195422	0.00545956	0	0.00275062	0	0	0.0058419		0.00231765	0.00355146	0.00438846	0	0.0054416	0	0.00336662	0.00462418	0	0.00094142	0	0.00220296	0.00428754	0.00230003	0	0	0.00248681	0	0	0.00230026	0	0.00140145	0	0.00291614	0.0110596	0.00218186	0.00371537	0.00325053	0	0.00146071	0	0	0	0	0.00257114	0
AC153140.2	0.00256294	0	0	0.0527869	0.0050975	0	0	0.0045403		0.00269664	0	0.000886262	0	0.00202254	0	0.00257001	0.00615729	0.00234034	0	0.00127731	0.00237931	0.00289904	0.0024551	0	0	0.00268769	0	0	0.00295906	0	0.000546466	0	0.00295884	0.000178441	0	0.00430102	0.00551781	0	0.00300611	0	0	0	0	0.00271245	0
AC154438.1	0	0	0.0143744	0	0.00631187	0	0	0.00698671		0.00240311	0.00164981	0	0	0	0	0.000838534	0.0013505	0	0	0	0.000626047	0.00137494	0.00022759	0	0	0	0	0	0.00116594	0	0.000531338	0	0.000537118	0.00200324	0.00217991	0.00201042	0.00270104	0	0.000524979	0	0	0	0	0	0
AC154507.2	0	0	0	0	0	0	0	0		0	0	0	0	0	0	0	0	0	0	0	0.000627861	0	0	0	0	0	0	0	0	0	0	0	0.000773103	0	0	0.000518374	0	0	0.000976899	0	0	0	0	0	0
AC154509.1	0.0122182	0.0216064	0	0	0.00476147	0	0	0.00193568		0.00514465	0.00265461	0	0.149263	0.00136117	0	0.00265278	0.00213812	0	0.00241828	0.0132683	0	0.000992939	0.00241935	0	0	0.00210352	0	0.0139152	0.000218058	0	0.00132141	0	0	0.00258321	0.00325988	0	0	0.00591453	0	0	0	0	0	0.00195378	0
AC154546.2	0	0	0	0	0.000269817	0	0	0		0	0	0	0	0.00102672	0	0.000215609	0.000385061	0	0.00163784	0.00671231	0	0.000617544	0.00158812	0	0	0.00108119	0	0	9.3521e-05	0	0.00431339	0	0	0.00229305	0	0	0	0	0	0	0	0	0	0	0
AC154606.1	0	0	0	0	0	0	0	0		0.00192534	0.000869105	0	0	0.00294636	0	0.0186444	0.00846848	0	0	0	0.000803235	0.00590461	0.000574148	0	0.013454	0.000330853	0	0	0.00134931	0	0.00335513	0	0.00214625	0.00272325	0	0	0.00299626	0	0.00122927	0	0	0	0.0145898	0.00316879	0
AC154646.1	0	0	0	0	0	0	0	0		0	0	0	0	0	0	0	0	0	0	0	0.000540858	0	0	0	0	0	0	0	0	0	0	0	0.000250174	0	0	0.000960205	0	0	0.000693467	0	0	0	0	0	0
AC154691.1	0	0	0	0	0	0	0	0		0	0	0	0	0.000884386	0	0	0	0	0	0.00368936	0	0	0.000437912	0	0	0.00050524	0	0	0	0	0	0	0	0	0	0	0	0	0	0	0	0	0	0	0
AC154760.1	0.00772026	0	0.0392314	0	0.00498104	0	0	0.00797599		0.00491094	0.00218661	0.0137171	0	0.0252207	0	0.0105432	0.0187634	0.0065205	0.00982832	0.0109512	0.0144119	0.00800709	0.0129	0.0220323	0.0249391	0.0188158	0	0	0.0116608	0	0.00553867	0.107071	0.00945634	0.00821179	0.00581546	0.0118808	0.0111179	0	0.0122413	0	0.0250344	0.0258897	0.00708719	0.0188193	0
AC157554.3	0	0	0	0	0	0	0	0		0.000334923	0	0.00293843	0	0	0.030612	0.00012309	0	0	0.00133219	0	0.00276916	0.000315882	0	0	0	0	0.0865179	0	0	0	0	0	0.00111181	0	0	0.00176694	0	0	0.00267077	0	0	0	0	0	0
AC158554.1	0.00274789	0	0.0153067	0	0.00332486	0	0	0		0.00333446	0.000866949	0	0	0.00122421	0	0.00118104	0.00300586	0.00165551	0.00223726	0.0106174	0.00327391	0.0030025	0.00189119	0.020186	0.00765785	0.00282123	0	0	0.00179339	0.0101421	0.00327856	0	0.00837067	0.0017161	0	0.00809631	0.00243744	0	0.00594311	0	0	0	0	0	0
AC158605.1	0	0	0	0	0.00175875	0	0	0		0.00142291	0	0	0	0	0	0.000360305	0.000402016	0	0	0	0	0.000314893	0.000420841	0	0	0.000361282	0	0	0.000583405	0	0.000539613	0	0	0	0	0	0	0	0	0	0	0	0	0	0
AC159200.1	0	0	0	0	0.000225508	0	0	0.00207578		0	0	0	0	0	0	0	0.000236535	0.00320482	0	0	0	0	0.000330958	0	0	0.000176951	0	0	0	0	0	0	0.000694774	0	0	0.00153966	0	0	0.00060008	0	0	0	0	0	0
AC160336.1	0.442817	0.805019	0.462816	0.626323	0.706438	3.2462	0.703878	0.416517		1.11708	1.62778	0.691455	0.439961	0.863241	0.295541	1.56846	2.2509	0.916526	0.219047	1.30855	0.440546	0.602563	0.405447	0.65515	0.532609	0.860837	0.360578	0.532885	0.72833	0.678637	0.481578	1.17621	1.02632	0.301141	0.797769	0.648718	0.290827	1.73465	0.599738	0.681855	1.00169	1.15954	1.39557	2.07665	0.730435
AC160562.1	0.00257565	0	0	0.0749991	0.00491035	0	0	0		0.00483437	0	0	0	0.00533942	0	0.00130759	0.00119784	0	0.00424119	0	0	0.000438873	0.000398721	0	0	0.0010416	0	0	0.000593859	0	0.00176749	0	0	0.00394363	0.00291419	0	0	0	0	0	0	0	0	0	0
AC161165.2	0	0	0	0.0749991	0.00114554	0	0	0		0.0024261	0.00199581	0.0429295	0	0.00237623	0	0.00613261	0.00544422	0	0.00979371	0.0104381	0.00917578	0.00764096	0.0110717	0	0.00445828	0.00970627	0	0.0227397	0.00345611	0.00999763	0.00120838	0	0.00031605	0.00698679	0.0148395	0.00106665	0.0015677	0	0.00164935	0	0	0	0	0.00648768	0
AC161165.3	0	0	0	0	0	0	0	0		0.00176084	0.00395532	0	0	0.00150471	0	0.00247558	0.0015405	0	0.00208249	0	0.000785354	0.00256802	0.00141702	0	0	0.00100901	0	0	0.00125976	0	0.00197933	0	0.00153042	0.00273166	0.00103525	0.00119762	0.00184955	0	0.000574772	0	0	0	0	0.00160875	0
AC161165.6	0.0120304	0	0.0288952	0	0.0166445	0	0	0.0109353		0.0162779	0.0124459	0.0623595	0	0.0170746	0	0.0115838	0.0109509	0.0398711	0.026496	0.0345693	0.042991	0.0165352	0.0379913	0.0252471	0.0383722	0.039416	0	0.0191427	0.0281753	0.0661936	0.0224166	0	0.017565	0.0123216	0.0283471	0.0178067	0.016832	0.0250786	0.0189338	0.0170464	0	0.0407776	0	0.0258347	0
AC161376.2	0.0148987	0	0	0	0.0115523	0	0	0.0174296		0.0145717	0.00394999	0.00836484	0	0.0022795	0	0.00374785	0.00539072	0.00277602	0	0	0.000802158	0.00609534	0.00308939	0	0.00551578	0.00347294	0	0.00614628	0.00495525	0.0115003	0.00423853	0	0.00192958	0.00669439	0.00492485	0.00247351	0.000708315	0	0.00122038	0	0	0	0.00666406	0.00490147	0
AC161607.1	0	0	0.00812076	0	0.00350488	0	0	0.00287261		0.00136918	0.00466007	0.0151173	0	0.0152717	0	0.00137792	0.0052527	0.0111711	0.016167	0	0.0197927	0.00764924	0.00822662	0.142559	0.0154381	0.0123754	0	0.157126	0.0300678	0.0633725	0.0481215	0.0414912	0.0923641	0.0204738	0.00498838	0.0431845	0.0386555	0	0.0735062	0	0.0157642	0.0184016	0	0.0134693	0.221361
AC162302.1	0.0221683	0.0239798	0.0531312	0	0.0142874	0	0	0.0151295		0.0132757	0.00899772	0.00519784	0	0.0128573	0	0.0137467	0.0139706	0.0157981	0.0115965	0.0031629	0.0185125	0.0121366	0.0178919	0	0.0200268	0.0272338	0	0	0.019198	0.0304696	0.0183943	0.0736625	0.0229934	0.0196514	0.00787283	0.021248	0.01111	0.0281122	0.0232975	0	0.0174672	0.0170765	0.00522736	0.0226219	0
AC162693.1	0.000910162	0	0	0	0	0	0	0		0.000738041	0	0.00255493	0	0	0	0.000450896	0	0.00309105	0	0	0.00191228	0.00116214	0	0.0372992	0	0	0	0	0	0	0	0	0.000597535	0	0	0.000647501	0	0	0.000987128	0	0	0	0.00666406	0	0
AC163018.1	0.00200388	0	0.0116173	0	0.000946371	0	0	0.00460777		0.00319059	0	0	0	0.000769502	0	0.000140941	0	0.0021862	0	0	0	0	9.41572e-05	0	0	0	0	0	6.33212e-05	0	0	0	0.000206766	0.00211569	0.00188639	0.00121078	0.00140828	0	0.000177424	0	0	0	0	0	0
AC163032.1	0.00598994	0.0275956	0.0391408	0	0.00264817	0	0	0.0101875		0.0052582	0.00556203	0.00837206	0	0.00842234	0	0.00435826	0.00514575	0.00579553	0.0161355	0.0997798	0.00994916	0.00422968	0.00710824	0	0	0.00554962	0	0	0.00795369	0.0218346	0.0191698	0	0.0156427	0.00960648	0.00791415	0.0111362	0.0170653	0	0.0160393	0.03202	0	0.0365626	0	0.013312	0
AC163040.1	0.00493635	0	0	0	0.00339698	0	0	0.00812609		0.0020817	0.000866949	0.0063488	0	0.000653382	0	0.00412213	0.00454116	0	0.0038307	0	0.00137796	0.00163612	0.00319343	0.0374025	0	0.00209354	0	0	0.00317711	0	0.00438514	0	0.00461842	0.00171628	0.0100095	0.00387331	0.00115108	0	0.00325877	0	0	0.00900784	0	0.00416506	0
AC163352.1	0	0	0	0	0	0	0	0		0.00115563	0	0	0	0	0	0.000461934	0	0	0.00059649	0	0	0	0	0	0	0	0	0	0	0	0.000181453	0	0	0	0	0	0	0	0	0	0	0	0	0	0
AC163633.1	0.00557412	0.0253212	0.00701801	0	0.00629163	0	0	0.00550225		0.00979902	0.00545096	0.00289853	0	0.00391469	0	0.0102882	0.00982877	0.00598138	0.00472048	0.00746098	0.00969747	0.0142675	0.0119068	0	0	0.00744715	0	0	0.00738608	0.0105253	0.00103849	0	0.0103572	0.0154359	0.0194586	0.0122173	0.0270382	0	0.00897651	0	0	0.0101919	0.00797204	0.00825645	0
AC163633.2	0.0109797	0	0	0.0527869	0.000571303	0	0	0.0027867		0.00308167	0.00210894	0	0	0.000579295	0	0.00438882	0.00313483	0.00241972	0.00337978	0	0.00253034	0.0043994	0.0026951	0	0	0.00272254	0	0	0.00236996	0	0.00260199	0	0.00275014	0.00294049	0.00137167	0.00173286	0.00125081	0	0.00182237	0	0	0.0100664	0.00523738	0.0038707	0
AC163720.3	0.000873742	0.0477513	0.00965016	0	0.00377603	0	0	0		0.00812376	0.0261967	0.0018048	0	0.00763415	0	0.00846001	0.0098296	0	0.00664691	0.0221448	0.0121955	0.00816823	0.00720875	0	0.0186197	0.00713845	0	0	0.00833669	0.0101477	0.00771539	0	0.012887	0.00236514	0.00428288	0.00784839	0.00379285	0.0361808	0.0110014	0.0209223	0	0.0324002	0	0.0187806	0
AC164424.1	0.0232265	0.0592551	0.0677524	0.0690217	0.0212834	0	0	0.0436914		0.0257684	0.012352	0.00440838	0	0.0261857	0	0.0173233	0.0160537	0.0126585	0.019103	0.0350339	0.0266493	0.0166386	0.0280272	0.0220323	0	0.0276499	0	0.00786807	0.0291367	0	0.0176882	0.0455639	0.0262174	0.0212457	0.0260179	0.0243661	0.012681	0.083987	0.0248469	0.0463371	0	0.0199448	0.0135268	0.0179514	0
AC164883.2	0	0	0	0	0	0	0	0		0	0.000866949	0	0	0.000877455	0	0	0.000155591	0	0	0.018139	0	0	0.00102503	0	0	0.000721815	0	0	8.44175e-05	0	0	0	0	0	0	0	0	0	0	0	0	0	0	0	0
AC165271.1	0	0	0.0134318	0	0.0109951	0	0	0.018691		0.0064014	0.00210714	0	0	0.00452448	0	0.00100558	0.00147766	0	0.00174237	0	0.000451009	0.00192076	0.00143809	0	0	0.000132375	0	0	0.00113732	0.011968	0.00988838	0	0.00203261	0	0	0.00198027	0	0	0.00300585	0	0	0	0	0	0
AC165953.2	0.0426105	0.0775659	0.0896607	0	0.0470585	0	0	0.0454285		0.0721225	0.0612665	0.061365	0	0.0936908	0	0.0695031	0.0608131	0.0706268	0.0698247	0.184247	0.0981397	0.0555176	0.0899287	0.0970873	0.0935168	0.0791308	0.175304	0.0077647	0.0704583	0.128151	0.0947065	0.0692962	0.077003	0.0692043	0.107962	0.0856625	0.0568365	0.081748	0.0888031	0.1319	0.0450878	0.0507396	0.0400904	0.0746786	0
AC166344.1	0	0	0	0	0	0	0	0		0.00239202	0	0	0	0	0	0	0	0	0	0	0	0	0	0	0	0	0	0	0	0	0.000728319	0	0	0	0	0	0	0	0	0	0	0	0	0	0
AC167229.1	0.0411054	0	0.0414986	0.475121	0.15668	0	0	0.0309172		0.166996	0.0556725	0.00373063	0	0.012709	0	0.0045729	0.00151047	0	0.00518624	0	0.0014342	0.00302137	0.00155859	0	0	0.0025122	0	0.0133987	0.0112776	0	0.0420705	0.0250197	0.00753747	0.00285226	0	0.000723066	0.00891029	0	0.00233162	0	0	0	0.00666406	0.00438657	0
AC168977.1	0.00209841	0	0	0	0.000264147	0	0	0		0.00032596	0	0	0	0	0	0.000755895	0	0	0.000772007	0	0	0.00256531	0.000474817	0	0	0.000634995	0	0	0.00212915	0	0.00092177	0	0	0.00254487	0.00547221	0	0.00182205	0	0	0	0	0	0	0.000947677	0
AC168977.2	0	0	0	0	0.000904568	0	0	0		0.0029801	0.000974603	0.0019867	0	0.0030621	0	0.00165085	0.000744669	0.00163005	0	0	0.00186923	0.00374955	0.00209228	0	0	0.00170889	0	0	0.0026677	0	0.000697973	0	0.00102191	0.00115329	0	0.00325546	0.00510481	0.0179355	0.00214066	0	0	0	0	0.00396513	0
AC174678.1	0.0167273	0.0227791	0	0	0.0129847	0	0	0.00454655		0.00403596	0.00333642	0.00174763	0	0.00846522	0	0.0059692	0.0060324	0.00362842	0.00453389	0	0.0110171	0.00262187	0.0102396	0	0.0111475	0.00610515	0	0.0172449	0.00813602	0	0.00420029	0	0.0083651	0.0059642	0.0132038	0.00624951	0.00256609	0	0.00617418	0	0.0152835	0	0.0325384	0.0119719	0
Acaa1a	1.30096	1.114	1.12893	1.29273	1.2201	1.19769	2.81551	1.38118		1.16972	0.731571	1.1545	1.10139	0.953635	0.847726	0.836979	0.929679	0.821671	0.950611	0.911895	1.0301	1.00277	0.908759	0.99617	0.964151	0.821262	1.26528	0.808765	0.98036	1.1742	0.873026	1.03779	1.13285	0.89973	0.971227	1.19064	1.03117	1.28929	1.19648	0.52157	0.709436	0.649695	0.655608	0.69545	0.359066
Acaa1b	0	0	0.0119655	0	0.00972265	0	0	0.0186787		0.00427189	0.00326512	0	0	0.00464655	0	0.00722047	0.00654554	0.00400677	0.00491393	0	0.00625626	0.00519955	0.00629794	0.020186	0.00933363	0.003531	0	0	0.00552358	0	0.00527767	0.0389479	0.00944967	0.00450049	0.00432185	0.00179475	0.00926654	0	0.00810039	0	0	0	0	0.00680317	0.221361
Acaa2	5.67008	4.6619	8.24755	5.83402	3.39381	2.83199	7.03878	7.06127		2.11546	1.36156	1.68926	1.75036	1.11587	1.19519	0.831802	0.758227	0.837941	0.748529	0.712675	0.768596	1.14814	0.563073	1.62191	0.81477	0.536578	0.865309	1.13616	0.92297	1.85082	1.35707	1.17164	1.9802	0.916832	0.614813	1.28131	1.19365	0.337593	1.47952	0.420661	0.697934	0.488837	0.786242	0.439726	1.83195
Acaca	0.0680357	0.0843586	0.177076	0.0489541	0.0761127	0	0	0.0606336		0.0746073	0.116099	0.080703	0	0.11674	0.183773	0.0881707	0.102095	0.136775	0.0892569	0.245217	0.141294	0.0841501	0.121167	0.15793	0.0807728	0.142457	0.0632511	0.0384112	0.123321	0.144707	0.131525	0	0.133556	0.105909	0.186818	0.13482	0.122371	0.247481	0.145414	0.104649	0.0476439	0.180657	0.111058	0.138028	0
Acacb	0.00747385	0.0275956	0.0531391	0	0.0167207	0	0	0.00982392		0.00731887	0.0138888	0.0202913	0	0.0131862	0	0.00464644	0.00614021	0.0293742	0.0109891	0.0600969	0.0199871	0.00708634	0.0200398	0	0.0111475	0.013925	0	0	0.0307381	0.021587	0.0332512	0.0278914	0.0338656	0.020053	0.0151496	0.0291923	0.0151887	0.0482761	0.0303528	0	0.0340745	0	0.0131003	0.00970085	0
Acad10	0.00648915	0	0.0233165	0.0489541	0.00937527	0	0	0.0145686		0.0083363	0.0162307	0.0131055	0	0.00935129	0	0.00545009	0.00249395	0.00265093	0.0027106	0.00161163	0.00784824	0.00320315	0.00810025	0	0.023208	0.00659079	0	0	0.00844181	0.0286746	0.013093	0	0.0118062	0.00945161	0.01443	0.00921368	0.00765699	0.0500408	0.0132942	0	0.0161044	0	0	0.00275098	0
Acad11	0.0489526	0.0601404	0.0682371	0.139288	0.0626236	0	0	0.0831425		0.0383566	0.0271807	0.0525414	0	0.0477002	0.104552	0.0332024	0.0459779	0.0677522	0.0837259	0.0775289	0.0779023	0.0501859	0.0871255	0	0.0461508	0.0896685	0.0632511	0.106346	0.0919818	0.0780217	0.0490977	0.01469	0.0790752	0.104189	0.105981	0.0856007	0.096151	0.00591453	0.0869393	0.0230918	0.0894415	0.0409951	0.0251396	0.0692476	0.421165
Acad12	0.0634336	0	0.14518	0	0.0482406	0.153544	0	0.0504028		0.0161648	0.0139515	0.0525258	0	0.0387604	0	0.0140357	0.0117896	0.0204547	0.0328362	0.0349054	0.0426501	0.0203249	0.0373173	0.055116	0.0475951	0.0243411	0.221725	0	0.0402548	0.0307061	0.0378164	0	0.0458487	0.0233238	0.0304651	0.0384429	0.0346568	0	0.0465944	0.0209223	0.0157754	0	0.0125792	0.0125266	0
Acad8	0.243222	0.169118	0.264047	0.131461	0.203774	0.192086	0	0.239987		0.234599	0.162442	0.158861	0.149263	0.176417	0.279084	0.209135	0.211128	0.186522	0.215803	0.249283	0.168262	0.197644	0.177433	0.170325	0.168983	0.231807	0.46574	0.265805	0.219845	0.191491	0.272311	0.224412	0.239498	0.238483	0.227597	0.242157	0.229878	0.0755042	0.235025	0.299882	0.225344	0.266855	0.306083	0.232056	0.862718
Acad9	0.129814	0.0902472	0.0843384	0.0690217	0.0977011	0	0	0.10573		0.148315	0.0608671	0.225195	0.41555	0.0953652	0.166054	0.129639	0.108801	0.148772	0.136068	0.139162	0.0989711	0.118403	0.0914538	0	0.219313	0.118817	0.217837	0.136069	0.115179	0.135357	0.116978	0.165003	0.136452	0.149704	0.0889057	0.148793	0.164693	0.135945	0.131161	0.25437	0.262889	0.141444	0.173337	0.126187	0.194382
Acadl	0.76007	0.778082	0.636497	0.729785	0.779713	2.58389	1.40776	0.715562		0.706755	0.574911	0.84649	1.15195	0.567583	0.660055	0.556445	0.657106	0.476809	0.676259	0.530551	0.613606	0.77313	0.579481	0.784096	0.732211	0.585431	1.60497	0.952113	0.592392	0.760789	0.625134	0.557114	0.620844	0.601025	0.497622	0.636566	0.587769	0.606035	0.554773	0.837097	0.650483	0.860145	0.736993	0.808575	0.896289
Acadm	1.41836	0.819923	1.49623	0.812616	0.665478	0.499174	0	1.0001		0.572282	0.346339	0.552368	0.229825	0.465559	1.01716	0.458583	0.41459	0.556065	0.510162	0.620296	0.496698	0.57269	0.445481	0.606873	0.507713	0.557854	0.891851	0.854178	0.535196	0.956355	0.629824	0.325471	0.643473	0.654326	0.422606	0.611957	0.597339	0.167038	0.621415	0.447274	0.392079	0.491056	0.529331	0.512622	1.02315
Acads	0.546764	0.554098	0.303655	0.831997	0.494641	0.192086	0.703878	0.617431		0.48787	0.294623	0.357293	0.157581	0.393294	0.175023	0.402978	0.436616	0.320132	0.472264	0.382718	0.363356	0.610311	0.400255	0.468625	0.446971	0.345923	0.637019	0.306051	0.330289	0.342604	0.24491	0.28248	0.246016	0.264781	0.348935	0.285558	0.30522	0.43506	0.295005	0.277153	0.268033	0.189399	0.259015	0.252439	0
Acadsb	0.38997	0.311816	0.51712	0.16693	0.477572	0.153544	0	0.449846		0.322523	0.207657	0.57016	0.0525547	0.363046	0.500427	0.270355	0.289782	0.451501	0.425152	0.359285	0.361744	0.295984	0.339575	0.591542	0.360953	0.423677	0.318131	0.417839	0.547753	0.673125	0.567245	0.490459	0.645939	0.528075	0.47736	0.630613	0.556177	0.41078	0.63697	0.331833	0.21477	0.30652	0.248982	0.248786	0.615548
Acadvl	0.867596	0.790294	0.712133	0.928771	0.717195	0.192086	2.11164	0.714405		0.84759	0.714341	0.985765	0.798771	0.644271	1.09576	0.672104	0.587213	0.711139	0.822352	1.37285	0.596106	0.878117	0.585277	0.575386	0.738339	0.846835	0.995485	1.1292	0.778493	1.15749	0.817532	0.852919	0.903453	1.05499	0.766946	0.910823	0.996811	0.561124	0.815948	0.450957	0.609842	0.660911	0.564769	0.542676	1.6213
Acan	0	0	0	0	0.00685791	0	0	0.00580838		0.000123709	0.0054781	0	0	0.00143666	0	0.00436341	0.0570651	0	0.0206624	0.240953	0.014633	0.0041754	0.142503	0	0	0.0745253	0	0.0139152	0.00968422	0	0.000251059	0.0692962	0.00124556	0.00184425	0.0204256	0.000469984	0	0.0179355	0.000142511	0	0.011108	0.0215028	0	0.0357034	0
Acap1	0.0112006	0	0.00374832	0	0.00250982	0	0	0.00241015		0.0117922	0.00103043	0.00398664	0	0.00252907	0	0.00150486	0.000986262	0	0.00134984	0.00132136	0.00156129	0.00117492	0.00108521	0	0	0.00103834	0	0	8.50408e-05	0	0	0	0	0	0	0.000238182	0	0	0.0004635	0	0	0	0	0	0
Acap2	0.324287	0.612267	0.449622	0.174595	0.330977	0.314347	0	0.38292		0.298539	0.248704	0.543446	0.379549	0.3877	0.517294	0.243264	0.288083	0.533026	0.252534	0.229177	0.363254	0.178702	0.253489	0.655166	0.153783	0.29136	0.411208	0.257735	0.523984	0.448801	0.376057	0.408424	0.544796	0.357171	0.474384	0.51759	0.418539	0.473416	0.610684	0.532453	0.331802	0.550214	0.414947	0.383595	0
Acap3	0.144822	0.0955869	0.233516	0.0749991	0.146788	0.153544	0	0.167049		0.107995	0.0748624	0.252841	0.0644695	0.162876	0.0651067	0.12421	0.149323	0.329672	0.125464	0.26085	0.157022	0.120784	0.144289	0.283564	0.0970246	0.145372	0.199514	0.0447069	0.216829	0.307662	0.154404	0.203536	0.214636	0.229712	0.208013	0.29595	0.276063	0.332436	0.299891	0.375141	0.12231	0.194493	0.135511	0.154462	0.194382
Acat1	1.10646	1.03194	0.893635	0.932857	0.959723	1.12787	1.40776	0.863635		1.19671	0.739381	0.900064	1.39773	0.8867	0.847791	1.27474	1.03724	0.725255	0.980081	0.838853	0.724399	1.19276	0.642792	0.734116	1.33813	0.960844	1.28021	2.1397	1.06346	1.20403	1.34049	1.32113	1.24359	1.35996	0.786734	1.04004	1.437	0.826089	1.02026	2.6235	1.53177	1.42911	2.02143	1.32749	2.17329
Acat2	0.285541	0.263403	0.311553	0.268279	0.162033	0	0	0.13059		0.227499	0.179233	0.0837347	0.387324	0.0751618	0.063044	0.200769	0.161364	0.0697546	0.101089	0.170457	0.0625047	0.122558	0.0693626	0	0.114681	0.122639	0	0.0147553	0.0640799	0.111363	0.109159	0.140818	0.0899255	0.0852405	0.0657255	0.0647059	0.0946198	0.0981584	0.0602881	0.114519	0	0.0868372	0.105182	0.103298	0
Acat3	0.0342522	0.0262885	0.0630729	0.0606767	0.0171454	0	0	0.0249198		0.0099211	0	0.00215262	0	0.00304478	0.118696	0.00456598	0.00268224	0.00124429	0.00662411	0.00753993	0.00403427	0.00479831	0.00433217	0	0.0224663	0.00636277	0	0	0.00225554	0	0.00531958	0	0.00146805	0.00216372	0.00183228	0.000203336	0.00453945	0	0.001057	0	0	0.017409	0.0118422	0.000567614	0
Acbd3	0.424455	0.791658	0.194875	0.281033	0.393093	0	0.703878	0.405839		0.453894	0.486335	0.717361	0.507207	0.517137	0.314762	0.648585	0.617003	0.601165	0.463334	0.314723	0.516837	0.555406	0.484267	0.551013	0.463513	0.441352	0.635953	0.429058	0.414503	0.270104	0.32839	0.0868789	0.278706	0.393085	0.446641	0.337152	0.423615	0.401391	0.388522	0.493008	0.484088	0.404365	0.447938	0.506628	0.583147
Acbd4	0.160414	0.121536	0.476031	0.152774	0.205927	0.192086	0	0.226015		0.0928857	0.146943	0.265684	0.0722439	0.201164	0.450192	0.0806617	0.156595	0.211117	0.246835	0.215963	0.215712	0.1261	0.162497	0.285325	0.24018	0.157427	0.594908	0.186848	0.29182	0.272248	0.352068	0.0848201	0.457508	0.202553	0.22394	0.372896	0.282428	0.151044	0.396334	0.0654839	0.0358879	0.198308	0.0678183	0.0920019	0.359066
Acbd5	0.439398	0.327392	0.260599	0.234355	0.32764	0.153544	0	0.394041		0.311019	0.225593	0.307276	0.117024	0.252405	0.20418	0.251295	0.222611	0.340885	0.28017	0.384282	0.280477	0.223528	0.267158	0.301903	0.203589	0.326606	0.210071	0.104529	0.300135	0.191566	0.245465	0.491089	0.264231	0.353553	0.412791	0.316369	0.299542	0.140778	0.305127	0.418333	0.18663	0.232843	0.315043	0.263777	0.194382
Acbd6	0.596893	0.648174	0.719661	0.403268	0.725295	0.499174	0.703878	0.755892		0.562011	0.515162	0.620423	0.386632	0.608136	0.691348	0.481157	0.690746	0.542802	0.605261	0.442181	0.704664	0.63205	0.717397	0.76218	0.516068	0.536279	0.615451	0.350985	0.623372	0.584296	0.475037	0.54401	0.608946	0.436195	0.608677	0.609017	0.511404	0.451435	0.622222	0.584485	0.461947	0.584332	0.477923	0.512625	0.669506
Acbd7	0	0.0216064	0	0	0.00158495	0	0	0.00310075		0.00291925	0.00162851	0	0	0	0	0.00104078	0.000562153	0	0.00192034	0	0.00262576	0.0004974	0.00126955	0	0	0.00164266	0	0	0.0020723	0	0.00419584	0	0.00115613	0	0	0.000994898	0.00184422	0	0.000523765	0	0	0	0	0.00147216	0
Accs	0.0768539	0.0683281	0.0587208	0.0489541	0.0676824	0.34563	0	0.0465608		0.0570633	0.0305006	0.0580004	0.254289	0.0727066	0.118696	0.0313837	0.0490422	0.0175839	0.0768862	0.127286	0.0705236	0.0456065	0.0826301	0.064011	0.0315717	0.0832944	0.136166	0	0.0618736	0.0435519	0.047795	0	0.0554781	0.0523638	0.0496307	0.04841	0.0528535	0.0258582	0.0502306	0.0391793	0.021907	0.0222714	0.0571759	0.0664707	0
Accsl	0	0	0	0	0	0	0	0		0	0	0	0	0	0	0	0.000942063	0	0	0	0	0	0.000585877	0	0	0.000740485	0	0	0.00022759	0	0	0	0	0	0	0	0	0	0	0	0	0	0	0.000705685	0
Acd	0.246408	0.277481	0.267157	0.266237	0.340933	0.192086	0	0.29968		0.308969	0.233221	0.333891	0	0.289397	0.359113	0.283926	0.329986	0.237791	0.354372	0.233717	0.397746	0.328753	0.353758	0.273988	0.278207	0.382039	0.274518	0.127008	0.30754	0.238689	0.346244	0.200806	0.306322	0.31594	0.350689	0.314184	0.307687	0.544704	0.32742	0.343228	0.164819	0.350557	0.346304	0.357493	0.194382
Ace	0.100356	0.744639	0.297699	0.316722	0.242371	0.959805	0	0.236142		0.0696611	0.316339	0.780648	0.197042	0.984979	2.64574	0.123576	0.480456	1.77729	0.883943	1.33275	1.83949	0.176388	1.00064	4.35329	0.360944	1.12891	2.37272	0.715984	2.66047	3.30109	1.26284	2.04986	2.62306	1.46863	2.3649	2.91527	2.23102	3.51037	3.49737	1.78312	1.83906	1.48623	0.744334	1.32184	1.42818
Ace2	0.0149278	0.0348595	0.0231742	0	0.00409545	0	0	0.0176373		0.00334812	0.011004	0.00918064	0	0	0	0.000622932	0.00149687	0.00325641	0.00353303	0	0.00342456	0.000565275	0.00226236	0	0	0.0011627	0	0	0.00223644	0	0	0	0.0023168	0.00159921	0	0.00171908	0.00139108	0	0.00925107	0	0	0	0	0.000978807	0
Acer2	0.00219266	0.0215692	0.0153511	0	0.00563748	0	0	0.018089		0.00800248	0.0966088	0.140709	0	0.00496884	0	0.00980746	0.00928101	0.00680073	0.00475521	0.0169245	0.0103439	0.00856105	0.00677077	0	0	0.00710401	0.156779	0.065261	0.0227326	0.0125828	0.0387461	0	0.0314629	0.0082003	0	0.0128762	0.0246634	0	0.0187384	0	0.0152835	0.0239568	0	0.0116431	0
Acer3	0.25471	0.169097	0.100286	0.283075	0.143411	0	0	0.195921		0.237093	0.14066	0.126599	0.201817	0.148887	0.282281	0.208813	0.172335	0.125186	0.182105	0.135526	0.114905	0.147849	0.135208	0.130123	0.218381	0.189017	0.413628	0.0905416	0.151662	0.0695049	0.160738	0.124098	0.09791	0.204643	0.197312	0.138084	0.161449	0.350361	0.103954	0.137338	0.10922	0.170914	0.298059	0.179357	0.221361
Ache	0	0	0	0	0	0	0	0		0.00109205	0	0.0119858	0	0	0	0.000249042	0	0	0	0	0.00189717	0.000505343	0.00053512	0	0	7.5018e-05	0.0954153	0	0.000727585	0	0.000674447	0	0.00404399	0	0	0.00268386	0	0	0.00521508	0	0	0.0324002	0	0	0
Acin1	1.03434	0.567317	1.08078	0.28056	0.799823	2.73743	2.11164	0.852417		1.05183	0.623505	0.910194	0.976796	0.646697	0.584056	0.989428	0.89985	0.793509	0.695572	0.786956	0.693305	0.813243	0.626019	0.580117	0.63717	0.747105	0.807041	0.894989	0.735134	0.660918	0.588367	0.493171	0.708939	0.689748	0.69707	0.744393	0.710346	0.840558	0.782536	1.06797	0.940848	0.740396	1.01482	0.943977	0.725013
Ackr1	0.00613412	0	0	0	0.0170657	0	0	0.00173391		0.00821903	0.00701171	0.0552952	0	0.056052	0	0.00553882	0.00991972	0.0361399	0	0	0.00716992	0.00139811	0.00195732	0	0	0.00041314	0	0	0.00963531	0.0294815	0.0054851	0	0.0054321	0.0455009	0.0789709	0.0418014	0.0235197	0.12291	0.0128815	0	0	0.0245981	0.0136571	0.00249403	0
Ackr2	0	0	0	0	0.00173223	0	0	0		0.000730665	0.0117736	0.0734476	0	0.015298	0	0.00209784	0.00474798	0.146995	0.00188466	0.00106178	0.0119375	0	0.00125062	0	0	0.00119857	0	0	0.0413618	0.0561638	0.0132754	0	0.0258569	0.160076	0.261974	0.276348	0.0465625	0.0906187	0.0470025	0	0.0404981	0.0745969	0.0136571	0.00580953	0.359066
Ackr3	1.1935	0.954018	1.02861	0.233833	0.786001	0.307088	0	0.860882		0.530676	0.73414	1.70604	0.958897	0.694209	2.72341	0.598232	0.275254	2.09387	0.124141	0.0443539	0.505695	0.0807926	0.0539091	0.596726	0.260473	0.0632132	1.39523	0.485672	1.543	2.63714	1.65857	0.275205	1.55714	4.8943	3.2623	5.01016	2.56543	1.62764	2.59627	0.220845	0.0860101	1.7827	1.27716	0.177472	1.47556
Ackr4	0.0318606	0.324563	0.037239	0	0.0678557	0	0	0.0529756		0.0334864	0.0904219	0.172049	0	0.0605887	0	0.0525367	0.0990091	0.444021	0.271277	0.148044	0.474552	0.0424778	0.26274	0.567709	0.0750594	0.317748	0.883139	0.331101	1.15774	0.615442	0.266328	0.115534	0.667057	1.64333	1.57978	1.07146	1.37386	1.4481	0.840809	0.208008	0.436715	0.263489	0.367014	0.316441	0
Acly	0.416332	0.280055	0.214529	0.109631	0.367237	0	0	0.325945		0.505377	0.343658	0.573311	0.540175	1.05782	0.42649	0.757398	0.483993	0.488438	0.354783	0.392457	0.283044	0.354431	0.291549	0.250219	0.348901	0.316153	0	0.698297	0.376279	0.503332	0.336147	0.622442	0.428725	0.490295	0.382988	0.49236	0.509395	0.319961	0.428902	0.349815	0.248257	0.226211	0.299609	0.309782	0.862718
Aco1	0.239206	0.21992	0.111372	0.264474	0.196893	0.467891	0	0.193458		0.245843	0.137008	0.130814	0.0644695	0.231623	0	0.234772	0.207071	0.241053	0.18004	0.291016	0.136278	0.195981	0.151124	0.359928	0.265764	0.185391	0.223389	0.0785988	0.212404	0.26124	0.157312	0.321141	0.223941	0.224966	0.176792	0.204941	0.243827	0.0975532	0.22907	0.2425	0.15257	0.215378	0.0974479	0.166205	0
Aco2	0.877525	0.731106	0.662774	1.2263	0.629636	0	0.703878	0.790595		0.739179	0.655707	0.819506	0.802322	0.471257	1.12846	0.65674	0.652273	0.51846	0.57112	0.742776	0.484622	0.732574	0.488735	0.680838	0.691406	0.55973	0.742196	0.712177	0.548128	0.870388	0.460418	0.960107	0.593288	0.635133	0.567102	0.674712	0.662876	0.469207	0.615485	0.720547	0.714833	0.646749	0.689465	0.701786	1.49028
Acot1	0.307827	0.326773	0.273577	1.05212	0.371497	0	0	0.312199		0.443199	0.154017	0.128849	0.266287	0.115132	0	0.100277	0.0906711	0.10406	0.11359	0.0456148	0.128977	0.13209	0.112991	0.12055	0.163924	0.137726	0.0945108	0.0601844	0.142919	0.289913	0.270692	0.0789606	0.261405	0.0979983	0.0798703	0.14681	0.122124	0.0476332	0.118676	0.101329	0.0787918	0.106352	0.0920984	0.0857991	0
Acot10	0.0152328	0	0	0	0.0255361	0	0	0.0118994		0.0105388	0.00905805	0.0116198	0	0.0100023	0	0.0176639	0.0115913	0.00705879	0.0147403	0.0107886	0.00468588	0.0128398	0.0128979	0	0	0.0123338	0.219814	0	0.0123182	0.00910701	0.00690991	0	0.00566183	0.0126637	0.0143894	0.0120748	0.0189058	0.0106936	0.00799318	0.024395	0	0	0	0.00910606	0
Acot11	0.0330745	0.0489488	0.0262666	0	0.0158539	0	0	0.0100212		0.0121055	0.0245194	0.0249398	0	0.0177295	0	0.0323087	0.0402427	0.0224323	0.0461216	0.0667663	0.0536745	0.0286144	0.051718	0.0310477	0.0395291	0.0471107	0	0.0358012	0.0345499	0.0293725	0.0541371	0.0389479	0.0399288	0.0299987	0.0408046	0.032993	0.0179715	0	0.0252634	0.0878056	0.0774069	0.055075	0.0268027	0.0343592	0
Acot12	0	0	0	0	0.000574461	0	0	0		0.00130804	0	0	0	0.00149798	0	0.000149134	0.000206371	0	0	0	0	0	0.000482916	0	0	0.000890409	0	0	9.49134e-05	0	0	0	0	0	0	0	0	0	0	0	0	0	0	0.00050916	0
Acot13	0.447769	0.520434	0.549617	0.474202	0.438183	0	0	0.484814		0.470258	0.30559	0.618295	0.611376	0.510093	1.08931	0.536839	0.452187	0.608496	0.674114	0.344354	0.577746	0.675222	0.530859	0.819356	0.790157	0.622782	0.769118	0.933028	0.519234	0.919121	0.783699	0.445778	0.591589	0.674893	0.418438	0.602922	0.566895	0.491231	0.574032	0.323716	0.292796	0.341175	0.407196	0.368652	2.69971
Acot2	0.125234	0.0870934	0.299565	0.24969	0.109425	0	0	0.125263		0.157621	0.0643765	0.326152	0	0.11416	0.200453	0.105013	0.078544	0.289991	0.0859386	0.134483	0.128769	0.0595151	0.0903385	0.0310477	0.0626134	0.137756	0.285745	0.0507954	0.118283	0.138682	0.154405	0.0679393	0.2018	0.158477	0.131827	0.199068	0.146936	0.0701807	0.174229	0.0793549	0.0400634	0.0314782	0.0652254	0.117172	0.503651
Acot3	0.00459876	0	0	0	0.00874962	0	0	0.00163738		0.00838148	0.00120402	0	0	0	0	0.00185663	0.000420937	0	0	0	0	0	0.000278382	0	0	0.00014977	0	0	0.000216027	0	0.000251059	0	0	0.000368966	0	0	0	0	0.000136744	0	0	0	0	0.000361687	0.221361
Acot4	0.0304159	0.0919123	0.012367	0	0.0320467	0	0	0.0145149		0.0388402	0.0122757	0.0465766	0	0.0099747	0	0.0107441	0.00577245	0	0.00124795	0.00571388	0.00167069	0.00341055	0.000950974	0	0.01155	0.00161555	0	0	0.00140972	0.0115003	0.00214339	0	0.00126448	0.00539497	0.0033993	0.00165093	0.00161708	0	0.000123042	0	0	0	0.00708719	0	0
Acot5	0.0208628	0.0196919	0	0.0489541	0.00482665	0	0	0.041542		0.00662163	0	0	0	0	0	0.000700875	0	0	0	0	0	0.00161454	3.45232e-05	0	0.00969476	0.000144747	0	0	0.000282048	0	0	0	0	0.000671116	0	0	0	0	0	0	0	0	0	0	0
Acot6	0.0387076	0.0441323	0.0153458	0	0.0319019	0	0	0.0408628		0.0176684	0.0101356	0.0353985	0	0.0376157	0	0.0162437	0.0207125	0.0160751	0.0327745	0.0302743	0.0210406	0.0142758	0.023606	0	0.0185656	0.0221572	0	0	0.0366736	0.0482338	0.029728	0	0.0491674	0.0273114	0.0198127	0.0391842	0.0344047	0.0661707	0.0508345	0.0251487	0	0	0.00416782	0.0104009	0
Acot7	0.913096	0.823275	0.382523	1.34756	0.63495	0	0.703878	0.740594		0.881399	0.745914	0.673622	0.572496	0.413665	0.121043	0.946264	0.953503	0.582419	0.586214	0.498986	0.460072	0.834063	0.610779	0.338868	0.495056	0.556625	0.283065	0.889517	0.525605	0.250009	0.345203	0.280908	0.2182	0.518572	0.683473	0.332839	0.434436	0.523884	0.282356	1.37072	1.70843	0.934013	1.11445	1.14019	1.73862
Acot8	0.177592	0.295463	0.1922	0.335231	0.179402	0	0	0.206421		0.16018	0.104079	0.168124	0.105109	0.113508	0.140807	0.127234	0.146937	0.107134	0.115692	0.107171	0.116466	0.11738	0.106529	0.211918	0.07472	0.0851743	0.0632511	0.121766	0.138441	0.163793	0.10514	0.137236	0.14041	0.117431	0.0876152	0.155709	0.150769	0.00591453	0.152867	0.116931	0.171247	0.179957	0.0867117	0.100794	0.226783
Acot9	1.04463	0.869703	0.617276	0.979211	0.612902	0.506433	1.40776	0.624511		0.887922	0.636575	0.961069	0.706165	0.485801	0.381327	0.946677	0.695857	0.656151	0.88987	0.604404	0.474722	0.875816	0.532003	0.56952	0.757319	0.819265	0.802118	0.78918	0.726828	0.605078	0.737245	0.589182	0.611681	1.07178	0.688216	0.769776	1.03885	0.789786	0.62677	1.69298	0.812752	0.627257	1.30985	0.981857	0.503651
Acox1	0.280205	0.242052	0.397988	0.407956	0.277856	0	0	0.25455		0.243361	0.182391	0.256652	0.136713	0.204289	0.0380987	0.108579	0.107969	0.163624	0.100307	0.228654	0.146037	0.10161	0.122943	0.160825	0.051331	0.109137	0	0.128363	0.11545	0.171782	0.140632	0.0864702	0.115943	0.1092	0.119737	0.116218	0.116535	0.506438	0.127622	0.0948106	0.0653367	0.0744523	0.0567416	0.0835583	0.503651
Acox2	0	0	0	0	0	0	0	0		0	0	0	0	0	0	0	0	0	0	0	0	0	0.00116913	0	0	0.00176441	0	0	0.000139892	0	0	0	0	0	0	0	0	0	0	0	0	0	0	0.00163409	0
Acox3	0.0368497	0.0907801	0.048439	0	0.0460853	0.153544	0	0.062729		0.0338979	0.0197364	0.0709693	0	0.112168	0	0.0341609	0.0518704	0.0548397	0.0462618	0.148948	0.0730983	0.0459434	0.0726749	0.055116	0.0441104	0.0668477	0.0632511	0.015872	0.0806336	0.14727	0.0720587	0.0550553	0.100854	0.0566886	0.0899777	0.105862	0.071191	0.0159207	0.109102	0	0.0355445	0.0312312	0.0353463	0.0477042	0
Acoxl	0	0	0	0	0.00394096	0	0	0		0	0	0	0	0.00265726	0	0	0.000426228	0	0	0.0292483	0	0	0.000103679	0	0	0.000297036	0	0	0.000281004	0	0	0	0	0	0	0	0	0	0	0	0	0	0	0	0
Acp1	1.54693	0.973845	1.18528	2.30125	1.1769	0.537716	0	0.919371		1.94667	1.0138	1.5473	1.34939	0.946196	0.932761	1.86938	1.40777	1.01403	1.08902	0.714654	0.913806	1.45879	0.914218	1.11203	1.30153	1.30026	1.57031	1.76738	1.21723	1.19927	1.51969	0.914657	1.16087	1.66288	1.10189	1.22495	1.4948	1.03651	1.06947	2.91549	2.21866	1.7429	2.55273	2.03159	1.16628
Acp2	0.136724	0.175295	0.184986	0	0.160941	0.506433	0	0.149968		0.131755	0.167208	0.218626	0.0644695	0.227485	0.147634	0.126917	0.142815	0.242495	0.219913	0.207255	0.254183	0.159912	0.245585	0.290863	0.267707	0.230222	0.0659309	0.119382	0.236387	0.201159	0.225159	0.0938002	0.211978	0.204194	0.280774	0.242081	0.225625	0.294531	0.271298	0.223437	0.213374	0.203829	0.126101	0.155196	0
Acp5	1.43336	1.49663	0.614994	1.10742	1.06412	0.192086	2.11164	1.44536		0.96262	0.541747	0.218559	0.672608	0.538399	0.084104	0.474178	0.349165	0.139774	0.343725	0.357473	0.273899	0.393344	0.271221	0.119486	0.403898	0.239634	0	0.153453	0.122808	0.0724999	0.45317	0.257363	0.0622877	0.141804	0.119496	0.0420812	0.118271	0.0397702	0.0318693	0.0394306	0.120852	0.125943	0.0595111	0.110697	0
Acp6	0.090452	0.0477513	0.215134	0.109631	0.071102	0	0	0.109624		0.105104	0.044386	0.0812657	0.149263	0.0392064	0.0614447	0.0853386	0.117241	0.0605781	0.0880525	0.0861002	0.0648225	0.0519438	0.0650647	0.0778579	0.0782296	0.0915061	0	0.0155096	0.0797743	0.0787643	0.11198	0	0.0975425	0.0817858	0.0531488	0.0625916	0.0744819	0.0218347	0.0793308	1.00257	1.09301	0.665983	0.422452	0.68359	0.421165
Acpp	0	0	0	0	0	0	0	0		0.000894991	0	0	0	0.00142815	0	0.00115307	0	0	0	0	0	0.000524517	0.000584497	0	0	0.000300158	0	0	0.000203847	0	0	0	0	0	0	0	0	0	0	0	0	0	0.00592108	0	0
Acrbp	0.0240699	0.0275956	0.0450742	0	0.0254411	0	0	0.0135891		0.0142232	0.0129848	0.0254895	0	0.0245108	0.0651067	0.00719525	0.0107243	0.0215666	0.0121878	0.073729	0.0298285	0.019709	0.0247254	0.0231813	0	0.016148	0	0	0.0248202	0.0280927	0.0335134	0.0921752	0.0271905	0.0138418	0.0209917	0.0248933	0.01894	0.0215974	0.0242338	0	0.0212168	0.0336628	0.00629843	0.0175821	0.221361
Acsbg1	0.00763839	0	0	0	0	0	0	0		0.0022319	0	0.162035	0	0.00111968	0	0.0047412	0.00253233	0	0	0	0	0.000745401	0.00048044	0	0	0.000726738	0	0.00614628	0.00139254	0	0.01139	0	0.0132066	0	0	0.00263524	0	0	0	0	0	0	0	0	0
Acsf2	0.0404897	0.0627178	0.0771644	0	0.0938131	0	0	0.1034		0.0690324	0.0594293	0.0413456	0.149263	0.0799625	0	0.032142	0.0562778	0.0384081	0.0545944	0.102548	0.0883137	0.0482182	0.0786087	0.0670902	0.0371242	0.072882	0.249635	0.0150141	0.0847964	0.0752534	0.0728706	0.0708015	0.109636	0.0561917	0.0638835	0.0651993	0.0575766	0.0196789	0.08828	0.0710682	0.140274	0.0164236	0.0142673	0.0604326	0
Acsf3	0.056497	0.127254	0.037545	0	0.0691462	0	0	0.0660235		0.0448088	0.0374696	0.0618289	0	0.0343789	0.0651067	0.0337351	0.0440736	0.0803273	0.0544453	0.0494666	0.0597649	0.0489783	0.0592269	0.0688729	0.01155	0.0379611	0	0.00786807	0.038963	0.0328393	0.0204187	0.055437	0.033714	0.0326033	0.0347929	0.0358752	0.0254952	0.0885414	0.0411659	0.0265066	0.0495507	0.0450244	0.015166	0.0333218	0
Acsl1	0.025524	0.0404888	0.062614	0.0624395	0.0318112	0	0	0.021894		0.0471189	0.0493954	0.134597	0	0.0302566	0	0.0325217	0.0324746	0.0710342	0.0294119	0.0543924	0.0543897	0.0364747	0.0512032	0.162161	0.0251822	0.0557595	0	0.0592847	0.0550261	0.139961	0.0499683	0.0503239	0.073525	0.0576722	0.0561559	0.0649069	0.090365	0	0.0593384	0.0215731	0.0610815	0.0329853	0.041806	0.047962	0.58585
Acsl3	0.112348	0.0866313	0.0683837	0.117976	0.0831609	0	0	0.0595379		0.0881061	0.149079	0.09647	0.522219	0.127894	0.0324005	0.187714	0.239259	0.0918718	0.21933	0.335537	0.132497	0.349014	0.245808	0.202978	0.268583	0.185057	0	0.077969	0.124029	0.108004	0.206468	0.0616017	0.136239	0.11042	0.117226	0.138047	0.108844	0.0459176	0.11294	0.209912	0.145286	0.147644	0.174645	0.204456	0
Acsl4	0.539524	0.6557	0.591202	0.562264	0.670612	0	1.40776	0.521986		0.835046	0.341987	0.319848	0.201183	0.34565	0.193159	0.365789	0.221448	0.138392	0.109624	0.193767	0.122081	0.145348	0.127771	0.0378212	0.177073	0.121878	0.280865	0.123897	0.155541	0.0717899	0.150729	0.161684	0.138356	0.144616	0.187095	0.152957	0.134462	0.376862	0.140224	0.195242	0.0857141	0.196655	0.281657	0.177276	0.730435
Acsl5	0.702978	0.793948	0.57398	0.469599	0.510225	0.153544	0	0.6041		0.513591	0.401461	0.518398	0.222051	0.379524	0.314839	0.447152	0.491358	0.519172	0.348465	0.346273	0.355452	0.413639	0.359652	0.449484	0.399295	0.379865	0.761282	0.301802	0.50334	0.495098	0.39727	0.591489	0.522682	0.484739	0.513192	0.529696	0.561759	0.473618	0.493407	0.748822	0.730388	0.596786	0.48634	0.547449	0.388765
Acsl6	0	0	0	0	0	0	0	0		0.000965836	0	0	0	0	0	0.000299156	0	0	0.000810054	0	0	0	0	0	0	0	0	0	0	0	0	0	0.00166919	0	0	0	0	0	0.00012154	0	0	0	0	0	0
Acsm3	0	0	0	0	0.0112603	0	0	0.0114058		0	0.00296997	0	0	0	0	0	0	0	0	0	0	0	0	0	0	0	0	0	0.000165391	0	0	0	0	0	0	0	0	0	0	0	0	0	0	0	0
Acsm5	0	0	0	0	0	0	0	0		0	0	0	0	0	0	0	0	0	0	0	0	0	0	0	0	0	0	0	0	0	0	0	0	0	0	0.000194518	0	0	0.000330471	0	0	0	0	0	0
Acss1	0.00211447	0	0.00915399	0	0	0	0	0		0.00150748	0	0.0102472	0	0.00177655	0	0.00207136	0.000475887	0.0128003	0.00284129	0.000734051	0.00660528	0.000611517	0.00260606	0	0	0.00417979	0	0	0.00269898	0.0184518	0.0013898	0	0.00321846	0.00084391	0	0.00816155	0.00827925	0	0.00530912	0	0	0.017409	0	0.00164193	0
Acss2	0.0438659	0.0476417	0.0865006	0	0.0297585	0	0	0.0555994		0.0414666	0.0347821	0.0752551	0	0.0700132	0.184671	0.0551977	0.0434659	0.081337	0.0622907	0.0515597	0.0594448	0.0560799	0.041175	0.243714	0.0715221	0.0477683	0.268245	0.0780058	0.0823629	0.145082	0.0777021	0.0790514	0.146795	0.0964967	0.0613644	0.165663	0.0875287	0.0243202	0.153629	0.0661507	0.0355326	0.144942	0.109258	0.0414343	0
Acss3	0.00214862	0	0.0472099	0	0.010987	0	0	0.0100995		0.00532934	0.00304833	0.0314406	0	0.0777471	0.0592831	0.00237486	0.0019353	0.00613557	0.000583031	0	0.00556217	0.00287932	0.00307173	0.217016	0	0.00394944	0	0.0358012	0.0368068	0.0525788	0.0595685	0.0250197	0.0899855	0.00705766	0.00293673	0.0173097	0.0243406	0	0.0407103	0	0	0.0140254	0	0.004304	0
Acta1	0.0148667	0	0.0211258	0.123116	0.00734502	0	0	0.00238553		0.0277396	0.0172868	0.0592618	0	0.00307337	0	0.0250334	0.00899709	0.0373598	0.0404225	0.030674	0.0287302	0.0676804	0.0120715	0.0953461	0.036142	0.0114718	0	0.125755	0.0141485	0.400964	0.0118979	0	0.0136633	0.0123961	0.00954003	0.0192503	0.0281868	0.418375	0.0227996	0.0225665	0.0272124	0.0568229	0.021295	0.0046846	1.58206
Acta2	3.22519	2.96	0.312403	2.72429	3.95581	1.88537	2.81551	2.17567		5.60812	5.25385	1.81919	11.7334	4.35544	0.0920567	22.3742	31.4312	9.25257	12.268	14.8003	2.83792	34.9988	16.6262	0.487757	23.7585	12.2058	0.570101	10.2976	3.07186	0.111021	3.25397	5.63051	0.293782	3.69976	3.71021	0.449268	3.38828	3.99598	0.233184	5.56329	13.8327	6.1837	12.2161	11.3039	0.226783
Actb	34.5317	32.9312	32.6359	41.0567	27.9614	37.9409	51.3831	23.1259		51.5453	27.4305	37.6473	37.7344	31.5999	34.7472	71.9818	57.7713	49.5165	44.5649	26.5444	32.1317	61.2467	40.2285	17.9535	60.1979	50.1727	38.9677	62.9998	35.7594	26.0635	30.2264	48.2866	37.421	48.5535	41.8876	48.8589	44.6337	32.7295	33.3651	71.0515	66.8229	46.5049	68.9051	62.0199	24.5114
Actc1	0.101868	0.0516097	0.24663	0.129698	0.0468371	0.153544	0.703878	0.0240516		0.0712539	0.0334398	0.713429	0	0.0189158	0.78836	0.0768331	0.0349179	0.727395	0.203551	0.136406	0.391541	0.315161	0.0458674	1.79945	0.0884556	0.025968	1.55411	0.999122	0.0455287	3.25153	0.0407895	0	0.184019	0.0648458	0.0331288	0.19545	0.11674	0	0.368743	0.0633288	0	0.48789	0.10625	0.020647	12.7748
Actg1	35.7142	39.7484	20.5686	21.0678	28.5612	17.7064	12.6698	34.5863		29.002	28.4745	23.9029	23.5082	20.883	15.297	35.5532	43.455	24.2525	21.8176	16.065	17.5096	38.327	26.5157	11.7747	28.1436	18.6203	12.8376	22.2395	19.5128	13.8465	14.2485	16.4357	15.424	22.0441	25.3995	24.2234	18.9017	20.4714	16.1507	32.3939	42.8676	33.1332	33.2693	33.7115	9.36013
Actg2	0.0584686	0.0411114	0	0.0749991	0.0341365	0	0	0.0342939		0.0885826	0.0308075	0.0298373	0	0.153938	0	0.639603	0.819492	0.411424	0.130585	0.180657	0.0172395	0.676183	0.291577	0	0.230834	0.125181	0	0.257667	0.0427676	0	0.0770529	0.208448	0.00243187	0.0517202	0.037182	0.000622667	0.0626584	0.0493118	0.00169664	0.0554896	0.183833	0.262528	0.10794	0.13999	0
Actl6a	0.4661	0.582436	0.232135	0.435246	0.331501	0	0	0.368374		0.527528	0.394374	0.607249	0.370769	0.29417	0.12162	0.583477	0.55448	0.442345	0.466612	0.432191	0.326568	0.497336	0.36528	0.3413	0.531387	0.447085	0.199945	0.420171	0.432889	0.342188	0.327188	0.283629	0.350945	0.513053	0.410248	0.394316	0.47697	0.484603	0.386219	0.877307	1.13367	0.871352	0.925359	0.84076	0.580428
Actl9	0	0	0	0	0	0	0	0.00218801		0	0	0	0	0.00388288	0	0	0.000815254	0	0	0	0	0	0.000437426	0	0	0.000138019	0	0	0.00062819	0	0	0	0	0	0	0	0	0	0	0	0.0212168	0	0	0.000389098	0
Actn1	2.28702	1.90589	0.630343	1.43386	1.68042	0.34563	2.11164	1.51923		2.332	1.62151	0.93889	3.32282	1.21233	0.332109	3.08781	3.59104	1.2724	3.40315	5.2364	2.6928	3.64092	3.71729	0.685923	3.94511	4.72562	0.679207	1.96733	1.14383	0.305086	0.854192	1.72436	0.342182	1.13799	1.84676	0.458247	0.748069	1.52818	0.317764	2.50209	2.583	2.22412	2.66214	3.73949	1.44586
Actn2	0.00652469	0	0	0	0.00205206	0	0	0.00597527		0.00280544	0	0.0265465	0	0.00264021	0.167449	0.00329062	0.000397697	0.0540131	0.0134806	0.0121399	0.0277473	0.0137368	0.00270871	0.130186	0	0.00366504	0.210071	0	0.00205787	0.250879	0.000992055	0	0.0127576	0.00685276	0.0046568	0.0108832	0.00632272	0	0.0190133	0	0	0.034628	0.0135368	0.0032163	0.901711
Actn3	0.080256	0.05709	0.326425	0	0.0167682	0	0	0.143138		0.00944635	0.0338521	0	0	0.013754	0	0.00668187	0.00349954	0.00334952	0.00192151	0	0.00582727	0.00614735	0.00562749	0	0	0.00499606	0	0.0305238	0.00792977	0	0.0176968	0	0.0185867	0.00789	0.00191865	0.00801034	0.00172989	0	0.00604982	0	0	0	0.024715	0.00133115	0
Actn4	1.50871	2.14717	1.2054	0.863087	1.27711	0.537716	1.40776	1.46874		1.14535	1.15768	1.24363	1.04047	0.826403	0.951362	1.11344	1.55911	1.22028	1.07373	1.65769	0.940449	1.21589	1.26092	0.62102	1.16279	1.16303	0.972691	0.807808	0.888943	0.755235	0.603689	0.879463	0.761648	0.820548	0.992202	0.795381	0.788556	0.81312	0.787087	1.45827	1.47853	1.63946	1.09809	1.45091	2.27888
Actr10	0.81482	0.612143	0.590859	0.790617	0.787933	1.04415	0	0.766073		0.795974	0.666477	0.923739	1.39386	0.670922	0.682922	0.969451	0.90764	0.677284	0.85233	0.693412	0.704849	0.987756	0.754298	0.751905	1.03311	0.866742	0.986584	0.615576	0.839202	0.650027	0.794733	1.50966	0.765101	0.939152	0.754658	0.815108	0.921274	0.951885	0.767532	0.887587	1.26082	0.749493	1.02966	1.08297	0.194382
Actr1a	0.307362	0.353767	0.550406	0.34638	0.340821	0.153544	0	0.34134		0.291977	0.350454	0.528394	0.105109	0.375839	0.961405	0.433931	0.525047	0.659481	0.391962	0.442413	0.41726	0.398931	0.395775	0.440529	0.347764	0.325402	0.339875	0.347128	0.418722	0.392841	0.23673	0.640012	0.433562	0.341688	0.417443	0.523626	0.334317	0.459691	0.50881	0.547494	0.539634	0.919147	0.507386	0.634357	0
Actr1b	0.326086	0.312542	0.358358	0.498445	0.391807	0.192086	0	0.334097		0.388644	0.320092	0.37911	0.399404	0.388678	0.272558	0.536052	0.623848	0.385591	0.494218	0.546081	0.458661	0.600552	0.497547	0.447399	0.474993	0.400692	0.324451	0.367332	0.429394	0.364798	0.280514	0.323646	0.346997	0.385261	0.456767	0.429759	0.396224	0.354238	0.416665	0.620368	0.544356	0.699953	0.501315	0.558265	0.901711
Actr2	0.575001	0.684394	0.554334	0.201728	0.572958	0.192086	0.703878	0.578993		0.560876	0.611856	0.683602	0.44364	0.686475	0.931749	0.726978	0.726043	0.85963	0.529331	0.64982	0.604207	0.523161	0.640359	0.506392	0.606118	0.601711	0.547633	0.410159	0.684376	0.617193	0.487834	0.869902	0.549049	0.60355	0.770855	0.707968	0.620152	0.773964	0.727891	0.66759	0.666604	0.739731	0.64483	0.738843	0.58585
Actr3	2.09169	2.03559	1.02515	1.46613	1.42672	1.4735	1.40776	1.4284		2.03654	1.71515	1.78437	1.85047	1.58049	0.80962	2.89529	2.91643	1.78063	1.87173	2.25867	1.32075	2.57054	1.73203	0.779792	2.358	2.11025	1.32241	2.18352	1.5215	0.989533	1.19963	1.05886	0.953237	1.96159	1.81674	1.37361	1.76275	1.34932	1.12342	3.83814	3.47528	2.68138	3.52903	3.29459	1.47401
Actr3b	0.0168589	0	0	0.0489541	0.0249125	0	0	0.0105201		0.0316845	0.019174	0.0169962	0.329854	0.0648761	0	0.0307516	0.0307757	0.0121344	0.0220881	0.0294847	0.0180215	0.0386787	0.0286637	0	0.128377	0.0286079	0.0632511	0.0548694	0.0198127	0.0299913	0.0288772	0.0250197	0.0288949	0.0178123	0.021933	0.0210046	0.0188999	0.0253466	0.0174537	0.0446649	0	0	0.0194821	0.0146388	0
Actr5	0.0647964	0.087823	0.153892	0.128259	0.0678389	0.192086	0.703878	0.0636911		0.0688266	0.0500714	0.079166	0	0.0545351	0.090596	0.066796	0.0645498	0.0549493	0.0728112	0.0783072	0.0647593	0.068341	0.0592398	0.049629	0.0449726	0.0832567	0.123553	0.135828	0.0801438	0.11951	0.0768729	0.0265508	0.105765	0.0715684	0.0688861	0.105262	0.0970226	0.0106936	0.105167	0.0435308	0.0767637	0.14015	0.127168	0.0869846	0
Actr6	0.172726	0.160718	0.109622	0.123953	0.138607	0	0	0.153779		0.199836	0.0976267	0.148528	0.193409	0.0910945	0.194957	0.187019	0.105241	0.105218	0.153583	0.163407	0.0917186	0.139881	0.0842305	0.12339	0.12981	0.183653	0.0845409	0.172411	0.129929	0.0796331	0.290269	0.0641874	0.12958	0.205184	0.0981617	0.117116	0.19708	0.139126	0.113572	0.37252	0.253177	0.179204	0.332024	0.220399	0
Actr8	0.224337	0.0615485	0.171676	0.332029	0.218645	0.153544	0.703878	0.208762		0.19504	0.123532	0.282446	0.189268	0.168502	0.338255	0.194973	0.197515	0.187891	0.254662	0.239008	0.183367	0.210471	0.160974	0.167883	0.139195	0.203877	0.243297	0.215332	0.208865	0.249581	0.236849	0.219881	0.30241	0.23442	0.222988	0.285546	0.222761	0.279173	0.272395	0.249564	0.155997	0.127349	0.205846	0.192396	0.503651
Acvr1	0.135285	0.113881	0.111528	0.379311	0.176234	0	0	0.141252		0.160856	0.158231	0.161617	0.322162	0.210903	0.0651067	0.160729	0.176996	0.198158	0.227864	0.268952	0.316086	0.139025	0.283678	0.115615	0.123721	0.279202	0.273322	0.0291558	0.205714	0.163848	0.187778	0.207308	0.146797	0.207096	0.278209	0.154322	0.126092	0.236015	0.156273	0.134039	0.0683553	0.177009	0.154239	0.194903	1.22178
Acvr1b	0.0351142	0.0640596	0.105015	0	0.08318	0	0	0.0974167		0.0541633	0.0634476	0.0784063	0	0.0641702	0.0614447	0.0288317	0.0386901	0.0347962	0.0492301	0.0806682	0.0477624	0.0339329	0.0572758	0.0431644	0.0743014	0.043335	0.123553	0.0077647	0.0339302	0.0667822	0.046022	0.0763309	0.0568209	0.0203608	0.0421246	0.038185	0.0664296	0	0.0488386	0.0501958	0.0242881	0.0078649	0.0369605	0.0454197	0.194382
Acvr1c	0	0	0	0	0.00113513	0	0	0.00229796		0.00138204	0.00419312	0	0	0	0	0.000349735	0	0	0	0.00104218	0	0.00179034	0.000335838	0	0	0.000404597	0	0	0.000190043	0	0.000199954	0	0	0	0	0	0.00117654	0	0	0	0	0	0	0	0
Acvr2a	0.0392385	0.117882	0.0223944	0	0.0497655	0	0	0.0666923		0.0292943	0.0313532	0.0233902	0.0525547	0.0850178	0	0.0318119	0.0387032	0.0504814	0.0532087	0.0329136	0.0622988	0.03005	0.0481797	0.0947935	0.00819158	0.0467181	0	0.0332482	0.05948	0.0402998	0.0643132	0.178024	0.0393788	0.0339261	0.0373988	0.0376007	0.0475525	0.105909	0.0479078	0.164564	0.0268834	0.0814706	0.024528	0.042996	0
Acvr2b	0.0459007	0	0.0640718	0	0.0304662	0	0	0.0402335		0.0173282	0.00951442	0.0815802	0	0.0179726	0	0.010193	0.0108636	0.0896386	0.00886379	0.0197266	0.0194941	0.0113037	0.010203	0.0231813	0	0.00874555	0	0	0.0306075	0	0.0388333	0	0.0617831	0.0162154	0.0181382	0.0409309	0.0315882	0.00591453	0.04973	0	0	0	0	0.00800587	0
Acvrl1	0.100631	0.302433	0.291775	0.474964	0.282692	0.782237	0	0.229245		0.115957	0.226184	0.766197	0.828519	0.517782	1.14882	0.247079	0.626863	0.895444	1.04636	0.981597	0.970813	0.622559	1.05641	1.78129	0.659532	0.72643	0.758533	0.607058	1.05541	1.20414	0.471257	0.725109	1.08905	0.648404	0.959282	1.1109	0.890944	1.37823	1.32871	0.690525	1.76207	0.925605	0.395216	0.809692	0.698034
Acy1	0.100657	0.116569	0.0792747	0.0690217	0.110274	0	0	0.0958177		0.111544	0.0655785	0.187573	0	0.0816615	0.137642	0.0962119	0.105617	0.0462924	0.108938	0.0693597	0.0952726	0.119981	0.0888044	0.126284	0.139894	0.069637	0.298677	0.0690661	0.0946906	0.0766953	0.0902642	0.218977	0.0896705	0.109484	0.0888424	0.101283	0.103204	0.109651	0.0945315	0.229615	0.104097	0.082702	0.127904	0.100282	0.194382
Acy3	0.149569	0.151749	0.0777658	0.0749991	0.148691	0.192086	0.703878	0.123136		0.132404	0.0518021	0.0897193	0	0.141475	0.200453	0.0566993	0.0469197	0.0380181	0.131181	0.0553522	0.0773848	0.106276	0.0851233	0.0633264	0.107933	0.0972019	0.0991631	0.07274	0.120382	0.16487	0.177192	0.112337	0.160156	0.0965448	0.0578221	0.0858867	0.14004	0.107564	0.119003	0.0197671	0.0206664	0.0496606	0.0607303	0.054461	0
Acyp1	0.586223	0.378982	0.560051	0.758433	0.396413	0.659977	1.40776	0.504121		0.457185	0.223874	0.396897	0.30621	0.317205	0.403271	0.259596	0.190418	0.274483	0.300663	0.12041	0.236683	0.259231	0.235292	0.188561	0.285427	0.346026	0.291776	0.294811	0.296421	0.341587	0.398385	0.414708	0.367039	0.375284	0.321783	0.381416	0.432167	0.129485	0.338781	0.251474	0.2099	0.243758	0.267341	0.264901	0.890867
Acyp2	0.0951654	0.0448634	0.111831	0.121353	0.213892	0.34563	0	0.0876763		0.218815	0.13688	0.554182	0.217053	0.284315	0.234102	0.17848	0.145675	0.349371	0.287963	0.159851	0.274353	0.165847	0.176325	0.421657	0.264406	0.264678	0.3861	0.348735	0.46115	0.603939	0.496192	0.717355	0.482257	0.642754	0.513098	0.627059	0.575312	0.203192	0.472417	0.542758	0.323346	0.430031	0.344157	0.385671	0.637105
Ada	0.105839	0.0453407	0.00824991	0.0527869	0.0993727	0	0	0.0547044		0.144947	0.0901971	0.0801413	0.169579	0.151865	0.0696207	0.372742	0.46043	0.0957229	1.06546	0.734542	0.500677	1.30887	0.768253	0.142915	1.45174	0.93521	0.312918	0.26323	0.161921	0.0473733	0.159704	0.206359	0.0786698	0.190505	0.149747	0.0406224	0.157544	0.287551	0.073844	0.0906057	0.188771	0.191148	0.225849	0.332166	0
Adad1	0	0	0	0	0	0	0	0		0	0	0	0	0	0	0	0.00119733	0	0	0	0	0	0.000297886	0	0	0.000422869	0	0	8.69714e-05	0	0	0	0	0	0	0	0	0	0	0	0	0	0	0.00117415	0
Adal	0.0417961	0.0600309	0.0239517	0	0.0342945	0	0	0.0407377		0.0499135	0.0179703	0.0390785	0.0644695	0.0397443	0	0.0392943	0.0403413	0.0615411	0.0709375	0.0762848	0.0690983	0.0479929	0.0554455	0.0917967	0.0576984	0.0664474	0.254777	0.0568449	0.0609433	0.0524844	0.0392996	0.019574	0.0422291	0.0612771	0.0625926	0.0519262	0.0730131	0.0471567	0.048322	0.0928594	0.0779891	0.0518734	0.0424135	0.0585219	0
Adam10	1.08387	1.44799	0.901532	0.180415	0.6994	0.192086	0	1.09337		0.678724	0.445936	0.425824	0.35108	0.495959	0.214928	0.413406	0.420333	0.372147	0.354247	0.750749	0.363924	0.300898	0.386843	0.331914	0.290314	0.386862	0.434848	0.220579	0.386585	0.290017	0.298038	0.451347	0.245772	0.362772	0.445008	0.330021	0.287982	0.386685	0.327172	0.191271	0.397251	0.341305	0.351205	0.433685	0.580428
Adam11	0.00922838	0	0	0.190699	0.0169417	0	0	0.00407665		0.0115188	0.00620156	0.109976	0	0.00871761	0	0.00673382	0.00928017	0.0157253	0.0100329	0.216772	0.0240434	0.0107747	0.0166204	0	0	0.0177631	0	0.0150141	0.0191482	0.0266458	0.0186552	0.0356084	0.0231391	0.0104832	0.0226267	0.00951429	0.00231866	0.00591453	0.0113983	0	0	0	0	0.00881602	0
Adam12	0.161657	0.326627	0.0525208	0.232747	0.284657	0	0	0.138356		0.408665	0.244186	0.0608822	0.30621	0.776643	0.118621	0.491581	0.493149	0.0692613	0.258698	0.576064	0.251759	0.360126	0.341816	0.10506	0.456301	0.204202	0.090763	0.0956386	0.10269	0.0239476	0.142346	0.209293	0.0122956	0.129785	0.13817	0.00954239	0.108617	0.0497083	0.0174956	0.15902	0.426187	0.28415	0.24981	0.250454	0
Adam15	0.478907	0.778686	0.581658	0.17414	0.542256	0.153544	0	0.651655		0.397806	0.57789	0.807101	0.197042	0.602433	0.51616	0.353199	0.511124	0.57572	0.441853	0.780841	0.614076	0.330491	0.558897	0.718895	0.400204	0.470156	0.301184	0.298987	0.569204	0.421308	0.357581	0.610803	0.509265	0.502686	0.912667	0.659188	0.463907	0.717055	0.523097	0.203795	0.526606	0.642192	0.331392	0.472604	0.226783
Adam17	0.213438	0.272131	0.137013	0.390088	0.245839	0	0	0.252867		0.214118	0.251251	0.273677	0.257693	0.313354	0.240601	0.201682	0.23565	0.321945	0.20095	0.401476	0.280861	0.138692	0.236761	0.308966	0.197252	0.229993	0.254777	0.149673	0.310744	0.265478	0.300868	0.243047	0.263783	0.316046	0.368352	0.337028	0.329828	0.334247	0.37795	0.263181	0.33764	0.318551	0.410723	0.319277	0
Adam19	0.0436433	0.194213	0.0466659	0.121809	0.110093	0	0	0.0482809		0.0941599	0.161579	0.136381	1.01447	0.516421	0.654598	0.478958	0.512017	0.427291	0.400229	0.692393	0.438376	0.387694	0.48352	0.652738	0.396436	0.389649	0.175304	0.326251	0.46582	0.415194	0.308646	0.391064	0.339195	0.424741	0.484341	0.456563	0.529051	1.01431	0.724213	0.29842	0.573381	0.377937	0.361404	0.398805	0.415744
Adam1a	0	0	0	0	0	0	0	0		0	0	0.00289853	0	0	0	0	0	0.00411347	0	0	0	0	0	0	0	0	0	0	0	0	0	0	0	0	0	0.00027725	0	0	0.00157875	0	0	0	0	0	0
Adam22	0.00234589	0.0188421	0.00600369	0	0.00881685	0	0	0.00171124		0.0120397	0.0120531	0.0329423	0	0.0307435	0	0.0184896	0.0173962	0.00943931	0.0106759	0.0245712	0.0151898	0.0155309	0.0100493	0	0.017519	0.00680977	0	0	0.0167729	0.0423985	0.0259761	0.307617	0.0198041	0.0255357	0.0200254	0.0190924	0.0164146	0	0.0109301	0	0.0157754	0	0.0175774	0.0131309	0
Adam23	0.115926	0.170235	0.0869097	0.152774	0.216659	0	0	0.182453		0.108816	0.0864681	0.317854	0.0525547	0.140663	0.0650775	0.0473255	0.0566821	0.0451203	0.0224722	0.107176	0.0218745	0.0423912	0.0330436	0.0168666	0.0519312	0.0177115	0	0.0230268	0.0181212	0.0210514	0.0486625	0	0.0152435	0.0165327	0.0235372	0.00671792	0.0341605	0	0.00751836	0	0	0.0343813	0	0.0174282	0
Adam28	0.00303118	0	0	0	0.00319833	0	0	0		0.00164148	0	0.00407681	0	0.00348006	0	0.00226629	0.00163016	0	0.00530959	0.0103654	0.000642538	0.000457555	0.00165456	0	0	0.00359957	0	0	0.00265501	0	0.00584143	0	0.00278175	0.00396452	0.00178539	0.00404984	0.00233547	0	0.00335089	0	0	0	0.011483	0.00283531	0
Adam30	0	0	0	0	0.00198113	0	0	0		0.00200939	0.00130675	0	0	0	0	0.000658464	0.000880644	0	0	0	0.00123473	0.0010765	0.000823072	0	0	0.00122494	0	0	0.00106346	0.00847865	0.000841206	0	0.000600266	0.00171722	0.00195685	0.000649092	0.00127847	0	0.000762048	0	0	0	0	0	0
Adam32	0.00211354	0	0.0118124	0	0.00156269	0	0	0.00181304		0.000678102	0.00165045	0.00551809	0	0.00184919	0	0.00077793	0.000382748	0	0.0023681	0	0.0016817	0.0003818	0.00207771	0	0	0.00104146	0	0	0.00244408	0	0	0	0.00224372	0.000573887	0.00303325	0.0033616	0.00583725	0	0.00358625	0	0	0	0	0.00115326	0
Adam33	0.630615	0.163891	1.78916	0.221795	0.394217	0.506433	0.703878	0.913379		0.130965	0.111762	0.0828914	0	0.282558	0.324057	0.0131632	0.00952473	0.0216282	0.0206623	0.057184	0.0263724	0.0254732	0.0259158	0.189286	0	0.0106675	0.272331	0.00669936	0.04608	0.136732	0.0894465	0	0.0862172	0.0408267	0.0436314	0.00464942	0.0565196	0.00591453	0.00532534	0	0	0	0.0081083	0.0155272	0
Adam4	0	0	0.0137319	0	0.0028532	0	0	0		0.00352246	0	0.00690073	0	0.0060744	0	0.00434315	0.00303789	0.00269189	0.00281412	0.00165533	0.00308333	0.0038668	0.00316972	0	0	0.003446	0	0	0.0041816	0	0.00235307	0.0207715	0.0049815	0.0028486	0.00325968	0.00330643	0	0	0.00488479	0.0358038	0.0157642	0.00735043	0	0.00390623	0
Adam5	0	0	0	0	0.00272003	0	0	0		0.0029046	0.00562825	0.00286601	0.0525547	0.0194202	0	0.0141299	0.0216305	0.0306611	0.032545	0.0248994	0.0352421	0.0211244	0.0334134	0.0252471	0.0164324	0.0397506	0	0.015872	0.0347403	0.0515144	0.0412671	0	0.0286327	0.0531691	0.0340012	0.0358887	0.0468227	0	0.0303213	0.0531605	0	0.0264912	0.0334727	0.0315813	0
Adam8	0.037068	0.0151676	0	0	0.0154066	0	0	0.0116389		0.0252507	0.00992127	0	0	0.00450251	0	0.0153062	0.00973194	0.00269803	0.00379392	0.00582259	0.00545882	0.00933668	0.00857716	0	0	0.0046287	0	0.0077647	0.0024785	0	0.00603175	0	0.00212617	0.00339248	0.00132474	0.00198479	0.0160107	0	0.00181588	0	0	0	0.00484952	0.00273856	0
Adam9	0.352986	0.504986	0.20442	0.0624395	0.361048	0.384172	0	0.401784		0.310298	0.337793	0.46029	0.0722439	0.487333	0.551404	0.462463	0.588782	0.68227	0.676718	1.02514	0.610317	0.46678	0.701127	0.458351	0.622324	0.754145	0.362108	0.569785	0.749538	0.67957	0.433747	1.04233	0.461416	0.844984	1.00009	0.806719	0.742337	0.926087	0.705981	0.653481	0.823226	0.735314	0.46797	0.639059	0
Adamts1	0.12654	0.431623	0.555864	1.117	0.411786	0.506433	0	0.110076		0.640048	0.378569	0.443705	0.157664	0.577059	0.782066	0.418327	0.312818	0.446745	0.324965	0.5404	0.349944	0.338759	0.241306	0.700987	0.365504	0.25875	0.721268	0.368411	0.515913	0.779627	0.619334	0.407328	1.33358	0.327056	0.29597	0.560161	0.397255	0.202318	0.683314	0.197706	0.289128	0.258479	0.177256	0.251269	0.388765
Adamts10	0.0791392	0.233952	0.1547	0.0903342	0.226725	0.153544	0.703878	0.197994		0.122539	0.247812	0.438613	0.430785	0.441934	0.649322	0.184591	0.416677	0.749897	0.683707	1.55808	0.938176	0.319367	0.685729	1.5114	0.471766	0.595119	0.938801	0.365343	0.732779	0.819846	0.562852	0.584038	0.848751	0.540579	0.675786	0.723896	0.589497	1.62576	0.961199	0.157707	0.434744	0.665522	0.166044	0.434341	2.32088
Adamts12	0.00195219	0.15129	0.0428193	0.0690217	0.051584	0.467891	0	0.02309		0.024356	0.0537586	0.10971	0.274061	0.468735	0.23583	0.10135	0.15546	0.14402	0.166217	0.386269	0.249479	0.128043	0.26201	0.230968	0.107187	0.170117	0.364085	0.0864327	0.231566	0.17757	0.198192	0.477732	0.23367	0.21775	0.345008	0.192596	0.196448	0.290904	0.21619	0.0919515	0.026147	0.141088	0.0535606	0.140658	0
Adamts13	0	0	0	0	0.00138219	0	0	0		0	0	0	0	0	0	0	0	0	0	0	0	0	0.00021664	0	0	0.0007664	0	0	0.000757231	0	0	0	0	0	0	0	0	0	0	0	0	0	0	0	0
Adamts14	0.0136095	0	0	0	0.03923	0	0	0.00940026		0.0659067	0.0327519	0.0610851	0.189268	0.0500634	0	0.116843	0.0766336	0.0472105	0.0196816	0.069682	0.0229101	0.0380909	0.031143	0.0319922	0.0152157	0.0132993	0	0	0.0265594	0.0193209	0.0138103	0	0.015675	0.0178676	0.0268619	0.0177471	0.0405824	0.0215974	0.0295587	0.0215731	0.0732203	0.0411008	0.0415547	0.0386207	0
Adamts15	0.0501081	0.0668017	0.0628294	0.55155	0.296308	1.25739	0	0.0766193		0.213051	0.110307	0.174091	0.224827	0.748794	0.322249	0.0931359	0.0589068	0.213051	0.0693895	0.198694	0.139221	0.0507932	0.0561489	0.240833	0.0661969	0.0305676	0.0954153	0.208174	0.225103	0.351094	0.487936	0.215496	0.3942	0.136283	0.220943	0.0968573	0.157448	0.0491094	0.177655	0.096021	0.034414	0.0642583	0.109314	0.0453638	0.503651
Adamts16	0.00713422	0	0	0	0.0413943	0	0	0.00860892		0.0330206	0.00919476	0.00310547	0	0.0309353	0	0.0233871	0.0355146	0	0.0300084	0.178714	0.0180245	0.0272796	0.114579	0	0	0.0676432	0	0.00614628	0.00871761	0	0.0078341	0.0509103	0	0.00810248	0.0184566	0.00109658	0.00522177	0	0.000566181	0	0.0194401	0.0143352	0.00458641	0.0297975	0
Adamts17	0.00198259	0	0	0	0.0177756	0	0	0.00331087		0.00211401	0.00362483	0	0	0.0279569	0	0.00220697	0.00744262	0.0153777	0.0316595	0.0273226	0.0569463	0.0103286	0.0546869	0.020186	0	0.0326191	0	0.00863856	0.0104496	0	0.0197464	0.0893012	0.00548669	0.00341941	0.00573712	0.00119056	0.00578999	0.0218347	0.00214724	0	0.011108	0	0	0.00750202	0
Adamts18	0	0	0	0	0	0	0	0		0	0	0	0	0.00894051	0	0	0.000750562	0	0	0	0	0	0	0	0	0	0	0	0	0	0	0	0	0	0	0	0	0	0	0	0	0	0	0	0
Adamts19	0.024759	0	0	0	0.0534636	0	0	0.00655616		0.0882995	0.0232668	0.0782398	0	0.066299	0.144743	0.112912	0.0324386	0.0420021	0.00456752	0.00196873	0.0216559	0.00569829	0.00388177	0	0.0107061	0.00415517	0	0	0.0307383	0.0334634	0.0555716	0	0.0304056	0.0631442	0.051602	0.0403947	0.0208578	0.00591453	0.0276779	0.0441541	0	0.0164249	0.0504957	0.0127826	0
Adamts2	0.784328	1.57029	1.09902	0.963327	1.57247	2.19541	2.11164	1.34732		0.92535	1.26674	1.1099	2.52841	4.11686	3.58138	1.76972	2.54376	2.54289	5.80028	8.53609	5.68545	2.80888	4.93969	4.23906	4.20014	5.20894	4.17327	1.92973	3.81593	2.53249	3.67547	4.42452	2.46475	3.71412	4.21252	2.66569	3.15439	4.25264	2.35298	2.23496	1.96453	3.30489	2.7022	3.22908	0.642527
Adamts20	0.00473697	0	0.0089914	0	0.0109859	0	0	0		0.0180622	0.0027843	0.00302968	0	0.00583338	0	0.00414226	0.0156808	0.00552307	0.013369	0.059822	0.0111679	0.0141157	0.0140244	0	0.0123087	0.0176104	0	0.00927334	0.0105451	0	0.00536133	0.0207715	0.00402384	0.00811728	0.00986464	0.00242828	0.0108873	0	0.00730694	0	0	0.0230176	0.0131003	0.0262189	0
Adamts3	0.02004	0.0613132	0.00374832	0	0.042229	0	0	0.00700418		0.0920322	0.035498	0.0533228	0	0.044643	0	0.0687571	0.0367837	0.00998852	0.0301638	0.0198988	0.02324	0.0255625	0.0175053	0	0.0329526	0.018211	0	0.00669936	0.0153168	0.00683901	0.0347162	0.0770551	0.0129456	0.027781	0.0165961	0.00639999	0.0195706	0.019164	0.011104	0.03202	0.0165886	0.0078649	0.0430092	0.0142615	0
Adamts4	0.0242027	0.0227791	0.00751575	0	0.105023	0	0	0.0180479		0.138867	0.0606863	0.0661254	0.0722439	0.298724	0	0.231549	0.158414	0.141638	0.141872	0.197939	0.142855	0.182717	0.119127	0.189433	0.131906	0.105505	0	0.144176	0.0678566	0.0412978	0.0962313	0.116133	0.0496784	0.0780724	0.0991952	0.0376809	0.0648171	0.0837082	0.0541302	0.217183	0.127247	0.0939837	0.207764	0.0942155	0
Adamts5	0.527423	0.518076	0.725562	0.733094	1.05136	0.806261	0	0.440987		1.12376	0.784812	1.96337	0.560499	1.61515	2.85066	0.958357	0.954643	3.37807	0.813725	1.04798	1.08102	0.496867	0.584095	3.99798	0.674199	0.664729	4.38261	1.43217	2.6963	5.56994	1.46719	1.19872	3.77807	3.56366	2.85059	5.73699	4.45155	3.2646	5.54047	3.24951	2.39253	3.09684	2.2631	1.60136	3.68156
Adamts6	0.0042156	0	0	0	0.0259362	0	0.703878	0.0112388		0.0138969	0.0508558	0.00930793	0	0.0672577	0	0.0655359	0.0576365	0.0606469	0.0527912	0.137057	0.0510412	0.0653351	0.0803957	0.049629	0.0764752	0.0764209	0	0.0077647	0.0408286	0	0.0507309	0	0.0256567	0.059141	0.0623019	0.0266052	0.0192276	0.0281122	0.0182553	0.0252889	0	0.0437395	0.0150401	0.0347621	0
Adamts7	0.0711881	0.0845748	0.0816406	0.0624395	0.0632787	0	0	0.0529249		0.0612363	0.0343817	0.0738926	0	0.0741802	0.0524973	0.0249678	0.0288683	0.0273774	0.0287922	0.0589773	0.0583126	0.0160686	0.0584847	0.122215	0.0271648	0.0431314	0	0	0.0297636	0.0176226	0.0258798	0.0679399	0.0194775	0.0258507	0.026702	0.0245934	0.0140127	0.0612301	0.022288	0	0.0173664	0.0503116	0	0.0308947	0
Adamts8	0.0200228	0.0715228	0	0	0.014009	0	0	0.00988596		0.00632844	0.00476356	0.0648951	0	0.0269727	0.0650775	0.0208229	0.0540028	0.0373398	0.0348295	0.076582	0.0391142	0.00910412	0.041627	0	0.0529737	0.0555791	0	0.0666134	0.106336	0.00830973	0.0171954	0	0.00513135	0.19993	0.193421	0.0206718	0.0842283	0.262495	0.0122686	0.170532	0.219416	0.0738439	0.236708	0.193317	0
Adamts9	0.137551	0.199522	0.0617287	0.287142	0.283354	0	0.703878	0.165905		0.402325	0.160584	0.0141633	0.105027	0.153594	0.0324005	0.0758094	0.0512925	0.0297048	0.0222668	0.0677512	0.0373748	0.0317403	0.0245569	0.0911834	0.0199209	0.0174436	0	0.00882457	0.0325443	0.0389985	0.0312918	0	0.0230006	0.0297463	0.0340516	0.0155735	0.028464	0.0281122	0.0286841	0.111699	0	0.0410801	0.0906246	0.026665	0
Adamtsl1	0.347387	0.383793	0.911167	0.569518	0.633627	0.768344	2.11164	0.483617		0.413616	0.219783	0.0924812	0.0644695	0.664215	0.205612	0.289991	0.192851	0.0621407	0.0821173	0.134009	0.0524738	0.220229	0.103902	0.0373095	0.127495	0.0596651	0	0.172496	0.0661081	0.0448418	0.253317	0	0.0748837	0.0707693	0.0516671	0.013291	0.120082	0.0415136	0.0142188	0.0358038	0.0242881	0.0309741	0.120883	0.0204189	0
Adamtsl2	0.0600931	0.392182	0.249116	0.0624395	0.226605	0	0	0.149206		0.0657544	0.237055	0.282129	0	0.201122	0.708341	0.0842037	0.427724	0.809787	2.06616	3.39322	1.37796	0.250514	1.54189	1.87812	1.14876	1.56658	3.89726	0.975848	1.81154	1.35772	0.647191	1.02691	1.03428	1.42367	1.33696	1.44479	1.36517	2.17587	1.44498	0.544071	0.90977	0.66965	0.508077	0.832356	0.503651
Adamtsl3	0.039295	0.138091	0.115023	0	0.0289165	0	0	0.0599512		0.00971411	0.0945094	0.145752	0	0.0800701	0.13871	0.0317797	0.116464	0.23548	0.193323	0.705791	0.196837	0.0917049	0.347249	0.265798	0.227953	0.372107	0.149769	0.0684776	0.189322	0.169244	0.0844827	0.177209	0.14276	0.20142	0.25302	0.435983	0.233367	0.21274	0.274731	0.0187427	0.2012	0.228546	0.14845	0.232294	0
Adamtsl4	0.0982004	0.157553	0.152242	0.0489541	0.134362	0.153544	0	0.12016		0.0764893	0.13151	0.164808	0.149263	0.137909	0.220831	0.0706739	0.101488	0.230169	0.0805965	0.203264	0.245971	0.0574479	0.159523	0.149407	0.0596451	0.126455	0.090763	0.0744337	0.212835	0.319634	0.105087	0.140519	0.247676	0.271924	0.354943	0.463324	0.171746	0.161971	0.246235	0.0197973	0.0095584	0.212673	0.0789589	0.0885419	0.194382
Adamtsl5	0.259002	0.449035	0.491984	0.0489541	0.257804	0	0	0.380572		0.102665	0.157401	0.251826	0.136713	0.226012	0.140475	0.117702	0.14086	0.479623	0.151177	0.141969	0.271953	0.0999859	0.180481	0.225598	0.11377	0.149801	0.172002	0.221453	0.39085	0.329394	0.223791	0.152346	0.327826	0.438968	0.676518	0.596448	0.295333	0.607104	0.360203	0.0452967	0.283099	0.414911	0.249643	0.182104	0.226783
Adap1	0.00675401	0.0227791	0.0742825	0	0.00917503	0	0	0.0246209		0.0030775	0.000792131	0	0	0.00120227	0	0.000101094	0.00125005	0	0	0	0.0016024	0	0.000539064	0	0	0.00020849	0	0	0.00336794	0.0101112	0.0037313	0	0.00161815	0.0037481	0.00307587	0.000943418	0	0	0.00231754	0	0	0	0	0.00132495	0
Adap2	0	0.0253212	0.00945945	0	0.00415062	0	0	0.001423		0.00194914	0.00151156	0.117267	0	0.00945475	0	0.00559392	0.0132234	0.126679	0.0285042	0.00559896	0.038832	0.0148706	0.0149037	0.318691	0	0.0105354	0	0.171915	0.143838	0.368087	0.027463	0	0.394252	0.0244564	0.02308	0.198001	0.143336	0.19968	0.560683	0	0.0402523	0.0829221	0	0.0251549	0
Adap2os	0.00382941	0.0506424	0.0151706	0	0.00212251	0	0	0.001423		0.00509101	0.00748088	0.184447	0	0.00462117	0	0.00733338	0.0104132	0.266729	0.0305292	0.0152321	0.0310184	0.0145981	0.0120847	0.358777	0.0121206	0.0136463	0.0845409	0.0486165	0.08849	0.3265	0.0130541	0	0.392492	0.015927	0.0142414	0.203276	0.148721	0.0865556	0.497057	0.0562892	0.0194401	0.0698931	0	0.0206789	0
Adar	0.201064	0.225698	0.399563	0.121809	0.185346	0	0.703878	0.265656		0.158974	0.19851	0.232398	0.0722439	0.147009	0.182843	0.101305	0.110426	0.107104	0.048593	0.214727	0.105367	0.0760041	0.0997127	0.0654906	0.0425031	0.0598481	0.191636	0.0185319	0.0778442	0.106903	0.0684455	0.019574	0.0764545	0.0533057	0.110322	0.0682693	0.0511165	0.0944301	0.0856255	0.0671945	0.0566436	0.0926696	0.047436	0.0781811	0
Adarb1	0.0588546	0.161536	0.0487749	0.0690217	0.114526	0.499174	0	0.0491012		0.0982383	0.0931405	0.0726737	0.277382	0.248547	0.184607	0.332484	0.431844	0.202613	0.551044	0.892273	0.424325	0.308169	0.705749	0.192718	0.564725	0.780881	1.58842	0.127197	0.263304	0.116815	0.390939	0.296858	0.196082	0.292759	0.370127	0.18178	0.25661	0.182459	0.185892	0.0881715	0.178966	0.146337	0.290155	0.399696	0.221361
Adat1	0.030045	0	0.0285375	0	0.0306193	0.467891	0	0.0164898		0.0336595	0.0160492	0.0282613	0	0.0251605	0	0.0274889	0.0338098	0.0406852	0.0396529	0.0447294	0.038338	0.0219968	0.0336953	0.0372992	0.0359333	0.0361682	0.0632511	0	0.0378819	0.0256461	0.0328396	0	0.0405736	0.0232425	0.0348068	0.0359557	0.0262115	0.018953	0.0416612	0.0438914	0.0157754	0	0.0169593	0.0372901	0
Adat2	0.0443179	0.0930812	0.0303334	0	0.0457908	0	0	0.0503437		0.0623922	0.0392693	0.0535751	0	0.0576213	0.106644	0.0691426	0.0482053	0.0348613	0.0279719	0.00459199	0.0307002	0.0535951	0.0438826	0.0564188	0.0353335	0.0408561	0.0954153	0.0544876	0.0464059	0.0280137	0.0374775	0	0.0486602	0.0560447	0.0492396	0.0466357	0.0538656	0	0.0439642	0.0864847	0.0718411	0.0383525	0.0554799	0.0407088	0.194382
Adck1	0.0750783	0.093962	0.0620482	0	0.087804	0	0	0.0905436		0.104598	0.0698348	0.118297	0.117024	0.0704451	0.0555775	0.0890656	0.0851957	0.0492395	0.0841504	0.123417	0.0819983	0.0889458	0.0785236	0.0836866	0.1111	0.0798119	0.278215	0.0453281	0.0808236	0.046641	0.0754622	0	0.0815978	0.0813863	0.0988543	0.0868084	0.0734634	0	0.0859321	0.096905	0.0435338	0.10179	0.105834	0.0604436	0
Adck2	0.130644	0.0478577	0.191926	0.123953	0.0864813	0	0	0.129243		0.102003	0.0615877	0.0779367	0	0.0814079	0.130347	0.066957	0.0810064	0.0756087	0.111604	0.0922064	0.124745	0.0985176	0.098753	0.145931	0.0688018	0.0962827	0.150472	0.0578383	0.0935639	0.159412	0.106038	0.360894	0.136828	0.0811921	0.103197	0.138261	0.104517	0.103768	0.137676	0.0707909	0.0394103	0.0524611	0.0657411	0.047279	0
Adck5	0.178705	0.190114	0.333436	0.17674	0.188559	0	0	0.342422		0.117614	0.118606	0.117222	0	0.126388	0	0.0881736	0.108487	0.129391	0.122524	0.20075	0.118415	0.128236	0.124079	0.0635701	0.121235	0.103691	0.123553	0.0894313	0.125035	0.0867446	0.119607	0.308483	0.12384	0.0846961	0.075744	0.117495	0.105161	0.0445106	0.118747	0.0823153	0.161617	0.0503157	0.072132	0.0653141	0.226783
Adcy1	0.000807498	0	0	0	0.00274865	0	0	0.00379091		0.00747361	0.00511908	0.00338065	0	0	0	0.00450648	0.00446083	0.00589752	0.00221447	0	0.000721214	0.00231222	0.00249019	0	0.0111823	0.00126402	0	0	0.000498706	0	0.00557194	0	0.00371946	0.000670175	0	0.00122428	0	0	0.000854061	0	0	0	0	0	0
Adcy10	0	0	0	0	0.000832441	0	0	0.00364041		0.00114624	0	0	0	0	0	0.00174037	0.00155903	0	0	0.00939232	0.000487954	0.00464522	0.00104104	0	0	0.00172221	0	0	0.000166629	0	0	0	0.000779795	0	0	0.00185987	0.000300666	0	0.000146035	0	0	0	0	0	0
Adcy2	0.00207228	0	0.0451121	0	0.00331071	0	0	0.00226194		0.00244866	0.00939068	0.00310547	0	0.00336223	0	0.00400414	0.00942982	0.0125065	0.00686806	0.0249475	0.00975875	0.00103483	0.0214477	0	0.00686629	0.0193044	0	0.0249775	0.0159765	0	0.000709252	0.106576	0.0128146	0.0112081	0.00695173	0.0177198	0.00854443	0.0218347	0.016299	0.064383	0.0165886	0.0492755	0.0193231	0.0206895	0
Adcy3	0.0769558	0.164353	0.147092	0	0.098987	0	0	0.10886		0.112042	0.130474	0.054678	0	0.113195	0.121326	0.0829784	0.0983174	0.0907507	0.143666	0.196858	0.152686	0.0778563	0.147081	0.108462	0.0606872	0.131993	0	0.250226	0.114683	0.16947	0.114417	0.235028	0.165441	0.0984559	0.112924	0.135514	0.151056	0.206484	0.179615	0.163441	0.0418475	0.0911762	0.0565446	0.120816	0
Adcy4	0.00845469	0.0262885	0	0	0.0177995	0	0	0.0199599		0.0116807	0.0173902	0.217222	0.0644695	0.0297977	0	0.03059	0.0518696	0.0452226	0.0525894	0.128278	0.0458288	0.0343073	0.0602583	0.0315736	0.0719285	0.0369695	0	0.015697	0.0425461	0.016545	0.0228342	0.0432453	0.0413107	0.0343903	0.0633441	0.0324599	0.0233834	0.026786	0.0393393	0.132111	0.0617467	0.0217929	0	0.0463015	0
Adcy5	0.00721989	0.0411114	0.00975201	0	0.0287966	0.153544	0	0.0225616		0.0249368	0.0208932	0.0238039	0	0.055645	0	0.0223714	0.0110691	0.0151817	0.0174576	0.00691007	0.0247282	0.00727539	0.013847	0	0	0.00744464	0	0.0249775	0.0200465	0	0.0485752	0	0.0229938	0.0195471	0.00812361	0.0100782	0.0116074	0.0534587	0.0107347	0	0	0	0	0.00281921	0
Adcy6	0.0406693	0.0188421	0.13618	0	0.0643978	0.153544	1.40776	0.0863083		0.041741	0.0583509	0.0714881	0	0.0697225	0.0376012	0.0466531	0.0742506	0.11536	0.0312712	0.238464	0.105317	0.0359153	0.082215	0.0321521	0.0534608	0.0569233	0	0.0077647	0.0857317	0.0873397	0.066294	0.0650676	0.1249	0.0496214	0.0618704	0.0820654	0.0717359	0.288216	0.144514	0.0463337	0.059397	0.166422	0.0096749	0.058864	0
Adcy7	0.0915596	0.2833	0.0976772	0.207602	0.252879	0.652717	0	0.14718		0.212683	0.22987	0.467901	0.136713	0.43753	0.5334	0.323464	0.516649	0.927677	0.596469	1.29833	0.929786	0.23903	0.746496	0.582747	0.334878	0.866083	0.967819	0.230886	0.92574	0.597123	0.439895	1.17547	0.50307	0.901624	1.10222	1.02267	0.786757	1.38481	0.958681	0.347593	0.665576	0.87528	0.375529	0.793612	1.23409
Adcy8	0	0	0	0	0.00076327	0	0	0.00133448		0	0	0	0	0.000461842	0	0	0.00047957	0	0	0	0	0	0.000161636	0	0	0.000374937	0	0	0.00114407	0	0	0	0	0	0	0	0	0	0	0	0	0	0	0	0
Adcy9	0.0591802	0.0984581	0.159258	0	0.0602025	0	0	0.0559044		0.0333617	0.0172189	0.0188918	0.105027	0.0291798	0.0754569	0.0136103	0.00756402	0.0338878	0.0128479	0.00447982	0.022645	0.013083	0.0167868	0.052741	0.0146151	0.0185672	0	0	0.0338229	0.0630623	0.0336107	0	0.0546625	0.0269249	0.0531796	0.0677723	0.0357213	0.119193	0.0553109	0	0	0.0429731	0.0131003	0.00803109	0
Adcyap1r1	0.17091	0.279167	0.185631	0.128259	0.112668	0	0	0.253977		0.101825	0.209238	0.0259178	0.0644695	0.112346	0.0429415	0.0428236	0.068827	0.137138	0.071761	0.0721393	0.158318	0.0333157	0.108849	0.168919	0.0501711	0.0906811	0	0.0710923	0.201015	0.140187	0.0683412	0.0621751	0.208661	0.0638052	0.142954	0.105042	0.101169	0.0645977	0.187407	0.0197671	0.164875	0.0706434	0.0643073	0.0991813	0.221361
Add1	0.794242	1.22208	0.920344	0.637094	0.922491	0.998347	0	0.829281		0.705623	0.520255	0.674481	0.391003	0.812913	0.829869	0.49782	0.645454	0.841616	0.726956	0.755065	0.837224	0.529099	0.793857	0.903661	0.572309	0.70438	0.752246	0.375319	0.836458	0.7814	0.71525	0.75123	0.86663	0.692414	0.816434	0.825122	0.667094	0.883575	0.862199	0.648142	0.77478	0.832343	0.515375	0.745578	1.00159
Add2	0	0	0	0	0.00381171	0	0	0.00788356		0.0086707	0.00214808	0.0046706	0.0644695	0.0282196	0	0.0186417	0.00987127	0.0118814	0	0.0183989	0.00687967	0.00325298	0.00908536	0	0	0.00867398	0	0	0.00768068	0	0	0	0.000872866	0.00325605	0.0376169	0.00189872	0.00119483	0	0.000695062	0	0.018148	0	0	0.0225412	0
Add3	0.938031	0.967907	0.726115	0.881442	1.35778	3.35887	1.40776	0.816379		1.17466	0.708809	1.18705	0.849886	1.298	1.03703	0.473771	0.381639	1.19827	0.59714	0.463147	0.775869	0.357216	0.447758	1.01752	0.481147	0.609317	1.07882	0.645711	1.10613	1.38484	1.4004	0.553821	1.19752	1.57058	1.45297	1.51507	1.27107	1.00826	1.08248	0.977219	0.638957	1.02923	0.695517	0.834827	0.453566
Adgb	0	0	0	0	0.000444355	0	0	0		0.00184578	0	0	0	0.000568372	0	0.000446443	0.000284847	0	0.000755447	0.0109421	0	0	0.000202023	0	0	0	0	0	0	0	0	0	0	0	0.00347635	0	0.000195756	0	0	0	0	0	0	0	0
Adgra1	0	0	0.0114254	0	0	0.153544	0	0		0.00157113	0	0.00428924	0	0.00485116	0	0.00365599	0.00740645	0.00997432	0.00131922	0.0341386	0.00613145	0.00476292	0.00711707	0	0	0.00546154	0.329654	0	0.0114809	0.0129099	0.00745157	0	0.00733643	0.0175765	0.0167426	0.0208382	0.0111696	0.0690531	0.00850158	0	0	0.0126224	0.00458641	0.00454226	0
Adgra2	0.0446095	0.142638	0	0.109631	0.219481	0.153544	0.703878	0.0962167		0.257861	0.281152	0.181855	0.193409	0.454094	0.193071	0.289526	0.288797	0.189505	0.170926	0.553155	0.25184	0.174019	0.255206	0.170006	0.135171	0.186183	0	0.0871502	0.197582	0.0946966	0.163801	0.435634	0.12587	0.183583	0.250995	0.11758	0.14102	0.16093	0.15145	0.107353	0.278566	0.140331	0.153145	0.230705	0
Adgra3	0.0752687	0.121527	0.170137	0	0.112631	0	0	0.0887093		0.109731	0.0591605	0.244248	0.105027	0.140413	0.139379	0.153306	0.162564	0.161657	0.143309	0.220438	0.210965	0.123656	0.161783	0.223595	0.146006	0.163087	0.0632511	0.151025	0.146927	0.196122	0.216356	0.402434	0.19805	0.201485	0.164369	0.19249	0.145843	0.131394	0.184719	0.24823	0.126719	0.213131	0.193031	0.145798	0.503651
Adgrb1	0	0	0	0	0.0011249	0	0	0		0	0	0	0	0.0020023	0	0	0.000293011	0.00750778	0	0	0.000848217	0	0.000529791	0	0	0.000394915	0	0	0.000667006	0.0128192	0	0	0.00143006	0	0	0.000855403	0	0	0.00106953	0	0	0	0	0.00109076	0
Adgrb2	0.137755	0.130874	0.112153	0	0.119617	0	0	0.174571		0.0631195	0.0547687	0.00212773	0	0.0115317	0.0376012	0.00961565	0.00945915	0.0197188	0.00285408	0.0139465	0.0135287	0.00867619	0.00868996	0	0	0.00527624	0	0.0077647	0.00950838	0.0132281	0.00916866	0.065033	0.00325963	0.0066494	0.0110484	0.00757978	0.0185709	0.00591453	0.00405416	0	0	0.0275336	0.0253701	0.0201605	0
Adgrb3	0	0	0	0	0	0	0	0		0.000576829	0	0	0	0	0	0.000966216	0	0	0	0	0	0	0	0	0	0	0	0	0	0	0.000581562	0	0	0	0	0	0	0	0	0	0	0	0	0	0
Adgrd1	0.766699	1.03666	1.05142	0.834578	1.18391	2.26954	0	1.16664		1.0484	0.688161	0.505611	0.433784	0.892601	1.30406	0.497118	0.26251	0.442372	0.118118	0.371053	0.186468	0.174993	0.170586	0.0608759	0.171766	0.106574	0.872958	0.2308	0.315824	0.372187	0.358739	0.249265	0.272971	0.636953	0.553823	0.643638	0.474486	0.462276	0.327937	0.0265066	0.0315395	0.416432	0.27109	0.0944932	0.194382
Adgre1	0.00222964	0	0	0	0.00504227	0	0	0.00266016		0.00174856	0.00154336	0.0429523	0	0.000915109	0	0.00100808	0.00164593	0.00356811	0	0.0113582	0.00659484	0.000528049	0.00370081	0	0	0.00174232	0	0	0.00382511	0	0.00317564	0	0.00148396	0	0.00285153	0.0015634	0	0	0.00504902	0	0	0	0	0.00145283	0
Adgre5	0.0883188	0.383598	0.0565352	0.18203	0.13506	0	0	0.100039		0.115576	0.255903	0.215646	0.0525547	0.13226	0.0837247	0.191291	0.346017	0.339293	0.204462	0.35959	0.359941	0.189577	0.275064	0.322785	0.129911	0.230887	0.0998363	0.187962	0.478154	0.371271	0.108464	0.353804	0.245027	0.214949	0.386138	0.372529	0.362216	1.09992	0.471917	0.540234	1.07882	0.789199	0.304339	0.605799	0.957218
Adgrf3	0.00531493	0	0	0	0.00318207	0	0	0.0127466		0.00257839	0	0	0	0	0	0	0.000444104	0	0	0	0	0.00038752	8.81465e-05	0	0	0	0	0	0	0	0	0	0	0	0	0	0	0	0	0	0	0	0	0	0
Adgrf4	0.0332084	0	0	0	0.015198	0	0	0.011393		0.00724186	0.00530384	0	0	0.000700889	0	0.000428852	0	0	0.00149313	0	0	0	0.000472784	0	0	0	0	0	0.00180966	0	0.00190351	0	0	0.00171701	0	0	0	0	0	0	0	0	0	0.00118393	0
Adgrf5	0.159071	0.160581	0.434858	0	0.166744	0	0	0.109531		0.124398	0.0941675	0.395184	0	0.0647741	0.0429415	0.125311	0.0622828	0.0115841	0.018128	0.030111	0.0194499	0.0133842	0.016724	0	0.0176363	0.0116422	0	0	0.010628	0	0.0131249	0	0.0107797	0.0134674	0.0143247	0.00572094	0.00771947	0.0281122	0.0186688	0	0	0.0613651	0	0.00782225	0
Adgrg1	0.05767	0.0607537	0.0727491	0.190699	0.0672324	0.192086	0	0.141471		0.0348901	0.10598	0.0392437	0	0.00294472	0	0.00225965	0.00219371	0.0104093	0.00216972	0.00361438	0.000687728	0.0036641	0.00141516	0	0	0.000159824	0	0	0.00235059	0	0.00239193	0	0.000358912	0.000736358	0.00164079	0.000796198	0.00143978	0	0.00270548	0	0	0	0.00763794	0.0017439	0
Adgrg2	0.704865	0.969571	0.125265	0.17674	0.284558	0	0	0.457311		0.59138	0.221481	0.235486	0.261512	0.159008	0.30814	0.26384	0.134123	0.134901	0.0601032	0.177018	0.0769766	0.0660701	0.101831	0.0452136	0.0833669	0.100711	0	0.0216554	0.0969535	0.0949043	0.106977	0	0.0567869	0.233572	0.362266	0.208436	0.122784	0.124607	0.0813351	0.0252889	0.0328644	0.181183	0.317473	0.0748049	0
Adgrg3	0	0	0	0	0	0	0	0		0	0	0.00186056	0	0.00229353	0	0	0	0	0	0	0	0	9.83264e-05	0	0	0	0	0	0	0	0	0	0.000205603	0	0	0	0	0	0.000469963	0	0	0	0	0	0
Adgrg6	0.0871508	0.125581	0.287528	0.0624395	0.089614	0	0.703878	0.155956		0.0247704	0.0124915	0.0770087	0	0.00581852	0	0.00568758	0.00570505	0.00138	0.0106122	0.0343979	0.00303117	0.00330385	0.0142624	0.0521556	0	0.00883896	0	0	0.00517519	0.0073205	0.00644742	0	0.00381602	0.0158438	0.0106268	0.0103233	0.00881551	0	0.00539267	0	0	0	0	0.00485421	0
Adgrl1	0.0839469	0.196506	0.0785742	0.0606767	0.184969	0.34563	0	0.0960943		0.163822	0.163345	0.105436	0.157581	0.207858	0	0.126761	0.213466	0.214624	0.236731	0.453287	0.355305	0.118823	0.296683	0.324054	0.139965	0.237243	0.252194	0.0722878	0.168846	0.10128	0.116148	0.209448	0.13752	0.0924915	0.225745	0.139172	0.0786965	0.341011	0.126086	0.0693848	0.201318	0.151706	0.138538	0.265285	0
Adgrl2	0.0114849	0.0392341	0.0101136	0.0606767	0.0601365	0	0	0.0163966		0.064662	0.0743171	0.0842805	0.210053	0.0703143	0.200453	0.0776026	0.0959275	0.0729094	0.0715201	0.128251	0.0827853	0.0758243	0.0918433	0.0828205	0.170887	0.0861184	0.254777	0	0.0504731	0.0302232	0.072735	0.140058	0.0483347	0.0259629	0.0783113	0.024677	0.0438602	0.0807926	0.0382317	0.0954398	0	0.0668545	0.0145904	0.058398	0
Adgrl3	0.00922606	0	0.0879598	0	0.0288857	0	0	0.0183016		0.0212644	0.0065601	0.0402074	0	0.00305546	0	0.00448253	0.0304413	0.0281594	0.0323809	0.0676607	0.027587	0.00781094	0.0389947	0.0227003	0.0111823	0.0440275	0.16826	0	0.0615554	0.018737	0.000623239	0	0.0438778	0.0225653	0.0401129	0.0507024	0.0639216	0.0258582	0.101755	0.0251487	0.0862412	0.0365626	0.0138649	0.0417995	0
Adgrl4	0	0	0	0	0.00323123	0	0	0.00315771		0	0	0.103859	0	0	0	0	0.0115437	0.00647597	0	0	0.00900167	0	0.00238985	0.0427846	0	0.00103152	0	0	0.00127998	0.00602747	0	0.401655	0.00208772	0	0	0.00412781	0	0	0.00774016	0	0	0.0107438	0	0.00345957	0
Adgrv1	0	0	0.0154434	0	0.00200029	0	0	0		0.00244136	0	0.0285408	0	0.0114714	0.0685453	0.010526	0.00656408	0.0171532	0.00417721	0	0.00703308	0.00591784	0.0047903	0.0866817	0.0269908	0.00748999	0	0	0.0230827	0.0426201	0.0168498	0	0.0203259	0.0790491	0.0761912	0.0648317	0.0170529	0	0.0208079	0	0.0194401	0.0186849	0.0222786	0.00192666	0
Adh1	0.00214862	0	0.00685038	0	0.016884	0	0	0.00948682		0.0163256	0.00617966	0.108481	0.105027	0.227973	0.0754569	0.0045013	0.00510827	0.0619072	0.0307103	0	0.0203293	0.0014833	0.00567471	0	0	0.00386431	0.0991631	0.0940026	0.187072	0.262936	0.464968	0.323938	0.393599	0.0487578	0.00901108	0.0748675	0.276214	0.110414	0.184576	0.0170464	0	0.0071676	0.00963387	0.00331545	0
Adh5	1.17914	0.861773	1.04199	1.04943	0.94995	0.192086	1.40776	1.06403		1.10845	0.680492	1.05289	0.954592	0.656166	0.664607	0.890979	0.81421	0.602573	0.78205	0.844231	0.623253	0.852035	0.631909	0.538628	0.752684	0.757433	0.268096	0.613333	0.683879	0.844152	0.717402	0.370942	0.762193	0.744003	0.694017	0.754812	0.845835	0.333313	0.669893	0.608169	0.779878	0.738896	0.813462	0.725596	0.996172
Adh7	0.0376121	0	0	0	0.00382185	0	0	0.00331214		0.00296726	0.00119809	0.00511881	0	0.00112746	0	0.00182071	0.00255046	0.00153078	0	0	0	0.00118638	0.000696127	0	0	0.000515222	0	0	0.0253911	0	0.009396	0	0.016136	0.0109284	0	0.00720595	0.0167734	0	0.00473975	0	0	0.0245981	0	0	0
Adhfe1	0.0314551	0	0.0847696	0.113464	0.0534065	0	0	0.0262825		0.0460264	0.0212554	0.0691133	0.149263	0.112189	0.075342	0.0179299	0.0129903	0.0553111	0.0439801	0.0196895	0.0303463	0.0366131	0.0228965	0.156826	0.0666506	0.0230159	0	0.0361745	0.0815863	0.221101	0.201358	0.0774879	0.245554	0.0385505	0.0119769	0.068069	0.0803512	0.0518454	0.121728	0	0	0	0	0.0255027	0
Adi1	0.0678812	0.0216064	0.132286	0	0.0948608	0.153544	0	0.0660494		0.060737	0.124359	0.0581463	0.0525547	0.0808838	0.0429415	0.0427798	0.0742727	0.0891328	0.0631572	0.0232502	0.0687018	0.056668	0.0789251	0.125914	0.16398	0.0476765	0.208094	0.0969877	0.0715788	0.0322029	0.0592121	0.0651576	0.0714675	0.0473364	0.0658834	0.0558706	0.0690517	0.0379954	0.0820219	0.105407	0.011108	0.0639613	0.0221164	0.0539559	0.194382
Adig	0	0	0	0	0.00328936	0	0	0.00546547		0.000345436	0.0238735	0	0	0.00576262	0	0.000341602	0.00299333	0	0	0	0	0	0.000739526	0	0	0.000537996	0	0	0.00119287	0	0	0	0	0	0.00140918	0.000161727	0	0	0.00113141	0	0	0	0	0.00164521	0
Adipoq	0	0	0	0	0.0120857	0	0	0.00731262		0	0.142581	0	0	0.0760625	0	0	0.0166084	0	0	0.0034918	0	0	0.00172861	0	0	0.0014935	0	0	0.00700773	0	0	0	0	0	0.00707502	0	0	0	0	0	0	0	0	0.00461397	0
Adipor1	1.0386	1.16034	0.597469	0.987231	1.00059	0.460631	0.703878	0.984799		1.00727	0.948125	1.52608	0.862889	0.951422	1.04428	1.12685	1.03778	1.25583	1.3018	0.797709	1.11217	1.18179	1.14963	1.13972	0.988979	1.39992	0.643608	1.01469	1.08208	1.0689	0.977936	0.874863	0.991153	1.11107	1.27922	1.07112	1.05487	0.761894	1.10038	1.11305	0.912107	1.26242	0.909257	1.21017	1.37838
Adipor2	0.25598	0.151508	0.247053	0.181046	0.217508	0.467891	0	0.186863		0.196507	0.132855	0.255936	0.0525547	0.168593	0	0.15928	0.151764	0.176085	0.19596	0.239114	0.238657	0.135337	0.186032	0.158876	0.153107	0.235961	0.221725	0.0449501	0.199374	0.199818	0.222252	0.126116	0.228603	0.167131	0.184705	0.200822	0.171779	0.106868	0.211696	0.128319	0.0941915	0.193355	0.141871	0.152365	0
Adk	1.75211	0.957789	1.47563	1.03982	0.882327	0.192086	3.51939	1.20744		1.10005	0.643091	0.900873	0.463247	0.426912	0.367587	0.794665	0.667063	0.792583	0.781495	0.631465	0.6272	0.697357	0.471439	0.648262	0.864	0.914345	0.602888	1.39185	0.913033	0.993395	0.901684	0.896497	1.10704	1.03513	0.791636	0.957482	1.19588	0.519154	0.995702	1.83678	1.32479	0.926318	1.39642	1.13694	2.07642
Adm	0.0266239	0.0920523	0.193719	0	0.0718639	1.08932	0	0.0489886		0.090627	0.109297	0.464517	0.124799	0.477082	0.876798	0.25665	0.200447	0.547491	1.01843	0.525213	0.734818	0.41702	0.354625	2.10135	1.64316	0.40894	4.24665	1.82021	0.972252	3.29082	2.03035	1.24723	3.02867	0.436477	0.0961251	0.629283	2.50434	0.336819	2.32987	0.584692	0.791095	0.46167	0.40052	0.18029	0.388765
Adm2	0.00399153	0	0	0	0	0	0	0		0.00333199	0.00220711	0	0	0	0	0.0024839	0.00942575	0	0	0.0105771	0	0	0.00178267	0	0	0.00143638	0	0.0147271	0.00103073	0	0	0	0	0	0	0	0	0	0	0	0.0250344	0	0	0.000326343	0
Adnp	0.0127962	0	0.0187646	0	0.0136396	0	0	0.0215101		0.00735254	0.0188867	0.00320729	0.0722439	0.0177382	0	0.00452509	0.0122739	0.0188647	0.00223884	0.00398447	0.0129739	0.00443878	0.0116025	0.0212979	0	0.00807818	0	0	0.0136881	0	0.00573756	0	0.00645411	0.00399644	0.0171688	0.00889544	0.0065556	0	0.0132382	0.0215731	0.0593896	0.00577133	0	0.0146203	0
Adnp2	0.0345116	0.158395	0.0816979	0.154816	0.053746	0	0	0.0692657		0.0705803	0.0562718	0.0613838	0	0.0586658	0.031522	0.0642823	0.0747343	0.0423446	0.0634468	0.105694	0.0702532	0.0351702	0.0752794	0.0484402	0.105904	0.0732738	0.158846	0.0650357	0.059725	0.0110528	0.0631791	0.01469	0.0737653	0.0665039	0.0617077	0.0764104	0.0512004	0.0381171	0.0723608	0.0490187	0.13542	0.0789671	0.0848476	0.0626405	0
Ado	0.431174	0.701229	0.581292	0.245762	0.32942	0.192086	0	0.451854		0.383153	0.247658	0.349498	0.302152	0.346114	0.228279	0.355683	0.371236	0.58185	0.418377	0.289334	0.401273	0.367142	0.350958	0.532346	0.309217	0.345037	0.637407	0.454852	0.409984	0.380313	0.281212	0.118419	0.461925	0.374216	0.444135	0.505979	0.393333	0.184439	0.550626	0.650592	0.435414	0.541958	0.406304	0.484757	0.415744
Adora1	0.00697533	0.0253212	0.0110454	0	0.00370504	0	0	0.0196518		0.00108699	0.00656779	0.00583752	0	0.00190244	0.0754569	0.00112889	0.00500139	0.0332387	0	0	0.0102426	0	0.00225045	0.0703476	0.00465157	0.00214343	0.0632511	0	0.0420714	0.0635293	0.00144191	0.0182256	0.0204566	0.0214427	0.0207152	0.0368547	0.0262302	0.0218347	0.0849209	0	0.0364933	0	0	0.0134925	0
Adora2a	0	0.0196919	0	0.0527869	0.0188255	0	0	0.00910165		0.00584892	0.00395421	0.048189	0	0.00790863	0	0.0102784	0.011264	0.0392274	0.0370143	0.0341076	0.0496786	0.0170792	0.0391863	0.0476649	0.0890253	0.0470267	0.0632511	0	0.0397282	0.0340471	0.0242558	0.0389479	0.0459814	0.0170679	0.0229389	0.0355564	0.0276645	0.0730896	0.0699615	0.0627118	0.0212168	0.0709661	0	0.0317604	0
Adora2b	0.3482	0.369947	0.0734266	1.0543	0.396182	0.153544	1.40776	0.260762		0.499884	0.254148	0.146686	0.700533	0.307469	0.092746	0.421063	0.209587	0.12349	0.17442	0.0968403	0.0719879	0.229979	0.108864	0.0212979	0.324603	0.0964303	0.090763	0.134605	0.0699145	0.0190829	0.141628	0.11092	0.0210465	0.130564	0.115953	0.066242	0.12049	0.177921	0.0390223	0.0879078	0.0597477	0.0351557	0.169674	0.0660175	0.359066
Adpgk	0.244191	0.195032	0.201317	0.177213	0.197232	0.314347	0	0.194894		0.219383	0.126413	0.142719	0.266287	0.128282	0.0867656	0.282938	0.238883	0.111763	0.155747	0.37441	0.139758	0.226025	0.17376	0.0728579	0.107679	0.209745	0.16826	0.381542	0.160611	0.172667	0.11126	0.146557	0.136099	0.15474	0.188739	0.149029	0.19434	0.194496	0.157772	0.2656	0.245837	0.112192	0.265847	0.251865	0.359066
Adprh	0.409625	0.908743	0.358137	0.373409	0.573233	0.499174	0	0.406008		0.673895	0.64153	1.24055	0.861793	1.41245	1.63596	1.34061	1.49387	1.24663	1.40924	1.21943	1.16464	1.21779	1.13872	1.57156	0.985982	1.27431	1.08571	1.15387	1.52675	1.48873	1.15978	1.42438	1.2355	1.60194	1.59148	1.55701	1.61319	1.51142	1.43702	2.55824	3.26507	2.33074	2.09238	2.08073	1.1393
Adprhl1	0.0124906	0	0.0262523	0	0	0	0	0.0017785		0.00475655	0.00403361	0.0649336	0	0.00209375	0.519602	0.00473348	0.000979745	0.0412467	0.0274253	0.0308941	0.0268787	0.0250789	0.00286271	0.0680317	0.022472	0.00234025	0.210071	0.00786807	0.00190545	0.190558	0.00285331	0	0.015797	0.00313705	0.00125876	0.0145916	0.00633639	0	0.0319105	0	0	0.0567009	0.014584	0.00100714	1.79258
Adprhl2	0.358789	0.327647	0.366051	0.442206	0.320273	0.307088	0	0.330547		0.328586	0.273755	0.419695	0.367634	0.317511	0.378455	0.305439	0.325882	0.437545	0.419735	0.298205	0.33403	0.330899	0.310861	0.398713	0.223986	0.317665	0.179052	0.312623	0.407538	0.501014	0.327128	0.352686	0.413615	0.384431	0.43644	0.429259	0.329076	0.344196	0.426863	0.346376	0.346453	0.409554	0.220138	0.318896	0
Adprm	0.112531	0.15267	0.125961	0.159356	0.14511	0	0	0.100966		0.1109	0.174824	0.123564	0.0644695	0.132322	0.0964334	0.128528	0.119152	0.162948	0.130906	0.167763	0.167797	0.137932	0.144179	0.149475	0.191716	0.161516	0	0.308121	0.169706	0.145265	0.151859	0.0524682	0.194966	0.173379	0.164397	0.189384	0.159598	0.137075	0.197795	0.123574	0.136908	0.17779	0.10621	0.133535	0
Adra1a	0	0	0	0	0	0	0	0		0	0	0	0	0	0	0	0	0	0	0	0.00131061	0	7.55331e-05	0.0315736	0	0	0.336519	0	0.00335573	0.072352	0	0	0.0322773	0	0	0.000319106	0	0	0.00471219	0	0	0	0	0	0
Adra1b	0	0	0.0123488	0	0.0189401	0.314347	0	0		0.00263996	0	0.0045726	0	0.0310517	0	0.000974886	0.00113455	0.00231598	0	0.0103358	0.00413566	0.00213165	0.000955652	0	0	0.000823756	0	0	0.00522349	0	0.0108016	0	0.00693843	0.0224639	0.00653993	0.0102553	0.0141765	0	0.000989963	0	0	0	0.0351548	0	0
Adra2a	0	0	0	0	0.00103359	0	0	0		0.000692055	0.00125971	0	0	0.000726051	0	0.00238845	0.00542104	0	0.00197936	0	0	0.000985927	0.00448892	0	0	0.000824227	0	0.0152448	0.000971289	0	0.00072583	0	0	0.000843681	0	0	0	0	0	0	0	0	0	0	0
Adra2b	0	0	0	0	0.000324794	0	0	0		9.91171e-05	0	0	0	0.0032692	0	0.00093928	0.00112195	0.0121388	0	0	0.010179	0.00149686	0.00363144	0	0	0.00303771	0	0	0.00284566	0	0.005054	0	0.00533684	0.00158854	0	0.00305912	0	0	0.00688503	0	0	0	0	0.00106572	0
Adra2c	0	0	0	0	0	0	0	0		0	0	0.00654941	0	0	0	0	0	0	0	0	0	0	0	0	0	0	0	0	0	0	0	0	0.00191104	0	0	0.000440017	0	0	0	0	0	0	0	0	0
Adrb1	0.0376426	0.0476417	0.0186789	0	0.00985646	0	0	0.0173362		0.0191291	0.00637819	0.048671	0	0.000858002	0	0.00180395	0.0014263	0	0	0	0.000701347	0.00077423	0.000272342	0	0	0.00017469	0	0	0.00443601	0	0.0074986	0	0.0023213	0.000232655	0.00244822	0.000136384	0.000821499	0	0.0016521	0	0	0	0	0	0
Adrb2	0.0320525	0.117334	0.0838498	0	0.00805208	0	0	0.0181976		0.0155452	0.042626	0.132981	0	0.00186108	0	0.0195126	0.0298683	0.0650721	0.00604777	0.0475513	0.00885366	0.00294293	0.00547172	0	0	0.00590914	0	0	0.0336614	0.0193943	0.0497667	0.055437	0.0708261	0.0166841	0.0257037	0.0534076	0.0416913	0	0.0779922	0.28973	0.382895	0.288185	0.135558	0.151399	0.226783
Adrb3	0	0.0195422	0	0	0.00221553	0	0	0		0.000658096	0.00140432	0	0	0.00855682	0	0.00331098	0.00323664	0.0339189	0.00564214	0.00104218	0.00747199	0.00593013	0.00358622	0	0	0.00464519	0	0	0.00417994	0	0.00677477	0	0.00135003	0.0188152	0.00350703	0.00126711	0.00402142	0	0.000112344	0	0	0	0	0.000971408	0
Adrm1	1.39844	0.94309	0.879164	0.779312	0.809564	0.467891	0.703878	0.907568		1.21162	0.657516	1.24342	0.923384	0.636355	0.568373	1.3708	1.063	1.11777	1.09784	0.947659	0.756867	1.10598	0.680572	0.873984	1.20569	1.11022	0.370286	1.30533	0.877565	0.952794	0.913658	0.478672	0.812436	1.16934	0.995671	0.963562	1.13482	0.865817	0.864328	1.63337	1.39264	1.29238	1.42794	1.30504	2.24077
Adsl	0.250665	0.198305	0.253121	0.192138	0.212802	0.34563	0.703878	0.191704		0.266023	0.41589	0.336655	0.306292	0.167458	0.440274	0.235344	0.242402	0.215554	0.178405	0.270486	0.171578	0.277378	0.156178	0.20725	0.185882	0.15342	0.156779	0.167505	0.201692	0.322286	0.214104	0.273728	0.236153	0.245365	0.166157	0.247585	0.240893	0.202191	0.22738	0.401085	0.25473	0.218514	0.228014	0.222693	0
Adss	0.795535	0.611944	0.50939	0.438153	0.567972	0.153544	0	0.613692		0.528673	0.427241	0.474063	0.677882	0.349857	0.151843	0.500133	0.499277	0.500432	0.390858	0.315135	0.339464	0.452375	0.344506	0.233383	0.401828	0.378212	0.340483	0.365804	0.391141	0.246611	0.343893	0.254089	0.332458	0.432784	0.326087	0.345301	0.429291	0.387367	0.343105	0.618358	0.771133	0.489261	0.500878	0.502803	0.421165
Adssl1	0.0158978	0	0.0141471	0.0527869	0.0298404	0	0	0.00990402		0.0265837	0.0161715	0.00238519	0	0.00150728	0	0.00389106	0.00376691	0.0111956	0	0.00629228	0.00561325	0.00978855	0.00387265	0	0	0.00283426	0	0.0060885	0.00355351	0.223877	0.0137446	0	0.00558537	0	0.00300711	0.00255262	0.00410579	0	0.0062436	0.0187427	0	0	0	0.00167451	0.221361
Adtrp	0.0213722	0	0	0	0.00796756	0	0	0.0016188		0.0084586	0.0106864	0	0	0	0	0.00267448	0.000925852	0	0	0	0	0.0019052	0.000457907	0	0	0.000146907	0	0	0.000459605	0	0	0	0	0.000983093	0.00255851	0	0.00104587	0.00591453	0	0	0	0	0	0.00348505	0
Aebp1	5.84817	5.35286	14.2667	6.42762	6.76962	6.92058	7.74266	8.49405		3.91612	3.29979	2.06126	3.8729	9.49377	2.50176	2.94361	3.89433	2.03763	3.79629	6.37423	3.76776	3.27315	4.73056	2.24873	3.40728	3.84333	2.10518	2.47442	2.55559	2.13884	3.82352	3.77702	2.07326	2.02241	2.27433	1.79871	2.92585	3.3108	1.99874	1.07279	2.24287	2.1002	1.83678	2.47212	1.19327
Aebp2	0.205363	0.190996	0.377285	0	0.228563	0	0	0.292714		0.223974	0.182759	0.271615	0	0.277158	0.282822	0.230092	0.218039	0.202813	0.158356	0.29814	0.205582	0.125729	0.178976	0.235743	0.146655	0.165211	0.423037	0.243951	0.180797	0.106389	0.145709	0.355121	0.145197	0.141404	0.2583	0.172661	0.130281	0.0977829	0.186826	0.275382	0.124956	0.243881	0.210439	0.203706	0
Aen	0.373418	0.10579	0.17369	0.0624395	0.183309	0	1.40776	0.153227		0.282503	0.27026	0.612796	0.234048	0.215792	0.253316	0.489127	0.450203	0.459344	0.298124	0.322502	0.247001	0.392932	0.275991	0.316319	0.413381	0.30981	0.256849	0.528901	0.312362	0.209995	0.202046	0.275199	0.21193	0.313203	0.353396	0.32689	0.306325	0.28809	0.320835	0.573107	0.257845	0.428371	0.306238	0.343585	1.39607
Aes	3.81927	4.10978	3.65441	2.6692	3.22262	7.5836	2.81551	4.03798		2.24071	2.14197	3.3743	1.88521	2.51141	2.88324	1.5933	1.9819	4.03107	2.34511	0.930307	2.68799	2.20101	2.13053	3.24808	2.33857	1.64075	4.03275	3.20368	3.58389	4.36718	2.37317	1.56736	3.60084	3.44736	3.85091	4.66048	3.56475	2.54064	4.41008	3.55371	3.43503	4.25794	3.04546	2.65814	3.542
AF529169	0	0	0	0	0	0	0	0		0	0	0	0	0	0	0	0	0	0	0	0.00203022	0	0	0	0	0	0	0	0	0	0	0	0.00115953	0	0	0.00108929	0	0	0.000414046	0	0	0	0	0	0
Afap1	0.255993	0.281583	0.508246	0.40249	0.373926	0	0	0.418608		0.248853	0.297151	0.468803	0.257693	0.433394	0.384855	0.290597	0.372676	0.457527	0.363649	0.508023	0.453127	0.292419	0.452254	0.225678	0.260936	0.406133	0.208094	0.193864	0.450863	0.440607	0.285036	0.14868	0.333264	0.407962	0.547207	0.4658	0.407857	0.812738	0.477408	0.593292	0.683952	0.716619	0.279788	0.423467	0.503651
Afap1l1	0.0011057	0.0195422	0.0119239	0	0.00407588	0	0	0		0.00336639	0.00893474	0.314895	0	0	0.053492	0.0033492	0.00393701	0.0438175	0.00135131	0.0270811	0.00503594	0.00619391	0.00528822	0	0	0.00219792	0	0.0141444	0.0036996	0	0.00438421	0	0.00462055	0.00221734	0.0011157	0.00163089	0.00198943	0	0.00823729	0	0.018148	0.0115427	0	0.0035995	0
Afap1l2	0.258134	0.23539	0.247865	0	0.258972	2.07746	0	0.305884		0.22055	0.106382	0.180144	0	0.0554127	0.0991573	0.0228987	0.0163712	0.127775	0.0588126	0.0106663	0.0369849	0.0104241	0.0171927	0.0298608	0.0312142	0.0181605	0	0.0139152	0.0679727	0.0125651	0.0474201	0	0.0505292	0.0612572	0.0781728	0.0673473	0.0714128	0.136171	0.0567581	0.0197153	0.0194401	0.0645841	0.0209431	0.0359208	0.503651
Afdn	0.53899	0.792836	0.481889	0.229369	0.253526	0.153544	0.703878	0.394222		0.245744	0.293575	0.36512	0	0.168432	0.47914	0.120247	0.162647	0.349848	0.131087	0.258661	0.238422	0.105902	0.205056	0.173514	0.129629	0.214538	0.16826	0.218558	0.246457	0.284296	0.294147	0.175605	0.276753	0.213296	0.273728	0.289496	0.221988	0.175515	0.255807	0.300548	0.162992	0.306937	0.190635	0.205241	0.957218
Aff1	0.113791	0.078142	0.186963	0.277932	0.1089	0	0	0.103757		0.120838	0.0767234	0.151447	0.35108	0.161999	0.127828	0.134948	0.0990364	0.135761	0.0715759	0.185693	0.0903415	0.0651524	0.0808783	0.0953518	0.0198621	0.0694968	0	0.106478	0.10587	0.162848	0.107704	0.213943	0.0983491	0.0829936	0.0831166	0.0910958	0.0737875	0.0851724	0.0990912	0.082559	0.0137264	0.0910925	0.0550527	0.0798834	0
Aff2	0	0.0275956	0	0	0.00479299	0	0	0.00633795		0.00174369	0.00186751	0.00254628	0	0.0151022	0	0.00233168	0.00245828	0.00150778	0.00221934	0.000862632	0.0019356	0.001651	0.00397026	0	0	0.00352813	0	0	0.0152947	0	0.0209009	0.0484395	0.0121674	0.00563388	0.00564778	0.00739571	0.00455606	0	0.00167401	0	0	0.0329853	0	0.0057293	0
Aff3	0.0298816	0.0655226	0.0385442	0	0.0183733	0.460631	0	0.0430264		0.0150626	0.0110398	0.128099	0.0722439	0.0671977	0.232992	0.0346828	0.0576581	0.290622	0.0951734	0.0907408	0.237154	0.0394033	0.14779	0.0688832	0.0791749	0.15583	0.186804	0.165152	0.254617	0.333699	0.232162	0.107883	0.276621	0.264644	0.215451	0.382531	0.271331	0.433157	0.274608	0.0499052	0.117196	0.206505	0.161736	0.124883	0.194382
Aff4	0.451361	0.493452	0.616511	0.524104	0.591694	0.34563	0.703878	0.600377		0.44505	0.340832	0.471272	0.149263	0.628661	0.637142	0.35116	0.413532	0.555052	0.472298	0.913604	0.52094	0.283101	0.521204	0.577131	0.405678	0.481548	0.409052	0.165364	0.542339	0.361731	0.493759	0.832462	0.420076	0.385085	0.579647	0.436427	0.393959	0.661094	0.46156	0.278944	0.324639	0.294466	0.306225	0.331904	0
Afg1l	0.0527243	0.0806438	0.0416598	0	0.0321722	0.467891	0	0.0289011		0.0324139	0.030626	0.0870586	0	0.0396758	0.0685453	0.0272971	0.0277466	0.056437	0.0269384	0.0480841	0.0262861	0.025117	0.0248612	0.12627	0.0303417	0.0210406	0	0.0172449	0.0336041	0.0842447	0.021207	0	0.0385735	0.0249051	0.0649491	0.0446012	0.0316065	0.0159207	0.0428788	0.0633627	0.0152835	0	0.0333655	0.0182972	0.221361
Afg3l1	0.44881	0.464011	0.412034	0.20831	0.453552	0.192086	0	0.429828		0.51969	0.431415	0.456133	0.532484	0.374655	0.522233	0.558263	0.588968	0.45115	0.564875	0.753653	0.370271	0.571096	0.411907	0.759097	0.561823	0.470552	0.224777	0.473461	0.473042	0.26279	0.393618	0.422661	0.393524	0.513454	0.438528	0.429178	0.489959	0.51416	0.411262	0.767088	0.450918	0.503501	0.479638	0.49126	0.747831
Afg3l2	0.272666	0.233527	0.21224	0.18463	0.202886	0.192086	0	0.176853		0.241358	0.157979	0.248322	0.0525547	0.151063	0.210093	0.201437	0.185279	0.167125	0.176427	0.238563	0.136156	0.177403	0.137732	0.244044	0.232303	0.166465	0.270719	0.132572	0.152574	0.24399	0.135517	0.11923	0.161604	0.16131	0.142595	0.170629	0.186291	0.203753	0.163724	0.165321	0.137157	0.159238	0.120993	0.150806	0
Afmid	0.0140114	0	0.0130002	0.0624395	0.00966225	0	0	0.0106519		0.0127488	0.0129301	0	0	0.00889885	0	0.00596779	0.00671284	0.00174865	0.00342401	0.00255971	0.00689473	0.00808536	0.00556668	0	0	0.00342074	0	0.00927334	0.00401896	0	0.00439327	0	0.00215282	0.00259523	0.0023828	0.00178637	0.00499632	0	0.0031348	0.0340785	0.0165886	0	0	0.0134424	0
Afp	0.00509798	0	0	0	0.00258394	0	0	0		0.00307662	0.00206557	0	0	0	0	0.00696153	0.00344305	0	0.000583031	0	0	0.00341866	0.000418076	0	0	0.000119557	0	0	0.00102208	0	0.000715574	0	0	0.000584472	0	0	0	0	0	0	0	0	0	0	0
Aftph	0.211214	0.471311	0.245574	0.297712	0.245588	0.153544	0	0.23889		0.205642	0.165438	0.211678	0.261512	0.248173	0.0754569	0.252791	0.179109	0.231672	0.0974764	0.123339	0.221571	0.148345	0.14496	0.196382	0.167465	0.151651	0.157762	0.435186	0.192524	0.160135	0.241335	0.222392	0.194895	0.202001	0.202257	0.220756	0.229466	0.498272	0.209852	0.227553	0.117186	0.261412	0.245388	0.163205	0
Aga	0.9457	0.625929	0.749085	1.55941	0.718363	0.852063	1.40776	0.721346		0.886959	0.418691	0.711894	1.46788	0.802681	0.289694	0.8992	0.726064	0.610086	1.14438	0.833294	0.752478	0.97172	0.82105	0.693926	1.32726	1.35877	1.13918	0.772924	0.898032	0.949084	1.32475	0.521255	0.893624	1.35504	1.04161	0.922343	1.16856	0.517672	0.829246	1.21334	0.418147	0.664075	1.22743	1.02388	0.553449
Agap1	0.254052	0.3053	0.880685	0.144021	0.231164	0	0	0.347113		0.211491	0.21789	0.4415	0	0.247881	0.115533	0.137503	0.124207	0.43282	0.0495973	0.148533	0.176313	0.0455008	0.0898748	0.418041	0.0375208	0.0852911	0.390806	0.0297261	0.203276	0.355832	0.115209	0.01469	0.307046	0.167034	0.254931	0.495471	0.254728	0.63678	0.57608	0.315288	0.210461	0.333313	0.125902	0.175395	0
Agap2	0	0	0	0	0.000464118	0	0	0		0	0.00190209	0.00503555	0	0	0	0	0	0.0050142	0	0	0.00167563	0	0.000606281	0	0	0.000271074	0	0	0.0012696	0	0	0	0.00206654	0	0	0.00094036	0	0	0.00194521	0	0.0095584	0.0181855	0	0.00434649	0
Agap3	0.121126	0.155789	0.199906	0.143121	0.104412	0	0	0.127782		0.0638929	0.0940729	0.192311	0	0.164433	0.306447	0.0802156	0.133423	0.178833	0.0933741	0.135616	0.203111	0.0791184	0.15082	0.26958	0.0419117	0.0953567	0	0.0652665	0.14661	0.286344	0.0831689	0.0801582	0.149059	0.0814367	0.154987	0.183538	0.111043	0.392819	0.210836	0.0979215	0.0323639	0.232545	0.112297	0.103912	0
Agbl2	0.00836164	0.0303351	0.00217805	0	0.0130922	0	0	0.00917719		0.00897109	0.00880685	0.00493976	0	0.0077494	0	0.0101989	0.0231067	0.00432981	0.00776558	0.00984729	0.00840145	0.0124928	0.0100748	0	0.00551578	0.00996894	0.123553	0	0.00827729	0	0.00485702	0	0.00767903	0.00328759	0.00331567	0.00169915	0.0103156	0	0.00509215	0.105808	0.059484	0.039691	0.03456	0.050947	0
Agbl3	0.0399114	0.0914169	0.141043	0.113464	0.0714437	0	0	0.0694537		0.0643926	0.0348888	0.0903392	0	0.0715419	0.145335	0.0526449	0.0602212	0.0700656	0.0889078	0.0476092	0.0685514	0.0599356	0.0702786	0.0775738	0.0506558	0.0715129	0.090763	0.0988942	0.0659819	0.0818983	0.126103	0.0391875	0.0960325	0.0776055	0.0601164	0.0712803	0.0720908	0.0977087	0.0794359	0.0497245	0.0358879	0.0562148	0.055508	0.0577321	0
Agbl5	0.0220468	0.0196919	0.0433788	0	0.022807	0	0	0.020582		0.0163311	0.00486887	0.0240546	0	0.0211865	0	0.0109079	0.0151508	0.0082306	0.00608295	0.0117491	0.0196552	0.0129907	0.0183509	0	0	0.0158643	0	0.015872	0.00830123	0	0.00843934	0.0691358	0.00714269	0.00915818	0.00475127	0.0093208	0	0.0281122	0.00790089	0	0	0.00556654	0	0.0176748	0
Ager	0.00781696	0	0.0170765	0	0.0264374	0	0	0.00702906		0.0185135	0.0104276	0.00562707	0	0.018033	0	0.00667801	0.016238	0.0161162	0.022215	0.0261759	0.0138973	0.00698641	0.0162251	0	0.0290963	0.0216538	0	0.0124434	0.0120658	0.011968	0.0111908	0	0.00372127	0.0103684	0.0146995	0.00467104	0.0101723	0.0487831	0.00457942	0	0.0157642	0.0463222	0.00641492	0.0208262	0
Agfg1	0.563015	0.810164	0.3869	0.138043	0.356085	0	0	0.57586		0.323311	0.263634	0.315109	0.217053	0.293232	0.334256	0.247826	0.308355	0.27224	0.219415	0.197879	0.281053	0.185955	0.245447	0.228899	0.17012	0.221266	0	0.123365	0.284234	0.173812	0.176626	0.126314	0.185585	0.243077	0.405942	0.261245	0.219872	0.430647	0.261533	0.390821	0.330234	0.363058	0.282811	0.283858	0.226783
Agfg2	0.191769	0.117376	0.249926	0.121353	0.14505	0.192086	0	0.211404		0.156401	0.110925	0.178584	0.136713	0.104281	0.336517	0.0780567	0.100806	0.169472	0.0952224	0.0608755	0.117063	0.0511324	0.0926294	0.219984	0.0809263	0.122418	0.360114	0.295925	0.197923	0.230643	0.16582	0.0699272	0.324688	0.138712	0.185518	0.312469	0.150364	0.0369895	0.308172	0.326951	0.128797	0.208915	0.135666	0.199637	0
Aggf1	0.386195	0.349942	0.381839	0.354556	0.314334	0.153544	0	0.349882		0.321478	0.386764	0.407773	0.406	0.363167	0.331438	0.311823	0.360635	0.341073	0.350106	0.255348	0.340399	0.295779	0.356594	0.342914	0.210684	0.350576	0.471252	0.271696	0.373108	0.367304	0.34954	0.269514	0.307302	0.331369	0.390154	0.366296	0.286836	0.237223	0.371804	0.495182	0.359758	0.291707	0.210548	0.323627	0
Agk	0.189889	0.222117	0.0904126	0	0.111292	0	0	0.117243		0.132581	0.0875514	0.389386	0.0525547	0.134337	0.177236	0.141027	0.144209	0.246065	0.20411	0.307159	0.190249	0.14365	0.154402	0.148643	0.283307	0.253285	0.0954153	0.128991	0.228133	0.308411	0.183699	0.313354	0.303183	0.246152	0.177444	0.28152	0.265744	0.0991939	0.238889	0.29646	0.195951	0.258594	0.271081	0.235714	0
Agl	0.0802848	0.071944	0.18781	0.181046	0.161471	0.34563	0	0.0879678		0.146249	0.110406	0.130962	0.0722439	0.164715	0.0850139	0.143948	0.203035	0.0869543	0.0898061	0.18725	0.12901	0.11696	0.156224	0.133079	0.118554	0.133617	0.0954153	0.0714623	0.128508	0.1723	0.129409	0.105906	0.140463	0.0984917	0.102819	0.125995	0.123704	0.591665	0.162636	0.110894	0.0533163	0.095621	0.0973706	0.113453	0
Agmat	0.338009	0.3213	0.113545	0	0.068515	0	0.703878	0.337704		0.0400916	0.0473639	0	0	0	0	0.00421992	0.000836682	0	0.00142113	0	0	0.0039362	0.000759913	0	0	0.000122921	0	0	0.00257212	0	0.00266191	0	0.000959059	0	0.00196108	0.000163183	0.00188631	0	0	0	0	0	0	0.00119206	0
Agmo	0.00585797	0.102252	0.0192446	0	0.00843186	0	0	0.00965681		0.00760956	0.0215579	0.0591122	0	0.072428	0.0920567	0.0250583	0.0594806	0.168847	0.0675057	0.118755	0.11348	0.0328468	0.0675188	0.230402	0.02455	0.0990102	0.643843	0.134327	0.213223	0.295378	0.156854	0.339772	0.2237	0.178085	0.122723	0.21147	0.200001	0.526795	0.217511	0.201722	0.232438	0.213333	0.167226	0.135883	0.503651
Ago1	0.0780409	0.0766322	0.162986	0.0489541	0.110994	0.314347	0	0.109846		0.0604963	0.0624591	0.105092	0.0722439	0.102733	0.216481	0.0376278	0.0594725	0.0995002	0.0754637	0.089755	0.114327	0.0497898	0.108576	0.155521	0.0577371	0.0843796	0.0865179	0.072128	0.12343	0.125301	0.0710478	0.169464	0.125053	0.0824884	0.093948	0.122185	0.0831983	0.331563	0.145652	0.0945432	0.0538778	0.0725902	0.081497	0.0655565	0
Ago2	0.195812	0.241332	0.488589	0.207602	0.203214	0.153544	0.703878	0.210583		0.211246	0.26493	0.330683	0.149263	0.315505	0.490415	0.305556	0.305584	0.526797	0.233776	0.396429	0.327968	0.178652	0.276129	0.313641	0.175743	0.251848	0.304582	0.10398	0.336355	0.35888	0.237181	0.27488	0.304196	0.297774	0.443666	0.37506	0.255172	0.490638	0.403524	0.323079	0.438068	0.471056	0.315172	0.404919	0.730435
Ago3	0.108841	0.093092	0.144342	0	0.130835	0.153544	0	0.138608		0.103224	0.092008	0.145172	0.0644695	0.128632	0.195067	0.103997	0.117638	0.134788	0.0996154	0.225776	0.136017	0.0837377	0.125912	0.179145	0.0792964	0.124185	0.0845409	0.0383105	0.136776	0.117615	0.101437	0.150929	0.129417	0.124891	0.147521	0.138572	0.107162	0.155347	0.159304	0.0462219	0.0233059	0.22262	0.0962823	0.114276	0
Ago4	0.0104201	0.079647	0.0437976	0	0.0316379	0	0	0.0198541		0.0142883	0.0177583	0.0245131	0.0525547	0.0330986	0	0.0140512	0.0212662	0.0811382	0.0385457	0.084829	0.0403167	0.0197892	0.049278	0.0816204	0.0522898	0.045696	0.493298	0	0.0493428	0.0419585	0.0598839	0	0.0576524	0.0288265	0.0414542	0.0592501	0.0454583	0.0456499	0.0571902	0	0.0233059	0.0420338	0	0.0381369	0
Agpat1	0.0856971	0.13283	0.106825	0	0.114221	0	0	0.133939		0.0909587	0.0547324	0.196642	0	0.102953	0.113058	0.0948123	0.128302	0.1983	0.0858893	0.0586887	0.11487	0.0786596	0.11123	0.160429	0.126337	0.0924103	0.108751	0.194472	0.0911969	0.0799119	0.0642633	0.522368	0.114413	0.0689128	0.111694	0.109765	0.047823	0.107762	0.100713	0.0943023	0.137145	0.107111	0.107082	0.135301	0.221361
Agpat2	0.330894	0.438028	0.253483	0.528939	0.287916	0	0	0.346564		0.282725	0.215371	0.429969	0.169496	0.267289	0.293264	0.251618	0.271963	0.276293	0.367072	0.171251	0.313276	0.339286	0.344081	0.189684	0.361767	0.319901	0.367486	0.427035	0.342078	0.33344	0.301979	0.287589	0.314419	0.298627	0.292454	0.283633	0.285827	0.230975	0.293557	0.201518	0.105406	0.264171	0.10821	0.227075	0.194382
Agpat3	0.301222	0.468199	0.399495	0.332483	0.355403	0.967064	0	0.405478		0.248419	0.338806	0.293548	0.463329	0.361922	0.342077	0.238041	0.344104	0.388369	0.322622	0.210142	0.390546	0.337412	0.386854	0.32521	0.293581	0.256255	0.198999	0.230186	0.369999	0.360247	0.220318	0.23997	0.264641	0.252699	0.410781	0.294804	0.295074	0.416725	0.343973	0.341999	0.527421	0.348794	0.289124	0.361266	0
Agpat4	0.267917	0.341638	0.1715	0.278954	0.362726	0.34563	0	0.203667		0.44826	0.403481	0.519363	1.12639	0.628565	0.335793	0.874427	0.613864	0.802545	0.500069	0.384104	0.574748	0.581162	0.402845	0.336404	0.592908	0.420995	0.820794	0.395059	0.559411	0.439342	0.632565	0.394158	0.526858	0.760752	0.771634	0.703001	0.605261	0.568309	0.562237	0.412048	0.276088	0.532687	0.769107	0.402361	0.194382
Agpat5	0.319585	0.279527	0.29528	0.123116	0.224671	0.192086	0	0.250754		0.339151	0.219938	0.286304	0.105109	0.205347	0.204588	0.437108	0.352848	0.315488	0.227348	0.183121	0.221676	0.360186	0.222721	0.164675	0.353373	0.254896	0.448525	0.142165	0.215298	0.188495	0.209062	0.225582	0.166274	0.200803	0.211604	0.190277	0.203594	0.211957	0.192666	0.17858	0.272882	0.266113	0.322066	0.245265	0.359066
Agps	0.161785	0.273918	0.1448	0.0749991	0.108008	0	0	0.0924701		0.160352	0.154181	0.183849	0.117024	0.15127	0.102679	0.207161	0.195089	0.123659	0.125506	0.16598	0.159954	0.15878	0.161309	0.166593	0.176356	0.163557	0.0680828	0.0812518	0.130276	0.155617	0.125193	0.261994	0.124797	0.133292	0.158041	0.1271	0.121443	0.145981	0.139655	0.189094	0.161698	0.188715	0.216394	0.186137	0
Agr2	0.000724562	0	0	0	0.00809023	0	0	0.00367664		0.00529208	0.00364267	0	0	0.00663319	0	0.000551744	0.000696104	0	0.000854964	0	0	0	8.0672e-05	0	0	0	0	0	4.44048e-05	0	0.00210508	0	0	0.000477196	0	0	0	0	0	0	0	0	0	0	0
Agrn	0.336108	0.354814	0.521437	0.334246	0.294322	0	0	0.47887		0.1357	0.122358	0.131999	0	0.200947	0.064801	0.0641041	0.123627	0.0751584	0.121299	0.370271	0.168293	0.0642475	0.183969	0.1126	0.0296669	0.146405	0.231581	0.0691876	0.0982438	0.0973894	0.0865153	0.286519	0.0765187	0.0570903	0.114658	0.0644772	0.0497864	0.203297	0.106226	0.0495983	0.0431533	0.0728134	0.070131	0.103656	0
Agrp	0.00843839	0	0.0161293	0	0.00314401	0	0	0.00207611		0.00588946	0.00289159	0.00165529	0	0.00460359	0	0.00202355	0.00212016	0	0.00304508	0	0.00423515	0.00391323	0.00305056	0	0	0.00379267	0	0	0.00262284	0	0.00229539	0	0.00252989	0.00400625	0.0045971	0.00270096	0.00556886	0	0.00208108	0	0	0.0164236	0.0167679	0.00451435	0
Agt	0	0	0	0	0.0101798	0.628694	0	0.00650325		0.00572492	0.00392542	0.00639053	0	0.238393	0	0.00177837	0.00585219	0.00162475	0.0227041	0.0285138	0.00857191	0.00551145	0.0162701	0.0220323	0.013628	0.0196659	0	0.141004	0.0390753	0.011968	0.0753662	0.0195937	0.0259567	0.00369369	0.00348225	0.00249204	0.00992119	0	0.00306319	0	0	0	0.00629843	0.00790386	0
Agtpbp1	0.139306	0.112656	0.131104	0.0690217	0.0953616	0	0	0.136021		0.117738	0.10873	0.210378	0.205138	0.134345	0	0.139422	0.169478	0.15321	0.119984	0.151254	0.135766	0.0925981	0.137306	0.195668	0.0809189	0.136394	0.349986	0.080841	0.142004	0.080657	0.128891	0.364688	0.117309	0.126558	0.133242	0.139856	0.153884	0.0729839	0.142587	0.186748	0.186804	0.170922	0.169214	0.175961	0.226783
Agtr1a	0.0556953	0.0441323	0.0504675	0	0.091604	0	0	0.0277357		0.0726854	0.0960651	0.0753311	0	0.0440992	0	0.0257223	0.0369062	0.0120113	0.0850764	0.0311882	0.0543165	0.0868822	0.0636932	0.0188473	0.102064	0.0640484	0	0.0533518	0.0240999	0.0226906	0.0583723	0	0.0438412	0.023145	0.0251292	0.0318808	0.0523681	0.0106936	0.0383841	0.0358038	0.0376824	0.0397409	0.0205632	0.0199936	0
Agtr1b	0	0	0	0	0	0	0	0		0	0	0	0	0	0	0	0	0	0	0	0	0	0.000394888	0	0	0.000340058	0	0	0.000339848	0	0	0	0	0	0	0	0	0	0	0	0	0	0	0	0
Agtr2	0	0	0	0	0.00112536	0	0	0.00406583		0.000286269	0	0	0	0.0250881	0	0.000135275	0.000879588	0	0.00358433	0	0.00281877	0.00192745	0.00123587	0	0	0.00024776	0	0	0.00197993	0	0.00221932	0	0.00187375	0.000802064	0	0.00193652	0.00250073	0	0.00125533	0	0	0	0	0	0
Agtrap	0.535179	0.382088	0.61687	0.259721	0.588153	0.384172	0.703878	0.704695		0.373767	0.235196	0.423028	0.438559	0.534466	0.583613	0.181949	0.233416	0.270713	0.276988	0.107103	0.302165	0.191572	0.282483	0.350873	0.160801	0.243456	0.301556	1.06505	0.358469	0.261657	0.270811	0.275061	0.382485	0.304572	0.292536	0.362005	0.322807	0.295541	0.39754	0.406789	0.255009	0.309494	0.187614	0.221573	0.226783
Agxt	0.00101712	0	0	0	0	0	0	0		0	0	0	0	0.00800369	0	0.00146548	0.00172566	0	0.00192151	0.000862632	0	0.000531402	0.00232231	0	0	0.000925599	0	0	0.000847534	0	0	0	0	0.000467357	0.00140264	0	0	0	0	0	0	0	0	0.000919747	0
Ahctf1	0.106557	0.183408	0.156996	0.123116	0.105951	0.307088	0	0.0873755		0.135051	0.12835	0.233317	0.0722439	0.160571	0.211874	0.154315	0.216386	0.23924	0.129967	0.271625	0.17643	0.111548	0.138763	0.181055	0.130289	0.127961	0.156779	0.0658381	0.188963	0.315947	0.126155	0.0749007	0.234204	0.183864	0.206778	0.238641	0.17069	0.0973788	0.24683	0.261637	0.174911	0.43269	0.207493	0.252675	0
[truncated: 16,930 more rows]

## Sheet: p.value
p-value	A			B			C			D			E			F			G			H			I			J			K			L			M			N			O
[truncated: 18,196 more rows]
